# Supplementary material
Source: PubMed Central journal article supplement (PMC5773288)
Supplement: NIHMS933474-supplement-Supplemental_Digital_Content_1-18.pdf [file NIHMS933474-supplement-Supplemental_Digital_Content_1-18.pdf]

# **Supplemental Digital Content 1**



## **Supplemental Digital Content 2**

| Year | Country | Population | GDP            | Human Development Index | Life Expectancy | Healthcare Expenditure | Government Expenditure | Private Expenditure |
|------|---------|------------|----------------|-------------------------|-----------------|------------------------|------------------------|---------------------|
| 2000 | Algeria | 29,558,000 | 12,250,000,000 | 0.640                   | 75.1            | 2.2                    | 2.2                    | 2.2                 |
| 2001 | Algeria | 29,760,000 | 12,500,000,000 | 0.645                   | 75.2            | 2.2                    | 2.2                    | 2.2                 |
| 2002 | Algeria | 29,962,000 | 12,750,000,000 | 0.650                   | 75.3            | 2.2                    | 2.2                    | 2.2                 |
| 2003 | Algeria | 30,164,000 | 13,000,000,000 | 0.655                   | 75.4            | 2.2                    | 2.2                    | 2.2                 |
| 2004 | Algeria | 30,366,000 | 13,250,000,000 | 0.660                   | 75.5            | 2.2                    | 2.2                    | 2.2                 |
| 2005 | Algeria | 30,568,000 | 13,500,000,000 | 0.665                   | 75.6            | 2.2                    | 2.2                    | 2.2                 |
| 2006 | Algeria | 30,770,000 | 13,750,000,000 | 0.670                   | 75.7            | 2.2                    | 2.2                    | 2.2                 |
| 2007 | Algeria | 30,972,000 | 14,000,000,000 | 0.675                   | 75.8            | 2.2                    | 2.2                    | 2.2                 |
| 2008 | Algeria | 31,174,000 | 14,250,000,000 | 0.680                   | 75.9            | 2.2                    | 2.2                    | 2.2                 |
| 2009 | Algeria | 31,376,000 | 14,500,000,000 | 0.685                   | 76.0            | 2.2                    | 2.2                    | 2.2                 |
| 2010 | Algeria | 31,578,000 | 14,750,000,000 | 0.690                   | 76.1            | 2.2                    | 2.2                    | 2.2                 |
| 2011 | Algeria | 31,780,000 | 15,000,000,000 | 0.695                   | 76.2            | 2.2                    | 2.2                    | 2.2                 |
| 2012 | Algeria | 31,982,000 | 15,250,000,000 | 0.700                   | 76.3            | 2.2                    | 2.2                    | 2.2                 |
| 2013 | Algeria | 32,184,000 | 15,500,000,000 | 0.705                   | 76.4            | 2.2                    | 2.2                    | 2.2                 |
| 2014 | Algeria | 32,386,000 | 15,750,000,000 | 0.710                   | 76.5            | 2.2                    | 2.2                    | 2.2                 |
| 2015 | Algeria | 32,588,000 | 16,000,000,000 | 0.715                   | 76.6            | 2.2                    | 2.2                    | 2.2                 |
| 2016 | Algeria | 32,790,000 | 16,250,000,000 | 0.720                   | 76.7            | 2.2                    | 2.2                    | 2.2                 |
| 2017 | Algeria | 32,992,000 | 16,500,000,000 | 0.725                   | 76.8            | 2.2                    | 2.2                    | 2.2                 |
| 2018 | Algeria | 33,194,000 | 16,750,000,000 | 0.730                   | 76.9            | 2.2                    | 2.2                    | 2.2                 |
| 2019 | Algeria | 33,396,000 | 17,000,000,000 | 0.735                   | 77.0            | 2.2                    | 2.2                    | 2.2                 |
| 2000 | Algeria | 29,558,000 | 12,250,000,000 | 0.640                   | 75.1            | 2.2                    | 2.2                    | 2.2                 |
| 2001 | Algeria | 29,760,000 | 12,500,000,000 | 0.645                   | 75.2            | 2.2                    | 2.2                    | 2.2                 |
| 2002 | Algeria | 29,962,000 | 12,750,000,000 | 0.650                   | 75.3            | 2.2                    | 2.2                    | 2.2                 |
| 2003 | Algeria | 30,164,000 | 13,000,000,000 | 0.655                   | 75.4            | 2.2                    | 2.2                    | 2.2                 |
| 2004 | Algeria | 30,366,000 | 13,250,000,000 | 0.660                   | 75.5            | 2.2                    | 2.2                    | 2.2                 |
| 2005 | Algeria | 30,568,000 | 13,500,000,000 | 0.665                   | 75.6            | 2.2                    | 2.2                    | 2.2                 |
| 2006 | Algeria | 30,770,000 | 13,750,000,000 | 0.670                   | 75.7            | 2.2                    | 2.2                    | 2.2                 |
| 2007 | Algeria | 30,972,000 | 14,000,000,000 | 0.675                   | 75.8            | 2.2                    | 2.2                    | 2.2                 |
| 2008 | Algeria | 31,174,000 | 14,250,000,000 | 0.680                   | 75.9            | 2.2                    | 2.2                    | 2.2                 |
| 2009 | Algeria | 31,376,000 | 14,500,000,000 | 0.685                   | 76.0            | 2.2                    | 2.2                    | 2.2                 |
| 2010 | Algeria | 31,578,000 | 14,750,000,000 | 0.690                   | 76.1            | 2.2                    | 2.2                    | 2.2                 |
| 2011 | Algeria | 31,780,000 | 15,000,000,000 | 0.695                   | 76.2            | 2.2                    | 2.2                    | 2.2                 |
| 2012 | Algeria | 31,982,000 | 15,250,000,000 | 0.700                   | 76.3            | 2.2                    | 2.2                    | 2.2                 |
| 2013 | Algeria | 32,184,000 | 15,500,000,000 | 0.705                   | 76.4            | 2.2                    | 2.2                    | 2.2                 |
| 2014 | Algeria | 32,386,000 | 15,750,000,000 | 0.710                   | 76.5            | 2.2                    | 2.2                    | 2.2                 |
| 2015 | Algeria | 32,588,000 | 16,000,000,000 | 0.715                   | 76.6            | 2.2                    | 2.2                    | 2.2                 |
| 2016 | Algeria | 32,790,000 | 16,250,000,000 | 0.720                   | 76.7            | 2.2                    | 2.2                    | 2.2                 |
| 2017 | Algeria | 32,992,000 | 16,500,000,000 | 0.725                   | 76.8            | 2.2                    | 2.2                    | 2.2                 |
| 2018 | Algeria | 33,194,000 | 16,750,000,000 | 0.730                   | 76.9            | 2.2                    | 2.2                    | 2.2                 |
| 2019 | Algeria | 33,396,000 | 17,000,000,000 | 0.735                   | 77.0            | 2.2                    | 2.2                    | 2.2                 |
| 2000 | Algeria | 29,558,000 | 12,250,000,000 | 0.640                   | 75.1            | 2.2                    | 2.2                    | 2.2                 |
| 2001 | Algeria | 29,760,000 | 12,500,000,000 | 0.645                   | 75.2            | 2.2                    | 2.2                    | 2.2                 |
| 2002 | Algeria | 29,962,000 | 12,750,000,000 | 0.650                   | 75.3            | 2.2                    | 2.2                    | 2.2                 |
| 2003 | Algeria | 30,164,000 | 13,000,000,000 | 0.655                   | 75.4            | 2.2                    | 2.2                    | 2.2                 |
| 2004 | Algeria | 30,366,000 | 13,250,000,000 | 0.660                   | 75.5            | 2.2                    | 2.2                    | 2.2                 |
| 2005 | Algeria | 30,568,000 | 13,500,000,000 | 0.665                   | 75.6            | 2.2                    | 2.2                    | 2.2                 |
| 2006 | Algeria | 30,770,000 | 13,750,000,000 | 0.670                   | 75.7            | 2.2                    | 2.2                    | 2.2                 |
| 2007 | Algeria | 30,972,000 | 14,000,000,000 | 0.675                   | 75.8            | 2.2                    | 2.2                    | 2.2                 |
| 2008 | Algeria | 31,174,000 | 14,250,000,000 | 0.680                   | 75.9            | 2.2                    | 2.2                    | 2.2                 |
| 2009 | Algeria | 31,376,000 | 14,500,000,000 | 0.685                   | 76.0            | 2.2                    | 2.2                    | 2.2                 |
| 2010 | Algeria | 31,578,000 | 14,750,000,000 | 0.690                   | 76.1            | 2.2                    | 2.2                    | 2.2                 |
| 2011 | Algeria | 31,780,000 | 15,000,000,000 | 0.695                   | 76.2            | 2.2                    | 2.2                    | 2.2                 |
| 2012 | Algeria | 31,982,000 | 15,250,000,000 | 0.700                   | 76.3            | 2.2                    | 2.2                    | 2.2                 |
| 2013 | Algeria | 32,184,000 | 15,500,000,000 | 0.705                   | 76.4            | 2.2                    | 2.2                    | 2.2                 |
| 2014 | Algeria | 32,386,000 | 15,750,000,000 | 0.710                   | 76.5            | 2.2                    | 2.2                    | 2.2                 |
| 2015 | Algeria | 32,588,000 | 16,000,000,000 | 0.715                   | 76.6            | 2.2                    | 2.2                    | 2.2                 |
| 2016 | Algeria | 32,790,000 | 16,250,000,000 | 0.720                   | 76.7            | 2.2                    | 2.2                    | 2.2                 |
| 2017 | Algeria | 32,992,000 | 16,500,000,000 | 0.725                   | 76.8            | 2.2                    | 2.2                    | 2.2                 |
| 2018 | Algeria | 33,194,000 | 16,750,000,000 | 0.730                   | 76.9            | 2.2                    | 2.2                    | 2.2                 |
| 2019 | Algeria | 33,396,000 | 17,000,000,000 | 0.735                   | 77.0            | 2.2                    | 2.2                    | 2.2                 |



| Year | Country | Population (millions) | Life expectancy at birth (years) | Infant mortality rate (per 1,000 live births) | Under-five mortality rate (per 1,000 live births) | Maternal mortality ratio (per 100,000 live births) | Sex ratio at birth (per 100 females) | Crude death rate (per 1,000 population) | Crude birth rate (per 1,000 population) | Total fertility rate (per woman) | Age-standardized mortality rate (per 100,000 population) | Age-standardized morbidity rate (per 100,000 population) | Age-standardized DALY rate (per 100,000 population) |
|------|---------|-----------------------|----------------------------------|-----------------------------------------------|---------------------------------------------------|----------------------------------------------------|--------------------------------------|-----------------------------------------|-----------------------------------------|----------------------------------|----------------------------------------------------------|----------------------------------------------------------|-----------------------------------------------------|
| 2000 | Algeria | 31.0                  | 75.0                             | 10.0                                          | 15.0                                              | 10.0                                               | 105.0                                | 10.0                                    | 15.0                                    | 1.5                              | 100.0                                                    | 100.0                                                    | 100.0                                               |
| 2001 | Algeria | 31.1                  | 75.1                             | 9.8                                           | 14.8                                              | 9.8                                                | 105.0                                | 9.8                                     | 14.8                                    | 1.5                              | 100.0                                                    | 100.0                                                    | 100.0                                               |
| 2002 | Algeria | 31.2                  | 75.2                             | 9.6                                           | 14.6                                              | 9.6                                                | 105.0                                | 9.6                                     | 14.6                                    | 1.5                              | 100.0                                                    | 100.0                                                    | 100.0                                               |
| 2003 | Algeria | 31.3                  | 75.3                             | 9.4                                           | 14.4                                              | 9.4                                                | 105.0                                | 9.4                                     | 14.4                                    | 1.5                              | 100.0                                                    | 100.0                                                    | 100.0                                               |
| 2004 | Algeria | 31.4                  | 75.4                             | 9.2                                           | 14.2                                              | 9.2                                                | 105.0                                | 9.2                                     | 14.2                                    | 1.5                              | 100.0                                                    | 100.0                                                    | 100.0                                               |
| 2005 | Algeria | 31.5                  | 75.5                             | 9.0                                           | 14.0                                              | 9.0                                                | 105.0                                | 9.0                                     | 14.0                                    | 1.5                              | 100.0                                                    | 100.0                                                    | 100.0                                               |
| 2006 | Algeria | 31.6                  | 75.6                             | 8.8                                           | 13.8                                              | 8.8                                                | 105.0                                | 8.8                                     | 13.8                                    | 1.5                              | 100.0                                                    | 100.0                                                    | 100.0                                               |
| 2007 | Algeria | 31.7                  | 75.7                             | 8.6                                           | 13.6                                              | 8.6                                                | 105.0                                | 8.6                                     | 13.6                                    | 1.5                              | 100.0                                                    | 100.0                                                    | 100.0                                               |
| 2008 | Algeria | 31.8                  | 75.8                             | 8.4                                           | 13.4                                              | 8.4                                                | 105.0                                | 8.4                                     | 13.4                                    | 1.5                              | 100.0                                                    | 100.0                                                    | 100.0                                               |
| 2009 | Algeria | 31.9                  | 75.9                             | 8.2                                           | 13.2                                              | 8.2                                                | 105.0                                | 8.2                                     | 13.2                                    | 1.5                              | 100.0                                                    | 100.0                                                    | 100.0                                               |
| 2010 | Algeria | 32.0                  | 76.0                             | 8.0                                           | 13.0                                              | 8.0                                                | 105.0                                | 8.0                                     | 13.0                                    | 1.5                              | 100.0                                                    | 100.0                                                    | 100.0                                               |
| 2011 | Algeria | 32.1                  | 76.1                             | 7.8                                           | 12.8                                              | 7.8                                                | 105.0                                | 7.8                                     | 12.8                                    | 1.5                              | 100.0                                                    | 100.0                                                    | 100.0                                               |
| 2012 | Algeria | 32.2                  | 76.2                             | 7.6                                           | 12.6                                              | 7.6                                                | 105.0                                | 7.6                                     | 12.6                                    | 1.5                              | 100.0                                                    | 100.0                                                    | 100.0                                               |
| 2013 | Algeria | 32.3                  | 76.3                             | 7.4                                           | 12.4                                              | 7.4                                                | 105.0                                | 7.4                                     | 12.4                                    | 1.5                              | 100.0                                                    | 100.0                                                    | 100.0                                               |
| 2014 | Algeria | 32.4                  | 76.4                             | 7.2                                           | 12.2                                              | 7.2                                                | 105.0                                | 7.2                                     | 12.2                                    | 1.5                              | 100.0                                                    | 100.0                                                    | 100.0                                               |
| 2015 | Algeria | 32.5                  | 76.5                             | 7.0                                           | 12.0                                              | 7.0                                                | 105.0                                | 7.0                                     | 12.0                                    | 1.5                              | 100.0                                                    | 100.0                                                    | 100.0                                               |
| 2016 | Algeria | 32.6                  | 76.6                             | 6.8                                           | 11.8                                              | 6.8                                                | 105.0                                | 6.8                                     | 11.8                                    | 1.5                              | 100.0                                                    | 100.0                                                    | 100.0                                               |
| 2017 | Algeria | 32.7                  | 76.7                             | 6.6                                           | 11.6                                              | 6.6                                                | 105.0                                | 6.6                                     | 11.6                                    | 1.5                              | 100.0                                                    | 100.0                                                    | 100.0                                               |
| 2018 | Algeria | 32.8                  | 76.8                             | 6.4                                           | 11.4                                              | 6.4                                                | 105.0                                | 6.4                                     | 11.4                                    | 1.5                              | 100.0                                                    | 100.0                                                    | 100.0                                               |
| 2019 | Algeria | 32.9                  | 76.9                             | 6.2                                           | 11.2                                              | 6.2                                                | 105.0                                | 6.2                                     | 11.2                                    | 1.5                              | 100.0                                                    | 100.0                                                    | 100.0                                               |
| 2020 | Algeria | 33.0                  | 77.0                             | 6.0                                           | 11.0                                              | 6.0                                                | 105.0                                | 6.0                                     | 11.0                                    | 1.5                              | 100.0                                                    | 100.0                                                    | 100.0                                               |
| 2000 | Algeria | 31.0                  | 75.0                             | 10.0                                          | 15.0                                              | 10.0                                               | 105.0                                | 10.0                                    | 15.0                                    | 1.5                              | 100.0                                                    | 100.0                                                    | 100.0                                               |
| 2001 | Algeria | 31.1                  | 75.1                             | 9.8                                           | 14.8                                              | 9.8                                                | 105.0                                | 9.8                                     | 14.8                                    | 1.5                              | 100.0                                                    | 100.0                                                    | 100.0                                               |
| 2002 | Algeria | 31.2                  | 75.2                             | 9.6                                           | 14.6                                              | 9.6                                                | 105.0                                | 9.6                                     | 14.6                                    | 1.5                              | 100.0                                                    | 100.0                                                    | 100.0                                               |
| 2003 | Algeria | 31.3                  | 75.3                             | 9.4                                           | 14.4                                              | 9.4                                                | 105.0                                | 9.4                                     | 14.4                                    | 1.5                              | 100.0                                                    | 100.0                                                    | 100.0                                               |
| 2004 | Algeria | 31.4                  | 75.4                             | 9.2                                           | 14.2                                              | 9.2                                                | 105.0                                | 9.2                                     | 14.2                                    | 1.5                              | 100.0                                                    | 100.0                                                    | 100.0                                               |
| 2005 | Algeria | 31.5                  | 75.5                             | 9.0                                           | 14.0                                              | 9.0                                                | 105.0                                | 9.0                                     | 14.0                                    | 1.5                              | 100.0                                                    | 100.0                                                    | 100.0                                               |
| 2006 | Algeria | 31.6                  | 75.6                             | 8.8                                           | 13.8                                              | 8.8                                                | 105.0                                | 8.8                                     | 13.8                                    | 1.5                              | 100.0                                                    | 100.0                                                    | 100.0                                               |
| 2007 | Algeria | 31.7                  | 75.7                             | 8.6                                           | 13.6                                              | 8.6                                                | 105.0                                | 8.6                                     | 13.6                                    | 1.5                              | 100.0                                                    | 100.0                                                    | 100.0                                               |
| 2008 | Algeria | 31.8                  | 75.8                             | 8.4                                           | 13.4                                              | 8.4                                                | 105.0                                | 8.4                                     | 13.4                                    | 1.5                              | 100.0                                                    | 100.0                                                    | 100.0                                               |
| 2009 | Algeria | 31.9                  | 75.9                             | 8.2                                           | 13.2                                              | 8.2                                                | 105.0                                | 8.2                                     | 13.2                                    | 1.5                              | 100.0                                                    | 100.0                                                    | 100.0                                               |
| 2010 | Algeria | 32.0                  | 76.0                             | 8.0                                           | 13.0                                              | 8.0                                                | 105.0                                | 8.0                                     | 13.0                                    | 1.5                              | 100.0                                                    | 100.0                                                    | 100.0                                               |
| 2011 | Algeria | 32.1                  | 76.1                             | 7.8                                           | 12.8                                              | 7.8                                                | 105.0                                | 7.8                                     | 12.8                                    | 1.5                              | 100.0                                                    | 100.0                                                    | 100.0                                               |
| 2012 | Algeria | 32.2                  | 76.2                             | 7.6                                           | 12.6                                              | 7.6                                                | 105.0                                | 7.6                                     | 12.6                                    | 1.5                              | 100.0                                                    | 100.0                                                    | 100.0                                               |
| 2013 | Algeria | 32.3                  | 76.3                             | 7.4                                           | 12.4                                              | 7.4                                                | 105.0                                | 7.4                                     | 12.4                                    | 1.5                              | 100.0                                                    | 100.0                                                    | 100.0                                               |
| 2014 | Algeria | 32.4                  | 76.4                             | 7.2                                           | 12.2                                              | 7.2                                                | 105.0                                | 7.2                                     | 12.2                                    | 1.5                              | 100.0                                                    | 100.0                                                    | 100.0                                               |
| 2015 | Algeria | 32.5                  | 76.5                             | 7.0                                           | 12.0                                              | 7.0                                                | 105.0                                | 7.0                                     | 12.0                                    | 1.5                              | 100.0                                                    | 100.0                                                    | 100.0                                               |
| 2016 | Algeria | 32.6                  | 76.6                             | 6.8                                           | 11.8                                              | 6.8                                                | 105.0                                | 6.8                                     | 11.8                                    | 1.5                              | 100.0                                                    | 100.0                                                    | 100.0                                               |
| 2017 | Algeria | 32.7                  | 76.7                             | 6.6                                           | 11.6                                              | 6.6                                                | 105.0                                | 6.6                                     | 11.6                                    | 1.5                              | 100.0                                                    | 100.0                                                    | 100.0                                               |
| 2018 | Algeria | 32.8                  | 76.8                             | 6.4                                           | 11.4                                              | 6.4                                                | 105.0                                | 6.4                                     | 11.4                                    | 1.5                              | 100.0                                                    | 100.0                                                    | 100.0                                               |
| 2019 | Algeria | 32.9                  | 76.9                             | 6.2                                           | 11.2                                              | 6.2                                                | 105.0                                | 6.2                                     | 11.2                                    | 1.5                              | 100.0                                                    | 100.0                                                    | 100.0                                               |
| 2020 | Algeria | 33.0                  | 77.0                             | 6.0                                           | 11.0                                              | 6.0                                                | 105.0                                | 6.0                                     | 11.0                                    | 1.5                              | 100.0                                                    | 100.0                                                    | 100.0                                               |













































































## **Supplemental Digital Content 3**





## **Supplemental Digital Content 4**





Supplemental Digital Content 4b

| Data from the GWAS Catalog and SNAP Proxy Tool |            |                                           |          |                       | Alcoholic Hepatitis GWAS Data for Proxies |        |        |          |       |             |
|------------------------------------------------|------------|-------------------------------------------|----------|-----------------------|-------------------------------------------|--------|--------|----------|-------|-------------|
| Genome-Wide Significant SNP                    | Proxy      | Nucleotide Distance between SNP and Proxy | RSquared | HG19 Genomic Position | Probe ID                                  | F A    | F U    | P        | OR    | MAF MEGA    |
| rs2294915                                      | rs2294915  | 0                                         | 1        | chr22:44340904        | 22:44340904-C-T                           | 0.3611 | 0.2312 | 8.24E-03 | 1.88  | 0.295085246 |
| rs3747207                                      | rs2294915  | 16049                                     | 0.913    | chr22:44340904        | 22:44340904-C-T                           | 0.3611 | 0.2312 | 8.24E-03 | 1.88  | 0.295085246 |
| rs738408                                       | rs2294915  | 16174                                     | 0.869    | chr22:44340904        | 22:44340904-C-T                           | 0.3611 | 0.2312 | 8.24E-03 | 1.88  | 0.295085246 |
| rs738409                                       | rs2294915  | 16177                                     | 0.913    | chr22:44340904        | 22:44340904-C-T                           | 0.3611 | 0.2312 | 8.24E-03 | 1.88  | 0.295085246 |
| rs2294922                                      | rs2294915  | 38661                                     | 0.83     | chr22:44340904        | 22:44340904-C-T                           | 0.3611 | 0.2312 | 8.24E-03 | 1.88  | 0.295085246 |
| rs3747207                                      | rs3747207  | 0                                         | 1        | chr22:44324855        | 22:44324855-G-A                           | 0.3389 | 0.2151 | 9.95E-03 | 1.871 | 0.275985246 |
| rs738409                                       | rs738409   | 0                                         | 1        | chr22:44324727        | exm1615904                                | 0.3389 | 0.2151 | 9.95E-03 | 1.871 | 0.275985246 |
| rs738408                                       | rs738409   | 3                                         | 0.955    | chr22:44324727        | exm1615904                                | 0.3389 | 0.2151 | 9.95E-03 | 1.871 | 0.275985246 |
| rs738408                                       | rs3747207  | 125                                       | 0.955    | chr22:44324855        | 22:44324855-G-A                           | 0.3389 | 0.2151 | 9.95E-03 | 1.871 | 0.275985246 |
| rs3747207                                      | rs738409   | 128                                       | 1        | chr22:44324727        | exm1615904                                | 0.3389 | 0.2151 | 9.95E-03 | 1.871 | 0.275985246 |
| rs738409                                       | rs3747207  | 128                                       | 1        | chr22:44324855        | 22:44324855-G-A                           | 0.3389 | 0.2151 | 9.95E-03 | 1.871 | 0.275985246 |
| rs2294915                                      | rs3747207  | 16049                                     | 0.913    | chr22:44324855        | 22:44324855-G-A                           | 0.3389 | 0.2151 | 9.95E-03 | 1.871 | 0.275985246 |
| rs2294915                                      | rs738409   | 16177                                     | 0.913    | chr22:44324727        | exm1615904                                | 0.3389 | 0.2151 | 9.95E-03 | 1.871 | 0.275985246 |
| rs2281137                                      | rs2281137  | 0                                         | 1        | chr22:44332493        | 22:44332493-T-C                           | 0.2556 | 0.1559 | 2.00E-02 | 1.858 | 0.204932787 |
| rs2281138                                      | rs2281137  | 16                                        | 0.895    | chr22:44332493        | 22:44332493-T-C                           | 0.2556 | 0.1559 | 2.00E-02 | 1.858 | 0.204932787 |
| rs2281135                                      | rs2281137  | 77                                        | 0.895    | chr22:44332493        | 22:44332493-T-C                           | 0.2556 | 0.1559 | 2.00E-02 | 1.858 | 0.204932787 |
| rs2072907                                      | rs2281137  | 160                                       | 0.895    | chr22:44332493        | 22:44332493-T-C                           | 0.2556 | 0.1559 | 2.00E-02 | 1.858 | 0.204932787 |
| rs34879941                                     | rs2281137  | 385                                       | 0.895    | chr22:44332493        | 22:44332493-T-C                           | 0.2556 | 0.1559 | 2.00E-02 | 1.858 | 0.204932787 |
| rs1883349                                      | rs2281137  | 550                                       | 0.895    | chr22:44332493        | 22:44332493-T-C                           | 0.2556 | 0.1559 | 2.00E-02 | 1.858 | 0.204932787 |
| rs1883348                                      | rs2281137  | 678                                       | 0.895    | chr22:44332493        | 22:44332493-T-C                           | 0.2556 | 0.1559 | 2.00E-02 | 1.858 | 0.204932787 |
| rs2072906                                      | rs2281137  | 679                                       | 0.895    | chr22:44332493        | 22:44332493-T-C                           | 0.2556 | 0.1559 | 2.00E-02 | 1.858 | 0.204932787 |
| rs13056638                                     | rs2281137  | 715                                       | 0.895    | chr22:44332493        | 22:44332493-T-C                           | 0.2556 | 0.1559 | 2.00E-02 | 1.858 | 0.204932787 |
| rs2076207                                      | rs2281137  | 877                                       | 0.895    | chr22:44332493        | 22:44332493-T-C                           | 0.2556 | 0.1559 | 2.00E-02 | 1.858 | 0.204932787 |
| rs1997693                                      | rs2281137  | 980                                       | 0.895    | chr22:44332493        | 22:44332493-T-C                           | 0.2556 | 0.1559 | 2.00E-02 | 1.858 | 0.204932787 |
| rs2072905                                      | rs2281137  | 986                                       | 0.895    | chr22:44332493        | 22:44332493-T-C                           | 0.2556 | 0.1559 | 2.00E-02 | 1.858 | 0.204932787 |
| rs2896019                                      | rs2281137  | 1201                                      | 0.895    | chr22:44332493        | 22:44332493-T-C                           | 0.2556 | 0.1559 | 2.00E-02 | 1.858 | 0.204932787 |
| rs2401512                                      | rs2281137  | 1452                                      | 0.895    | chr22:44332493        | 22:44332493-T-C                           | 0.2556 | 0.1559 | 2.00E-02 | 1.858 | 0.204932787 |
| rs2896020                                      | rs2281137  | 1475                                      | 0.895    | chr22:44332493        | 22:44332493-T-C                           | 0.2556 | 0.1559 | 2.00E-02 | 1.858 | 0.204932787 |
| rs4823176                                      | rs2281137  | 1983                                      | 0.836    | chr22:44332493        | 22:44332493-T-C                           | 0.2556 | 0.1559 | 2.00E-02 | 1.858 | 0.204932787 |
| rs4823177                                      | rs2281137  | 1993                                      | 0.836    | chr22:44332493        | 22:44332493-T-C                           | 0.2556 | 0.1559 | 2.00E-02 | 1.858 | 0.204932787 |
| rs4823178                                      | rs2281137  | 2036                                      | 0.836    | chr22:44332493        | 22:44332493-T-C                           | 0.2556 | 0.1559 | 2.00E-02 | 1.858 | 0.204932787 |
| rs16991175                                     | rs2281137  | 2838                                      | 0.836    | chr22:44332493        | 22:44332493-T-C                           | 0.2556 | 0.1559 | 2.00E-02 | 1.858 | 0.204932787 |
| rs35621602                                     | rs2281137  | 2913                                      | 0.895    | chr22:44332493        | 22:44332493-T-C                           | 0.2556 | 0.1559 | 2.00E-02 | 1.858 | 0.204932787 |
| rs34352134                                     | rs2281137  | 2923                                      | 0.895    | chr22:44332493        | 22:44332493-T-C                           | 0.2556 | 0.1559 | 2.00E-02 | 1.858 | 0.204932787 |
| rs2073081                                      | rs2281137  | 3251                                      | 0.895    | chr22:44332493        | 22:44332493-T-C                           | 0.2556 | 0.1559 | 2.00E-02 | 1.858 | 0.204932787 |
| rs1010023                                      | rs2281137  | 3605                                      | 0.895    | chr22:44332493        | 22:44332493-T-C                           | 0.2556 | 0.1559 | 2.00E-02 | 1.858 | 0.204932787 |
| rs1010022                                      | rs2281137  | 3817                                      | 0.895    | chr22:44332493        | 22:44332493-T-C                           | 0.2556 | 0.1559 | 2.00E-02 | 1.858 | 0.204932787 |
| rs73176497                                     | rs2281137  | 4464                                      | 0.895    | chr22:44332493        | 22:44332493-T-C                           | 0.2556 | 0.1559 | 2.00E-02 | 1.858 | 0.204932787 |
| rs926633                                       | rs2281137  | 5040                                      | 0.895    | chr22:44332493        | 22:44332493-T-C                           | 0.2556 | 0.1559 | 2.00E-02 | 1.858 | 0.204932787 |
| rs13056555                                     | rs2281137  | 7033                                      | 0.895    | chr22:44332493        | 22:44332493-T-C                           | 0.2556 | 0.1559 | 2.00E-02 | 1.858 | 0.204932787 |
| rs36069781                                     | rs2281137  | 7593                                      | 0.895    | chr22:44332493        | 22:44332493-T-C                           | 0.2556 | 0.1559 | 2.00E-02 | 1.858 | 0.204932787 |
| rs4823179                                      | rs2281137  | 8700                                      | 0.895    | chr22:44332493        | 22:44332493-T-C                           | 0.2556 | 0.1559 | 2.00E-02 | 1.858 | 0.204932787 |
| rs4823180                                      | rs2281137  | 8805                                      | 0.895    | chr22:44332493        | 22:44332493-T-C                           | 0.2556 | 0.1559 | 2.00E-02 | 1.858 | 0.204932787 |
| rs4823181                                      | rs2281137  | 9113                                      | 0.895    | chr22:44332493        | 22:44332493-T-C                           | 0.2556 | 0.1559 | 2.00E-02 | 1.858 | 0.204932787 |
| rs13055900                                     | rs2281137  | 9173                                      | 0.895    | chr22:44332493        | 22:44332493-T-C                           | 0.2556 | 0.1559 | 2.00E-02 | 1.858 | 0.204932787 |
| rs13055874                                     | rs2281137  | 9179                                      | 0.895    | chr22:44332493        | 22:44332493-T-C                           | 0.2556 | 0.1559 | 2.00E-02 | 1.858 | 0.204932787 |
| rs2008451                                      | rs2281137  | 10476                                     | 0.895    | chr22:44332493        | 22:44332493-T-C                           | 0.2556 | 0.1559 | 2.00E-02 | 1.858 | 0.204932787 |
| rs2092501                                      | rs2281137  | 14758                                     | 0.836    | chr22:44332493        | 22:44332493-T-C                           | 0.2556 | 0.1559 | 2.00E-02 | 1.858 | 0.204932787 |
| rs34912062                                     | rs2281137  | 15953                                     | 0.836    | chr22:44332493        | 22:44332493-T-C                           | 0.2556 | 0.1559 | 2.00E-02 | 1.858 | 0.204932787 |
| rs1474745                                      | rs2281137  | 16743                                     | 0.836    | chr22:44332493        | 22:44332493-T-C                           | 0.2556 | 0.1559 | 2.00E-02 | 1.858 | 0.204932787 |
| rs13056638                                     | rs13056638 | 0                                         | 1        | chr22:44331778        | 22:44331778-C-G                           | 0.2611 | 0.1613 | 2.12E-02 | 1.838 | 0.210381967 |
| rs1997693                                      | rs1997693  | 0                                         | 1        | chr22:44331513        | 22:44331513-C-G                           | 0.2611 | 0.1613 | 2.12E-02 | 1.838 | 0.210381967 |
| rs2072907                                      | rs2072907  | 0                                         | 1        | chr22:44332653        | 22:44332653-C-G                           | 0.2611 | 0.1613 | 2.12E-02 | 1.838 | 0.210381967 |
| rs2076207                                      | rs2076207  | 0                                         | 1        | chr22:44333370        | 22:44333370-A-G                           | 0.2611 | 0.1613 | 2.12E-02 | 1.838 | 0.210381967 |
| rs2281138                                      | rs2281138  | 0                                         | 1        | chr22:44332477        | 22:44332477-T-C                           | 0.2611 | 0.1613 | 2.12E-02 | 1.838 | 0.210381967 |
| rs2281137                                      | rs2281138  | 16                                        | 0.895    | chr22:44332477        | 22:44332477-T-C                           | 0.2611 | 0.1613 | 2.12E-02 | 1.838 | 0.210381967 |
| rs1883348                                      | rs13056638 | 37                                        | 1        | chr22:44331778        | 22:44331778-C-G                           | 0.2611 | 0.1613 | 2.12E-02 | 1.838 | 0.210381967 |
| rs2281135                                      | rs2072907  | 83                                        | 1        | chr22:44332653        | 22:44332653-C-G                           | 0.2611 | 0.1613 | 2.12E-02 | 1.838 | 0.210381967 |
| rs2281138                                      | rs2281138  | 93                                        | 1        | chr22:44332477        | 22:44332477-T-C                           | 0.2611 | 0.1613 | 2.12E-02 | 1.838 | 0.210381967 |
| rs2072905                                      | rs2076207  | 109                                       | 1        | chr22:44333370        | 22:44333370-A-G                           | 0.2611 | 0.1613 | 2.12E-02 | 1.838 | 0.210381967 |
| rs2281137                                      | rs2072907  | 160                                       | 0.895    | chr22:44332653        | 22:44332653-C-G                           | 0.2611 | 0.1613 | 2.12E-02 | 1.838 | 0.210381967 |
| rs1883349                                      | rs13056638 | 165                                       | 1        | chr22:44331778        | 22:44331778-C-G                           | 0.2611 | 0.1613 | 2.12E-02 | 1.838 | 0.210381967 |
| rs2072907                                      | rs2281138  | 176                                       | 1        | chr22:44332477        | 22:44332477-T-C                           | 0.2611 | 0.1613 | 2.12E-02 | 1.838 | 0.210381967 |
| rs2281138                                      | rs2072907  | 176                                       | 1        | chr22:44332653        | 22:44332653-C-G                           | 0.2611 | 0.1613 | 2.12E-02 | 1.838 | 0.210381967 |
| rs2072906                                      | rs2076207  | 198                                       | 1        | chr22:44333370        | 22:44333370-A-G                           | 0.2611 | 0.1613 | 2.12E-02 | 1.838 | 0.210381967 |
| rs34879941                                     | rs2072907  | 225                                       | 1        | chr22:44332653        | 22:44332653-C-G                           | 0.2611 | 0.1613 | 2.12E-02 | 1.838 | 0.210381967 |
| rs13056638                                     | rs1997693  | 265                                       | 1        | chr22:44331513        | 22:44331513-C-G                           | 0.2611 | 0.1613 | 2.12E-02 | 1.838 | 0.210381967 |
| rs1997693                                      | rs13056638 | 265                                       | 1        | chr22:44331778        | 22:44331778-C-G                           | 0.2611 | 0.1613 | 2.12E-02 | 1.838 | 0.210381967 |
| rs1883348                                      | rs1997693  | 302                                       | 1        | chr22:44331513        | 22:44331513-C-G                           | 0.2611 | 0.1613 | 2.12E-02 | 1.838 | 0.210381967 |
| rs2896019                                      | rs2076207  | 324                                       | 1        | chr22:44333370        | 22:44333370-A-G                           | 0.2611 | 0.1613 | 2.12E-02 | 1.838 | 0.210381967 |
| rs34879941                                     | rs2281138  | 401                                       | 1        | chr22:44332477        | 22:44332477-T-C                           | 0.2611 | 0.1613 | 2.12E-02 | 1.838 | 0.210381967 |
| rs1883349                                      | rs1997693  | 430                                       | 1        | chr22:44331513        | 22:44331513-C-G                           | 0.2611 | 0.1613 | 2.12E-02 | 1.838 | 0.210381967 |
| rs34879941                                     | rs2076207  | 492                                       | 1        | chr22:44333370        | 22:44333370-A-G                           | 0.2611 | 0.1613 | 2.12E-02 | 1.838 | 0.210381967 |
| rs2072906                                      | rs2072907  | 519                                       | 1        | chr22:44332653        | 22:44332653-C-G                           | 0.2611 | 0.1613 | 2.12E-02 | 1.838 | 0.210381967 |
| rs1883349                                      | rs2281138  | 534                                       | 1        | chr22:44332477        | 22:44332477-T-C                           | 0.2611 | 0.1613 | 2.12E-02 | 1.838 | 0.210381967 |
| rs2401512                                      | rs2076207  | 575                                       | 1        | chr22:44333370        | 22:44333370-A-G                           | 0.2611 | 0.1613 | 2.12E-02 | 1.838 | 0.210381967 |
| rs2896020                                      | rs2076207  | 598                                       | 1        | chr22:44333370        | 22:44333370-A-G                           | 0.2611 | 0.1613 | 2.12E-02 | 1.838 | 0.210381967 |
| rs1883348                                      | rs2281138  | 662                                       | 1        | chr22:44332477        | 22:44332477-T-C                           | 0.2611 | 0.1613 | 2.12E-02 | 1.838 | 0.210381967 |
| rs2072906                                      | rs2281138  | 695                                       | 1        | chr22:44332477        | 22:44332477-T-C                           | 0.2611 | 0.1613 | 2.12E-02 | 1.838 | 0.210381967 |
| rs13056638                                     | rs2281138  | 699                                       | 1        | chr22:44332477        | 22:44332477-T-C                           | 0.2611 | 0.1613 | 2.12E-02 | 1.838 | 0.210381967 |
| rs2281138                                      | rs13056638 | 699                                       | 1        | chr22:44331778        | 22:44331778-C-G                           | 0.2611 | 0.1613 | 2.12E-02 | 1.838 | 0.210381967 |
| rs1883349                                      | rs2072907  | 710                                       | 1        | chr22:44332653        | 22:44332653-C-G                           | 0.2611 | 0.1613 | 2.12E-02 | 1.838 | 0.210381967 |
| rs2281137                                      | rs13056638 | 715                                       | 0.895    | chr22:44331778        | 22:44331778-C-G                           | 0.2611 | 0.1613 | 2.12E-02 | 1.838 | 0.210381967 |
| rs2072907                                      | rs2076207  | 717                                       | 1        | chr22:44333370        | 22:44333370-A-G                           | 0.2611 | 0.1613 | 2.12E-02 | 1.838 | 0.210381967 |
| rs2076207                                      | rs2072907  | 717                                       | 1        | chr22:44332653        | 22:44332653-C-G                           | 0.2611 | 0.1613 | 2.12E-02 |       |             |

|            |            |      |       |                |                 |        |        |          |       |             |
|------------|------------|------|-------|----------------|-----------------|--------|--------|----------|-------|-------------|
| rs4823176  | rs2076207  | 1106 | 0.947 | chr22:44333370 | 22:44333370-A-G | 0.2611 | 0.1613 | 2.12E-02 | 1.838 | 0.210381967 |
| rs4823177  | rs2076207  | 1116 | 0.947 | chr22:44333370 | 22:44333370-A-G | 0.2611 | 0.1613 | 2.12E-02 | 1.838 | 0.210381967 |
| rs1997693  | rs2072907  | 1140 | 1     | chr22:44332653 | 22:44332653-C-G | 0.2611 | 0.1613 | 2.12E-02 | 1.838 | 0.210381967 |
| rs2072907  | rs1997693  | 1140 | 1     | chr22:44331513 | 22:44331513-C-G | 0.2611 | 0.1613 | 2.12E-02 | 1.838 | 0.210381967 |
| rs4823178  | rs2076207  | 1159 | 0.947 | chr22:44333370 | 22:44333370-A-G | 0.2611 | 0.1613 | 2.12E-02 | 1.838 | 0.210381967 |
| rs2896019  | rs2281138  | 1217 | 1     | chr22:44332477 | 22:44332477-T-C | 0.2611 | 0.1613 | 2.12E-02 | 1.838 | 0.210381967 |
| rs2401512  | rs2072907  | 1292 | 1     | chr22:44332653 | 22:44332653-C-G | 0.2611 | 0.1613 | 2.12E-02 | 1.838 | 0.210381967 |
| rs2896020  | rs2072907  | 1315 | 1     | chr22:44332653 | 22:44332653-C-G | 0.2611 | 0.1613 | 2.12E-02 | 1.838 | 0.210381967 |
| rs34879941 | rs1997693  | 1365 | 1     | chr22:44331513 | 22:44331513-C-G | 0.2611 | 0.1613 | 2.12E-02 | 1.838 | 0.210381967 |
| rs1977081  | rs1997693  | 1385 | 0.843 | chr22:44331513 | 22:44331513-C-G | 0.2611 | 0.1613 | 2.12E-02 | 1.838 | 0.210381967 |
| rs2072906  | rs13056638 | 1394 | 1     | chr22:44331778 | 22:44331778-C-G | 0.2611 | 0.1613 | 2.12E-02 | 1.838 | 0.210381967 |
| rs1883349  | rs2076207  | 1427 | 1     | chr22:44333370 | 22:44333370-A-G | 0.2611 | 0.1613 | 2.12E-02 | 1.838 | 0.210381967 |
| rs2401512  | rs2281138  | 1468 | 1     | chr22:44332477 | 22:44332477-T-C | 0.2611 | 0.1613 | 2.12E-02 | 1.838 | 0.210381967 |
| rs2896020  | rs2281138  | 1491 | 1     | chr22:44332477 | 22:44332477-T-C | 0.2611 | 0.1613 | 2.12E-02 | 1.838 | 0.210381967 |
| rs1883348  | rs2076207  | 1555 | 1     | chr22:44333370 | 22:44333370-A-G | 0.2611 | 0.1613 | 2.12E-02 | 1.838 | 0.210381967 |
| rs13056638 | rs2076207  | 1592 | 1     | chr22:44333370 | 22:44333370-A-G | 0.2611 | 0.1613 | 2.12E-02 | 1.838 | 0.210381967 |
| rs2076207  | rs13056638 | 1592 | 1     | chr22:44331778 | 22:44331778-C-G | 0.2611 | 0.1613 | 2.12E-02 | 1.838 | 0.210381967 |
| rs1977081  | rs13056638 | 1650 | 0.843 | chr22:44331778 | 22:44331778-C-G | 0.2611 | 0.1613 | 2.12E-02 | 1.838 | 0.210381967 |
| rs2072906  | rs1997693  | 1659 | 1     | chr22:44331513 | 22:44331513-C-G | 0.2611 | 0.1613 | 2.12E-02 | 1.838 | 0.210381967 |
| rs2072905  | rs13056638 | 1701 | 1     | chr22:44331778 | 22:44331778-C-G | 0.2611 | 0.1613 | 2.12E-02 | 1.838 | 0.210381967 |
| rs4823176  | rs2072907  | 1823 | 0.947 | chr22:44332653 | 22:44332653-C-G | 0.2611 | 0.1613 | 2.12E-02 | 1.838 | 0.210381967 |
| rs4823177  | rs2072907  | 1833 | 0.947 | chr22:44332653 | 22:44332653-C-G | 0.2611 | 0.1613 | 2.12E-02 | 1.838 | 0.210381967 |
| rs1997693  | rs2076207  | 1857 | 1     | chr22:44333370 | 22:44333370-A-G | 0.2611 | 0.1613 | 2.12E-02 | 1.838 | 0.210381967 |
| rs2076207  | rs1997693  | 1857 | 1     | chr22:44331513 | 22:44331513-C-G | 0.2611 | 0.1613 | 2.12E-02 | 1.838 | 0.210381967 |
| rs4823178  | rs2072907  | 1876 | 0.947 | chr22:44332653 | 22:44332653-C-G | 0.2611 | 0.1613 | 2.12E-02 | 1.838 | 0.210381967 |
| rs2896019  | rs13056638 | 1916 | 1     | chr22:44331778 | 22:44331778-C-G | 0.2611 | 0.1613 | 2.12E-02 | 1.838 | 0.210381967 |
| rs16991175 | rs2076207  | 1961 | 0.947 | chr22:44333370 | 22:44333370-A-G | 0.2611 | 0.1613 | 2.12E-02 | 1.838 | 0.210381967 |
| rs2072905  | rs1997693  | 1966 | 1     | chr22:44331513 | 22:44331513-C-G | 0.2611 | 0.1613 | 2.12E-02 | 1.838 | 0.210381967 |
| rs4823176  | rs2281138  | 1999 | 0.947 | chr22:44332477 | 22:44332477-T-C | 0.2611 | 0.1613 | 2.12E-02 | 1.838 | 0.210381967 |
| rs4823177  | rs2281138  | 2009 | 0.947 | chr22:44332477 | 22:44332477-T-C | 0.2611 | 0.1613 | 2.12E-02 | 1.838 | 0.210381967 |
| rs35621602 | rs2076207  | 2036 | 1     | chr22:44333370 | 22:44333370-A-G | 0.2611 | 0.1613 | 2.12E-02 | 1.838 | 0.210381967 |
| rs34352134 | rs2076207  | 2046 | 1     | chr22:44333370 | 22:44333370-A-G | 0.2611 | 0.1613 | 2.12E-02 | 1.838 | 0.210381967 |
| rs4823178  | rs2281138  | 2052 | 0.947 | chr22:44332477 | 22:44332477-T-C | 0.2611 | 0.1613 | 2.12E-02 | 1.838 | 0.210381967 |
| rs2401512  | rs13056638 | 2167 | 1     | chr22:44331778 | 22:44331778-C-G | 0.2611 | 0.1613 | 2.12E-02 | 1.838 | 0.210381967 |
| rs2896019  | rs1997693  | 2181 | 1     | chr22:44331513 | 22:44331513-C-G | 0.2611 | 0.1613 | 2.12E-02 | 1.838 | 0.210381967 |
| rs2896020  | rs13056638 | 2190 | 1     | chr22:44331778 | 22:44331778-C-G | 0.2611 | 0.1613 | 2.12E-02 | 1.838 | 0.210381967 |
| rs2294433  | rs1997693  | 2238 | 0.843 | chr22:44331513 | 22:44331513-C-G | 0.2611 | 0.1613 | 2.12E-02 | 1.838 | 0.210381967 |
| rs1977081  | rs2281138  | 2349 | 0.843 | chr22:44332477 | 22:44332477-T-C | 0.2611 | 0.1613 | 2.12E-02 | 1.838 | 0.210381967 |
| rs2073081  | rs2076207  | 2374 | 1     | chr22:44333370 | 22:44333370-A-G | 0.2611 | 0.1613 | 2.12E-02 | 1.838 | 0.210381967 |
| rs2401512  | rs1997693  | 2432 | 1     | chr22:44331513 | 22:44331513-C-G | 0.2611 | 0.1613 | 2.12E-02 | 1.838 | 0.210381967 |
| rs2076211  | rs1997693  | 2435 | 0.843 | chr22:44331513 | 22:44331513-C-G | 0.2611 | 0.1613 | 2.12E-02 | 1.838 | 0.210381967 |
| rs2896020  | rs1997693  | 2455 | 1     | chr22:44331513 | 22:44331513-C-G | 0.2611 | 0.1613 | 2.12E-02 | 1.838 | 0.210381967 |
| rs2294433  | rs13056638 | 2503 | 0.843 | chr22:44331778 | 22:44331778-C-G | 0.2611 | 0.1613 | 2.12E-02 | 1.838 | 0.210381967 |
| rs1977081  | rs2072907  | 2525 | 0.843 | chr22:44332653 | 22:44332653-C-G | 0.2611 | 0.1613 | 2.12E-02 | 1.838 | 0.210381967 |
| rs16991175 | rs2072907  | 2678 | 0.947 | chr22:44332653 | 22:44332653-C-G | 0.2611 | 0.1613 | 2.12E-02 | 1.838 | 0.210381967 |
| rs4823176  | rs13056638 | 2698 | 0.947 | chr22:44331778 | 22:44331778-C-G | 0.2611 | 0.1613 | 2.12E-02 | 1.838 | 0.210381967 |
| rs2076211  | rs13056638 | 2700 | 0.843 | chr22:44331778 | 22:44331778-C-G | 0.2611 | 0.1613 | 2.12E-02 | 1.838 | 0.210381967 |
| rs4823177  | rs13056638 | 2708 | 0.947 | chr22:44331778 | 22:44331778-C-G | 0.2611 | 0.1613 | 2.12E-02 | 1.838 | 0.210381967 |
| rs1010023  | rs2076207  | 2728 | 1     | chr22:44333370 | 22:44333370-A-G | 0.2611 | 0.1613 | 2.12E-02 | 1.838 | 0.210381967 |
| rs4823178  | rs13056638 | 2751 | 0.947 | chr22:44331778 | 22:44331778-C-G | 0.2611 | 0.1613 | 2.12E-02 | 1.838 | 0.210381967 |
| rs35621602 | rs2072907  | 2753 | 1     | chr22:44332653 | 22:44332653-C-G | 0.2611 | 0.1613 | 2.12E-02 | 1.838 | 0.210381967 |
| rs34352134 | rs2072907  | 2763 | 1     | chr22:44332653 | 22:44332653-C-G | 0.2611 | 0.1613 | 2.12E-02 | 1.838 | 0.210381967 |
| rs4823173  | rs1997693  | 2783 | 0.843 | chr22:44331513 | 22:44331513-C-G | 0.2611 | 0.1613 | 2.12E-02 | 1.838 | 0.210381967 |
| rs16991175 | rs2281138  | 2854 | 0.947 | chr22:44332477 | 22:44332477-T-C | 0.2611 | 0.1613 | 2.12E-02 | 1.838 | 0.210381967 |
| rs35621602 | rs2281138  | 2929 | 1     | chr22:44332477 | 22:44332477-T-C | 0.2611 | 0.1613 | 2.12E-02 | 1.838 | 0.210381967 |
| rs34352134 | rs2281138  | 2939 | 1     | chr22:44332477 | 22:44332477-T-C | 0.2611 | 0.1613 | 2.12E-02 | 1.838 | 0.210381967 |
| rs1010022  | rs2076207  | 2940 | 1     | chr22:44333370 | 22:44333370-A-G | 0.2611 | 0.1613 | 2.12E-02 | 1.838 | 0.210381967 |
| rs4823176  | rs1997693  | 2963 | 0.947 | chr22:44331513 | 22:44331513-C-G | 0.2611 | 0.1613 | 2.12E-02 | 1.838 | 0.210381967 |
| rs4823177  | rs1997693  | 2973 | 0.947 | chr22:44331513 | 22:44331513-C-G | 0.2611 | 0.1613 | 2.12E-02 | 1.838 | 0.210381967 |
| rs4823178  | rs1997693  | 3016 | 0.947 | chr22:44331513 | 22:44331513-C-G | 0.2611 | 0.1613 | 2.12E-02 | 1.838 | 0.210381967 |
| rs4823173  | rs13056638 | 3048 | 0.843 | chr22:44331778 | 22:44331778-C-G | 0.2611 | 0.1613 | 2.12E-02 | 1.838 | 0.210381967 |
| rs2073081  | rs2072907  | 3091 | 1     | chr22:44332653 | 22:44332653-C-G | 0.2611 | 0.1613 | 2.12E-02 | 1.838 | 0.210381967 |
| rs2294433  | rs2281138  | 3202 | 0.843 | chr22:44332477 | 22:44332477-T-C | 0.2611 | 0.1613 | 2.12E-02 | 1.838 | 0.210381967 |
| rs1977081  | rs2076207  | 3242 | 0.843 | chr22:44333370 | 22:44333370-A-G | 0.2611 | 0.1613 | 2.12E-02 | 1.838 | 0.210381967 |
| rs2073081  | rs2281138  | 3267 | 1     | chr22:44332477 | 22:44332477-T-C | 0.2611 | 0.1613 | 2.12E-02 | 1.838 | 0.210381967 |
| rs2294433  | rs2072907  | 3378 | 0.843 | chr22:44332653 | 22:44332653-C-G | 0.2611 | 0.1613 | 2.12E-02 | 1.838 | 0.210381967 |
| rs2076211  | rs2281138  | 3399 | 0.843 | chr22:44332477 | 22:44332477-T-C | 0.2611 | 0.1613 | 2.12E-02 | 1.838 | 0.210381967 |
| rs1010023  | rs2072907  | 3445 | 1     | chr22:44332653 | 22:44332653-C-G | 0.2611 | 0.1613 | 2.12E-02 | 1.838 | 0.210381967 |
| rs16991175 | rs13056638 | 3553 | 0.947 | chr22:44331778 | 22:44331778-C-G | 0.2611 | 0.1613 | 2.12E-02 | 1.838 | 0.210381967 |
| rs2076211  | rs2072907  | 3575 | 0.843 | chr22:44332653 | 22:44332653-C-G | 0.2611 | 0.1613 | 2.12E-02 | 1.838 | 0.210381967 |
| rs73176497 | rs2076207  | 3587 | 1     | chr22:44333370 | 22:44333370-A-G | 0.2611 | 0.1613 | 2.12E-02 | 1.838 | 0.210381967 |
| rs1010023  | rs2281138  | 3621 | 1     | chr22:44332477 | 22:44332477-T-C | 0.2611 | 0.1613 | 2.12E-02 | 1.838 | 0.210381967 |
| rs35621602 | rs13056638 | 3628 | 1     | chr22:44331778 | 22:44331778-C-G | 0.2611 | 0.1613 | 2.12E-02 | 1.838 | 0.210381967 |
| rs34352134 | rs13056638 | 3638 | 1     | chr22:44331778 | 22:44331778-C-G | 0.2611 | 0.1613 | 2.12E-02 | 1.838 | 0.210381967 |
| rs1010022  | rs2072907  | 3657 | 1     | chr22:44332653 | 22:44332653-C-G | 0.2611 | 0.1613 | 2.12E-02 | 1.838 | 0.210381967 |
| rs4823173  | rs2281138  | 3747 | 0.843 | chr22:44332477 | 22:44332477-T-C | 0.2611 | 0.1613 | 2.12E-02 | 1.838 | 0.210381967 |
| rs16991175 | rs1997693  | 3818 | 0.947 | chr22:44331513 | 22:44331513-C-G | 0.2611 | 0.1613 | 2.12E-02 | 1.838 | 0.210381967 |
| rs1010022  | rs2281138  | 3833 | 1     | chr22:44332477 | 22:44332477-T-C | 0.2611 | 0.1613 | 2.12E-02 | 1.838 | 0.210381967 |
| rs35621602 | rs1997693  | 3893 | 1     | chr22:44331513 | 22:44331513-C-G | 0.2611 | 0.1613 | 2.12E-02 | 1.838 | 0.210381967 |
| rs34352134 | rs1997693  | 3903 | 1     | chr22:44331513 | 22:44331513-C-G | 0.2611 | 0.1613 | 2.12E-02 | 1.838 | 0.210381967 |
| rs4823173  | rs2072907  | 3923 | 0.843 | chr22:44332653 | 22:44332653-C-G | 0.2611 | 0.1613 | 2.12E-02 | 1.838 | 0.210381967 |
| rs2073081  | rs13056638 | 3966 | 1     | chr22:44331778 | 22:44331778-C-G | 0.2611 | 0.1613 | 2.12E-02 | 1.838 | 0.210381967 |
| rs2294433  | rs2076207  | 4095 | 0.843 | chr22:44333370 | 22:44333370-A-G | 0.2611 | 0.1613 | 2.12E-02 | 1.838 | 0.210381967 |
| rs926633   | rs2076207  | 4163 | 1     | chr22:44333370 | 22:44333370-A-G | 0.2611 | 0.1613 | 2.12E-02 | 1.838 | 0.210381967 |
| rs2073081  | rs1997693  | 4231 | 1     | chr22:44331513 | 22:44331513-C-G | 0.2611 | 0.1613 | 2.12E-02 | 1.838 | 0.210381967 |
| rs12484700 | rs1997693  | 4240 | 0.843 | chr22:44331513 | 22:44331513-C-G | 0.2611 |        |          |       |             |

|            |            |       |       |                |                 |        |        |          |       |             |
|------------|------------|-------|-------|----------------|-----------------|--------|--------|----------|-------|-------------|
| rs36055245 | rs2072907  | 5461  | 0.843 | chr22:44332653 | 22:44332653-C-G | 0.2611 | 0.1613 | 2.12E-02 | 1.838 | 0.210381967 |
| rs9625962  | rs13056638 | 5506  | 0.843 | chr22:44331778 | 22:44331778-C-G | 0.2611 | 0.1613 | 2.12E-02 | 1.838 | 0.210381967 |
| rs12483959 | rs1997693  | 5517  | 0.843 | chr22:44331513 | 22:44331513-C-G | 0.2611 | 0.1613 | 2.12E-02 | 1.838 | 0.210381967 |
| rs926633   | rs13056638 | 5755  | 1     | chr22:44331778 | 22:44331778-C-G | 0.2611 | 0.1613 | 2.12E-02 | 1.838 | 0.210381967 |
| rs11090617 | rs2281138  | 5777  | 0.843 | chr22:44332477 | 22:44332477-T-C | 0.2611 | 0.1613 | 2.12E-02 | 1.838 | 0.210381967 |
| rs12483959 | rs13056638 | 5782  | 0.843 | chr22:44331778 | 22:44331778-C-G | 0.2611 | 0.1613 | 2.12E-02 | 1.838 | 0.210381967 |
| rs11090617 | rs2072907  | 5953  | 0.843 | chr22:44332653 | 22:44332653-C-G | 0.2611 | 0.1613 | 2.12E-02 | 1.838 | 0.210381967 |
| rs926633   | rs1997693  | 6020  | 1     | chr22:44331513 | 22:44331513-C-G | 0.2611 | 0.1613 | 2.12E-02 | 1.838 | 0.210381967 |
| rs12484700 | rs2076207  | 6097  | 0.843 | chr22:44333370 | 22:44333370-A-G | 0.2611 | 0.1613 | 2.12E-02 | 1.838 | 0.210381967 |
| rs13056555 | rs2076207  | 6156  | 1     | chr22:44333370 | 22:44333370-A-G | 0.2611 | 0.1613 | 2.12E-02 | 1.838 | 0.210381967 |
| rs36055245 | rs2076207  | 6178  | 0.843 | chr22:44333370 | 22:44333370-A-G | 0.2611 | 0.1613 | 2.12E-02 | 1.838 | 0.210381967 |
| rs9625962  | rs2281138  | 6205  | 0.843 | chr22:44332477 | 22:44332477-T-C | 0.2611 | 0.1613 | 2.12E-02 | 1.838 | 0.210381967 |
| rs9625962  | rs2072907  | 6381  | 0.843 | chr22:44332653 | 22:44332653-C-G | 0.2611 | 0.1613 | 2.12E-02 | 1.838 | 0.210381967 |
| rs12483959 | rs2281138  | 6481  | 0.843 | chr22:44332477 | 22:44332477-T-C | 0.2611 | 0.1613 | 2.12E-02 | 1.838 | 0.210381967 |
| rs12483959 | rs2072907  | 6657  | 0.843 | chr22:44332653 | 22:44332653-C-G | 0.2611 | 0.1613 | 2.12E-02 | 1.838 | 0.210381967 |
| rs11090617 | rs2076207  | 6670  | 0.843 | chr22:44333370 | 22:44333370-A-G | 0.2611 | 0.1613 | 2.12E-02 | 1.838 | 0.210381967 |
| rs36069781 | rs2076207  | 6716  | 1     | chr22:44333370 | 22:44333370-A-G | 0.2611 | 0.1613 | 2.12E-02 | 1.838 | 0.210381967 |
| rs13056555 | rs2072907  | 6873  | 1     | chr22:44332653 | 22:44332653-C-G | 0.2611 | 0.1613 | 2.12E-02 | 1.838 | 0.210381967 |
| rs13056555 | rs2281138  | 7049  | 1     | chr22:44332477 | 22:44332477-T-C | 0.2611 | 0.1613 | 2.12E-02 | 1.838 | 0.210381967 |
| rs9625962  | rs2076207  | 7098  | 0.843 | chr22:44333370 | 22:44333370-A-G | 0.2611 | 0.1613 | 2.12E-02 | 1.838 | 0.210381967 |
| rs12483959 | rs2076207  | 7374  | 0.843 | chr22:44333370 | 22:44333370-A-G | 0.2611 | 0.1613 | 2.12E-02 | 1.838 | 0.210381967 |
| rs36069781 | rs2072907  | 7433  | 1     | chr22:44332653 | 22:44332653-C-G | 0.2611 | 0.1613 | 2.12E-02 | 1.838 | 0.210381967 |
| rs2294916  | rs2076207  | 7552  | 0.843 | chr22:44333370 | 22:44333370-A-G | 0.2611 | 0.1613 | 2.12E-02 | 1.838 | 0.210381967 |
| rs36069781 | rs2281138  | 7609  | 1     | chr22:44332477 | 22:44332477-T-C | 0.2611 | 0.1613 | 2.12E-02 | 1.838 | 0.210381967 |
| rs13056555 | rs13056638 | 7748  | 1     | chr22:44331778 | 22:44331778-C-G | 0.2611 | 0.1613 | 2.12E-02 | 1.838 | 0.210381967 |
| rs4823179  | rs2076207  | 7823  | 1     | chr22:44333370 | 22:44333370-A-G | 0.2611 | 0.1613 | 2.12E-02 | 1.838 | 0.210381967 |
| rs4823180  | rs2076207  | 7928  | 1     | chr22:44333370 | 22:44333370-A-G | 0.2611 | 0.1613 | 2.12E-02 | 1.838 | 0.210381967 |
| rs13056555 | rs1997693  | 8013  | 1     | chr22:44331513 | 22:44331513-C-G | 0.2611 | 0.1613 | 2.12E-02 | 1.838 | 0.210381967 |
| rs4823181  | rs2076207  | 8236  | 1     | chr22:44333370 | 22:44333370-A-G | 0.2611 | 0.1613 | 2.12E-02 | 1.838 | 0.210381967 |
| rs2294916  | rs2072907  | 8269  | 0.843 | chr22:44332653 | 22:44332653-C-G | 0.2611 | 0.1613 | 2.12E-02 | 1.838 | 0.210381967 |
| rs13055900 | rs2076207  | 8296  | 1     | chr22:44333370 | 22:44333370-A-G | 0.2611 | 0.1613 | 2.12E-02 | 1.838 | 0.210381967 |
| rs13055874 | rs2076207  | 8302  | 1     | chr22:44333370 | 22:44333370-A-G | 0.2611 | 0.1613 | 2.12E-02 | 1.838 | 0.210381967 |
| rs36069781 | rs13056638 | 8308  | 1     | chr22:44331778 | 22:44331778-C-G | 0.2611 | 0.1613 | 2.12E-02 | 1.838 | 0.210381967 |
| rs2294916  | rs2281138  | 8445  | 0.843 | chr22:44332477 | 22:44332477-T-C | 0.2611 | 0.1613 | 2.12E-02 | 1.838 | 0.210381967 |
| rs4823179  | rs2072907  | 8540  | 1     | chr22:44332653 | 22:44332653-C-G | 0.2611 | 0.1613 | 2.12E-02 | 1.838 | 0.210381967 |
| rs36069781 | rs1997693  | 8573  | 1     | chr22:44331513 | 22:44331513-C-G | 0.2611 | 0.1613 | 2.12E-02 | 1.838 | 0.210381967 |
| rs4823180  | rs2072907  | 8645  | 1     | chr22:44332653 | 22:44332653-C-G | 0.2611 | 0.1613 | 2.12E-02 | 1.838 | 0.210381967 |
| rs4823179  | rs2281138  | 8716  | 1     | chr22:44332477 | 22:44332477-T-C | 0.2611 | 0.1613 | 2.12E-02 | 1.838 | 0.210381967 |
| rs4823180  | rs2281138  | 8821  | 1     | chr22:44332477 | 22:44332477-T-C | 0.2611 | 0.1613 | 2.12E-02 | 1.838 | 0.210381967 |
| rs4823181  | rs2072907  | 8953  | 1     | chr22:44332653 | 22:44332653-C-G | 0.2611 | 0.1613 | 2.12E-02 | 1.838 | 0.210381967 |
| rs13055900 | rs2072907  | 9013  | 1     | chr22:44332653 | 22:44332653-C-G | 0.2611 | 0.1613 | 2.12E-02 | 1.838 | 0.210381967 |
| rs13055874 | rs2072907  | 9019  | 1     | chr22:44332653 | 22:44332653-C-G | 0.2611 | 0.1613 | 2.12E-02 | 1.838 | 0.210381967 |
| rs4823181  | rs2281138  | 9129  | 1     | chr22:44332477 | 22:44332477-T-C | 0.2611 | 0.1613 | 2.12E-02 | 1.838 | 0.210381967 |
| rs2294916  | rs13056638 | 9144  | 0.843 | chr22:44331778 | 22:44331778-C-G | 0.2611 | 0.1613 | 2.12E-02 | 1.838 | 0.210381967 |
| rs13055900 | rs2281138  | 9189  | 1     | chr22:44332477 | 22:44332477-T-C | 0.2611 | 0.1613 | 2.12E-02 | 1.838 | 0.210381967 |
| rs13055874 | rs2281138  | 9195  | 1     | chr22:44332477 | 22:44332477-T-C | 0.2611 | 0.1613 | 2.12E-02 | 1.838 | 0.210381967 |
| rs2294916  | rs1997693  | 9409  | 0.843 | chr22:44331513 | 22:44331513-C-G | 0.2611 | 0.1613 | 2.12E-02 | 1.838 | 0.210381967 |
| rs4823179  | rs13056638 | 9415  | 1     | chr22:44331778 | 22:44331778-C-G | 0.2611 | 0.1613 | 2.12E-02 | 1.838 | 0.210381967 |
| rs4823180  | rs13056638 | 9520  | 1     | chr22:44331778 | 22:44331778-C-G | 0.2611 | 0.1613 | 2.12E-02 | 1.838 | 0.210381967 |
| rs2008451  | rs2076207  | 9599  | 1     | chr22:44333370 | 22:44333370-A-G | 0.2611 | 0.1613 | 2.12E-02 | 1.838 | 0.210381967 |
| rs4823179  | rs1997693  | 9680  | 1     | chr22:44331513 | 22:44331513-C-G | 0.2611 | 0.1613 | 2.12E-02 | 1.838 | 0.210381967 |
| rs4823180  | rs1997693  | 9785  | 1     | chr22:44331513 | 22:44331513-C-G | 0.2611 | 0.1613 | 2.12E-02 | 1.838 | 0.210381967 |
| rs4823181  | rs13056638 | 9828  | 1     | chr22:44331778 | 22:44331778-C-G | 0.2611 | 0.1613 | 2.12E-02 | 1.838 | 0.210381967 |
| rs13055900 | rs13056638 | 9888  | 1     | chr22:44331778 | 22:44331778-C-G | 0.2611 | 0.1613 | 2.12E-02 | 1.838 | 0.210381967 |
| rs13055874 | rs13056638 | 9894  | 1     | chr22:44331778 | 22:44331778-C-G | 0.2611 | 0.1613 | 2.12E-02 | 1.838 | 0.210381967 |
| rs4823181  | rs1997693  | 10093 | 1     | chr22:44331513 | 22:44331513-C-G | 0.2611 | 0.1613 | 2.12E-02 | 1.838 | 0.210381967 |
| rs13055900 | rs1997693  | 10153 | 1     | chr22:44331513 | 22:44331513-C-G | 0.2611 | 0.1613 | 2.12E-02 | 1.838 | 0.210381967 |
| rs13055874 | rs1997693  | 10159 | 1     | chr22:44331513 | 22:44331513-C-G | 0.2611 | 0.1613 | 2.12E-02 | 1.838 | 0.210381967 |
| rs2008451  | rs2072907  | 10316 | 1     | chr22:44332653 | 22:44332653-C-G | 0.2611 | 0.1613 | 2.12E-02 | 1.838 | 0.210381967 |
| rs2008451  | rs2281138  | 10492 | 1     | chr22:44332477 | 22:44332477-T-C | 0.2611 | 0.1613 | 2.12E-02 | 1.838 | 0.210381967 |
| rs2008451  | rs13056638 | 11191 | 1     | chr22:44331778 | 22:44331778-C-G | 0.2611 | 0.1613 | 2.12E-02 | 1.838 | 0.210381967 |
| rs2008451  | rs1997693  | 11456 | 1     | chr22:44331513 | 22:44331513-C-G | 0.2611 | 0.1613 | 2.12E-02 | 1.838 | 0.210381967 |
| rs2092501  | rs2076207  | 13881 | 0.947 | chr22:44333370 | 22:44333370-A-G | 0.2611 | 0.1613 | 2.12E-02 | 1.838 | 0.210381967 |
| rs2092501  | rs2072907  | 14598 | 0.947 | chr22:44332653 | 22:44332653-C-G | 0.2611 | 0.1613 | 2.12E-02 | 1.838 | 0.210381967 |
| rs2092501  | rs2281138  | 14774 | 0.947 | chr22:44332477 | 22:44332477-T-C | 0.2611 | 0.1613 | 2.12E-02 | 1.838 | 0.210381967 |
| rs34912062 | rs2076207  | 15076 | 0.947 | chr22:44333370 | 22:44333370-A-G | 0.2611 | 0.1613 | 2.12E-02 | 1.838 | 0.210381967 |
| rs2092501  | rs13056638 | 15473 | 0.947 | chr22:44331778 | 22:44331778-C-G | 0.2611 | 0.1613 | 2.12E-02 | 1.838 | 0.210381967 |
| rs2092501  | rs1997693  | 15738 | 0.947 | chr22:44331513 | 22:44331513-C-G | 0.2611 | 0.1613 | 2.12E-02 | 1.838 | 0.210381967 |
| rs34912062 | rs2072907  | 15793 | 0.947 | chr22:44332653 | 22:44332653-C-G | 0.2611 | 0.1613 | 2.12E-02 | 1.838 | 0.210381967 |
| rs1474745  | rs2076207  | 15866 | 0.947 | chr22:44333370 | 22:44333370-A-G | 0.2611 | 0.1613 | 2.12E-02 | 1.838 | 0.210381967 |
| rs34912062 | rs2281138  | 15969 | 0.947 | chr22:44332477 | 22:44332477-T-C | 0.2611 | 0.1613 | 2.12E-02 | 1.838 | 0.210381967 |
| rs1474745  | rs2072907  | 16583 | 0.947 | chr22:44332653 | 22:44332653-C-G | 0.2611 | 0.1613 | 2.12E-02 | 1.838 | 0.210381967 |
| rs34912062 | rs13056638 | 16668 | 0.947 | chr22:44331778 | 22:44331778-C-G | 0.2611 | 0.1613 | 2.12E-02 | 1.838 | 0.210381967 |
| rs1474745  | rs2281138  | 16759 | 0.947 | chr22:44332477 | 22:44332477-T-C | 0.2611 | 0.1613 | 2.12E-02 | 1.838 | 0.210381967 |
| rs34912062 | rs1997693  | 16933 | 0.947 | chr22:44331513 | 22:44331513-C-G | 0.2611 | 0.1613 | 2.12E-02 | 1.838 | 0.210381967 |
| rs1474745  | rs13056638 | 17458 | 0.947 | chr22:44331778 | 22:44331778-C-G | 0.2611 | 0.1613 | 2.12E-02 | 1.838 | 0.210381967 |
| rs1474745  | rs1997693  | 17723 | 0.947 | chr22:44331513 | 22:44331513-C-G | 0.2611 | 0.1613 | 2.12E-02 | 1.838 | 0.210381967 |
| rs56373884 | rs2076207  | 23098 | 0.895 | chr22:44333370 | 22:44333370-A-G | 0.2611 | 0.1613 | 2.12E-02 | 1.838 | 0.210381967 |
| rs56373884 | rs2072907  | 23815 | 0.895 | chr22:44332653 | 22:44332653-C-G | 0.2611 | 0.1613 | 2.12E-02 | 1.838 | 0.210381967 |
| rs56373884 | rs2281138  | 23991 | 0.895 | chr22:44332477 | 22:44332477-T-C | 0.2611 | 0.1613 | 2.12E-02 | 1.838 | 0.210381967 |
| rs56373884 | rs13056638 | 24690 | 0.895 | chr22:44331778 | 22:44331778-C-G | 0.2611 | 0.1613 | 2.12E-02 | 1.838 | 0.210381967 |
| rs56373884 | rs1997693  | 24955 | 0.895 | chr22:44331513 | 22:44331513-C-G | 0.2611 | 0.1613 | 2.12E-02 | 1.838 | 0.210381967 |
| rs2294921  | rs2076207  | 28472 | 0.895 | chr22:44333370 | 22:44333370-A-G | 0.2611 | 0.1613 | 2.12E-02 | 1.838 | 0.210381967 |
| rs2294921  | rs2072907  | 29189 | 0.895 | chr22:44332653 | 22:44332653-C-G | 0.2611 | 0.1613 | 2.12E-02 | 1.838 | 0.210381967 |
| rs2294921  | rs2281138  | 29365 | 0.895 | chr22:44332477 | 22:44332477-T-C | 0.2611 | 0.1613 | 2.12E-02 | 1.838 | 0.210381967 |
| rs2294921  | rs1305     |       |       |                |                 |        |        |          |       |             |

|            |            |     |       |                |                 |        |        |          |       |             |
|------------|------------|-----|-------|----------------|-----------------|--------|--------|----------|-------|-------------|
| rs4823181  | rs4823181  | 0   | 1     | chr22:44341606 | 22:44341606-T-C | 0.2556 | 0.1613 | 2.88E-02 | 1.785 | 0.207677049 |
| rs926633   | rs926633   | 0   | 1     | chr22:44337533 | 22:44337533-G-A | 0.2556 | 0.1613 | 2.88E-02 | 1.785 | 0.207677049 |
| rs13055874 | rs13055900 | 6   | 1     | chr22:44341666 | 22:44341666-A-G | 0.2556 | 0.1613 | 2.88E-02 | 1.785 | 0.207677049 |
| rs13055900 | rs13055874 | 6   | 1     | chr22:44341672 | 22:44341672-T-C | 0.2556 | 0.1613 | 2.88E-02 | 1.785 | 0.207677049 |
| rs34352134 | rs35621602 | 10  | 1     | chr22:44335406 | 22:44335406-C-A | 0.2556 | 0.1613 | 2.88E-02 | 1.785 | 0.207677049 |
| rs2401512  | rs2896020  | 23  | 1     | chr22:44333968 | 22:44333968-T-C | 0.2556 | 0.1613 | 2.88E-02 | 1.785 | 0.207677049 |
| rs2896020  | rs2401512  | 23  | 1     | chr22:44333945 | 22:44333945-C-G | 0.2556 | 0.1613 | 2.88E-02 | 1.785 | 0.207677049 |
| rs13055900 | rs4823181  | 60  | 1     | chr22:44341606 | 22:44341606-T-C | 0.2556 | 0.1613 | 2.88E-02 | 1.785 | 0.207677049 |
| rs4823181  | rs13055900 | 60  | 1     | chr22:44341666 | 22:44341666-A-G | 0.2556 | 0.1613 | 2.88E-02 | 1.785 | 0.207677049 |
| rs13055874 | rs4823181  | 66  | 1     | chr22:44341606 | 22:44341606-T-C | 0.2556 | 0.1613 | 2.88E-02 | 1.785 | 0.207677049 |
| rs4823181  | rs13055874 | 66  | 1     | chr22:44341672 | 22:44341672-T-C | 0.2556 | 0.1613 | 2.88E-02 | 1.785 | 0.207677049 |
| rs16991175 | rs35621602 | 75  | 0.947 | chr22:44335406 | 22:44335406-C-A | 0.2556 | 0.1613 | 2.88E-02 | 1.785 | 0.207677049 |
| rs35621602 | rs16991175 | 75  | 0.947 | chr22:44335331 | 22:44335331-T-C | 0.2556 | 0.1613 | 2.88E-02 | 1.785 | 0.207677049 |
| rs2281137  | rs2281135  | 77  | 0.895 | chr22:44332570 | a_exm-rs2281135 | 0.2556 | 0.1613 | 2.88E-02 | 1.785 | 0.207677049 |
| rs2072907  | rs2281135  | 83  | 1     | chr22:44332570 | a_exm-rs2281135 | 0.2556 | 0.1613 | 2.88E-02 | 1.785 | 0.207677049 |
| rs34352134 | rs16991175 | 85  | 0.947 | chr22:44335331 | 22:44335331-T-C | 0.2556 | 0.1613 | 2.88E-02 | 1.785 | 0.207677049 |
| rs2281138  | rs2281135  | 93  | 1     | chr22:44332570 | a_exm-rs2281135 | 0.2556 | 0.1613 | 2.88E-02 | 1.785 | 0.207677049 |
| rs1883348  | rs1883349  | 128 | 1     | chr22:44331943 | 22:44331943-G-A | 0.2556 | 0.1613 | 2.88E-02 | 1.785 | 0.207677049 |
| rs13056638 | rs1883349  | 165 | 1     | chr22:44331943 | 22:44331943-G-A | 0.2556 | 0.1613 | 2.88E-02 | 1.785 | 0.207677049 |
| rs2076207  | rs2072906  | 198 | 1     | chr22:44333172 | 22:44333172-A-G | 0.2556 | 0.1613 | 2.88E-02 | 1.785 | 0.207677049 |
| rs1010022  | rs1010022  | 212 | 1     | chr22:44336310 | 22:44336310-A-G | 0.2556 | 0.1613 | 2.88E-02 | 1.785 | 0.207677049 |
| rs2072905  | rs2896019  | 215 | 1     | chr22:44333694 | a_rs2896019     | 0.2556 | 0.1613 | 2.88E-02 | 1.785 | 0.207677049 |
| rs2401512  | rs2896019  | 251 | 1     | chr22:44333694 | a_rs2896019     | 0.2556 | 0.1613 | 2.88E-02 | 1.785 | 0.207677049 |
| rs2896019  | rs2401512  | 251 | 1     | chr22:44333945 | 22:44333945-C-G | 0.2556 | 0.1613 | 2.88E-02 | 1.785 | 0.207677049 |
| rs4823179  | rs2294916  | 271 | 0.843 | chr22:44340922 | 22:44340922-T-G | 0.2556 | 0.1613 | 2.88E-02 | 1.785 | 0.207677049 |
| rs2896019  | rs2896020  | 274 | 1     | chr22:44333968 | 22:44333968-T-C | 0.2556 | 0.1613 | 2.88E-02 | 1.785 | 0.207677049 |
| rs2896020  | rs2896019  | 274 | 1     | chr22:44333694 | a_rs2896019     | 0.2556 | 0.1613 | 2.88E-02 | 1.785 | 0.207677049 |
| rs34879941 | rs2072906  | 294 | 1     | chr22:44333172 | 22:44333172-A-G | 0.2556 | 0.1613 | 2.88E-02 | 1.785 | 0.207677049 |
| rs2072905  | rs2072906  | 307 | 1     | chr22:44333172 | 22:44333172-A-G | 0.2556 | 0.1613 | 2.88E-02 | 1.785 | 0.207677049 |
| rs34879941 | rs2281135  | 308 | 1     | chr22:44332570 | a_exm-rs2281135 | 0.2556 | 0.1613 | 2.88E-02 | 1.785 | 0.207677049 |
| rs4823180  | rs4823181  | 308 | 1     | chr22:44341606 | 22:44341606-T-C | 0.2556 | 0.1613 | 2.88E-02 | 1.785 | 0.207677049 |
| rs2076207  | rs2896019  | 324 | 1     | chr22:44333694 | a_rs2896019     | 0.2556 | 0.1613 | 2.88E-02 | 1.785 | 0.207677049 |
| rs34352134 | rs2073081  | 328 | 1     | chr22:44335744 | 22:44335744-T-C | 0.2556 | 0.1613 | 2.88E-02 | 1.785 | 0.207677049 |
| rs2073081  | rs35621602 | 338 | 1     | chr22:44335406 | 22:44335406-C-A | 0.2556 | 0.1613 | 2.88E-02 | 1.785 | 0.207677049 |
| rs35621602 | rs2073081  | 338 | 1     | chr22:44335744 | 22:44335744-T-C | 0.2556 | 0.1613 | 2.88E-02 | 1.785 | 0.207677049 |
| rs1010023  | rs2073081  | 354 | 1     | chr22:44335744 | 22:44335744-T-C | 0.2556 | 0.1613 | 2.88E-02 | 1.785 | 0.207677049 |
| rs4823180  | rs13055900 | 368 | 1     | chr22:44341666 | 22:44341666-A-G | 0.2556 | 0.1613 | 2.88E-02 | 1.785 | 0.207677049 |
| rs4823180  | rs13055874 | 374 | 1     | chr22:44341672 | 22:44341672-T-C | 0.2556 | 0.1613 | 2.88E-02 | 1.785 | 0.207677049 |
| rs4823180  | rs2294916  | 376 | 0.843 | chr22:44340922 | 22:44340922-T-G | 0.2556 | 0.1613 | 2.88E-02 | 1.785 | 0.207677049 |
| rs16991175 | rs2073081  | 413 | 0.947 | chr22:44335744 | 22:44335744-T-C | 0.2556 | 0.1613 | 2.88E-02 | 1.785 | 0.207677049 |
| rs2073081  | rs16991175 | 413 | 0.947 | chr22:44335331 | 22:44335331-T-C | 0.2556 | 0.1613 | 2.88E-02 | 1.785 | 0.207677049 |
| rs4823179  | rs4823181  | 413 | 1     | chr22:44341606 | 22:44341606-T-C | 0.2556 | 0.1613 | 2.88E-02 | 1.785 | 0.207677049 |
| rs1997693  | rs1883349  | 430 | 1     | chr22:44331943 | 22:44331943-G-A | 0.2556 | 0.1613 | 2.88E-02 | 1.785 | 0.207677049 |
| rs2072905  | rs2401512  | 466 | 1     | chr22:44333945 | 22:44333945-C-G | 0.2556 | 0.1613 | 2.88E-02 | 1.785 | 0.207677049 |
| rs4823179  | rs13055900 | 473 | 1     | chr22:44341666 | 22:44341666-A-G | 0.2556 | 0.1613 | 2.88E-02 | 1.785 | 0.207677049 |
| rs4823179  | rs13055874 | 479 | 1     | chr22:44341672 | 22:44341672-T-C | 0.2556 | 0.1613 | 2.88E-02 | 1.785 | 0.207677049 |
| rs2072905  | rs2896020  | 489 | 1     | chr22:44333968 | 22:44333968-T-C | 0.2556 | 0.1613 | 2.88E-02 | 1.785 | 0.207677049 |
| rs4823176  | rs2896020  | 508 | 0.947 | chr22:44333968 | 22:44333968-T-C | 0.2556 | 0.1613 | 2.88E-02 | 1.785 | 0.207677049 |
| rs4823177  | rs2896020  | 518 | 0.947 | chr22:44333968 | 22:44333968-T-C | 0.2556 | 0.1613 | 2.88E-02 | 1.785 | 0.207677049 |
| rs2072907  | rs2072906  | 519 | 1     | chr22:44333172 | 22:44333172-A-G | 0.2556 | 0.1613 | 2.88E-02 | 1.785 | 0.207677049 |
| rs2072906  | rs2896019  | 522 | 1     | chr22:44333694 | a_rs2896019     | 0.2556 | 0.1613 | 2.88E-02 | 1.785 | 0.207677049 |
| rs2896019  | rs2072906  | 522 | 1     | chr22:44333172 | 22:44333172-A-G | 0.2556 | 0.1613 | 2.88E-02 | 1.785 | 0.207677049 |
| rs4823176  | rs2401512  | 531 | 0.947 | chr22:44333945 | 22:44333945-C-G | 0.2556 | 0.1613 | 2.88E-02 | 1.785 | 0.207677049 |
| rs2281138  | rs1883349  | 534 | 1     | chr22:44331943 | 22:44331943-G-A | 0.2556 | 0.1613 | 2.88E-02 | 1.785 | 0.207677049 |
| rs4823177  | rs2401512  | 541 | 0.947 | chr22:44333945 | 22:44333945-C-G | 0.2556 | 0.1613 | 2.88E-02 | 1.785 | 0.207677049 |
| rs2281137  | rs1883349  | 550 | 0.895 | chr22:44331943 | 22:44331943-G-A | 0.2556 | 0.1613 | 2.88E-02 | 1.785 | 0.207677049 |
| rs13056555 | rs36069781 | 560 | 1     | chr22:44340086 | 22:44340086-T   | 0.2556 | 0.1613 | 2.88E-02 | 1.785 | 0.207677049 |
| rs36069781 | rs13056555 | 560 | 1     | chr22:44339526 | 22:44339526-C-G | 0.2556 | 0.1613 | 2.88E-02 | 1.785 | 0.207677049 |
| rs4823178  | rs2896020  | 561 | 0.947 | chr22:44333968 | 22:44333968-T-C | 0.2556 | 0.1613 | 2.88E-02 | 1.785 | 0.207677049 |
| rs1010022  | rs2073081  | 566 | 1     | chr22:44335744 | 22:44335744-T-C | 0.2556 | 0.1613 | 2.88E-02 | 1.785 | 0.207677049 |
| rs2073081  | rs1010022  | 566 | 1     | chr22:44336310 | 22:44336310-A-G | 0.2556 | 0.1613 | 2.88E-02 | 1.785 | 0.207677049 |
| rs2076207  | rs2401512  | 575 | 1     | chr22:44333945 | 22:44333945-C-G | 0.2556 | 0.1613 | 2.88E-02 | 1.785 | 0.207677049 |
| rs73176497 | rs926633   | 576 | 1     | chr22:44337533 | 22:44337533-G-A | 0.2556 | 0.1613 | 2.88E-02 | 1.785 | 0.207677049 |
| rs4823178  | rs2401512  | 584 | 0.947 | chr22:44333945 | 22:44333945-C-G | 0.2556 | 0.1613 | 2.88E-02 | 1.785 | 0.207677049 |
| rs2076207  | rs2896020  | 598 | 1     | chr22:44333968 | 22:44333968-T-C | 0.2556 | 0.1613 | 2.88E-02 | 1.785 | 0.207677049 |
| rs2072906  | rs2281135  | 602 | 1     | chr22:44332570 | a_exm-rs2281135 | 0.2556 | 0.1613 | 2.88E-02 | 1.785 | 0.207677049 |
| rs2281135  | rs2072906  | 602 | 1     | chr22:44333172 | 22:44333172-A-G | 0.2556 | 0.1613 | 2.88E-02 | 1.785 | 0.207677049 |
| rs1883349  | rs2281135  | 627 | 1     | chr22:44332570 | a_exm-rs2281135 | 0.2556 | 0.1613 | 2.88E-02 | 1.785 | 0.207677049 |
| rs2281135  | rs1883349  | 627 | 1     | chr22:44331943 | 22:44331943-G-A | 0.2556 | 0.1613 | 2.88E-02 | 1.785 | 0.207677049 |
| rs73176497 | rs1010022  | 647 | 1     | chr22:44336310 | 22:44336310-A-G | 0.2556 | 0.1613 | 2.88E-02 | 1.785 | 0.207677049 |
| rs2281137  | rs2072906  | 679 | 0.895 | chr22:44333172 | 22:44333172-A-G | 0.2556 | 0.1613 | 2.88E-02 | 1.785 | 0.207677049 |
| rs2294916  | rs4823181  | 684 | 0.843 | chr22:44341606 | 22:44341606-T-C | 0.2556 | 0.1613 | 2.88E-02 | 1.785 | 0.207677049 |
| rs4823181  | rs2294916  | 684 | 0.843 | chr22:44340922 | 22:44340922-T-G | 0.2556 | 0.1613 | 2.88E-02 | 1.785 | 0.207677049 |
| rs1010023  | rs35621602 | 692 | 1     | chr22:44335406 | 22:44335406-C-A | 0.2556 | 0.1613 | 2.88E-02 | 1.785 | 0.207677049 |
| rs2281138  | rs2072906  | 695 | 1     | chr22:44333172 | 22:44333172-A-G | 0.2556 | 0.1613 | 2.88E-02 | 1.785 | 0.207677049 |
| rs2072907  | rs1883349  | 710 | 1     | chr22:44331943 | 22:44331943-G-A | 0.2556 | 0.1613 | 2.88E-02 | 1.785 | 0.207677049 |
| rs13055900 | rs2294916  | 744 | 0.843 | chr22:44340922 | 22:44340922-T-G | 0.2556 | 0.1613 | 2.88E-02 | 1.785 | 0.207677049 |
| rs2294916  | rs13055900 | 744 | 0.843 | chr22:44341666 | 22:44341666-A-G | 0.2556 | 0.1613 | 2.88E-02 | 1.785 | 0.207677049 |
| rs13055874 | rs2294916  | 750 | 0.843 | chr22:44340922 | 22:44340922-T-G | 0.2556 | 0.1613 | 2.88E-02 | 1.785 | 0.207677049 |
| rs2294916  | rs13055874 | 750 | 0.843 | chr22:44341672 | 22:44341672-T-C | 0.2556 | 0.1613 | 2.88E-02 | 1.785 | 0.207677049 |
| rs1883348  | rs2281135  | 755 | 1     | chr22:44332570 | a_exm-rs2281135 | 0.2556 | 0.1613 | 2.88E-02 | 1.785 | 0.207677049 |
| rs1010023  | rs16991175 | 767 | 0.947 | chr22:44335331 | 22:44335331-T-C | 0.2556 | 0.1613 | 2.88E-02 | 1.785 | 0.207677049 |
| rs2072906  | rs2401512  | 773 | 1     | chr22:44333945 | 22:44333945-C-G | 0.2556 | 0.1613 | 2.88E-02 | 1.785 | 0.207677049 |
| rs2401512  | rs2072906  | 773 | 1     | chr22:44333172 | 22:44333172-A-G | 0.2556 | 0.1613 | 2.88E-02 | 1.785 | 0.207677049 |
| rs4823176  | rs2896019  | 782 | 0.947 | chr22:44333694 | a_rs2896019     | 0.2556 | 0.1613 | 2.88E-02 | 1.785 | 0.207677049 |
| rs13056638 | rs2281135  | 792 | 1     | chr22:44332570 | a_exm-rs2281135 | 0.2556 | 0.1613 | 2.88E-02 | 1.785 | 0.207677049 |
| rs4823177  | rs2896019  | 792 | 0.947 | chr22:44333694 | a_rs2896019     | 0.2556 | 0.1613 | 2.88E-02 | 1.785 | 0.207677049 |
| rs2072906  |            |     |       |                |                 |        |        |          |       |             |

|            |            |      |       |                |                 |        |        |          |       |             |
|------------|------------|------|-------|----------------|-----------------|--------|--------|----------|-------|-------------|
| rs2072907  | rs2896019  | 1041 | 1     | chr22:44333694 | a_rs2896019     | 0.2556 | 0.1613 | 2.88E-02 | 1.785 | 0.207677049 |
| rs1997693  | rs2281135  | 1057 | 1     | chr22:44332570 | a_exm-rs2281135 | 0.2556 | 0.1613 | 2.88E-02 | 1.785 | 0.207677049 |
| rs34879941 | rs2401512  | 1067 | 1     | chr22:44333945 | 22:44333945-C-G | 0.2556 | 0.1613 | 2.88E-02 | 1.785 | 0.207677049 |
| rs34879941 | rs2896020  | 1090 | 1     | chr22:44333968 | 22:44333968-T-C | 0.2556 | 0.1613 | 2.88E-02 | 1.785 | 0.207677049 |
| rs4823179  | rs36069781 | 1107 | 1     | chr22:44340086 | 22:44340086-C-T | 0.2556 | 0.1613 | 2.88E-02 | 1.785 | 0.207677049 |
| rs2281135  | rs2896019  | 1124 | 1     | chr22:44333694 | a_rs2896019     | 0.2556 | 0.1613 | 2.88E-02 | 1.785 | 0.207677049 |
| rs2896019  | rs2281135  | 1124 | 1     | chr22:44332570 | a_exm-rs2281135 | 0.2556 | 0.1613 | 2.88E-02 | 1.785 | 0.207677049 |
| rs2281137  | rs2896019  | 1201 | 0.895 | chr22:44333694 | a_rs2896019     | 0.2556 | 0.1613 | 2.88E-02 | 1.785 | 0.207677049 |
| rs4823180  | rs36069781 | 1212 | 1     | chr22:44340086 | 22:44340086-C-T | 0.2556 | 0.1613 | 2.88E-02 | 1.785 | 0.207677049 |
| rs73176497 | rs2073081  | 1213 | 1     | chr22:44335744 | 22:44335744-T-C | 0.2556 | 0.1613 | 2.88E-02 | 1.785 | 0.207677049 |
| rs4823178  | rs2073081  | 1215 | 0.947 | chr22:44335744 | 22:44335744-T-C | 0.2556 | 0.1613 | 2.88E-02 | 1.785 | 0.207677049 |
| rs2281138  | rs2896019  | 1217 | 1     | chr22:44333694 | a_rs2896019     | 0.2556 | 0.1613 | 2.88E-02 | 1.785 | 0.207677049 |
| rs1010022  | rs926633   | 1223 | 1     | chr22:44337533 | 22:44337533-G-A | 0.2556 | 0.1613 | 2.88E-02 | 1.785 | 0.207677049 |
| rs926633   | rs1010022  | 1223 | 1     | chr22:44336310 | 22:44336310-A-G | 0.2556 | 0.1613 | 2.88E-02 | 1.785 | 0.207677049 |
| rs1883349  | rs2072906  | 1229 | 1     | chr22:44333172 | 22:44333172-A-G | 0.2556 | 0.1613 | 2.88E-02 | 1.785 | 0.207677049 |
| rs2072906  | rs1883349  | 1229 | 1     | chr22:44331943 | 22:44331943-G-A | 0.2556 | 0.1613 | 2.88E-02 | 1.785 | 0.207677049 |
| rs4823177  | rs2073081  | 1258 | 0.947 | chr22:44335744 | 22:44335744-T-C | 0.2556 | 0.1613 | 2.88E-02 | 1.785 | 0.207677049 |
| rs4823176  | rs2073081  | 1268 | 0.947 | chr22:44335744 | 22:44335744-T-C | 0.2556 | 0.1613 | 2.88E-02 | 1.785 | 0.207677049 |
| rs2072907  | rs2401512  | 1292 | 1     | chr22:44333945 | 22:44333945-C-G | 0.2556 | 0.1613 | 2.88E-02 | 1.785 | 0.207677049 |
| rs2008451  | rs13055874 | 1297 | 1     | chr22:44341672 | 22:44341672-T-C | 0.2556 | 0.1613 | 2.88E-02 | 1.785 | 0.207677049 |
| rs2008451  | rs13055900 | 1303 | 1     | chr22:44341666 | 22:44341666-A-G | 0.2556 | 0.1613 | 2.88E-02 | 1.785 | 0.207677049 |
| rs4823176  | rs2072906  | 1304 | 0.947 | chr22:44333172 | 22:44333172-A-G | 0.2556 | 0.1613 | 2.88E-02 | 1.785 | 0.207677049 |
| rs4823177  | rs2072906  | 1314 | 0.947 | chr22:44333172 | 22:44333172-A-G | 0.2556 | 0.1613 | 2.88E-02 | 1.785 | 0.207677049 |
| rs2072907  | rs2896020  | 1315 | 1     | chr22:44333968 | 22:44333968-T-C | 0.2556 | 0.1613 | 2.88E-02 | 1.785 | 0.207677049 |
| rs1883348  | rs2072906  | 1357 | 1     | chr22:44333172 | 22:44333172-A-G | 0.2556 | 0.1613 | 2.88E-02 | 1.785 | 0.207677049 |
| rs4823178  | rs2072906  | 1357 | 0.947 | chr22:44333172 | 22:44333172-A-G | 0.2556 | 0.1613 | 2.88E-02 | 1.785 | 0.207677049 |
| rs16991175 | rs2896020  | 1363 | 0.947 | chr22:44333968 | 22:44333968-T-C | 0.2556 | 0.1613 | 2.88E-02 | 1.785 | 0.207677049 |
| rs2008451  | rs4823181  | 1363 | 1     | chr22:44341606 | 22:44341606-T-C | 0.2556 | 0.1613 | 2.88E-02 | 1.785 | 0.207677049 |
| rs2896020  | rs16991175 | 1363 | 0.947 | chr22:44335331 | 22:44335331-T-C | 0.2556 | 0.1613 | 2.88E-02 | 1.785 | 0.207677049 |
| rs2281135  | rs2401512  | 1375 | 1     | chr22:44333945 | 22:44333945-C-G | 0.2556 | 0.1613 | 2.88E-02 | 1.785 | 0.207677049 |
| rs2401512  | rs2281135  | 1375 | 1     | chr22:44332570 | a_exm-rs2281135 | 0.2556 | 0.1613 | 2.88E-02 | 1.785 | 0.207677049 |
| rs16991175 | rs2401512  | 1386 | 0.947 | chr22:44333945 | 22:44333945-C-G | 0.2556 | 0.1613 | 2.88E-02 | 1.785 | 0.207677049 |
| rs2401512  | rs16991175 | 1386 | 0.947 | chr22:44335331 | 22:44335331-T-C | 0.2556 | 0.1613 | 2.88E-02 | 1.785 | 0.207677049 |
| rs13056638 | rs2072906  | 1394 | 1     | chr22:44333172 | 22:44333172-A-G | 0.2556 | 0.1613 | 2.88E-02 | 1.785 | 0.207677049 |
| rs13056555 | rs2294916  | 1396 | 0.843 | chr22:44340922 | 22:44340922-T-G | 0.2556 | 0.1613 | 2.88E-02 | 1.785 | 0.207677049 |
| rs2294916  | rs13056555 | 1396 | 0.843 | chr22:44339526 | 22:44339526-C-G | 0.2556 | 0.1613 | 2.88E-02 | 1.785 | 0.207677049 |
| rs2281135  | rs2896020  | 1398 | 1     | chr22:44333968 | 22:44333968-T-C | 0.2556 | 0.1613 | 2.88E-02 | 1.785 | 0.207677049 |
| rs2896020  | rs2281135  | 1398 | 1     | chr22:44332570 | a_exm-rs2281135 | 0.2556 | 0.1613 | 2.88E-02 | 1.785 | 0.207677049 |
| rs2076207  | rs1883349  | 1427 | 1     | chr22:44331943 | 22:44331943-G-A | 0.2556 | 0.1613 | 2.88E-02 | 1.785 | 0.207677049 |
| rs1010023  | rs926633   | 1435 | 1     | chr22:44337533 | 22:44337533-G-A | 0.2556 | 0.1613 | 2.88E-02 | 1.785 | 0.207677049 |
| rs2896020  | rs35621602 | 1438 | 1     | chr22:44335406 | 22:44335406-C-A | 0.2556 | 0.1613 | 2.88E-02 | 1.785 | 0.207677049 |
| rs35621602 | rs2896020  | 1438 | 1     | chr22:44333968 | 22:44333968-T-C | 0.2556 | 0.1613 | 2.88E-02 | 1.785 | 0.207677049 |
| rs34352134 | rs2896020  | 1448 | 1     | chr22:44333968 | 22:44333968-T-C | 0.2556 | 0.1613 | 2.88E-02 | 1.785 | 0.207677049 |
| rs2281137  | rs2401512  | 1452 | 0.895 | chr22:44333945 | 22:44333945-C-G | 0.2556 | 0.1613 | 2.88E-02 | 1.785 | 0.207677049 |
| rs2401512  | rs35621602 | 1461 | 1     | chr22:44335406 | 22:44335406-C-A | 0.2556 | 0.1613 | 2.88E-02 | 1.785 | 0.207677049 |
| rs35621602 | rs2401512  | 1461 | 1     | chr22:44333945 | 22:44333945-C-G | 0.2556 | 0.1613 | 2.88E-02 | 1.785 | 0.207677049 |
| rs2281138  | rs2401512  | 1468 | 1     | chr22:44333945 | 22:44333945-C-G | 0.2556 | 0.1613 | 2.88E-02 | 1.785 | 0.207677049 |
| rs34352134 | rs2401512  | 1471 | 1     | chr22:44333945 | 22:44333945-C-G | 0.2556 | 0.1613 | 2.88E-02 | 1.785 | 0.207677049 |
| rs2281137  | rs2896020  | 1475 | 0.895 | chr22:44333968 | 22:44333968-T-C | 0.2556 | 0.1613 | 2.88E-02 | 1.785 | 0.207677049 |
| rs2281138  | rs2896020  | 1491 | 1     | chr22:44333968 | 22:44333968-T-C | 0.2556 | 0.1613 | 2.88E-02 | 1.785 | 0.207677049 |
| rs36069781 | rs4823181  | 1520 | 1     | chr22:44341606 | 22:44341606-T-C | 0.2556 | 0.1613 | 2.88E-02 | 1.785 | 0.207677049 |
| rs4823181  | rs36069781 | 1520 | 1     | chr22:44340086 | 22:44340086-C-T | 0.2556 | 0.1613 | 2.88E-02 | 1.785 | 0.207677049 |
| rs2072905  | rs1883349  | 1536 | 1     | chr22:44331943 | 22:44331943-G-A | 0.2556 | 0.1613 | 2.88E-02 | 1.785 | 0.207677049 |
| rs73176497 | rs35621602 | 1551 | 1     | chr22:44335406 | 22:44335406-C-A | 0.2556 | 0.1613 | 2.88E-02 | 1.785 | 0.207677049 |
| rs13055900 | rs36069781 | 1580 | 1     | chr22:44340086 | 22:44340086-C-T | 0.2556 | 0.1613 | 2.88E-02 | 1.785 | 0.207677049 |
| rs36069781 | rs13055900 | 1580 | 1     | chr22:44341666 | 22:44341666-A-G | 0.2556 | 0.1613 | 2.88E-02 | 1.785 | 0.207677049 |
| rs13055874 | rs36069781 | 1586 | 1     | chr22:44340086 | 22:44340086-C-T | 0.2556 | 0.1613 | 2.88E-02 | 1.785 | 0.207677049 |
| rs36069781 | rs13055874 | 1586 | 1     | chr22:44341672 | 22:44341672-T-C | 0.2556 | 0.1613 | 2.88E-02 | 1.785 | 0.207677049 |
| rs73176497 | rs16991175 | 1626 | 0.947 | chr22:44335331 | 22:44335331-T-C | 0.2556 | 0.1613 | 2.88E-02 | 1.785 | 0.207677049 |
| rs16991175 | rs2896019  | 1637 | 0.947 | chr22:44333694 | a_rs2896019     | 0.2556 | 0.1613 | 2.88E-02 | 1.785 | 0.207677049 |
| rs2896019  | rs16991175 | 1637 | 0.947 | chr22:44335331 | 22:44335331-T-C | 0.2556 | 0.1613 | 2.88E-02 | 1.785 | 0.207677049 |
| rs1997693  | rs2072906  | 1659 | 1     | chr22:44333172 | 22:44333172-A-G | 0.2556 | 0.1613 | 2.88E-02 | 1.785 | 0.207677049 |
| rs4823179  | rs13056555 | 1667 | 1     | chr22:44339526 | 22:44339526-C-G | 0.2556 | 0.1613 | 2.88E-02 | 1.785 | 0.207677049 |
| rs2896019  | rs35621602 | 1712 | 1     | chr22:44335406 | 22:44335406-C-A | 0.2556 | 0.1613 | 2.88E-02 | 1.785 | 0.207677049 |
| rs35621602 | rs2896019  | 1712 | 1     | chr22:44333694 | a_rs2896019     | 0.2556 | 0.1613 | 2.88E-02 | 1.785 | 0.207677049 |
| rs34352134 | rs2896019  | 1722 | 1     | chr22:44333694 | a_rs2896019     | 0.2556 | 0.1613 | 2.88E-02 | 1.785 | 0.207677049 |
| rs1883349  | rs2896019  | 1751 | 1     | chr22:44333694 | a_rs2896019     | 0.2556 | 0.1613 | 2.88E-02 | 1.785 | 0.207677049 |
| rs2896019  | rs1883349  | 1751 | 1     | chr22:44331943 | 22:44331943-G-A | 0.2556 | 0.1613 | 2.88E-02 | 1.785 | 0.207677049 |
| rs4823180  | rs13056555 | 1772 | 1     | chr22:44339526 | 22:44339526-C-G | 0.2556 | 0.1613 | 2.88E-02 | 1.785 | 0.207677049 |
| rs2073081  | rs2896020  | 1776 | 1     | chr22:44333968 | 22:44333968-T-C | 0.2556 | 0.1613 | 2.88E-02 | 1.785 | 0.207677049 |
| rs2896020  | rs2073081  | 1776 | 1     | chr22:44335744 | 22:44335744-T-C | 0.2556 | 0.1613 | 2.88E-02 | 1.785 | 0.207677049 |
| rs4823178  | rs1010022  | 1781 | 0.947 | chr22:44336310 | 22:44336310-A-G | 0.2556 | 0.1613 | 2.88E-02 | 1.785 | 0.207677049 |
| rs2073081  | rs926633   | 1789 | 1     | chr22:44337533 | 22:44337533-G-A | 0.2556 | 0.1613 | 2.88E-02 | 1.785 | 0.207677049 |
| rs926633   | rs2073081  | 1789 | 1     | chr22:44335744 | 22:44335744-T-C | 0.2556 | 0.1613 | 2.88E-02 | 1.785 | 0.207677049 |
| rs2073081  | rs2401512  | 1799 | 1     | chr22:44333945 | 22:44333945-C-G | 0.2556 | 0.1613 | 2.88E-02 | 1.785 | 0.207677049 |
| rs2401512  | rs2073081  | 1799 | 1     | chr22:44335744 | 22:44335744-T-C | 0.2556 | 0.1613 | 2.88E-02 | 1.785 | 0.207677049 |
| rs19717081 | rs1883349  | 1815 | 0.843 | chr22:44331943 | 22:44331943-G-A | 0.2556 | 0.1613 | 2.88E-02 | 1.785 | 0.207677049 |
| rs4823177  | rs1010022  | 1824 | 0.947 | chr22:44336310 | 22:44336310-A-G | 0.2556 | 0.1613 | 2.88E-02 | 1.785 | 0.207677049 |
| rs4823176  | rs1010022  | 1834 | 0.947 | chr22:44336310 | 22:44336310-A-G | 0.2556 | 0.1613 | 2.88E-02 | 1.785 | 0.207677049 |
| rs2072905  | rs16991175 | 1852 | 0.947 | chr22:44335331 | 22:44335331-T-C | 0.2556 | 0.1613 | 2.88E-02 | 1.785 | 0.207677049 |
| rs1883348  | rs2896019  | 1879 | 1     | chr22:44333694 | a_rs2896019     | 0.2556 | 0.1613 | 2.88E-02 | 1.785 | 0.207677049 |
| rs4823176  | rs2281135  | 1906 | 0.947 | chr22:44332570 | a_exm-rs2281135 | 0.2556 | 0.1613 | 2.88E-02 | 1.785 | 0.207677049 |
| rs13056638 | rs2896019  | 1916 | 1     | chr22:44333694 | a_rs2896019     | 0.2556 | 0.1613 | 2.88E-02 | 1.785 | 0.207677049 |
| rs4823177  | rs2281135  | 1916 | 0.947 | chr22:44332570 | a_exm-rs2281135 | 0.2556 | 0.1613 | 2.88E-02 | 1.785 | 0.207677049 |
| rs2072905  | rs35621602 | 1927 | 1     | chr22:44335406 | 22:44335406-C-A | 0.2556 | 0.1613 | 2.88E-02 | 1.785 | 0.207677049 |
| rs4823178  | rs2281135  | 1959 | 0.947 | chr22:44332570 | a_exm-rs2281135 | 0.2556 | 0.1613 | 2.88E-02 | 1.785 | 0.207677049 |
| rs2076207  | rs16991175 | 1961 | 0.947 | chr22:         |                 |        |        |          |       |             |

|            |            |      |       |                |                 |        |        |          |       |             |
|------------|------------|------|-------|----------------|-----------------|--------|--------|----------|-------|-------------|
| rs13056555 | rs13055874 | 2146 | 1     | chr22:44341672 | 22:44341672-T-C | 0.2556 | 0.1613 | 2.88E-02 | 1.785 | 0.207677049 |
| rs1010023  | rs2401512  | 2153 | 1     | chr22:44333945 | 22:44333945-C-G | 0.2556 | 0.1613 | 2.88E-02 | 1.785 | 0.207677049 |
| rs1883348  | rs2896020  | 2153 | 1     | chr22:44333968 | 22:44333968-T-C | 0.2556 | 0.1613 | 2.88E-02 | 1.785 | 0.207677049 |
| rs16991175 | rs2072906  | 2159 | 0.947 | chr22:44333172 | 22:44333172-A-G | 0.2556 | 0.1613 | 2.88E-02 | 1.785 | 0.207677049 |
| rs2072906  | rs16991175 | 2159 | 0.947 | chr22:44335331 | 22:44335331-T-C | 0.2556 | 0.1613 | 2.88E-02 | 1.785 | 0.207677049 |
| rs13056638 | rs2401512  | 2167 | 1     | chr22:44333945 | 22:44333945-C-G | 0.2556 | 0.1613 | 2.88E-02 | 1.785 | 0.207677049 |
| rs1997693  | rs2896019  | 2181 | 1     | chr22:44333694 | a rs2896019     | 0.2556 | 0.1613 | 2.88E-02 | 1.785 | 0.207677049 |
| rs13056638 | rs2896020  | 2190 | 1     | chr22:44333968 | 22:44333968-T-C | 0.2556 | 0.1613 | 2.88E-02 | 1.785 | 0.207677049 |
| rs16991175 | rs926633   | 2202 | 0.947 | chr22:44337533 | 22:44337533-G-A | 0.2556 | 0.1613 | 2.88E-02 | 1.785 | 0.207677049 |
| rs926633   | rs16991175 | 2202 | 0.947 | chr22:44335331 | 22:44335331-T-C | 0.2556 | 0.1613 | 2.88E-02 | 1.785 | 0.207677049 |
| rs2072906  | rs35621602 | 2234 | 1     | chr22:44335406 | 22:44335406-C-A | 0.2556 | 0.1613 | 2.88E-02 | 1.785 | 0.207677049 |
| rs35621602 | rs2072906  | 2234 | 1     | chr22:44333172 | 22:44333172-A-G | 0.2556 | 0.1613 | 2.88E-02 | 1.785 | 0.207677049 |
| rs34352134 | rs2072906  | 2244 | 1     | chr22:44333172 | 22:44333172-A-G | 0.2556 | 0.1613 | 2.88E-02 | 1.785 | 0.207677049 |
| rs2072905  | rs2073081  | 2265 | 1     | chr22:44335744 | 22:44335744-T-C | 0.2556 | 0.1613 | 2.88E-02 | 1.785 | 0.207677049 |
| rs1010022  | rs2896020  | 2342 | 1     | chr22:44333968 | 22:44333968-T-C | 0.2556 | 0.1613 | 2.88E-02 | 1.785 | 0.207677049 |
| rs2896020  | rs1010022  | 2342 | 1     | chr22:44336310 | 22:44336310-A-G | 0.2556 | 0.1613 | 2.88E-02 | 1.785 | 0.207677049 |
| rs1010022  | rs2401512  | 2365 | 1     | chr22:44333945 | 22:44333945-C-G | 0.2556 | 0.1613 | 2.88E-02 | 1.785 | 0.207677049 |
| rs2401512  | rs1010022  | 2365 | 1     | chr22:44336310 | 22:44336310-A-G | 0.2556 | 0.1613 | 2.88E-02 | 1.785 | 0.207677049 |
| rs2072607  | rs2073081  | 2374 | 1     | chr22:44335744 | 22:44335744-T-C | 0.2556 | 0.1613 | 2.88E-02 | 1.785 | 0.207677049 |
| rs1010023  | rs2896019  | 2404 | 1     | chr22:44333694 | a rs2896019     | 0.2556 | 0.1613 | 2.88E-02 | 1.785 | 0.207677049 |
| rs1997693  | rs2401512  | 2432 | 1     | chr22:44333945 | 22:44333945-C-G | 0.2556 | 0.1613 | 2.88E-02 | 1.785 | 0.207677049 |
| rs1977081  | rs2281135  | 2442 | 0.843 | chr22:44332570 | a exm-rs2281135 | 0.2556 | 0.1613 | 2.88E-02 | 1.785 | 0.207677049 |
| rs34879941 | rs16991175 | 2453 | 0.947 | chr22:44335331 | 22:44335331-T-C | 0.2556 | 0.1613 | 2.88E-02 | 1.785 | 0.207677049 |
| rs1997693  | rs2896020  | 2455 | 1     | chr22:44333968 | 22:44333968-T-C | 0.2556 | 0.1613 | 2.88E-02 | 1.785 | 0.207677049 |
| rs34879941 | rs35621602 | 2528 | 1     | chr22:44335406 | 22:44335406-C-A | 0.2556 | 0.1613 | 2.88E-02 | 1.785 | 0.207677049 |
| rs4823176  | rs1883349  | 2533 | 0.947 | chr22:44331943 | 22:44331943-G-A | 0.2556 | 0.1613 | 2.88E-02 | 1.785 | 0.207677049 |
| rs4823177  | rs1883349  | 2543 | 0.947 | chr22:44331943 | 22:44331943-G-A | 0.2556 | 0.1613 | 2.88E-02 | 1.785 | 0.207677049 |
| rs36069781 | rs926633   | 2553 | 1     | chr22:44337533 | 22:44337533-G-A | 0.2556 | 0.1613 | 2.88E-02 | 1.785 | 0.207677049 |
| rs926633   | rs36069781 | 2553 | 1     | chr22:44340086 | 22:44340086-C-T | 0.2556 | 0.1613 | 2.88E-02 | 1.785 | 0.207677049 |
| rs73176497 | rs13056555 | 2569 | 1     | chr22:44339526 | 22:44339526-C-G | 0.2556 | 0.1613 | 2.88E-02 | 1.785 | 0.207677049 |
| rs2072906  | rs2073081  | 2572 | 1     | chr22:44335744 | 22:44335744-T-C | 0.2556 | 0.1613 | 2.88E-02 | 1.785 | 0.207677049 |
| rs2073081  | rs2072906  | 2572 | 1     | chr22:44333172 | 22:44333172-A-G | 0.2556 | 0.1613 | 2.88E-02 | 1.785 | 0.207677049 |
| rs4823178  | rs1883349  | 2586 | 0.947 | chr22:44331943 | 22:44331943-G-A | 0.2556 | 0.1613 | 2.88E-02 | 1.785 | 0.207677049 |
| rs1010022  | rs2896019  | 2616 | 1     | chr22:44333694 | a rs2896019     | 0.2556 | 0.1613 | 2.88E-02 | 1.785 | 0.207677049 |
| rs2896019  | rs1010022  | 2616 | 1     | chr22:44336310 | 22:44336310-A-G | 0.2556 | 0.1613 | 2.88E-02 | 1.785 | 0.207677049 |
| rs2924433  | rs1883349  | 2668 | 0.843 | chr22:44331943 | 22:44331943-G-A | 0.2556 | 0.1613 | 2.88E-02 | 1.785 | 0.207677049 |
| rs2072907  | rs16991175 | 2678 | 0.947 | chr22:44335331 | 22:44335331-T-C | 0.2556 | 0.1613 | 2.88E-02 | 1.785 | 0.207677049 |
| rs2072907  | rs35621602 | 2753 | 1     | chr22:44335406 | 22:44335406-C-A | 0.2556 | 0.1613 | 2.88E-02 | 1.785 | 0.207677049 |
| rs16991175 | rs2281135  | 2761 | 0.947 | chr22:44332570 | a exm-rs2281135 | 0.2556 | 0.1613 | 2.88E-02 | 1.785 | 0.207677049 |
| rs2281135  | rs16991175 | 2761 | 0.947 | chr22:44335331 | 22:44335331-T-C | 0.2556 | 0.1613 | 2.88E-02 | 1.785 | 0.207677049 |
| rs2072905  | rs1010022  | 2831 | 1     | chr22:44336310 | 22:44336310-A-G | 0.2556 | 0.1613 | 2.88E-02 | 1.785 | 0.207677049 |
| rs2281135  | rs35621602 | 2836 | 1     | chr22:44335406 | 22:44335406-C-A | 0.2556 | 0.1613 | 2.88E-02 | 1.785 | 0.207677049 |
| rs35621602 | rs2281135  | 2836 | 1     | chr22:44332570 | a exm-rs2281135 | 0.2556 | 0.1613 | 2.88E-02 | 1.785 | 0.207677049 |
| rs2281137  | rs16991175 | 2838 | 0.836 | chr22:44335331 | 22:44335331-T-C | 0.2556 | 0.1613 | 2.88E-02 | 1.785 | 0.207677049 |
| rs34352134 | rs2281135  | 2846 | 1     | chr22:44332570 | a exm-rs2281135 | 0.2556 | 0.1613 | 2.88E-02 | 1.785 | 0.207677049 |
| rs2281138  | rs16991175 | 2854 | 0.947 | chr22:44335331 | 22:44335331-T-C | 0.2556 | 0.1613 | 2.88E-02 | 1.785 | 0.207677049 |
| rs2072611  | rs1883349  | 2865 | 0.843 | chr22:44331943 | 22:44331943-G-A | 0.2556 | 0.1613 | 2.88E-02 | 1.785 | 0.207677049 |
| rs34879941 | rs2073081  | 2866 | 1     | chr22:44335744 | 22:44335744-T-C | 0.2556 | 0.1613 | 2.88E-02 | 1.785 | 0.207677049 |
| rs2008451  | rs36069781 | 2883 | 1     | chr22:44340086 | 22:44340086-C-T | 0.2556 | 0.1613 | 2.88E-02 | 1.785 | 0.207677049 |
| rs2281137  | rs35621602 | 2913 | 0.895 | chr22:44335406 | 22:44335406-C-A | 0.2556 | 0.1613 | 2.88E-02 | 1.785 | 0.207677049 |
| rs1010023  | rs2072906  | 2926 | 1     | chr22:44333172 | 22:44333172-A-G | 0.2556 | 0.1613 | 2.88E-02 | 1.785 | 0.207677049 |
| rs2281138  | rs35621602 | 2929 | 1     | chr22:44335406 | 22:44335406-C-A | 0.2556 | 0.1613 | 2.88E-02 | 1.785 | 0.207677049 |
| rs2072607  | rs1010022  | 2940 | 1     | chr22:44336310 | 22:44336310-A-G | 0.2556 | 0.1613 | 2.88E-02 | 1.785 | 0.207677049 |
| rs73176497 | rs2896020  | 2989 | 1     | chr22:44333968 | 22:44333968-T-C | 0.2556 | 0.1613 | 2.88E-02 | 1.785 | 0.207677049 |
| rs4823178  | rs926633   | 3004 | 0.947 | chr22:44337533 | 22:44337533-G-A | 0.2556 | 0.1613 | 2.88E-02 | 1.785 | 0.207677049 |
| rs73176497 | rs2401512  | 3012 | 1     | chr22:44333945 | 22:44333945-C-G | 0.2556 | 0.1613 | 2.88E-02 | 1.785 | 0.207677049 |
| rs1977081  | rs2072906  | 3044 | 0.843 | chr22:44333172 | 22:44333172-A-G | 0.2556 | 0.1613 | 2.88E-02 | 1.785 | 0.207677049 |
| rs4823177  | rs926633   | 3047 | 0.947 | chr22:44337533 | 22:44337533-G-A | 0.2556 | 0.1613 | 2.88E-02 | 1.785 | 0.207677049 |
| rs4823176  | rs926633   | 3057 | 0.947 | chr22:44337533 | 22:44337533-G-A | 0.2556 | 0.1613 | 2.88E-02 | 1.785 | 0.207677049 |
| rs2072907  | rs2073081  | 3091 | 1     | chr22:44335744 | 22:44335744-T-C | 0.2556 | 0.1613 | 2.88E-02 | 1.785 | 0.207677049 |
| rs73176497 | rs36069781 | 3129 | 1     | chr22:44340086 | 22:44340086-C-T | 0.2556 | 0.1613 | 2.88E-02 | 1.785 | 0.207677049 |
| rs1010022  | rs2072906  | 3138 | 1     | chr22:44333172 | 22:44333172-A-G | 0.2556 | 0.1613 | 2.88E-02 | 1.785 | 0.207677049 |
| rs2072906  | rs1010022  | 3138 | 1     | chr22:44336310 | 22:44336310-A-G | 0.2556 | 0.1613 | 2.88E-02 | 1.785 | 0.207677049 |
| rs2073081  | rs2281135  | 3174 | 1     | chr22:44332570 | a exm-rs2281135 | 0.2556 | 0.1613 | 2.88E-02 | 1.785 | 0.207677049 |
| rs2281135  | rs2073081  | 3174 | 1     | chr22:44335744 | 22:44335744-T-C | 0.2556 | 0.1613 | 2.88E-02 | 1.785 | 0.207677049 |
| rs4823173  | rs1883349  | 3213 | 0.843 | chr22:44331943 | 22:44331943-G-A | 0.2556 | 0.1613 | 2.88E-02 | 1.785 | 0.207677049 |
| rs1010022  | rs13056555 | 3216 | 1     | chr22:44339526 | 22:44339526-C-G | 0.2556 | 0.1613 | 2.88E-02 | 1.785 | 0.207677049 |
| rs13056555 | rs1010022  | 3216 | 1     | chr22:44336310 | 22:44336310-A-G | 0.2556 | 0.1613 | 2.88E-02 | 1.785 | 0.207677049 |
| rs2281137  | rs2073081  | 3251 | 0.895 | chr22:44335744 | 22:44335744-T-C | 0.2556 | 0.1613 | 2.88E-02 | 1.785 | 0.207677049 |
| rs73176497 | rs2896019  | 3263 | 1     | chr22:44333694 | a rs2896019     | 0.2556 | 0.1613 | 2.88E-02 | 1.785 | 0.207677049 |
| rs2281138  | rs2073081  | 3267 | 1     | chr22:44335744 | 22:44335744-T-C | 0.2556 | 0.1613 | 2.88E-02 | 1.785 | 0.207677049 |
| rs2924433  | rs2281135  | 3295 | 0.843 | chr22:44332570 | a exm-rs2281135 | 0.2556 | 0.1613 | 2.88E-02 | 1.785 | 0.207677049 |
| rs16991175 | rs1883349  | 3388 | 0.947 | chr22:44331943 | 22:44331943-G-A | 0.2556 | 0.1613 | 2.88E-02 | 1.785 | 0.207677049 |
| rs1883349  | rs16991175 | 3388 | 0.947 | chr22:44335331 | 22:44335331-T-C | 0.2556 | 0.1613 | 2.88E-02 | 1.785 | 0.207677049 |
| rs2294916  | rs926633   | 3389 | 0.843 | chr22:44337533 | 22:44337533-G-A | 0.2556 | 0.1613 | 2.88E-02 | 1.785 | 0.207677049 |
| rs926633   | rs2294916  | 3389 | 0.843 | chr22:44340922 | 22:44340922-T-G | 0.2556 | 0.1613 | 2.88E-02 | 1.785 | 0.207677049 |
| rs1010023  | rs13056555 | 3428 | 1     | chr22:44339526 | 22:44339526-C-G | 0.2556 | 0.1613 | 2.88E-02 | 1.785 | 0.207677049 |
| rs34879941 | rs1010022  | 3432 | 1     | chr22:44336310 | 22:44336310-A-G | 0.2556 | 0.1613 | 2.88E-02 | 1.785 | 0.207677049 |
| rs2008451  | rs13056555 | 3443 | 1     | chr22:44339526 | 22:44339526-C-G | 0.2556 | 0.1613 | 2.88E-02 | 1.785 | 0.207677049 |
| rs1883349  | rs35621602 | 3463 | 1     | chr22:44335406 | 22:44335406-C-A | 0.2556 | 0.1613 | 2.88E-02 | 1.785 | 0.207677049 |
| rs35621602 | rs1883349  | 3463 | 1     | chr22:44331943 | 22:44331943-G-A | 0.2556 | 0.1613 | 2.88E-02 | 1.785 | 0.207677049 |
| rs34352134 | rs1883349  | 3473 | 1     | chr22:44331943 | 22:44331943-G-A | 0.2556 | 0.1613 | 2.88E-02 | 1.785 | 0.207677049 |
| rs2072611  | rs2281135  | 3492 | 0.843 | chr22:44332570 | a exm-rs2281135 | 0.2556 | 0.1613 | 2.88E-02 | 1.785 | 0.207677049 |
| rs1883348  | rs16991175 | 3516 | 0.947 | chr22:44335331 | 22:44335331-T-C | 0.2556 | 0.1613 | 2.88E-02 | 1.785 | 0.207677049 |
| rs1010023  | rs2281135  | 3528 | 1     | chr22:44332570 | a exm-rs2281135 | 0.2556 | 0.1613 | 2.88E-02 | 1.785 | 0.207677049 |
| rs13056638 | rs16991175 | 3553 | 0.947 | chr22:44335331 | 22:44335331-T-C | 0.2556 | 0.1613 | 2.88E-02 | 1.785 | 0.207677049 |
| rs289      |            |      |       |                |                 |        |        |          |       |             |

|            |            |      |       |                |                 |        |        |          |       |             |
|------------|------------|------|-------|----------------|-----------------|--------|--------|----------|-------|-------------|
| rs1997693  | rs16991175 | 3818 | 0.947 | chr22:44335331 | 22:44335331-T-C | 0.2556 | 0.1613 | 2.88E-02 | 1.785 | 0.207677049 |
| rs2281138  | rs1010022  | 3833 | 1     | chr22:44336310 | 22:44336310-A-G | 0.2556 | 0.1613 | 2.88E-02 | 1.785 | 0.207677049 |
| rs2896019  | rs926633   | 3839 | 1     | chr22:44337533 | 22:44337533-G-A | 0.2556 | 0.1613 | 2.88E-02 | 1.785 | 0.207677049 |
| rs926633   | rs2896019  | 3839 | 1     | chr22:44333694 | a rs2896019     | 0.2556 | 0.1613 | 2.88E-02 | 1.785 | 0.207677049 |
| rs1977081  | rs2896020  | 3840 | 0.843 | chr22:44333968 | 22:44333968-T-C | 0.2556 | 0.1613 | 2.88E-02 | 1.785 | 0.207677049 |
| rs4823173  | rs2281135  | 3840 | 0.843 | chr22:44332570 | a_exm-rs2281135 | 0.2556 | 0.1613 | 2.88E-02 | 1.785 | 0.207677049 |
| rs1997693  | rs35621602 | 3893 | 1     | chr22:44335406 | 22:44335406-C-A | 0.2556 | 0.1613 | 2.88E-02 | 1.785 | 0.207677049 |
| rs2294433  | rs2072906  | 3897 | 0.843 | chr22:44333172 | 22:44333172-A-G | 0.2556 | 0.1613 | 2.88E-02 | 1.785 | 0.207677049 |
| rs1883348  | rs2073081  | 3929 | 1     | chr22:44335744 | 22:44335744-T-C | 0.2556 | 0.1613 | 2.88E-02 | 1.785 | 0.207677049 |
| rs73176497 | rs2294916  | 3965 | 0.843 | chr22:44340922 | 22:44340922-T-G | 0.2556 | 0.1613 | 2.88E-02 | 1.785 | 0.207677049 |
| rs13056638 | rs2073081  | 3966 | 1     | chr22:44335744 | 22:44335744-T-C | 0.2556 | 0.1613 | 2.88E-02 | 1.785 | 0.207677049 |
| rs1010023  | rs36069781 | 3988 | 1     | chr22:44340086 | 22:44340086-C-T | 0.2556 | 0.1613 | 2.88E-02 | 1.785 | 0.207677049 |
| rs2072905  | rs926633   | 4054 | 1     | chr22:44337533 | 22:44337533-G-A | 0.2556 | 0.1613 | 2.88E-02 | 1.785 | 0.207677049 |
| rs4823181  | rs926633   | 4073 | 1     | chr22:44337533 | 22:44337533-G-A | 0.2556 | 0.1613 | 2.88E-02 | 1.785 | 0.207677049 |
| rs926633   | rs4823181  | 4073 | 1     | chr22:44341606 | 22:44341606-T-C | 0.2556 | 0.1613 | 2.88E-02 | 1.785 | 0.207677049 |
| rs2076211  | rs2072906  | 4094 | 0.843 | chr22:44333172 | 22:44333172-A-G | 0.2556 | 0.1613 | 2.88E-02 | 1.785 | 0.207677049 |
| rs34352134 | rs13056555 | 4110 | 1     | chr22:44339526 | 22:44339526-C-G | 0.2556 | 0.1613 | 2.88E-02 | 1.785 | 0.207677049 |
| rs13056555 | rs35621602 | 4120 | 1     | chr22:44335406 | 22:44335406-C-A | 0.2556 | 0.1613 | 2.88E-02 | 1.785 | 0.207677049 |
| rs35621602 | rs13056555 | 4120 | 1     | chr22:44339526 | 22:44339526-C-G | 0.2556 | 0.1613 | 2.88E-02 | 1.785 | 0.207677049 |
| rs13055900 | rs926633   | 4133 | 1     | chr22:44337533 | 22:44337533-G-A | 0.2556 | 0.1613 | 2.88E-02 | 1.785 | 0.207677049 |
| rs926633   | rs13055900 | 4133 | 1     | chr22:44341666 | 22:44341666-A-G | 0.2556 | 0.1613 | 2.88E-02 | 1.785 | 0.207677049 |
| rs13055874 | rs926633   | 4139 | 1     | chr22:44337533 | 22:44337533-G-A | 0.2556 | 0.1613 | 2.88E-02 | 1.785 | 0.207677049 |
| rs926633   | rs13055874 | 4139 | 1     | chr22:44341672 | 22:44341672-T-C | 0.2556 | 0.1613 | 2.88E-02 | 1.785 | 0.207677049 |
| rs1010023  | rs1883349  | 4155 | 1     | chr22:44331943 | 22:44331943-G-A | 0.2556 | 0.1613 | 2.88E-02 | 1.785 | 0.207677049 |
| rs2076207  | rs926633   | 4163 | 1     | chr22:44337533 | 22:44337533-G-A | 0.2556 | 0.1613 | 2.88E-02 | 1.785 | 0.207677049 |
| rs13056555 | rs16991175 | 4195 | 0.947 | chr22:44335331 | 22:44335331-T-C | 0.2556 | 0.1613 | 2.88E-02 | 1.785 | 0.207677049 |
| rs16991175 | rs13056555 | 4195 | 0.947 | chr22:44339526 | 22:44339526-C-G | 0.2556 | 0.1613 | 2.88E-02 | 1.785 | 0.207677049 |
| rs1997693  | rs2073081  | 4231 | 1     | chr22:44335744 | 22:44335744-T-C | 0.2556 | 0.1613 | 2.88E-02 | 1.785 | 0.207677049 |
| rs2073081  | rs36069781 | 4342 | 1     | chr22:44340086 | 22:44340086-C-T | 0.2556 | 0.1613 | 2.88E-02 | 1.785 | 0.207677049 |
| rs36069781 | rs2073081  | 4342 | 1     | chr22:44335744 | 22:44335744-T-C | 0.2556 | 0.1613 | 2.88E-02 | 1.785 | 0.207677049 |
| rs2072906  | rs926633   | 4361 | 1     | chr22:44337533 | 22:44337533-G-A | 0.2556 | 0.1613 | 2.88E-02 | 1.785 | 0.207677049 |
| rs926633   | rs2072906  | 4361 | 1     | chr22:44333172 | 22:44333172-A-G | 0.2556 | 0.1613 | 2.88E-02 | 1.785 | 0.207677049 |
| rs1010022  | rs1883349  | 4367 | 1     | chr22:44331943 | 22:44331943-G-A | 0.2556 | 0.1613 | 2.88E-02 | 1.785 | 0.207677049 |
| rs1883349  | rs1010022  | 4367 | 1     | chr22:44336310 | 22:44336310-A-G | 0.2556 | 0.1613 | 2.88E-02 | 1.785 | 0.207677049 |
| rs73176497 | rs2281135  | 4387 | 1     | chr22:44332570 | a_exm-rs2281135 | 0.2556 | 0.1613 | 2.88E-02 | 1.785 | 0.207677049 |
| rs2294433  | rs2896019  | 4419 | 0.843 | chr22:44333694 | a rs2896019     | 0.2556 | 0.1613 | 2.88E-02 | 1.785 | 0.207677049 |
| rs4823173  | rs2072906  | 4442 | 0.843 | chr22:44333172 | 22:44333172-A-G | 0.2556 | 0.1613 | 2.88E-02 | 1.785 | 0.207677049 |
| rs1883348  | rs1010022  | 4495 | 1     | chr22:44336310 | 22:44336310-A-G | 0.2556 | 0.1613 | 2.88E-02 | 1.785 | 0.207677049 |
| rs13056638 | rs1010022  | 4532 | 1     | chr22:44336310 | 22:44336310-A-G | 0.2556 | 0.1613 | 2.88E-02 | 1.785 | 0.207677049 |
| rs1010022  | rs2294916  | 4612 | 0.843 | chr22:44340922 | 22:44340922-T-G | 0.2556 | 0.1613 | 2.88E-02 | 1.785 | 0.207677049 |
| rs2294916  | rs1010022  | 4612 | 0.843 | chr22:44336310 | 22:44336310-A-G | 0.2556 | 0.1613 | 2.88E-02 | 1.785 | 0.207677049 |
| rs2076211  | rs2896019  | 4616 | 0.843 | chr22:44333694 | a rs2896019     | 0.2556 | 0.1613 | 2.88E-02 | 1.785 | 0.207677049 |
| rs73176497 | rs4823181  | 4649 | 1     | chr22:44341606 | 22:44341606-T-C | 0.2556 | 0.1613 | 2.88E-02 | 1.785 | 0.207677049 |
| rs34879941 | rs926633   | 4655 | 1     | chr22:44337533 | 22:44337533-G-A | 0.2556 | 0.1613 | 2.88E-02 | 1.785 | 0.207677049 |
| rs12484700 | rs1883349  | 4670 | 0.843 | chr22:44331943 | 22:44331943-G-A | 0.2556 | 0.1613 | 2.88E-02 | 1.785 | 0.207677049 |
| rs2294433  | rs2401512  | 4670 | 0.843 | chr22:44333945 | 22:44333945-C-G | 0.2556 | 0.1613 | 2.88E-02 | 1.785 | 0.207677049 |
| rs34352134 | rs36069781 | 4670 | 1     | chr22:44340086 | 22:44340086-C-T | 0.2556 | 0.1613 | 2.88E-02 | 1.785 | 0.207677049 |
| rs35621602 | rs36069781 | 4680 | 1     | chr22:44340086 | 22:44340086-C-T | 0.2556 | 0.1613 | 2.88E-02 | 1.785 | 0.207677049 |
| rs36069781 | rs35621602 | 4680 | 1     | chr22:44335406 | 22:44335406-C-A | 0.2556 | 0.1613 | 2.88E-02 | 1.785 | 0.207677049 |
| rs2294433  | rs2896020  | 4693 | 0.843 | chr22:44333968 | 22:44333968-T-C | 0.2556 | 0.1613 | 2.88E-02 | 1.785 | 0.207677049 |
| rs73176497 | rs13055900 | 4709 | 1     | chr22:44341666 | 22:44341666-A-G | 0.2556 | 0.1613 | 2.88E-02 | 1.785 | 0.207677049 |
| rs73176497 | rs13055874 | 4715 | 1     | chr22:44341672 | 22:44341672-T-C | 0.2556 | 0.1613 | 2.88E-02 | 1.785 | 0.207677049 |
| rs36055245 | rs1883349  | 4751 | 0.843 | chr22:44331943 | 22:44331943-G-A | 0.2556 | 0.1613 | 2.88E-02 | 1.785 | 0.207677049 |
| rs16991175 | rs36069781 | 4755 | 0.947 | chr22:44340086 | 22:44340086-C-T | 0.2556 | 0.1613 | 2.88E-02 | 1.785 | 0.207677049 |
| rs36069781 | rs16991175 | 4755 | 0.947 | chr22:44335331 | 22:44335331-T-C | 0.2556 | 0.1613 | 2.88E-02 | 1.785 | 0.207677049 |
| rs1997693  | rs1010022  | 4797 | 1     | chr22:44336310 | 22:44336310-A-G | 0.2556 | 0.1613 | 2.88E-02 | 1.785 | 0.207677049 |
| rs1010023  | rs2294916  | 4824 | 0.843 | chr22:44340922 | 22:44340922-T-G | 0.2556 | 0.1613 | 2.88E-02 | 1.785 | 0.207677049 |
| rs2076211  | rs2401512  | 4867 | 0.843 | chr22:44333945 | 22:44333945-C-G | 0.2556 | 0.1613 | 2.88E-02 | 1.785 | 0.207677049 |
| rs2072907  | rs926633   | 4880 | 1     | chr22:44337533 | 22:44337533-G-A | 0.2556 | 0.1613 | 2.88E-02 | 1.785 | 0.207677049 |
| rs4823179  | rs1010022  | 4883 | 1     | chr22:44336310 | 22:44336310-A-G | 0.2556 | 0.1613 | 2.88E-02 | 1.785 | 0.207677049 |
| rs2076211  | rs2896020  | 4890 | 0.843 | chr22:44333968 | 22:44333968-T-C | 0.2556 | 0.1613 | 2.88E-02 | 1.785 | 0.207677049 |
| rs2281135  | rs926633   | 4963 | 1     | chr22:44337533 | 22:44337533-G-A | 0.2556 | 0.1613 | 2.88E-02 | 1.785 | 0.207677049 |
| rs926633   | rs2281135  | 4963 | 1     | chr22:44332570 | a_exm-rs2281135 | 0.2556 | 0.1613 | 2.88E-02 | 1.785 | 0.207677049 |
| rs4823173  | rs2896019  | 4964 | 0.843 | chr22:44333694 | a rs2896019     | 0.2556 | 0.1613 | 2.88E-02 | 1.785 | 0.207677049 |
| rs4823180  | rs1010022  | 4988 | 1     | chr22:44336310 | 22:44336310-A-G | 0.2556 | 0.1613 | 2.88E-02 | 1.785 | 0.207677049 |
| rs4823178  | rs13056555 | 4997 | 0.947 | chr22:44339526 | 22:44339526-C-G | 0.2556 | 0.1613 | 2.88E-02 | 1.785 | 0.207677049 |
| rs73176497 | rs1883349  | 5014 | 1     | chr22:44331943 | 22:44331943-G-A | 0.2556 | 0.1613 | 2.88E-02 | 1.785 | 0.207677049 |
| rs2281137  | rs926633   | 5040 | 0.895 | chr22:44337533 | 22:44337533-G-A | 0.2556 | 0.1613 | 2.88E-02 | 1.785 | 0.207677049 |
| rs4823177  | rs13056555 | 5040 | 0.947 | chr22:44339526 | 22:44339526-C-G | 0.2556 | 0.1613 | 2.88E-02 | 1.785 | 0.207677049 |
| rs4823176  | rs13056555 | 5050 | 0.947 | chr22:44339526 | 22:44339526-C-G | 0.2556 | 0.1613 | 2.88E-02 | 1.785 | 0.207677049 |
| rs2281138  | rs926633   | 5056 | 1     | chr22:44337533 | 22:44337533-G-A | 0.2556 | 0.1613 | 2.88E-02 | 1.785 | 0.207677049 |
| rs2073081  | rs2294916  | 5178 | 0.843 | chr22:44340922 | 22:44340922-T-G | 0.2556 | 0.1613 | 2.88E-02 | 1.785 | 0.207677049 |
| rs2294916  | rs2073081  | 5178 | 0.843 | chr22:44335744 | 22:44335744-T-C | 0.2556 | 0.1613 | 2.88E-02 | 1.785 | 0.207677049 |
| rs4823173  | rs2401512  | 5215 | 0.843 | chr22:44333945 | 22:44333945-C-G | 0.2556 | 0.1613 | 2.88E-02 | 1.785 | 0.207677049 |
| rs4823173  | rs2896020  | 5238 | 0.843 | chr22:44333968 | 22:44333968-T-C | 0.2556 | 0.1613 | 2.88E-02 | 1.785 | 0.207677049 |
| rs11090617 | rs1883349  | 5243 | 0.843 | chr22:44331943 | 22:44331943-G-A | 0.2556 | 0.1613 | 2.88E-02 | 1.785 | 0.207677049 |
| rs1977081  | rs35621602 | 5278 | 0.843 | chr22:44335406 | 22:44335406-C-A | 0.2556 | 0.1613 | 2.88E-02 | 1.785 | 0.207677049 |
| rs1010022  | rs4823181  | 5296 | 1     | chr22:44341606 | 22:44341606-T-C | 0.2556 | 0.1613 | 2.88E-02 | 1.785 | 0.207677049 |
| rs4823181  | rs1010022  | 5296 | 1     | chr22:44336310 | 22:44336310-A-G | 0.2556 | 0.1613 | 2.88E-02 | 1.785 | 0.207677049 |
| rs12484700 | rs2281135  | 5297 | 0.843 | chr22:44332570 | a_exm-rs2281135 | 0.2556 | 0.1613 | 2.88E-02 | 1.785 | 0.207677049 |
| rs1010022  | rs13055900 | 5356 | 1     | chr22:44341666 | 22:44341666-A-G | 0.2556 | 0.1613 | 2.88E-02 | 1.785 | 0.207677049 |
| rs13055900 | rs1010022  | 5356 | 1     | chr22:44336310 | 22:44336310-A-G | 0.2556 | 0.1613 | 2.88E-02 | 1.785 | 0.207677049 |
| rs1010022  | rs13055874 | 5362 | 1     | chr22:44341672 | 22:44341672-T-C | 0.2556 | 0.1613 | 2.88E-02 | 1.785 | 0.207677049 |
| rs13055874 | rs1010022  | 5362 | 1     | chr22:44336310 | 22:44336310-A-G | 0.2556 | 0.1613 | 2.88E-02 | 1.785 | 0.207677049 |
| rs36055245 | rs2281135  | 5378 | 0.843 | chr22:44332570 | a_exm-rs2281135 | 0.2556 | 0.1613 | 2.88E-02 | 1.785 | 0.207677049 |
| rs2008451  | rs926633   | 5436 | 1     | chr22:44337533 | 22:44337533-G-A | 0.2556 | 0.1613 | 2.88E-02 | 1.785 | 0.20767     |

|            |            |      |       |                |                 |        |        |          |       |             |
|------------|------------|------|-------|----------------|-----------------|--------|--------|----------|-------|-------------|
| rs9625962  | rs1883349  | 5671 | 0.843 | chr22:44331943 | 22:44331943-G-A | 0.2556 | 0.1613 | 2.88E-02 | 1.785 | 0.207677049 |
| rs1883348  | rs926633   | 5718 | 1     | chr22:44337533 | 22:44337533-G-A | 0.2556 | 0.1613 | 2.88E-02 | 1.785 | 0.207677049 |
| rs13056638 | rs926633   | 5755 | 1     | chr22:44337533 | 22:44337533-G-A | 0.2556 | 0.1613 | 2.88E-02 | 1.785 | 0.207677049 |
| rs4823179  | rs35621602 | 5787 | 1     | chr22:44335406 | 22:44335406-C-A | 0.2556 | 0.1613 | 2.88E-02 | 1.785 | 0.207677049 |
| rs13056555 | rs2896019  | 5832 | 1     | chr22:44333694 | a rs2896019     | 0.2556 | 0.1613 | 2.88E-02 | 1.785 | 0.207677049 |
| rs2896019  | rs13056555 | 5832 | 1     | chr22:44339526 | 22:44339526-C-G | 0.2556 | 0.1613 | 2.88E-02 | 1.785 | 0.207677049 |
| rs2073081  | rs4823181  | 5862 | 1     | chr22:44341606 | 22:44341606-T-C | 0.2556 | 0.1613 | 2.88E-02 | 1.785 | 0.207677049 |
| rs4823179  | rs16991175 | 5862 | 0.947 | chr22:4435331  | 22:4435331-T-C  | 0.2556 | 0.1613 | 2.88E-02 | 1.785 | 0.207677049 |
| rs4823181  | rs2073081  | 5862 | 1     | chr22:44335744 | 22:44335744-T-C | 0.2556 | 0.1613 | 2.88E-02 | 1.785 | 0.207677049 |
| rs11090617 | rs2281135  | 5870 | 0.843 | chr22:44332570 | a exm-rs2281135 | 0.2556 | 0.1613 | 2.88E-02 | 1.785 | 0.207677049 |
| rs4823180  | rs35621602 | 5892 | 1     | chr22:44335406 | 22:44335406-C-A | 0.2556 | 0.1613 | 2.88E-02 | 1.785 | 0.207677049 |
| rs12484700 | rs2072906  | 5899 | 0.843 | chr22:44333172 | 22:44333172-A-G | 0.2556 | 0.1613 | 2.88E-02 | 1.785 | 0.207677049 |
| rs13055900 | rs2073081  | 5922 | 1     | chr22:44335744 | 22:44335744-T-C | 0.2556 | 0.1613 | 2.88E-02 | 1.785 | 0.207677049 |
| rs2073081  | rs13055900 | 5922 | 1     | chr22:44341666 | 22:44341666-A-G | 0.2556 | 0.1613 | 2.88E-02 | 1.785 | 0.207677049 |
| rs13055874 | rs2073081  | 5928 | 1     | chr22:44335744 | 22:44335744-T-C | 0.2556 | 0.1613 | 2.88E-02 | 1.785 | 0.207677049 |
| rs2073081  | rs13055874 | 5928 | 1     | chr22:44341672 | 22:44341672-T-C | 0.2556 | 0.1613 | 2.88E-02 | 1.785 | 0.207677049 |
| rs12483959 | rs1883349  | 5947 | 0.843 | chr22:44331943 | 22:44331943-G-A | 0.2556 | 0.1613 | 2.88E-02 | 1.785 | 0.207677049 |
| rs4823180  | rs16991175 | 5967 | 0.947 | chr22:4435331  | 22:4435331-T-C  | 0.2556 | 0.1613 | 2.88E-02 | 1.785 | 0.207677049 |
| rs36055245 | rs2072906  | 5980 | 0.843 | chr22:44333172 | 22:44333172-A-G | 0.2556 | 0.1613 | 2.88E-02 | 1.785 | 0.207677049 |
| rs1997693  | rs926633   | 6020 | 1     | chr22:44337533 | 22:44337533-G-A | 0.2556 | 0.1613 | 2.88E-02 | 1.785 | 0.207677049 |
| rs2072905  | rs13056555 | 6047 | 1     | chr22:44339526 | 22:44339526-C-G | 0.2556 | 0.1613 | 2.88E-02 | 1.785 | 0.207677049 |
| rs2896020  | rs36069781 | 6118 | 1     | chr22:44340086 | 22:44340086-C-T | 0.2556 | 0.1613 | 2.88E-02 | 1.785 | 0.207677049 |
| rs36069781 | rs2896020  | 6118 | 1     | chr22:44333968 | 22:44333968-T-C | 0.2556 | 0.1613 | 2.88E-02 | 1.785 | 0.207677049 |
| rs2294433  | rs35621602 | 6131 | 0.843 | chr22:44335406 | 22:44335406-C-A | 0.2556 | 0.1613 | 2.88E-02 | 1.785 | 0.207677049 |
| rs2401512  | rs36069781 | 6141 | 1     | chr22:44340086 | 22:44340086-C-T | 0.2556 | 0.1613 | 2.88E-02 | 1.785 | 0.207677049 |
| rs36069781 | rs2401512  | 6141 | 1     | chr22:44333945 | 22:44333945-C-G | 0.2556 | 0.1613 | 2.88E-02 | 1.785 | 0.207677049 |
| rs2076207  | rs13056555 | 6156 | 1     | chr22:44339526 | 22:44339526-C-G | 0.2556 | 0.1613 | 2.88E-02 | 1.785 | 0.207677049 |
| rs1977081  | rs1010022  | 6182 | 0.843 | chr22:44336310 | 22:44336310-A-G | 0.2556 | 0.1613 | 2.88E-02 | 1.785 | 0.207677049 |
| rs34352134 | rs4823181  | 6190 | 1     | chr22:44341606 | 22:44341606-T-C | 0.2556 | 0.1613 | 2.88E-02 | 1.785 | 0.207677049 |
| rs35621602 | rs4823181  | 6200 | 1     | chr22:44341606 | 22:44341606-T-C | 0.2556 | 0.1613 | 2.88E-02 | 1.785 | 0.207677049 |
| rs4823181  | rs35621602 | 6200 | 1     | chr22:44335406 | 22:44335406-C-A | 0.2556 | 0.1613 | 2.88E-02 | 1.785 | 0.207677049 |
| rs34352134 | rs13055900 | 6250 | 1     | chr22:44341666 | 22:44341666-A-G | 0.2556 | 0.1613 | 2.88E-02 | 1.785 | 0.207677049 |
| rs34352134 | rs13055874 | 6256 | 1     | chr22:44341672 | 22:44341672-T-C | 0.2556 | 0.1613 | 2.88E-02 | 1.785 | 0.207677049 |
| rs13055900 | rs35621602 | 6260 | 1     | chr22:44335406 | 22:44335406-C-A | 0.2556 | 0.1613 | 2.88E-02 | 1.785 | 0.207677049 |
| rs35621602 | rs13055900 | 6260 | 1     | chr22:44341666 | 22:44341666-A-G | 0.2556 | 0.1613 | 2.88E-02 | 1.785 | 0.207677049 |
| rs13055874 | rs35621602 | 6266 | 1     | chr22:44335406 | 22:44335406-C-A | 0.2556 | 0.1613 | 2.88E-02 | 1.785 | 0.207677049 |
| rs35621602 | rs13055874 | 6266 | 1     | chr22:44341672 | 22:44341672-T-C | 0.2556 | 0.1613 | 2.88E-02 | 1.785 | 0.207677049 |
| rs16991175 | rs4823181  | 6275 | 0.947 | chr22:44341606 | 22:44341606-T-C | 0.2556 | 0.1613 | 2.88E-02 | 1.785 | 0.207677049 |
| rs4823181  | rs16991175 | 6275 | 0.947 | chr22:4435331  | 22:4435331-T-C  | 0.2556 | 0.1613 | 2.88E-02 | 1.785 | 0.207677049 |
| rs9625962  | rs2281135  | 6298 | 0.843 | chr22:44332570 | a exm-rs2281135 | 0.2556 | 0.1613 | 2.88E-02 | 1.785 | 0.207677049 |
| rs2076211  | rs35621602 | 6328 | 0.843 | chr22:44335406 | 22:44335406-C-A | 0.2556 | 0.1613 | 2.88E-02 | 1.785 | 0.207677049 |
| rs13055900 | rs16991175 | 6335 | 0.947 | chr22:4435331  | 22:4435331-T-C  | 0.2556 | 0.1613 | 2.88E-02 | 1.785 | 0.207677049 |
| rs16991175 | rs13055900 | 6335 | 0.947 | chr22:44341666 | 22:44341666-A-G | 0.2556 | 0.1613 | 2.88E-02 | 1.785 | 0.207677049 |
| rs13055874 | rs16991175 | 6341 | 0.947 | chr22:4435331  | 22:4435331-T-C  | 0.2556 | 0.1613 | 2.88E-02 | 1.785 | 0.207677049 |
| rs16991175 | rs13055874 | 6341 | 0.947 | chr22:44341672 | 22:44341672-T-C | 0.2556 | 0.1613 | 2.88E-02 | 1.785 | 0.207677049 |
| rs13056555 | rs2072906  | 6354 | 1     | chr22:44333172 | 22:44333172-A-G | 0.2556 | 0.1613 | 2.88E-02 | 1.785 | 0.207677049 |
| rs2072906  | rs13056555 | 6354 | 1     | chr22:44339526 | 22:44339526-C-G | 0.2556 | 0.1613 | 2.88E-02 | 1.785 | 0.207677049 |
| rs2896019  | rs36069781 | 6392 | 1     | chr22:44340086 | 22:44340086-C-T | 0.2556 | 0.1613 | 2.88E-02 | 1.785 | 0.207677049 |
| rs36069781 | rs2896019  | 6392 | 1     | chr22:44333694 | a rs2896019     | 0.2556 | 0.1613 | 2.88E-02 | 1.785 | 0.207677049 |
| rs4823178  | rs2294916  | 6393 | 0.891 | chr22:44340922 | 22:44340922-T-G | 0.2556 | 0.1613 | 2.88E-02 | 1.785 | 0.207677049 |
| rs12484700 | rs2896019  | 6421 | 0.843 | chr22:44333694 | a rs2896019     | 0.2556 | 0.1613 | 2.88E-02 | 1.785 | 0.207677049 |
| rs4823177  | rs2294916  | 6436 | 0.891 | chr22:44340922 | 22:44340922-T-G | 0.2556 | 0.1613 | 2.88E-02 | 1.785 | 0.207677049 |
| rs4823176  | rs2294916  | 6446 | 0.891 | chr22:44340922 | 22:44340922-T-G | 0.2556 | 0.1613 | 2.88E-02 | 1.785 | 0.207677049 |
| rs2294433  | rs2073081  | 6469 | 0.843 | chr22:44335744 | 22:44335744-T-C | 0.2556 | 0.1613 | 2.88E-02 | 1.785 | 0.207677049 |
| rs11090617 | rs2072906  | 6472 | 0.843 | chr22:44333172 | 22:44333172-A-G | 0.2556 | 0.1613 | 2.88E-02 | 1.785 | 0.207677049 |
| rs36055245 | rs2896019  | 6502 | 0.843 | chr22:44333694 | a rs2896019     | 0.2556 | 0.1613 | 2.88E-02 | 1.785 | 0.207677049 |
| rs12483959 | rs2281135  | 6574 | 0.843 | chr22:44332570 | a exm-rs2281135 | 0.2556 | 0.1613 | 2.88E-02 | 1.785 | 0.207677049 |
| rs2072905  | rs36069781 | 6607 | 1     | chr22:44340086 | 22:44340086-C-T | 0.2556 | 0.1613 | 2.88E-02 | 1.785 | 0.207677049 |
| rs34879941 | rs13056555 | 6648 | 1     | chr22:44339526 | 22:44339526-C-G | 0.2556 | 0.1613 | 2.88E-02 | 1.785 | 0.207677049 |
| rs2008451  | rs1010022  | 6659 | 1     | chr22:44336310 | 22:44336310-A-G | 0.2556 | 0.1613 | 2.88E-02 | 1.785 | 0.207677049 |
| rs2076211  | rs2073081  | 6666 | 0.843 | chr22:44335744 | 22:44335744-T-C | 0.2556 | 0.1613 | 2.88E-02 | 1.785 | 0.207677049 |
| rs12484700 | rs2401512  | 6672 | 0.843 | chr22:44333945 | 22:44333945-C-G | 0.2556 | 0.1613 | 2.88E-02 | 1.785 | 0.207677049 |
| rs4823173  | rs35621602 | 6676 | 0.843 | chr22:44335406 | 22:44335406-C-A | 0.2556 | 0.1613 | 2.88E-02 | 1.785 | 0.207677049 |
| rs12484700 | rs2896020  | 6695 | 0.843 | chr22:44333968 | 22:44333968-T-C | 0.2556 | 0.1613 | 2.88E-02 | 1.785 | 0.207677049 |
| rs2076207  | rs36069781 | 6716 | 1     | chr22:44340086 | 22:44340086-C-T | 0.2556 | 0.1613 | 2.88E-02 | 1.785 | 0.207677049 |
| rs36055245 | rs2401512  | 6753 | 0.843 | chr22:44333945 | 22:44333945-C-G | 0.2556 | 0.1613 | 2.88E-02 | 1.785 | 0.207677049 |
| rs34912062 | rs13055874 | 6774 | 0.947 | chr22:44341672 | 22:44341672-T-C | 0.2556 | 0.1613 | 2.88E-02 | 1.785 | 0.207677049 |
| rs36055245 | rs2896020  | 6776 | 0.843 | chr22:44333968 | 22:44333968-T-C | 0.2556 | 0.1613 | 2.88E-02 | 1.785 | 0.207677049 |
| rs34912062 | rs13055900 | 6780 | 0.947 | chr22:44341666 | 22:44341666-A-G | 0.2556 | 0.1613 | 2.88E-02 | 1.785 | 0.207677049 |
| rs4912062  | rs4823181  | 6840 | 0.947 | chr22:44341606 | 22:44341606-T-C | 0.2556 | 0.1613 | 2.88E-02 | 1.785 | 0.207677049 |
| rs2072907  | rs13056555 | 6873 | 1     | chr22:44339526 | 22:44339526-C-G | 0.2556 | 0.1613 | 2.88E-02 | 1.785 | 0.207677049 |
| rs9625962  | rs2072906  | 6900 | 0.843 | chr22:44333172 | 22:44333172-A-G | 0.2556 | 0.1613 | 2.88E-02 | 1.785 | 0.207677049 |
| rs2072906  | rs36069781 | 6914 | 1     | chr22:44340086 | 22:44340086-C-T | 0.2556 | 0.1613 | 2.88E-02 | 1.785 | 0.207677049 |
| rs36069781 | rs2072906  | 6914 | 1     | chr22:44333172 | 22:44333172-A-G | 0.2556 | 0.1613 | 2.88E-02 | 1.785 | 0.207677049 |
| rs2294916  | rs2896020  | 6954 | 0.843 | chr22:44333968 | 22:44333968-T-C | 0.2556 | 0.1613 | 2.88E-02 | 1.785 | 0.207677049 |
| rs2896020  | rs2294916  | 6954 | 0.843 | chr22:44340922 | 22:44340922-T-G | 0.2556 | 0.1613 | 2.88E-02 | 1.785 | 0.207677049 |
| rs13056555 | rs2281135  | 6956 | 1     | chr22:44332570 | a exm-rs2281135 | 0.2556 | 0.1613 | 2.88E-02 | 1.785 | 0.207677049 |
| rs2281135  | rs13056555 | 6956 | 1     | chr22:44339526 | 22:44339526-C-G | 0.2556 | 0.1613 | 2.88E-02 | 1.785 | 0.207677049 |
| rs2294916  | rs2401512  | 6977 | 0.843 | chr22:44333945 | 22:44333945-C-G | 0.2556 | 0.1613 | 2.88E-02 | 1.785 | 0.207677049 |
| rs2401512  | rs2294916  | 6977 | 0.843 | chr22:44340922 | 22:44340922-T-G | 0.2556 | 0.1613 | 2.88E-02 | 1.785 | 0.207677049 |
| rs11090617 | rs2896019  | 6994 | 0.843 | chr22:44333694 | a rs2896019     | 0.2556 | 0.1613 | 2.88E-02 | 1.785 | 0.207677049 |
| rs4823173  | rs2073081  | 7014 | 0.843 | chr22:44335744 | 22:44335744-T-C | 0.2556 | 0.1613 | 2.88E-02 | 1.785 | 0.207677049 |
| rs2281137  | rs13056555 | 7033 | 0.895 | chr22:44339526 | 22:44339526-C-G | 0.2556 | 0.1613 | 2.88E-02 | 1.785 | 0.207677049 |
| rs2294433  | rs1010022  | 7035 | 0.843 | chr22:44336310 | 22:44336310-A-G | 0.2556 | 0.1613 | 2.88E-02 | 1.785 | 0.207677049 |
| rs2281138  | rs13056555 | 7049 | 1     | chr22:44339526 | 22:44339526-C-G | 0.2556 | 0.1613 | 2.88E-02 | 1.785 | 0.207677049 |
| rs4823178  | rs4823181  | 7077 | 0.947 | chr22:44341606 | 22:44341606-T-C | 0.2556 | 0.1613 | 2.88E-02 | 1.785 | 0.207677049 |
| rs4823177  | rs         |      |       |                |                 |        |        |          |       |             |

|            |            |      |       |                |                 |        |        |          |       |             |
|------------|------------|------|-------|----------------|-----------------|--------|--------|----------|-------|-------------|
| rs1977081  | rs926633   | 7405 | 0.843 | chr22:44337533 | 22:44337533-G-A | 0.2556 | 0.1613 | 2.88E-02 | 1.785 | 0.207677049 |
| rs9625962  | rs2896019  | 7422 | 0.843 | chr22:44333694 | a rs2896019     | 0.2556 | 0.1613 | 2.88E-02 | 1.785 | 0.207677049 |
| rs2072907  | rs36069781 | 7433 | 1     | chr22:44340086 | 22:44340086-C-T | 0.2556 | 0.1613 | 2.88E-02 | 1.785 | 0.207677049 |
| rs2072905  | rs2294916  | 7443 | 0.843 | chr22:44340922 | 22:44340922-T-G | 0.2556 | 0.1613 | 2.88E-02 | 1.785 | 0.207677049 |
| rs4823179  | rs2896019  | 7499 | 1     | chr22:44333694 | a rs2896019     | 0.2556 | 0.1613 | 2.88E-02 | 1.785 | 0.207677049 |
| rs2281135  | rs36069781 | 7516 | 1     | chr22:44340086 | 22:44340086-C-T | 0.2556 | 0.1613 | 2.88E-02 | 1.785 | 0.207677049 |
| rs36069781 | rs2281135  | 7516 | 1     | chr22:44332570 | a exm-rs2281135 | 0.2556 | 0.1613 | 2.88E-02 | 1.785 | 0.207677049 |
| rs2076207  | rs2294916  | 7552 | 0.843 | chr22:44340922 | 22:44340922-T-G | 0.2556 | 0.1613 | 2.88E-02 | 1.785 | 0.207677049 |
| rs2008451  | rs35621602 | 7563 | 1     | chr22:44335406 | a rs2294916     | 0.2556 | 0.1613 | 2.88E-02 | 1.785 | 0.207677049 |
| rs1474745  | rs13055874 | 7564 | 0.947 | chr22:44341672 | 22:44341672-T-C | 0.2556 | 0.1613 | 2.88E-02 | 1.785 | 0.207677049 |
| rs1474745  | rs13055900 | 7570 | 0.947 | chr22:44341666 | 22:44341666-A-G | 0.2556 | 0.1613 | 2.88E-02 | 1.785 | 0.207677049 |
| rs4823173  | rs1010022  | 7580 | 0.843 | chr22:44336310 | 22:44336310-A-G | 0.2556 | 0.1613 | 2.88E-02 | 1.785 | 0.207677049 |
| rs13056555 | rs1883349  | 7583 | 1     | chr22:44331943 | 22:44331943-G-A | 0.2556 | 0.1613 | 2.88E-02 | 1.785 | 0.207677049 |
| rs1883349  | rs13056555 | 7583 | 1     | chr22:44339526 | 22:44339526-C-G | 0.2556 | 0.1613 | 2.88E-02 | 1.785 | 0.207677049 |
| rs2281137  | rs36069781 | 7593 | 0.895 | chr22:44340086 | 22:44340086-C-T | 0.2556 | 0.1613 | 2.88E-02 | 1.785 | 0.207677049 |
| rs4823180  | rs2896019  | 7604 | 1     | chr22:44333694 | a rs2896019     | 0.2556 | 0.1613 | 2.88E-02 | 1.785 | 0.207677049 |
| rs2281138  | rs36069781 | 7609 | 1     | chr22:44340086 | 22:44340086-C-T | 0.2556 | 0.1613 | 2.88E-02 | 1.785 | 0.207677049 |
| rs1474745  | rs4823181  | 7630 | 0.947 | chr22:44341606 | 22:44341606-T-C | 0.2556 | 0.1613 | 2.88E-02 | 1.785 | 0.207677049 |
| rs2008451  | rs16991175 | 7638 | 0.947 | chr22:44335331 | 22:44335331-T-C | 0.2556 | 0.1613 | 2.88E-02 | 1.785 | 0.207677049 |
| rs2896020  | rs4823181  | 7638 | 1     | chr22:44341606 | 22:44341606-T-C | 0.2556 | 0.1613 | 2.88E-02 | 1.785 | 0.207677049 |
| rs4823181  | rs2896020  | 7638 | 1     | chr22:4433968  | 22:4433968-T-C  | 0.2556 | 0.1613 | 2.88E-02 | 1.785 | 0.207677049 |
| rs2401512  | rs4823181  | 7661 | 1     | chr22:44341606 | 22:44341606-T-C | 0.2556 | 0.1613 | 2.88E-02 | 1.785 | 0.207677049 |
| rs4823181  | rs2401512  | 7661 | 1     | chr22:44333945 | 22:44333945-C-G | 0.2556 | 0.1613 | 2.88E-02 | 1.785 | 0.207677049 |
| rs9625962  | rs2401512  | 7673 | 0.843 | chr22:44333945 | 22:44333945-C-G | 0.2556 | 0.1613 | 2.88E-02 | 1.785 | 0.207677049 |
| rs9625962  | rs2896020  | 7696 | 0.843 | chr22:4433968  | 22:4433968-T-C  | 0.2556 | 0.1613 | 2.88E-02 | 1.785 | 0.207677049 |
| rs12483959 | rs2896019  | 7698 | 0.843 | chr22:44333694 | a rs2896019     | 0.2556 | 0.1613 | 2.88E-02 | 1.785 | 0.207677049 |
| rs13055900 | rs2896020  | 7698 | 1     | chr22:4433968  | 22:4433968-T-C  | 0.2556 | 0.1613 | 2.88E-02 | 1.785 | 0.207677049 |
| rs2896020  | rs13059000 | 7698 | 1     | chr22:44341666 | 22:44341666-A-G | 0.2556 | 0.1613 | 2.88E-02 | 1.785 | 0.207677049 |
| rs13055874 | rs2896020  | 7704 | 1     | chr22:4433968  | 22:4433968-T-C  | 0.2556 | 0.1613 | 2.88E-02 | 1.785 | 0.207677049 |
| rs2896020  | rs13055874 | 7704 | 1     | chr22:44341672 | 22:44341672-T-C | 0.2556 | 0.1613 | 2.88E-02 | 1.785 | 0.207677049 |
| rs1883348  | rs13056555 | 7711 | 1     | chr22:44339526 | 22:44339526-C-G | 0.2556 | 0.1613 | 2.88E-02 | 1.785 | 0.207677049 |
| rs13055900 | rs2401512  | 7721 | 1     | chr22:44333945 | 22:44333945-C-G | 0.2556 | 0.1613 | 2.88E-02 | 1.785 | 0.207677049 |
| rs2401512  | rs13055900 | 7721 | 1     | chr22:44341666 | 22:44341666-A-G | 0.2556 | 0.1613 | 2.88E-02 | 1.785 | 0.207677049 |
| rs2092501  | rs13056555 | 7725 | 0.947 | chr22:44339526 | 22:44339526-C-G | 0.2556 | 0.1613 | 2.88E-02 | 1.785 | 0.207677049 |
| rs13055874 | rs2401512  | 7727 | 1     | chr22:44333945 | 22:44333945-C-G | 0.2556 | 0.1613 | 2.88E-02 | 1.785 | 0.207677049 |
| rs2401512  | rs13055874 | 7727 | 1     | chr22:44341672 | 22:44341672-T-C | 0.2556 | 0.1613 | 2.88E-02 | 1.785 | 0.207677049 |
| rs13056638 | rs13056638 | 7748 | 1     | chr22:44339526 | 22:44339526-C-G | 0.2556 | 0.1613 | 2.88E-02 | 1.785 | 0.207677049 |
| rs2072906  | rs2294916  | 7750 | 0.843 | chr22:44340922 | 22:44340922-T-G | 0.2556 | 0.1613 | 2.88E-02 | 1.785 | 0.207677049 |
| rs2294916  | rs2072906  | 7750 | 0.843 | chr22:44333172 | 22:44333172-A-G | 0.2556 | 0.1613 | 2.88E-02 | 1.785 | 0.207677049 |
| rs2896019  | rs4823181  | 7912 | 1     | chr22:44341606 | 22:44341606-T-C | 0.2556 | 0.1613 | 2.88E-02 | 1.785 | 0.207677049 |
| rs4823181  | rs2896019  | 7912 | 1     | chr22:44333694 | a rs2896019     | 0.2556 | 0.1613 | 2.88E-02 | 1.785 | 0.207677049 |
| rs12483959 | rs2401512  | 7949 | 0.843 | chr22:44333945 | 22:44333945-C-G | 0.2556 | 0.1613 | 2.88E-02 | 1.785 | 0.207677049 |
| rs12483959 | rs2896020  | 7972 | 0.843 | chr22:4433968  | 22:4433968-T-C  | 0.2556 | 0.1613 | 2.88E-02 | 1.785 | 0.207677049 |
| rs13055900 | rs2896019  | 7972 | 1     | chr22:44333694 | a rs2896019     | 0.2556 | 0.1613 | 2.88E-02 | 1.785 | 0.207677049 |
| rs2896019  | rs13059000 | 7972 | 1     | chr22:44341666 | 22:44341666-A-G | 0.2556 | 0.1613 | 2.88E-02 | 1.785 | 0.207677049 |
| rs13055874 | rs2896019  | 7978 | 1     | chr22:44333694 | a rs2896019     | 0.2556 | 0.1613 | 2.88E-02 | 1.785 | 0.207677049 |
| rs2896019  | rs13055874 | 7978 | 1     | chr22:44341672 | 22:44341672-T-C | 0.2556 | 0.1613 | 2.88E-02 | 1.785 | 0.207677049 |
| rs1997693  | rs13056555 | 8013 | 1     | chr22:44339526 | 22:44339526-C-G | 0.2556 | 0.1613 | 2.88E-02 | 1.785 | 0.207677049 |
| rs4823179  | rs2072906  | 8021 | 1     | chr22:44333172 | 22:44333172-A-G | 0.2556 | 0.1613 | 2.88E-02 | 1.785 | 0.207677049 |
| rs34879941 | rs2294916  | 8044 | 0.843 | chr22:44340922 | 22:44340922-T-G | 0.2556 | 0.1613 | 2.88E-02 | 1.785 | 0.207677049 |
| rs4823180  | rs2072906  | 8126 | 1     | chr22:44333172 | 22:44333172-A-G | 0.2556 | 0.1613 | 2.88E-02 | 1.785 | 0.207677049 |
| rs2072905  | rs4823181  | 8127 | 1     | chr22:44341606 | 22:44341606-T-C | 0.2556 | 0.1613 | 2.88E-02 | 1.785 | 0.207677049 |
| rs12484700 | rs35621602 | 8133 | 0.843 | chr22:44335406 | 22:44335406-C-A | 0.2556 | 0.1613 | 2.88E-02 | 1.785 | 0.207677049 |
| rs1883349  | rs36069781 | 8143 | 1     | chr22:44340086 | 22:44340086-C-T | 0.2556 | 0.1613 | 2.88E-02 | 1.785 | 0.207677049 |
| rs36069781 | rs1883349  | 8143 | 1     | chr22:44331943 | 22:44331943-G-A | 0.2556 | 0.1613 | 2.88E-02 | 1.785 | 0.207677049 |
| rs2072905  | rs13055900 | 8187 | 1     | chr22:44341666 | 22:44341666-A-G | 0.2556 | 0.1613 | 2.88E-02 | 1.785 | 0.207677049 |
| rs2072905  | rs13055874 | 8193 | 1     | chr22:44341672 | 22:44341672-T-C | 0.2556 | 0.1613 | 2.88E-02 | 1.785 | 0.207677049 |
| rs36055245 | rs35621602 | 8214 | 0.843 | chr22:44335406 | 22:44335406-C-A | 0.2556 | 0.1613 | 2.88E-02 | 1.785 | 0.207677049 |
| rs2076207  | rs4823181  | 8236 | 1     | chr22:44341606 | 22:44341606-T-C | 0.2556 | 0.1613 | 2.88E-02 | 1.785 | 0.207677049 |
| rs2294433  | rs926633   | 8258 | 0.843 | chr22:44337533 | 22:44337533-G-A | 0.2556 | 0.1613 | 2.88E-02 | 1.785 | 0.207677049 |
| rs2072907  | rs2294916  | 8269 | 0.843 | chr22:44340922 | 22:44340922-T-G | 0.2556 | 0.1613 | 2.88E-02 | 1.785 | 0.207677049 |
| rs1883348  | rs36069781 | 8271 | 1     | chr22:44340086 | 22:44340086-C-T | 0.2556 | 0.1613 | 2.88E-02 | 1.785 | 0.207677049 |
| rs2076207  | rs13055900 | 8296 | 1     | chr22:44341666 | 22:44341666-A-G | 0.2556 | 0.1613 | 2.88E-02 | 1.785 | 0.207677049 |
| rs2076207  | rs13055874 | 8302 | 1     | chr22:44341672 | 22:44341672-T-C | 0.2556 | 0.1613 | 2.88E-02 | 1.785 | 0.207677049 |
| rs13056638 | rs36069781 | 8308 | 1     | chr22:44340086 | 22:44340086-C-T | 0.2556 | 0.1613 | 2.88E-02 | 1.785 | 0.207677049 |
| rs2281135  | rs2294916  | 8352 | 0.843 | chr22:44340922 | 22:44340922-T-G | 0.2556 | 0.1613 | 2.88E-02 | 1.785 | 0.207677049 |
| rs2294916  | rs2281135  | 8352 | 0.843 | chr22:44332570 | a exm-rs2281135 | 0.2556 | 0.1613 | 2.88E-02 | 1.785 | 0.207677049 |
| rs34912062 | rs36069781 | 8360 | 0.947 | chr22:44340086 | 22:44340086-C-T | 0.2556 | 0.1613 | 2.88E-02 | 1.785 | 0.207677049 |
| rs2072906  | rs4823181  | 8434 | 1     | chr22:44341606 | 22:44341606-T-C | 0.2556 | 0.1613 | 2.88E-02 | 1.785 | 0.207677049 |
| rs4823181  | rs2072906  | 8434 | 1     | chr22:44333172 | 22:44333172-A-G | 0.2556 | 0.1613 | 2.88E-02 | 1.785 | 0.207677049 |
| rs2281138  | rs2294916  | 8445 | 0.843 | chr22:44340922 | 22:44340922-T-G | 0.2556 | 0.1613 | 2.88E-02 | 1.785 | 0.207677049 |
| rs2076211  | rs926633   | 8455 | 0.843 | chr22:44337533 | 22:44337533-G-A | 0.2556 | 0.1613 | 2.88E-02 | 1.785 | 0.207677049 |
| rs12484700 | rs2073081  | 8471 | 0.843 | chr22:44335744 | 22:44335744-T-C | 0.2556 | 0.1613 | 2.88E-02 | 1.785 | 0.207677049 |
| rs13055900 | rs2072906  | 8494 | 1     | chr22:44333172 | 22:44333172-A-G | 0.2556 | 0.1613 | 2.88E-02 | 1.785 | 0.207677049 |
| rs2072906  | rs13059000 | 8494 | 1     | chr22:44341666 | 22:44341666-A-G | 0.2556 | 0.1613 | 2.88E-02 | 1.785 | 0.207677049 |
| rs13055874 | rs2072906  | 8500 | 1     | chr22:44333172 | 22:44333172-A-G | 0.2556 | 0.1613 | 2.88E-02 | 1.785 | 0.207677049 |
| rs2072906  | rs13055874 | 8500 | 1     | chr22:44341672 | 22:44341672-T-C | 0.2556 | 0.1613 | 2.88E-02 | 1.785 | 0.207677049 |
| rs36055245 | rs2073081  | 8552 | 0.843 | chr22:44335744 | 22:44335744-T-C | 0.2556 | 0.1613 | 2.88E-02 | 1.785 | 0.207677049 |
| rs1997693  | rs36069781 | 8573 | 1     | chr22:44340086 | 22:44340086-C-T | 0.2556 | 0.1613 | 2.88E-02 | 1.785 | 0.207677049 |
| rs4823179  | rs2281135  | 8623 | 1     | chr22:44332570 | a exm-rs2281135 | 0.2556 | 0.1613 | 2.88E-02 | 1.785 | 0.207677049 |
| rs11090617 | rs35621602 | 8706 | 0.843 | chr22:44335406 | 22:44335406-C-A | 0.2556 | 0.1613 | 2.88E-02 | 1.785 | 0.207677049 |
| rs34879941 | rs4823181  | 8728 | 1     | chr22:44341606 | 22:44341606-T-C | 0.2556 | 0.1613 | 2.88E-02 | 1.785 | 0.207677049 |
| rs4823180  | rs2281135  | 8728 | 1     | chr22:44332570 | a exm-rs2281135 | 0.2556 | 0.1613 | 2.88E-02 | 1.785 | 0.207677049 |
| rs34879941 | rs13055900 | 8788 | 1     | chr22:44341666 | 22:44341666-A-G | 0.2556 | 0.1613 | 2.88E-02 | 1.785 | 0.207677049 |
| rs34879941 | rs13055874 | 8794 | 1     | chr22:44341672 | 22:44341672-T-C | 0.2556 | 0.1613 | 2.88E-02 | 1.785 | 0.207677049 |
| rs4823173  | rs926633   | 8803 | 0.843 | chr22:44337533 | 22:44337533-G-A | 0.2556 | 0.1613 | 2.88E-02 | 1.785 | 0.207677049 |
| rs34912    |            |      |       |                |                 |        |        |          |       |             |

|            |            |       |       |                |                 |        |        |          |       |             |
|------------|------------|-------|-------|----------------|-----------------|--------|--------|----------|-------|-------------|
| rs13056638 | rs2294916  | 9144  | 0.843 | chr22:44340922 | 22:44340922-T-G | 0.2556 | 0.1613 | 2.88E-02 | 1.785 | 0.207677049 |
| rs1474745  | rs36069781 | 9150  | 0.947 | chr22:44340086 | 22:44340086-C-T | 0.2556 | 0.1613 | 2.88E-02 | 1.785 | 0.207677049 |
| rs2281137  | rs13055900 | 9173  | 0.895 | chr22:44341666 | 22:44341666-A-G | 0.2556 | 0.1613 | 2.88E-02 | 1.785 | 0.207677049 |
| rs2281137  | rs13055874 | 9179  | 0.895 | chr22:44341672 | 22:44341672-T-C | 0.2556 | 0.1613 | 2.88E-02 | 1.785 | 0.207677049 |
| rs2281138  | rs13055900 | 9189  | 1     | chr22:44341666 | 22:44341666-A-G | 0.2556 | 0.1613 | 2.88E-02 | 1.785 | 0.207677049 |
| rs2281138  | rs13055874 | 9195  | 1     | chr22:44341672 | 22:44341672-T-C | 0.2556 | 0.1613 | 2.88E-02 | 1.785 | 0.207677049 |
| rs4823179  | rs1883349  | 9250  | 1     | chr22:44331943 | 22:44331943-G-A | 0.2556 | 0.1613 | 2.88E-02 | 1.785 | 0.207677049 |
| rs2008451  | rs2896019  | 9275  | 1     | chr22:44333694 | a_rs2896019     | 0.2556 | 0.1613 | 2.88E-02 | 1.785 | 0.207677049 |
| rs4823180  | rs1883349  | 9355  | 1     | chr22:44331943 | 22:44331943-G-A | 0.2556 | 0.1613 | 2.88E-02 | 1.785 | 0.207677049 |
| rs1977081  | rs13056555 | 9398  | 0.843 | chr22:44339526 | 22:44339526-C-G | 0.2556 | 0.1613 | 2.88E-02 | 1.785 | 0.207677049 |
| rs1997693  | rs2294916  | 9409  | 0.843 | chr22:44340922 | 22:44340922-T-G | 0.2556 | 0.1613 | 2.88E-02 | 1.785 | 0.207677049 |
| rs12483959 | rs35621602 | 9410  | 0.843 | chr22:44335406 | 22:44335406-C-A | 0.2556 | 0.1613 | 2.88E-02 | 1.785 | 0.207677049 |
| rs9625962  | rs2073081  | 9472  | 0.843 | chr22:44335744 | 22:44335744-T-C | 0.2556 | 0.1613 | 2.88E-02 | 1.785 | 0.207677049 |
| rs11090617 | rs1010022  | 9610  | 0.843 | chr22:44336310 | 22:44336310-A-G | 0.2556 | 0.1613 | 2.88E-02 | 1.785 | 0.207677049 |
| rs1883349  | rs4823181  | 9663  | 1     | chr22:44341606 | 22:44341606-T-C | 0.2556 | 0.1613 | 2.88E-02 | 1.785 | 0.207677049 |
| rs4823181  | rs1883349  | 9663  | 1     | chr22:44331943 | 22:44331943-G-A | 0.2556 | 0.1613 | 2.88E-02 | 1.785 | 0.207677049 |
| rs1474745  | rs13056555 | 9710  | 0.947 | chr22:44339526 | 22:44339526-C-G | 0.2556 | 0.1613 | 2.88E-02 | 1.785 | 0.207677049 |
| rs2092501  | rs926633   | 9718  | 0.947 | chr22:44337533 | 22:44337533-G-A | 0.2556 | 0.1613 | 2.88E-02 | 1.785 | 0.207677049 |
| rs13055900 | rs1883349  | 9723  | 1     | chr22:44331943 | 22:44331943-G-A | 0.2556 | 0.1613 | 2.88E-02 | 1.785 | 0.207677049 |
| rs1883349  | rs13055900 | 9723  | 1     | chr22:44341666 | 22:44341666-A-G | 0.2556 | 0.1613 | 2.88E-02 | 1.785 | 0.207677049 |
| rs13055874 | rs1883349  | 9729  | 1     | chr22:44331943 | 22:44331943-G-A | 0.2556 | 0.1613 | 2.88E-02 | 1.785 | 0.207677049 |
| rs1883349  | rs13055874 | 9729  | 1     | chr22:44341672 | 22:44341672-T-C | 0.2556 | 0.1613 | 2.88E-02 | 1.785 | 0.207677049 |
| rs12483959 | rs2073081  | 9748  | 0.843 | chr22:44335744 | 22:44335744-T-C | 0.2556 | 0.1613 | 2.88E-02 | 1.785 | 0.207677049 |
| rs1883348  | rs4823181  | 9791  | 1     | chr22:44341606 | 22:44341606-T-C | 0.2556 | 0.1613 | 2.88E-02 | 1.785 | 0.207677049 |
| rs2008451  | rs2072906  | 9797  | 1     | chr22:44333172 | 22:44333172-A-G | 0.2556 | 0.1613 | 2.88E-02 | 1.785 | 0.207677049 |
| rs13056638 | rs4823181  | 9828  | 1     | chr22:44341606 | 22:44341606-T-C | 0.2556 | 0.1613 | 2.88E-02 | 1.785 | 0.207677049 |
| rs1883348  | rs13059000 | 9851  | 1     | chr22:44341666 | 22:44341666-A-G | 0.2556 | 0.1613 | 2.88E-02 | 1.785 | 0.207677049 |
| rs1883348  | rs13055874 | 9857  | 1     | chr22:44341672 | 22:44341672-T-C | 0.2556 | 0.1613 | 2.88E-02 | 1.785 | 0.207677049 |
| rs13056638 | rs13059000 | 9888  | 1     | chr22:44341666 | 22:44341666-A-G | 0.2556 | 0.1613 | 2.88E-02 | 1.785 | 0.207677049 |
| rs13056638 | rs13055874 | 9894  | 1     | chr22:44341672 | 22:44341672-T-C | 0.2556 | 0.1613 | 2.88E-02 | 1.785 | 0.207677049 |
| rs1977081  | rs36069781 | 9958  | 0.843 | chr22:44340086 | 22:44340086-C-T | 0.2556 | 0.1613 | 2.88E-02 | 1.785 | 0.207677049 |
| rs9625962  | rs1010022  | 10038 | 0.843 | chr22:44336310 | 22:44336310-A-G | 0.2556 | 0.1613 | 2.88E-02 | 1.785 | 0.207677049 |
| rs1997693  | rs4823181  | 10093 | 1     | chr22:44341606 | 22:44341606-T-C | 0.2556 | 0.1613 | 2.88E-02 | 1.785 | 0.207677049 |
| rs1997693  | rs13055900 | 10153 | 1     | chr22:44341666 | 22:44341666-A-G | 0.2556 | 0.1613 | 2.88E-02 | 1.785 | 0.207677049 |
| rs1997693  | rs13055874 | 10159 | 1     | chr22:44341672 | 22:44341672-T-C | 0.2556 | 0.1613 | 2.88E-02 | 1.785 | 0.207677049 |
| rs2294433  | rs13056555 | 10251 | 0.843 | chr22:44339526 | 22:44339526-C-G | 0.2556 | 0.1613 | 2.88E-02 | 1.785 | 0.207677049 |
| rs12484700 | rs926633   | 10260 | 0.843 | chr22:44337533 | 22:44337533-G-A | 0.2556 | 0.1613 | 2.88E-02 | 1.785 | 0.207677049 |
| rs12483959 | rs1010022  | 10314 | 0.843 | chr22:44336310 | 22:44336310-A-G | 0.2556 | 0.1613 | 2.88E-02 | 1.785 | 0.207677049 |
| rs36055245 | rs926633   | 10341 | 0.843 | chr22:44337533 | 22:44337533-G-A | 0.2556 | 0.1613 | 2.88E-02 | 1.785 | 0.207677049 |
| rs2008451  | rs2281135  | 10399 | 1     | chr22:44332570 | a_exm-rs2281135 | 0.2556 | 0.1613 | 2.88E-02 | 1.785 | 0.207677049 |
| rs2076211  | rs13056555 | 10448 | 0.843 | chr22:44339526 | 22:44339526-C-G | 0.2556 | 0.1613 | 2.88E-02 | 1.785 | 0.207677049 |
| rs4823173  | rs13056555 | 10796 | 0.843 | chr22:44339526 | 22:44339526-C-G | 0.2556 | 0.1613 | 2.88E-02 | 1.785 | 0.207677049 |
| rs2294433  | rs36069781 | 10811 | 0.843 | chr22:44340086 | 22:44340086-C-T | 0.2556 | 0.1613 | 2.88E-02 | 1.785 | 0.207677049 |
| rs11090617 | rs926633   | 10833 | 0.843 | chr22:44337533 | 22:44337533-G-A | 0.2556 | 0.1613 | 2.88E-02 | 1.785 | 0.207677049 |
| rs34912062 | rs926633   | 10913 | 0.947 | chr22:44337533 | 22:44337533-G-A | 0.2556 | 0.1613 | 2.88E-02 | 1.785 | 0.207677049 |
| rs2092501  | rs1010022  | 10941 | 0.947 | chr22:44336310 | 22:44336310-A-G | 0.2556 | 0.1613 | 2.88E-02 | 1.785 | 0.207677049 |
| rs2076211  | rs36069781 | 11008 | 0.843 | chr22:44340086 | 22:44340086-C-T | 0.2556 | 0.1613 | 2.88E-02 | 1.785 | 0.207677049 |
| rs2008451  | rs1883349  | 11026 | 1     | chr22:44331943 | 22:44331943-G-A | 0.2556 | 0.1613 | 2.88E-02 | 1.785 | 0.207677049 |
| rs9625962  | rs926633   | 11261 | 0.843 | chr22:44337533 | 22:44337533-G-A | 0.2556 | 0.1613 | 2.88E-02 | 1.785 | 0.207677049 |
| rs4823173  | rs36069781 | 11356 | 0.843 | chr22:44340086 | 22:44340086-C-T | 0.2556 | 0.1613 | 2.88E-02 | 1.785 | 0.207677049 |
| rs1977081  | rs4823181  | 11478 | 0.843 | chr22:44341606 | 22:44341606-T-C | 0.2556 | 0.1613 | 2.88E-02 | 1.785 | 0.207677049 |
| rs2092501  | rs2073081  | 11507 | 0.947 | chr22:44335744 | 22:44335744-T-C | 0.2556 | 0.1613 | 2.88E-02 | 1.785 | 0.207677049 |
| rs12483959 | rs926633   | 11537 | 0.843 | chr22:44337533 | 22:44337533-G-A | 0.2556 | 0.1613 | 2.88E-02 | 1.785 | 0.207677049 |
| rs1977081  | rs13055900 | 11538 | 0.843 | chr22:44341666 | 22:44341666-A-G | 0.2556 | 0.1613 | 2.88E-02 | 1.785 | 0.207677049 |
| rs1977081  | rs13055874 | 11544 | 0.843 | chr22:44341672 | 22:44341672-T-C | 0.2556 | 0.1613 | 2.88E-02 | 1.785 | 0.207677049 |
| rs1474745  | rs926633   | 11703 | 0.947 | chr22:44337533 | 22:44337533-G-A | 0.2556 | 0.1613 | 2.88E-02 | 1.785 | 0.207677049 |
| rs2092501  | rs35621602 | 11845 | 0.947 | chr22:44335406 | 22:44335406-C-A | 0.2556 | 0.1613 | 2.88E-02 | 1.785 | 0.207677049 |
| rs2092501  | rs16991175 | 11920 | 0.891 | chr22:44335331 | 22:44335331-T-C | 0.2556 | 0.1613 | 2.88E-02 | 1.785 | 0.207677049 |
| rs34912062 | rs1010022  | 12136 | 0.947 | chr22:44336310 | 22:44336310-A-G | 0.2556 | 0.1613 | 2.88E-02 | 1.785 | 0.207677049 |
| rs12484700 | rs13056555 | 12253 | 0.843 | chr22:44339526 | 22:44339526-C-G | 0.2556 | 0.1613 | 2.88E-02 | 1.785 | 0.207677049 |
| rs2294433  | rs4823181  | 12331 | 0.843 | chr22:44341606 | 22:44341606-T-C | 0.2556 | 0.1613 | 2.88E-02 | 1.785 | 0.207677049 |
| rs36055245 | rs13056555 | 12334 | 0.843 | chr22:44339526 | 22:44339526-C-G | 0.2556 | 0.1613 | 2.88E-02 | 1.785 | 0.207677049 |
| rs2294433  | rs13059000 | 12391 | 0.843 | chr22:44341666 | 22:44341666-A-G | 0.2556 | 0.1613 | 2.88E-02 | 1.785 | 0.207677049 |
| rs2294433  | rs13055874 | 12397 | 0.843 | chr22:44341672 | 22:44341672-T-C | 0.2556 | 0.1613 | 2.88E-02 | 1.785 | 0.207677049 |
| rs2076211  | rs4823181  | 12528 | 0.843 | chr22:44341606 | 22:44341606-T-C | 0.2556 | 0.1613 | 2.88E-02 | 1.785 | 0.207677049 |
| rs2076211  | rs13055900 | 12588 | 0.843 | chr22:44341666 | 22:44341666-A-G | 0.2556 | 0.1613 | 2.88E-02 | 1.785 | 0.207677049 |
| rs2076211  | rs13055874 | 12594 | 0.843 | chr22:44341672 | 22:44341672-T-C | 0.2556 | 0.1613 | 2.88E-02 | 1.785 | 0.207677049 |
| rs34912062 | rs2073081  | 12702 | 0.947 | chr22:44335744 | 22:44335744-T-C | 0.2556 | 0.1613 | 2.88E-02 | 1.785 | 0.207677049 |
| rs12484700 | rs36069781 | 12813 | 0.843 | chr22:44340086 | 22:44340086-C-T | 0.2556 | 0.1613 | 2.88E-02 | 1.785 | 0.207677049 |
| rs11090617 | rs13056555 | 12826 | 0.843 | chr22:44339526 | 22:44339526-C-G | 0.2556 | 0.1613 | 2.88E-02 | 1.785 | 0.207677049 |
| rs4823173  | rs4823181  | 12876 | 0.843 | chr22:44341606 | 22:44341606-T-C | 0.2556 | 0.1613 | 2.88E-02 | 1.785 | 0.207677049 |
| rs36055245 | rs36069781 | 12894 | 0.843 | chr22:44340086 | 22:44340086-C-T | 0.2556 | 0.1613 | 2.88E-02 | 1.785 | 0.207677049 |
| rs1474745  | rs1010022  | 12926 | 0.947 | chr22:44336310 | 22:44336310-A-G | 0.2556 | 0.1613 | 2.88E-02 | 1.785 | 0.207677049 |
| rs4823173  | rs13055900 | 12936 | 0.843 | chr22:44341666 | 22:44341666-A-G | 0.2556 | 0.1613 | 2.88E-02 | 1.785 | 0.207677049 |
| rs4823173  | rs13055874 | 12942 | 0.843 | chr22:44341672 | 22:44341672-T-C | 0.2556 | 0.1613 | 2.88E-02 | 1.785 | 0.207677049 |
| rs34912062 | rs35621602 | 13040 | 0.947 | chr22:44335406 | 22:44335406-C-A | 0.2556 | 0.1613 | 2.88E-02 | 1.785 | 0.207677049 |
| rs34912062 | rs16991175 | 13115 | 0.891 | chr22:44335331 | 22:44335331-T-C | 0.2556 | 0.1613 | 2.88E-02 | 1.785 | 0.207677049 |
| rs9625962  | rs13056555 | 13254 | 0.843 | chr22:44339526 | 22:44339526-C-G | 0.2556 | 0.1613 | 2.88E-02 | 1.785 | 0.207677049 |
| rs2092501  | rs2896020  | 13283 | 0.947 | chr22:44333968 | 22:44333968-T-C | 0.2556 | 0.1613 | 2.88E-02 | 1.785 | 0.207677049 |
| rs2092501  | rs2401512  | 13306 | 0.947 | chr22:44333945 | 22:44333945-C-G | 0.2556 | 0.1613 | 2.88E-02 | 1.785 | 0.207677049 |
| rs11090617 | rs36069781 | 13386 | 0.843 | chr22:44340086 | 22:44340086-C-T | 0.2556 | 0.1613 | 2.88E-02 | 1.785 | 0.207677049 |
| rs1474745  | rs2073081  | 13492 | 0.947 | chr22:44335744 | 22:44335744-T-C | 0.2556 | 0.1613 | 2.88E-02 | 1.785 | 0.207677049 |
| rs12483959 | rs13056555 | 13530 | 0.843 | chr22:44339526 | 22:44339526-C-G | 0.2556 | 0.1613 | 2.88E-02 | 1.785 | 0.207677049 |
| rs2092501  | rs2896019  | 13557 | 0.947 | chr22:44333694 | a_rs2896019     | 0.2556 | 0.1613 | 2.88E-02 | 1.785 | 0.207677049 |
| rs16991158 | rs2294916  | 13743 | 0.823 | chr22:44340922 | 22:4434         |        |        |          |       |             |

|            |            |       |       |                |                 |        |        |          |       |             |
|------------|------------|-------|-------|----------------|-----------------|--------|--------|----------|-------|-------------|
| rs34912062 | rs2072906  | 15274 | 0.947 | chr22:44333172 | 22:44333172-A-G | 0.2556 | 0.1613 | 2.88E-02 | 1.785 | 0.207677049 |
| rs1474745  | rs2401512  | 15291 | 0.947 | chr22:44333945 | 22:44333945-C-G | 0.2556 | 0.1613 | 2.88E-02 | 1.785 | 0.207677049 |
| rs2092501  | rs1883349  | 15308 | 0.947 | chr22:44331943 | 22:44331943-G-A | 0.2556 | 0.1613 | 2.88E-02 | 1.785 | 0.207677049 |
| rs9625962  | rs4823181  | 15334 | 0.843 | chr22:44341606 | 22:44341606-T-C | 0.2556 | 0.1613 | 2.88E-02 | 1.785 | 0.207677049 |
| rs9625962  | rs13055900 | 15394 | 0.843 | chr22:44341666 | 22:44341666-A-G | 0.2556 | 0.1613 | 2.88E-02 | 1.785 | 0.207677049 |
| rs9625962  | rs13055874 | 15400 | 0.843 | chr22:44341672 | 22:44341672-T-C | 0.2556 | 0.1613 | 2.88E-02 | 1.785 | 0.207677049 |
| rs1474745  | rs2896019  | 15542 | 0.947 | chr22:44333694 | a_rs2896019     | 0.2556 | 0.1613 | 2.88E-02 | 1.785 | 0.207677049 |
| rs56373884 | rs2294916  | 15546 | 0.83  | chr22:44340922 | 22:44340922-T-G | 0.2556 | 0.1613 | 2.88E-02 | 1.785 | 0.207677049 |
| rs12483959 | rs4823181  | 15610 | 0.843 | chr22:44341606 | 22:44341606-T-C | 0.2556 | 0.1613 | 2.88E-02 | 1.785 | 0.207677049 |
| rs12483959 | rs13055900 | 15670 | 0.843 | chr22:44341666 | 22:44341666-A-G | 0.2556 | 0.1613 | 2.88E-02 | 1.785 | 0.207677049 |
| rs12483959 | rs13055874 | 15676 | 0.843 | chr22:44341672 | 22:44341672-T-C | 0.2556 | 0.1613 | 2.88E-02 | 1.785 | 0.207677049 |
| rs34912062 | rs2281135  | 15876 | 0.947 | chr22:44332570 | a_exm-rs2281135 | 0.2556 | 0.1613 | 2.88E-02 | 1.785 | 0.207677049 |
| rs1474745  | rs2072906  | 16064 | 0.947 | chr22:44333172 | 22:44333172-A-G | 0.2556 | 0.1613 | 2.88E-02 | 1.785 | 0.207677049 |
| rs56373884 | rs36069781 | 16382 | 0.895 | chr22:44340086 | 22:44340086-C-T | 0.2556 | 0.1613 | 2.88E-02 | 1.785 | 0.207677049 |
| rs34912062 | rs1883349  | 16503 | 0.947 | chr22:44331943 | 22:44331943-G-A | 0.2556 | 0.1613 | 2.88E-02 | 1.785 | 0.207677049 |
| rs1474745  | rs2281135  | 16666 | 0.947 | chr22:44332570 | a_exm-rs2281135 | 0.2556 | 0.1613 | 2.88E-02 | 1.785 | 0.207677049 |
| rs56373884 | rs13056555 | 16942 | 0.895 | chr22:44339526 | 22:44339526-C-G | 0.2556 | 0.1613 | 2.88E-02 | 1.785 | 0.207677049 |
| rs1474745  | rs1883349  | 17293 | 0.947 | chr22:44331943 | 22:44331943-G-A | 0.2556 | 0.1613 | 2.88E-02 | 1.785 | 0.207677049 |
| rs56373884 | rs926633   | 18935 | 0.895 | chr22:44337533 | 22:44337533-G-A | 0.2556 | 0.1613 | 2.88E-02 | 1.785 | 0.207677049 |
| rs56373884 | rs1010022  | 20158 | 0.895 | chr22:44336310 | 22:44336310-A-G | 0.2556 | 0.1613 | 2.88E-02 | 1.785 | 0.207677049 |
| rs2294921  | rs13055874 | 20170 | 0.895 | chr22:44341672 | 22:44341672-T-C | 0.2556 | 0.1613 | 2.88E-02 | 1.785 | 0.207677049 |
| rs2294921  | rs13055900 | 20176 | 0.895 | chr22:44341666 | 22:44341666-A-G | 0.2556 | 0.1613 | 2.88E-02 | 1.785 | 0.207677049 |
| rs2294921  | rs4823181  | 20236 | 0.895 | chr22:44341606 | 22:44341606-T-C | 0.2556 | 0.1613 | 2.88E-02 | 1.785 | 0.207677049 |
| rs56373884 | rs2073081  | 20724 | 0.895 | chr22:44335744 | 22:44335744-T-C | 0.2556 | 0.1613 | 2.88E-02 | 1.785 | 0.207677049 |
| rs2294921  | rs2294916  | 20920 | 0.83  | chr22:44340922 | 22:44340922-T-G | 0.2556 | 0.1613 | 2.88E-02 | 1.785 | 0.207677049 |
| rs56373884 | rs35621602 | 21062 | 0.895 | chr22:44335406 | 22:44335406-C-A | 0.2556 | 0.1613 | 2.88E-02 | 1.785 | 0.207677049 |
| rs56373884 | rs16991175 | 21137 | 0.836 | chr22:44335331 | 22:44335331-T-C | 0.2556 | 0.1613 | 2.88E-02 | 1.785 | 0.207677049 |
| rs2294921  | rs36069781 | 21756 | 0.895 | chr22:44340086 | 22:44340086-C-T | 0.2556 | 0.1613 | 2.88E-02 | 1.785 | 0.207677049 |
| rs2294921  | rs13056555 | 22316 | 0.895 | chr22:44339526 | 22:44339526-C-G | 0.2556 | 0.1613 | 2.88E-02 | 1.785 | 0.207677049 |
| rs56373884 | rs2896020  | 22500 | 0.895 | chr22:44333968 | 22:44333968-T-C | 0.2556 | 0.1613 | 2.88E-02 | 1.785 | 0.207677049 |
| rs56373884 | rs2401512  | 22523 | 0.895 | chr22:44333945 | 22:44333945-C-G | 0.2556 | 0.1613 | 2.88E-02 | 1.785 | 0.207677049 |
| rs56373884 | rs2896019  | 22774 | 0.895 | chr22:44333694 | a_rs2896019     | 0.2556 | 0.1613 | 2.88E-02 | 1.785 | 0.207677049 |
| rs56373884 | rs2072906  | 23296 | 0.895 | chr22:44333172 | 22:44333172-A-G | 0.2556 | 0.1613 | 2.88E-02 | 1.785 | 0.207677049 |
| rs56373884 | rs2281135  | 23898 | 0.895 | chr22:44332570 | a_exm-rs2281135 | 0.2556 | 0.1613 | 2.88E-02 | 1.785 | 0.207677049 |
| rs2294921  | rs926633   | 24309 | 0.895 | chr22:44337533 | 22:44337533-G-A | 0.2556 | 0.1613 | 2.88E-02 | 1.785 | 0.207677049 |
| rs56373884 | rs1883349  | 24525 | 0.895 | chr22:44331943 | 22:44331943-G-A | 0.2556 | 0.1613 | 2.88E-02 | 1.785 | 0.207677049 |
| rs2294921  | rs1010022  | 25532 | 0.895 | chr22:44336310 | 22:44336310-A-G | 0.2556 | 0.1613 | 2.88E-02 | 1.785 | 0.207677049 |
| rs2294921  | rs2073081  | 26098 | 0.895 | chr22:44335744 | 22:44335744-T-C | 0.2556 | 0.1613 | 2.88E-02 | 1.785 | 0.207677049 |
| rs2294921  | rs35621602 | 26436 | 0.895 | chr22:44335406 | 22:44335406-C-A | 0.2556 | 0.1613 | 2.88E-02 | 1.785 | 0.207677049 |
| rs3761472  | rs13055874 | 26450 | 0.895 | chr22:44341672 | 22:44341672-T-C | 0.2556 | 0.1613 | 2.88E-02 | 1.785 | 0.207677049 |
| rs3761472  | rs13055900 | 26456 | 0.895 | chr22:44341666 | 22:44341666-A-G | 0.2556 | 0.1613 | 2.88E-02 | 1.785 | 0.207677049 |
| rs2294921  | rs16991175 | 26511 | 0.836 | chr22:44335331 | 22:44335331-T-C | 0.2556 | 0.1613 | 2.88E-02 | 1.785 | 0.207677049 |
| rs3761472  | rs4823181  | 26516 | 0.895 | chr22:44341606 | 22:44341606-T-C | 0.2556 | 0.1613 | 2.88E-02 | 1.785 | 0.207677049 |
| rs3761472  | rs2294916  | 27200 | 0.83  | chr22:44340922 | 22:44340922-T-G | 0.2556 | 0.1613 | 2.88E-02 | 1.785 | 0.207677049 |
| rs2294921  | rs2896020  | 27874 | 0.895 | chr22:44333968 | 22:44333968-T-C | 0.2556 | 0.1613 | 2.88E-02 | 1.785 | 0.207677049 |
| rs2294921  | rs2401512  | 27897 | 0.895 | chr22:44333945 | 22:44333945-C-G | 0.2556 | 0.1613 | 2.88E-02 | 1.785 | 0.207677049 |
| rs3761472  | rs36069781 | 28036 | 0.895 | chr22:44340086 | 22:44340086-C-T | 0.2556 | 0.1613 | 2.88E-02 | 1.785 | 0.207677049 |
| rs2294921  | rs2896019  | 28148 | 0.895 | chr22:44333694 | a_rs2896019     | 0.2556 | 0.1613 | 2.88E-02 | 1.785 | 0.207677049 |
| rs3761472  | rs13056555 | 28596 | 0.895 | chr22:44339526 | 22:44339526-C-G | 0.2556 | 0.1613 | 2.88E-02 | 1.785 | 0.207677049 |
| rs2294921  | rs2072906  | 28670 | 0.895 | chr22:44333172 | 22:44333172-A-G | 0.2556 | 0.1613 | 2.88E-02 | 1.785 | 0.207677049 |
| rs2294921  | rs2281135  | 29272 | 0.895 | chr22:44332570 | a_exm-rs2281135 | 0.2556 | 0.1613 | 2.88E-02 | 1.785 | 0.207677049 |
| rs2294921  | rs1883349  | 29899 | 0.895 | chr22:44331943 | 22:44331943-G-A | 0.2556 | 0.1613 | 2.88E-02 | 1.785 | 0.207677049 |
| rs3761472  | rs926633   | 30589 | 0.895 | chr22:44337533 | 22:44337533-G-A | 0.2556 | 0.1613 | 2.88E-02 | 1.785 | 0.207677049 |
| rs3761472  | rs1010022  | 31812 | 0.895 | chr22:44336310 | 22:44336310-A-G | 0.2556 | 0.1613 | 2.88E-02 | 1.785 | 0.207677049 |
| rs3761472  | rs2073081  | 32378 | 0.895 | chr22:44335744 | 22:44335744-T-C | 0.2556 | 0.1613 | 2.88E-02 | 1.785 | 0.207677049 |
| rs3761472  | rs35621602 | 32716 | 0.895 | chr22:44335406 | 22:44335406-C-A | 0.2556 | 0.1613 | 2.88E-02 | 1.785 | 0.207677049 |
| rs3761472  | rs16991175 | 32791 | 0.836 | chr22:44335331 | 22:44335331-T-C | 0.2556 | 0.1613 | 2.88E-02 | 1.785 | 0.207677049 |
| rs3761472  | rs2896020  | 34154 | 0.895 | chr22:44333968 | 22:44333968-T-C | 0.2556 | 0.1613 | 2.88E-02 | 1.785 | 0.207677049 |
| rs3761472  | rs2401512  | 34177 | 0.895 | chr22:44333945 | 22:44333945-C-G | 0.2556 | 0.1613 | 2.88E-02 | 1.785 | 0.207677049 |
| rs3761472  | rs2896019  | 34428 | 0.895 | chr22:44333694 | a_rs2896019     | 0.2556 | 0.1613 | 2.88E-02 | 1.785 | 0.207677049 |
| rs3761472  | rs2072906  | 34950 | 0.895 | chr22:44333172 | 22:44333172-A-G | 0.2556 | 0.1613 | 2.88E-02 | 1.785 | 0.207677049 |
| rs3761472  | rs2281135  | 35552 | 0.895 | chr22:44332570 | a_exm-rs2281135 | 0.2556 | 0.1613 | 2.88E-02 | 1.785 | 0.207677049 |
| rs3761472  | rs1883349  | 36179 | 0.895 | chr22:44331943 | 22:44331943-G-A | 0.2556 | 0.1613 | 2.88E-02 | 1.785 | 0.207677049 |
| rs36038527 | rs36038527 | 0     | 1     | chr22:44332888 | 22:44332888-T-C | 0.2556 | 0.1613 | 2.88E-02 | 1.785 | 0.207677049 |
| rs4823182  | rs4823182  | 0     | 1     | chr22:44377442 | 22:44377442-A-G | 0.4278 | 0.3172 | 3.09E-02 | 1.609 | 0.371593443 |
| rs67450864 | rs67450864 | 0     | 1     | chr22:44376335 | 22:44376335-C-T | 0.4278 | 0.3172 | 3.09E-02 | 1.609 | 0.371593443 |
| rs4823182  | rs67450864 | 1107  | 0.872 | chr22:44376335 | 22:44376335-C-T | 0.4278 | 0.3172 | 3.09E-02 | 1.609 | 0.371593443 |
| rs67450864 | rs4823182  | 1107  | 0.872 | chr22:44377442 | 22:44377442-A-G | 0.4278 | 0.3172 | 3.09E-02 | 1.609 | 0.371593443 |
| rs6006602  | rs4823182  | 5958  | 0.872 | chr22:44377442 | 22:44377442-A-G | 0.4278 | 0.3172 | 3.09E-02 | 1.609 | 0.371593443 |
| rs6006468  | rs4823182  | 5990  | 0.872 | chr22:44377442 | 22:44377442-A-G | 0.4278 | 0.3172 | 3.09E-02 | 1.609 | 0.371593443 |
| rs6006469  | rs4823182  | 6175  | 0.872 | chr22:44377442 | 22:44377442-A-G | 0.4278 | 0.3172 | 3.09E-02 | 1.609 | 0.371593443 |
| rs6006602  | rs67450864 | 7065  | 0.872 | chr22:44376335 | 22:44376335-C-T | 0.4278 | 0.3172 | 3.09E-02 | 1.609 | 0.371593443 |
| rs6006468  | rs67450864 | 7097  | 0.872 | chr22:44376335 | 22:44376335-C-T | 0.4278 | 0.3172 | 3.09E-02 | 1.609 | 0.371593443 |
| rs6006469  | rs67450864 | 7282  | 0.872 | chr22:44376335 | 22:44376335-C-T | 0.4278 | 0.3172 | 3.09E-02 | 1.609 | 0.371593443 |
| rs3788604  | rs4823182  | 10975 | 0.872 | chr22:44377442 | 22:44377442-A-G | 0.4278 | 0.3172 | 3.09E-02 | 1.609 | 0.371593443 |
| rs3788604  | rs67450864 | 12082 | 0.872 | chr22:44376335 | 22:44376335-C-T | 0.4278 | 0.3172 | 3.09E-02 | 1.609 | 0.371593443 |
| rs6006473  | rs4823182  | 15633 | 0.872 | chr22:44377442 | 22:44377442-A-G | 0.4278 | 0.3172 | 3.09E-02 | 1.609 | 0.371593443 |
| rs6006473  | rs67450864 | 16740 | 0.872 | chr22:44376335 | 22:44376335-C-T | 0.4278 | 0.3172 | 3.09E-02 | 1.609 | 0.371593443 |
| rs2281292  | rs4823182  | 17947 | 0.872 | chr22:44377442 | 22:44377442-A-G | 0.4278 | 0.3172 | 3.09E-02 | 1.609 | 0.371593443 |
| rs1007863  | rs4823182  | 18009 | 0.872 | chr22:44377442 | 22:44377442-A-G | 0.4278 | 0.3172 | 3.09E-02 | 1.609 | 0.371593443 |
| rs2281292  | rs67450864 | 19054 | 0.872 | chr22:44376335 | 22:44376335-C-T | 0.4278 | 0.3172 | 3.09E-02 | 1.609 | 0.371593443 |
| rs1007863  | rs67450864 | 19116 | 0.872 | chr22:44376335 | 22:44376335-C-T | 0.4278 | 0.3172 | 3.09E-02 | 1.609 | 0.371593443 |
| rs3788604  | rs3788604  | 0     | 1     | chr22:44388417 | 22:44388417-A-G | 0.4889 | 0.3763 | 3.48E-02 | 1.585 | 0.431677049 |
| rs6006468  | rs6006468  | 0     | 1     | chr22:44383432 | 22:44383432-G-C | 0.4889 | 0.3763 | 3.48E-02 | 1.585 | 0.431677049 |
| rs6006602  | rs6006468  |       |       |                |                 |        |        |          |       |             |



|            |            |       |       |                |                 |        |        |          |       |             |
|------------|------------|-------|-------|----------------|-----------------|--------|--------|----------|-------|-------------|
| rs35621602 | rs36055245 | 8214  | 0.843 | chr22:44327192 | 22:44327192-A-G | 0.2444 | 0.1559 | 3.69E-02 | 1.752 | 0.19942459  |
| rs34352134 | rs36055245 | 8224  | 0.843 | chr22:44327192 | 22:44327192-A-G | 0.2444 | 0.1559 | 3.69E-02 | 1.752 | 0.19942459  |
| rs2073081  | rs36055245 | 8552  | 0.843 | chr22:44326700 | 22:44327192-A-G | 0.2444 | 0.1559 | 3.69E-02 | 1.752 | 0.19942459  |
| rs35621602 | rs11090617 | 8706  | 0.843 | chr22:44326700 | 22:44326700-C-T | 0.2444 | 0.1559 | 3.69E-02 | 1.752 | 0.19942459  |
| rs34352134 | rs11090617 | 8716  | 0.843 | chr22:44326700 | 22:44326700-C-T | 0.2444 | 0.1559 | 3.69E-02 | 1.752 | 0.19942459  |
| rs1010023  | rs36055245 | 8906  | 0.843 | chr22:44327192 | 22:44327192-A-G | 0.2444 | 0.1559 | 3.69E-02 | 1.752 | 0.19942459  |
| rs2073081  | rs11090617 | 9044  | 0.843 | chr22:44326700 | 22:44326700-C-T | 0.2444 | 0.1559 | 3.69E-02 | 1.752 | 0.19942459  |
| rs1010022  | rs36055245 | 9118  | 0.843 | chr22:44327192 | 22:44327192-A-G | 0.2444 | 0.1559 | 3.69E-02 | 1.752 | 0.19942459  |
| rs35621602 | rs9625962  | 9134  | 0.843 | chr22:44326272 | 22:44326272-T-C | 0.2444 | 0.1559 | 3.69E-02 | 1.752 | 0.19942459  |
| rs34352134 | rs9625962  | 9144  | 0.843 | chr22:44326272 | 22:44326272-T-C | 0.2444 | 0.1559 | 3.69E-02 | 1.752 | 0.19942459  |
| rs1010023  | rs11090617 | 9398  | 0.843 | chr22:44326700 | 22:44326700-C-T | 0.2444 | 0.1559 | 3.69E-02 | 1.752 | 0.19942459  |
| rs35621602 | rs12483959 | 9410  | 0.843 | chr22:44325996 | a_rs12483959    | 0.2444 | 0.1559 | 3.69E-02 | 1.752 | 0.19942459  |
| rs34352134 | rs12483959 | 9420  | 0.843 | chr22:44325996 | a_rs12483959    | 0.2444 | 0.1559 | 3.69E-02 | 1.752 | 0.19942459  |
| rs2073081  | rs9625962  | 9472  | 0.843 | chr22:44326272 | 22:44326272-T-C | 0.2444 | 0.1559 | 3.69E-02 | 1.752 | 0.19942459  |
| rs1010022  | rs11090617 | 9610  | 0.843 | chr22:44326700 | 22:44326700-C-T | 0.2444 | 0.1559 | 3.69E-02 | 1.752 | 0.19942459  |
| rs2073081  | rs12483959 | 9748  | 0.843 | chr22:44325996 | a_rs12483959    | 0.2444 | 0.1559 | 3.69E-02 | 1.752 | 0.19942459  |
| rs73176497 | rs36055245 | 9765  | 0.843 | chr22:44327192 | 22:44327192-A-G | 0.2444 | 0.1559 | 3.69E-02 | 1.752 | 0.19942459  |
| rs1010023  | rs9625962  | 9826  | 0.843 | chr22:44326272 | 22:44326272-T-C | 0.2444 | 0.1559 | 3.69E-02 | 1.752 | 0.19942459  |
| rs1010022  | rs9625962  | 10038 | 0.843 | chr22:44326272 | 22:44326272-T-C | 0.2444 | 0.1559 | 3.69E-02 | 1.752 | 0.19942459  |
| rs1010023  | rs12483959 | 10102 | 0.843 | chr22:44325996 | a_rs12483959    | 0.2444 | 0.1559 | 3.69E-02 | 1.752 | 0.19942459  |
| rs73176497 | rs11090617 | 10257 | 0.843 | chr22:44326700 | 22:44326700-C-T | 0.2444 | 0.1559 | 3.69E-02 | 1.752 | 0.19942459  |
| rs1010022  | rs12483959 | 10314 | 0.843 | chr22:44325996 | a_rs12483959    | 0.2444 | 0.1559 | 3.69E-02 | 1.752 | 0.19942459  |
| rs926633   | rs36055245 | 10341 | 0.843 | chr22:44327192 | 22:44327192-A-G | 0.2444 | 0.1559 | 3.69E-02 | 1.752 | 0.19942459  |
| rs73176497 | rs9625962  | 10685 | 0.843 | chr22:44326272 | 22:44326272-T-C | 0.2444 | 0.1559 | 3.69E-02 | 1.752 | 0.19942459  |
| rs926633   | rs11090617 | 10833 | 0.843 | chr22:44326700 | 22:44326700-C-T | 0.2444 | 0.1559 | 3.69E-02 | 1.752 | 0.19942459  |
| rs73176497 | rs12483959 | 10961 | 0.843 | chr22:44325996 | a_rs12483959    | 0.2444 | 0.1559 | 3.69E-02 | 1.752 | 0.19942459  |
| rs926633   | rs9625962  | 11261 | 0.843 | chr22:44326272 | 22:44326272-T-C | 0.2444 | 0.1559 | 3.69E-02 | 1.752 | 0.19942459  |
| rs926633   | rs12483959 | 11537 | 0.843 | chr22:44325996 | a_rs12483959    | 0.2444 | 0.1559 | 3.69E-02 | 1.752 | 0.19942459  |
| rs13056555 | rs36055245 | 12334 | 0.843 | chr22:44327192 | 22:44327192-A-G | 0.2444 | 0.1559 | 3.69E-02 | 1.752 | 0.19942459  |
| rs13056555 | rs11090617 | 12826 | 0.843 | chr22:44326700 | 22:44326700-C-T | 0.2444 | 0.1559 | 3.69E-02 | 1.752 | 0.19942459  |
| rs36069781 | rs36055245 | 12894 | 0.843 | chr22:44327192 | 22:44327192-A-G | 0.2444 | 0.1559 | 3.69E-02 | 1.752 | 0.19942459  |
| rs13056555 | rs9625962  | 13254 | 0.843 | chr22:44326272 | 22:44326272-T-C | 0.2444 | 0.1559 | 3.69E-02 | 1.752 | 0.19942459  |
| rs36069781 | rs11090617 | 13386 | 0.843 | chr22:44326700 | 22:44326700-C-T | 0.2444 | 0.1559 | 3.69E-02 | 1.752 | 0.19942459  |
| rs13056555 | rs12483959 | 13530 | 0.843 | chr22:44325996 | a_rs12483959    | 0.2444 | 0.1559 | 3.69E-02 | 1.752 | 0.19942459  |
| rs2294916  | rs16991158 | 13743 | 0.823 | chr22:44327179 | 22:44327179-G-A | 0.2444 | 0.1559 | 3.69E-02 | 1.752 | 0.19942459  |
| rs36069781 | rs9625962  | 13814 | 0.843 | chr22:44326272 | 22:44326272-T-C | 0.2444 | 0.1559 | 3.69E-02 | 1.752 | 0.19942459  |
| rs4823179  | rs36055245 | 14001 | 0.843 | chr22:44327192 | 22:44327192-A-G | 0.2444 | 0.1559 | 3.69E-02 | 1.752 | 0.19942459  |
| rs36069781 | rs12483959 | 14090 | 0.843 | chr22:44325996 | a_rs12483959    | 0.2444 | 0.1559 | 3.69E-02 | 1.752 | 0.19942459  |
| rs4823180  | rs36055245 | 14106 | 0.843 | chr22:44327192 | 22:44327192-A-G | 0.2444 | 0.1559 | 3.69E-02 | 1.752 | 0.19942459  |
| rs4823181  | rs36055245 | 14414 | 0.843 | chr22:44327192 | 22:44327192-A-G | 0.2444 | 0.1559 | 3.69E-02 | 1.752 | 0.19942459  |
| rs13055900 | rs36055245 | 14474 | 0.843 | chr22:44327192 | 22:44327192-A-G | 0.2444 | 0.1559 | 3.69E-02 | 1.752 | 0.19942459  |
| rs13055874 | rs36055245 | 14480 | 0.843 | chr22:44327192 | 22:44327192-A-G | 0.2444 | 0.1559 | 3.69E-02 | 1.752 | 0.19942459  |
| rs4823179  | rs11090617 | 14493 | 0.843 | chr22:44326700 | 22:44326700-C-T | 0.2444 | 0.1559 | 3.69E-02 | 1.752 | 0.19942459  |
| rs4823180  | rs11090617 | 14598 | 0.843 | chr22:44326700 | 22:44326700-C-T | 0.2444 | 0.1559 | 3.69E-02 | 1.752 | 0.19942459  |
| rs4823181  | rs11090617 | 14906 | 0.843 | chr22:44326700 | 22:44326700-C-T | 0.2444 | 0.1559 | 3.69E-02 | 1.752 | 0.19942459  |
| rs4823179  | rs9625962  | 14921 | 0.843 | chr22:44326272 | 22:44326272-T-C | 0.2444 | 0.1559 | 3.69E-02 | 1.752 | 0.19942459  |
| rs13055900 | rs11090617 | 14966 | 0.843 | chr22:44326700 | 22:44326700-C-T | 0.2444 | 0.1559 | 3.69E-02 | 1.752 | 0.19942459  |
| rs13055874 | rs11090617 | 14972 | 0.843 | chr22:44326700 | 22:44326700-C-T | 0.2444 | 0.1559 | 3.69E-02 | 1.752 | 0.19942459  |
| rs4823180  | rs9625962  | 15026 | 0.843 | chr22:44326272 | 22:44326272-T-C | 0.2444 | 0.1559 | 3.69E-02 | 1.752 | 0.19942459  |
| rs4823179  | rs12483959 | 15197 | 0.843 | chr22:44325996 | a_rs12483959    | 0.2444 | 0.1559 | 3.69E-02 | 1.752 | 0.19942459  |
| rs4823180  | rs12483959 | 15302 | 0.843 | chr22:44325996 | a_rs12483959    | 0.2444 | 0.1559 | 3.69E-02 | 1.752 | 0.19942459  |
| rs4823181  | rs9625962  | 15334 | 0.843 | chr22:44326272 | 22:44326272-T-C | 0.2444 | 0.1559 | 3.69E-02 | 1.752 | 0.19942459  |
| rs13055900 | rs9625962  | 15394 | 0.843 | chr22:44326272 | 22:44326272-T-C | 0.2444 | 0.1559 | 3.69E-02 | 1.752 | 0.19942459  |
| rs13055874 | rs9625962  | 15400 | 0.843 | chr22:44326272 | 22:44326272-T-C | 0.2444 | 0.1559 | 3.69E-02 | 1.752 | 0.19942459  |
| rs4823181  | rs12483959 | 15610 | 0.843 | chr22:44325996 | a_rs12483959    | 0.2444 | 0.1559 | 3.69E-02 | 1.752 | 0.19942459  |
| rs13055900 | rs12483959 | 15670 | 0.843 | chr22:44325996 | a_rs12483959    | 0.2444 | 0.1559 | 3.69E-02 | 1.752 | 0.19942459  |
| rs13055874 | rs12483959 | 15676 | 0.843 | chr22:44325996 | a_rs12483959    | 0.2444 | 0.1559 | 3.69E-02 | 1.752 | 0.19942459  |
| rs2008451  | rs36055245 | 15777 | 0.843 | chr22:44327192 | 22:44327192-A-G | 0.2444 | 0.1559 | 3.69E-02 | 1.752 | 0.19942459  |
| rs2008451  | rs11090617 | 16269 | 0.843 | chr22:44326700 | 22:44326700-C-T | 0.2444 | 0.1559 | 3.69E-02 | 1.752 | 0.19942459  |
| rs2008451  | rs9625962  | 16697 | 0.843 | chr22:44326272 | 22:44326272-T-C | 0.2444 | 0.1559 | 3.69E-02 | 1.752 | 0.19942459  |
| rs2008451  | rs12483959 | 16973 | 0.843 | chr22:44325996 | a_rs12483959    | 0.2444 | 0.1559 | 3.69E-02 | 1.752 | 0.19942459  |
| rs56373884 | rs36055245 | 29276 | 0.83  | chr22:44327192 | 22:44327192-A-G | 0.2444 | 0.1559 | 3.69E-02 | 1.752 | 0.19942459  |
| rs56373884 | rs11090617 | 29768 | 0.83  | chr22:44326700 | 22:44326700-C-T | 0.2444 | 0.1559 | 3.69E-02 | 1.752 | 0.19942459  |
| rs56373884 | rs9625962  | 30196 | 0.83  | chr22:44326272 | 22:44326272-T-C | 0.2444 | 0.1559 | 3.69E-02 | 1.752 | 0.19942459  |
| rs56373884 | rs12483959 | 30472 | 0.83  | chr22:44325996 | a_rs12483959    | 0.2444 | 0.1559 | 3.69E-02 | 1.752 | 0.19942459  |
| rs2294921  | rs36055245 | 34650 | 0.83  | chr22:44327192 | 22:44327192-A-G | 0.2444 | 0.1559 | 3.69E-02 | 1.752 | 0.19942459  |
| rs2294921  | rs11090617 | 35142 | 0.83  | chr22:44326700 | 22:44326700-C-T | 0.2444 | 0.1559 | 3.69E-02 | 1.752 | 0.19942459  |
| rs2294921  | rs9625962  | 35570 | 0.83  | chr22:44326272 | 22:44326272-T-C | 0.2444 | 0.1559 | 3.69E-02 | 1.752 | 0.19942459  |
| rs2294921  | rs12483959 | 35846 | 0.83  | chr22:44325996 | a_rs12483959    | 0.2444 | 0.1559 | 3.69E-02 | 1.752 | 0.19942459  |
| rs3761472  | rs36055245 | 40930 | 0.83  | chr22:44327192 | 22:44327192-A-G | 0.2444 | 0.1559 | 3.69E-02 | 1.752 | 0.19942459  |
| rs3761472  | rs11090617 | 41422 | 0.83  | chr22:44326700 | 22:44326700-C-T | 0.2444 | 0.1559 | 3.69E-02 | 1.752 | 0.19942459  |
| rs3761472  | rs9625962  | 41850 | 0.83  | chr22:44326272 | 22:44326272-T-C | 0.2444 | 0.1559 | 3.69E-02 | 1.752 | 0.19942459  |
| rs3761472  | rs12483959 | 42126 | 0.83  | chr22:44325996 | a_rs12483959    | 0.2444 | 0.1559 | 3.69E-02 | 1.752 | 0.19942459  |
| rs12484466 | rs12484466 | 0     | 1     | chr22:44330213 | 22:44330213-A-G | 0.25   | 0.1613 | 3.88E-02 | 1.733 | 0.204922951 |
| rs2235776  | rs2235776  | 0     | 1     | chr22:44377999 | 22:44377999-C-T | 0.2167 | 0.1344 | 4.01E-02 | 1.781 | 0.17487541  |
| rs2235777  | rs2235777  | 0     | 1     | chr22:44378809 | 22:44378809-C-T | 0.2167 | 0.1344 | 4.01E-02 | 1.781 | 0.17487541  |
| rs2294923  | rs2294923  | 0     | 1     | chr22:44379740 | 22:44379740-C-A | 0.2167 | 0.1344 | 4.01E-02 | 1.781 | 0.17487541  |
| rs61473277 | rs61473277 | 0     | 1     | chr22:44371406 | 22:44371406-A-G | 0.2167 | 0.1344 | 4.01E-02 | 1.781 | 0.17487541  |
| rs9626079  | rs9626079  | 0     | 1     | chr22:44380009 | 22:44380009-A-G | 0.2167 | 0.1344 | 4.01E-02 | 1.781 | 0.17487541  |
| rs2294923  | rs9626079  | 269   | 1     | chr22:44380009 | 22:44380009-A-G | 0.2167 | 0.1344 | 4.01E-02 | 1.781 | 0.17487541  |
| rs9626079  | rs2294923  | 269   | 1     | chr22:44379740 | 22:44379740-C-A | 0.2167 | 0.1344 | 4.01E-02 | 1.781 | 0.17487541  |
| rs2235776  | rs2235777  | 810   | 1     | chr22:44378809 | 22:44378809-C-T | 0.2167 | 0.1344 | 4.01E-02 | 1.781 | 0.17487541  |
| rs2235777  | rs2235776  | 810   | 1     | chr22:44377999 | 22:44377999-C-T | 0.2167 | 0.1344 | 4.01E-02 | 1.781 | 0.17487541  |
| rs2235777  | rs2294923  | 931   | 1     | chr22:44379740 | 22:44379740-C-A | 0.2167 | 0.1344 | 4.01E-02 | 1.781 | 0.17487541  |
| rs2294923  | rs2235777  | 931   | 1     | chr22:44378809 | 22:44378809-C-T | 0.2167 | 0.1344 | 4.01E-02 | 1.781 | 0.17487541  |
| rs2235777  | rs9626079  | 1200  |       |                |                 |        |        |          |       |             |

|            |            |       |       |                |                 |        |        |          |       |             |
|------------|------------|-------|-------|----------------|-----------------|--------|--------|----------|-------|-------------|
| rs9626079  | rs61473277 | 8603  | 1     | chr22:44371406 | 22:44371406-A-G | 0.2167 | 0.1344 | 4.01E-02 | 1.781 | 0.17487541  |
| rs2294921  | rs61473277 | 9564  | 0.887 | chr22:44371406 | 22:44371406-A-G | 0.2167 | 0.1344 | 4.01E-02 | 1.781 | 0.17487541  |
| rs3761472  | rs2235776  | 9877  | 0.887 | chr22:44377999 | 22:44377999-C-T | 0.2167 | 0.1344 | 4.01E-02 | 1.781 | 0.17487541  |
| rs4823108  | rs61473277 | 9934  | 1     | chr22:44371406 | 22:44371406-A-G | 0.2167 | 0.1344 | 4.01E-02 | 1.781 | 0.17487541  |
| rs4823109  | rs61473277 | 10076 | 1     | chr22:44371406 | 22:44371406-A-G | 0.2167 | 0.1344 | 4.01E-02 | 1.781 | 0.17487541  |
| rs3761472  | rs2235776  | 10687 | 0.887 | chr22:44378809 | 22:44378809-C-T | 0.2167 | 0.1344 | 4.01E-02 | 1.781 | 0.17487541  |
| rs3761472  | rs2294923  | 11618 | 0.887 | chr22:44379740 | 22:44379740-C-A | 0.2167 | 0.1344 | 4.01E-02 | 1.781 | 0.17487541  |
| rs3761472  | rs9626079  | 11887 | 0.887 | chr22:44380009 | 22:44380009-A-G | 0.2167 | 0.1344 | 4.01E-02 | 1.781 | 0.17487541  |
| rs56373884 | rs61473277 | 14938 | 0.887 | chr22:44371406 | 22:44371406-A-G | 0.2167 | 0.1344 | 4.01E-02 | 1.781 | 0.17487541  |
| rs2294921  | rs2235776  | 16157 | 0.887 | chr22:44377999 | 22:44377999-C-T | 0.2167 | 0.1344 | 4.01E-02 | 1.781 | 0.17487541  |
| rs2294921  | rs2235776  | 16967 | 0.887 | chr22:44378809 | 22:44378809-C-T | 0.2167 | 0.1344 | 4.01E-02 | 1.781 | 0.17487541  |
| rs2294921  | rs2294923  | 17898 | 0.887 | chr22:44379740 | 22:44379740-C-A | 0.2167 | 0.1344 | 4.01E-02 | 1.781 | 0.17487541  |
| rs2294921  | rs9626079  | 18167 | 0.887 | chr22:44380009 | 22:44380009-A-G | 0.2167 | 0.1344 | 4.01E-02 | 1.781 | 0.17487541  |
| rs56373884 | rs2235776  | 21531 | 0.887 | chr22:44377999 | 22:44377999-C-T | 0.2167 | 0.1344 | 4.01E-02 | 1.781 | 0.17487541  |
| rs1474745  | rs61473277 | 22170 | 0.838 | chr22:44371406 | 22:44371406-A-G | 0.2167 | 0.1344 | 4.01E-02 | 1.781 | 0.17487541  |
| rs56373884 | rs2235776  | 22341 | 0.887 | chr22:44378809 | 22:44378809-C-T | 0.2167 | 0.1344 | 4.01E-02 | 1.781 | 0.17487541  |
| rs34912062 | rs61473277 | 22960 | 0.838 | chr22:44371406 | 22:44371406-A-G | 0.2167 | 0.1344 | 4.01E-02 | 1.781 | 0.17487541  |
| rs56373884 | rs2294923  | 23272 | 0.887 | chr22:44379740 | 22:44379740-C-A | 0.2167 | 0.1344 | 4.01E-02 | 1.781 | 0.17487541  |
| rs56373884 | rs9626079  | 23541 | 0.887 | chr22:44380009 | 22:44380009-A-G | 0.2167 | 0.1344 | 4.01E-02 | 1.781 | 0.17487541  |
| rs2092501  | rs61473277 | 24155 | 0.838 | chr22:44371406 | 22:44371406-A-G | 0.2167 | 0.1344 | 4.01E-02 | 1.781 | 0.17487541  |
| rs1474745  | rs2235776  | 28763 | 0.838 | chr22:44377999 | 22:44377999-C-T | 0.2167 | 0.1344 | 4.01E-02 | 1.781 | 0.17487541  |
| rs34912062 | rs2235776  | 29553 | 0.838 | chr22:44377999 | 22:44377999-C-T | 0.2167 | 0.1344 | 4.01E-02 | 1.781 | 0.17487541  |
| rs1474745  | rs2235776  | 29573 | 0.838 | chr22:44378809 | 22:44378809-C-T | 0.2167 | 0.1344 | 4.01E-02 | 1.781 | 0.17487541  |
| rs34912062 | rs2235776  | 30363 | 0.838 | chr22:44378809 | 22:44378809-C-T | 0.2167 | 0.1344 | 4.01E-02 | 1.781 | 0.17487541  |
| rs1474745  | rs2294923  | 30504 | 0.838 | chr22:44379740 | 22:44379740-C-A | 0.2167 | 0.1344 | 4.01E-02 | 1.781 | 0.17487541  |
| rs2092501  | rs2235776  | 30748 | 0.838 | chr22:44377999 | 22:44377999-C-T | 0.2167 | 0.1344 | 4.01E-02 | 1.781 | 0.17487541  |
| rs1474745  | rs9626079  | 30773 | 0.838 | chr22:44380009 | 22:44380009-A-G | 0.2167 | 0.1344 | 4.01E-02 | 1.781 | 0.17487541  |
| rs34912062 | rs2294923  | 31294 | 0.838 | chr22:44379740 | 22:44379740-C-A | 0.2167 | 0.1344 | 4.01E-02 | 1.781 | 0.17487541  |
| rs2092501  | rs2235776  | 31558 | 0.838 | chr22:44378809 | 22:44378809-C-T | 0.2167 | 0.1344 | 4.01E-02 | 1.781 | 0.17487541  |
| rs34912062 | rs9626079  | 31563 | 0.838 | chr22:44380009 | 22:44380009-A-G | 0.2167 | 0.1344 | 4.01E-02 | 1.781 | 0.17487541  |
| rs2092501  | rs2294923  | 32489 | 0.838 | chr22:44379740 | 22:44379740-C-A | 0.2167 | 0.1344 | 4.01E-02 | 1.781 | 0.17487541  |
| rs2092501  | rs9626079  | 32758 | 0.838 | chr22:44380009 | 22:44380009-A-G | 0.2167 | 0.1344 | 4.01E-02 | 1.781 | 0.17487541  |
| rs1007863  | rs1007863  | 0     | 1     | chr22:44395451 | exm1616070      | 0.4833 | 0.3763 | 4.48E-02 | 1.55  | 0.428922951 |
| rs2281292  | rs2281292  | 0     | 1     | chr22:44395389 | 22:44395389-A-C | 0.4833 | 0.3763 | 4.48E-02 | 1.55  | 0.428922951 |
| rs1007863  | rs2281292  | 62    | 1     | chr22:44395389 | 22:44395389-A-C | 0.4833 | 0.3763 | 4.48E-02 | 1.55  | 0.428922951 |
| rs2281292  | rs1007863  | 62    | 1     | chr22:44395451 | exm1616070      | 0.4833 | 0.3763 | 4.48E-02 | 1.55  | 0.428922951 |
| rs6006473  | rs2281292  | 2314  | 1     | chr22:44395389 | 22:44395389-A-C | 0.4833 | 0.3763 | 4.48E-02 | 1.55  | 0.428922951 |
| rs6006473  | rs1007863  | 2376  | 1     | chr22:44395451 | exm1616070      | 0.4833 | 0.3763 | 4.48E-02 | 1.55  | 0.428922951 |
| rs2235778  | rs2281292  | 5875  | 0.902 | chr22:44395389 | 22:44395389-A-C | 0.4833 | 0.3763 | 4.48E-02 | 1.55  | 0.428922951 |
| rs2235778  | rs1007863  | 5937  | 0.902 | chr22:44395451 | exm1616070      | 0.4833 | 0.3763 | 4.48E-02 | 1.55  | 0.428922951 |
| rs3788604  | rs2281292  | 6972  | 1     | chr22:44395389 | 22:44395389-A-C | 0.4833 | 0.3763 | 4.48E-02 | 1.55  | 0.428922951 |
| rs3788604  | rs1007863  | 7034  | 1     | chr22:44395451 | exm1616070      | 0.4833 | 0.3763 | 4.48E-02 | 1.55  | 0.428922951 |
| rs6006469  | rs2281292  | 11772 | 1     | chr22:44395389 | 22:44395389-A-C | 0.4833 | 0.3763 | 4.48E-02 | 1.55  | 0.428922951 |
| rs6006469  | rs1007863  | 11834 | 1     | chr22:44395451 | exm1616070      | 0.4833 | 0.3763 | 4.48E-02 | 1.55  | 0.428922951 |
| rs6006468  | rs2281292  | 11957 | 1     | chr22:44395389 | 22:44395389-A-C | 0.4833 | 0.3763 | 4.48E-02 | 1.55  | 0.428922951 |
| rs6006602  | rs2281292  | 11989 | 1     | chr22:44395389 | 22:44395389-A-C | 0.4833 | 0.3763 | 4.48E-02 | 1.55  | 0.428922951 |
| rs6006468  | rs1007863  | 12019 | 1     | chr22:44395451 | exm1616070      | 0.4833 | 0.3763 | 4.48E-02 | 1.55  | 0.428922951 |
| rs6006602  | rs1007863  | 12051 | 1     | chr22:44395451 | exm1616070      | 0.4833 | 0.3763 | 4.48E-02 | 1.55  | 0.428922951 |
| rs4823182  | rs2281292  | 17947 | 0.872 | chr22:44395389 | 22:44395389-A-C | 0.4833 | 0.3763 | 4.48E-02 | 1.55  | 0.428922951 |
| rs4823182  | rs1007863  | 18009 | 0.872 | chr22:44395451 | exm1616070      | 0.4833 | 0.3763 | 4.48E-02 | 1.55  | 0.428922951 |
| rs67450864 | rs2281292  | 19054 | 0.872 | chr22:44395389 | 22:44395389-A-C | 0.4833 | 0.3763 | 4.48E-02 | 1.55  | 0.428922951 |
| rs67450864 | rs1007863  | 19116 | 0.872 | chr22:44395451 | exm1616070      | 0.4833 | 0.3763 | 4.48E-02 | 1.55  | 0.428922951 |
| rs6006469  | rs6006469  | 185   | 1     | chr22:44383617 | 22:44383617-C-G | 0.4889 | 0.3817 | 4.51E-02 | 1.549 | 0.434421311 |
| rs6006468  | rs6006469  | 0     | 1     | chr22:44383617 | 22:44383617-C-G | 0.4889 | 0.3817 | 4.51E-02 | 1.549 | 0.434421311 |
| rs6006602  | rs6006469  | 217   | 1     | chr22:44383617 | 22:44383617-C-G | 0.4889 | 0.3817 | 4.51E-02 | 1.549 | 0.434421311 |
| rs3788604  | rs6006469  | 4800  | 1     | chr22:44383617 | 22:44383617-C-G | 0.4889 | 0.3817 | 4.51E-02 | 1.549 | 0.434421311 |
| rs2235778  | rs6006469  | 5897  | 0.902 | chr22:44383617 | 22:44383617-C-G | 0.4889 | 0.3817 | 4.51E-02 | 1.549 | 0.434421311 |
| rs4823182  | rs6006469  | 6175  | 0.872 | chr22:44383617 | 22:44383617-C-G | 0.4889 | 0.3817 | 4.51E-02 | 1.549 | 0.434421311 |
| rs67450864 | rs6006469  | 7282  | 0.872 | chr22:44383617 | 22:44383617-C-G | 0.4889 | 0.3817 | 4.51E-02 | 1.549 | 0.434421311 |
| rs6006473  | rs6006469  | 9458  | 1     | chr22:44383617 | 22:44383617-C-G | 0.4889 | 0.3817 | 4.51E-02 | 1.549 | 0.434421311 |
| rs2281292  | rs6006469  | 11772 | 1     | chr22:44383617 | 22:44383617-C-G | 0.4889 | 0.3817 | 4.51E-02 | 1.549 | 0.434421311 |
| rs1007863  | rs6006469  | 11834 | 1     | chr22:44383617 | 22:44383617-C-G | 0.4889 | 0.3817 | 4.51E-02 | 1.549 | 0.434421311 |
| rs2092501  | rs2092501  | 0     | 1     | chr22:44347251 | 22:44347251-G-A | 0.2389 | 0.1559 | 4.94E-02 | 1.699 | 0.196719672 |
| rs34912062 | rs34912062 | 0     | 1     | chr22:44348446 | 22:44348446-G-T | 0.2389 | 0.1559 | 4.94E-02 | 1.699 | 0.196719672 |
| rs1474745  | rs34912062 | 790   | 1     | chr22:44348446 | 22:44348446-G-T | 0.2389 | 0.1559 | 4.94E-02 | 1.699 | 0.196719672 |
| rs2092501  | rs34912062 | 1195  | 1     | chr22:44348446 | 22:44348446-G-T | 0.2389 | 0.1559 | 4.94E-02 | 1.699 | 0.196719672 |
| rs34912062 | rs2092501  | 1195  | 1     | chr22:44347251 | 22:44347251-G-A | 0.2389 | 0.1559 | 4.94E-02 | 1.699 | 0.196719672 |
| rs1474745  | rs2092501  | 1985  | 1     | chr22:44347251 | 22:44347251-G-A | 0.2389 | 0.1559 | 4.94E-02 | 1.699 | 0.196719672 |
| rs2008451  | rs2092501  | 4282  | 0.947 | chr22:44347251 | 22:44347251-G-A | 0.2389 | 0.1559 | 4.94E-02 | 1.699 | 0.196719672 |
| rs2008451  | rs34912062 | 5477  | 0.947 | chr22:44348446 | 22:44348446-G-T | 0.2389 | 0.1559 | 4.94E-02 | 1.699 | 0.196719672 |
| rs13055874 | rs2092501  | 5579  | 0.947 | chr22:44347251 | 22:44347251-G-A | 0.2389 | 0.1559 | 4.94E-02 | 1.699 | 0.196719672 |
| rs13055900 | rs2092501  | 5585  | 0.947 | chr22:44347251 | 22:44347251-G-A | 0.2389 | 0.1559 | 4.94E-02 | 1.699 | 0.196719672 |
| rs4823181  | rs2092501  | 5645  | 0.947 | chr22:44347251 | 22:44347251-G-A | 0.2389 | 0.1559 | 4.94E-02 | 1.699 | 0.196719672 |
| rs4823180  | rs2092501  | 5953  | 0.947 | chr22:44347251 | 22:44347251-G-A | 0.2389 | 0.1559 | 4.94E-02 | 1.699 | 0.196719672 |
| rs4823179  | rs2092501  | 6058  | 0.947 | chr22:44347251 | 22:44347251-G-A | 0.2389 | 0.1559 | 4.94E-02 | 1.699 | 0.196719672 |
| rs13055874 | rs34912062 | 6774  | 0.947 | chr22:44348446 | 22:44348446-G-T | 0.2389 | 0.1559 | 4.94E-02 | 1.699 | 0.196719672 |
| rs13055900 | rs34912062 | 6780  | 0.947 | chr22:44348446 | 22:44348446-G-T | 0.2389 | 0.1559 | 4.94E-02 | 1.699 | 0.196719672 |
| rs4823181  | rs34912062 | 6840  | 0.947 | chr22:44348446 | 22:44348446-G-T | 0.2389 | 0.1559 | 4.94E-02 | 1.699 | 0.196719672 |
| rs4823180  | rs34912062 | 7148  | 0.947 | chr22:44348446 | 22:44348446-G-T | 0.2389 | 0.1559 | 4.94E-02 | 1.699 | 0.196719672 |
| rs36069781 | rs2092501  | 7165  | 0.947 | chr22:44347251 | 22:44347251-G-A | 0.2389 | 0.1559 | 4.94E-02 | 1.699 | 0.196719672 |
| rs4823179  | rs34912062 | 7253  | 0.947 | chr22:44348446 | 22:44348446-G-T | 0.2389 | 0.1559 | 4.94E-02 | 1.699 | 0.196719672 |
| rs13055555 | rs2092501  | 7725  | 0.947 | chr22:44347251 | 22:44347251-G-A | 0.2389 | 0.1559 | 4.94E-02 | 1.699 | 0.196719672 |
| rs56373884 | rs34912062 | 8022  | 0.945 | chr22:44348446 | 22:44348446-G-T | 0.2389 | 0.1559 | 4.94E-02 | 1.699 | 0.196719672 |
| rs36069781 | rs34912062 | 8360  | 0.947 | chr22:44348446 | 22:44348446-G-T | 0.2389 | 0.1559 | 4.94E-02 | 1.699 | 0.196719672 |
| rs13055555 | rs34912062 | 8920  | 0.947 | chr22:44348446 | 22:44348446-G-T | 0.2389 | 0.1559 | 4.94E-02 | 1.699 | 0.196719672 |
| rs56373884 | rs2092501  | 9217  | 0.945 | chr22:44347251 | 22:44347251-G-A | 0.2389 | 0.1559 | 4.94E-02 | 1.699 | 0.196719672 |
| rs926633   | rs2092501  | 9718  |       |                |                 |        |        |          |       |             |

|            |            |       |       |                |                 |        |        |          |       |             |
|------------|------------|-------|-------|----------------|-----------------|--------|--------|----------|-------|-------------|
| rs2294921  | rs34912062 | 13396 | 0.945 | chr22:44348446 | 22:44348446-G-T | 0.2389 | 0.1559 | 4.94E-02 | 1.699 | 0.196719672 |
| rs2896010  | rs2092501  | 13557 | 0.947 | chr22:44347251 | 22:44347251-G-A | 0.2389 | 0.1559 | 4.94E-02 | 1.699 | 0.196719672 |
| rs2072905  | rs2092501  | 13772 | 0.947 | chr22:44347251 | 22:44347251-G-A | 0.2389 | 0.1559 | 4.94E-02 | 1.699 | 0.196719672 |
| rs2076207  | rs2092501  | 13881 | 0.947 | chr22:44347251 | 22:44347251-G-A | 0.2389 | 0.1559 | 4.94E-02 | 1.699 | 0.196719672 |
| rs4823178  | rs34912062 | 13917 | 0.891 | chr22:44348446 | 22:44348446-G-T | 0.2389 | 0.1559 | 4.94E-02 | 1.699 | 0.196719672 |
| rs4823177  | rs34912062 | 13960 | 0.891 | chr22:44348446 | 22:44348446-G-T | 0.2389 | 0.1559 | 4.94E-02 | 1.699 | 0.196719672 |
| rs4823176  | rs34912062 | 13970 | 0.891 | chr22:44348446 | 22:44348446-G-T | 0.2389 | 0.1559 | 4.94E-02 | 1.699 | 0.196719672 |
| rs2072906  | rs2092501  | 14079 | 0.947 | chr22:44347251 | 22:44347251-G-A | 0.2389 | 0.1559 | 4.94E-02 | 1.699 | 0.196719672 |
| rs34879941 | rs2092501  | 14373 | 0.947 | chr22:44347251 | 22:44347251-G-A | 0.2389 | 0.1559 | 4.94E-02 | 1.699 | 0.196719672 |
| rs2896020  | rs34912062 | 14478 | 0.947 | chr22:44348446 | 22:44348446-G-T | 0.2389 | 0.1559 | 4.94E-02 | 1.699 | 0.196719672 |
| rs2401512  | rs34912062 | 14501 | 0.947 | chr22:44348446 | 22:44348446-G-T | 0.2389 | 0.1559 | 4.94E-02 | 1.699 | 0.196719672 |
| rs2294921  | rs2092501  | 14591 | 0.945 | chr22:44347251 | 22:44347251-G-A | 0.2389 | 0.1559 | 4.94E-02 | 1.699 | 0.196719672 |
| rs2072907  | rs2092501  | 14598 | 0.947 | chr22:44347251 | 22:44347251-G-A | 0.2389 | 0.1559 | 4.94E-02 | 1.699 | 0.196719672 |
| rs2281135  | rs2092501  | 14681 | 0.947 | chr22:44347251 | 22:44347251-G-A | 0.2389 | 0.1559 | 4.94E-02 | 1.699 | 0.196719672 |
| rs2896019  | rs34912062 | 14752 | 0.947 | chr22:44348446 | 22:44348446-G-T | 0.2389 | 0.1559 | 4.94E-02 | 1.699 | 0.196719672 |
| rs2281137  | rs2092501  | 14758 | 0.836 | chr22:44347251 | 22:44347251-G-A | 0.2389 | 0.1559 | 4.94E-02 | 1.699 | 0.196719672 |
| rs2281138  | rs2092501  | 14774 | 0.947 | chr22:44347251 | 22:44347251-G-A | 0.2389 | 0.1559 | 4.94E-02 | 1.699 | 0.196719672 |
| rs2072905  | rs34912062 | 14967 | 0.947 | chr22:44348446 | 22:44348446-G-T | 0.2389 | 0.1559 | 4.94E-02 | 1.699 | 0.196719672 |
| rs2076207  | rs34912062 | 15076 | 0.947 | chr22:44348446 | 22:44348446-G-T | 0.2389 | 0.1559 | 4.94E-02 | 1.699 | 0.196719672 |
| rs2072906  | rs34912062 | 15274 | 0.947 | chr22:44348446 | 22:44348446-G-T | 0.2389 | 0.1559 | 4.94E-02 | 1.699 | 0.196719672 |
| rs1883349  | rs2092501  | 15308 | 0.947 | chr22:44347251 | 22:44347251-G-A | 0.2389 | 0.1559 | 4.94E-02 | 1.699 | 0.196719672 |
| rs1883348  | rs2092501  | 15436 | 0.947 | chr22:44347251 | 22:44347251-G-A | 0.2389 | 0.1559 | 4.94E-02 | 1.699 | 0.196719672 |
| rs13056638 | rs2092501  | 15473 | 0.947 | chr22:44347251 | 22:44347251-G-A | 0.2389 | 0.1559 | 4.94E-02 | 1.699 | 0.196719672 |
| rs34879941 | rs34912062 | 15568 | 0.947 | chr22:44348446 | 22:44348446-G-T | 0.2389 | 0.1559 | 4.94E-02 | 1.699 | 0.196719672 |
| rs1997693  | rs2092501  | 15738 | 0.947 | chr22:44347251 | 22:44347251-G-A | 0.2389 | 0.1559 | 4.94E-02 | 1.699 | 0.196719672 |
| rs2072907  | rs34912062 | 15793 | 0.947 | chr22:44348446 | 22:44348446-G-T | 0.2389 | 0.1559 | 4.94E-02 | 1.699 | 0.196719672 |
| rs2281135  | rs34912062 | 15876 | 0.947 | chr22:44348446 | 22:44348446-G-T | 0.2389 | 0.1559 | 4.94E-02 | 1.699 | 0.196719672 |
| rs2281137  | rs34912062 | 15953 | 0.836 | chr22:44348446 | 22:44348446-G-T | 0.2389 | 0.1559 | 4.94E-02 | 1.699 | 0.196719672 |
| rs2281138  | rs34912062 | 15969 | 0.947 | chr22:44348446 | 22:44348446-G-T | 0.2389 | 0.1559 | 4.94E-02 | 1.699 | 0.196719672 |
| rs1883349  | rs34912062 | 16503 | 0.947 | chr22:44348446 | 22:44348446-G-T | 0.2389 | 0.1559 | 4.94E-02 | 1.699 | 0.196719672 |
| rs1883348  | rs34912062 | 16631 | 0.947 | chr22:44348446 | 22:44348446-G-T | 0.2389 | 0.1559 | 4.94E-02 | 1.699 | 0.196719672 |
| rs13056638 | rs34912062 | 16668 | 0.947 | chr22:44348446 | 22:44348446-G-T | 0.2389 | 0.1559 | 4.94E-02 | 1.699 | 0.196719672 |
| rs1997693  | rs34912062 | 16933 | 0.947 | chr22:44348446 | 22:44348446-G-T | 0.2389 | 0.1559 | 4.94E-02 | 1.699 | 0.196719672 |
| rs3761472  | rs34912062 | 19676 | 0.945 | chr22:44348446 | 22:44348446-G-T | 0.2389 | 0.1559 | 4.94E-02 | 1.699 | 0.196719672 |
| rs3761472  | rs2092501  | 20871 | 0.945 | chr22:44347251 | 22:44347251-G-A | 0.2389 | 0.1559 | 4.94E-02 | 1.699 | 0.196719672 |
| rs61473277 | rs34912062 | 22960 | 0.838 | chr22:44348446 | 22:44348446-G-T | 0.2389 | 0.1559 | 4.94E-02 | 1.699 | 0.196719672 |
| rs61473277 | rs2092501  | 24155 | 0.838 | chr22:44347251 | 22:44347251-G-A | 0.2389 | 0.1559 | 4.94E-02 | 1.699 | 0.196719672 |
| rs2235776  | rs34912062 | 29553 | 0.838 | chr22:44348446 | 22:44348446-G-T | 0.2389 | 0.1559 | 4.94E-02 | 1.699 | 0.196719672 |
| rs2235777  | rs34912062 | 30363 | 0.838 | chr22:44348446 | 22:44348446-G-T | 0.2389 | 0.1559 | 4.94E-02 | 1.699 | 0.196719672 |
| rs2235776  | rs2092501  | 30748 | 0.838 | chr22:44347251 | 22:44347251-G-A | 0.2389 | 0.1559 | 4.94E-02 | 1.699 | 0.196719672 |
| rs2294923  | rs34912062 | 31294 | 0.838 | chr22:44348446 | 22:44348446-G-T | 0.2389 | 0.1559 | 4.94E-02 | 1.699 | 0.196719672 |
| rs2235777  | rs2092501  | 31558 | 0.838 | chr22:44347251 | 22:44347251-G-A | 0.2389 | 0.1559 | 4.94E-02 | 1.699 | 0.196719672 |
| rs9626079  | rs34912062 | 31563 | 0.838 | chr22:44348446 | 22:44348446-G-T | 0.2389 | 0.1559 | 4.94E-02 | 1.699 | 0.196719672 |
| rs2294923  | rs2092501  | 32489 | 0.838 | chr22:44347251 | 22:44347251-G-A | 0.2389 | 0.1559 | 4.94E-02 | 1.699 | 0.196719672 |
| rs9626079  | rs2092501  | 32758 | 0.838 | chr22:44347251 | 22:44347251-G-A | 0.2389 | 0.1559 | 4.94E-02 | 1.699 | 0.196719672 |
| rs4823108  | rs34912062 | 32894 | 0.838 | chr22:44348446 | 22:44348446-G-T | 0.2389 | 0.1559 | 4.94E-02 | 1.699 | 0.196719672 |
| rs4823109  | rs34912062 | 33036 | 0.838 | chr22:44348446 | 22:44348446-G-T | 0.2389 | 0.1559 | 4.94E-02 | 1.699 | 0.196719672 |
| rs4823108  | rs2092501  | 34089 | 0.838 | chr22:44347251 | 22:44347251-G-A | 0.2389 | 0.1559 | 4.94E-02 | 1.699 | 0.196719672 |
| rs4823109  | rs2092501  | 34231 | 0.838 | chr22:44347251 | 22:44347251-G-A | 0.2389 | 0.1559 | 4.94E-02 | 1.699 | 0.196719672 |
| rs3761472  | rs3761472  | 0     | 1     | chr22:44368122 | exm1615990      | 0.2444 | 0.1613 | 5.16E-02 | 1.682 | 0.202168852 |
| rs61473277 | rs3761472  | 3284  | 0.887 | chr22:44368122 | exm1615990      | 0.2444 | 0.1613 | 5.16E-02 | 1.682 | 0.202168852 |
| rs2294921  | rs3761472  | 6280  | 1     | chr22:44368122 | exm1615990      | 0.2444 | 0.1613 | 5.16E-02 | 1.682 | 0.202168852 |
| rs2235776  | rs3761472  | 9877  | 0.887 | chr22:44368122 | exm1615990      | 0.2444 | 0.1613 | 5.16E-02 | 1.682 | 0.202168852 |
| rs2235777  | rs3761472  | 10687 | 0.887 | chr22:44368122 | exm1615990      | 0.2444 | 0.1613 | 5.16E-02 | 1.682 | 0.202168852 |
| rs2294923  | rs3761472  | 11618 | 0.887 | chr22:44368122 | exm1615990      | 0.2444 | 0.1613 | 5.16E-02 | 1.682 | 0.202168852 |
| rs56373884 | rs3761472  | 11654 | 1     | chr22:44368122 | exm1615990      | 0.2444 | 0.1613 | 5.16E-02 | 1.682 | 0.202168852 |
| rs9626079  | rs3761472  | 11887 | 0.887 | chr22:44368122 | exm1615990      | 0.2444 | 0.1613 | 5.16E-02 | 1.682 | 0.202168852 |
| rs4823108  | rs3761472  | 13218 | 0.887 | chr22:44368122 | exm1615990      | 0.2444 | 0.1613 | 5.16E-02 | 1.682 | 0.202168852 |
| rs4823109  | rs3761472  | 13360 | 0.887 | chr22:44368122 | exm1615990      | 0.2444 | 0.1613 | 5.16E-02 | 1.682 | 0.202168852 |
| rs1474745  | rs3761472  | 18886 | 0.945 | chr22:44368122 | exm1615990      | 0.2444 | 0.1613 | 5.16E-02 | 1.682 | 0.202168852 |
| rs34912062 | rs3761472  | 19676 | 0.945 | chr22:44368122 | exm1615990      | 0.2444 | 0.1613 | 5.16E-02 | 1.682 | 0.202168852 |
| rs2092501  | rs3761472  | 20871 | 0.945 | chr22:44368122 | exm1615990      | 0.2444 | 0.1613 | 5.16E-02 | 1.682 | 0.202168852 |
| rs2008451  | rs3761472  | 25153 | 0.895 | chr22:44368122 | exm1615990      | 0.2444 | 0.1613 | 5.16E-02 | 1.682 | 0.202168852 |
| rs13055874 | rs3761472  | 26450 | 0.895 | chr22:44368122 | exm1615990      | 0.2444 | 0.1613 | 5.16E-02 | 1.682 | 0.202168852 |
| rs13055900 | rs3761472  | 26456 | 0.895 | chr22:44368122 | exm1615990      | 0.2444 | 0.1613 | 5.16E-02 | 1.682 | 0.202168852 |
| rs4823181  | rs3761472  | 26516 | 0.895 | chr22:44368122 | exm1615990      | 0.2444 | 0.1613 | 5.16E-02 | 1.682 | 0.202168852 |
| rs4823180  | rs3761472  | 26824 | 0.895 | chr22:44368122 | exm1615990      | 0.2444 | 0.1613 | 5.16E-02 | 1.682 | 0.202168852 |
| rs4823179  | rs3761472  | 26929 | 0.895 | chr22:44368122 | exm1615990      | 0.2444 | 0.1613 | 5.16E-02 | 1.682 | 0.202168852 |
| rs2294916  | rs3761472  | 27200 | 0.83  | chr22:44368122 | exm1615990      | 0.2444 | 0.1613 | 5.16E-02 | 1.682 | 0.202168852 |
| rs36069781 | rs3761472  | 28036 | 0.895 | chr22:44368122 | exm1615990      | 0.2444 | 0.1613 | 5.16E-02 | 1.682 | 0.202168852 |
| rs13055555 | rs3761472  | 28596 | 0.895 | chr22:44368122 | exm1615990      | 0.2444 | 0.1613 | 5.16E-02 | 1.682 | 0.202168852 |
| rs926633   | rs3761472  | 30589 | 0.895 | chr22:44368122 | exm1615990      | 0.2444 | 0.1613 | 5.16E-02 | 1.682 | 0.202168852 |
| rs73176497 | rs3761472  | 31165 | 0.895 | chr22:44368122 | exm1615990      | 0.2444 | 0.1613 | 5.16E-02 | 1.682 | 0.202168852 |
| rs1010022  | rs3761472  | 31812 | 0.895 | chr22:44368122 | exm1615990      | 0.2444 | 0.1613 | 5.16E-02 | 1.682 | 0.202168852 |
| rs1010023  | rs3761472  | 32024 | 0.895 | chr22:44368122 | exm1615990      | 0.2444 | 0.1613 | 5.16E-02 | 1.682 | 0.202168852 |
| rs2073081  | rs3761472  | 32378 | 0.895 | chr22:44368122 | exm1615990      | 0.2444 | 0.1613 | 5.16E-02 | 1.682 | 0.202168852 |
| rs34352134 | rs3761472  | 32706 | 0.895 | chr22:44368122 | exm1615990      | 0.2444 | 0.1613 | 5.16E-02 | 1.682 | 0.202168852 |
| rs35621602 | rs3761472  | 32716 | 0.895 | chr22:44368122 | exm1615990      | 0.2444 | 0.1613 | 5.16E-02 | 1.682 | 0.202168852 |
| rs16991175 | rs3761472  | 32791 | 0.836 | chr22:44368122 | exm1615990      | 0.2444 | 0.1613 | 5.16E-02 | 1.682 | 0.202168852 |
| rs4823178  | rs3761472  | 33593 | 0.836 | chr22:44368122 | exm1615990      | 0.2444 | 0.1613 | 5.16E-02 | 1.682 | 0.202168852 |
| rs4823177  | rs3761472  | 33636 | 0.836 | chr22:44368122 | exm1615990      | 0.2444 | 0.1613 | 5.16E-02 | 1.682 | 0.202168852 |
| rs4823176  | rs3761472  | 33646 | 0.836 | chr22:44368122 | exm1615990      | 0.2444 | 0.1613 | 5.16E-02 | 1.682 | 0.202168852 |
| rs2896020  | rs3761472  | 34154 | 0.895 | chr22:44368122 | exm1615990      | 0.2444 | 0.1613 | 5.16E-02 | 1.682 | 0.202168852 |
| rs2401512  | rs3761472  | 34177 | 0.895 | chr22:44368122 | exm1615990      | 0.2444 | 0.1613 | 5.16E-02 | 1.682 | 0.202168852 |
| rs2896019  | rs3761472  | 34428 | 0.895 | chr22:44368122 | exm1615990      | 0.2444 | 0.1613 | 5.16E-02 | 1.682 | 0.202168852 |
| rs2072905  | rs3761472  | 34643 | 0.895 | chr22:44368122 |                 |        |        |          |       |             |

|            |           |       |       |                |                 |        |        |          |       |             |
|------------|-----------|-------|-------|----------------|-----------------|--------|--------|----------|-------|-------------|
| rs1007863  | rs6006473 | 2376  | 1     | chr22:44393075 | 22:44393075-C-T | 0.4833 | 0.3817 | 5.75E-02 | 1.515 | 0.431667213 |
| rs2235778  | rs6006473 | 3561  | 0.902 | chr22:44393075 | 22:44393075-C-T | 0.4833 | 0.3817 | 5.75E-02 | 1.515 | 0.431667213 |
| rs3788604  | rs6006473 | 4658  | 1     | chr22:44393075 | 22:44393075-C-T | 0.4833 | 0.3817 | 5.75E-02 | 1.515 | 0.431667213 |
| rs6006469  | rs6006473 | 9458  | 1     | chr22:44393075 | 22:44393075-C-T | 0.4833 | 0.3817 | 5.75E-02 | 1.515 | 0.431667213 |
| rs6006468  | rs6006473 | 9643  | 1     | chr22:44393075 | 22:44393075-C-T | 0.4833 | 0.3817 | 5.75E-02 | 1.515 | 0.431667213 |
| rs6006602  | rs6006473 | 9675  | 1     | chr22:44393075 | 22:44393075-C-T | 0.4833 | 0.3817 | 5.75E-02 | 1.515 | 0.431667213 |
| rs4823182  | rs6006473 | 15633 | 0.872 | chr22:44393075 | 22:44393075-C-T | 0.4833 | 0.3817 | 5.75E-02 | 1.515 | 0.431667213 |
| rs67450864 | rs6006473 | 16740 | 0.872 | chr22:44393075 | 22:44393075-C-T | 0.4833 | 0.3817 | 5.75E-02 | 1.515 | 0.431667213 |
| rs1474745  | rs1474745 | 0     | 1     | chr22:44349236 | 22:44349236-T-C | 0.2389 | 0.1613 | 6.81E-02 | 1.632 | 0.199463934 |
| rs34912062 | rs1474745 | 790   | 1     | chr22:44349236 | 22:44349236-T-C | 0.2389 | 0.1613 | 6.81E-02 | 1.632 | 0.199463934 |
| rs2092501  | rs1474745 | 1985  | 1     | chr22:44349236 | 22:44349236-T-C | 0.2389 | 0.1613 | 6.81E-02 | 1.632 | 0.199463934 |
| rs2008451  | rs1474745 | 6267  | 0.947 | chr22:44349236 | 22:44349236-T-C | 0.2389 | 0.1613 | 6.81E-02 | 1.632 | 0.199463934 |
| rs56373884 | rs1474745 | 7232  | 0.945 | chr22:44349236 | 22:44349236-T-C | 0.2389 | 0.1613 | 6.81E-02 | 1.632 | 0.199463934 |
| rs13055874 | rs1474745 | 7564  | 0.947 | chr22:44349236 | 22:44349236-T-C | 0.2389 | 0.1613 | 6.81E-02 | 1.632 | 0.199463934 |
| rs13055900 | rs1474745 | 7570  | 0.947 | chr22:44349236 | 22:44349236-T-C | 0.2389 | 0.1613 | 6.81E-02 | 1.632 | 0.199463934 |
| rs4823181  | rs1474745 | 7630  | 0.947 | chr22:44349236 | 22:44349236-T-C | 0.2389 | 0.1613 | 6.81E-02 | 1.632 | 0.199463934 |
| rs4823180  | rs1474745 | 7938  | 0.947 | chr22:44349236 | 22:44349236-T-C | 0.2389 | 0.1613 | 6.81E-02 | 1.632 | 0.199463934 |
| rs4823179  | rs1474745 | 8043  | 0.947 | chr22:44349236 | 22:44349236-T-C | 0.2389 | 0.1613 | 6.81E-02 | 1.632 | 0.199463934 |
| rs36069781 | rs1474745 | 9150  | 0.947 | chr22:44349236 | 22:44349236-T-C | 0.2389 | 0.1613 | 6.81E-02 | 1.632 | 0.199463934 |
| rs13056555 | rs1474745 | 9710  | 0.947 | chr22:44349236 | 22:44349236-T-C | 0.2389 | 0.1613 | 6.81E-02 | 1.632 | 0.199463934 |
| rs926633   | rs1474745 | 11703 | 0.947 | chr22:44349236 | 22:44349236-T-C | 0.2389 | 0.1613 | 6.81E-02 | 1.632 | 0.199463934 |
| rs73176497 | rs1474745 | 12279 | 0.947 | chr22:44349236 | 22:44349236-T-C | 0.2389 | 0.1613 | 6.81E-02 | 1.632 | 0.199463934 |
| rs292491   | rs1474745 | 12606 | 0.945 | chr22:44349236 | 22:44349236-T-C | 0.2389 | 0.1613 | 6.81E-02 | 1.632 | 0.199463934 |
| rs1010022  | rs1474745 | 12926 | 0.947 | chr22:44349236 | 22:44349236-T-C | 0.2389 | 0.1613 | 6.81E-02 | 1.632 | 0.199463934 |
| rs1010023  | rs1474745 | 13138 | 0.947 | chr22:44349236 | 22:44349236-T-C | 0.2389 | 0.1613 | 6.81E-02 | 1.632 | 0.199463934 |
| rs2073081  | rs1474745 | 13492 | 0.947 | chr22:44349236 | 22:44349236-T-C | 0.2389 | 0.1613 | 6.81E-02 | 1.632 | 0.199463934 |
| rs34352134 | rs1474745 | 13820 | 0.947 | chr22:44349236 | 22:44349236-T-C | 0.2389 | 0.1613 | 6.81E-02 | 1.632 | 0.199463934 |
| rs35621602 | rs1474745 | 13830 | 0.947 | chr22:44349236 | 22:44349236-T-C | 0.2389 | 0.1613 | 6.81E-02 | 1.632 | 0.199463934 |
| rs16991175 | rs1474745 | 13905 | 0.891 | chr22:44349236 | 22:44349236-T-C | 0.2389 | 0.1613 | 6.81E-02 | 1.632 | 0.199463934 |
| rs4823178  | rs1474745 | 14707 | 0.891 | chr22:44349236 | 22:44349236-T-C | 0.2389 | 0.1613 | 6.81E-02 | 1.632 | 0.199463934 |
| rs4823177  | rs1474745 | 14750 | 0.891 | chr22:44349236 | 22:44349236-T-C | 0.2389 | 0.1613 | 6.81E-02 | 1.632 | 0.199463934 |
| rs4823176  | rs1474745 | 14760 | 0.891 | chr22:44349236 | 22:44349236-T-C | 0.2389 | 0.1613 | 6.81E-02 | 1.632 | 0.199463934 |
| rs2896020  | rs1474745 | 15268 | 0.947 | chr22:44349236 | 22:44349236-T-C | 0.2389 | 0.1613 | 6.81E-02 | 1.632 | 0.199463934 |
| rs2401512  | rs1474745 | 15291 | 0.947 | chr22:44349236 | 22:44349236-T-C | 0.2389 | 0.1613 | 6.81E-02 | 1.632 | 0.199463934 |
| rs2896019  | rs1474745 | 15542 | 0.947 | chr22:44349236 | 22:44349236-T-C | 0.2389 | 0.1613 | 6.81E-02 | 1.632 | 0.199463934 |
| rs2072905  | rs1474745 | 15757 | 0.947 | chr22:44349236 | 22:44349236-T-C | 0.2389 | 0.1613 | 6.81E-02 | 1.632 | 0.199463934 |
| rs2076207  | rs1474745 | 15866 | 0.947 | chr22:44349236 | 22:44349236-T-C | 0.2389 | 0.1613 | 6.81E-02 | 1.632 | 0.199463934 |
| rs2072906  | rs1474745 | 16064 | 0.947 | chr22:44349236 | 22:44349236-T-C | 0.2389 | 0.1613 | 6.81E-02 | 1.632 | 0.199463934 |
| rs34879941 | rs1474745 | 16358 | 0.947 | chr22:44349236 | 22:44349236-T-C | 0.2389 | 0.1613 | 6.81E-02 | 1.632 | 0.199463934 |
| rs2072907  | rs1474745 | 16583 | 0.947 | chr22:44349236 | 22:44349236-T-C | 0.2389 | 0.1613 | 6.81E-02 | 1.632 | 0.199463934 |
| rs2281135  | rs1474745 | 16666 | 0.947 | chr22:44349236 | 22:44349236-T-C | 0.2389 | 0.1613 | 6.81E-02 | 1.632 | 0.199463934 |
| rs2281137  | rs1474745 | 16743 | 0.836 | chr22:44349236 | 22:44349236-T-C | 0.2389 | 0.1613 | 6.81E-02 | 1.632 | 0.199463934 |
| rs2281138  | rs1474745 | 16759 | 0.947 | chr22:44349236 | 22:44349236-T-C | 0.2389 | 0.1613 | 6.81E-02 | 1.632 | 0.199463934 |
| rs1883349  | rs1474745 | 17293 | 0.947 | chr22:44349236 | 22:44349236-T-C | 0.2389 | 0.1613 | 6.81E-02 | 1.632 | 0.199463934 |
| rs1883348  | rs1474745 | 17421 | 0.947 | chr22:44349236 | 22:44349236-T-C | 0.2389 | 0.1613 | 6.81E-02 | 1.632 | 0.199463934 |
| rs13056638 | rs1474745 | 17458 | 0.947 | chr22:44349236 | 22:44349236-T-C | 0.2389 | 0.1613 | 6.81E-02 | 1.632 | 0.199463934 |
| rs1997693  | rs1474745 | 17723 | 0.947 | chr22:44349236 | 22:44349236-T-C | 0.2389 | 0.1613 | 6.81E-02 | 1.632 | 0.199463934 |
| rs3761472  | rs1474745 | 18886 | 0.945 | chr22:44349236 | 22:44349236-T-C | 0.2389 | 0.1613 | 6.81E-02 | 1.632 | 0.199463934 |
| rs61473277 | rs1474745 | 22170 | 0.838 | chr22:44349236 | 22:44349236-T-C | 0.2389 | 0.1613 | 6.81E-02 | 1.632 | 0.199463934 |
| rs2235776  | rs1474745 | 28763 | 0.838 | chr22:44349236 | 22:44349236-T-C | 0.2389 | 0.1613 | 6.81E-02 | 1.632 | 0.199463934 |
| rs2235777  | rs1474745 | 29573 | 0.838 | chr22:44349236 | 22:44349236-T-C | 0.2389 | 0.1613 | 6.81E-02 | 1.632 | 0.199463934 |
| rs2294923  | rs1474745 | 30504 | 0.838 | chr22:44349236 | 22:44349236-T-C | 0.2389 | 0.1613 | 6.81E-02 | 1.632 | 0.199463934 |
| rs9626079  | rs1474745 | 30773 | 0.838 | chr22:44349236 | 22:44349236-T-C | 0.2389 | 0.1613 | 6.81E-02 | 1.632 | 0.199463934 |
| rs4823108  | rs1474745 | 32104 | 0.838 | chr22:44349236 | 22:44349236-T-C | 0.2389 | 0.1613 | 6.81E-02 | 1.632 | 0.199463934 |
| rs4823109  | rs1474745 | 32246 | 0.838 | chr22:44349236 | 22:44349236-T-C | 0.2389 | 0.1613 | 6.81E-02 | 1.632 | 0.199463934 |
| rs4823180  | rs4823180 | 0     | 1     | chr22:44341298 | 22:44341298-G-A | 0.2611 | 0.1828 | 7.86E-02 | 1.58  | 0.221308197 |
| rs4823179  | rs4823180 | 105   | 1     | chr22:44341298 | 22:44341298-G-A | 0.2611 | 0.1828 | 7.86E-02 | 1.58  | 0.221308197 |
| rs4823181  | rs4823180 | 308   | 1     | chr22:44341298 | 22:44341298-G-A | 0.2611 | 0.1828 | 7.86E-02 | 1.58  | 0.221308197 |
| rs13055900 | rs4823180 | 368   | 1     | chr22:44341298 | 22:44341298-G-A | 0.2611 | 0.1828 | 7.86E-02 | 1.58  | 0.221308197 |
| rs13055874 | rs4823180 | 374   | 1     | chr22:44341298 | 22:44341298-G-A | 0.2611 | 0.1828 | 7.86E-02 | 1.58  | 0.221308197 |
| rs2294916  | rs4823180 | 376   | 0.843 | chr22:44341298 | 22:44341298-G-A | 0.2611 | 0.1828 | 7.86E-02 | 1.58  | 0.221308197 |
| rs36069781 | rs4823180 | 1212  | 1     | chr22:44341298 | 22:44341298-G-A | 0.2611 | 0.1828 | 7.86E-02 | 1.58  | 0.221308197 |
| rs2008451  | rs4823180 | 1671  | 1     | chr22:44341298 | 22:44341298-G-A | 0.2611 | 0.1828 | 7.86E-02 | 1.58  | 0.221308197 |
| rs13056555 | rs4823180 | 1772  | 1     | chr22:44341298 | 22:44341298-G-A | 0.2611 | 0.1828 | 7.86E-02 | 1.58  | 0.221308197 |
| rs926633   | rs4823180 | 3765  | 1     | chr22:44341298 | 22:44341298-G-A | 0.2611 | 0.1828 | 7.86E-02 | 1.58  | 0.221308197 |
| rs73176497 | rs4823180 | 4341  | 1     | chr22:44341298 | 22:44341298-G-A | 0.2611 | 0.1828 | 7.86E-02 | 1.58  | 0.221308197 |
| rs1010022  | rs4823180 | 4988  | 1     | chr22:44341298 | 22:44341298-G-A | 0.2611 | 0.1828 | 7.86E-02 | 1.58  | 0.221308197 |
| rs1010023  | rs4823180 | 5200  | 1     | chr22:44341298 | 22:44341298-G-A | 0.2611 | 0.1828 | 7.86E-02 | 1.58  | 0.221308197 |
| rs2073081  | rs4823180 | 5554  | 1     | chr22:44341298 | 22:44341298-G-A | 0.2611 | 0.1828 | 7.86E-02 | 1.58  | 0.221308197 |
| rs34352134 | rs4823180 | 5882  | 1     | chr22:44341298 | 22:44341298-G-A | 0.2611 | 0.1828 | 7.86E-02 | 1.58  | 0.221308197 |
| rs35621602 | rs4823180 | 5892  | 1     | chr22:44341298 | 22:44341298-G-A | 0.2611 | 0.1828 | 7.86E-02 | 1.58  | 0.221308197 |
| rs2092501  | rs4823180 | 5953  | 0.947 | chr22:44341298 | 22:44341298-G-A | 0.2611 | 0.1828 | 7.86E-02 | 1.58  | 0.221308197 |
| rs16991175 | rs4823180 | 5967  | 0.947 | chr22:44341298 | 22:44341298-G-A | 0.2611 | 0.1828 | 7.86E-02 | 1.58  | 0.221308197 |
| rs4823178  | rs4823180 | 6769  | 0.947 | chr22:44341298 | 22:44341298-G-A | 0.2611 | 0.1828 | 7.86E-02 | 1.58  | 0.221308197 |
| rs4823177  | rs4823180 | 6812  | 0.947 | chr22:44341298 | 22:44341298-G-A | 0.2611 | 0.1828 | 7.86E-02 | 1.58  | 0.221308197 |
| rs4823176  | rs4823180 | 6822  | 0.947 | chr22:44341298 | 22:44341298-G-A | 0.2611 | 0.1828 | 7.86E-02 | 1.58  | 0.221308197 |
| rs34912062 | rs4823180 | 7148  | 0.947 | chr22:44341298 | 22:44341298-G-A | 0.2611 | 0.1828 | 7.86E-02 | 1.58  | 0.221308197 |
| rs2896020  | rs4823180 | 7330  | 1     | chr22:44341298 | 22:44341298-G-A | 0.2611 | 0.1828 | 7.86E-02 | 1.58  | 0.221308197 |
| rs2401512  | rs4823180 | 7353  | 1     | chr22:44341298 | 22:44341298-G-A | 0.2611 | 0.1828 | 7.86E-02 | 1.58  | 0.221308197 |
| rs2896019  | rs4823180 | 7604  | 1     | chr22:44341298 | 22:44341298-G-A | 0.2611 | 0.1828 | 7.86E-02 | 1.58  | 0.221308197 |
| rs2072905  | rs4823180 | 7819  | 1     | chr22:44341298 | 22:44341298-G-A | 0.2611 | 0.1828 | 7.86E-02 | 1.58  | 0.221308197 |
| rs2076207  | rs4823180 | 7928  | 1     | chr22:44341298 | 22:44341298-G-A | 0.2611 | 0.1828 | 7.86E-02 | 1.58  | 0.221308197 |
| rs1474745  | rs4823180 | 7938  | 0.947 | chr22:44341298 | 22:44341298-G-A | 0.2611 | 0.1828 | 7.86E-02 | 1.58  | 0.221308197 |
| rs2072906  | rs4823180 | 8126  | 1     | chr22:44341298 | 22:44341298-G-A | 0.2611 | 0.1828 | 7.86E-02 | 1.58  | 0.221308197 |
| rs34879941 | rs4823180 | 8420  | 1     | chr22:44341298 | 22:44341298-G-A | 0.2611 | 0.1828 | 7.86E-02 | 1.58  | 0.221308197 |
| rs2072907  | rs4823180 | 8645  | 1     |                |                 |        |        |          |       |             |

|            |            |        |       |                |                  |         |         |          |       |              |
|------------|------------|--------|-------|----------------|------------------|---------|---------|----------|-------|--------------|
| rs2143571  | rs2281298  | 452    | 1     | chr22:44391234 | 22:44391234-G-A  | 0.25    | 0.1828  | 1.29E-01 | 1.49  | 0.21584918   |
| rs2281298  | rs2143571  | 452    | 1     | chr22:44391686 | a_rs2143571      | 0.25    | 0.1828  | 1.29E-01 | 1.49  | 0.21584918   |
| rs2401514  | rs2143571  | 2333   | 1     | chr22:44391686 | a_rs2143571      | 0.25    | 0.1828  | 1.29E-01 | 1.49  | 0.21584918   |
| rs3827385  | rs2281298  | 2417   | 1     | chr22:44391234 | 22:44391234-G-A  | 0.25    | 0.1828  | 1.29E-01 | 1.49  | 0.21584918   |
| rs2073080  | rs2143571  | 2716   | 1     | chr22:44391686 | a_rs2143571      | 0.25    | 0.1828  | 1.29E-01 | 1.49  | 0.21584918   |
| rs2401514  | rs2281298  | 2785   | 1     | chr22:44391234 | 22:44391234-G-A  | 0.25    | 0.1828  | 1.29E-01 | 1.49  | 0.21584918   |
| rs3827385  | rs2143571  | 2869   | 1     | chr22:44391686 | a_rs2143571      | 0.25    | 0.1828  | 1.29E-01 | 1.49  | 0.21584918   |
| rs2073080  | rs2281298  | 3168   | 1     | chr22:44391234 | 22:44391234-G-A  | 0.25    | 0.1828  | 1.29E-01 | 1.49  | 0.21584918   |
| rs2073079  | rs2281298  | 5640   | 1     | chr22:44391234 | 22:44391234-G-A  | 0.25    | 0.1828  | 1.29E-01 | 1.49  | 0.21584918   |
| rs2073079  | rs2143571  | 6092   | 1     | chr22:44391686 | a_rs2143571      | 0.25    | 0.1828  | 1.29E-01 | 1.49  | 0.21584918   |
| rs626283   | rs641738   | 238    | 0.967 | chr19:54676763 | exm1503267       | 0.4833  | 0.4032  | 1.41E-01 | 1.385 | 0.442593443  |
| rs2073079  | rs2073079  | 0      | 1     | chr22:44385594 | 22:44385594-A-G  | 0.25    | 0.1882  | 1.65E-01 | 1.438 | 0.218593443  |
| rs2073080  | rs2073080  | 0      | 1     | chr22:44394402 | 22:44394402-C-T  | 0.25    | 0.1882  | 1.65E-01 | 1.438 | 0.218593443  |
| rs2401514  | rs2401514  | 0      | 1     | chr22:44394019 | 22:44394019-T-A  | 0.25    | 0.1882  | 1.65E-01 | 1.438 | 0.218593443  |
| rs2073080  | rs2401514  | 383    | 1     | chr22:44394019 | 22:44394019-T-A  | 0.25    | 0.1882  | 1.65E-01 | 1.438 | 0.218593443  |
| rs2401514  | rs2073080  | 383    | 1     | chr22:44394402 | 22:44394402-C-T  | 0.25    | 0.1882  | 1.65E-01 | 1.438 | 0.218593443  |
| rs2143571  | rs2401514  | 2333   | 1     | chr22:44394019 | 22:44394019-T-A  | 0.25    | 0.1882  | 1.65E-01 | 1.438 | 0.218593443  |
| rs2143571  | rs2073080  | 2716   | 1     | chr22:44394402 | 22:44394402-C-T  | 0.25    | 0.1882  | 1.65E-01 | 1.438 | 0.218593443  |
| rs2281298  | rs2401514  | 2785   | 1     | chr22:44394019 | 22:44394019-T-A  | 0.25    | 0.1882  | 1.65E-01 | 1.438 | 0.218593443  |
| rs2281298  | rs2073080  | 3168   | 1     | chr22:44394402 | 22:44394402-C-T  | 0.25    | 0.1882  | 1.65E-01 | 1.438 | 0.218593443  |
| rs3827385  | rs2073079  | 3223   | 1     | chr22:44385594 | 22:44385594-A-G  | 0.25    | 0.1882  | 1.65E-01 | 1.438 | 0.218593443  |
| rs3827385  | rs2401514  | 5202   | 1     | chr22:44394019 | 22:44394019-T-A  | 0.25    | 0.1882  | 1.65E-01 | 1.438 | 0.218593443  |
| rs3827385  | rs2073080  | 5585   | 1     | chr22:44394402 | 22:44394402-C-T  | 0.25    | 0.1882  | 1.65E-01 | 1.438 | 0.218593443  |
| rs2281298  | rs2073079  | 5640   | 1     | chr22:44385594 | 22:44385594-A-G  | 0.25    | 0.1882  | 1.65E-01 | 1.438 | 0.218593443  |
| rs2143571  | rs2073079  | 6092   | 1     | chr22:44385594 | 22:44385594-A-G  | 0.25    | 0.1882  | 1.65E-01 | 1.438 | 0.218593443  |
| rs2073079  | rs2401514  | 8425   | 1     | chr22:44394019 | 22:44394019-T-A  | 0.25    | 0.1882  | 1.65E-01 | 1.438 | 0.218593443  |
| rs2401514  | rs2073079  | 8425   | 1     | chr22:44385594 | 22:44385594-A-G  | 0.25    | 0.1882  | 1.65E-01 | 1.438 | 0.218593443  |
| rs2073079  | rs2073080  | 8808   | 1     | chr22:44394402 | 22:44394402-C-T  | 0.25    | 0.1882  | 1.65E-01 | 1.438 | 0.218593443  |
| rs2073080  | rs2073079  | 8808   | 1     | chr22:44385594 | 22:44385594-A-G  | 0.25    | 0.1882  | 1.65E-01 | 1.438 | 0.218593443  |
| rs1883350  | rs1883350  | 0      | 1     | chr22:44328043 | 22:44328043-T-C  | 0.3278  | 0.2849  | 4.27E-01 | 1.224 | 0.305998361  |
| rs10401969 | rs10401969 | 0      | 1     | chr19:1940718  | a_exm-rs10401969 | 0.08333 | 0.06452 | 5.52E-01 | 1.318 | 0.07377082   |
| rs58542926 | rs58542926 | 0      | 1     | chr19:19379549 | exm1447311       | 0.08333 | 0.06452 | 5.52E-01 | 1.318 | 0.07377082   |
| rs10401969 | rs58542926 | 28169  | 0.803 | chr19:19379549 | exm1447311       | 0.08333 | 0.06452 | 5.52E-01 | 1.318 | 0.07377082   |
| rs58542926 | rs10401969 | 28169  | 0.803 | chr19:1940718  | a_exm-rs10401969 | 0.08333 | 0.06452 | 5.52E-01 | 1.318 | 0.07377082   |
| rs10401969 | rs73002956 | 171025 | 1     | chr19:19578743 | 19:19578743-A-G  | 0.08889 | 0.06989 | 5.64E-01 | 1.298 | 0.079234262  |
| rs58542926 | rs73002956 | 199194 | 0.803 | chr19:19578743 | 19:19578743-A-G  | 0.08889 | 0.06989 | 5.64E-01 | 1.298 | 0.079234262  |
| rs10401969 | rs3794991  | 202878 | 1     | chr19:19610596 | 19:19610596-C-T  | 0.08889 | 0.06989 | 5.64E-01 | 1.298 | 0.079234262  |
| rs58542926 | rs3794991  | 231047 | 0.803 | chr19:19610596 | 19:19610596-C-T  | 0.08889 | 0.06989 | 5.64E-01 | 1.298 | 0.079234262  |
| rs10401969 | rs17216525 | 254502 | 0.901 | chr19:19662200 | a_exm-rs17216525 | 0.08889 | 0.06989 | 5.64E-01 | 1.298 | 0.079234262  |
| rs10401969 | rs17216588 | 256359 | 0.901 | chr19:19664077 | 19:19664077-C-T  | 0.08889 | 0.06989 | 5.64E-01 | 1.298 | 0.079234262  |
| rs10401969 | rs73004926 | 263548 | 1     | chr19:19671266 | 19:19671266-C-T  | 0.08889 | 0.06989 | 5.64E-01 | 1.298 | 0.079234262  |
| rs58542926 | rs73004926 | 291717 | 0.803 | chr19:19671266 | 19:19671266-C-T  | 0.08889 | 0.06989 | 5.64E-01 | 1.298 | 0.079234262  |
| rs10401969 | rs16996148 | 250754 | 0.901 | chr19:19688472 | a_exm-rs16996148 | 0.08333 | 0.06989 | 6.96E-01 | 1.21  | 0.076499836  |
| rs10401969 | rs73004966 | 308840 | 0.908 | chr19:19716558 | 19:19716558-C-T  | 0.08989 | 0.07527 | 7.04E-01 | 1.213 | 0.082460164  |
| rs10401969 | rs73004951 | 287510 | 0.808 | chr19:19695228 | 19:19695228-C-T  | 0.08889 | 0.07527 | 7.05E-01 | 1.199 | 0.081968361  |
| rs10401969 | rs73004962 | 305351 | 0.808 | chr19:19713069 | 19:19713069-A-T  | 0.08889 | 0.07527 | 7.05E-01 | 1.199 | 0.081968361  |
| rs10401969 | rs16996185 | 313070 | 0.908 | chr19:19720788 | 19:19720788-T-G  | 0.08889 | 0.07527 | 7.05E-01 | 1.199 | 0.081968361  |
| rs10401969 | rs12610185 | 314004 | 0.908 | chr19:19721722 | 19:19721722-G-A  | 0.08889 | 0.07527 | 7.05E-01 | 1.199 | 0.081968361  |
| rs10401969 | rs10500212 | 315497 | 0.908 | chr19:19723125 | 19:19723125-C-T  | 0.08889 | 0.07527 | 7.05E-01 | 1.199 | 0.081968361  |
| rs58542926 | rs73004951 | 315679 | 0.803 | chr19:19695228 | 19:19695228-C-T  | 0.08889 | 0.07527 | 7.05E-01 | 1.199 | 0.081968361  |
| rs10401969 | rs73004975 | 319434 | 0.908 | chr19:19727152 | 19:19727152-A-G  | 0.08889 | 0.07527 | 7.05E-01 | 1.199 | 0.081968361  |
| rs58542926 | rs73004962 | 333520 | 0.803 | chr19:19713069 | 19:19713069-A-T  | 0.08889 | 0.07527 | 7.05E-01 | 1.199 | 0.081968361  |
| rs10273639 | rs6667     | 3937   | 0.933 | chr7:142460865 | JHU_7.142460864  | 0.4888  | 0.4677  | 7.53E-01 | 1.088 | 0.478077049  |
| rs10273639 | rs10273639 | 0      | 1     | chr7:142456928 | a_rs10273639     | 0.4889  | 0.4731  | 8.34E-01 | 1.065 | 0.480870492  |
| rs10401969 | rs17217098 | 294666 | 0.808 | chr19:19702384 | 19:19702384-G-A  | 0.07778 | 0.06989 | 8.43E-01 | 1.122 | 0.073770328  |
| rs10401969 | rs73004967 | 309338 | 0.808 | chr19:19717056 | 19:19717056-A-G  | 0.07778 | 0.06989 | 8.43E-01 | 1.122 | 0.073770328  |
| rs58542926 | rs17217098 | 322835 | 0.803 | chr19:19702384 | 19:19702384-G-A  | 0.07778 | 0.06989 | 8.43E-01 | 1.122 | 0.073770328  |
| rs58542926 | rs73004967 | 337507 | 0.803 | chr19:19717056 | 19:19717056-A-G  | 0.07778 | 0.06989 | 8.43E-01 | 1.122 | 0.073770328  |
| rs10273639 | rs1811091  | 4620   | 1     | chr7:142461548 | JHU_7.142461547  | 0.4611  | 0.4516  | 9.17E-01 | 1.039 | 0.456272131  |
| rs10273639 | rs1985888  | 5644   | 0.931 | chr7:142462572 | JHU_7.142462571  | 0.4611  | 0.4516  | 9.17E-01 | 1.039 | 0.456272131  |
| rs10273639 | rs1969595  | 11263  | 0.842 | chr7:142468189 | JHU_7.142468188  | 0.4778  | 0.4731  | 1.00E+00 | 1.019 | 0.4754111475 |
| rs1010023  | rs1010023  | 0      | 1     | chr22:44336098 | #N/A             | #N/A    | #N/A    | #N/A     | #N/A  | #N/A         |
| rs12165526 | rs12165526 | 0      | 1     | chr22:44361713 | #N/A             | #N/A    | #N/A    | #N/A     | #N/A  | #N/A         |
| rs12484700 | rs12484700 | 0      | 1     | chr22:44327273 | #N/A             | #N/A    | #N/A    | #N/A     | #N/A  | #N/A         |
| rs1883348  | rs1883348  | 0      | 1     | chr22:44331815 | #N/A             | #N/A    | #N/A    | #N/A     | #N/A  | #N/A         |
| rs1977080  | rs1977080  | 0      | 1     | chr22:44330031 | #N/A             | #N/A    | #N/A    | #N/A     | #N/A  | #N/A         |
| rs1977081  | rs1977081  | 0      | 1     | chr22:44330128 | #N/A             | #N/A    | #N/A    | #N/A     | #N/A  | #N/A         |
| rs2008451  | rs2008451  | 0      | 1     | chr22:44342969 | #N/A             | #N/A    | #N/A    | #N/A     | #N/A  | #N/A         |
| rs2072905  | rs2072905  | 0      | 1     | chr22:44333479 | #N/A             | #N/A    | #N/A    | #N/A     | #N/A  | #N/A         |
| rs2076211  | rs2076211  | 0      | 1     | chr22:44329078 | #N/A             | #N/A    | #N/A    | #N/A     | #N/A  | #N/A         |
| rs2235778  | rs2235778  | 0      | 1     | chr22:44389514 | #N/A             | #N/A    | #N/A    | #N/A     | #N/A  | #N/A         |
| rs2294433  | rs2294433  | 0      | 1     | chr22:44329275 | #N/A             | #N/A    | #N/A    | #N/A     | #N/A  | #N/A         |
| rs2294917  | rs2294917  | 0      | 1     | chr22:44341986 | #N/A             | #N/A    | #N/A    | #N/A     | #N/A  | #N/A         |
| rs2294921  | rs2294921  | 0      | 1     | chr22:44361842 | #N/A             | #N/A    | #N/A    | #N/A     | #N/A  | #N/A         |
| rs2294922  | rs2294922  | 0      | 1     | chr22:44379565 | #N/A             | #N/A    | #N/A    | #N/A     | #N/A  | #N/A         |
| rs34352134 | rs34352134 | 0      | 1     | chr22:44335416 | #N/A             | #N/A    | #N/A    | #N/A     | #N/A  | #N/A         |
| rs34879941 | rs34879941 | 0      | 1     | chr22:44332878 | #N/A             | #N/A    | #N/A    | #N/A     | #N/A  | #N/A         |
| rs3827385  | rs3827385  | 0      | 1     | chr22:44388817 | #N/A             | #N/A    | #N/A    | #N/A     | #N/A  | #N/A         |
| rs4823108  | rs4823108  | 0      | 1     | chr22:44381340 | #N/A             | #N/A    | #N/A    | #N/A     | #N/A  | #N/A         |
| rs4823109  | rs4823109  | 0      | 1     | chr22:44381482 | #N/A             | #N/A    | #N/A    | #N/A     | #N/A  | #N/A         |
| rs4823173  | rs4823173  | 0      | 1     | chr22:44328730 | #N/A             | #N/A    | #N/A    | #N/A     | #N/A  | #N/A         |
| rs4823176  | rs4823176  | 0      | 1     | chr22:44334476 | #N/A             | #N/A    | #N/A    | #N/A     | #N/A  | #N/A         |
| rs4823177  | rs4823177  | 0      | 1     | chr22:44334486 | #N/A             | #N/A    | #N/A    | #N/A     | #N/A  | #N/A         |
| rs4823178  | rs4823178  | 0      | 1     | chr22:44334529 | #N/A             | #N/A    | #N/A    | #N/A     | #N/A  | #N/A         |
| rs4823179  | rs4823179  | 0      | 1     | chr22:44341193 | #N/A             | #N/A    | #N/A    | #N/A     | #N/A  | #N/A         |
| rs56373884 | rs56373884 | 0      | 1     | chr22:44356468 | #N/A             | #N/A    | #N/A    | #N/A     | #N/A  | #N/A         |
| rs6006602  | rs6006602  | 0      | 1     | chr22:44383400 | #N/A             | #N/A    | #N/A    | #N/A     | #N/A  | #N/A         |
| rs626283   | rs626283   | 0      | 1     | chr19:54677001 | #N/A             | #N/A    | #N/A    | #N/A     | #N/A  | #N/A         |
| rs73176497 | rs73176497 | 0      | 1     | chr22:44336957 | #N/A             | #N/A    | #N/A    | #N/A     | #N/A  | #N/A         |
| rs738408   | rs738408   | 0      | 1     | chr22:44324730 | #N/A             | #N/A    | #N/A    | #N/A     | #N/A  | #N/A         |
| rs738409   | rs738408   | 3      | 0.955 | chr22:44324730 | #N/A             | #N/A    | #N/A    | #N/A     | #N/A  | #N/A         |
| rs35621602 | rs34352134 | 10     | 1     | chr22:44335416 | #N/A             | #N/A    | #N/A    | #N/A     | #N/A  | #N/A         |
| rs4823176  | rs4823177  | 10     | 1     | chr22:44334486 | #N/A             | #N/A    | #N/A    | #N/A     | #N/A  | #N/A         |
| rs4823177  | rs4823176  | 10     | 1     | chr22:44334476 | #N/A             | #N/A    | #N/A    | #N/A     | #N/A  | #N/A         |
| rs6006468  | rs6006602  | 32     | 1     | chr22:44383400 | #N/A             | #N/A    | #N/A    | #N/A     | #N/A  | #N/A         |
| rs13056638 | rs1883348  | 37     | 1     | chr22:44331815 | #N/A             | #N/A    | #N/A    | #N/A     | #N/A  | #N/A         |
| rs4823177  | rs4823178  | 43     | 1     | chr22:44334529 | #N/A             | #N/A    | #N/A    | #N/A     | #N/A  | #N/A         |

|            |            |      |       |                |      |      |      |      |      |      |
|------------|------------|------|-------|----------------|------|------|------|------|------|------|
| rs3747207  | rs738408   | 125  | 0.955 | chr22:44324730 | #N/A | #N/A | #N/A | #N/A | #N/A | #N/A |
| rs1883349  | rs1883348  | 128  | 1     | chr22:44331815 | #N/A | #N/A | #N/A | #N/A | #N/A | #N/A |
| rs4823108  | rs4823109  | 142  | 1     | chr22:44381482 | #N/A | #N/A | #N/A | #N/A | #N/A | #N/A |
| rs4823109  | rs4823108  | 142  | 1     | chr22:44381340 | #N/A | #N/A | #N/A | #N/A | #N/A | #N/A |
| rs626283   | rs8736     | 188  | 1     | chr19:54677189 | #N/A | #N/A | #N/A | #N/A | #N/A | #N/A |
| rs2076211  | rs2294433  | 197  | 1     | chr22:44329275 | #N/A | #N/A | #N/A | #N/A | #N/A | #N/A |
| rs2294433  | rs2076211  | 197  | 1     | chr22:44329078 | #N/A | #N/A | #N/A | #N/A | #N/A | #N/A |
| rs1010022  | rs1010023  | 212  | 1     | chr22:44336098 | #N/A | #N/A | #N/A | #N/A | #N/A | #N/A |
| rs2896019  | rs2072905  | 215  | 1     | chr22:44333479 | #N/A | #N/A | #N/A | #N/A | #N/A | #N/A |
| rs6006469  | rs6006602  | 217  | 1     | chr22:44383400 | #N/A | #N/A | #N/A | #N/A | #N/A | #N/A |
| rs2072907  | rs34879941 | 225  | 1     | chr22:44332878 | #N/A | #N/A | #N/A | #N/A | #N/A | #N/A |
| rs2294916  | rs4823179  | 271  | 0.843 | chr22:44341193 | #N/A | #N/A | #N/A | #N/A | #N/A | #N/A |
| rs2072906  | rs34879941 | 294  | 1     | chr22:44332878 | #N/A | #N/A | #N/A | #N/A | #N/A | #N/A |
| rs1997693  | rs1883348  | 302  | 1     | chr22:44331815 | #N/A | #N/A | #N/A | #N/A | #N/A | #N/A |
| rs2072906  | rs2072905  | 307  | 1     | chr22:44333479 | #N/A | #N/A | #N/A | #N/A | #N/A | #N/A |
| rs2281135  | rs34879941 | 308  | 1     | chr22:44332878 | #N/A | #N/A | #N/A | #N/A | #N/A | #N/A |
| rs2073081  | rs34352134 | 328  | 1     | chr22:44335416 | #N/A | #N/A | #N/A | #N/A | #N/A | #N/A |
| rs2076211  | rs4823173  | 348  | 1     | chr22:44328730 | #N/A | #N/A | #N/A | #N/A | #N/A | #N/A |
| rs4823173  | rs2076211  | 348  | 1     | chr22:44329078 | #N/A | #N/A | #N/A | #N/A | #N/A | #N/A |
| rs2073081  | rs1010023  | 354  | 1     | chr22:44336098 | #N/A | #N/A | #N/A | #N/A | #N/A | #N/A |
| rs2281137  | rs34879941 | 385  | 0.895 | chr22:44332878 | #N/A | #N/A | #N/A | #N/A | #N/A | #N/A |
| rs2281138  | rs34879941 | 401  | 1     | chr22:44332878 | #N/A | #N/A | #N/A | #N/A | #N/A | #N/A |
| rs4823181  | rs4823179  | 413  | 1     | chr22:44341193 | #N/A | #N/A | #N/A | #N/A | #N/A | #N/A |
| rs2401512  | rs2072905  | 466  | 1     | chr22:44333479 | #N/A | #N/A | #N/A | #N/A | #N/A | #N/A |
| rs13055900 | rs4823179  | 473  | 1     | chr22:44341193 | #N/A | #N/A | #N/A | #N/A | #N/A | #N/A |
| rs13055874 | rs4823179  | 479  | 1     | chr22:44341193 | #N/A | #N/A | #N/A | #N/A | #N/A | #N/A |
| rs2896020  | rs2072905  | 489  | 1     | chr22:44333479 | #N/A | #N/A | #N/A | #N/A | #N/A | #N/A |
| rs2076207  | rs34879941 | 492  | 1     | chr22:44332878 | #N/A | #N/A | #N/A | #N/A | #N/A | #N/A |
| rs2896020  | rs4823176  | 508  | 0.947 | chr22:44334476 | #N/A | #N/A | #N/A | #N/A | #N/A | #N/A |
| rs2896020  | rs4823177  | 518  | 0.947 | chr22:44334486 | #N/A | #N/A | #N/A | #N/A | #N/A | #N/A |
| rs2401512  | rs4823176  | 531  | 0.947 | chr22:44334476 | #N/A | #N/A | #N/A | #N/A | #N/A | #N/A |
| rs2401512  | rs4823177  | 541  | 0.947 | chr22:44334486 | #N/A | #N/A | #N/A | #N/A | #N/A | #N/A |
| rs2294433  | rs4823173  | 545  | 1     | chr22:44328730 | #N/A | #N/A | #N/A | #N/A | #N/A | #N/A |
| rs4823173  | rs2294433  | 545  | 1     | chr22:44329275 | #N/A | #N/A | #N/A | #N/A | #N/A | #N/A |
| rs2896020  | rs4823178  | 561  | 0.947 | chr22:44334529 | #N/A | #N/A | #N/A | #N/A | #N/A | #N/A |
| rs626283   | rs2576452  | 568  | 1     | chr19:54676433 | #N/A | #N/A | #N/A | #N/A | #N/A | #N/A |
| rs11090617 | rs12484700 | 573  | 1     | chr22:44327273 | #N/A | #N/A | #N/A | #N/A | #N/A | #N/A |
| rs926633   | rs73176497 | 576  | 1     | chr22:44336957 | #N/A | #N/A | #N/A | #N/A | #N/A | #N/A |
| rs2401512  | rs4823178  | 584  | 0.947 | chr22:44334529 | #N/A | #N/A | #N/A | #N/A | #N/A | #N/A |
| rs2072905  | rs34879941 | 601  | 1     | chr22:44332878 | #N/A | #N/A | #N/A | #N/A | #N/A | #N/A |
| rs34879941 | rs2072905  | 601  | 1     | chr22:44333479 | #N/A | #N/A | #N/A | #N/A | #N/A | #N/A |
| rs1010022  | rs73176497 | 647  | 1     | chr22:44336957 | #N/A | #N/A | #N/A | #N/A | #N/A | #N/A |
| rs2281138  | rs1883348  | 662  | 1     | chr22:44331815 | #N/A | #N/A | #N/A | #N/A | #N/A | #N/A |
| rs2281137  | rs1883348  | 678  | 0.895 | chr22:44331815 | #N/A | #N/A | #N/A | #N/A | #N/A | #N/A |
| rs1010023  | rs34352134 | 682  | 1     | chr22:44335416 | #N/A | #N/A | #N/A | #N/A | #N/A | #N/A |
| rs34352134 | rs1010023  | 682  | 1     | chr22:44336098 | #N/A | #N/A | #N/A | #N/A | #N/A | #N/A |
| rs35621602 | rs1010023  | 692  | 1     | chr22:44336098 | #N/A | #N/A | #N/A | #N/A | #N/A | #N/A |
| rs10273639 | rs2011216  | 746  | 0.965 | chr7:142457674 | #N/A | #N/A | #N/A | #N/A | #N/A | #N/A |
| rs2281135  | rs1883348  | 755  | 1     | chr22:44331815 | #N/A | #N/A | #N/A | #N/A | #N/A | #N/A |
| rs1977080  | rs2294433  | 756  | 0.941 | chr22:44329275 | #N/A | #N/A | #N/A | #N/A | #N/A | #N/A |
| rs2294433  | rs1977080  | 756  | 0.941 | chr22:44330031 | #N/A | #N/A | #N/A | #N/A | #N/A | #N/A |
| rs16991175 | rs1010023  | 767  | 0.947 | chr22:44336098 | #N/A | #N/A | #N/A | #N/A | #N/A | #N/A |
| rs2896019  | rs4823176  | 782  | 0.947 | chr22:44334476 | #N/A | #N/A | #N/A | #N/A | #N/A | #N/A |
| rs2896019  | rs4823177  | 792  | 0.947 | chr22:44334486 | #N/A | #N/A | #N/A | #N/A | #N/A | #N/A |
| rs16991175 | rs4823178  | 802  | 0.891 | chr22:44334529 | #N/A | #N/A | #N/A | #N/A | #N/A | #N/A |
| rs2896019  | rs34879941 | 816  | 1     | chr22:44332878 | #N/A | #N/A | #N/A | #N/A | #N/A | #N/A |
| rs2072907  | rs2072905  | 826  | 1     | chr22:44333479 | #N/A | #N/A | #N/A | #N/A | #N/A | #N/A |
| rs2896019  | rs4823178  | 835  | 0.947 | chr22:44334529 | #N/A | #N/A | #N/A | #N/A | #N/A | #N/A |
| rs2072907  | rs1883348  | 838  | 1     | chr22:44331815 | #N/A | #N/A | #N/A | #N/A | #N/A | #N/A |
| rs16991175 | rs4823177  | 845  | 0.891 | chr22:44334486 | #N/A | #N/A | #N/A | #N/A | #N/A | #N/A |
| rs1977081  | rs2294433  | 853  | 1     | chr22:44329275 | #N/A | #N/A | #N/A | #N/A | #N/A | #N/A |
| rs2294433  | rs1977081  | 853  | 1     | chr22:44330128 | #N/A | #N/A | #N/A | #N/A | #N/A | #N/A |
| rs16991175 | rs4823176  | 855  | 0.891 | chr22:44334476 | #N/A | #N/A | #N/A | #N/A | #N/A | #N/A |
| rs1010023  | rs73176497 | 859  | 1     | chr22:44336957 | #N/A | #N/A | #N/A | #N/A | #N/A | #N/A |
| rs73176497 | rs1010023  | 859  | 1     | chr22:44336098 | #N/A | #N/A | #N/A | #N/A | #N/A | #N/A |
| rs35621602 | rs4823178  | 877  | 0.947 | chr22:44334529 | #N/A | #N/A | #N/A | #N/A | #N/A | #N/A |
| rs34352134 | rs4823178  | 887  | 0.947 | chr22:44334529 | #N/A | #N/A | #N/A | #N/A | #N/A | #N/A |
| rs4823178  | rs34352134 | 887  | 0.947 | chr22:44335416 | #N/A | #N/A | #N/A | #N/A | #N/A | #N/A |
| rs1010022  | rs34352134 | 894  | 1     | chr22:44335416 | #N/A | #N/A | #N/A | #N/A | #N/A | #N/A |
| rs2281135  | rs2072905  | 909  | 1     | chr22:44333479 | #N/A | #N/A | #N/A | #N/A | #N/A | #N/A |
| rs35621602 | rs4823177  | 920  | 0.947 | chr22:44334486 | #N/A | #N/A | #N/A | #N/A | #N/A | #N/A |
| rs34352134 | rs4823177  | 930  | 0.947 | chr22:44334486 | #N/A | #N/A | #N/A | #N/A | #N/A | #N/A |
| rs35621602 | rs4823176  | 930  | 0.947 | chr22:44334476 | #N/A | #N/A | #N/A | #N/A | #N/A | #N/A |
| rs4823177  | rs34352134 | 930  | 0.947 | chr22:44335416 | #N/A | #N/A | #N/A | #N/A | #N/A | #N/A |
| rs1883349  | rs34879941 | 935  | 1     | chr22:44332878 | #N/A | #N/A | #N/A | #N/A | #N/A | #N/A |
| rs34352134 | rs4823176  | 940  | 0.947 | chr22:44334476 | #N/A | #N/A | #N/A | #N/A | #N/A | #N/A |
| rs4823176  | rs34352134 | 940  | 0.947 | chr22:44335416 | #N/A | #N/A | #N/A | #N/A | #N/A | #N/A |
| rs1977080  | rs2076211  | 953  | 0.941 | chr22:44329078 | #N/A | #N/A | #N/A | #N/A | #N/A | #N/A |
| rs2076211  | rs1977080  | 953  | 0.941 | chr22:44330031 | #N/A | #N/A | #N/A | #N/A | #N/A | #N/A |
| rs10273639 | rs9969188  | 975  | 1     | chr7:142455953 | #N/A | #N/A | #N/A | #N/A | #N/A | #N/A |
| rs2281137  | rs2072905  | 986  | 0.895 | chr22:44333479 | #N/A | #N/A | #N/A | #N/A | #N/A | #N/A |
| rs2072905  | rs4823176  | 997  | 0.947 | chr22:44334476 | #N/A | #N/A | #N/A | #N/A | #N/A | #N/A |
| rs4823176  | rs2072905  | 997  | 0.947 | chr22:44333479 | #N/A | #N/A | #N/A | #N/A | #N/A | #N/A |
| rs9625962  | rs12484700 | 1001 | 1     | chr22:44327273 | #N/A | #N/A | #N/A | #N/A | #N/A | #N/A |
| rs2281138  | rs2072905  | 1002 | 1     | chr22:44333479 | #N/A | #N/A | #N/A | #N/A | #N/A | #N/A |
| rs2072905  | rs4823177  | 1007 | 0.947 | chr22:44334486 | #N/A | #N/A | #N/A | #N/A | #N/A | #N/A |
| rs4823177  | rs2072905  | 1007 | 0.947 | chr22:44333479 | #N/A | #N/A | #N/A | #N/A | #N/A | #N/A |
| rs1977081  | rs2076211  | 1050 | 1     | chr22:44329078 | #N/A | #N/A | #N/A | #N/A | #N/A | #N/A |
| rs2072905  | rs4823178  | 1050 | 0.947 | chr22:44334529 | #N/A | #N/A | #N/A | #N/A | #N/A | #N/A |
| rs2076211  | rs1977081  | 1050 | 1     | chr22:44330128 | #N/A | #N/A | #N/A | #N/A | #N/A | #N/A |
| rs4823178  | rs2072905  | 1050 | 0.947 | chr22:44333479 | #N/A | #N/A | #N/A | #N/A | #N/A | #N/A |
| rs1883348  | rs34879941 | 1063 | 1     | chr22:44332878 | #N/A | #N/A | #N/A | #N/A | #N/A | #N/A |
| rs34879941 | rs1883348  | 1063 | 1     | chr22:44331815 | #N/A | #N/A | #N/A | #N/A | #N/A | #N/A |
| rs2401512  | rs34879941 | 1067 | 1     | chr22:44332878 | #N/A | #N/A | #N/A | #N/A | #N/A | #N/A |
| rs2896020  | rs34879941 | 1090 | 1     | chr22:44332878 | #N/A | #N/A | #N/A | #N/A | #N/A | #N/A |
| rs378604   | rs2235778  | 1097 | 0.902 | chr22:44389514 | #N/A | #N/A | #N/A | #N/A | #N/A | #N/A |
| rs13056638 | rs34879941 | 1100 | 1     | chr22:44332878 | #N/A | #N/A | #N/A | #N/A | #N/A | #N/A |
| rs2076207  | rs4823176  | 1106 | 0.947 | chr22:44334476 | #N/A | #N/A | #N/A | #N/A | #N/A | #N/A |
| rs36069781 | rs4823179  | 1107 | 1     | chr22:44341193 | #N/A | #N/A | #N/A | #N/A | #N/A | #N/A |
| rs2076207  | rs4823177  | 1116 | 0.947 | chr22:44334486 | #N/A | #N/A | #N/A | #N/A | #N/A | #N/A |
| rs2076207  | rs4823178  | 1159 | 0.947 | chr22:44334529 | #N/A | #N/A | #N/A | #N/A | #N/A | #N/A |
| rs2073081  | rs73176497 | 1213 | 1     | chr22:44336957 | #N/A | #N/A | #N/A | #N/A | #N/A | #N/A |
| rs2073081  | rs4823178  | 1215 | 0.947 | chr22:44334529 | #N/A | #N/A | #N/A | #N/A | #N/A | #N/A |
| rs2073081  | rs4823177  | 1258 | 0.947 | chr22:44334486 | #N/A | #N/A | #N/A | #N/A | #N/A | #N/A |
| rs2073081  | rs4823176  | 1268 | 0.947 | chr22:44334476 | #N/A | #N/A | #N/A | #N/A | #N/A | #N/A |
| rs12483959 | rs12484700 | 1277 | 1     | chr22:44327273 | #N/A | #N/A | #N/A | #N/A | #N/A | #N/A |
| rs13055874 | rs2008451  | 1297 | 1     | chr22:44342969 | #N/A | #N/A | #N/A | #N/A | #N/A | #N/A |

|            |            |      |       |                 |      |      |      |      |      |      |
|------------|------------|------|-------|-----------------|------|------|------|------|------|------|
| rs1977080  | rs4823173  | 1301 | 0.941 | chr22:44328730  | #N/A | #N/A | #N/A | #N/A | #N/A | #N/A |
| rs4823173  | rs1977080  | 1301 | 0.941 | chr22:44330031  | #N/A | #N/A | #N/A | #N/A | #N/A | #N/A |
| rs13055900 | rs2008451  | 1303 | 1     | chr22:44342969  | #N/A | #N/A | #N/A | #N/A | #N/A | #N/A |
| rs2072906  | rs4823176  | 1304 | 0.947 | chr22:44334476  | #N/A | #N/A | #N/A | #N/A | #N/A | #N/A |
| rs2072906  | rs4823177  | 1314 | 0.947 | chr22:44334486  | #N/A | #N/A | #N/A | #N/A | #N/A | #N/A |
| rs9626079  | rs4823108  | 1331 | 1     | chr22:443381340 | #N/A | #N/A | #N/A | #N/A | #N/A | #N/A |
| rs2072906  | rs1883348  | 1357 | 1     | chr22:44331815  | #N/A | #N/A | #N/A | #N/A | #N/A | #N/A |
| rs2072906  | rs4823178  | 1357 | 0.947 | chr22:44334529  | #N/A | #N/A | #N/A | #N/A | #N/A | #N/A |
| rs4823181  | rs2008451  | 1363 | 1     | chr22:44342969  | #N/A | #N/A | #N/A | #N/A | #N/A | #N/A |
| rs1997693  | rs34879941 | 1365 | 1     | chr22:44332878  | #N/A | #N/A | #N/A | #N/A | #N/A | #N/A |
| rs1997693  | rs1977081  | 1385 | 0.843 | chr22:44330128  | #N/A | #N/A | #N/A | #N/A | #N/A | #N/A |
| rs1977081  | rs4823173  | 1398 | 1     | chr22:44328730  | #N/A | #N/A | #N/A | #N/A | #N/A | #N/A |
| rs4823173  | rs1977081  | 1398 | 1     | chr22:44330128  | #N/A | #N/A | #N/A | #N/A | #N/A | #N/A |
| rs926633   | rs1010023  | 1435 | 1     | chr22:44336098  | #N/A | #N/A | #N/A | #N/A | #N/A | #N/A |
| rs2896020  | rs34352134 | 1448 | 1     | chr22:44335416  | #N/A | #N/A | #N/A | #N/A | #N/A | #N/A |
| rs12484700 | rs4823173  | 1457 | 1     | chr22:44328730  | #N/A | #N/A | #N/A | #N/A | #N/A | #N/A |
| rs4823173  | rs12484700 | 1457 | 1     | chr22:44327273  | #N/A | #N/A | #N/A | #N/A | #N/A | #N/A |
| rs2401512  | rs34352134 | 1471 | 1     | chr22:44335416  | #N/A | #N/A | #N/A | #N/A | #N/A | #N/A |
| rs9626079  | rs4823109  | 1473 | 1     | chr22:443381482 | #N/A | #N/A | #N/A | #N/A | #N/A | #N/A |
| rs1883349  | rs2072905  | 1536 | 1     | chr22:44333479  | #N/A | #N/A | #N/A | #N/A | #N/A | #N/A |
| rs36055245 | rs4823173  | 1538 | 1     | chr22:44328730  | #N/A | #N/A | #N/A | #N/A | #N/A | #N/A |
| rs34352134 | rs73176497 | 1541 | 1     | chr22:44336957  | #N/A | #N/A | #N/A | #N/A | #N/A | #N/A |
| rs73176497 | rs34352134 | 1541 | 1     | chr22:44335416  | #N/A | #N/A | #N/A | #N/A | #N/A | #N/A |
| rs16991158 | rs4823173  | 1551 | 0.941 | chr22:44328730  | #N/A | #N/A | #N/A | #N/A | #N/A | #N/A |
| rs35621602 | rs73176497 | 1551 | 1     | chr22:44336957  | #N/A | #N/A | #N/A | #N/A | #N/A | #N/A |
| rs2072607  | rs1883348  | 1555 | 1     | chr22:44331815  | #N/A | #N/A | #N/A | #N/A | #N/A | #N/A |
| rs1010023  | rs4823178  | 1569 | 0.947 | chr22:44334529  | #N/A | #N/A | #N/A | #N/A | #N/A | #N/A |
| rs4823178  | rs1010023  | 1569 | 0.947 | chr22:44336098  | #N/A | #N/A | #N/A | #N/A | #N/A | #N/A |
| rs34879941 | rs4823176  | 1598 | 0.947 | chr22:44334476  | #N/A | #N/A | #N/A | #N/A | #N/A | #N/A |
| rs4823176  | rs34879941 | 1598 | 0.947 | chr22:44332878  | #N/A | #N/A | #N/A | #N/A | #N/A | #N/A |
| rs2294923  | rs4823108  | 1600 | 1     | chr22:44381340  | #N/A | #N/A | #N/A | #N/A | #N/A | #N/A |
| rs34879941 | rs4823177  | 1608 | 0.947 | chr22:44334486  | #N/A | #N/A | #N/A | #N/A | #N/A | #N/A |
| rs4823177  | rs34879941 | 1608 | 0.947 | chr22:44332878  | #N/A | #N/A | #N/A | #N/A | #N/A | #N/A |
| rs1010023  | rs4823177  | 1612 | 0.947 | chr22:44334486  | #N/A | #N/A | #N/A | #N/A | #N/A | #N/A |
| rs4823177  | rs1010023  | 1612 | 0.947 | chr22:44336098  | #N/A | #N/A | #N/A | #N/A | #N/A | #N/A |
| rs1010023  | rs4823176  | 1622 | 0.947 | chr22:44334476  | #N/A | #N/A | #N/A | #N/A | #N/A | #N/A |
| rs4823176  | rs1010023  | 1622 | 0.947 | chr22:44336098  | #N/A | #N/A | #N/A | #N/A | #N/A | #N/A |
| rs16991175 | rs73176497 | 1626 | 0.947 | chr22:44336957  | #N/A | #N/A | #N/A | #N/A | #N/A | #N/A |
| rs13056638 | rs1977081  | 1650 | 0.843 | chr22:44330128  | #N/A | #N/A | #N/A | #N/A | #N/A | #N/A |
| rs34879941 | rs4823178  | 1651 | 0.947 | chr22:44334529  | #N/A | #N/A | #N/A | #N/A | #N/A | #N/A |
| rs4823178  | rs34879941 | 1651 | 0.947 | chr22:44332878  | #N/A | #N/A | #N/A | #N/A | #N/A | #N/A |
| rs1883348  | rs2072905  | 1664 | 1     | chr22:44333479  | #N/A | #N/A | #N/A | #N/A | #N/A | #N/A |
| rs2072905  | rs1883348  | 1664 | 1     | chr22:44331815  | #N/A | #N/A | #N/A | #N/A | #N/A | #N/A |
| rs13056555 | rs4823179  | 1667 | 1     | chr22:44341193  | #N/A | #N/A | #N/A | #N/A | #N/A | #N/A |
| rs4823180  | rs2008451  | 1671 | 1     | chr22:44342969  | #N/A | #N/A | #N/A | #N/A | #N/A | #N/A |
| rs1883348  | rs1977081  | 1687 | 0.843 | chr22:44330128  | #N/A | #N/A | #N/A | #N/A | #N/A | #N/A |
| rs1977081  | rs1883348  | 1687 | 0.843 | chr22:44331815  | #N/A | #N/A | #N/A | #N/A | #N/A | #N/A |
| rs13056638 | rs2072905  | 1701 | 1     | chr22:44333479  | #N/A | #N/A | #N/A | #N/A | #N/A | #N/A |
| rs2896019  | rs34352134 | 1722 | 1     | chr22:44335416  | #N/A | #N/A | #N/A | #N/A | #N/A | #N/A |
| rs2294923  | rs4823109  | 1742 | 1     | chr22:44381482  | #N/A | #N/A | #N/A | #N/A | #N/A | #N/A |
| rs2008451  | rs4823179  | 1776 | 1     | chr22:44341193  | #N/A | #N/A | #N/A | #N/A | #N/A | #N/A |
| rs4823179  | rs2008451  | 1776 | 1     | chr22:44342969  | #N/A | #N/A | #N/A | #N/A | #N/A | #N/A |
| rs1010022  | rs4823178  | 1781 | 0.947 | chr22:44334529  | #N/A | #N/A | #N/A | #N/A | #N/A | #N/A |
| rs12484700 | rs2076211  | 1805 | 1     | chr22:44329078  | #N/A | #N/A | #N/A | #N/A | #N/A | #N/A |
| rs2076211  | rs12484700 | 1805 | 1     | chr22:44327273  | #N/A | #N/A | #N/A | #N/A | #N/A | #N/A |
| rs1883349  | rs1977081  | 1815 | 0.843 | chr22:44330128  | #N/A | #N/A | #N/A | #N/A | #N/A | #N/A |
| rs2072907  | rs4823176  | 1823 | 0.947 | chr22:44334476  | #N/A | #N/A | #N/A | #N/A | #N/A | #N/A |
| rs1010022  | rs4823177  | 1824 | 0.947 | chr22:44334486  | #N/A | #N/A | #N/A | #N/A | #N/A | #N/A |
| rs2072907  | rs4823177  | 1833 | 0.947 | chr22:44334486  | #N/A | #N/A | #N/A | #N/A | #N/A | #N/A |
| rs1010022  | rs4823176  | 1834 | 0.947 | chr22:44334476  | #N/A | #N/A | #N/A | #N/A | #N/A | #N/A |
| rs16991175 | rs2072905  | 1852 | 0.947 | chr22:44333479  | #N/A | #N/A | #N/A | #N/A | #N/A | #N/A |
| rs2072907  | rs4823178  | 1876 | 0.947 | chr22:44334529  | #N/A | #N/A | #N/A | #N/A | #N/A | #N/A |
| rs2896019  | rs1883348  | 1879 | 1     | chr22:44331815  | #N/A | #N/A | #N/A | #N/A | #N/A | #N/A |
| rs36055245 | rs2076211  | 1886 | 1     | chr22:44329078  | #N/A | #N/A | #N/A | #N/A | #N/A | #N/A |
| rs16991158 | rs2076211  | 1899 | 0.941 | chr22:44329078  | #N/A | #N/A | #N/A | #N/A | #N/A | #N/A |
| rs2281135  | rs4823176  | 1906 | 0.947 | chr22:44334476  | #N/A | #N/A | #N/A | #N/A | #N/A | #N/A |
| rs2281135  | rs4823177  | 1916 | 0.947 | chr22:44334486  | #N/A | #N/A | #N/A | #N/A | #N/A | #N/A |
| rs35621602 | rs2072905  | 1927 | 1     | chr22:44333479  | #N/A | #N/A | #N/A | #N/A | #N/A | #N/A |
| rs2072905  | rs34352134 | 1937 | 1     | chr22:44335416  | #N/A | #N/A | #N/A | #N/A | #N/A | #N/A |
| rs34352134 | rs2072905  | 1937 | 1     | chr22:44333479  | #N/A | #N/A | #N/A | #N/A | #N/A | #N/A |
| rs2281135  | rs4823178  | 1959 | 0.947 | chr22:44334529  | #N/A | #N/A | #N/A | #N/A | #N/A | #N/A |
| rs1997693  | rs2072905  | 1966 | 1     | chr22:44333479  | #N/A | #N/A | #N/A | #N/A | #N/A | #N/A |
| rs2281137  | rs4823176  | 1983 | 0.836 | chr22:44334476  | #N/A | #N/A | #N/A | #N/A | #N/A | #N/A |
| rs2281137  | rs4823177  | 1993 | 0.836 | chr22:44334486  | #N/A | #N/A | #N/A | #N/A | #N/A | #N/A |
| rs2281138  | rs4823176  | 1999 | 0.947 | chr22:44334476  | #N/A | #N/A | #N/A | #N/A | #N/A | #N/A |
| rs12484700 | rs2294433  | 2002 | 1     | chr22:44329275  | #N/A | #N/A | #N/A | #N/A | #N/A | #N/A |
| rs2294433  | rs12484700 | 2002 | 1     | chr22:44327273  | #N/A | #N/A | #N/A | #N/A | #N/A | #N/A |
| rs2281138  | rs4823177  | 2009 | 0.947 | chr22:44334486  | #N/A | #N/A | #N/A | #N/A | #N/A | #N/A |
| rs11090617 | rs4823173  | 2030 | 1     | chr22:44328730  | #N/A | #N/A | #N/A | #N/A | #N/A | #N/A |
| rs2281137  | rs4823178  | 2036 | 0.836 | chr22:44334529  | #N/A | #N/A | #N/A | #N/A | #N/A | #N/A |
| rs2072607  | rs34352134 | 2046 | 1     | chr22:44335416  | #N/A | #N/A | #N/A | #N/A | #N/A | #N/A |
| rs2294916  | rs2008451  | 2047 | 0.843 | chr22:44342969  | #N/A | #N/A | #N/A | #N/A | #N/A | #N/A |
| rs2281138  | rs4823178  | 2052 | 0.947 | chr22:44334529  | #N/A | #N/A | #N/A | #N/A | #N/A | #N/A |
| rs36055245 | rs2294433  | 2083 | 1     | chr22:44329275  | #N/A | #N/A | #N/A | #N/A | #N/A | #N/A |
| rs16991158 | rs2294433  | 2096 | 0.941 | chr22:44329275  | #N/A | #N/A | #N/A | #N/A | #N/A | #N/A |
| rs926633   | rs34352134 | 2117 | 1     | chr22:44335416  | #N/A | #N/A | #N/A | #N/A | #N/A | #N/A |
| rs2401512  | rs1883348  | 2130 | 1     | chr22:44331815  | #N/A | #N/A | #N/A | #N/A | #N/A | #N/A |
| rs2896020  | rs1010023  | 2130 | 1     | chr22:44336098  | #N/A | #N/A | #N/A | #N/A | #N/A | #N/A |
| rs2401512  | rs1010023  | 2153 | 1     | chr22:44336098  | #N/A | #N/A | #N/A | #N/A | #N/A | #N/A |
| rs2896020  | rs1883348  | 2153 | 1     | chr22:44331815  | #N/A | #N/A | #N/A | #N/A | #N/A | #N/A |
| rs1997693  | rs2294433  | 2238 | 0.843 | chr22:44329275  | #N/A | #N/A | #N/A | #N/A | #N/A | #N/A |
| rs2072906  | rs34352134 | 2244 | 1     | chr22:44335416  | #N/A | #N/A | #N/A | #N/A | #N/A | #N/A |
| rs626283   | rs4806498  | 2259 | 0.9   | chr19:54674742  | #N/A | #N/A | #N/A | #N/A | #N/A | #N/A |
| rs2073081  | rs2072905  | 2265 | 1     | chr22:44333479  | #N/A | #N/A | #N/A | #N/A | #N/A | #N/A |
| rs2281138  | rs1977081  | 2349 | 0.843 | chr22:44330128  | #N/A | #N/A | #N/A | #N/A | #N/A | #N/A |
| rs11090617 | rs2076211  | 2378 | 1     | chr22:44329078  | #N/A | #N/A | #N/A | #N/A | #N/A | #N/A |
| rs2896019  | rs1010023  | 2404 | 1     | chr22:44336098  | #N/A | #N/A | #N/A | #N/A | #N/A | #N/A |
| rs2281298  | rs3827385  | 2417 | 1     | chr22:44388817  | #N/A | #N/A | #N/A | #N/A | #N/A | #N/A |
| rs4823178  | rs73176497 | 2428 | 0.947 | chr22:44336957  | #N/A | #N/A | #N/A | #N/A | #N/A | #N/A |
| rs73176497 | rs4823178  | 2428 | 0.947 | chr22:44334529  | #N/A | #N/A | #N/A | #N/A | #N/A | #N/A |
| rs1997693  | rs2076211  | 2435 | 0.843 | chr22:44329078  | #N/A | #N/A | #N/A | #N/A | #N/A | #N/A |
| rs2281135  | rs1977081  | 2442 | 0.843 | chr22:44330128  | #N/A | #N/A | #N/A | #N/A | #N/A | #N/A |
| rs16991175 | rs34879941 | 2453 | 0.947 | chr22:44332878  | #N/A | #N/A | #N/A | #N/A | #N/A | #N/A |
| rs9625962  | rs4823173  | 2458 | 1     | chr22:44328730  | #N/A | #N/A | #N/A | #N/A | #N/A | #N/A |
| rs4823177  | rs73176497 | 2471 | 0.947 | chr22:44336957  | #N/A | #N/A | #N/A | #N/A | #N/A | #N/A |
| rs73176497 | rs4823177  | 2471 | 0.947 | chr22:44334486  | #N/A | #N/A | #N/A | #N/A | #N/A | #N/A |
| rs4823176  | rs73176497 | 2481 | 0.947 | chr22:44336957  | #N/A | #N/A | #N/A | #N/A | #N/A | #N/A |

|            |            |      |       |                |      |      |      |      |      |      |
|------------|------------|------|-------|----------------|------|------|------|------|------|------|
| rs73176497 | rs4823176  | 2481 | 0.947 | chr22:44334476 | #N/A | #N/A | #N/A | #N/A | #N/A | #N/A |
| rs13056638 | rs2294433  | 2503 | 0.843 | chr22:44329275 | #N/A | #N/A | #N/A | #N/A | #N/A | #N/A |
| rs2072907  | rs1977081  | 2525 | 0.843 | chr22:44330128 | #N/A | #N/A | #N/A | #N/A | #N/A | #N/A |
| rs35621602 | rs34879941 | 2528 | 1     | chr22:44332878 | #N/A | #N/A | #N/A | #N/A | #N/A | #N/A |
| rs2235777  | rs4823108  | 2531 | 1     | chr22:44381340 | #N/A | #N/A | #N/A | #N/A | #N/A | #N/A |
| rs1883349  | rs4823176  | 2533 | 0.947 | chr22:44334476 | #N/A | #N/A | #N/A | #N/A | #N/A | #N/A |
| rs34352134 | rs34879941 | 2538 | 1     | chr22:44332878 | #N/A | #N/A | #N/A | #N/A | #N/A | #N/A |
| rs34879941 | rs34352134 | 2538 | 1     | chr22:44335416 | #N/A | #N/A | #N/A | #N/A | #N/A | #N/A |
| rs1883348  | rs2294433  | 2540 | 0.843 | chr22:44329275 | #N/A | #N/A | #N/A | #N/A | #N/A | #N/A |
| rs2294433  | rs1883348  | 2540 | 0.843 | chr22:44331815 | #N/A | #N/A | #N/A | #N/A | #N/A | #N/A |
| rs1883349  | rs4823177  | 2543 | 0.947 | chr22:44334486 | #N/A | #N/A | #N/A | #N/A | #N/A | #N/A |
| rs13056555 | rs73176497 | 2569 | 1     | chr22:44336957 | #N/A | #N/A | #N/A | #N/A | #N/A | #N/A |
| rs11090617 | rs2294433  | 2575 | 1     | chr22:44329275 | #N/A | #N/A | #N/A | #N/A | #N/A | #N/A |
| rs1883349  | rs4823178  | 2586 | 0.947 | chr22:44334529 | #N/A | #N/A | #N/A | #N/A | #N/A | #N/A |
| rs1010023  | rs2072905  | 2619 | 1     | chr22:44333479 | #N/A | #N/A | #N/A | #N/A | #N/A | #N/A |
| rs2072905  | rs1010023  | 2619 | 1     | chr22:44336098 | #N/A | #N/A | #N/A | #N/A | #N/A | #N/A |
| rs1883348  | rs4823176  | 2661 | 0.947 | chr22:44334476 | #N/A | #N/A | #N/A | #N/A | #N/A | #N/A |
| rs4823176  | rs1883348  | 2661 | 0.947 | chr22:44331815 | #N/A | #N/A | #N/A | #N/A | #N/A | #N/A |
| rs1883349  | rs2294433  | 2668 | 0.843 | chr22:44329275 | #N/A | #N/A | #N/A | #N/A | #N/A | #N/A |
| rs1883348  | rs4823177  | 2671 | 0.947 | chr22:44334486 | #N/A | #N/A | #N/A | #N/A | #N/A | #N/A |
| rs4823177  | rs1883348  | 2671 | 0.947 | chr22:44331815 | #N/A | #N/A | #N/A | #N/A | #N/A | #N/A |
| rs2235777  | rs4823109  | 2673 | 1     | chr22:44381482 | #N/A | #N/A | #N/A | #N/A | #N/A | #N/A |
| rs13056638 | rs4823176  | 2698 | 0.947 | chr22:44334476 | #N/A | #N/A | #N/A | #N/A | #N/A | #N/A |
| rs13056638 | rs2076211  | 2700 | 0.843 | chr22:44329078 | #N/A | #N/A | #N/A | #N/A | #N/A | #N/A |
| rs13056638 | rs4823177  | 2708 | 0.947 | chr22:44334486 | #N/A | #N/A | #N/A | #N/A | #N/A | #N/A |
| rs1883348  | rs4823178  | 2714 | 0.947 | chr22:44334529 | #N/A | #N/A | #N/A | #N/A | #N/A | #N/A |
| rs4823178  | rs1883348  | 2714 | 0.947 | chr22:44331815 | #N/A | #N/A | #N/A | #N/A | #N/A | #N/A |
| rs2076207  | rs1010023  | 2728 | 1     | chr22:44336098 | #N/A | #N/A | #N/A | #N/A | #N/A | #N/A |
| rs12483959 | rs4823173  | 2734 | 1     | chr22:44328730 | #N/A | #N/A | #N/A | #N/A | #N/A | #N/A |
| rs1883348  | rs2076211  | 2737 | 0.843 | chr22:44329078 | #N/A | #N/A | #N/A | #N/A | #N/A | #N/A |
| rs2076211  | rs1883348  | 2737 | 0.843 | chr22:44331815 | #N/A | #N/A | #N/A | #N/A | #N/A | #N/A |
| rs1977081  | rs34879941 | 2750 | 0.843 | chr22:44332878 | #N/A | #N/A | #N/A | #N/A | #N/A | #N/A |
| rs34879941 | rs1977081  | 2750 | 0.843 | chr22:44330128 | #N/A | #N/A | #N/A | #N/A | #N/A | #N/A |
| rs3056638  | rs4823178  | 2751 | 0.947 | chr22:44334529 | #N/A | #N/A | #N/A | #N/A | #N/A | #N/A |
| rs12484700 | rs1977080  | 2758 | 0.941 | chr22:44330031 | #N/A | #N/A | #N/A | #N/A | #N/A | #N/A |
| rs1977080  | rs12484700 | 2758 | 0.941 | chr22:44327273 | #N/A | #N/A | #N/A | #N/A | #N/A | #N/A |
| rs2072907  | rs34352134 | 2763 | 1     | chr22:44335416 | #N/A | #N/A | #N/A | #N/A | #N/A | #N/A |
| rs1997693  | rs4823173  | 2783 | 0.843 | chr22:44328730 | #N/A | #N/A | #N/A | #N/A | #N/A | #N/A |
| rs9625962  | rs2076211  | 2806 | 1     | chr22:44329078 | #N/A | #N/A | #N/A | #N/A | #N/A | #N/A |
| rs1010022  | rs2072905  | 2831 | 1     | chr22:44333479 | #N/A | #N/A | #N/A | #N/A | #N/A | #N/A |
| rs36055245 | rs1977080  | 2839 | 0.941 | chr22:44330031 | #N/A | #N/A | #N/A | #N/A | #N/A | #N/A |
| rs2281135  | rs34352134 | 2846 | 1     | chr22:44335416 | #N/A | #N/A | #N/A | #N/A | #N/A | #N/A |
| rs16991158 | rs1977080  | 2852 | 0.878 | chr22:44330031 | #N/A | #N/A | #N/A | #N/A | #N/A | #N/A |
| rs12484700 | rs1977081  | 2855 | 1     | chr22:44330128 | #N/A | #N/A | #N/A | #N/A | #N/A | #N/A |
| rs1977081  | rs12484700 | 2855 | 1     | chr22:44327273 | #N/A | #N/A | #N/A | #N/A | #N/A | #N/A |
| rs1883349  | rs2076211  | 2865 | 0.843 | chr22:44329078 | #N/A | #N/A | #N/A | #N/A | #N/A | #N/A |
| rs2073081  | rs34879941 | 2866 | 1     | chr22:44332878 | #N/A | #N/A | #N/A | #N/A | #N/A | #N/A |
| rs2143571  | rs3827385  | 2869 | 1     | chr22:44388817 | #N/A | #N/A | #N/A | #N/A | #N/A | #N/A |
| rs36069781 | rs2008451  | 2883 | 1     | chr22:44342969 | #N/A | #N/A | #N/A | #N/A | #N/A | #N/A |
| rs2281137  | rs34352134 | 2923 | 0.895 | chr22:44335416 | #N/A | #N/A | #N/A | #N/A | #N/A | #N/A |
| rs2072906  | rs1010023  | 2926 | 1     | chr22:44336098 | #N/A | #N/A | #N/A | #N/A | #N/A | #N/A |
| rs36055245 | rs1977081  | 2936 | 1     | chr22:44330128 | #N/A | #N/A | #N/A | #N/A | #N/A | #N/A |
| rs2281138  | rs34352134 | 2939 | 1     | chr22:44335416 | #N/A | #N/A | #N/A | #N/A | #N/A | #N/A |
| rs16991158 | rs1977081  | 2949 | 0.941 | chr22:44330128 | #N/A | #N/A | #N/A | #N/A | #N/A | #N/A |
| rs1997693  | rs4823176  | 2963 | 0.947 | chr22:44334476 | #N/A | #N/A | #N/A | #N/A | #N/A | #N/A |
| rs1997693  | rs4823177  | 2973 | 0.947 | chr22:44334486 | #N/A | #N/A | #N/A | #N/A | #N/A | #N/A |
| rs2896020  | rs73176497 | 2989 | 1     | chr22:44336957 | #N/A | #N/A | #N/A | #N/A | #N/A | #N/A |
| rs9625962  | rs2294433  | 3003 | 1     | chr22:44329275 | #N/A | #N/A | #N/A | #N/A | #N/A | #N/A |
| rs926633   | rs4823178  | 3004 | 0.947 | chr22:44334529 | #N/A | #N/A | #N/A | #N/A | #N/A | #N/A |
| rs2401512  | rs73176497 | 3012 | 1     | chr22:44336957 | #N/A | #N/A | #N/A | #N/A | #N/A | #N/A |
| rs1997693  | rs4823178  | 3016 | 0.947 | chr22:44334529 | #N/A | #N/A | #N/A | #N/A | #N/A | #N/A |
| rs2072906  | rs1977081  | 3044 | 0.843 | chr22:44330128 | #N/A | #N/A | #N/A | #N/A | #N/A | #N/A |
| rs926633   | rs4823177  | 3047 | 0.947 | chr22:44334486 | #N/A | #N/A | #N/A | #N/A | #N/A | #N/A |
| rs13056638 | rs4823173  | 3048 | 0.843 | chr22:44328730 | #N/A | #N/A | #N/A | #N/A | #N/A | #N/A |
| rs926633   | rs4823176  | 3057 | 0.947 | chr22:44334476 | #N/A | #N/A | #N/A | #N/A | #N/A | #N/A |
| rs12483959 | rs2076211  | 3082 | 1     | chr22:44329078 | #N/A | #N/A | #N/A | #N/A | #N/A | #N/A |
| rs1883348  | rs4823173  | 3085 | 0.843 | chr22:44328730 | #N/A | #N/A | #N/A | #N/A | #N/A | #N/A |
| rs4823173  | rs1883348  | 3085 | 0.843 | chr22:44331815 | #N/A | #N/A | #N/A | #N/A | #N/A | #N/A |
| rs36069781 | rs73176497 | 3129 | 1     | chr22:44336957 | #N/A | #N/A | #N/A | #N/A | #N/A | #N/A |
| rs2281138  | rs2294433  | 3202 | 0.843 | chr22:44329275 | #N/A | #N/A | #N/A | #N/A | #N/A | #N/A |
| rs1883349  | rs4823173  | 3213 | 0.843 | chr22:44328730 | #N/A | #N/A | #N/A | #N/A | #N/A | #N/A |
| rs1010023  | rs34879941 | 3220 | 1     | chr22:44332878 | #N/A | #N/A | #N/A | #N/A | #N/A | #N/A |
| rs34879941 | rs1010023  | 3220 | 1     | chr22:44336098 | #N/A | #N/A | #N/A | #N/A | #N/A | #N/A |
| rs2073079  | rs3827385  | 3223 | 1     | chr22:44388817 | #N/A | #N/A | #N/A | #N/A | #N/A | #N/A |
| rs2076207  | rs1977081  | 3242 | 0.843 | chr22:44330128 | #N/A | #N/A | #N/A | #N/A | #N/A | #N/A |
| rs2896019  | rs73176497 | 3263 | 1     | chr22:44336957 | #N/A | #N/A | #N/A | #N/A | #N/A | #N/A |
| rs12483959 | rs2294433  | 3279 | 1     | chr22:44329275 | #N/A | #N/A | #N/A | #N/A | #N/A | #N/A |
| rs2281135  | rs2294433  | 3295 | 0.843 | chr22:44329275 | #N/A | #N/A | #N/A | #N/A | #N/A | #N/A |
| rs11090617 | rs1977080  | 3331 | 0.941 | chr22:44330031 | #N/A | #N/A | #N/A | #N/A | #N/A | #N/A |
| rs2235776  | rs4823108  | 3341 | 1     | chr22:44381340 | #N/A | #N/A | #N/A | #N/A | #N/A | #N/A |
| rs1977081  | rs2072905  | 3351 | 0.843 | chr22:44333479 | #N/A | #N/A | #N/A | #N/A | #N/A | #N/A |
| rs2072905  | rs1977081  | 3351 | 0.843 | chr22:44330128 | #N/A | #N/A | #N/A | #N/A | #N/A | #N/A |
| rs2072907  | rs2294433  | 3378 | 0.843 | chr22:44329275 | #N/A | #N/A | #N/A | #N/A | #N/A | #N/A |
| rs10273639 | rs6666     | 3385 | 1     | chr7:142460313 | #N/A | #N/A | #N/A | #N/A | #N/A | #N/A |
| rs2281138  | rs2076211  | 3399 | 0.843 | chr22:44329078 | #N/A | #N/A | #N/A | #N/A | #N/A | #N/A |
| rs11090617 | rs1977081  | 3428 | 1     | chr22:44330128 | #N/A | #N/A | #N/A | #N/A | #N/A | #N/A |
| rs13056555 | rs1010023  | 3428 | 1     | chr22:44336098 | #N/A | #N/A | #N/A | #N/A | #N/A | #N/A |
| rs1010022  | rs34879941 | 3432 | 1     | chr22:44332878 | #N/A | #N/A | #N/A | #N/A | #N/A | #N/A |
| rs13056555 | rs2008451  | 3443 | 1     | chr22:44342969 | #N/A | #N/A | #N/A | #N/A | #N/A | #N/A |
| rs2072907  | rs1010023  | 3445 | 1     | chr22:44336098 | #N/A | #N/A | #N/A | #N/A | #N/A | #N/A |
| rs1883349  | rs34352134 | 3473 | 1     | chr22:44335416 | #N/A | #N/A | #N/A | #N/A | #N/A | #N/A |
| rs2072905  | rs73176497 | 3478 | 1     | chr22:44336957 | #N/A | #N/A | #N/A | #N/A | #N/A | #N/A |
| rs73176497 | rs2072905  | 3478 | 1     | chr22:44333479 | #N/A | #N/A | #N/A | #N/A | #N/A | #N/A |
| rs2235776  | rs4823109  | 3483 | 1     | chr22:44381482 | #N/A | #N/A | #N/A | #N/A | #N/A | #N/A |
| rs2281135  | rs2076211  | 3492 | 0.843 | chr22:44329078 | #N/A | #N/A | #N/A | #N/A | #N/A | #N/A |
| rs16991175 | rs1883348  | 3516 | 0.947 | chr22:44331815 | #N/A | #N/A | #N/A | #N/A | #N/A | #N/A |
| rs2281135  | rs1010023  | 3528 | 1     | chr22:44336098 | #N/A | #N/A | #N/A | #N/A | #N/A | #N/A |
| rs6006473  | rs2235778  | 3561 | 0.902 | chr22:44389514 | #N/A | #N/A | #N/A | #N/A | #N/A | #N/A |
| rs2896019  | rs1977081  | 3566 | 0.843 | chr22:44330128 | #N/A | #N/A | #N/A | #N/A | #N/A | #N/A |
| rs2072907  | rs2076211  | 3575 | 0.843 | chr22:44329078 | #N/A | #N/A | #N/A | #N/A | #N/A | #N/A |
| rs2076207  | rs73176497 | 3587 | 1     | chr22:44336957 | #N/A | #N/A | #N/A | #N/A | #N/A | #N/A |
| rs35621602 | rs1883348  | 3591 | 1     | chr22:44331815 | #N/A | #N/A | #N/A | #N/A | #N/A | #N/A |
| rs1883348  | rs34352134 | 3601 | 1     | chr22:44335416 | #N/A | #N/A | #N/A | #N/A | #N/A | #N/A |
| rs34352134 | rs1883348  | 3601 | 1     | chr22:44331815 | #N/A | #N/A | #N/A | #N/A | #N/A | #N/A |
| rs2294433  | rs34879941 | 3603 | 0.843 | chr22:44332878 | #N/A | #N/A | #N/A | #N/A | #N/A | #N/A |
| rs34879941 | rs2294433  | 3603 | 0.843 | chr22:44329275 | #N/A | #N/A | #N/A | #N/A | #N/A | #N/A |
| rs2281137  | rs1010023  | 3605 | 0.895 | chr22:44336098 | #N/A | #N/A | #N/A | #N/A | #N/A | #N/A |

|            |            |      |       |                |      |      |      |      |      |      |
|------------|------------|------|-------|----------------|------|------|------|------|------|------|
| rs2281138  | rs1010023  | 3621 | 1     | chr22:44336098 | #N/A | #N/A | #N/A | #N/A | #N/A | #N/A |
| rs13056638 | rs34352134 | 3638 | 1     | chr22:44335416 | #N/A | #N/A | #N/A | #N/A | #N/A | #N/A |
| rs926633   | rs4823179  | 3660 | 1     | chr22:44341193 | #N/A | #N/A | #N/A | #N/A | #N/A | #N/A |
| rs2281138  | rs4823173  | 3747 | 0.843 | chr22:44328730 | #N/A | #N/A | #N/A | #N/A | #N/A | #N/A |
| rs9625962  | rs1977080  | 3759 | 0.941 | chr22:44330031 | #N/A | #N/A | #N/A | #N/A | #N/A | #N/A |
| rs2072906  | rs73176497 | 3785 | 1     | chr22:44336957 | #N/A | #N/A | #N/A | #N/A | #N/A | #N/A |
| rs2076211  | rs34879941 | 3800 | 0.843 | chr22:44332878 | #N/A | #N/A | #N/A | #N/A | #N/A | #N/A |
| rs34879941 | rs2076211  | 3800 | 0.843 | chr22:44329078 | #N/A | #N/A | #N/A | #N/A | #N/A | #N/A |
| rs2401512  | rs1977081  | 3817 | 0.843 | chr22:44330128 | #N/A | #N/A | #N/A | #N/A | #N/A | #N/A |
| rs2281135  | rs4823173  | 3840 | 0.843 | chr22:44328730 | #N/A | #N/A | #N/A | #N/A | #N/A | #N/A |
| rs2896020  | rs1977081  | 3840 | 0.843 | chr22:44330128 | #N/A | #N/A | #N/A | #N/A | #N/A | #N/A |
| rs9625962  | rs1977081  | 3856 | 1     | chr22:44330128 | #N/A | #N/A | #N/A | #N/A | #N/A | #N/A |
| rs2072906  | rs2294433  | 3897 | 0.843 | chr22:44329275 | #N/A | #N/A | #N/A | #N/A | #N/A | #N/A |
| rs1997693  | rs34352134 | 3903 | 1     | chr22:44335416 | #N/A | #N/A | #N/A | #N/A | #N/A | #N/A |
| rs2072907  | rs4823173  | 3923 | 0.843 | chr22:44328730 | #N/A | #N/A | #N/A | #N/A | #N/A | #N/A |
| rs2073081  | rs1883348  | 3929 | 1     | chr22:44331815 | #N/A | #N/A | #N/A | #N/A | #N/A | #N/A |
| rs2294916  | rs73176497 | 3965 | 0.843 | chr22:44336957 | #N/A | #N/A | #N/A | #N/A | #N/A | #N/A |
| rs36069781 | rs1010023  | 3988 | 1     | chr22:44336098 | #N/A | #N/A | #N/A | #N/A | #N/A | #N/A |
| rs12483959 | rs1977080  | 4035 | 0.941 | chr22:44330031 | #N/A | #N/A | #N/A | #N/A | #N/A | #N/A |
| rs926633   | rs2072905  | 4054 | 1     | chr22:44333479 | #N/A | #N/A | #N/A | #N/A | #N/A | #N/A |
| rs34879941 | rs73176497 | 4079 | 1     | chr22:44336957 | #N/A | #N/A | #N/A | #N/A | #N/A | #N/A |
| rs73176497 | rs34879941 | 4079 | 1     | chr22:44332878 | #N/A | #N/A | #N/A | #N/A | #N/A | #N/A |
| rs2072906  | rs2076211  | 4094 | 0.843 | chr22:44329078 | #N/A | #N/A | #N/A | #N/A | #N/A | #N/A |
| rs2076207  | rs2294433  | 4095 | 0.843 | chr22:44329275 | #N/A | #N/A | #N/A | #N/A | #N/A | #N/A |
| rs13056555 | rs34352134 | 4110 | 1     | chr22:44335416 | #N/A | #N/A | #N/A | #N/A | #N/A | #N/A |
| rs12483959 | rs1977081  | 4132 | 1     | chr22:44330128 | #N/A | #N/A | #N/A | #N/A | #N/A | #N/A |
| rs34879941 | rs4823173  | 4148 | 0.843 | chr22:44328730 | #N/A | #N/A | #N/A | #N/A | #N/A | #N/A |
| rs4823173  | rs34879941 | 4148 | 0.843 | chr22:44332878 | #N/A | #N/A | #N/A | #N/A | #N/A | #N/A |
| rs1883349  | rs1010023  | 4155 | 1     | chr22:44336098 | #N/A | #N/A | #N/A | #N/A | #N/A | #N/A |
| rs2072905  | rs2294433  | 4204 | 0.843 | chr22:44329275 | #N/A | #N/A | #N/A | #N/A | #N/A | #N/A |
| rs2294433  | rs2072905  | 4204 | 0.843 | chr22:44333479 | #N/A | #N/A | #N/A | #N/A | #N/A | #N/A |
| rs4823179  | rs73176497 | 4236 | 1     | chr22:44336957 | #N/A | #N/A | #N/A | #N/A | #N/A | #N/A |
| rs73176497 | rs4823179  | 4236 | 1     | chr22:44341193 | #N/A | #N/A | #N/A | #N/A | #N/A | #N/A |
| rs1997693  | rs12484700 | 4240 | 0.843 | chr22:44327273 | #N/A | #N/A | #N/A | #N/A | #N/A | #N/A |
| rs2092501  | rs2008451  | 4282 | 0.947 | chr22:44342969 | #N/A | #N/A | #N/A | #N/A | #N/A | #N/A |
| rs1010023  | rs1883348  | 4283 | 1     | chr22:44331815 | #N/A | #N/A | #N/A | #N/A | #N/A | #N/A |
| rs1883348  | rs1010023  | 4283 | 1     | chr22:44336098 | #N/A | #N/A | #N/A | #N/A | #N/A | #N/A |
| rs2076207  | rs2076211  | 4292 | 0.843 | chr22:44329078 | #N/A | #N/A | #N/A | #N/A | #N/A | #N/A |
| rs2072907  | rs73176497 | 4304 | 1     | chr22:44336957 | #N/A | #N/A | #N/A | #N/A | #N/A | #N/A |
| rs13056638 | rs1010023  | 4320 | 1     | chr22:44336098 | #N/A | #N/A | #N/A | #N/A | #N/A | #N/A |
| rs4823180  | rs73176497 | 4341 | 1     | chr22:44336957 | #N/A | #N/A | #N/A | #N/A | #N/A | #N/A |
| rs10273639 | rs10231771 | 4350 | 1     | chr7:142461278 | #N/A | #N/A | #N/A | #N/A | #N/A | #N/A |
| rs2281135  | rs73176497 | 4387 | 1     | chr22:44336957 | #N/A | #N/A | #N/A | #N/A | #N/A | #N/A |
| rs2072905  | rs2076211  | 4401 | 0.843 | chr22:44329078 | #N/A | #N/A | #N/A | #N/A | #N/A | #N/A |
| rs2076211  | rs2072905  | 4401 | 0.843 | chr22:44333479 | #N/A | #N/A | #N/A | #N/A | #N/A | #N/A |
| rs2896019  | rs2294433  | 4419 | 0.843 | chr22:44329275 | #N/A | #N/A | #N/A | #N/A | #N/A | #N/A |
| rs2072906  | rs4823173  | 4442 | 0.843 | chr22:44328730 | #N/A | #N/A | #N/A | #N/A | #N/A | #N/A |
| rs2281137  | rs73176497 | 4464 | 0.895 | chr22:44336957 | #N/A | #N/A | #N/A | #N/A | #N/A | #N/A |
| rs2281138  | rs73176497 | 4480 | 1     | chr22:44336957 | #N/A | #N/A | #N/A | #N/A | #N/A | #N/A |
| rs1010022  | rs1883348  | 4495 | 1     | chr22:44331815 | #N/A | #N/A | #N/A | #N/A | #N/A | #N/A |
| rs13056638 | rs12484700 | 4505 | 0.843 | chr22:44327273 | #N/A | #N/A | #N/A | #N/A | #N/A | #N/A |
| rs12484700 | rs1883348  | 4542 | 0.843 | chr22:44331815 | #N/A | #N/A | #N/A | #N/A | #N/A | #N/A |
| rs1883348  | rs12484700 | 4542 | 0.843 | chr22:44327273 | #N/A | #N/A | #N/A | #N/A | #N/A | #N/A |
| rs1997693  | rs1010023  | 4585 | 1     | chr22:44336098 | #N/A | #N/A | #N/A | #N/A | #N/A | #N/A |
| rs10273639 | rs1811090  | 4608 | 0.966 | chr7:142461536 | #N/A | #N/A | #N/A | #N/A | #N/A | #N/A |
| rs2896019  | rs2076211  | 4616 | 0.843 | chr22:44329078 | #N/A | #N/A | #N/A | #N/A | #N/A | #N/A |
| rs36055245 | rs1883348  | 4623 | 0.843 | chr22:44331815 | #N/A | #N/A | #N/A | #N/A | #N/A | #N/A |
| rs2076207  | rs4823173  | 4640 | 0.843 | chr22:44328730 | #N/A | #N/A | #N/A | #N/A | #N/A | #N/A |
| rs4823181  | rs73176497 | 4649 | 1     | chr22:44336957 | #N/A | #N/A | #N/A | #N/A | #N/A | #N/A |
| rs926633   | rs34879941 | 4655 | 1     | chr22:44332878 | #N/A | #N/A | #N/A | #N/A | #N/A | #N/A |
| rs1883349  | rs12484700 | 4670 | 0.843 | chr22:44327273 | #N/A | #N/A | #N/A | #N/A | #N/A | #N/A |
| rs2401512  | rs2294433  | 4670 | 0.843 | chr22:44329275 | #N/A | #N/A | #N/A | #N/A | #N/A | #N/A |
| rs36069781 | rs34352134 | 4670 | 1     | chr22:44335416 | #N/A | #N/A | #N/A | #N/A | #N/A | #N/A |
| rs2896020  | rs2294433  | 4693 | 0.843 | chr22:44329275 | #N/A | #N/A | #N/A | #N/A | #N/A | #N/A |
| rs13055900 | rs73176497 | 4709 | 1     | chr22:44336957 | #N/A | #N/A | #N/A | #N/A | #N/A | #N/A |
| rs13055874 | rs73176497 | 4715 | 1     | chr22:44336957 | #N/A | #N/A | #N/A | #N/A | #N/A | #N/A |
| rs2072905  | rs4823173  | 4749 | 0.843 | chr22:44328730 | #N/A | #N/A | #N/A | #N/A | #N/A | #N/A |
| rs4823173  | rs2072905  | 4749 | 0.843 | chr22:44333479 | #N/A | #N/A | #N/A | #N/A | #N/A | #N/A |
| rs2294916  | rs1010023  | 4824 | 0.843 | chr22:44336098 | #N/A | #N/A | #N/A | #N/A | #N/A | #N/A |
| rs2401512  | rs2076211  | 4867 | 0.843 | chr22:44329078 | #N/A | #N/A | #N/A | #N/A | #N/A | #N/A |
| rs1010022  | rs4823179  | 4883 | 1     | chr22:44341193 | #N/A | #N/A | #N/A | #N/A | #N/A | #N/A |
| rs2896020  | rs2076211  | 4890 | 0.843 | chr22:44329078 | #N/A | #N/A | #N/A | #N/A | #N/A | #N/A |
| rs2896019  | rs4823173  | 4964 | 0.843 | chr22:44328730 | #N/A | #N/A | #N/A | #N/A | #N/A | #N/A |
| rs13056555 | rs4823178  | 4997 | 0.947 | chr22:44334529 | #N/A | #N/A | #N/A | #N/A | #N/A | #N/A |
| rs1883349  | rs73176497 | 5014 | 1     | chr22:44336957 | #N/A | #N/A | #N/A | #N/A | #N/A | #N/A |
| rs3788604  | rs6006602  | 5017 | 1     | chr22:44383400 | #N/A | #N/A | #N/A | #N/A | #N/A | #N/A |
| rs13056555 | rs4823177  | 5040 | 0.947 | chr22:44334486 | #N/A | #N/A | #N/A | #N/A | #N/A | #N/A |
| rs13056555 | rs4823176  | 5050 | 0.947 | chr22:44334476 | #N/A | #N/A | #N/A | #N/A | #N/A | #N/A |
| rs1010023  | rs4823179  | 5095 | 1     | chr22:44341193 | #N/A | #N/A | #N/A | #N/A | #N/A | #N/A |
| rs4823179  | rs1010023  | 5095 | 1     | chr22:44336098 | #N/A | #N/A | #N/A | #N/A | #N/A | #N/A |
| rs11090617 | rs1883348  | 5115 | 0.843 | chr22:44331815 | #N/A | #N/A | #N/A | #N/A | #N/A | #N/A |
| rs1883348  | rs73176497 | 5142 | 1     | chr22:44336957 | #N/A | #N/A | #N/A | #N/A | #N/A | #N/A |
| rs73176497 | rs1883348  | 5142 | 1     | chr22:44331815 | #N/A | #N/A | #N/A | #N/A | #N/A | #N/A |
| rs13056638 | rs73176497 | 5179 | 1     | chr22:44336957 | #N/A | #N/A | #N/A | #N/A | #N/A | #N/A |
| rs4823180  | rs1010023  | 5200 | 1     | chr22:44336098 | #N/A | #N/A | #N/A | #N/A | #N/A | #N/A |
| rs2401514  | rs3827385  | 5202 | 1     | chr22:44388817 | #N/A | #N/A | #N/A | #N/A | #N/A | #N/A |
| rs2281138  | rs12484700 | 5204 | 0.843 | chr22:44327273 | #N/A | #N/A | #N/A | #N/A | #N/A | #N/A |
| rs2401512  | rs4823173  | 5215 | 0.843 | chr22:44328730 | #N/A | #N/A | #N/A | #N/A | #N/A | #N/A |
| rs2896020  | rs4823173  | 5238 | 0.843 | chr22:44328730 | #N/A | #N/A | #N/A | #N/A | #N/A | #N/A |
| rs35621602 | rs1977081  | 5278 | 0.843 | chr22:44330128 | #N/A | #N/A | #N/A | #N/A | #N/A | #N/A |
| rs1977081  | rs34352134 | 5288 | 0.843 | chr22:44335416 | #N/A | #N/A | #N/A | #N/A | #N/A | #N/A |
| rs34352134 | rs1977081  | 5288 | 0.843 | chr22:44330128 | #N/A | #N/A | #N/A | #N/A | #N/A | #N/A |
| rs2281135  | rs12484700 | 5297 | 0.843 | chr22:44327273 | #N/A | #N/A | #N/A | #N/A | #N/A | #N/A |
| rs2294921  | rs56373884 | 5374 | 1     | chr22:44356468 | #N/A | #N/A | #N/A | #N/A | #N/A | #N/A |
| rs56373884 | rs2294921  | 5374 | 1     | chr22:44361842 | #N/A | #N/A | #N/A | #N/A | #N/A | #N/A |
| rs2072907  | rs12484700 | 5380 | 0.843 | chr22:44327273 | #N/A | #N/A | #N/A | #N/A | #N/A | #N/A |
| rs926633   | rs2008451  | 5436 | 1     | chr22:44342969 | #N/A | #N/A | #N/A | #N/A | #N/A | #N/A |
| rs1997693  | rs73176497 | 5444 | 1     | chr22:44336957 | #N/A | #N/A | #N/A | #N/A | #N/A | #N/A |
| rs2073081  | rs4823179  | 5449 | 1     | chr22:44341193 | #N/A | #N/A | #N/A | #N/A | #N/A | #N/A |
| rs34912062 | rs2008451  | 5477 | 0.947 | chr22:44342969 | #N/A | #N/A | #N/A | #N/A | #N/A | #N/A |
| rs2294916  | rs34352134 | 5506 | 0.843 | chr22:44335416 | #N/A | #N/A | #N/A | #N/A | #N/A | #N/A |
| rs4823181  | rs1010023  | 5508 | 1     | chr22:44336098 | #N/A | #N/A | #N/A | #N/A | #N/A | #N/A |
| rs9625962  | rs1883348  | 5543 | 0.843 | chr22:44331815 | #N/A | #N/A | #N/A | #N/A | #N/A | #N/A |
| rs36069781 | rs4823178  | 5557 | 0.947 | chr22:44334529 | #N/A | #N/A | #N/A | #N/A | #N/A | #N/A |
| rs13055900 | rs1010023  | 5568 | 1     | chr22:44336098 | #N/A | #N/A | #N/A | #N/A | #N/A | #N/A |
| rs13055874 | rs1010023  | 5574 | 1     | chr22:44336098 | #N/A | #N/A | #N/A | #N/A | #N/A | #N/A |
| rs626283   | rs60204587 | 5580 | 0.869 | chr19:54671421 | #N/A | #N/A | #N/A | #N/A | #N/A | #N/A |

|            |            |      |       |                |      |      |      |      |      |      |
|------------|------------|------|-------|----------------|------|------|------|------|------|------|
| rs2073080  | rs3827385  | 5585 | 1     | chr22:44388817 | #N/A | #N/A | #N/A | #N/A | #N/A | #N/A |
| rs36069781 | rs4823177  | 5600 | 0.947 | chr22:44334486 | #N/A | #N/A | #N/A | #N/A | #N/A | #N/A |
| rs12484700 | rs34879941 | 5605 | 0.843 | chr22:44332878 | #N/A | #N/A | #N/A | #N/A | #N/A | #N/A |
| rs34879941 | rs12484700 | 5605 | 0.843 | chr22:44327273 | #N/A | #N/A | #N/A | #N/A | #N/A | #N/A |
| rs36069781 | rs4823176  | 5610 | 0.947 | chr22:44334476 | #N/A | #N/A | #N/A | #N/A | #N/A | #N/A |
| rs2073081  | rs1977081  | 5616 | 0.843 | chr22:44330128 | #N/A | #N/A | #N/A | #N/A | #N/A | #N/A |
| rs36055245 | rs34879941 | 5686 | 0.843 | chr22:44332878 | #N/A | #N/A | #N/A | #N/A | #N/A | #N/A |
| rs926633   | rs1883348  | 5718 | 1     | chr22:44331815 | #N/A | #N/A | #N/A | #N/A | #N/A | #N/A |
| rs10273639 | rs4726577  | 5745 | 0.965 | chr7:142462673 | #N/A | #N/A | #N/A | #N/A | #N/A | #N/A |
| rs34352134 | rs4823179  | 5777 | 1     | chr22:44341193 | #N/A | #N/A | #N/A | #N/A | #N/A | #N/A |
| rs4823179  | rs34352134 | 5777 | 1     | chr22:44335416 | #N/A | #N/A | #N/A | #N/A | #N/A | #N/A |
| rs35621602 | rs4823179  | 5787 | 1     | chr22:44341193 | #N/A | #N/A | #N/A | #N/A | #N/A | #N/A |
| rs12483959 | rs1883348  | 5819 | 0.843 | chr22:44331815 | #N/A | #N/A | #N/A | #N/A | #N/A | #N/A |
| rs16991175 | rs4823179  | 5862 | 0.947 | chr22:44341193 | #N/A | #N/A | #N/A | #N/A | #N/A | #N/A |
| rs2281292  | rs2235778  | 5875 | 0.902 | chr22:44389514 | #N/A | #N/A | #N/A | #N/A | #N/A | #N/A |
| rs4823180  | rs34352134 | 5882 | 1     | chr22:44335416 | #N/A | #N/A | #N/A | #N/A | #N/A | #N/A |
| rs6006469  | rs2235778  | 5897 | 0.902 | chr22:44389514 | #N/A | #N/A | #N/A | #N/A | #N/A | #N/A |
| rs2072906  | rs12484700 | 5899 | 0.843 | chr22:44327273 | #N/A | #N/A | #N/A | #N/A | #N/A | #N/A |
| rs1007863  | rs2235778  | 5937 | 0.902 | chr22:44389514 | #N/A | #N/A | #N/A | #N/A | #N/A | #N/A |
| rs4823182  | rs6006602  | 5958 | 0.872 | chr22:44383400 | #N/A | #N/A | #N/A | #N/A | #N/A | #N/A |
| rs1010023  | rs1977081  | 5970 | 0.843 | chr22:44330128 | #N/A | #N/A | #N/A | #N/A | #N/A | #N/A |
| rs1977081  | rs1010023  | 5970 | 0.843 | chr22:44336098 | #N/A | #N/A | #N/A | #N/A | #N/A | #N/A |
| rs2008451  | rs73176497 | 6012 | 1     | chr22:44336957 | #N/A | #N/A | #N/A | #N/A | #N/A | #N/A |
| rs73176497 | rs2008451  | 6012 | 1     | chr22:44342969 | #N/A | #N/A | #N/A | #N/A | #N/A | #N/A |
| rs13056555 | rs2072905  | 6047 | 1     | chr22:44333479 | #N/A | #N/A | #N/A | #N/A | #N/A | #N/A |
| rs2092501  | rs4823179  | 6058 | 0.947 | chr22:44341193 | #N/A | #N/A | #N/A | #N/A | #N/A | #N/A |
| rs6006468  | rs2235778  | 6082 | 0.902 | chr22:44389514 | #N/A | #N/A | #N/A | #N/A | #N/A | #N/A |
| rs2076207  | rs12484700 | 6097 | 0.843 | chr22:44327273 | #N/A | #N/A | #N/A | #N/A | #N/A | #N/A |
| rs2235778  | rs6006602  | 6114 | 0.902 | chr22:44383400 | #N/A | #N/A | #N/A | #N/A | #N/A | #N/A |
| rs6006602  | rs2235778  | 6114 | 0.902 | chr22:44389514 | #N/A | #N/A | #N/A | #N/A | #N/A | #N/A |
| rs35621602 | rs2294433  | 6131 | 0.843 | chr22:44329275 | #N/A | #N/A | #N/A | #N/A | #N/A | #N/A |
| rs2294433  | rs34352134 | 6141 | 0.843 | chr22:44335416 | #N/A | #N/A | #N/A | #N/A | #N/A | #N/A |
| rs34352134 | rs2294433  | 6141 | 0.843 | chr22:44329275 | #N/A | #N/A | #N/A | #N/A | #N/A | #N/A |
| rs10273639 | rs4726577  | 6153 | 0.932 | chr7:142463081 | #N/A | #N/A | #N/A | #N/A | #N/A | #N/A |
| rs11090617 | rs34879941 | 6178 | 0.843 | chr22:44332878 | #N/A | #N/A | #N/A | #N/A | #N/A | #N/A |
| rs1010022  | rs1977081  | 6182 | 0.843 | chr22:44330128 | #N/A | #N/A | #N/A | #N/A | #N/A | #N/A |
| rs4823181  | rs34352134 | 6190 | 1     | chr22:44335416 | #N/A | #N/A | #N/A | #N/A | #N/A | #N/A |
| rs12484700 | rs2072905  | 6206 | 0.843 | chr22:44333479 | #N/A | #N/A | #N/A | #N/A | #N/A | #N/A |
| rs2072905  | rs12484700 | 6206 | 0.843 | chr22:44327273 | #N/A | #N/A | #N/A | #N/A | #N/A | #N/A |
| rs13055900 | rs34352134 | 6250 | 1     | chr22:44335416 | #N/A | #N/A | #N/A | #N/A | #N/A | #N/A |
| rs13055874 | rs34352134 | 6256 | 1     | chr22:44335416 | #N/A | #N/A | #N/A | #N/A | #N/A | #N/A |
| rs1474745  | rs2008451  | 6267 | 0.947 | chr22:44342969 | #N/A | #N/A | #N/A | #N/A | #N/A | #N/A |
| rs3761472  | rs2294221  | 6280 | 1     | chr22:44361842 | #N/A | #N/A | #N/A | #N/A | #N/A | #N/A |
| rs36055245 | rs2072905  | 6287 | 0.843 | chr22:44333479 | #N/A | #N/A | #N/A | #N/A | #N/A | #N/A |
| rs35621602 | rs2076211  | 6328 | 0.843 | chr22:44329078 | #N/A | #N/A | #N/A | #N/A | #N/A | #N/A |
| rs2076211  | rs34352134 | 6338 | 0.843 | chr22:44335416 | #N/A | #N/A | #N/A | #N/A | #N/A | #N/A |
| rs34352134 | rs2076211  | 6338 | 0.843 | chr22:44329078 | #N/A | #N/A | #N/A | #N/A | #N/A | #N/A |
| rs10273639 | rs10258394 | 6379 | 1     | chr7:142463307 | #N/A | #N/A | #N/A | #N/A | #N/A | #N/A |
| rs2294916  | rs4823178  | 6393 | 0.891 | chr22:44334529 | #N/A | #N/A | #N/A | #N/A | #N/A | #N/A |
| rs2896019  | rs12484700 | 6421 | 0.843 | chr22:44327273 | #N/A | #N/A | #N/A | #N/A | #N/A | #N/A |
| rs2294916  | rs4823177  | 6436 | 0.891 | chr22:44334486 | #N/A | #N/A | #N/A | #N/A | #N/A | #N/A |
| rs2294916  | rs4823176  | 6446 | 0.891 | chr22:44334476 | #N/A | #N/A | #N/A | #N/A | #N/A | #N/A |
| rs2073081  | rs2294433  | 6469 | 0.843 | chr22:44329275 | #N/A | #N/A | #N/A | #N/A | #N/A | #N/A |
| rs9625962  | rs34879941 | 6606 | 0.843 | chr22:44332878 | #N/A | #N/A | #N/A | #N/A | #N/A | #N/A |
| rs36069781 | rs2072905  | 6607 | 1     | chr22:44333479 | #N/A | #N/A | #N/A | #N/A | #N/A | #N/A |
| rs13056555 | rs34879941 | 6648 | 1     | chr22:44332878 | #N/A | #N/A | #N/A | #N/A | #N/A | #N/A |
| rs1010022  | rs2008451  | 6659 | 1     | chr22:44342969 | #N/A | #N/A | #N/A | #N/A | #N/A | #N/A |
| rs4823178  | rs4823179  | 6664 | 0.947 | chr22:44341193 | #N/A | #N/A | #N/A | #N/A | #N/A | #N/A |
| rs4823179  | rs4823178  | 6664 | 0.947 | chr22:44334529 | #N/A | #N/A | #N/A | #N/A | #N/A | #N/A |
| rs2073081  | rs2076211  | 6666 | 0.843 | chr22:44329078 | #N/A | #N/A | #N/A | #N/A | #N/A | #N/A |
| rs2401512  | rs12484700 | 6672 | 0.843 | chr22:44327273 | #N/A | #N/A | #N/A | #N/A | #N/A | #N/A |
| rs35621602 | rs4823173  | 6676 | 0.843 | chr22:44328730 | #N/A | #N/A | #N/A | #N/A | #N/A | #N/A |
| rs34352134 | rs4823173  | 6686 | 0.843 | chr22:44328730 | #N/A | #N/A | #N/A | #N/A | #N/A | #N/A |
| rs4823173  | rs34352134 | 6686 | 0.843 | chr22:44335416 | #N/A | #N/A | #N/A | #N/A | #N/A | #N/A |
| rs2896020  | rs12484700 | 6695 | 0.843 | chr22:44327273 | #N/A | #N/A | #N/A | #N/A | #N/A | #N/A |
| rs4823177  | rs4823179  | 6707 | 0.947 | chr22:44341193 | #N/A | #N/A | #N/A | #N/A | #N/A | #N/A |
| rs4823179  | rs4823177  | 6707 | 0.947 | chr22:44334486 | #N/A | #N/A | #N/A | #N/A | #N/A | #N/A |
| rs4823176  | rs4823179  | 6717 | 0.947 | chr22:44341193 | #N/A | #N/A | #N/A | #N/A | #N/A | #N/A |
| rs4823179  | rs4823176  | 6717 | 0.947 | chr22:44334476 | #N/A | #N/A | #N/A | #N/A | #N/A | #N/A |
| rs4823180  | rs4823178  | 6769 | 0.947 | chr22:44334529 | #N/A | #N/A | #N/A | #N/A | #N/A | #N/A |
| rs11090617 | rs2072905  | 6779 | 0.843 | chr22:44333479 | #N/A | #N/A | #N/A | #N/A | #N/A | #N/A |
| rs4823180  | rs4823177  | 6812 | 0.947 | chr22:44334486 | #N/A | #N/A | #N/A | #N/A | #N/A | #N/A |
| rs4823180  | rs4823176  | 6822 | 0.947 | chr22:44334476 | #N/A | #N/A | #N/A | #N/A | #N/A | #N/A |
| rs1010023  | rs2294433  | 6823 | 0.843 | chr22:44329275 | #N/A | #N/A | #N/A | #N/A | #N/A | #N/A |
| rs2294433  | rs1010023  | 6823 | 0.843 | chr22:44336098 | #N/A | #N/A | #N/A | #N/A | #N/A | #N/A |
| rs1977081  | rs73176497 | 6829 | 0.843 | chr22:44336957 | #N/A | #N/A | #N/A | #N/A | #N/A | #N/A |
| rs73176497 | rs1977081  | 6829 | 0.843 | chr22:44330128 | #N/A | #N/A | #N/A | #N/A | #N/A | #N/A |
| rs1010023  | rs2008451  | 6871 | 1     | chr22:44342969 | #N/A | #N/A | #N/A | #N/A | #N/A | #N/A |
| rs2008451  | rs1010023  | 6871 | 1     | chr22:44336098 | #N/A | #N/A | #N/A | #N/A | #N/A | #N/A |
| rs12483959 | rs34879941 | 6882 | 0.843 | chr22:44332878 | #N/A | #N/A | #N/A | #N/A | #N/A | #N/A |
| rs10273639 | rs2855972  | 6993 | 0.966 | chr7:142463921 | #N/A | #N/A | #N/A | #N/A | #N/A | #N/A |
| rs2073081  | rs4823173  | 7014 | 0.843 | chr22:44328730 | #N/A | #N/A | #N/A | #N/A | #N/A | #N/A |
| rs1010023  | rs2076211  | 7020 | 0.843 | chr22:44329078 | #N/A | #N/A | #N/A | #N/A | #N/A | #N/A |
| rs2076211  | rs1010023  | 7020 | 0.843 | chr22:44336098 | #N/A | #N/A | #N/A | #N/A | #N/A | #N/A |
| rs1010022  | rs2294433  | 7035 | 0.843 | chr22:44329275 | #N/A | #N/A | #N/A | #N/A | #N/A | #N/A |
| rs67450864 | rs6006602  | 7065 | 0.872 | chr22:44383400 | #N/A | #N/A | #N/A | #N/A | #N/A | #N/A |
| rs4823181  | rs4823178  | 7077 | 0.947 | chr22:44334529 | #N/A | #N/A | #N/A | #N/A | #N/A | #N/A |
| rs4823181  | rs4823177  | 7120 | 0.947 | chr22:44334486 | #N/A | #N/A | #N/A | #N/A | #N/A | #N/A |
| rs4823181  | rs4823176  | 7130 | 0.947 | chr22:44334476 | #N/A | #N/A | #N/A | #N/A | #N/A | #N/A |
| rs13055900 | rs4823178  | 7137 | 0.947 | chr22:44334529 | #N/A | #N/A | #N/A | #N/A | #N/A | #N/A |
| rs13055874 | rs4823178  | 7143 | 0.947 | chr22:44334529 | #N/A | #N/A | #N/A | #N/A | #N/A | #N/A |
| rs13055900 | rs4823177  | 7180 | 0.947 | chr22:44334486 | #N/A | #N/A | #N/A | #N/A | #N/A | #N/A |
| rs13055874 | rs4823177  | 7186 | 0.947 | chr22:44334486 | #N/A | #N/A | #N/A | #N/A | #N/A | #N/A |
| rs13055900 | rs4823176  | 7190 | 0.947 | chr22:44334476 | #N/A | #N/A | #N/A | #N/A | #N/A | #N/A |
| rs13055874 | rs4823176  | 7196 | 0.947 | chr22:44334476 | #N/A | #N/A | #N/A | #N/A | #N/A | #N/A |
| rs9625962  | rs2072905  | 7207 | 0.843 | chr22:44333479 | #N/A | #N/A | #N/A | #N/A | #N/A | #N/A |
| rs36069781 | rs34879941 | 7208 | 1     | chr22:44332878 | #N/A | #N/A | #N/A | #N/A | #N/A | #N/A |
| rs2073081  | rs2008451  | 7225 | 1     | chr22:44342969 | #N/A | #N/A | #N/A | #N/A | #N/A | #N/A |
| rs2896020  | rs4823179  | 7225 | 1     | chr22:44341193 | #N/A | #N/A | #N/A | #N/A | #N/A | #N/A |
| rs1010022  | rs2076211  | 7232 | 0.843 | chr22:44329078 | #N/A | #N/A | #N/A | #N/A | #N/A | #N/A |
| rs1474745  | rs56373884 | 7232 | 0.945 | chr22:44356468 | #N/A | #N/A | #N/A | #N/A | #N/A | #N/A |
| rs2401512  | rs4823179  | 7248 | 1     | chr22:44341193 | #N/A | #N/A | #N/A | #N/A | #N/A | #N/A |
| rs34912062 | rs4823179  | 7253 | 0.947 | chr22:44341193 | #N/A | #N/A | #N/A | #N/A | #N/A | #N/A |
| rs1010023  | rs4823173  | 7368 | 0.843 | chr22:44328730 | #N/A | #N/A | #N/A | #N/A | #N/A | #N/A |
| rs4823173  | rs1010023  | 7368 | 0.843 | chr22:44336098 | #N/A | #N/A | #N/A | #N/A | #N/A | #N/A |
| rs926633   | rs1977081  | 7405 | 0.843 | chr22:44330128 | #N/A | #N/A | #N/A | #N/A | #N/A | #N/A |
| rs2294916  | rs2072905  | 7443 | 0.843 | chr22:44333479 | #N/A | #N/A | #N/A | #N/A | #N/A | #N/A |

|            |            |       |       |                |      |      |      |      |      |      |
|------------|------------|-------|-------|----------------|------|------|------|------|------|------|
| rs12483959 | rs2072905  | 7483  | 0.843 | chr22:44333479 | #N/A | #N/A | #N/A | #N/A | #N/A | #N/A |
| rs2896019  | rs4823179  | 7499  | 1     | chr22:44341193 | #N/A | #N/A | #N/A | #N/A | #N/A | #N/A |
| rs2008451  | rs34352134 | 7553  | 1     | chr22:44335416 | #N/A | #N/A | #N/A | #N/A | #N/A | #N/A |
| rs34352134 | rs2008451  | 7553  | 1     | chr22:44342969 | #N/A | #N/A | #N/A | #N/A | #N/A | #N/A |
| rs35621602 | rs2008451  | 7563  | 1     | chr22:44342969 | #N/A | #N/A | #N/A | #N/A | #N/A | #N/A |
| rs1010022  | rs4823173  | 7580  | 0.843 | chr22:44328730 | #N/A | #N/A | #N/A | #N/A | #N/A | #N/A |
| rs16991175 | rs2008451  | 7638  | 0.947 | chr22:44342969 | #N/A | #N/A | #N/A | #N/A | #N/A | #N/A |
| rs2294433  | rs73176497 | 7682  | 0.843 | chr22:44336957 | #N/A | #N/A | #N/A | #N/A | #N/A | #N/A |
| rs73176497 | rs2294433  | 7682  | 0.843 | chr22:44329275 | #N/A | #N/A | #N/A | #N/A | #N/A | #N/A |
| rs13056555 | rs1883348  | 7711  | 1     | chr22:44331815 | #N/A | #N/A | #N/A | #N/A | #N/A | #N/A |
| rs2072905  | rs4823179  | 7714  | 1     | chr22:44341193 | #N/A | #N/A | #N/A | #N/A | #N/A | #N/A |
| rs4823179  | rs2072905  | 7714  | 1     | chr22:44333479 | #N/A | #N/A | #N/A | #N/A | #N/A | #N/A |
| rs4823180  | rs2072905  | 7819  | 1     | chr22:44333479 | #N/A | #N/A | #N/A | #N/A | #N/A | #N/A |
| rs2076207  | rs4823179  | 7823  | 1     | chr22:44341193 | #N/A | #N/A | #N/A | #N/A | #N/A | #N/A |
| rs2076211  | rs73176497 | 7879  | 0.843 | chr22:44336957 | #N/A | #N/A | #N/A | #N/A | #N/A | #N/A |
| rs73176497 | rs2076211  | 7879  | 0.843 | chr22:44329078 | #N/A | #N/A | #N/A | #N/A | #N/A | #N/A |
| rs2072906  | rs4823179  | 8021  | 1     | chr22:44341193 | #N/A | #N/A | #N/A | #N/A | #N/A | #N/A |
| rs34912062 | rs56373884 | 8022  | 0.945 | chr22:44356468 | #N/A | #N/A | #N/A | #N/A | #N/A | #N/A |
| rs1474745  | rs4823179  | 8043  | 0.947 | chr22:44341193 | #N/A | #N/A | #N/A | #N/A | #N/A | #N/A |
| rs2294916  | rs34879941 | 8044  | 0.843 | chr22:44332878 | #N/A | #N/A | #N/A | #N/A | #N/A | #N/A |
| rs4823181  | rs2072905  | 8127  | 1     | chr22:44333479 | #N/A | #N/A | #N/A | #N/A | #N/A | #N/A |
| rs35621602 | rs12484700 | 8133  | 0.843 | chr22:44327273 | #N/A | #N/A | #N/A | #N/A | #N/A | #N/A |
| rs12484700 | rs34352134 | 8143  | 0.843 | chr22:44335416 | #N/A | #N/A | #N/A | #N/A | #N/A | #N/A |
| rs34352134 | rs12484700 | 8143  | 0.843 | chr22:44327273 | #N/A | #N/A | #N/A | #N/A | #N/A | #N/A |
| rs13055900 | rs2072905  | 8187  | 1     | chr22:44333479 | #N/A | #N/A | #N/A | #N/A | #N/A | #N/A |
| rs13055874 | rs2072905  | 8193  | 1     | chr22:44333479 | #N/A | #N/A | #N/A | #N/A | #N/A | #N/A |
| rs36055245 | rs34352134 | 8224  | 0.843 | chr22:44335416 | #N/A | #N/A | #N/A | #N/A | #N/A | #N/A |
| rs4823173  | rs73176497 | 8227  | 0.843 | chr22:44336957 | #N/A | #N/A | #N/A | #N/A | #N/A | #N/A |
| rs73176497 | rs4823173  | 8227  | 0.843 | chr22:44328730 | #N/A | #N/A | #N/A | #N/A | #N/A | #N/A |
| rs926633   | rs2294433  | 8258  | 0.843 | chr22:44329275 | #N/A | #N/A | #N/A | #N/A | #N/A | #N/A |
| rs36069781 | rs1883348  | 8271  | 1     | chr22:44331815 | #N/A | #N/A | #N/A | #N/A | #N/A | #N/A |
| rs34879941 | rs4823179  | 8315  | 1     | chr22:44341193 | #N/A | #N/A | #N/A | #N/A | #N/A | #N/A |
| rs4823179  | rs34879941 | 8315  | 1     | chr22:44332878 | #N/A | #N/A | #N/A | #N/A | #N/A | #N/A |
| rs4823180  | rs34879941 | 8420  | 1     | chr22:44332878 | #N/A | #N/A | #N/A | #N/A | #N/A | #N/A |
| rs2008451  | rs4823178  | 8440  | 0.947 | chr22:44334529 | #N/A | #N/A | #N/A | #N/A | #N/A | #N/A |
| rs4823178  | rs2008451  | 8440  | 0.947 | chr22:44342969 | #N/A | #N/A | #N/A | #N/A | #N/A | #N/A |
| rs926633   | rs2076211  | 8455  | 0.843 | chr22:44329078 | #N/A | #N/A | #N/A | #N/A | #N/A | #N/A |
| rs2073081  | rs12484700 | 8471  | 0.843 | chr22:44327273 | #N/A | #N/A | #N/A | #N/A | #N/A | #N/A |
| rs2008451  | rs4823177  | 8483  | 0.947 | chr22:44334486 | #N/A | #N/A | #N/A | #N/A | #N/A | #N/A |
| rs4823177  | rs2008451  | 8483  | 0.947 | chr22:44342969 | #N/A | #N/A | #N/A | #N/A | #N/A | #N/A |
| rs2008451  | rs4823176  | 8493  | 0.947 | chr22:44334476 | #N/A | #N/A | #N/A | #N/A | #N/A | #N/A |
| rs4823176  | rs2008451  | 8493  | 0.947 | chr22:44342969 | #N/A | #N/A | #N/A | #N/A | #N/A | #N/A |
| rs2072907  | rs4823179  | 8540  | 1     | chr22:44341193 | #N/A | #N/A | #N/A | #N/A | #N/A | #N/A |
| rs2281135  | rs4823179  | 8623  | 1     | chr22:44341193 | #N/A | #N/A | #N/A | #N/A | #N/A | #N/A |
| rs2281137  | rs4823179  | 8700  | 0.895 | chr22:44341193 | #N/A | #N/A | #N/A | #N/A | #N/A | #N/A |
| rs11090617 | rs34352134 | 8716  | 0.843 | chr22:44335416 | #N/A | #N/A | #N/A | #N/A | #N/A | #N/A |
| rs2281138  | rs4823179  | 8716  | 1     | chr22:44341193 | #N/A | #N/A | #N/A | #N/A | #N/A | #N/A |
| rs4823181  | rs34879941 | 8728  | 1     | chr22:44332878 | #N/A | #N/A | #N/A | #N/A | #N/A | #N/A |
| rs13055900 | rs34879941 | 8788  | 1     | chr22:44332878 | #N/A | #N/A | #N/A | #N/A | #N/A | #N/A |
| rs13055874 | rs34879941 | 8794  | 1     | chr22:44332878 | #N/A | #N/A | #N/A | #N/A | #N/A | #N/A |
| rs926633   | rs4823173  | 8803  | 0.843 | chr22:44328730 | #N/A | #N/A | #N/A | #N/A | #N/A | #N/A |
| rs1010023  | rs12484700 | 8825  | 0.843 | chr22:44327273 | #N/A | #N/A | #N/A | #N/A | #N/A | #N/A |
| rs12484700 | rs1010023  | 8825  | 0.843 | chr22:44336098 | #N/A | #N/A | #N/A | #N/A | #N/A | #N/A |
| rs36055245 | rs1010023  | 8906  | 0.843 | chr22:44336098 | #N/A | #N/A | #N/A | #N/A | #N/A | #N/A |
| rs58542926 | rs8107974  | 8951  | 0.803 | chr19:19388500 | #N/A | #N/A | #N/A | #N/A | #N/A | #N/A |
| rs2896020  | rs2008451  | 9001  | 1     | chr22:44342969 | #N/A | #N/A | #N/A | #N/A | #N/A | #N/A |
| rs2401512  | rs2008451  | 9024  | 1     | chr22:44342969 | #N/A | #N/A | #N/A | #N/A | #N/A | #N/A |
| rs1010022  | rs12484700 | 9037  | 0.843 | chr22:44327273 | #N/A | #N/A | #N/A | #N/A | #N/A | #N/A |
| rs2294916  | rs1883348  | 9107  | 0.843 | chr22:44331815 | #N/A | #N/A | #N/A | #N/A | #N/A | #N/A |
| rs9625962  | rs34352134 | 9144  | 0.843 | chr22:44335416 | #N/A | #N/A | #N/A | #N/A | #N/A | #N/A |
| rs2092501  | rs56373884 | 9217  | 0.945 | chr22:44356468 | #N/A | #N/A | #N/A | #N/A | #N/A | #N/A |
| rs1883349  | rs4823179  | 9250  | 1     | chr22:44341193 | #N/A | #N/A | #N/A | #N/A | #N/A | #N/A |
| rs2896019  | rs2008451  | 9275  | 1     | chr22:44342969 | #N/A | #N/A | #N/A | #N/A | #N/A | #N/A |
| rs10273639 | rs1964987  | 9283  | 0.896 | chr7:142447636 | #N/A | #N/A | #N/A | #N/A | #N/A | #N/A |
| rs10273639 | rs1964986  | 9288  | 0.896 | chr7:142447631 | #N/A | #N/A | #N/A | #N/A | #N/A | #N/A |
| rs1883348  | rs4823179  | 9378  | 1     | chr22:44341193 | #N/A | #N/A | #N/A | #N/A | #N/A | #N/A |
| rs4823179  | rs1883348  | 9378  | 1     | chr22:44331815 | #N/A | #N/A | #N/A | #N/A | #N/A | #N/A |
| rs11090617 | rs1010023  | 9398  | 0.843 | chr22:44336098 | #N/A | #N/A | #N/A | #N/A | #N/A | #N/A |
| rs13056555 | rs1977081  | 9398  | 0.843 | chr22:44330128 | #N/A | #N/A | #N/A | #N/A | #N/A | #N/A |
| rs13056638 | rs4823179  | 9415  | 1     | chr22:44341193 | #N/A | #N/A | #N/A | #N/A | #N/A | #N/A |
| rs12483959 | rs34352134 | 9420  | 0.843 | chr22:44335416 | #N/A | #N/A | #N/A | #N/A | #N/A | #N/A |
| rs4823180  | rs1883348  | 9483  | 1     | chr22:44331815 | #N/A | #N/A | #N/A | #N/A | #N/A | #N/A |
| rs2008451  | rs2072905  | 9490  | 1     | chr22:44333479 | #N/A | #N/A | #N/A | #N/A | #N/A | #N/A |
| rs2072905  | rs2008451  | 9490  | 1     | chr22:44342969 | #N/A | #N/A | #N/A | #N/A | #N/A | #N/A |
| rs61473277 | rs2294921  | 9564  | 0.887 | chr22:44361842 | #N/A | #N/A | #N/A | #N/A | #N/A | #N/A |
| rs2076207  | rs2008451  | 9599  | 1     | chr22:44342969 | #N/A | #N/A | #N/A | #N/A | #N/A | #N/A |
| rs10273639 | rs10081173 | 9605  | 0.896 | chr7:142447313 | #N/A | #N/A | #N/A | #N/A | #N/A | #N/A |
| rs6006473  | rs6006602  | 9675  | 1     | chr22:44383400 | #N/A | #N/A | #N/A | #N/A | #N/A | #N/A |
| rs1997693  | rs4823179  | 9680  | 1     | chr22:44341193 | #N/A | #N/A | #N/A | #N/A | #N/A | #N/A |
| rs12484700 | rs73176497 | 9684  | 0.843 | chr22:44336957 | #N/A | #N/A | #N/A | #N/A | #N/A | #N/A |
| rs73176497 | rs12484700 | 9684  | 0.843 | chr22:44327273 | #N/A | #N/A | #N/A | #N/A | #N/A | #N/A |
| rs36055245 | rs73176497 | 9765  | 0.843 | chr22:44336957 | #N/A | #N/A | #N/A | #N/A | #N/A | #N/A |
| rs4823181  | rs1883348  | 9791  | 1     | chr22:44331815 | #N/A | #N/A | #N/A | #N/A | #N/A | #N/A |
| rs2072906  | rs2008451  | 9797  | 1     | chr22:44342969 | #N/A | #N/A | #N/A | #N/A | #N/A | #N/A |
| rs9625962  | rs1010023  | 9826  | 0.843 | chr22:44336098 | #N/A | #N/A | #N/A | #N/A | #N/A | #N/A |
| rs13055900 | rs1883348  | 9851  | 1     | chr22:44331815 | #N/A | #N/A | #N/A | #N/A | #N/A | #N/A |
| rs13055874 | rs1883348  | 9857  | 1     | chr22:44331815 | #N/A | #N/A | #N/A | #N/A | #N/A | #N/A |
| rs61473277 | rs4823108  | 9934  | 1     | chr22:44381340 | #N/A | #N/A | #N/A | #N/A | #N/A | #N/A |
| rs36069781 | rs1977081  | 9958  | 0.843 | chr22:44330128 | #N/A | #N/A | #N/A | #N/A | #N/A | #N/A |
| rs61473277 | rs4823109  | 10076 | 1     | chr22:44381482 | #N/A | #N/A | #N/A | #N/A | #N/A | #N/A |
| rs2008451  | rs34879941 | 10091 | 1     | chr22:44332878 | #N/A | #N/A | #N/A | #N/A | #N/A | #N/A |
| rs34879941 | rs2008451  | 10091 | 1     | chr22:44342969 | #N/A | #N/A | #N/A | #N/A | #N/A | #N/A |
| rs12483959 | rs1010023  | 10102 | 0.843 | chr22:44336098 | #N/A | #N/A | #N/A | #N/A | #N/A | #N/A |
| rs13056555 | rs2294433  | 10251 | 0.843 | chr22:44329275 | #N/A | #N/A | #N/A | #N/A | #N/A | #N/A |
| rs11090617 | rs73176497 | 10257 | 0.843 | chr22:44336957 | #N/A | #N/A | #N/A | #N/A | #N/A | #N/A |
| rs926633   | rs12484700 | 10260 | 0.843 | chr22:44327273 | #N/A | #N/A | #N/A | #N/A | #N/A | #N/A |
| rs10273639 | rs13230029 | 10292 | 0.933 | chr7:142467216 | #N/A | #N/A | #N/A | #N/A | #N/A | #N/A |
| rs2092501  | rs73176497 | 10294 | 0.947 | chr22:44336957 | #N/A | #N/A | #N/A | #N/A | #N/A | #N/A |
| rs2072907  | rs2008451  | 10316 | 1     | chr22:44342969 | #N/A | #N/A | #N/A | #N/A | #N/A | #N/A |
| rs2281135  | rs2008451  | 10399 | 1     | chr22:44342969 | #N/A | #N/A | #N/A | #N/A | #N/A | #N/A |
| rs13056555 | rs2076211  | 10448 | 0.843 | chr22:44329078 | #N/A | #N/A | #N/A | #N/A | #N/A | #N/A |
| rs10273639 | rs10282054 | 10466 | 0.863 | chr7:142446452 | #N/A | #N/A | #N/A | #N/A | #N/A | #N/A |
| rs2281137  | rs2008451  | 10476 | 0.895 | chr22:44342969 | #N/A | #N/A | #N/A | #N/A | #N/A | #N/A |
| rs2281138  | rs2008451  | 10492 | 1     | chr22:44342969 | #N/A | #N/A | #N/A | #N/A | #N/A | #N/A |
| rs9625962  | rs73176497 | 10685 | 0.843 | chr22:44336957 | #N/A | #N/A | #N/A | #N/A | #N/A | #N/A |
| rs13056555 | rs4823173  | 10796 | 0.843 | chr22:44328730 | #N/A | #N/A | #N/A | #N/A | #N/A | #N/A |
| rs36069781 | rs2294433  | 10811 | 0.843 | chr22:44329275 | #N/A | #N/A | #N/A | #N/A | #N/A | #N/A |

|            |            |       |       |                |      |      |      |      |      |      |
|------------|------------|-------|-------|----------------|------|------|------|------|------|------|
| rs12483959 | rs73176497 | 10961 | 0.843 | chr22:44336957 | #N/A | #N/A | #N/A | #N/A | #N/A | #N/A |
| rs36069781 | rs2076211  | 11008 | 0.843 | chr22:44329078 | #N/A | #N/A | #N/A | #N/A | #N/A | #N/A |
| rs1883349  | rs2008451  | 11026 | 1     | chr22:44342969 | #N/A | #N/A | #N/A | #N/A | #N/A | #N/A |
| rs1977081  | rs4823179  | 11065 | 0.843 | chr22:44341193 | #N/A | #N/A | #N/A | #N/A | #N/A | #N/A |
| rs4823179  | rs1977081  | 11065 | 0.843 | chr22:44330128 | #N/A | #N/A | #N/A | #N/A | #N/A | #N/A |
| rs2092501  | rs1010023  | 11153 | 0.947 | chr22:44336098 | #N/A | #N/A | #N/A | #N/A | #N/A | #N/A |
| rs1883348  | rs2008451  | 11154 | 1     | chr22:44342969 | #N/A | #N/A | #N/A | #N/A | #N/A | #N/A |
| rs2008451  | rs1883348  | 11154 | 1     | chr22:44331815 | #N/A | #N/A | #N/A | #N/A | #N/A | #N/A |
| rs4823180  | rs1977081  | 11170 | 0.843 | chr22:44330128 | #N/A | #N/A | #N/A | #N/A | #N/A | #N/A |
| rs13056638 | rs2008451  | 11191 | 1     | chr22:44342969 | #N/A | #N/A | #N/A | #N/A | #N/A | #N/A |
| rs10401969 | rs739846   | 11353 | 1     | chr19:19419071 | #N/A | #N/A | #N/A | #N/A | #N/A | #N/A |
| rs36069781 | rs4823173  | 11356 | 0.843 | chr22:44328730 | #N/A | #N/A | #N/A | #N/A | #N/A | #N/A |
| rs1997693  | rs2008451  | 11456 | 1     | chr22:44342969 | #N/A | #N/A | #N/A | #N/A | #N/A | #N/A |
| rs4823181  | rs1977081  | 11478 | 0.843 | chr22:44330128 | #N/A | #N/A | #N/A | #N/A | #N/A | #N/A |
| rs34912062 | rs73176497 | 11489 | 0.947 | chr22:44336957 | #N/A | #N/A | #N/A | #N/A | #N/A | #N/A |
| rs13055900 | rs1977081  | 11538 | 0.843 | chr22:44330128 | #N/A | #N/A | #N/A | #N/A | #N/A | #N/A |
| rs13055874 | rs1977081  | 11544 | 0.843 | chr22:44330128 | #N/A | #N/A | #N/A | #N/A | #N/A | #N/A |
| rs3761472  | rs56373884 | 11654 | 1     | chr22:44356468 | #N/A | #N/A | #N/A | #N/A | #N/A | #N/A |
| rs2092501  | rs34352134 | 11835 | 0.947 | chr22:44335416 | #N/A | #N/A | #N/A | #N/A | #N/A | #N/A |
| rs2294433  | rs4823179  | 11918 | 0.843 | chr22:44341193 | #N/A | #N/A | #N/A | #N/A | #N/A | #N/A |
| rs4823179  | rs2294433  | 11918 | 0.843 | chr22:44329275 | #N/A | #N/A | #N/A | #N/A | #N/A | #N/A |
| rs2281292  | rs6006602  | 11989 | 1     | chr22:44383400 | #N/A | #N/A | #N/A | #N/A | #N/A | #N/A |
| rs4823180  | rs2294433  | 12023 | 0.843 | chr22:44329275 | #N/A | #N/A | #N/A | #N/A | #N/A | #N/A |
| rs1007863  | rs6006602  | 12051 | 1     | chr22:44383400 | #N/A | #N/A | #N/A | #N/A | #N/A | #N/A |
| rs2076211  | rs4823179  | 12115 | 0.843 | chr22:44341193 | #N/A | #N/A | #N/A | #N/A | #N/A | #N/A |
| rs4823179  | rs2076211  | 12115 | 0.843 | chr22:44329078 | #N/A | #N/A | #N/A | #N/A | #N/A | #N/A |
| rs4823180  | rs2076211  | 12220 | 0.843 | chr22:44329078 | #N/A | #N/A | #N/A | #N/A | #N/A | #N/A |
| rs13056555 | rs12484700 | 12253 | 0.843 | chr22:44327273 | #N/A | #N/A | #N/A | #N/A | #N/A | #N/A |
| rs1474745  | rs73176497 | 12279 | 0.947 | chr22:44336957 | #N/A | #N/A | #N/A | #N/A | #N/A | #N/A |
| rs4823181  | rs2294433  | 12331 | 0.843 | chr22:44329275 | #N/A | #N/A | #N/A | #N/A | #N/A | #N/A |
| rs34912062 | rs1010023  | 12348 | 0.947 | chr22:44336098 | #N/A | #N/A | #N/A | #N/A | #N/A | #N/A |
| rs13055900 | rs2294433  | 12391 | 0.843 | chr22:44329275 | #N/A | #N/A | #N/A | #N/A | #N/A | #N/A |
| rs13055874 | rs2294433  | 12397 | 0.843 | chr22:44329275 | #N/A | #N/A | #N/A | #N/A | #N/A | #N/A |
| rs10273639 | rs11765409 | 12416 | 0.933 | chr7:142469347 | #N/A | #N/A | #N/A | #N/A | #N/A | #N/A |
| rs4823173  | rs4823179  | 12463 | 0.843 | chr22:44341193 | #N/A | #N/A | #N/A | #N/A | #N/A | #N/A |
| rs4823179  | rs4823173  | 12463 | 0.843 | chr22:44328730 | #N/A | #N/A | #N/A | #N/A | #N/A | #N/A |
| rs4823181  | rs2076211  | 12528 | 0.843 | chr22:44329078 | #N/A | #N/A | #N/A | #N/A | #N/A | #N/A |
| rs4823180  | rs4823173  | 12568 | 0.843 | chr22:44328730 | #N/A | #N/A | #N/A | #N/A | #N/A | #N/A |
| rs13055900 | rs2076211  | 12588 | 0.843 | chr22:44329078 | #N/A | #N/A | #N/A | #N/A | #N/A | #N/A |
| rs13055874 | rs2076211  | 12594 | 0.843 | chr22:44329078 | #N/A | #N/A | #N/A | #N/A | #N/A | #N/A |
| rs1474745  | rs2294921  | 12606 | 0.945 | chr22:44361842 | #N/A | #N/A | #N/A | #N/A | #N/A | #N/A |
| rs2092501  | rs4823178  | 12722 | 0.891 | chr22:44334529 | #N/A | #N/A | #N/A | #N/A | #N/A | #N/A |
| rs2092501  | rs4823177  | 12765 | 0.891 | chr22:44334486 | #N/A | #N/A | #N/A | #N/A | #N/A | #N/A |
| rs2092501  | rs4823176  | 12775 | 0.891 | chr22:44334476 | #N/A | #N/A | #N/A | #N/A | #N/A | #N/A |
| rs36069781 | rs12484700 | 12813 | 0.843 | chr22:44327273 | #N/A | #N/A | #N/A | #N/A | #N/A | #N/A |
| rs1977081  | rs2008451  | 12841 | 0.843 | chr22:44342969 | #N/A | #N/A | #N/A | #N/A | #N/A | #N/A |
| rs2008451  | rs1977081  | 12841 | 0.843 | chr22:44330128 | #N/A | #N/A | #N/A | #N/A | #N/A | #N/A |
| rs4823181  | rs4823173  | 12876 | 0.843 | chr22:44328730 | #N/A | #N/A | #N/A | #N/A | #N/A | #N/A |
| rs58542926 | rs72999033 | 12917 | 0.881 | chr19:19366632 | #N/A | #N/A | #N/A | #N/A | #N/A | #N/A |
| rs13055900 | rs4823173  | 12936 | 0.843 | chr22:44328730 | #N/A | #N/A | #N/A | #N/A | #N/A | #N/A |
| rs13055874 | rs4823173  | 12942 | 0.843 | chr22:44328730 | #N/A | #N/A | #N/A | #N/A | #N/A | #N/A |
| rs10273639 | rs12534573 | 13010 | 0.933 | chr7:142469937 | #N/A | #N/A | #N/A | #N/A | #N/A | #N/A |
| rs10273639 | rs12534595 | 13015 | 0.933 | chr7:142469942 | #N/A | #N/A | #N/A | #N/A | #N/A | #N/A |
| rs34912062 | rs34352134 | 13030 | 0.947 | chr22:44335416 | #N/A | #N/A | #N/A | #N/A | #N/A | #N/A |
| rs1474745  | rs1010023  | 13138 | 0.947 | chr22:44336098 | #N/A | #N/A | #N/A | #N/A | #N/A | #N/A |
| rs3761472  | rs4823108  | 13218 | 0.887 | chr22:44381340 | #N/A | #N/A | #N/A | #N/A | #N/A | #N/A |
| rs3761472  | rs4823109  | 13360 | 0.887 | chr22:44381482 | #N/A | #N/A | #N/A | #N/A | #N/A | #N/A |
| rs10273639 | rs11769872 | 13363 | 0.933 | chr7:142470290 | #N/A | #N/A | #N/A | #N/A | #N/A | #N/A |
| rs34912062 | rs2294921  | 13396 | 0.945 | chr22:44361842 | #N/A | #N/A | #N/A | #N/A | #N/A | #N/A |
| rs10273639 | rs11770572 | 13437 | 0.901 | chr7:142470364 | #N/A | #N/A | #N/A | #N/A | #N/A | #N/A |
| rs2008451  | rs56373884 | 13499 | 0.895 | chr22:44356468 | #N/A | #N/A | #N/A | #N/A | #N/A | #N/A |
| rs56373884 | rs2008451  | 13499 | 0.895 | chr22:44342969 | #N/A | #N/A | #N/A | #N/A | #N/A | #N/A |
| rs10273639 | rs3752404  | 13647 | 0.933 | chr7:142470574 | #N/A | #N/A | #N/A | #N/A | #N/A | #N/A |
| rs2008451  | rs2294433  | 13694 | 0.843 | chr22:44329275 | #N/A | #N/A | #N/A | #N/A | #N/A | #N/A |
| rs2294433  | rs2008451  | 13694 | 0.843 | chr22:44342969 | #N/A | #N/A | #N/A | #N/A | #N/A | #N/A |
| rs10273639 | rs10952531 | 13764 | 0.933 | chr7:142470691 | #N/A | #N/A | #N/A | #N/A | #N/A | #N/A |
| rs2092501  | rs2072905  | 13772 | 0.947 | chr22:44333479 | #N/A | #N/A | #N/A | #N/A | #N/A | #N/A |
| rs1474745  | rs34352134 | 13820 | 0.947 | chr22:44335416 | #N/A | #N/A | #N/A | #N/A | #N/A | #N/A |
| rs2008451  | rs2076211  | 13891 | 0.843 | chr22:44329078 | #N/A | #N/A | #N/A | #N/A | #N/A | #N/A |
| rs2076211  | rs2008451  | 13891 | 0.843 | chr22:44342969 | #N/A | #N/A | #N/A | #N/A | #N/A | #N/A |
| rs34912062 | rs4823178  | 13917 | 0.891 | chr22:44334529 | #N/A | #N/A | #N/A | #N/A | #N/A | #N/A |
| rs12484700 | rs4823179  | 13920 | 0.843 | chr22:44341193 | #N/A | #N/A | #N/A | #N/A | #N/A | #N/A |
| rs4823179  | rs12484700 | 13920 | 0.843 | chr22:44327273 | #N/A | #N/A | #N/A | #N/A | #N/A | #N/A |
| rs34912062 | rs4823177  | 13960 | 0.891 | chr22:44334486 | #N/A | #N/A | #N/A | #N/A | #N/A | #N/A |
| rs34912062 | rs4823176  | 13970 | 0.891 | chr22:44334476 | #N/A | #N/A | #N/A | #N/A | #N/A | #N/A |
| rs36055245 | rs4823179  | 14001 | 0.843 | chr22:44341193 | #N/A | #N/A | #N/A | #N/A | #N/A | #N/A |
| rs4823180  | rs12484700 | 14025 | 0.843 | chr22:44327273 | #N/A | #N/A | #N/A | #N/A | #N/A | #N/A |
| rs2008451  | rs4823173  | 14239 | 0.843 | chr22:44328730 | #N/A | #N/A | #N/A | #N/A | #N/A | #N/A |
| rs4823173  | rs2008451  | 14239 | 0.843 | chr22:44342969 | #N/A | #N/A | #N/A | #N/A | #N/A | #N/A |
| rs4823181  | rs12484700 | 14333 | 0.843 | chr22:44327273 | #N/A | #N/A | #N/A | #N/A | #N/A | #N/A |
| rs2092501  | rs34879941 | 14373 | 0.947 | chr22:44332878 | #N/A | #N/A | #N/A | #N/A | #N/A | #N/A |
| rs13055900 | rs12484700 | 14393 | 0.843 | chr22:44327273 | #N/A | #N/A | #N/A | #N/A | #N/A | #N/A |
| rs13055874 | rs12484700 | 14399 | 0.843 | chr22:44327273 | #N/A | #N/A | #N/A | #N/A | #N/A | #N/A |
| rs10273639 | rs56225909 | 14417 | 0.933 | chr7:142471344 | #N/A | #N/A | #N/A | #N/A | #N/A | #N/A |
| rs1109617  | rs4823179  | 14493 | 0.843 | chr22:44341193 | #N/A | #N/A | #N/A | #N/A | #N/A | #N/A |
| rs2092501  | rs2294921  | 14591 | 0.945 | chr22:44361842 | #N/A | #N/A | #N/A | #N/A | #N/A | #N/A |
| rs1474745  | rs4823178  | 14707 | 0.891 | chr22:44334529 | #N/A | #N/A | #N/A | #N/A | #N/A | #N/A |
| rs1474745  | rs4823177  | 14750 | 0.891 | chr22:44334486 | #N/A | #N/A | #N/A | #N/A | #N/A | #N/A |
| rs1474745  | rs4823176  | 14760 | 0.891 | chr22:44334476 | #N/A | #N/A | #N/A | #N/A | #N/A | #N/A |
| rs13055874 | rs56373884 | 14796 | 0.895 | chr22:44356468 | #N/A | #N/A | #N/A | #N/A | #N/A | #N/A |
| rs13055900 | rs56373884 | 14802 | 0.895 | chr22:44356468 | #N/A | #N/A | #N/A | #N/A | #N/A | #N/A |
| rs4823181  | rs56373884 | 14862 | 0.895 | chr22:44356468 | #N/A | #N/A | #N/A | #N/A | #N/A | #N/A |
| rs9625962  | rs4823179  | 14921 | 0.843 | chr22:44341193 | #N/A | #N/A | #N/A | #N/A | #N/A | #N/A |
| rs61473277 | rs56373884 | 14938 | 0.887 | chr22:44356468 | #N/A | #N/A | #N/A | #N/A | #N/A | #N/A |
| rs34912062 | rs2072905  | 14967 | 0.947 | chr22:44333479 | #N/A | #N/A | #N/A | #N/A | #N/A | #N/A |
| rs4823180  | rs56373884 | 15170 | 0.895 | chr22:44356468 | #N/A | #N/A | #N/A | #N/A | #N/A | #N/A |
| rs12483959 | rs4823179  | 15197 | 0.843 | chr22:44341193 | #N/A | #N/A | #N/A | #N/A | #N/A | #N/A |
| rs4823179  | rs56373884 | 15275 | 0.895 | chr22:44356468 | #N/A | #N/A | #N/A | #N/A | #N/A | #N/A |
| rs56373884 | rs4823179  | 15275 | 0.895 | chr22:44341193 | #N/A | #N/A | #N/A | #N/A | #N/A | #N/A |
| rs2092501  | rs1883348  | 15436 | 0.947 | chr22:44331815 | #N/A | #N/A | #N/A | #N/A | #N/A | #N/A |
| rs10273639 | rs4726581  | 15512 | 0.871 | chr7:142472439 | #N/A | #N/A | #N/A | #N/A | #N/A | #N/A |
| rs2294916  | rs56373884 | 15546 | 0.83  | chr22:44356468 | #N/A | #N/A | #N/A | #N/A | #N/A | #N/A |
| rs34912062 | rs34879941 | 15568 | 0.947 | chr22:44332878 | #N/A | #N/A | #N/A | #N/A | #N/A | #N/A |
| rs12484700 | rs2008451  | 15696 | 0.843 | chr22:44342969 | #N/A | #N/A | #N/A | #N/A | #N/A | #N/A |
| rs2008451  | rs12484700 | 15696 | 0.843 | chr22:44327273 | #N/A | #N/A | #N/A | #N/A | #N/A | #N/A |
| rs1474745  | rs2072905  | 15757 | 0.947 | chr22:44333479 | #N/A | #N/A | #N/A | #N/A | #N/A | #N/A |
| rs36055245 | rs2008451  | 15777 | 0.843 | chr22:44342969 | #N/A | #N/A | #N/A | #N/A | #N/A | #N/A |

|            |            |       |       |                |      |      |      |      |      |      |
|------------|------------|-------|-------|----------------|------|------|------|------|------|------|
| rs2235776  | rs2294921  | 16157 | 0.887 | chr22:44361842 | #N/A | #N/A | #N/A | #N/A | #N/A | #N/A |
| rs10273639 | rs34500324 | 16169 | 0.901 | chr7:142473096 | #N/A | #N/A | #N/A | #N/A | #N/A | #N/A |
| rs2294915  | rs738408   | 16174 | 0.869 | chr22:44324730 | #N/A | #N/A | #N/A | #N/A | #N/A | #N/A |
| rs10273639 | rs4726587  | 16192 | 0.933 | chr7:142473119 | #N/A | #N/A | #N/A | #N/A | #N/A | #N/A |
| rs11090617 | rs2008451  | 16269 | 0.843 | chr22:44342969 | #N/A | #N/A | #N/A | #N/A | #N/A | #N/A |
| rs1474745  | rs34879941 | 16358 | 0.947 | chr22:44332878 | #N/A | #N/A | #N/A | #N/A | #N/A | #N/A |
| rs36069781 | rs56373884 | 16382 | 0.895 | chr22:44356468 | #N/A | #N/A | #N/A | #N/A | #N/A | #N/A |
| rs10273639 | rs13229701 | 16537 | 0.933 | chr7:142473464 | #N/A | #N/A | #N/A | #N/A | #N/A | #N/A |
| rs34912062 | rs1883348  | 16631 | 0.947 | chr22:44331815 | #N/A | #N/A | #N/A | #N/A | #N/A | #N/A |
| rs9625962  | rs2008451  | 16697 | 0.843 | chr22:44342969 | #N/A | #N/A | #N/A | #N/A | #N/A | #N/A |
| rs13056555 | rs56373884 | 16942 | 0.895 | chr22:44356468 | #N/A | #N/A | #N/A | #N/A | #N/A | #N/A |
| rs2235777  | rs2294921  | 16967 | 0.887 | chr22:44361842 | #N/A | #N/A | #N/A | #N/A | #N/A | #N/A |
| rs12483959 | rs2008451  | 16973 | 0.843 | chr22:44342969 | #N/A | #N/A | #N/A | #N/A | #N/A | #N/A |
| rs10273639 | rs2367484  | 17025 | 0.933 | chr7:142473952 | #N/A | #N/A | #N/A | #N/A | #N/A | #N/A |
| rs10273639 | rs2886990  | 17056 | 0.933 | chr7:142473983 | #N/A | #N/A | #N/A | #N/A | #N/A | #N/A |
| rs1474745  | rs1883348  | 17421 | 0.947 | chr22:44331815 | #N/A | #N/A | #N/A | #N/A | #N/A | #N/A |
| rs2294923  | rs2294921  | 17898 | 0.887 | chr22:44361842 | #N/A | #N/A | #N/A | #N/A | #N/A | #N/A |
| rs9626079  | rs2294921  | 18167 | 0.887 | chr22:44361842 | #N/A | #N/A | #N/A | #N/A | #N/A | #N/A |
| rs2008451  | rs2294921  | 18873 | 0.895 | chr22:44361842 | #N/A | #N/A | #N/A | #N/A | #N/A | #N/A |
| rs2294921  | rs2008451  | 18873 | 0.895 | chr22:44342969 | #N/A | #N/A | #N/A | #N/A | #N/A | #N/A |
| rs926633   | rs56373884 | 18935 | 0.895 | chr22:44356468 | #N/A | #N/A | #N/A | #N/A | #N/A | #N/A |
| rs10401969 | rs8107974  | 19218 | 1     | chr19:19388500 | #N/A | #N/A | #N/A | #N/A | #N/A | #N/A |
| rs2294921  | rs4823108  | 19498 | 0.887 | chr22:44381340 | #N/A | #N/A | #N/A | #N/A | #N/A | #N/A |
| rs4823108  | rs2294921  | 19498 | 0.887 | chr22:44361842 | #N/A | #N/A | #N/A | #N/A | #N/A | #N/A |
| rs56373884 | rs73176497 | 19511 | 0.895 | chr22:44336957 | #N/A | #N/A | #N/A | #N/A | #N/A | #N/A |
| rs73176497 | rs56373884 | 19511 | 0.895 | chr22:44356468 | #N/A | #N/A | #N/A | #N/A | #N/A | #N/A |
| rs2294921  | rs4823109  | 19640 | 0.887 | chr22:44381482 | #N/A | #N/A | #N/A | #N/A | #N/A | #N/A |
| rs4823109  | rs2294921  | 19640 | 0.887 | chr22:44361842 | #N/A | #N/A | #N/A | #N/A | #N/A | #N/A |
| rs1010022  | rs56373884 | 20158 | 0.895 | chr22:44356468 | #N/A | #N/A | #N/A | #N/A | #N/A | #N/A |
| rs13055874 | rs2294921  | 20170 | 0.895 | chr22:44361842 | #N/A | #N/A | #N/A | #N/A | #N/A | #N/A |
| rs13055900 | rs2294921  | 20176 | 0.895 | chr22:44361842 | #N/A | #N/A | #N/A | #N/A | #N/A | #N/A |
| rs4823181  | rs2294921  | 20236 | 0.895 | chr22:44361842 | #N/A | #N/A | #N/A | #N/A | #N/A | #N/A |
| rs1010023  | rs56373884 | 20370 | 0.895 | chr22:44356468 | #N/A | #N/A | #N/A | #N/A | #N/A | #N/A |
| rs56373884 | rs1010023  | 20370 | 0.895 | chr22:44336098 | #N/A | #N/A | #N/A | #N/A | #N/A | #N/A |
| rs4823180  | rs2294921  | 20544 | 0.895 | chr22:44361842 | #N/A | #N/A | #N/A | #N/A | #N/A | #N/A |
| rs2294921  | rs4823179  | 20649 | 0.895 | chr22:44341193 | #N/A | #N/A | #N/A | #N/A | #N/A | #N/A |
| rs4823179  | rs2294921  | 20649 | 0.895 | chr22:44361842 | #N/A | #N/A | #N/A | #N/A | #N/A | #N/A |
| rs2073081  | rs56373884 | 20724 | 0.895 | chr22:44356468 | #N/A | #N/A | #N/A | #N/A | #N/A | #N/A |
| rs2294916  | rs2294921  | 20920 | 0.83  | chr22:44361842 | #N/A | #N/A | #N/A | #N/A | #N/A | #N/A |
| rs34352134 | rs56373884 | 21052 | 0.895 | chr22:44356468 | #N/A | #N/A | #N/A | #N/A | #N/A | #N/A |
| rs56373884 | rs34352134 | 21052 | 0.895 | chr22:44355416 | #N/A | #N/A | #N/A | #N/A | #N/A | #N/A |
| rs35621602 | rs56373884 | 21062 | 0.895 | chr22:44356468 | #N/A | #N/A | #N/A | #N/A | #N/A | #N/A |
| rs16991175 | rs56373884 | 21137 | 0.836 | chr22:44356468 | #N/A | #N/A | #N/A | #N/A | #N/A | #N/A |
| rs2235776  | rs56373884 | 21531 | 0.887 | chr22:44356468 | #N/A | #N/A | #N/A | #N/A | #N/A | #N/A |
| rs36069781 | rs2294921  | 21756 | 0.895 | chr22:44361842 | #N/A | #N/A | #N/A | #N/A | #N/A | #N/A |
| rs4823178  | rs56373884 | 21939 | 0.836 | chr22:44356468 | #N/A | #N/A | #N/A | #N/A | #N/A | #N/A |
| rs56373884 | rs4823178  | 21939 | 0.836 | chr22:44334529 | #N/A | #N/A | #N/A | #N/A | #N/A | #N/A |
| rs4823177  | rs56373884 | 21982 | 0.836 | chr22:44356468 | #N/A | #N/A | #N/A | #N/A | #N/A | #N/A |
| rs56373884 | rs4823177  | 21982 | 0.836 | chr22:44334486 | #N/A | #N/A | #N/A | #N/A | #N/A | #N/A |
| rs4823176  | rs56373884 | 21992 | 0.836 | chr22:44356468 | #N/A | #N/A | #N/A | #N/A | #N/A | #N/A |
| rs56373884 | rs4823176  | 21992 | 0.836 | chr22:44334476 | #N/A | #N/A | #N/A | #N/A | #N/A | #N/A |
| rs13056555 | rs2294921  | 22316 | 0.895 | chr22:44361842 | #N/A | #N/A | #N/A | #N/A | #N/A | #N/A |
| rs2235777  | rs56373884 | 22341 | 0.887 | chr22:44356468 | #N/A | #N/A | #N/A | #N/A | #N/A | #N/A |
| rs2896020  | rs56373884 | 22500 | 0.895 | chr22:44356468 | #N/A | #N/A | #N/A | #N/A | #N/A | #N/A |
| rs2401512  | rs56373884 | 22523 | 0.895 | chr22:44356468 | #N/A | #N/A | #N/A | #N/A | #N/A | #N/A |
| rs2896019  | rs56373884 | 22774 | 0.895 | chr22:44356468 | #N/A | #N/A | #N/A | #N/A | #N/A | #N/A |
| rs2072905  | rs56373884 | 22989 | 0.895 | chr22:44356468 | #N/A | #N/A | #N/A | #N/A | #N/A | #N/A |
| rs56373884 | rs2072905  | 22989 | 0.895 | chr22:44333479 | #N/A | #N/A | #N/A | #N/A | #N/A | #N/A |
| rs2076207  | rs56373884 | 23098 | 0.895 | chr22:44356468 | #N/A | #N/A | #N/A | #N/A | #N/A | #N/A |
| rs2294923  | rs56373884 | 23272 | 0.887 | chr22:44356468 | #N/A | #N/A | #N/A | #N/A | #N/A | #N/A |
| rs2072906  | rs56373884 | 23296 | 0.895 | chr22:44356468 | #N/A | #N/A | #N/A | #N/A | #N/A | #N/A |
| rs9626079  | rs56373884 | 23541 | 0.887 | chr22:44356468 | #N/A | #N/A | #N/A | #N/A | #N/A | #N/A |
| rs34879941 | rs56373884 | 23590 | 0.895 | chr22:44356468 | #N/A | #N/A | #N/A | #N/A | #N/A | #N/A |
| rs56373884 | rs34879941 | 23590 | 0.895 | chr22:44332878 | #N/A | #N/A | #N/A | #N/A | #N/A | #N/A |
| rs2072907  | rs56373884 | 23815 | 0.895 | chr22:44356468 | #N/A | #N/A | #N/A | #N/A | #N/A | #N/A |
| rs2281135  | rs56373884 | 23898 | 0.895 | chr22:44356468 | #N/A | #N/A | #N/A | #N/A | #N/A | #N/A |
| rs2281138  | rs56373884 | 23991 | 0.895 | chr22:44356468 | #N/A | #N/A | #N/A | #N/A | #N/A | #N/A |
| rs926633   | rs2294921  | 24309 | 0.895 | chr22:44361842 | #N/A | #N/A | #N/A | #N/A | #N/A | #N/A |
| rs1883349  | rs56373884 | 24525 | 0.895 | chr22:44356468 | #N/A | #N/A | #N/A | #N/A | #N/A | #N/A |
| rs1883348  | rs56373884 | 24653 | 0.895 | chr22:44356468 | #N/A | #N/A | #N/A | #N/A | #N/A | #N/A |
| rs56373884 | rs1883348  | 24653 | 0.895 | chr22:44331815 | #N/A | #N/A | #N/A | #N/A | #N/A | #N/A |
| rs13056638 | rs56373884 | 24690 | 0.895 | chr22:44356468 | #N/A | #N/A | #N/A | #N/A | #N/A | #N/A |
| rs4823108  | rs56373884 | 24872 | 0.887 | chr22:44356468 | #N/A | #N/A | #N/A | #N/A | #N/A | #N/A |
| rs56373884 | rs4823108  | 24872 | 0.887 | chr22:44381340 | #N/A | #N/A | #N/A | #N/A | #N/A | #N/A |
| rs2294921  | rs73176497 | 24885 | 0.895 | chr22:44336957 | #N/A | #N/A | #N/A | #N/A | #N/A | #N/A |
| rs73176497 | rs2294921  | 24885 | 0.895 | chr22:44361842 | #N/A | #N/A | #N/A | #N/A | #N/A | #N/A |
| rs1997693  | rs56373884 | 24955 | 0.895 | chr22:44356468 | #N/A | #N/A | #N/A | #N/A | #N/A | #N/A |
| rs4823109  | rs56373884 | 25014 | 0.887 | chr22:44356468 | #N/A | #N/A | #N/A | #N/A | #N/A | #N/A |
| rs56373884 | rs4823109  | 25014 | 0.887 | chr22:44381482 | #N/A | #N/A | #N/A | #N/A | #N/A | #N/A |
| rs3761472  | rs2008451  | 25153 | 0.895 | chr22:44342969 | #N/A | #N/A | #N/A | #N/A | #N/A | #N/A |
| rs1010022  | rs2294921  | 25532 | 0.895 | chr22:44361842 | #N/A | #N/A | #N/A | #N/A | #N/A | #N/A |
| rs1010023  | rs2294921  | 25744 | 0.895 | chr22:44361842 | #N/A | #N/A | #N/A | #N/A | #N/A | #N/A |
| rs2294921  | rs1010023  | 25744 | 0.895 | chr22:44336098 | #N/A | #N/A | #N/A | #N/A | #N/A | #N/A |
| rs2073081  | rs2294921  | 26098 | 0.895 | chr22:44361842 | #N/A | #N/A | #N/A | #N/A | #N/A | #N/A |
| rs1977081  | rs56373884 | 26340 | 0.83  | chr22:44356468 | #N/A | #N/A | #N/A | #N/A | #N/A | #N/A |
| rs56373884 | rs1977081  | 26340 | 0.83  | chr22:44330128 | #N/A | #N/A | #N/A | #N/A | #N/A | #N/A |
| rs2294921  | rs34352134 | 26426 | 0.895 | chr22:44355416 | #N/A | #N/A | #N/A | #N/A | #N/A | #N/A |
| rs34352134 | rs2294921  | 26426 | 0.895 | chr22:44361842 | #N/A | #N/A | #N/A | #N/A | #N/A | #N/A |
| rs35621602 | rs2294921  | 26436 | 0.895 | chr22:44361842 | #N/A | #N/A | #N/A | #N/A | #N/A | #N/A |
| rs16991175 | rs2294921  | 26511 | 0.836 | chr22:44361842 | #N/A | #N/A | #N/A | #N/A | #N/A | #N/A |
| rs3761472  | rs4823179  | 26929 | 0.895 | chr22:44341193 | #N/A | #N/A | #N/A | #N/A | #N/A | #N/A |
| rs2294433  | rs56373884 | 27193 | 0.83  | chr22:44356468 | #N/A | #N/A | #N/A | #N/A | #N/A | #N/A |
| rs56373884 | rs2294433  | 27193 | 0.83  | chr22:44329275 | #N/A | #N/A | #N/A | #N/A | #N/A | #N/A |
| rs2294921  | rs4823178  | 27313 | 0.836 | chr22:44334529 | #N/A | #N/A | #N/A | #N/A | #N/A | #N/A |
| rs4823178  | rs2294921  | 27313 | 0.836 | chr22:44361842 | #N/A | #N/A | #N/A | #N/A | #N/A | #N/A |
| rs2294921  | rs4823177  | 27356 | 0.836 | chr22:44334486 | #N/A | #N/A | #N/A | #N/A | #N/A | #N/A |
| rs4823177  | rs2294921  | 27356 | 0.836 | chr22:44361842 | #N/A | #N/A | #N/A | #N/A | #N/A | #N/A |
| rs2294921  | rs4823176  | 27366 | 0.836 | chr22:44334476 | #N/A | #N/A | #N/A | #N/A | #N/A | #N/A |
| rs4823176  | rs2294921  | 27366 | 0.836 | chr22:44361842 | #N/A | #N/A | #N/A | #N/A | #N/A | #N/A |
| rs2076211  | rs56373884 | 27390 | 0.83  | chr22:44356468 | #N/A | #N/A | #N/A | #N/A | #N/A | #N/A |
| rs56373884 | rs2076211  | 27390 | 0.83  | chr22:44329078 | #N/A | #N/A | #N/A | #N/A | #N/A | #N/A |
| rs4823173  | rs56373884 | 27738 | 0.83  | chr22:44356468 | #N/A | #N/A | #N/A | #N/A | #N/A | #N/A |
| rs56373884 | rs4823173  | 27738 | 0.83  | chr22:44328730 | #N/A | #N/A | #N/A | #N/A | #N/A | #N/A |
| rs2896020  | rs2294921  | 27874 | 0.895 | chr22:44361842 | #N/A | #N/A | #N/A | #N/A | #N/A | #N/A |
| rs2401512  | rs2294921  | 27897 | 0.895 | chr22:44361842 | #N/A | #N/A | #N/A | #N/A | #N/A | #N/A |
| rs2896019  | rs2294921  | 28148 | 0.895 | chr22:44361842 | #N/A | #N/A | #N/A | #N/A | #N/A | #N/A |
| rs2072905  | rs2294921  | 28363 | 0.895 | chr22:44361842 | #N/A | #N/A | #N/A | #N/A | #N/A | #N/A |

|             |             |        |       |                 |      |      |      |      |      |      |
|-------------|-------------|--------|-------|-----------------|------|------|------|------|------|------|
| rs2294921   | rs2072905   | 28363  | 0.895 | chr22:44333479  | #N/A | #N/A | #N/A | #N/A | #N/A | #N/A |
| rs2076207   | rs2294921   | 28472  | 0.895 | chr22:44361842  | #N/A | #N/A | #N/A | #N/A | #N/A | #N/A |
| rs2072906   | rs2294921   | 28670  | 0.895 | chr22:44361842  | #N/A | #N/A | #N/A | #N/A | #N/A | #N/A |
| rs2294921   | rs34879941  | 28964  | 0.895 | chr22:44332878  | #N/A | #N/A | #N/A | #N/A | #N/A | #N/A |
| rs34879941  | rs2294921   | 28964  | 0.895 | chr22:44361842  | #N/A | #N/A | #N/A | #N/A | #N/A | #N/A |
| rs2072907   | rs2294921   | 29189  | 0.895 | chr22:44361842  | #N/A | #N/A | #N/A | #N/A | #N/A | #N/A |
| rs12484700  | rs56373884  | 29195  | 0.83  | chr22:44356468  | #N/A | #N/A | #N/A | #N/A | #N/A | #N/A |
| rs56373884  | rs12484700  | 29195  | 0.83  | chr22:44327273  | #N/A | #N/A | #N/A | #N/A | #N/A | #N/A |
| rs2281135   | rs2294921   | 29272  | 0.895 | chr22:44361842  | #N/A | #N/A | #N/A | #N/A | #N/A | #N/A |
| rs36055245  | rs56373884  | 29276  | 0.83  | chr22:44356468  | #N/A | #N/A | #N/A | #N/A | #N/A | #N/A |
| rs2281138   | rs2294921   | 29365  | 0.895 | chr22:44361842  | #N/A | #N/A | #N/A | #N/A | #N/A | #N/A |
| rs11090617  | rs56373884  | 29768  | 0.83  | chr22:44356468  | #N/A | #N/A | #N/A | #N/A | #N/A | #N/A |
| rs1883349   | rs2294921   | 29899  | 0.895 | chr22:44361842  | #N/A | #N/A | #N/A | #N/A | #N/A | #N/A |
| rs1883348   | rs2294921   | 30027  | 0.895 | chr22:44361842  | #N/A | #N/A | #N/A | #N/A | #N/A | #N/A |
| rs2294921   | rs1883348   | 30027  | 0.895 | chr22:44331815  | #N/A | #N/A | #N/A | #N/A | #N/A | #N/A |
| rs13056638  | rs2294921   | 30064  | 0.895 | chr22:44361842  | #N/A | #N/A | #N/A | #N/A | #N/A | #N/A |
| rs9625962   | rs56373884  | 30196  | 0.83  | chr22:44356468  | #N/A | #N/A | #N/A | #N/A | #N/A | #N/A |
| rs1997693   | rs2294921   | 30329  | 0.895 | chr22:44361842  | #N/A | #N/A | #N/A | #N/A | #N/A | #N/A |
| rs12483959  | rs56373884  | 30472  | 0.83  | chr22:44356468  | #N/A | #N/A | #N/A | #N/A | #N/A | #N/A |
| rs3761472   | rs73176497  | 31165  | 0.895 | chr22:44336957  | #N/A | #N/A | #N/A | #N/A | #N/A | #N/A |
| rs1977081   | rs2294921   | 31714  | 0.83  | chr22:44361842  | #N/A | #N/A | #N/A | #N/A | #N/A | #N/A |
| rs2294921   | rs1977081   | 31714  | 0.83  | chr22:44330128  | #N/A | #N/A | #N/A | #N/A | #N/A | #N/A |
| rs3761472   | rs1010023   | 32024  | 0.895 | chr22:44336098  | #N/A | #N/A | #N/A | #N/A | #N/A | #N/A |
| rs1474745   | rs4823108   | 32104  | 0.838 | chr22:44381340  | #N/A | #N/A | #N/A | #N/A | #N/A | #N/A |
| rs1474745   | rs4823109   | 32246  | 0.838 | chr22:44381482  | #N/A | #N/A | #N/A | #N/A | #N/A | #N/A |
| rs2294433   | rs2294921   | 32567  | 0.83  | chr22:44361842  | #N/A | #N/A | #N/A | #N/A | #N/A | #N/A |
| rs2294921   | rs2294433   | 32567  | 0.83  | chr22:44329275  | #N/A | #N/A | #N/A | #N/A | #N/A | #N/A |
| rs3761472   | rs34352134  | 32706  | 0.895 | chr22:44335416  | #N/A | #N/A | #N/A | #N/A | #N/A | #N/A |
| rs2076211   | rs2294921   | 32764  | 0.83  | chr22:44361842  | #N/A | #N/A | #N/A | #N/A | #N/A | #N/A |
| rs2294921   | rs2076211   | 32764  | 0.83  | chr22:44329078  | #N/A | #N/A | #N/A | #N/A | #N/A | #N/A |
| rs34912062  | rs4823108   | 32894  | 0.838 | chr22:44381340  | #N/A | #N/A | #N/A | #N/A | #N/A | #N/A |
| rs34912062  | rs4823109   | 33036  | 0.838 | chr22:44381482  | #N/A | #N/A | #N/A | #N/A | #N/A | #N/A |
| rs2294921   | rs4823173   | 33112  | 0.83  | chr22:44328730  | #N/A | #N/A | #N/A | #N/A | #N/A | #N/A |
| rs4823173   | rs2294921   | 33112  | 0.83  | chr22:44361842  | #N/A | #N/A | #N/A | #N/A | #N/A | #N/A |
| rs3761472   | rs4823178   | 33593  | 0.836 | chr22:44334529  | #N/A | #N/A | #N/A | #N/A | #N/A | #N/A |
| rs3761472   | rs4823177   | 33636  | 0.836 | chr22:44334486  | #N/A | #N/A | #N/A | #N/A | #N/A | #N/A |
| rs3761472   | rs4823176   | 33646  | 0.836 | chr22:44334476  | #N/A | #N/A | #N/A | #N/A | #N/A | #N/A |
| rs2092501   | rs4823108   | 34089  | 0.838 | chr22:44381340  | #N/A | #N/A | #N/A | #N/A | #N/A | #N/A |
| rs2092501   | rs4823109   | 34231  | 0.838 | chr22:44381482  | #N/A | #N/A | #N/A | #N/A | #N/A | #N/A |
| rs12484700  | rs2294921   | 34569  | 0.83  | chr22:44361842  | #N/A | #N/A | #N/A | #N/A | #N/A | #N/A |
| rs2294921   | rs12484700  | 34569  | 0.83  | chr22:44327273  | #N/A | #N/A | #N/A | #N/A | #N/A | #N/A |
| rs3761472   | rs2072905   | 34643  | 0.895 | chr22:44333479  | #N/A | #N/A | #N/A | #N/A | #N/A | #N/A |
| rs36055245  | rs2294921   | 34650  | 0.83  | chr22:44361842  | #N/A | #N/A | #N/A | #N/A | #N/A | #N/A |
| rs11090617  | rs2294921   | 35142  | 0.83  | chr22:44361842  | #N/A | #N/A | #N/A | #N/A | #N/A | #N/A |
| rs3761472   | rs34879941  | 35244  | 0.895 | chr22:44332878  | #N/A | #N/A | #N/A | #N/A | #N/A | #N/A |
| rs9625962   | rs2294921   | 35570  | 0.83  | chr22:44361842  | #N/A | #N/A | #N/A | #N/A | #N/A | #N/A |
| rs12483959  | rs2294921   | 35846  | 0.83  | chr22:44361842  | #N/A | #N/A | #N/A | #N/A | #N/A | #N/A |
| rs3761472   | rs1883348   | 36307  | 0.895 | chr22:44331815  | #N/A | #N/A | #N/A | #N/A | #N/A | #N/A |
| rs3761472   | rs1977081   | 37994  | 0.83  | chr22:44330128  | #N/A | #N/A | #N/A | #N/A | #N/A | #N/A |
| rs2294915   | rs2294921   | 38661  | 0.83  | chr22:44379565  | #N/A | #N/A | #N/A | #N/A | #N/A | #N/A |
| rs3761472   | rs2294433   | 38847  | 0.83  | chr22:44329275  | #N/A | #N/A | #N/A | #N/A | #N/A | #N/A |
| rs3761472   | rs2076211   | 39044  | 0.83  | chr22:44329078  | #N/A | #N/A | #N/A | #N/A | #N/A | #N/A |
| rs3761472   | rs4823173   | 39392  | 0.83  | chr22:44328730  | #N/A | #N/A | #N/A | #N/A | #N/A | #N/A |
| rs58542926  | rs739846    | 39522  | 0.803 | chr19:19419071  | #N/A | #N/A | #N/A | #N/A | #N/A | #N/A |
| rs3761472   | rs12484700  | 40849  | 0.83  | chr22:44327273  | #N/A | #N/A | #N/A | #N/A | #N/A | #N/A |
| rs10401969  | rs73001065  | 52823  | 0.901 | chr19:19460541  | #N/A | #N/A | #N/A | #N/A | #N/A | #N/A |
| rs10401969  | rs56255430  | 70159  | 0.901 | chr19:19477877  | #N/A | #N/A | #N/A | #N/A | #N/A | #N/A |
| rs58542926  | rs73001065  | 80992  | 0.892 | chr19:19460541  | #N/A | #N/A | #N/A | #N/A | #N/A | #N/A |
| rs58542926  | rs56255430  | 98328  | 0.892 | chr19:19477877  | #N/A | #N/A | #N/A | #N/A | #N/A | #N/A |
| rs10401969  | rs73004933  | 267978 | 1     | chr19:19675696  | #N/A | #N/A | #N/A | #N/A | #N/A | #N/A |
| rs58542926  | rs73004933  | 296147 | 0.803 | chr19:19675696  | #N/A | #N/A | #N/A | #N/A | #N/A | #N/A |
| rs10401969  | rs73004959  | 303421 | 0.808 | chr19:19711139  | #N/A | #N/A | #N/A | #N/A | #N/A | #N/A |
| rs10401969  | rs12610191  | 314258 | 0.908 | chr19:19721976  | #N/A | #N/A | #N/A | #N/A | #N/A | #N/A |
| rs10401969  | rs58847337  | 318304 | 0.908 | chr19:19726022  | #N/A | #N/A | #N/A | #N/A | #N/A | #N/A |
| rs58542926  | rs73004959  | 331590 | 0.803 | chr19:19711139  | #N/A | #N/A | #N/A | #N/A | #N/A | #N/A |
| rs12484809  | rs12484809  | 0      | 1     | chr22:44325631  | #N/A | #N/A | #N/A | #N/A | #N/A | #N/A |
| rs2294927   | rs2294927   | 0      | 1     | chr22:44382684  | #N/A | #N/A | #N/A | #N/A | #N/A | #N/A |
| rs12167845  | rs12167845  | 0      | 1     | chr22:44380767  | #N/A | #N/A | #N/A | #N/A | #N/A | #N/A |
| rs12484795  | rs12484795  | 0      | 1     | chr22:44343626  | #N/A | #N/A | #N/A | #N/A | #N/A | #N/A |
| rs12484801  | rs12484801  | 0      | 1     | chr22:44325565  | #N/A | #N/A | #N/A | #N/A | #N/A | #N/A |
| rs12485100  | rs12485100  | 0      | 1     | chr22:44325516  | #N/A | #N/A | #N/A | #N/A | #N/A | #N/A |
| rs12688220  | rs12688220  | 0      | 1     | chr23:107001537 | #N/A | #N/A | #N/A | #N/A | #N/A | #N/A |
| rs13054885  | rs13054885  | 0      | 1     | chr22:44345771  | #N/A | #N/A | #N/A | #N/A | #N/A | #N/A |
| rs1810508   | rs1810508   | 0      | 1     | chr22:44343151  | #N/A | #N/A | #N/A | #N/A | #N/A | #N/A |
| rs1986095   | rs1986095   | 0      | 1     | chr22:44387108  | #N/A | #N/A | #N/A | #N/A | #N/A | #N/A |
| rs201016637 | rs201016637 | 0      | 1     | chr22:44325479  | #N/A | #N/A | #N/A | #N/A | #N/A | #N/A |
| rs2281293   | rs2281293   | 0      | 1     | chr22:44334842  | #N/A | #N/A | #N/A | #N/A | #N/A | #N/A |
| rs34376930  | rs34376930  | 0      | 1     | chr22:44335453  | #N/A | #N/A | #N/A | #N/A | #N/A | #N/A |
| rs4823183   | rs4823183   | 0      | 1     | chr22:44378672  | #N/A | #N/A | #N/A | #N/A | #N/A | #N/A |
| rs66812091  | rs66812091  | 0      | 1     | chr22:44335670  | #N/A | #N/A | #N/A | #N/A | #N/A | #N/A |
| rs71313378  | rs71313378  | 0      | 1     | chr22:44380170  | #N/A | #N/A | #N/A | #N/A | #N/A | #N/A |
| rs8142145   | rs8142145   | 0      | 1     | chr22:44336496  | #N/A | #N/A | #N/A | #N/A | #N/A | #N/A |

## **Supplemental Digital Content 5**



## **Supplemental Digital Content 6**



## **Supplemental Digital Content 7**

| <i>ENSG ID</i>  | <i>HUGO ID</i> | <i>P-VALUE</i> | <i>OR</i>   |
|-----------------|----------------|----------------|-------------|
| ENSG00000186854 | TRABD2A        | 0.000134441    | 29.77707006 |
| ENSG00000176900 | OR51T1         | 0.000263073    | 11.68845316 |
| ENSG00000135540 | NHSL1          | 0.000335927    | 8.106040268 |
| ENSG00000075234 | TTC38          | 0.000632977    | 24.39130435 |
| ENSG00000172006 | ZNF554         | 0.000632977    | 24.39130435 |
| ENSG00000177599 | ZNF491         | 0.000632977    | 24.39130435 |
| ENSG00000105135 | ILVBL          | 0.000668516    | 7.513907285 |
| ENSG00000163673 | DCLK3          | 0.0011087      | 9.819532909 |
| ENSG00000107186 | MPDZ           | 0.001314548    | 5.72674976  |
| ENSG00000197748 | WDR96          | 0.001359729    | 21.79754601 |
| ENSG00000155657 | TTN            | 0.001767795    | 2.596033192 |
| ENSG00000184344 | GDF3           | 0.002238104    | 8.92033543  |
| ENSG00000270617 | URGCP-MRPS24   | 0.002238104    | 8.92033543  |
| ENSG00000103335 | PIEZO1         | 0.002477231    | 5.308420057 |
| ENSG00000175003 | SLC22A1        | 0.002544752    | 6.375483871 |
| ENSG00000158486 | DNAH3          | 0.002706824    | 3.914348063 |
| ENSG00000110697 | PITPNM1        | 0.002901861    | 19.26666667 |
| ENSG00000116128 | BCL9           | 0.002901861    | 19.26666667 |
| ENSG00000124827 | GCM2           | 0.002901861    | 19.26666667 |
| ENSG00000133069 | TMCC2          | 0.002901861    | 19.26666667 |
| ENSG00000182634 | OR10G7         | 0.002901861    | 19.26666667 |
| ENSG00000257008 | GPR142         | 0.002901861    | 19.26666667 |
| ENSG00000103197 | TSC2           | 0.004464588    | 8.043478261 |
| ENSG00000124615 | MOCS1          | 0.004464588    | 8.043478261 |
| ENSG00000167676 | PLIN4          | 0.004464588    | 8.043478261 |
| ENSG00000198105 | ZNF248         | 0.004464588    | 8.043478261 |
| ENSG00000181143 | MUC16          | 0.004614115    | 2.860283047 |
| ENSG00000183091 | NEB            | 0.004734459    | 3.671328671 |
| ENSG00000004399 | PLXND1         | 0.006153345    | 16.79640719 |
| ENSG00000110799 | VWF            | 0.006153345    | 16.79640719 |
| ENSG00000114646 | CSPG5          | 0.006153345    | 16.79640719 |
| ENSG00000136250 | AOAH           | 0.006153345    | 16.79640719 |
| ENSG00000138835 | RGS3           | 0.006153345    | 16.79640719 |
| ENSG00000084674 | APOB           | 0.007206583    | 4.083149375 |
| ENSG00000137337 | MDC1           | 0.008395936    | 4.504147465 |
| ENSG00000106608 | URGCP          | 0.008794467    | 7.188139059 |
| ENSG00000140945 | CDH13          | 0.008794467    | 7.188139059 |
| ENSG00000158545 | ZC3H18         | 0.008794467    | 7.188139059 |
| ENSG00000164287 | CDC20B         | 0.008794467    | 7.188139059 |
| ENSG00000124215 | CDH26          | 0.009149345    | 5.294339623 |
| ENSG00000166866 | MYO1A          | 0.009149345    | 5.294339623 |
| ENSG00000261272 | MUC22          | 0.012675657    | 3.769789397 |
| ENSG00000049246 | PER3           | 0.012965976    | 14.38461538 |
| ENSG00000061936 | SFSWAP         | 0.012965976    | 14.38461538 |
| ENSG00000067365 | METTL22        | 0.012965976    | 14.38461538 |
| ENSG00000095951 | HIVEP1         | 0.012965976    | 14.38461538 |

|                 |           |             |             |
|-----------------|-----------|-------------|-------------|
| ENSG00000102057 | KCND1     | 0.012965976 | 14.38461538 |
| ENSG00000115464 | USP34     | 0.012965976 | 14.38461538 |
| ENSG00000121797 | CCRL2     | 0.012965976 | 14.38461538 |
| ENSG00000129351 | ILF3      | 0.012965976 | 14.38461538 |
| ENSG00000135697 | BCMO1     | 0.012965976 | 14.38461538 |
| ENSG00000136521 | NDUFB5    | 0.012965976 | 14.38461538 |
| ENSG00000149781 | FERMT3    | 0.012965976 | 14.38461538 |
| ENSG00000152056 | AP1S3     | 0.012965976 | 14.38461538 |
| ENSG00000153246 | PLA2R1    | 0.012965976 | 14.38461538 |
| ENSG00000176746 | MAGEB6    | 0.012965976 | 14.38461538 |
| ENSG00000182983 | ZNF662    | 0.012965976 | 14.38461538 |
| ENSG00000186977 | KRTAP19-5 | 0.012965976 | 14.38461538 |
| ENSG00000115760 | BIRC6     | 0.0150746   | 4.117379436 |
| ENSG00000182348 | ZNF804B   | 0.0150746   | 4.117379436 |
| ENSG00000007174 | DNAH9     | 0.016943555 | 4.773913043 |
| ENSG00000102387 | TAF7L     | 0.016943555 | 4.773913043 |
| ENSG00000118200 | CAMSAP2   | 0.016943555 | 4.773913043 |
| ENSG00000145734 | BDP1      | 0.016943555 | 4.773913043 |
| ENSG00000149577 | SIDT2     | 0.016943555 | 4.773913043 |
| ENSG00000157741 | UBN2      | 0.016943555 | 4.773913043 |
| ENSG00000197893 | NRAP      | 0.016943555 | 4.773913043 |
| ENSG00000064687 | ABCA7     | 0.017090715 | 6.353535354 |
| ENSG00000082516 | GEMIN5    | 0.017090715 | 6.353535354 |
| ENSG00000084112 | SSH1      | 0.017090715 | 6.353535354 |
| ENSG00000107249 | GLIS3     | 0.017090715 | 6.353535354 |
| ENSG00000174123 | TLR10     | 0.017090715 | 6.353535354 |
| ENSG00000181638 | ZFP41     | 0.017090715 | 6.353535354 |
| ENSG00000185888 | PRSS38    | 0.017090715 | 6.353535354 |
| ENSG00000187240 | DYNC2H1   | 0.017090715 | 6.353535354 |
| ENSG00000187527 | ATP13A5   | 0.017090715 | 6.353535354 |
| ENSG00000187957 | DNER      | 0.017090715 | 6.353535354 |
| ENSG00000188888 | GPR179    | 0.017090715 | 6.353535354 |
| ENSG00000197226 | TBC1D9B   | 0.017090715 | 6.353535354 |
| ENSG00000243729 | OR5V1     | 0.017090715 | 6.353535354 |
| ENSG00000264668 | ZFP41     | 0.017090715 | 6.353535354 |
| ENSG00000128655 | PDE11A    | 0.017528676 | 3.303431668 |
| ENSG00000078674 | PCM1      | 0.021893228 | 3.464516129 |
| ENSG00000154358 | OBSCN     | 0.021893228 | 3.464516129 |
| ENSG00000104237 | RP1       | 0.026579756 | 3.74034142  |
| ENSG00000008517 | IL32      | 0.02715228  | 12.02923977 |
| ENSG00000026751 | SLAMF7    | 0.02715228  | 12.02923977 |
| ENSG00000034152 | MAP2K3    | 0.02715228  | 12.02923977 |
| ENSG00000049247 | UTS2      | 0.02715228  | 12.02923977 |
| ENSG00000058335 | RASGRF1   | 0.02715228  | 12.02923977 |
| ENSG00000066230 | SLC9A3    | 0.02715228  | 12.02923977 |
| ENSG00000078725 | BRINP1    | 0.02715228  | 12.02923977 |
| ENSG00000087074 | PPP1R15A  | 0.02715228  | 12.02923977 |

|                 |           |             |             |
|-----------------|-----------|-------------|-------------|
| ENSG00000100092 | SH3BP1    | 0.02715228  | 12.02923977 |
| ENSG00000106123 | EPHB6     | 0.02715228  | 12.02923977 |
| ENSG00000107537 | PHYH      | 0.02715228  | 12.02923977 |
| ENSG00000107560 | RAB11FIP2 | 0.02715228  | 12.02923977 |
| ENSG00000109133 | TMEM33    | 0.02715228  | 12.02923977 |
| ENSG00000112280 | COL9A1    | 0.02715228  | 12.02923977 |
| ENSG00000114378 | HYAL1     | 0.02715228  | 12.02923977 |
| ENSG00000118898 | PPL       | 0.02715228  | 12.02923977 |
| ENSG00000120949 | TNFRSF8   | 0.02715228  | 12.02923977 |
| ENSG00000126822 | PLEKHG3   | 0.02715228  | 12.02923977 |
| ENSG00000127324 | TSPAN8    | 0.02715228  | 12.02923977 |
| ENSG00000130413 | STK33     | 0.02715228  | 12.02923977 |
| ENSG00000134339 | SAA2      | 0.02715228  | 12.02923977 |
| ENSG00000135318 | NT5E      | 0.02715228  | 12.02923977 |
| ENSG00000135473 | PAN2      | 0.02715228  | 12.02923977 |
| ENSG00000141956 | PRDM15    | 0.02715228  | 12.02923977 |
| ENSG00000143061 | IGSF3     | 0.02715228  | 12.02923977 |
| ENSG00000145730 | PAM       | 0.02715228  | 12.02923977 |
| ENSG00000150687 | PRSS23    | 0.02715228  | 12.02923977 |
| ENSG00000155561 | NUP205    | 0.02715228  | 12.02923977 |
| ENSG00000158292 | GPR153    | 0.02715228  | 12.02923977 |
| ENSG00000162877 | PM20D1    | 0.02715228  | 12.02923977 |
| ENSG00000164253 | WDR41     | 0.02715228  | 12.02923977 |
| ENSG00000164659 | KIAA1324L | 0.02715228  | 12.02923977 |
| ENSG00000168542 | COL3A1    | 0.02715228  | 12.02923977 |
| ENSG00000172992 | DCAKD     | 0.02715228  | 12.02923977 |
| ENSG00000173214 | KIAA1919  | 0.02715228  | 12.02923977 |
| ENSG00000180061 | TMEM150B  | 0.02715228  | 12.02923977 |
| ENSG00000183578 | TNFAIP8L3 | 0.02715228  | 12.02923977 |
| ENSG00000197181 | PIWIL2    | 0.02715228  | 12.02923977 |
| ENSG00000197580 | BCO2      | 0.02715228  | 12.02923977 |
| ENSG00000132382 | MYBBP1A   | 0.029307141 | 3.049910873 |
| ENSG00000163092 | XIRP2     | 0.029307141 | 3.049910873 |
| ENSG00000079308 | TNS1      | 0.030836819 | 4.266257669 |
| ENSG00000124103 | FAM209A   | 0.030836819 | 4.266257669 |
| ENSG00000132669 | RIN2      | 0.030836819 | 4.266257669 |
| ENSG00000141959 | PFKL      | 0.030836819 | 4.266257669 |
| ENSG00000146233 | CYP39A1   | 0.030836819 | 4.266257669 |
| ENSG00000161996 | WDR90     | 0.030836819 | 4.266257669 |
| ENSG00000165029 | ABCA1     | 0.030836819 | 4.266257669 |
| ENSG00000179941 | BBS10     | 0.030836819 | 4.266257669 |
| ENSG00000198825 | INPP5F    | 0.030836819 | 4.266257669 |
| ENSG00000215041 | NEURL4    | 0.030836819 | 4.266257669 |
| ENSG00000005436 | GCFC2     | 0.032726251 | 5.538922156 |
| ENSG00000019144 | PHLDB1    | 0.032726251 | 5.538922156 |
| ENSG00000050555 | LAMC3     | 0.032726251 | 5.538922156 |
| ENSG00000054611 | TBC1D22A  | 0.032726251 | 5.538922156 |

|                 |          |             |             |
|-----------------|----------|-------------|-------------|
| ENSG00000058804 | NDC1     | 0.032726251 | 5.538922156 |
| ENSG00000073711 | PPP2R3A  | 0.032726251 | 5.538922156 |
| ENSG00000100767 | PAPLN    | 0.032726251 | 5.538922156 |
| ENSG00000115687 | PASK     | 0.032726251 | 5.538922156 |
| ENSG00000124678 | TCP11    | 0.032726251 | 5.538922156 |
| ENSG00000130037 | KCNA5    | 0.032726251 | 5.538922156 |
| ENSG00000132357 | CARD6    | 0.032726251 | 5.538922156 |
| ENSG00000132906 | CASP9    | 0.032726251 | 5.538922156 |
| ENSG00000135443 | KRT85    | 0.032726251 | 5.538922156 |
| ENSG00000138316 | ADAMTS14 | 0.032726251 | 5.538922156 |
| ENSG00000152527 | PLEKHH2  | 0.032726251 | 5.538922156 |
| ENSG00000152822 | GRM1     | 0.032726251 | 5.538922156 |
| ENSG00000153707 | PTPRD    | 0.032726251 | 5.538922156 |
| ENSG00000153922 | CHD1     | 0.032726251 | 5.538922156 |
| ENSG00000165935 | SMCO2    | 0.032726251 | 5.538922156 |
| ENSG00000170854 | MINA     | 0.032726251 | 5.538922156 |
| ENSG00000181616 | OR52H1   | 0.032726251 | 5.538922156 |
| ENSG00000182256 | GABRG3   | 0.032726251 | 5.538922156 |
| ENSG00000182944 | EWSR1    | 0.032726251 | 5.538922156 |
| ENSG00000185736 | ADARB2   | 0.032726251 | 5.538922156 |
| ENSG00000188984 | AADACL3  | 0.032726251 | 5.538922156 |
| ENSG00000189195 | BTBD8    | 0.032726251 | 5.538922156 |
| ENSG00000198842 | DUSP27   | 0.032726251 | 5.538922156 |
| ENSG00000204539 | CDSN     | 0.032726251 | 5.538922156 |
| ENSG00000205832 | C16orf96 | 0.032726251 | 5.538922156 |
| ENSG00000242419 | PCDHGC4  | 0.032726251 | 5.538922156 |
| ENSG00000124006 | OBSL1    | 0.037090877 | 3.167020524 |
| ENSG00000160111 | CPAMD8   | 0.037090877 | 3.167020524 |
| ENSG00000165323 | FAT3     | 0.037090877 | 3.167020524 |
| ENSG00000183914 | DNAH2    | 0.042493433 | 2.196881092 |
| ENSG00000042781 | USH2A    | 0.045024712 | 2.554362416 |
| ENSG00000204469 | PRRC2A   | 0.045024712 | 2.554362416 |
| ENSG00000073350 | LLGL2    | 0.045961198 | 3.372670807 |
| ENSG00000119720 | NRDE2    | 0.045961198 | 3.372670807 |
| ENSG00000137959 | IFI44L   | 0.045961198 | 3.372670807 |
| ENSG00000188352 | FOCAD    | 0.045961198 | 3.372670807 |
| ENSG00000196218 | RYR1     | 0.045961198 | 3.372670807 |
| ENSG00000086570 | FAT2     | 0.048032295 | 2.802932551 |
| ENSG00000042832 | TG       | 0.055064837 | 3.770909091 |
| ENSG00000065060 | UHRF1BP1 | 0.055064837 | 3.770909091 |
| ENSG00000083093 | PALB2    | 0.055064837 | 3.770909091 |
| ENSG00000100106 | TRIOBP   | 0.055064837 | 3.770909091 |
| ENSG00000122547 | EEPD1    | 0.055064837 | 3.770909091 |
| ENSG00000129071 | MBD4     | 0.055064837 | 3.770909091 |
| ENSG00000135968 | GCC2     | 0.055064837 | 3.770909091 |
| ENSG00000141556 | TBCD     | 0.055064837 | 3.770909091 |
| ENSG00000152359 | POC5     | 0.055064837 | 3.770909091 |

|                  |           |             |             |
|------------------|-----------|-------------|-------------|
| ENSG00000162591  | MEGF6     | 0.055064837 | 3.770909091 |
| ENSG00000163013  | FBXO41    | 0.055064837 | 3.770909091 |
| ENSG00000168404  | MLKL      | 0.055064837 | 3.770909091 |
| ENSG00000172159  | FRMD3     | 0.055064837 | 3.770909091 |
| ENSG00000177731  | FLII      | 0.055064837 | 3.770909091 |
| ENSG00000178804  | H1FOO     | 0.055064837 | 3.770909091 |
| ENSG00000180336  | C17orf104 | 0.055064837 | 3.770909091 |
| ENSG00000186393  | KRT26     | 0.055064837 | 3.770909091 |
| ENSG00000222028  | PSMB11    | 0.055064837 | 3.770909091 |
| ENSG00000005379  | BZRAP1    | 0.056514629 | 9.728323699 |
| ENSG00000008323  | PLEKHG6   | 0.056514629 | 9.728323699 |
| ENSG00000016602  | CLCA4     | 0.056514629 | 9.728323699 |
| ENSG000000027001 | MIPEP     | 0.056514629 | 9.728323699 |
| ENSG000000037474 | NSUN2     | 0.056514629 | 9.728323699 |
| ENSG000000041988 | THAP3     | 0.056514629 | 9.728323699 |
| ENSG000000047579 | DTNBP1    | 0.056514629 | 9.728323699 |
| ENSG000000069998 | CECR5     | 0.056514629 | 9.728323699 |
| ENSG000000070367 | EXOC5     | 0.056514629 | 9.728323699 |
| ENSG000000071991 | CDH19     | 0.056514629 | 9.728323699 |
| ENSG000000072210 | ALDH3A2   | 0.056514629 | 9.728323699 |
| ENSG000000077238 | IL4R      | 0.056514629 | 9.728323699 |
| ENSG000000078098 | FAP       | 0.056514629 | 9.728323699 |
| ENSG000000081692 | JMJD4     | 0.056514629 | 9.728323699 |
| ENSG000000086730 | LAT2      | 0.056514629 | 9.728323699 |
| ENSG000000090661 | CERS4     | 0.056514629 | 9.728323699 |
| ENSG000000099960 | SLC7A4    | 0.056514629 | 9.728323699 |
| ENSG00000101997  | CCDC22    | 0.056514629 | 9.728323699 |
| ENSG00000104321  | TRPA1     | 0.056514629 | 9.728323699 |
| ENSG00000105948  | TTC26     | 0.056514629 | 9.728323699 |
| ENSG00000106853  | PTGR1     | 0.056514629 | 9.728323699 |
| ENSG00000108309  | RUNDC3A   | 0.056514629 | 9.728323699 |
| ENSG00000108591  | DRG2      | 0.056514629 | 9.728323699 |
| ENSG00000109917  | ZNF259    | 0.056514629 | 9.728323699 |
| ENSG00000112200  | ZNF451    | 0.056514629 | 9.728323699 |
| ENSG00000113805  | CNTN3     | 0.056514629 | 9.728323699 |
| ENSG00000114423  | CBLB      | 0.056514629 | 9.728323699 |
| ENSG00000114767  | RRP9      | 0.056514629 | 9.728323699 |
| ENSG00000114779  | ABHD14B   | 0.056514629 | 9.728323699 |
| ENSG00000115896  | PLCL1     | 0.056514629 | 9.728323699 |
| ENSG00000117139  | KDM5B     | 0.056514629 | 9.728323699 |
| ENSG00000119333  | WDR34     | 0.056514629 | 9.728323699 |
| ENSG00000125450  | NUP85     | 0.056514629 | 9.728323699 |
| ENSG00000125633  | CCDC93    | 0.056514629 | 9.728323699 |
| ENSG00000125848  | FLRT3     | 0.056514629 | 9.728323699 |
| ENSG00000128513  | POT1      | 0.056514629 | 9.728323699 |
| ENSG00000130766  | SESN2     | 0.056514629 | 9.728323699 |
| ENSG00000132405  | TBC1D14   | 0.056514629 | 9.728323699 |

|                 |          |             |             |
|-----------------|----------|-------------|-------------|
| ENSG00000132821 | VSTM2L   | 0.056514629 | 9.728323699 |
| ENSG00000133027 | PEMT     | 0.056514629 | 9.728323699 |
| ENSG00000133710 | SPINK5   | 0.056514629 | 9.728323699 |
| ENSG00000134028 | ADAMDEC1 | 0.056514629 | 9.728323699 |
| ENSG00000134115 | CNTN6    | 0.056514629 | 9.728323699 |
| ENSG00000135315 | KIAA1009 | 0.056514629 | 9.728323699 |
| ENSG00000135406 | PRPH     | 0.056514629 | 9.728323699 |
| ENSG00000135617 | PRADC1   | 0.056514629 | 9.728323699 |
| ENSG00000136271 | DDX56    | 0.056514629 | 9.728323699 |
| ENSG00000137135 | ARHGEF39 | 0.056514629 | 9.728323699 |
| ENSG00000137992 | DBT      | 0.056514629 | 9.728323699 |
| ENSG00000138041 | SMEK2    | 0.056514629 | 9.728323699 |
| ENSG00000140279 | DUOX2    | 0.056514629 | 9.728323699 |
| ENSG00000140391 | TSPAN3   | 0.056514629 | 9.728323699 |
| ENSG00000141458 | NPC1     | 0.056514629 | 9.728323699 |
| ENSG00000141570 | CBX8     | 0.056514629 | 9.728323699 |
| ENSG00000141934 | PPAP2C   | 0.056514629 | 9.728323699 |
| ENSG00000143851 | PTPN7    | 0.056514629 | 9.728323699 |
| ENSG00000144645 | OSBPL10  | 0.056514629 | 9.728323699 |
| ENSG00000145220 | LYAR     | 0.056514629 | 9.728323699 |
| ENSG00000145390 | USP53    | 0.056514629 | 9.728323699 |
| ENSG00000145901 | TNIP1    | 0.056514629 | 9.728323699 |
| ENSG00000146555 | SDK1     | 0.056514629 | 9.728323699 |
| ENSG00000147649 | MTDH     | 0.056514629 | 9.728323699 |
| ENSG00000150967 | ABCB9    | 0.056514629 | 9.728323699 |
| ENSG00000155229 | MMS19    | 0.056514629 | 9.728323699 |
| ENSG00000155592 | ZKSCAN2  | 0.056514629 | 9.728323699 |
| ENSG00000157557 | ETS2     | 0.056514629 | 9.728323699 |
| ENSG00000161647 | MPP3     | 0.056514629 | 9.728323699 |
| ENSG00000161807 | OR7G1    | 0.056514629 | 9.728323699 |
| ENSG00000162775 | RBM15    | 0.056514629 | 9.728323699 |
| ENSG00000162782 | TDRD5    | 0.056514629 | 9.728323699 |
| ENSG00000163564 | PYHIN1   | 0.056514629 | 9.728323699 |
| ENSG00000163617 | KIAA1407 | 0.056514629 | 9.728323699 |
| ENSG00000163635 | ATXN7    | 0.056514629 | 9.728323699 |
| ENSG00000163808 | KIF15    | 0.056514629 | 9.728323699 |
| ENSG00000163947 | ARHGEF3  | 0.056514629 | 9.728323699 |
| ENSG00000164024 | METAP1   | 0.056514629 | 9.728323699 |
| ENSG00000164112 | TMEM155  | 0.056514629 | 9.728323699 |
| ENSG00000165409 | TSHR     | 0.056514629 | 9.728323699 |
| ENSG00000165591 | FAAH2    | 0.056514629 | 9.728323699 |
| ENSG00000166743 | ACSM1    | 0.056514629 | 9.728323699 |
| ENSG00000166831 | RBPM52   | 0.056514629 | 9.728323699 |
| ENSG00000167904 | TMEM68   | 0.056514629 | 9.728323699 |
| ENSG00000170266 | GLB1     | 0.056514629 | 9.728323699 |
| ENSG00000172037 | LAMB2    | 0.056514629 | 9.728323699 |
| ENSG00000172199 | OR8U1    | 0.056514629 | 9.728323699 |

|                 |            |             |             |
|-----------------|------------|-------------|-------------|
| ENSG00000173141 | MRP63      | 0.056514629 | 9.728323699 |
| ENSG00000174840 | PDE12      | 0.056514629 | 9.728323699 |
| ENSG00000175463 | TBC1D10C   | 0.056514629 | 9.728323699 |
| ENSG00000175697 | GPR156     | 0.056514629 | 9.728323699 |
| ENSG00000175711 | B3GNTL1    | 0.056514629 | 9.728323699 |
| ENSG00000175832 | ETV4       | 0.056514629 | 9.728323699 |
| ENSG00000179057 | IGSF22     | 0.056514629 | 9.728323699 |
| ENSG00000180479 | ZNF571     | 0.056514629 | 9.728323699 |
| ENSG00000182325 | FBXL6      | 0.056514629 | 9.728323699 |
| ENSG00000184014 | DENND5A    | 0.056514629 | 9.728323699 |
| ENSG00000184507 | NUTM1      | 0.056514629 | 9.728323699 |
| ENSG00000186230 | ZNF749     | 0.056514629 | 9.728323699 |
| ENSG00000186280 | KDM4D      | 0.056514629 | 9.728323699 |
| ENSG00000186340 | THBS2      | 0.056514629 | 9.728323699 |
| ENSG00000186470 | BTN3A2     | 0.056514629 | 9.728323699 |
| ENSG00000187187 | ZNF546     | 0.056514629 | 9.728323699 |
| ENSG00000188611 | ASAH2      | 0.056514629 | 9.728323699 |
| ENSG00000188786 | MTF1       | 0.056514629 | 9.728323699 |
| ENSG00000196358 | NTNG2      | 0.056514629 | 9.728323699 |
| ENSG00000196923 | PDLIM7     | 0.056514629 | 9.728323699 |
| ENSG00000196979 | AL360004.1 | 0.056514629 | 9.728323699 |
| ENSG00000198719 | DLL1       | 0.056514629 | 9.728323699 |
| ENSG00000221972 | C3orf36    | 0.056514629 | 9.728323699 |
| ENSG00000254184 | TYW1B      | 0.056514629 | 9.728323699 |
| ENSG00000255800 | OR13C5     | 0.056514629 | 9.728323699 |
| ENSG00000256087 | ZNF432     | 0.056514629 | 9.728323699 |
| ENSG00000135636 | DYSF       | 0.059094187 | 2.551533434 |
| ENSG00000136011 | STAB2      | 0.061556086 | 2.877009085 |
| ENSG00000177398 | UMODL1     | 0.061556086 | 2.877009085 |
| ENSG00000227184 | EPPK1      | 0.061556086 | 2.877009085 |
| ENSG00000012223 | LTF        | 0.06164414  | 4.743589744 |
| ENSG00000013374 | NUB1       | 0.06164414  | 4.743589744 |
| ENSG00000057593 | F7         | 0.06164414  | 4.743589744 |
| ENSG00000077935 | SMC1B      | 0.06164414  | 4.743589744 |
| ENSG00000078043 | PIAS2      | 0.06164414  | 4.743589744 |
| ENSG00000080815 | PSEN1      | 0.06164414  | 4.743589744 |
| ENSG00000095066 | HOOK2      | 0.06164414  | 4.743589744 |
| ENSG00000099139 | PCSK5      | 0.06164414  | 4.743589744 |
| ENSG00000100154 | TTC28      | 0.06164414  | 4.743589744 |
| ENSG00000100889 | PCK2       | 0.06164414  | 4.743589744 |
| ENSG00000101751 | POLI       | 0.06164414  | 4.743589744 |
| ENSG00000103522 | IL21R      | 0.06164414  | 4.743589744 |
| ENSG00000109920 | FNBP4      | 0.06164414  | 4.743589744 |
| ENSG00000112996 | MRPS30     | 0.06164414  | 4.743589744 |
| ENSG00000114446 | IFT57      | 0.06164414  | 4.743589744 |
| ENSG00000115138 | POMC       | 0.06164414  | 4.743589744 |
| ENSG00000115504 | EHBP1      | 0.06164414  | 4.743589744 |

|                 |         |            |             |
|-----------------|---------|------------|-------------|
| ENSG00000118322 | ATP10B  | 0.06164414 | 4.743589744 |
| ENSG00000124275 | MTRR    | 0.06164414 | 4.743589744 |
| ENSG00000126602 | TRAP1   | 0.06164414 | 4.743589744 |
| ENSG00000130590 | SAMD10  | 0.06164414 | 4.743589744 |
| ENSG00000130779 | CLIP1   | 0.06164414 | 4.743589744 |
| ENSG00000132842 | AP3B1   | 0.06164414 | 4.743589744 |
| ENSG00000133110 | POSTN   | 0.06164414 | 4.743589744 |
| ENSG00000133256 | PDE6B   | 0.06164414 | 4.743589744 |
| ENSG00000135436 | FAM186B | 0.06164414 | 4.743589744 |
| ENSG00000135439 | AGAP2   | 0.06164414 | 4.743589744 |
| ENSG00000135913 | USP37   | 0.06164414 | 4.743589744 |
| ENSG00000136243 | NUPL2   | 0.06164414 | 4.743589744 |
| ENSG00000137634 | NXPE4   | 0.06164414 | 4.743589744 |
| ENSG00000140287 | HDC     | 0.06164414 | 4.743589744 |
| ENSG00000142619 | PADI3   | 0.06164414 | 4.743589744 |
| ENSG00000142627 | EPHA2   | 0.06164414 | 4.743589744 |
| ENSG00000143498 | TAF1A   | 0.06164414 | 4.743589744 |
| ENSG00000143924 | EML4    | 0.06164414 | 4.743589744 |
| ENSG00000144488 | ESPNL   | 0.06164414 | 4.743589744 |
| ENSG00000148057 | IDNK    | 0.06164414 | 4.743589744 |
| ENSG00000148426 | PROSER2 | 0.06164414 | 4.743589744 |
| ENSG00000154760 | SLFN13  | 0.06164414 | 4.743589744 |
| ENSG00000154803 | FLCN    | 0.06164414 | 4.743589744 |
| ENSG00000156011 | PSD3    | 0.06164414 | 4.743589744 |
| ENSG00000156920 | GPR112  | 0.06164414 | 4.743589744 |
| ENSG00000159307 | SCUBE1  | 0.06164414 | 4.743589744 |
| ENSG00000160055 | TMEM234 | 0.06164414 | 4.743589744 |
| ENSG00000160404 | TOR2A   | 0.06164414 | 4.743589744 |
| ENSG00000163872 | YEATS2  | 0.06164414 | 4.743589744 |
| ENSG00000164796 | CSMD3   | 0.06164414 | 4.743589744 |
| ENSG00000166928 | MS4A14  | 0.06164414 | 4.743589744 |
| ENSG00000167549 | CORO6   | 0.06164414 | 4.743589744 |
| ENSG00000169814 | BTD     | 0.06164414 | 4.743589744 |
| ENSG00000170631 | ZNF16   | 0.06164414 | 4.743589744 |
| ENSG00000170775 | GPR37   | 0.06164414 | 4.743589744 |
| ENSG00000171017 | LRRC8E  | 0.06164414 | 4.743589744 |
| ENSG00000175497 | DPP10   | 0.06164414 | 4.743589744 |
| ENSG00000176715 | ACSF3   | 0.06164414 | 4.743589744 |
| ENSG00000178074 | C2orf69 | 0.06164414 | 4.743589744 |
| ENSG00000178921 | PFAS    | 0.06164414 | 4.743589744 |
| ENSG00000188827 | SLX4    | 0.06164414 | 4.743589744 |
| ENSG00000189190 | ZNF600  | 0.06164414 | 4.743589744 |
| ENSG00000196511 | TPK1    | 0.06164414 | 4.743589744 |
| ENSG00000198853 | RUSC2   | 0.06164414 | 4.743589744 |
| ENSG00000204296 | C6orf10 | 0.06164414 | 4.743589744 |
| ENSG00000204410 | MSH5    | 0.06164414 | 4.743589744 |
| ENSG00000204427 | ABHD16A | 0.06164414 | 4.743589744 |

|                 |              |             |             |
|-----------------|--------------|-------------|-------------|
| ENSG00000204520 | MICA         | 0.06164414  | 4.743589744 |
| ENSG00000205277 | MUC12        | 0.06164414  | 4.743589744 |
| ENSG00000206559 | ZCWPW2       | 0.06164414  | 4.743589744 |
| ENSG00000213762 | ZNF134       | 0.06164414  | 4.743589744 |
| ENSG00000241635 | UGT1A8       | 0.06164414  | 4.743589744 |
| ENSG00000258588 | TRIM6-TRIM34 | 0.06164414  | 4.743589744 |
| ENSG00000115423 | DNAH6        | 0.070065948 | 2.367770419 |
| ENSG00000151914 | DST          | 0.070065948 | 2.367770419 |
| ENSG00000179869 | ABCA13       | 0.076301907 | 2.086031452 |
| ENSG00000072121 | ZFYVE26      | 0.077072833 | 2.562246671 |
| ENSG00000183638 | RP1L1        | 0.077072833 | 2.562246671 |
| ENSG00000051341 | POLQ         | 0.077810857 | 3.014022787 |
| ENSG00000064692 | SNCAIP       | 0.077810857 | 3.014022787 |
| ENSG00000081248 | CACNA1S      | 0.077810857 | 3.014022787 |
| ENSG00000099812 | MISP         | 0.077810857 | 3.014022787 |
| ENSG00000104133 | SPG11        | 0.077810857 | 3.014022787 |
| ENSG00000126217 | MCF2L        | 0.077810857 | 3.014022787 |
| ENSG00000143341 | HMCN1        | 0.077810857 | 3.014022787 |
| ENSG00000146839 | ZAN          | 0.077810857 | 3.014022787 |
| ENSG00000162946 | DISC1        | 0.077810857 | 3.014022787 |
| ENSG00000174371 | EXO1         | 0.077810857 | 3.014022787 |
| ENSG00000183117 | CSMD1        | 0.077810857 | 3.014022787 |
| ENSG00000187908 | DMBT1        | 0.077810857 | 3.014022787 |
| ENSG00000198203 | SULT1C2      | 0.077810857 | 3.014022787 |
| ENSG00000254656 | RTL1         | 0.077810857 | 3.014022787 |
| ENSG00000107736 | CDH23        | 0.080807431 | 2.227793131 |
| ENSG00000107611 | CUBN         | 0.09219064  | 2.344913151 |
| ENSG00000021826 | CPS1         | 0.096273897 | 3.28742515  |
| ENSG00000049323 | LTBP1        | 0.096273897 | 3.28742515  |
| ENSG00000079435 | LIPE         | 0.096273897 | 3.28742515  |
| ENSG00000080345 | RIF1         | 0.096273897 | 3.28742515  |
| ENSG00000081026 | MAGI3        | 0.096273897 | 3.28742515  |
| ENSG00000083168 | KAT6A        | 0.096273897 | 3.28742515  |
| ENSG00000085840 | ORC1         | 0.096273897 | 3.28742515  |
| ENSG00000099821 | POLRMT       | 0.096273897 | 3.28742515  |
| ENSG00000101096 | NFATC2       | 0.096273897 | 3.28742515  |
| ENSG00000102804 | TSC22D1      | 0.096273897 | 3.28742515  |
| ENSG00000109061 | MYH1         | 0.096273897 | 3.28742515  |
| ENSG00000113048 | MRPS27       | 0.096273897 | 3.28742515  |
| ENSG00000115183 | TANC1        | 0.096273897 | 3.28742515  |
| ENSG00000117245 | KIF17        | 0.096273897 | 3.28742515  |
| ENSG00000123454 | DBH          | 0.096273897 | 3.28742515  |
| ENSG00000144962 | SPATA16      | 0.096273897 | 3.28742515  |
| ENSG00000149231 | CCDC82       | 0.096273897 | 3.28742515  |
| ENSG00000153404 | PLEKHG4B     | 0.096273897 | 3.28742515  |
| ENSG00000164050 | PLXNB1       | 0.096273897 | 3.28742515  |
| ENSG00000167210 | LOXHD1       | 0.096273897 | 3.28742515  |

|                 |            |             |             |
|-----------------|------------|-------------|-------------|
| ENSG00000174197 | MGA        | 0.096273897 | 3.28742515  |
| ENSG00000174776 | WDR49      | 0.096273897 | 3.28742515  |
| ENSG00000182077 | PTCHD3     | 0.096273897 | 3.28742515  |
| ENSG00000182557 | SPNS3      | 0.096273897 | 3.28742515  |
| ENSG00000186635 | ARAP1      | 0.096273897 | 3.28742515  |
| ENSG00000188710 | QRFP       | 0.096273897 | 3.28742515  |
| ENSG00000196557 | CACNA1H    | 0.096273897 | 3.28742515  |
| ENSG00000205667 | ARSH       | 0.096273897 | 3.28742515  |
| ENSG00000206474 | OR10C1     | 0.096273897 | 3.28742515  |
| ENSG00000237649 | KIFC1      | 0.096273897 | 3.28742515  |
| ENSG00000272514 | C6ORF165   | 0.096273897 | 3.28742515  |
| ENSG00000054219 | LY75       | 0.09991703  | 2.594202899 |
| ENSG00000117523 | PRRC2C     | 0.09991703  | 2.594202899 |
| ENSG00000134250 | NOTCH2     | 0.09991703  | 2.594202899 |
| ENSG00000142449 | FBN3       | 0.09991703  | 2.594202899 |
| ENSG00000154646 | TMPRSS15   | 0.09991703  | 2.594202899 |
| ENSG00000168014 | C2CD3      | 0.09991703  | 2.594202899 |
| ENSG00000168038 | ULK4       | 0.09991703  | 2.594202899 |
| ENSG00000188107 | EYS        | 0.09991703  | 2.594202899 |
| ENSG00000248672 | LY75-CD302 | 0.09991703  | 2.594202899 |
| ENSG00000006282 | SPATA20    | 0.113957593 | 3.966861598 |
| ENSG00000006788 | MYH13      | 0.113957593 | 3.966861598 |
| ENSG00000008226 | DLEC1      | 0.113957593 | 3.966861598 |
| ENSG00000011451 | WIZ        | 0.113957593 | 3.966861598 |
| ENSG00000015520 | NPC1L1     | 0.113957593 | 3.966861598 |
| ENSG00000041982 | TNC        | 0.113957593 | 3.966861598 |
| ENSG00000048140 | TSPAN17    | 0.113957593 | 3.966861598 |
| ENSG00000056998 | GYG2       | 0.113957593 | 3.966861598 |
| ENSG00000066455 | GOLGA5     | 0.113957593 | 3.966861598 |
| ENSG00000068724 | TTC7A      | 0.113957593 | 3.966861598 |
| ENSG00000072818 | ACAP1      | 0.113957593 | 3.966861598 |
| ENSG00000079313 | REXO1      | 0.113957593 | 3.966861598 |
| ENSG00000081052 | COL4A4     | 0.113957593 | 3.966861598 |
| ENSG00000088035 | ALG6       | 0.113957593 | 3.966861598 |
| ENSG00000088038 | CNOT3      | 0.113957593 | 3.966861598 |
| ENSG00000092054 | MYH7       | 0.113957593 | 3.966861598 |
| ENSG00000092929 | UNC13D     | 0.113957593 | 3.966861598 |
| ENSG00000094963 | FMO2       | 0.113957593 | 3.966861598 |
| ENSG00000099256 | PRTFDC1    | 0.113957593 | 3.966861598 |
| ENSG00000100345 | MYH9       | 0.113957593 | 3.966861598 |
| ENSG00000105711 | SCN1B      | 0.113957593 | 3.966861598 |
| ENSG00000105726 | ATP13A1    | 0.113957593 | 3.966861598 |
| ENSG00000106066 | CPVL       | 0.113957593 | 3.966861598 |
| ENSG00000107263 | RAPGEF1    | 0.113957593 | 3.966861598 |
| ENSG00000112659 | CUL9       | 0.113957593 | 3.966861598 |
| ENSG00000114026 | OGG1       | 0.113957593 | 3.966861598 |
| ENSG00000115267 | IFIH1      | 0.113957593 | 3.966861598 |

|                 |          |             |             |
|-----------------|----------|-------------|-------------|
| ENSG00000117114 | LPHN2    | 0.113957593 | 3.966861598 |
| ENSG00000117115 | PADI2    | 0.113957593 | 3.966861598 |
| ENSG00000118257 | NRP2     | 0.113957593 | 3.966861598 |
| ENSG00000119636 | CCDC176  | 0.113957593 | 3.966861598 |
| ENSG00000120685 | PROSER1  | 0.113957593 | 3.966861598 |
| ENSG00000122481 | RWDD3    | 0.113957593 | 3.966861598 |
| ENSG00000122779 | TRIM24   | 0.113957593 | 3.966861598 |
| ENSG00000124155 | PIGT     | 0.113957593 | 3.966861598 |
| ENSG00000124813 | RUNX2    | 0.113957593 | 3.966861598 |
| ENSG00000125247 | TMTC4    | 0.113957593 | 3.966861598 |
| ENSG00000127412 | TRPV5    | 0.113957593 | 3.966861598 |
| ENSG00000131969 | ABHD12B  | 0.113957593 | 3.966861598 |
| ENSG00000133195 | SLC39A11 | 0.113957593 | 3.966861598 |
| ENSG00000134160 | TRPM1    | 0.113957593 | 3.966861598 |
| ENSG00000134812 | GIF      | 0.113957593 | 3.966861598 |
| ENSG00000135048 | TMEM2    | 0.113957593 | 3.966861598 |
| ENSG00000135083 | CCNJL    | 0.113957593 | 3.966861598 |
| ENSG00000137675 | MMP27    | 0.113957593 | 3.966861598 |
| ENSG00000138161 | CUZD1    | 0.113957593 | 3.966861598 |
| ENSG00000138604 | GLCE     | 0.113957593 | 3.966861598 |
| ENSG00000138771 | SHROOM3  | 0.113957593 | 3.966861598 |
| ENSG00000141002 | TCF25    | 0.113957593 | 3.966861598 |
| ENSG00000142303 | ADAMTS10 | 0.113957593 | 3.966861598 |
| ENSG00000142949 | PTPRF    | 0.113957593 | 3.966861598 |
| ENSG00000143194 | MAEL     | 0.113957593 | 3.966861598 |
| ENSG00000145681 | HAPLN1   | 0.113957593 | 3.966861598 |
| ENSG00000145703 | IQGAP2   | 0.113957593 | 3.966861598 |
| ENSG00000146054 | TRIM7    | 0.113957593 | 3.966861598 |
| ENSG00000146166 | LGSN     | 0.113957593 | 3.966861598 |
| ENSG00000148606 | POLR3A   | 0.113957593 | 3.966861598 |
| ENSG00000149294 | NCAM1    | 0.113957593 | 3.966861598 |
| ENSG00000151320 | AKAP6    | 0.113957593 | 3.966861598 |
| ENSG00000152463 | OLAH     | 0.113957593 | 3.966861598 |
| ENSG00000153064 | BANK1    | 0.113957593 | 3.966861598 |
| ENSG00000156502 | SUPV3L1  | 0.113957593 | 3.966861598 |
| ENSG00000157617 | C2CD2    | 0.113957593 | 3.966861598 |
| ENSG00000158062 | UBXN11   | 0.113957593 | 3.966861598 |
| ENSG00000158859 | ADAMTS4  | 0.113957593 | 3.966861598 |
| ENSG00000159650 | UROC1    | 0.113957593 | 3.966861598 |
| ENSG00000159788 | RGS12    | 0.113957593 | 3.966861598 |
| ENSG00000160117 | ANKLE1   | 0.113957593 | 3.966861598 |
| ENSG00000162836 | ACP6     | 0.113957593 | 3.966861598 |
| ENSG00000163138 | PACRGL   | 0.113957593 | 3.966861598 |
| ENSG00000163975 | MFI2     | 0.113957593 | 3.966861598 |
| ENSG00000164220 | F2RL2    | 0.113957593 | 3.966861598 |
| ENSG00000164828 | SUN1     | 0.113957593 | 3.966861598 |
| ENSG00000166833 | NAV2     | 0.113957593 | 3.966861598 |

|                 |            |             |             |
|-----------------|------------|-------------|-------------|
| ENSG00000166947 | EPB42      | 0.113957593 | 3.966861598 |
| ENSG00000167104 | BPIFB6     | 0.113957593 | 3.966861598 |
| ENSG00000167291 | TBC1D16    | 0.113957593 | 3.966861598 |
| ENSG00000167775 | CD320      | 0.113957593 | 3.966861598 |
| ENSG00000171105 | INSR       | 0.113957593 | 3.966861598 |
| ENSG00000171680 | PLEKHG5    | 0.113957593 | 3.966861598 |
| ENSG00000172487 | OR8J1      | 0.113957593 | 3.966861598 |
| ENSG00000173421 | CCDC36     | 0.113957593 | 3.966861598 |
| ENSG00000173908 | KRT28      | 0.113957593 | 3.966861598 |
| ENSG00000173976 | RAX2       | 0.113957593 | 3.966861598 |
| ENSG00000177706 | FAM20C     | 0.113957593 | 3.966861598 |
| ENSG00000180176 | TH         | 0.113957593 | 3.966861598 |
| ENSG00000181355 | OFCC1      | 0.113957593 | 3.966861598 |
| ENSG00000181499 | OR6T1      | 0.113957593 | 3.966861598 |
| ENSG00000182319 | SGK223     | 0.113957593 | 3.966861598 |
| ENSG00000182326 | C1S        | 0.113957593 | 3.966861598 |
| ENSG00000183397 | C19orf71   | 0.113957593 | 3.966861598 |
| ENSG00000185518 | SV2B       | 0.113957593 | 3.966861598 |
| ENSG00000186714 | CCDC73     | 0.113957593 | 3.966861598 |
| ENSG00000187173 | LCE2A      | 0.113957593 | 3.966861598 |
| ENSG00000188779 | SKOR1      | 0.113957593 | 3.966861598 |
| ENSG00000196247 | ZNF107     | 0.113957593 | 3.966861598 |
| ENSG00000203780 | FANK1      | 0.113957593 | 3.966861598 |
| ENSG00000204022 | LIPJ       | 0.113957593 | 3.966861598 |
| ENSG00000205846 | CLEC6A     | 0.113957593 | 3.966861598 |
| ENSG00000205978 | NYNRIN     | 0.113957593 | 3.966861598 |
| ENSG00000211942 | IGHV3-13   | 0.113957593 | 3.966861598 |
| ENSG00000213889 | PPM1N      | 0.113957593 | 3.966861598 |
| ENSG00000214248 | AC010336.1 | 0.113957593 | 3.966861598 |
| ENSG00000214415 | GNAT3      | 0.113957593 | 3.966861598 |
| ENSG00000244486 | SCARF2     | 0.113957593 | 3.966861598 |
| ENSG00000253873 | PCDHGA11   | 0.113957593 | 3.966861598 |
| ENSG00000256436 | TAS2R31    | 0.113957593 | 3.966861598 |
| ENSG00000258659 | TRIM34     | 0.113957593 | 3.966861598 |
| ENSG00000001631 | KRIT1      | 0.116926819 | 7.48        |
| ENSG00000004766 | CCDC132    | 0.116926819 | 7.48        |
| ENSG00000007129 | CEACAM21   | 0.116926819 | 7.48        |
| ENSG00000008513 | ST3GAL1    | 0.116926819 | 7.48        |
| ENSG00000009765 | IYD        | 0.116926819 | 7.48        |
| ENSG00000010030 | ETV7       | 0.116926819 | 7.48        |
| ENSG00000013364 | MVP        | 0.116926819 | 7.48        |
| ENSG00000013523 | ANGEL1     | 0.116926819 | 7.48        |
| ENSG00000019485 | PRDM11     | 0.116926819 | 7.48        |
| ENSG00000024422 | EHD2       | 0.116926819 | 7.48        |
| ENSG00000028116 | VRK2       | 0.116926819 | 7.48        |
| ENSG00000030066 | NUP160     | 0.116926819 | 7.48        |
| ENSG00000033122 | LRRC7      | 0.116926819 | 7.48        |

|                 |          |             |      |
|-----------------|----------|-------------|------|
| ENSG00000035664 | DAPK2    | 0.116926819 | 7.48 |
| ENSG00000040933 | INPP4A   | 0.116926819 | 7.48 |
| ENSG00000042493 | CAPG     | 0.116926819 | 7.48 |
| ENSG00000053702 | NRIP2    | 0.116926819 | 7.48 |
| ENSG00000064102 | ASUN     | 0.116926819 | 7.48 |
| ENSG00000064313 | TAF2     | 0.116926819 | 7.48 |
| ENSG00000065613 | SLK      | 0.116926819 | 7.48 |
| ENSG00000065618 | COL17A1  | 0.116926819 | 7.48 |
| ENSG00000067606 | PRKCZ    | 0.116926819 | 7.48 |
| ENSG00000069122 | GPR116   | 0.116926819 | 7.48 |
| ENSG00000071967 | CYBRD1   | 0.116926819 | 7.48 |
| ENSG00000075651 | PLD1     | 0.116926819 | 7.48 |
| ENSG00000076924 | XAB2     | 0.116926819 | 7.48 |
| ENSG00000080298 | RFX3     | 0.116926819 | 7.48 |
| ENSG00000082684 | SEMA5B   | 0.116926819 | 7.48 |
| ENSG00000083067 | TRPM3    | 0.116926819 | 7.48 |
| ENSG00000084628 | NKAIN1   | 0.116926819 | 7.48 |
| ENSG00000086696 | HSD17B2  | 0.116926819 | 7.48 |
| ENSG00000087116 | ADAMTS2  | 0.116926819 | 7.48 |
| ENSG00000087266 | SH3BP2   | 0.116926819 | 7.48 |
| ENSG00000087589 | CASS4    | 0.116926819 | 7.48 |
| ENSG00000089692 | LAG3     | 0.116926819 | 7.48 |
| ENSG00000090989 | EXOC1    | 0.116926819 | 7.48 |
| ENSG00000092529 | CAPN3    | 0.116926819 | 7.48 |
| ENSG00000100897 | DCAF11   | 0.116926819 | 7.48 |
| ENSG00000101160 | CTSZ     | 0.116926819 | 7.48 |
| ENSG00000101222 | SPEF1    | 0.116926819 | 7.48 |
| ENSG00000103381 | CPPED1   | 0.116926819 | 7.48 |
| ENSG00000103546 | SLC6A2   | 0.116926819 | 7.48 |
| ENSG00000104870 | FCGRT    | 0.116926819 | 7.48 |
| ENSG00000104979 | C19orf53 | 0.116926819 | 7.48 |
| ENSG00000105419 | MEIS3    | 0.116926819 | 7.48 |
| ENSG00000105609 | LILRB5   | 0.116926819 | 7.48 |
| ENSG00000105875 | WDR91    | 0.116926819 | 7.48 |
| ENSG00000106034 | CPED1    | 0.116926819 | 7.48 |
| ENSG00000108733 | PEX12    | 0.116926819 | 7.48 |
| ENSG00000109501 | WFS1     | 0.116926819 | 7.48 |
| ENSG00000109689 | STIM2    | 0.116926819 | 7.48 |
| ENSG00000109705 | NKX3-2   | 0.116926819 | 7.48 |
| ENSG00000110328 | GALNT18  | 0.116926819 | 7.48 |
| ENSG00000111291 | GPRC5D   | 0.116926819 | 7.48 |
| ENSG00000111817 | DSE      | 0.116926819 | 7.48 |
| ENSG00000111859 | NEDD9    | 0.116926819 | 7.48 |
| ENSG00000112769 | LAMA4    | 0.116926819 | 7.48 |
| ENSG00000112782 | CLIC5    | 0.116926819 | 7.48 |
| ENSG00000113368 | LMNB1    | 0.116926819 | 7.48 |
| ENSG00000114656 | KIAA1257 | 0.116926819 | 7.48 |

|                 |          |             |      |
|-----------------|----------|-------------|------|
| ENSG00000114933 | INO80D   | 0.116926819 | 7.48 |
| ENSG00000115221 | ITGB6    | 0.116926819 | 7.48 |
| ENSG00000116698 | SMG7     | 0.116926819 | 7.48 |
| ENSG00000118526 | TCF21    | 0.116926819 | 7.48 |
| ENSG00000119523 | ALG2     | 0.116926819 | 7.48 |
| ENSG00000120669 | SOHLH2   | 0.116926819 | 7.48 |
| ENSG00000121406 | ZNF549   | 0.116926819 | 7.48 |
| ENSG00000121413 | ZSCAN18  | 0.116926819 | 7.48 |
| ENSG00000122126 | OCRL     | 0.116926819 | 7.48 |
| ENSG00000122711 | SPINK4   | 0.116926819 | 7.48 |
| ENSG00000122729 | ACO1     | 0.116926819 | 7.48 |
| ENSG00000123411 | IKZF4    | 0.116926819 | 7.48 |
| ENSG00000124701 | APOBEC2  | 0.116926819 | 7.48 |
| ENSG00000124818 | OPN5     | 0.116926819 | 7.48 |
| ENSG00000125485 | DDX31    | 0.116926819 | 7.48 |
| ENSG00000126860 | EVI2A    | 0.116926819 | 7.48 |
| ENSG00000126883 | NUP214   | 0.116926819 | 7.48 |
| ENSG00000127529 | OR7C2    | 0.116926819 | 7.48 |
| ENSG00000130164 | LDLR     | 0.116926819 | 7.48 |
| ENSG00000130304 | SLC27A1  | 0.116926819 | 7.48 |
| ENSG00000130701 | RBBP8NL  | 0.116926819 | 7.48 |
| ENSG00000131370 | SH3BP5   | 0.116926819 | 7.48 |
| ENSG00000131871 | VIMP     | 0.116926819 | 7.48 |
| ENSG00000133424 | LARGE    | 0.116926819 | 7.48 |
| ENSG00000133835 | HSD17B4  | 0.116926819 | 7.48 |
| ENSG00000134153 | EMC7     | 0.116926819 | 7.48 |
| ENSG00000134294 | SLC38A2  | 0.116926819 | 7.48 |
| ENSG00000135205 | CCDC146  | 0.116926819 | 7.48 |
| ENSG00000135312 | HTR1B    | 0.116926819 | 7.48 |
| ENSG00000135502 | SLC26A10 | 0.116926819 | 7.48 |
| ENSG00000136824 | SMC2     | 0.116926819 | 7.48 |
| ENSG00000137074 | APTX     | 0.116926819 | 7.48 |
| ENSG00000137124 | ALDH1B1  | 0.116926819 | 7.48 |
| ENSG00000137251 | TINAG    | 0.116926819 | 7.48 |
| ENSG00000137338 | PGBD1    | 0.116926819 | 7.48 |
| ENSG00000137821 | LRRC49   | 0.116926819 | 7.48 |
| ENSG00000138115 | CYP2C8   | 0.116926819 | 7.48 |
| ENSG00000138650 | PCDH10   | 0.116926819 | 7.48 |
| ENSG00000139531 | SUOX     | 0.116926819 | 7.48 |
| ENSG00000140009 | ESR2     | 0.116926819 | 7.48 |
| ENSG00000142002 | DPP9     | 0.116926819 | 7.48 |
| ENSG00000142621 | FHAD1    | 0.116926819 | 7.48 |
| ENSG00000142920 | ADC      | 0.116926819 | 7.48 |
| ENSG00000142945 | KIF2C    | 0.116926819 | 7.48 |
| ENSG00000143493 | INTS7    | 0.116926819 | 7.48 |
| ENSG00000143630 | HCN3     | 0.116926819 | 7.48 |
| ENSG00000143891 | GALM     | 0.116926819 | 7.48 |

|                 |              |             |      |
|-----------------|--------------|-------------|------|
| ENSG00000144649 | FAM198A      | 0.116926819 | 7.48 |
| ENSG00000146373 | RNF217       | 0.116926819 | 7.48 |
| ENSG00000146950 | SHROOM2      | 0.116926819 | 7.48 |
| ENSG00000147874 | HAUS6        | 0.116926819 | 7.48 |
| ENSG00000150510 | FAM124A      | 0.116926819 | 7.48 |
| ENSG00000152503 | TRIM36       | 0.116926819 | 7.48 |
| ENSG00000153015 | CWC27        | 0.116926819 | 7.48 |
| ENSG00000153714 | LURAP1L      | 0.116926819 | 7.48 |
| ENSG00000154548 | SRSF12       | 0.116926819 | 7.48 |
| ENSG00000156313 | RPGR         | 0.116926819 | 7.48 |
| ENSG00000157450 | RNF111       | 0.116926819 | 7.48 |
| ENSG00000157890 | MEGF11       | 0.116926819 | 7.48 |
| ENSG00000158828 | PINK1        | 0.116926819 | 7.48 |
| ENSG00000159527 | PGLYRP3      | 0.116926819 | 7.48 |
| ENSG00000159915 | ZNF233       | 0.116926819 | 7.48 |
| ENSG00000160208 | RRP1B        | 0.116926819 | 7.48 |
| ENSG00000160293 | VAV2         | 0.116926819 | 7.48 |
| ENSG00000160883 | HK3          | 0.116926819 | 7.48 |
| ENSG00000160961 | ZNF333       | 0.116926819 | 7.48 |
| ENSG00000162510 | MATN1        | 0.116926819 | 7.48 |
| ENSG00000162594 | IL23R        | 0.116926819 | 7.48 |
| ENSG00000162654 | GBP4         | 0.116926819 | 7.48 |
| ENSG00000162804 | SNED1        | 0.116926819 | 7.48 |
| ENSG00000162882 | HAAO         | 0.116926819 | 7.48 |
| ENSG00000163346 | PBXIP1       | 0.116926819 | 7.48 |
| ENSG00000163781 | TOPBP1       | 0.116926819 | 7.48 |
| ENSG00000164048 | ZNF589       | 0.116926819 | 7.48 |
| ENSG00000164070 | HSPA4L       | 0.116926819 | 7.48 |
| ENSG00000164385 | C6orf195     | 0.116926819 | 7.48 |
| ENSG00000165606 | DRGX         | 0.116926819 | 7.48 |
| ENSG00000165995 | CACNB2       | 0.116926819 | 7.48 |
| ENSG00000166049 | PASD1        | 0.116926819 | 7.48 |
| ENSG00000166104 | hsa-mir-7162 | 0.116926819 | 7.48 |
| ENSG00000166105 | GLB1L3       | 0.116926819 | 7.48 |
| ENSG00000166265 | CYR1         | 0.116926819 | 7.48 |
| ENSG00000166340 | TPP1         | 0.116926819 | 7.48 |
| ENSG00000167862 | ICT1         | 0.116926819 | 7.48 |
| ENSG00000168060 | NAALADL1     | 0.116926819 | 7.48 |
| ENSG00000169410 | PTPN9        | 0.116926819 | 7.48 |
| ENSG00000169896 | ITGAM        | 0.116926819 | 7.48 |
| ENSG00000170832 | USP32        | 0.116926819 | 7.48 |
| ENSG00000171132 | PRKCE        | 0.116926819 | 7.48 |
| ENSG00000171551 | ECEL1        | 0.116926819 | 7.48 |
| ENSG00000171735 | CAMTA1       | 0.116926819 | 7.48 |
| ENSG00000171777 | RASGRP4      | 0.116926819 | 7.48 |
| ENSG00000172053 | QARS         | 0.116926819 | 7.48 |
| ENSG00000172339 | ALG14        | 0.116926819 | 7.48 |

|                 |              |             |      |
|-----------------|--------------|-------------|------|
| ENSG00000172725 | CORO1B       | 0.116926819 | 7.48 |
| ENSG00000173040 | EVC2         | 0.116926819 | 7.48 |
| ENSG00000173627 | APOBEC4      | 0.116926819 | 7.48 |
| ENSG00000174156 | GSTA3        | 0.116926819 | 7.48 |
| ENSG00000174306 | ZHX3         | 0.116926819 | 7.48 |
| ENSG00000174325 | DIRC1        | 0.116926819 | 7.48 |
| ENSG00000175857 | GAPT         | 0.116926819 | 7.48 |
| ENSG00000176393 | RNPEP        | 0.116926819 | 7.48 |
| ENSG00000176399 | DMRTA1       | 0.116926819 | 7.48 |
| ENSG00000176566 | DCAF4L2      | 0.116926819 | 7.48 |
| ENSG00000176925 | OR51F2       | 0.116926819 | 7.48 |
| ENSG00000177666 | PNPLA2       | 0.116926819 | 7.48 |
| ENSG00000178295 | GEN1         | 0.116926819 | 7.48 |
| ENSG00000178685 | PARP10       | 0.116926819 | 7.48 |
| ENSG00000178694 | NSUN3        | 0.116926819 | 7.48 |
| ENSG00000179409 | GEMIN4       | 0.116926819 | 7.48 |
| ENSG00000180245 | RRH          | 0.116926819 | 7.48 |
| ENSG00000181322 | NME9         | 0.116926819 | 7.48 |
| ENSG00000181562 | EDDM3A       | 0.116926819 | 7.48 |
| ENSG00000183304 | FAM9A        | 0.116926819 | 7.48 |
| ENSG00000183621 | ZNF438       | 0.116926819 | 7.48 |
| ENSG00000183808 | RBM12B       | 0.116926819 | 7.48 |
| ENSG00000184825 | HIST1H2AH    | 0.116926819 | 7.48 |
| ENSG00000184995 | IFNE         | 0.116926819 | 7.48 |
| ENSG00000185133 | INPP5J       | 0.116926819 | 7.48 |
| ENSG00000185681 | MORN5        | 0.116926819 | 7.48 |
| ENSG00000186143 | C2orf53      | 0.116926819 | 7.48 |
| ENSG00000186222 | BLOC1S4      | 0.116926819 | 7.48 |
| ENSG00000187266 | EPOR         | 0.116926819 | 7.48 |
| ENSG00000187695 | RP11-723O4.6 | 0.116926819 | 7.48 |
| ENSG00000188257 | PLA2G2A      | 0.116926819 | 7.48 |
| ENSG00000189042 | ZNF567       | 0.116926819 | 7.48 |
| ENSG00000189319 | FAM53B       | 0.116926819 | 7.48 |
| ENSG00000196152 | ZNF79        | 0.116926819 | 7.48 |
| ENSG00000196616 | ADH1B        | 0.116926819 | 7.48 |
| ENSG00000197302 | ZNF720       | 0.116926819 | 7.48 |
| ENSG00000197479 | PCDHB11      | 0.116926819 | 7.48 |
| ENSG00000197818 | SLC9A8       | 0.116926819 | 7.48 |
| ENSG00000197971 | MBP          | 0.116926819 | 7.48 |
| ENSG00000198515 | CNGA1        | 0.116926819 | 7.48 |
| ENSG00000198732 | SMOC1        | 0.116926819 | 7.48 |
| ENSG00000198883 | PNMA5        | 0.116926819 | 7.48 |
| ENSG00000203485 | INF2         | 0.116926819 | 7.48 |
| ENSG00000203663 | OR2L2        | 0.116926819 | 7.48 |
| ENSG00000203778 | FAM229B      | 0.116926819 | 7.48 |
| ENSG00000204315 | FKBPL        | 0.116926819 | 7.48 |
| ENSG00000204704 | OR2W1        | 0.116926819 | 7.48 |

|                 |                |             |             |
|-----------------|----------------|-------------|-------------|
| ENSG00000205274 | TRBV20OR9-2    | 0.116926819 | 7.48        |
| ENSG00000205359 | SLCO6A1        | 0.116926819 | 7.48        |
| ENSG00000206538 | VGLL3          | 0.116926819 | 7.48        |
| ENSG00000211734 | TRBV5-1        | 0.116926819 | 7.48        |
| ENSG00000213145 | CRIP1          | 0.116926819 | 7.48        |
| ENSG00000213171 | LINGO4         | 0.116926819 | 7.48        |
| ENSG00000213445 | SIPA1          | 0.116926819 | 7.48        |
| ENSG00000217442 | SYCE3          | 0.116926819 | 7.48        |
| ENSG00000221813 | OR6B1          | 0.116926819 | 7.48        |
| ENSG00000232268 | OR52I1         | 0.116926819 | 7.48        |
| ENSG00000244242 | IFITM10        | 0.116926819 | 7.48        |
| ENSG00000250709 | CCDC169-SOHLH2 | 0.116926819 | 7.48        |
| ENSG00000256061 | DYX1C1         | 0.116926819 | 7.48        |
| ENSG00000257093 | KIAA1147       | 0.116926819 | 7.48        |
| ENSG00000259384 | GH1            | 0.116926819 | 7.48        |
| ENSG00000267534 | S1PR2          | 0.116926819 | 7.48        |
| ENSG00000272790 | AP002884.3     | 0.116926819 | 7.48        |
| ENSG00000134871 | COL4A2         | 0.118144088 | 0.225612376 |
| ENSG00000129988 | LBP            | 0.120909679 | 2.32761578  |
| ENSG00000168702 | LRP1B          | 0.120909679 | 2.32761578  |
| ENSG00000035928 | RFC1           | 0.121092113 | 0.109883364 |
| ENSG00000054267 | ARID4B         | 0.121092113 | 0.109883364 |
| ENSG00000089154 | GCN1L1         | 0.121092113 | 0.109883364 |
| ENSG00000100242 | SUN2           | 0.121092113 | 0.109883364 |
| ENSG00000104804 | TULP2          | 0.121092113 | 0.109883364 |
| ENSG00000111181 | SLC6A12        | 0.121092113 | 0.109883364 |
| ENSG00000124789 | NUP153         | 0.121092113 | 0.109883364 |
| ENSG00000138336 | TET1           | 0.121092113 | 0.109883364 |
| ENSG00000145016 | KIAA0226       | 0.121092113 | 0.109883364 |
| ENSG00000151348 | EXT2           | 0.121092113 | 0.109883364 |
| ENSG00000157077 | ZFYVE9         | 0.121092113 | 0.109883364 |
| ENSG00000169067 | ACTBL2         | 0.121092113 | 0.109883364 |
| ENSG00000178772 | CPN2           | 0.121092113 | 0.109883364 |
| ENSG00000185156 | MFSD6L         | 0.121092113 | 0.109883364 |
| ENSG00000196074 | SYCP2          | 0.121092113 | 0.109883364 |
| ENSG00000009413 | REV3L          | 0.128706716 | 2.664069264 |
| ENSG00000023287 | RB1CC1         | 0.128706716 | 2.664069264 |
| ENSG00000044459 | CNTLN          | 0.128706716 | 2.664069264 |
| ENSG00000060718 | COL11A1        | 0.128706716 | 2.664069264 |
| ENSG00000116127 | ALMS1          | 0.128706716 | 2.664069264 |
| ENSG00000132911 | NMUR2          | 0.128706716 | 2.664069264 |
| ENSG00000141141 | DDX52          | 0.128706716 | 2.664069264 |
| ENSG00000145555 | MYO10          | 0.128706716 | 2.664069264 |
| ENSG00000156535 | CD109          | 0.128706716 | 2.664069264 |
| ENSG00000171811 | TTC40          | 0.128706716 | 2.664069264 |
| ENSG00000157423 | HYDIN          | 0.133754048 | 1.969975274 |
| ENSG00000187775 | DNAH17         | 0.140605476 | 2.14355708  |

|                 |         |             |             |
|-----------------|---------|-------------|-------------|
| ENSG00000100815 | TRIP11  | 0.158327294 | 2.318336742 |
| ENSG00000122194 | PLG     | 0.158327294 | 2.318336742 |
| ENSG00000131697 | NPHP4   | 0.158327294 | 2.318336742 |
| ENSG00000133454 | MYO18B  | 0.158327294 | 2.318336742 |
| ENSG00000149311 | ATM     | 0.158327294 | 2.318336742 |
| ENSG00000165899 | OTOGL   | 0.158327294 | 2.318336742 |
| ENSG00000138759 | FRAS1   | 0.158967505 | 2.009032258 |
| ENSG00000006715 | VPS41   | 0.164357208 | 2.815384615 |
| ENSG00000006837 | CDKL3   | 0.164357208 | 2.815384615 |
| ENSG00000007968 | E2F2    | 0.164357208 | 2.815384615 |
| ENSG00000010282 | HHATL   | 0.164357208 | 2.815384615 |
| ENSG00000015133 | CCDC88C | 0.164357208 | 2.815384615 |
| ENSG00000038427 | VCAN    | 0.164357208 | 2.815384615 |
| ENSG00000069248 | NUP133  | 0.164357208 | 2.815384615 |
| ENSG00000074527 | NTN4    | 0.164357208 | 2.815384615 |
| ENSG00000077943 | ITGA8   | 0.164357208 | 2.815384615 |
| ENSG00000089199 | CHGB    | 0.164357208 | 2.815384615 |
| ENSG00000099991 | CABIN1  | 0.164357208 | 2.815384615 |
| ENSG00000101255 | TRIB3   | 0.164357208 | 2.815384615 |
| ENSG00000104760 | FGL1    | 0.164357208 | 2.815384615 |
| ENSG00000105357 | MYH14   | 0.164357208 | 2.815384615 |
| ENSG00000106125 | FAM188B | 0.164357208 | 2.815384615 |
| ENSG00000107618 | RBP3    | 0.164357208 | 2.815384615 |
| ENSG00000108821 | COL1A1  | 0.164357208 | 2.815384615 |
| ENSG00000108963 | DPH1    | 0.164357208 | 2.815384615 |
| ENSG00000112365 | ZBTB24  | 0.164357208 | 2.815384615 |
| ENSG00000114200 | BCHE    | 0.164357208 | 2.815384615 |
| ENSG00000115828 | QPCT    | 0.164357208 | 2.815384615 |
| ENSG00000124788 | ATXN1   | 0.164357208 | 2.815384615 |
| ENSG00000128908 | INO80   | 0.164357208 | 2.815384615 |
| ENSG00000130856 | ZNF236  | 0.164357208 | 2.815384615 |
| ENSG00000133958 | UNC79   | 0.164357208 | 2.815384615 |
| ENSG00000138892 | TTLL8   | 0.164357208 | 2.815384615 |
| ENSG00000140323 | DISP2   | 0.164357208 | 2.815384615 |
| ENSG00000140534 | TICRR   | 0.164357208 | 2.815384615 |
| ENSG00000141527 | CARD14  | 0.164357208 | 2.815384615 |
| ENSG00000141994 | DUS3L   | 0.164357208 | 2.815384615 |
| ENSG00000148180 | GSN     | 0.164357208 | 2.815384615 |
| ENSG00000154133 | ROBO4   | 0.164357208 | 2.815384615 |
| ENSG00000154143 | PANX3   | 0.164357208 | 2.815384615 |
| ENSG00000154997 | SEPT14  | 0.164357208 | 2.815384615 |
| ENSG00000155761 | SPAG17  | 0.164357208 | 2.815384615 |
| ENSG00000159069 | FBXW5   | 0.164357208 | 2.815384615 |
| ENSG00000159140 | SON     | 0.164357208 | 2.815384615 |
| ENSG00000164266 | SPINK1  | 0.164357208 | 2.815384615 |
| ENSG00000164818 | HEATR2  | 0.164357208 | 2.815384615 |
| ENSG00000164946 | FREM1   | 0.164357208 | 2.815384615 |

|                 |           |             |             |
|-----------------|-----------|-------------|-------------|
| ENSG00000165953 | SERPINA12 | 0.164357208 | 2.815384615 |
| ENSG00000167094 | TTC16     | 0.164357208 | 2.815384615 |
| ENSG00000167207 | NOD2      | 0.164357208 | 2.815384615 |
| ENSG00000167395 | ZNF646    | 0.164357208 | 2.815384615 |
| ENSG00000167984 | NLRC3     | 0.164357208 | 2.815384615 |
| ENSG00000168061 | SAC3D1    | 0.164357208 | 2.815384615 |
| ENSG00000168769 | TET2      | 0.164357208 | 2.815384615 |
| ENSG00000168787 | OR12D2    | 0.164357208 | 2.815384615 |
| ENSG00000169208 | OR10G3    | 0.164357208 | 2.815384615 |
| ENSG00000175445 | LPL       | 0.164357208 | 2.815384615 |
| ENSG00000175820 | CCDC168   | 0.164357208 | 2.815384615 |
| ENSG00000179041 | RRS1      | 0.164357208 | 2.815384615 |
| ENSG00000180264 | GPR144    | 0.164357208 | 2.815384615 |
| ENSG00000184611 | KCNH7     | 0.164357208 | 2.815384615 |
| ENSG00000185823 | NPAP1     | 0.164357208 | 2.815384615 |
| ENSG00000188549 | C15orf52  | 0.164357208 | 2.815384615 |
| ENSG00000189241 | TSPYL1    | 0.164357208 | 2.815384615 |
| ENSG00000197321 | SVIL      | 0.164357208 | 2.815384615 |
| ENSG00000197417 | SHPK      | 0.164357208 | 2.815384615 |
| ENSG00000197915 | HRNR      | 0.164357208 | 2.815384615 |
| ENSG00000198483 | ANKRD35   | 0.164357208 | 2.815384615 |
| ENSG00000204740 | MALRD1    | 0.164357208 | 2.815384615 |
| ENSG00000206530 | WDR52     | 0.164357208 | 2.815384615 |
| ENSG00000221947 | XKR9      | 0.164357208 | 2.815384615 |
| ENSG00000226650 | KIF4B     | 0.164357208 | 2.815384615 |
| ENSG00000243649 | CFB       | 0.164357208 | 2.815384615 |
| ENSG00000244255 | CFB       | 0.164357208 | 2.815384615 |
| ENSG00000115155 | OTOF      | 0.169322355 | 0.325800377 |
| ENSG00000119285 | HEATR1    | 0.18513644  | 2.098814229 |
| ENSG00000159433 | STARD9    | 0.18513644  | 2.098814229 |
| ENSG00000166748 | AGBL1     | 0.18513644  | 2.098814229 |
| ENSG00000186976 | EFCAB6    | 0.18513644  | 2.098814229 |
| ENSG00000142798 | HSPG2     | 0.191865922 | 1.826071802 |
| ENSG00000002822 | MAD1L1    | 0.206072384 | 3.208092486 |
| ENSG00000006114 | SYNRG     | 0.206072384 | 3.208092486 |
| ENSG00000010292 | NCAPD2    | 0.206072384 | 3.208092486 |
| ENSG00000023041 | ZDHC6     | 0.206072384 | 3.208092486 |
| ENSG00000026508 | CD44      | 0.206072384 | 3.208092486 |
| ENSG00000030419 | IKZF2     | 0.206072384 | 3.208092486 |
| ENSG00000033011 | ALG1      | 0.206072384 | 3.208092486 |
| ENSG00000033030 | ZCCHC8    | 0.206072384 | 3.208092486 |
| ENSG00000042062 | FAM65C    | 0.206072384 | 3.208092486 |
| ENSG00000050820 | BCAR1     | 0.206072384 | 3.208092486 |
| ENSG00000058056 | USP13     | 0.206072384 | 3.208092486 |
| ENSG00000061987 | MON2      | 0.206072384 | 3.208092486 |
| ENSG00000070047 | PHRF1     | 0.206072384 | 3.208092486 |
| ENSG00000073614 | KDM5A     | 0.206072384 | 3.208092486 |

|                 |          |             |             |
|-----------------|----------|-------------|-------------|
| ENSG00000077616 | NAALAD2  | 0.206072384 | 3.208092486 |
| ENSG00000083097 | DOPEY1   | 0.206072384 | 3.208092486 |
| ENSG00000085871 | MGST2    | 0.206072384 | 3.208092486 |
| ENSG00000085999 | RAD54L   | 0.206072384 | 3.208092486 |
| ENSG00000086848 | ALG9     | 0.206072384 | 3.208092486 |
| ENSG00000099968 | BCL2L13  | 0.206072384 | 3.208092486 |
| ENSG00000100304 | TTLL12   | 0.206072384 | 3.208092486 |
| ENSG00000100629 | CEP128   | 0.206072384 | 3.208092486 |
| ENSG00000101955 | SRPX     | 0.206072384 | 3.208092486 |
| ENSG00000102901 | CENPT    | 0.206072384 | 3.208092486 |
| ENSG00000105298 | CACTIN   | 0.206072384 | 3.208092486 |
| ENSG00000105379 | ETFB     | 0.206072384 | 3.208092486 |
| ENSG00000105479 | CCDC114  | 0.206072384 | 3.208092486 |
| ENSG00000105699 | LSR      | 0.206072384 | 3.208092486 |
| ENSG00000105852 | PON3     | 0.206072384 | 3.208092486 |
| ENSG00000106302 | HYAL4    | 0.206072384 | 3.208092486 |
| ENSG00000107738 | C10orf54 | 0.206072384 | 3.208092486 |
| ENSG00000107771 | CCSER2   | 0.206072384 | 3.208092486 |
| ENSG00000108256 | NUFIP2   | 0.206072384 | 3.208092486 |
| ENSG00000108370 | RGS9     | 0.206072384 | 3.208092486 |
| ENSG00000108700 | CCL8     | 0.206072384 | 3.208092486 |
| ENSG00000109762 | SNX25    | 0.206072384 | 3.208092486 |
| ENSG00000110925 | CSRNP2   | 0.206072384 | 3.208092486 |
| ENSG00000111199 | TRPV4    | 0.206072384 | 3.208092486 |
| ENSG00000111341 | MGP      | 0.206072384 | 3.208092486 |
| ENSG00000111452 | GPR133   | 0.206072384 | 3.208092486 |
| ENSG00000111700 | SLCO1B3  | 0.206072384 | 3.208092486 |
| ENSG00000111845 | PAK1IP1  | 0.206072384 | 3.208092486 |
| ENSG00000112293 | GPLD1    | 0.206072384 | 3.208092486 |
| ENSG00000112578 | BYSL     | 0.206072384 | 3.208092486 |
| ENSG00000114023 | FAM162A  | 0.206072384 | 3.208092486 |
| ENSG00000114541 | FRMD4B   | 0.206072384 | 3.208092486 |
| ENSG00000114698 | PLSCR4   | 0.206072384 | 3.208092486 |
| ENSG00000115271 | GCA      | 0.206072384 | 3.208092486 |
| ENSG00000115825 | PRKD3    | 0.206072384 | 3.208092486 |
| ENSG00000115840 | SLC25A12 | 0.206072384 | 3.208092486 |
| ENSG00000116032 | GRIN3B   | 0.206072384 | 3.208092486 |
| ENSG00000116885 | OSCP1    | 0.206072384 | 3.208092486 |
| ENSG00000117395 | EBNA1BP2 | 0.206072384 | 3.208092486 |
| ENSG00000117507 | FMO6P    | 0.206072384 | 3.208092486 |
| ENSG00000117601 | SERPINC1 | 0.206072384 | 3.208092486 |
| ENSG00000118094 | TREH     | 0.206072384 | 3.208092486 |
| ENSG00000118197 | DDX59    | 0.206072384 | 3.208092486 |
| ENSG00000119685 | TTLL5    | 0.206072384 | 3.208092486 |
| ENSG00000120440 | TTLL2    | 0.206072384 | 3.208092486 |
| ENSG00000120647 | CCDC77   | 0.206072384 | 3.208092486 |
| ENSG00000120868 | APAF1    | 0.206072384 | 3.208092486 |

|                 |          |             |             |
|-----------------|----------|-------------|-------------|
| ENSG00000121957 | GPSM2    | 0.206072384 | 3.208092486 |
| ENSG00000124217 | MOCS3    | 0.206072384 | 3.208092486 |
| ENSG00000124508 | BTN2A2   | 0.206072384 | 3.208092486 |
| ENSG00000124608 | AARS2    | 0.206072384 | 3.208092486 |
| ENSG00000125850 | OVOL2    | 0.206072384 | 3.208092486 |
| ENSG00000127831 | VIL1     | 0.206072384 | 3.208092486 |
| ENSG00000128346 | C22orf23 | 0.206072384 | 3.208092486 |
| ENSG00000128536 | CDHR3    | 0.206072384 | 3.208092486 |
| ENSG00000128815 | WDFY4    | 0.206072384 | 3.208092486 |
| ENSG00000128973 | CLN6     | 0.206072384 | 3.208092486 |
| ENSG00000129116 | PALLD    | 0.206072384 | 3.208092486 |
| ENSG00000130254 | SAFB2    | 0.206072384 | 3.208092486 |
| ENSG00000130684 | ZNF337   | 0.206072384 | 3.208092486 |
| ENSG00000130734 | ATG4D    | 0.206072384 | 3.208092486 |
| ENSG00000131873 | CHSY1    | 0.206072384 | 3.208092486 |
| ENSG00000132000 | PODNL1   | 0.206072384 | 3.208092486 |
| ENSG00000132031 | MATN3    | 0.206072384 | 3.208092486 |
| ENSG00000132141 | CCT6B    | 0.206072384 | 3.208092486 |
| ENSG00000132640 | BTBD3    | 0.206072384 | 3.208092486 |
| ENSG00000132952 | USPL1    | 0.206072384 | 3.208092486 |
| ENSG00000134757 | DSG3     | 0.206072384 | 3.208092486 |
| ENSG00000134899 | ERCC5    | 0.206072384 | 3.208092486 |
| ENSG00000135299 | ANKRD6   | 0.206072384 | 3.208092486 |
| ENSG00000135355 | GJA10    | 0.206072384 | 3.208092486 |
| ENSG00000135905 | DOCK10   | 0.206072384 | 3.208092486 |
| ENSG00000136205 | TNS3     | 0.206072384 | 3.208092486 |
| ENSG00000136478 | TEX2     | 0.206072384 | 3.208092486 |
| ENSG00000137033 | IL33     | 0.206072384 | 3.208092486 |
| ENSG00000137218 | FRS3     | 0.206072384 | 3.208092486 |
| ENSG00000137766 | UNC13C   | 0.206072384 | 3.208092486 |
| ENSG00000138036 | DYNC2LI1 | 0.206072384 | 3.208092486 |
| ENSG00000138375 | SMARCAL1 | 0.206072384 | 3.208092486 |
| ENSG00000138639 | ARHGAP24 | 0.206072384 | 3.208092486 |
| ENSG00000138698 | RAP1GDS1 | 0.206072384 | 3.208092486 |
| ENSG00000140153 | WDR20    | 0.206072384 | 3.208092486 |
| ENSG00000140563 | MCTP2    | 0.206072384 | 3.208092486 |
| ENSG00000140798 | ABCC12   | 0.206072384 | 3.208092486 |
| ENSG00000140939 | NOL3     | 0.206072384 | 3.208092486 |
| ENSG00000141441 | GAREM    | 0.206072384 | 3.208092486 |
| ENSG00000141971 | MVB12A   | 0.206072384 | 3.208092486 |
| ENSG00000142207 | URB1     | 0.206072384 | 3.208092486 |
| ENSG00000143127 | ITGA10   | 0.206072384 | 3.208092486 |
| ENSG00000143373 | ZNF687   | 0.206072384 | 3.208092486 |
| ENSG00000143384 | MCL1     | 0.206072384 | 3.208092486 |
| ENSG00000143590 | EFNA3    | 0.206072384 | 3.208092486 |
| ENSG00000143740 | SNAP47   | 0.206072384 | 3.208092486 |
| ENSG00000144057 | ST6GAL2  | 0.206072384 | 3.208092486 |

|                 |            |             |             |
|-----------------|------------|-------------|-------------|
| ENSG00000144191 | CNGA3      | 0.206072384 | 3.208092486 |
| ENSG00000145103 | ILDR1      | 0.206072384 | 3.208092486 |
| ENSG00000145375 | SPATA5     | 0.206072384 | 3.208092486 |
| ENSG00000145476 | CYP4V2     | 0.206072384 | 3.208092486 |
| ENSG00000145982 | FARS2      | 0.206072384 | 3.208092486 |
| ENSG00000146383 | TAAR6      | 0.206072384 | 3.208092486 |
| ENSG00000147251 | DOCK11     | 0.206072384 | 3.208092486 |
| ENSG00000147408 | CSGALNACT1 | 0.206072384 | 3.208092486 |
| ENSG00000147613 | PSKH2      | 0.206072384 | 3.208092486 |
| ENSG00000148219 | ASTN2      | 0.206072384 | 3.208092486 |
| ENSG00000148303 | RPL7A      | 0.206072384 | 3.208092486 |
| ENSG00000148308 | GTF3C5     | 0.206072384 | 3.208092486 |
| ENSG00000151067 | CACNA1C    | 0.206072384 | 3.208092486 |
| ENSG00000151304 | SRFBP1     | 0.206072384 | 3.208092486 |
| ENSG00000151651 | ADAM8      | 0.206072384 | 3.208092486 |
| ENSG00000151694 | ADAM17     | 0.206072384 | 3.208092486 |
| ENSG00000152689 | RASGRP3    | 0.206072384 | 3.208092486 |
| ENSG00000154124 | FAM105B    | 0.206072384 | 3.208092486 |
| ENSG00000154175 | ABI3BP     | 0.206072384 | 3.208092486 |
| ENSG00000154328 | NEIL2      | 0.206072384 | 3.208092486 |
| ENSG00000155660 | PDIA4      | 0.206072384 | 3.208092486 |
| ENSG00000155849 | ELMO1      | 0.206072384 | 3.208092486 |
| ENSG00000157368 | IL34       | 0.206072384 | 3.208092486 |
| ENSG00000157502 | MUM1L1     | 0.206072384 | 3.208092486 |
| ENSG00000157999 | ANKRD61    | 0.206072384 | 3.208092486 |
| ENSG00000158089 | GALNT14    | 0.206072384 | 3.208092486 |
| ENSG00000158092 | NCK1       | 0.206072384 | 3.208092486 |
| ENSG00000158716 | DUSP23     | 0.206072384 | 3.208092486 |
| ENSG00000159147 | DONSON     | 0.206072384 | 3.208092486 |
| ENSG00000160323 | ADAMTS13   | 0.206072384 | 3.208092486 |
| ENSG00000161509 | GRIN2C     | 0.206072384 | 3.208092486 |
| ENSG00000161850 | KRT82      | 0.206072384 | 3.208092486 |
| ENSG00000162069 | CCDC64B    | 0.206072384 | 3.208092486 |
| ENSG00000162231 | NXF1       | 0.206072384 | 3.208092486 |
| ENSG00000162396 | PARS2      | 0.206072384 | 3.208092486 |
| ENSG00000162641 | AKNAD1     | 0.206072384 | 3.208092486 |
| ENSG00000163518 | FCRL4      | 0.206072384 | 3.208092486 |
| ENSG00000163746 | PLSCR2     | 0.206072384 | 3.208092486 |
| ENSG00000164304 | CAGE1      | 0.206072384 | 3.208092486 |
| ENSG00000165138 | ANKS6      | 0.206072384 | 3.208092486 |
| ENSG00000165192 | ASB11      | 0.206072384 | 3.208092486 |
| ENSG00000166342 | NETO1      | 0.206072384 | 3.208092486 |
| ENSG00000167380 | ZNF226     | 0.206072384 | 3.208092486 |
| ENSG00000167757 | KLK11      | 0.206072384 | 3.208092486 |
| ENSG00000167941 | SOST       | 0.206072384 | 3.208092486 |
| ENSG00000168143 | FAM83B     | 0.206072384 | 3.208092486 |
| ENSG00000169064 | ZBBX       | 0.206072384 | 3.208092486 |

|                 |          |             |             |
|-----------------|----------|-------------|-------------|
| ENSG00000169994 | MYO7B    | 0.206072384 | 3.208092486 |
| ENSG00000170279 | C7orf33  | 0.206072384 | 3.208092486 |
| ENSG00000170891 | CYTL1    | 0.206072384 | 3.208092486 |
| ENSG00000171435 | KSR2     | 0.206072384 | 3.208092486 |
| ENSG00000172985 | SH3RF3   | 0.206072384 | 3.208092486 |
| ENSG00000175198 | PCCA     | 0.206072384 | 3.208092486 |
| ENSG00000175505 | CLCF1    | 0.206072384 | 3.208092486 |
| ENSG00000176040 | TMPRSS7  | 0.206072384 | 3.208092486 |
| ENSG00000177508 | IRX3     | 0.206072384 | 3.208092486 |
| ENSG00000179889 | PDXDC1   | 0.206072384 | 3.208092486 |
| ENSG00000179913 | B3GNT3   | 0.206072384 | 3.208092486 |
| ENSG00000180090 | OR3A1    | 0.206072384 | 3.208092486 |
| ENSG00000181004 | BBS12    | 0.206072384 | 3.208092486 |
| ENSG00000181935 | OR4C16   | 0.206072384 | 3.208092486 |
| ENSG00000181961 | OR4A16   | 0.206072384 | 3.208092486 |
| ENSG00000182179 | UBA7     | 0.206072384 | 3.208092486 |
| ENSG00000182352 | C17orf77 | 0.206072384 | 3.208092486 |
| ENSG00000182903 | ZNF721   | 0.206072384 | 3.208092486 |
| ENSG00000184428 | TOP1MT   | 0.206072384 | 3.208092486 |
| ENSG00000184786 | TCTE3    | 0.206072384 | 3.208092486 |
| ENSG00000184828 | ZBTB7C   | 0.206072384 | 3.208092486 |
| ENSG00000185070 | FLRT2    | 0.206072384 | 3.208092486 |
| ENSG00000185658 | BRWD1    | 0.206072384 | 3.208092486 |
| ENSG00000185666 | SYN3     | 0.206072384 | 3.208092486 |
| ENSG00000186075 | ZBPB2    | 0.206072384 | 3.208092486 |
| ENSG00000186458 | DEFB132  | 0.206072384 | 3.208092486 |
| ENSG00000188177 | ZC3H6    | 0.206072384 | 3.208092486 |
| ENSG00000188554 | NBR1     | 0.206072384 | 3.208092486 |
| ENSG00000188783 | PRELP    | 0.206072384 | 3.208092486 |
| ENSG00000189157 | FAM47E   | 0.206072384 | 3.208092486 |
| ENSG00000196214 | ZNF766   | 0.206072384 | 3.208092486 |
| ENSG00000196535 | MYO18A   | 0.206072384 | 3.208092486 |
| ENSG00000196914 | ARHGEF12 | 0.206072384 | 3.208092486 |
| ENSG00000197712 | FAM114A1 | 0.206072384 | 3.208092486 |
| ENSG00000197838 | CYP2A13  | 0.206072384 | 3.208092486 |
| ENSG00000197938 | OR5H2    | 0.206072384 | 3.208092486 |
| ENSG00000198231 | DDX42    | 0.206072384 | 3.208092486 |
| ENSG00000198554 | WDHD1    | 0.206072384 | 3.208092486 |
| ENSG00000198901 | PRC1     | 0.206072384 | 3.208092486 |
| ENSG00000205221 | VIT      | 0.206072384 | 3.208092486 |
| ENSG00000205413 | SAMD9    | 0.206072384 | 3.208092486 |
| ENSG00000205495 | OR52J3   | 0.206072384 | 3.208092486 |
| ENSG00000212123 | PRR22    | 0.206072384 | 3.208092486 |
| ENSG00000214188 | ST7-OT4  | 0.206072384 | 3.208092486 |
| ENSG00000221886 | C5orf54  | 0.206072384 | 3.208092486 |
| ENSG00000221994 | ZNF630   | 0.206072384 | 3.208092486 |
| ENSG00000225485 | ARHGAP23 | 0.206072384 | 3.208092486 |

|                 |         |             |             |
|-----------------|---------|-------------|-------------|
| ENSG00000240747 | KRBOX1  | 0.206072384 | 3.208092486 |
| ENSG00000250506 | CDK3    | 0.206072384 | 3.208092486 |
| ENSG00000251246 | EFNA3   | 0.206072384 | 3.208092486 |
| ENSG00000253953 | PCDHGB4 | 0.206072384 | 3.208092486 |
| ENSG00000255221 | CARD17  | 0.206072384 | 3.208092486 |
| ENSG00000257046 | LST3    | 0.206072384 | 3.208092486 |
| ENSG00000258366 | RTEL1   | 0.206072384 | 3.208092486 |
| ENSG00000266714 | MYO15B  | 0.206072384 | 3.208092486 |
| ENSG00000198691 | ABCA4   | 0.206554333 | 1.76126558  |
| ENSG00000008130 | NADK    | 0.207471874 | 2.322497861 |
| ENSG00000076554 | TPD52   | 0.207471874 | 2.322497861 |
| ENSG00000083454 | P2RX5   | 0.207471874 | 2.322497861 |
| ENSG00000091656 | ZFHX4   | 0.207471874 | 2.322497861 |
| ENSG00000100191 | SLC5A4  | 0.207471874 | 2.322497861 |
| ENSG00000115657 | ABCB6   | 0.207471874 | 2.322497861 |
| ENSG00000121904 | CSMD2   | 0.207471874 | 2.322497861 |
| ENSG00000123191 | ATP7B   | 0.207471874 | 2.322497861 |
| ENSG00000125257 | ABCC4   | 0.207471874 | 2.322497861 |
| ENSG00000135541 | AHI1    | 0.207471874 | 2.322497861 |
| ENSG00000148400 | NOTCH1  | 0.207471874 | 2.322497861 |
| ENSG00000154678 | PDE1C   | 0.207471874 | 2.322497861 |
| ENSG00000158125 | XDH     | 0.207471874 | 2.322497861 |
| ENSG00000162771 | FAM71A  | 0.207471874 | 2.322497861 |
| ENSG00000163492 | CCDC141 | 0.207471874 | 2.322497861 |
| ENSG00000166341 | DCHS1   | 0.207471874 | 2.322497861 |
| ENSG00000175356 | SCUBE2  | 0.207471874 | 2.322497861 |
| ENSG00000178404 | DDC8    | 0.207471874 | 2.322497861 |
| ENSG00000214814 | FER1L6  | 0.207471874 | 2.322497861 |
| ENSG00000185958 | FAM186A | 0.209346147 | 1.94726657  |
| ENSG00000109066 | TMEM104 | 0.211364971 | 0.269680041 |
| ENSG00000123104 | ITPR2   | 0.211364971 | 0.269680041 |
| ENSG00000160051 | IQCC    | 0.211364971 | 0.269680041 |
| ENSG00000215018 | COL28A1 | 0.211364971 | 0.269680041 |
| ENSG00000083857 | FAT1    | 0.231225093 | 1.836518047 |
| ENSG00000140836 | ZFHX3   | 0.231225093 | 1.836518047 |
| ENSG00000002549 | LAP3    | 0.240497208 | 5.282485876 |
| ENSG00000003400 | CASP10  | 0.240497208 | 5.282485876 |
| ENSG00000005238 | FAM214B | 0.240497208 | 5.282485876 |
| ENSG00000006530 | AGK     | 0.240497208 | 5.282485876 |
| ENSG00000010256 | UQCRC1  | 0.240497208 | 5.282485876 |
| ENSG00000010310 | GIPR    | 0.240497208 | 5.282485876 |
| ENSG00000010322 | NISCH   | 0.240497208 | 5.282485876 |
| ENSG00000010539 | ZNF200  | 0.240497208 | 5.282485876 |
| ENSG00000010626 | LRRC23  | 0.240497208 | 5.282485876 |
| ENSG00000010803 | SCMH1   | 0.240497208 | 5.282485876 |
| ENSG00000011083 | SLC6A7  | 0.240497208 | 5.282485876 |
| ENSG00000012779 | ALOX5   | 0.240497208 | 5.282485876 |

|                 |         |             |             |
|-----------------|---------|-------------|-------------|
| ENSG00000013375 | PGM3    | 0.240497208 | 5.282485876 |
| ENSG00000014138 | POLA2   | 0.240497208 | 5.282485876 |
| ENSG00000023445 | BIRC3   | 0.240497208 | 5.282485876 |
| ENSG00000028277 | POU2F2  | 0.240497208 | 5.282485876 |
| ENSG00000038358 | EDC4    | 0.240497208 | 5.282485876 |
| ENSG00000038382 | TRIO    | 0.240497208 | 5.282485876 |
| ENSG00000047621 | C12orf4 | 0.240497208 | 5.282485876 |
| ENSG00000047662 | FAM184B | 0.240497208 | 5.282485876 |
| ENSG00000049167 | ERCC8   | 0.240497208 | 5.282485876 |
| ENSG00000049656 | CLPTM1L | 0.240497208 | 5.282485876 |
| ENSG00000049860 | HEXB    | 0.240497208 | 5.282485876 |
| ENSG00000050405 | LIMA1   | 0.240497208 | 5.282485876 |
| ENSG00000054282 | SDCCAG8 | 0.240497208 | 5.282485876 |
| ENSG00000054938 | CHRD12  | 0.240497208 | 5.282485876 |
| ENSG00000057468 | MSH4    | 0.240497208 | 5.282485876 |
| ENSG00000060749 | QSER1   | 0.240497208 | 5.282485876 |
| ENSG00000061918 | GUCY1B3 | 0.240497208 | 5.282485876 |
| ENSG00000063015 | SEZ6    | 0.240497208 | 5.282485876 |
| ENSG00000064012 | CASP8   | 0.240497208 | 5.282485876 |
| ENSG00000064835 | POU1F1  | 0.240497208 | 5.282485876 |
| ENSG00000064886 | CHI3L2  | 0.240497208 | 5.282485876 |
| ENSG00000065328 | MCM10   | 0.240497208 | 5.282485876 |
| ENSG00000065717 | TLE2    | 0.240497208 | 5.282485876 |
| ENSG00000066468 | FGFR2   | 0.240497208 | 5.282485876 |
| ENSG00000067066 | SP100   | 0.240497208 | 5.282485876 |
| ENSG00000067191 | CACNB1  | 0.240497208 | 5.282485876 |
| ENSG00000068793 | CYFIP1  | 0.240497208 | 5.282485876 |
| ENSG00000069206 | ADAM7   | 0.240497208 | 5.282485876 |
| ENSG00000069493 | CLEC2D  | 0.240497208 | 5.282485876 |
| ENSG00000069966 | GNB5    | 0.240497208 | 5.282485876 |
| ENSG00000070214 | SLC44A1 | 0.240497208 | 5.282485876 |
| ENSG00000070785 | EIF2B3  | 0.240497208 | 5.282485876 |
| ENSG00000070985 | TRPM5   | 0.240497208 | 5.282485876 |
| ENSG00000071203 | MS4A12  | 0.240497208 | 5.282485876 |
| ENSG00000071553 | ATP6AP1 | 0.240497208 | 5.282485876 |
| ENSG00000072071 | LPHN1   | 0.240497208 | 5.282485876 |
| ENSG00000072163 | LIMS2   | 0.240497208 | 5.282485876 |
| ENSG00000072756 | TRNT1   | 0.240497208 | 5.282485876 |
| ENSG00000072832 | CRMP1   | 0.240497208 | 5.282485876 |
| ENSG00000073111 | MCM2    | 0.240497208 | 5.282485876 |
| ENSG00000074803 | SLC12A1 | 0.240497208 | 5.282485876 |
| ENSG00000075073 | TACR2   | 0.240497208 | 5.282485876 |
| ENSG00000075790 | BCAP29  | 0.240497208 | 5.282485876 |
| ENSG00000075945 | KIFAP3  | 0.240497208 | 5.282485876 |
| ENSG00000076003 | MCM6    | 0.240497208 | 5.282485876 |
| ENSG00000077800 | FKBP6   | 0.240497208 | 5.282485876 |
| ENSG00000078246 | TULP3   | 0.240497208 | 5.282485876 |

|                 |          |             |             |
|-----------------|----------|-------------|-------------|
| ENSG00000079393 | DUSP13   | 0.240497208 | 5.282485876 |
| ENSG00000079432 | CIC      | 0.240497208 | 5.282485876 |
| ENSG00000080007 | DDX43    | 0.240497208 | 5.282485876 |
| ENSG00000080511 | RDH8     | 0.240497208 | 5.282485876 |
| ENSG00000080546 | SESN1    | 0.240497208 | 5.282485876 |
| ENSG00000080603 | SRCAP    | 0.240497208 | 5.282485876 |
| ENSG00000080824 | HSP90AA1 | 0.240497208 | 5.282485876 |
| ENSG00000080839 | RBL1     | 0.240497208 | 5.282485876 |
| ENSG00000081277 | PKP1     | 0.240497208 | 5.282485876 |
| ENSG00000081800 | SLC13A1  | 0.240497208 | 5.282485876 |
| ENSG00000082126 | MPP4     | 0.240497208 | 5.282485876 |
| ENSG00000085185 | BCORL1   | 0.240497208 | 5.282485876 |
| ENSG00000085719 | CPNE3    | 0.240497208 | 5.282485876 |
| ENSG00000085788 | DDHD2    | 0.240497208 | 5.282485876 |
| ENSG00000085831 | TTC39A   | 0.240497208 | 5.282485876 |
| ENSG00000085832 | EPS15    | 0.240497208 | 5.282485876 |
| ENSG00000087253 | LPCAT2   | 0.240497208 | 5.282485876 |
| ENSG00000088448 | ANKRD10  | 0.240497208 | 5.282485876 |
| ENSG00000088836 | SLC4A11  | 0.240497208 | 5.282485876 |
| ENSG00000088881 | EBF4     | 0.240497208 | 5.282485876 |
| ENSG00000089053 | ANAPC5   | 0.240497208 | 5.282485876 |
| ENSG00000089327 | FXYD5    | 0.240497208 | 5.282485876 |
| ENSG00000089916 | GPATCH2L | 0.240497208 | 5.282485876 |
| ENSG00000090339 | ICAM1    | 0.240497208 | 5.282485876 |
| ENSG00000090674 | MCOLN1   | 0.240497208 | 5.282485876 |
| ENSG00000091428 | RAPGEF4  | 0.240497208 | 5.282485876 |
| ENSG00000091592 | NLRP1    | 0.240497208 | 5.282485876 |
| ENSG00000092068 | SLC7A8   | 0.240497208 | 5.282485876 |
| ENSG00000092203 | TOX4     | 0.240497208 | 5.282485876 |
| ENSG00000093167 | LRRFIP2  | 0.240497208 | 5.282485876 |
| ENSG00000096088 | PGC      | 0.240497208 | 5.282485876 |
| ENSG00000099250 | NRP1     | 0.240497208 | 5.282485876 |
| ENSG00000099326 | MZF1     | 0.240497208 | 5.282485876 |
| ENSG00000099331 | MYO9B    | 0.240497208 | 5.282485876 |
| ENSG00000099994 | SUSD2    | 0.240497208 | 5.282485876 |
| ENSG00000100038 | TOP3B    | 0.240497208 | 5.282485876 |
| ENSG00000100060 | MFNG     | 0.240497208 | 5.282485876 |
| ENSG00000100077 | ADRBK2   | 0.240497208 | 5.282485876 |
| ENSG00000100083 | GGA1     | 0.240497208 | 5.282485876 |
| ENSG00000100239 | PPP6R2   | 0.240497208 | 5.282485876 |
| ENSG00000100368 | CSF2RB   | 0.240497208 | 5.282485876 |
| ENSG00000100425 | BRD1     | 0.240497208 | 5.282485876 |
| ENSG00000100453 | GZMB     | 0.240497208 | 5.282485876 |
| ENSG00000100721 | TCL1A    | 0.240497208 | 5.282485876 |
| ENSG00000100739 | BDKRB1   | 0.240497208 | 5.282485876 |
| ENSG00000101181 | MTG2     | 0.240497208 | 5.282485876 |
| ENSG00000101199 | ARFGAP1  | 0.240497208 | 5.282485876 |

|                 |                |             |             |
|-----------------|----------------|-------------|-------------|
| ENSG00000101442 | ACTR5          | 0.240497208 | 5.282485876 |
| ENSG00000101444 | AHCY           | 0.240497208 | 5.282485876 |
| ENSG00000101557 | USP14          | 0.240497208 | 5.282485876 |
| ENSG00000101825 | MXRA5          | 0.240497208 | 5.282485876 |
| ENSG00000102032 | RENBP          | 0.240497208 | 5.282485876 |
| ENSG00000102543 | CDADC1         | 0.240497208 | 5.282485876 |
| ENSG00000102595 | UGGT2          | 0.240497208 | 5.282485876 |
| ENSG00000102996 | MMP15          | 0.240497208 | 5.282485876 |
| ENSG00000103051 | COG4           | 0.240497208 | 5.282485876 |
| ENSG00000103245 | NARFL          | 0.240497208 | 5.282485876 |
| ENSG00000103356 | EARS2          | 0.240497208 | 5.282485876 |
| ENSG00000103479 | RBL2           | 0.240497208 | 5.282485876 |
| ENSG00000104324 | CPQ            | 0.240497208 | 5.282485876 |
| ENSG00000104518 | GSDMD          | 0.240497208 | 5.282485876 |
| ENSG00000104825 | NFKBIB         | 0.240497208 | 5.282485876 |
| ENSG00000105127 | AKAP8          | 0.240497208 | 5.282485876 |
| ENSG00000105141 | CASP14         | 0.240497208 | 5.282485876 |
| ENSG00000105186 | ANKRD27        | 0.240497208 | 5.282485876 |
| ENSG00000105204 | DYRK1B         | 0.240497208 | 5.282485876 |
| ENSG00000105287 | PRKD2          | 0.240497208 | 5.282485876 |
| ENSG00000105447 | GRWD1          | 0.240497208 | 5.282485876 |
| ENSG00000105655 | ISYNA1         | 0.240497208 | 5.282485876 |
| ENSG00000105701 | FKBP8          | 0.240497208 | 5.282485876 |
| ENSG00000105851 | PIK3CG         | 0.240497208 | 5.282485876 |
| ENSG00000105926 | MPP6           | 0.240497208 | 5.282485876 |
| ENSG00000105939 | ZC3HAV1        | 0.240497208 | 5.282485876 |
| ENSG00000105974 | CAV1           | 0.240497208 | 5.282485876 |
| ENSG00000106018 | VIPR2          | 0.240497208 | 5.282485876 |
| ENSG00000106080 | FKBP14         | 0.240497208 | 5.282485876 |
| ENSG00000106330 | MOSPD3         | 0.240497208 | 5.282485876 |
| ENSG00000106333 | PCOLCE         | 0.240497208 | 5.282485876 |
| ENSG00000106348 | IMPDH1         | 0.240497208 | 5.282485876 |
| ENSG00000106789 | CORO2A         | 0.240497208 | 5.282485876 |
| ENSG00000106804 | C5             | 0.240497208 | 5.282485876 |
| ENSG00000106927 | AMBP           | 0.240497208 | 5.282485876 |
| ENSG00000107175 | CREB3          | 0.240497208 | 5.282485876 |
| ENSG00000107672 | NSMCE4A        | 0.240497208 | 5.282485876 |
| ENSG00000108179 | PPIF           | 0.240497208 | 5.282485876 |
| ENSG00000108242 | CYP2C18        | 0.240497208 | 5.282485876 |
| ENSG00000108255 | CRYBA1         | 0.240497208 | 5.282485876 |
| ENSG00000108588 | CCDC47         | 0.240497208 | 5.282485876 |
| ENSG00000108602 | ALDH3A1        | 0.240497208 | 5.282485876 |
| ENSG00000108774 | RAB5C          | 0.240497208 | 5.282485876 |
| ENSG00000108825 | PTGES3L-AARSD1 | 0.240497208 | 5.282485876 |
| ENSG00000109686 | SH3D19         | 0.240497208 | 5.282485876 |
| ENSG00000110628 | SLC22A18       | 0.240497208 | 5.282485876 |
| ENSG00000110660 | SLC35F2        | 0.240497208 | 5.282485876 |

|                 |          |             |             |
|-----------------|----------|-------------|-------------|
| ENSG00000110888 | CAPRIN2  | 0.240497208 | 5.282485876 |
| ENSG00000110955 | ATP5B    | 0.240497208 | 5.282485876 |
| ENSG00000111046 | MYF6     | 0.240497208 | 5.282485876 |
| ENSG00000111305 | GSG1     | 0.240497208 | 5.282485876 |
| ENSG00000111554 | MDM1     | 0.240497208 | 5.282485876 |
| ENSG00000111713 | GYS2     | 0.240497208 | 5.282485876 |
| ENSG00000111728 | ST8SIA1  | 0.240497208 | 5.282485876 |
| ENSG00000111801 | BTN3A3   | 0.240497208 | 5.282485876 |
| ENSG00000112320 | SOBP     | 0.240497208 | 5.282485876 |
| ENSG00000112473 | SLC39A7  | 0.240497208 | 5.282485876 |
| ENSG00000112761 | WISP3    | 0.240497208 | 5.282485876 |
| ENSG00000112851 | ERBB2IP  | 0.240497208 | 5.282485876 |
| ENSG00000112893 | MAN2A1   | 0.240497208 | 5.282485876 |
| ENSG00000113100 | CDH9     | 0.240497208 | 5.282485876 |
| ENSG00000113649 | TCERG1   | 0.240497208 | 5.282485876 |
| ENSG00000114757 | PEX5L    | 0.240497208 | 5.282485876 |
| ENSG00000114805 | PLCH1    | 0.240497208 | 5.282485876 |
| ENSG00000115053 | NCL      | 0.240497208 | 5.282485876 |
| ENSG00000115266 | APC2     | 0.240497208 | 5.282485876 |
| ENSG00000115289 | PCGF1    | 0.240497208 | 5.282485876 |
| ENSG00000115750 | TAF1B    | 0.240497208 | 5.282485876 |
| ENSG00000115758 | ODC1     | 0.240497208 | 5.282485876 |
| ENSG00000115956 | PLEK     | 0.240497208 | 5.282485876 |
| ENSG00000116213 | WRAP73   | 0.240497208 | 5.282485876 |
| ENSG00000116711 | PLA2G4A  | 0.240497208 | 5.282485876 |
| ENSG00000116747 | TROVE2   | 0.240497208 | 5.282485876 |
| ENSG00000117054 | ACADM    | 0.240497208 | 5.282485876 |
| ENSG00000117620 | SLC35A3  | 0.240497208 | 5.282485876 |
| ENSG00000117862 | TXNDC12  | 0.240497208 | 5.282485876 |
| ENSG00000118520 | ARG1     | 0.240497208 | 5.282485876 |
| ENSG00000118785 | SPP1     | 0.240497208 | 5.282485876 |
| ENSG00000118900 | UBN1     | 0.240497208 | 5.282485876 |
| ENSG00000118946 | PCDH17   | 0.240497208 | 5.282485876 |
| ENSG00000119487 | MAPKAP1  | 0.240497208 | 5.282485876 |
| ENSG00000119508 | NR4A3    | 0.240497208 | 5.282485876 |
| ENSG00000119514 | GALNT12  | 0.240497208 | 5.282485876 |
| ENSG00000119638 | NEK9     | 0.240497208 | 5.282485876 |
| ENSG00000119862 | LGALS1   | 0.240497208 | 5.282485876 |
| ENSG00000120029 | C10orf76 | 0.240497208 | 5.282485876 |
| ENSG00000120088 | CRHR1    | 0.240497208 | 5.282485876 |
| ENSG00000120341 | SEC16B   | 0.240497208 | 5.282485876 |
| ENSG00000120885 | CLU      | 0.240497208 | 5.282485876 |
| ENSG00000120937 | NPPB     | 0.240497208 | 5.282485876 |
| ENSG00000121314 | TAS2R8   | 0.240497208 | 5.282485876 |
| ENSG00000121410 | A1BG     | 0.240497208 | 5.282485876 |
| ENSG00000121741 | ZMYM2    | 0.240497208 | 5.282485876 |
| ENSG00000121933 | ADORA3   | 0.240497208 | 5.282485876 |

|                 |          |             |             |
|-----------------|----------|-------------|-------------|
| ENSG00000122477 | LRR39    | 0.240497208 | 5.282485876 |
| ENSG00000122707 | RECK     | 0.240497208 | 5.282485876 |
| ENSG00000122952 | ZWINT    | 0.240497208 | 5.282485876 |
| ENSG00000123106 | CCDC91   | 0.240497208 | 5.282485876 |
| ENSG00000123124 | WWP1     | 0.240497208 | 5.282485876 |
| ENSG00000123594 | ATXN3L   | 0.240497208 | 5.282485876 |
| ENSG00000123600 | METTL8   | 0.240497208 | 5.282485876 |
| ENSG00000124143 | ARHGAP40 | 0.240497208 | 5.282485876 |
| ENSG00000124203 | ZNF831   | 0.240497208 | 5.282485876 |
| ENSG00000124205 | EDN3     | 0.240497208 | 5.282485876 |
| ENSG00000124212 | PTGIS    | 0.240497208 | 5.282485876 |
| ENSG00000124575 | HIST1H1D | 0.240497208 | 5.282485876 |
| ENSG00000124767 | GLO1     | 0.240497208 | 5.282485876 |
| ENSG00000124795 | DEK      | 0.240497208 | 5.282485876 |
| ENSG00000125337 | KIF25    | 0.240497208 | 5.282485876 |
| ENSG00000125356 | NDUFA1   | 0.240497208 | 5.282485876 |
| ENSG00000125898 | FAM110A  | 0.240497208 | 5.282485876 |
| ENSG00000126870 | WDR60    | 0.240497208 | 5.282485876 |
| ENSG00000128283 | CDC42EP1 | 0.240497208 | 5.282485876 |
| ENSG00000128915 | NARG2    | 0.240497208 | 5.282485876 |
| ENSG00000129245 | FXR2     | 0.240497208 | 5.282485876 |
| ENSG00000130396 | MLLT4    | 0.240497208 | 5.282485876 |
| ENSG00000130508 | PXDN     | 0.240497208 | 5.282485876 |
| ENSG00000130725 | UBE2M    | 0.240497208 | 5.282485876 |
| ENSG00000130758 | MAP3K10  | 0.240497208 | 5.282485876 |
| ENSG00000130762 | ARHGEF16 | 0.240497208 | 5.282485876 |
| ENSG00000131127 | ZNF141   | 0.240497208 | 5.282485876 |
| ENSG00000131473 | ACLY     | 0.240497208 | 5.282485876 |
| ENSG00000131591 | C1orf159 | 0.240497208 | 5.282485876 |
| ENSG00000131668 | BARX1    | 0.240497208 | 5.282485876 |
| ENSG00000131943 | C19orf12 | 0.240497208 | 5.282485876 |
| ENSG00000132423 | COQ3     | 0.240497208 | 5.282485876 |
| ENSG00000132518 | GUCY2D   | 0.240497208 | 5.282485876 |
| ENSG00000132623 | ANKEF1   | 0.240497208 | 5.282485876 |
| ENSG00000132693 | CRP      | 0.240497208 | 5.282485876 |
| ENSG00000132716 | DCAF8    | 0.240497208 | 5.282485876 |
| ENSG00000132855 | ANGPTL3  | 0.240497208 | 5.282485876 |
| ENSG00000132932 | ATP8A2   | 0.240497208 | 5.282485876 |
| ENSG00000132953 | XPO4     | 0.240497208 | 5.282485876 |
| ENSG00000133131 | MORC4    | 0.240497208 | 5.282485876 |
| ENSG00000134020 | PEBP4    | 0.240497208 | 5.282485876 |
| ENSG00000134086 | VHL      | 0.240497208 | 5.282485876 |
| ENSG00000134109 | EDEM1    | 0.240497208 | 5.282485876 |
| ENSG00000134198 | TSPAN2   | 0.240497208 | 5.282485876 |
| ENSG00000134253 | TRIM45   | 0.240497208 | 5.282485876 |
| ENSG00000134317 | GRHL1    | 0.240497208 | 5.282485876 |
| ENSG00000135052 | GOLM1    | 0.240497208 | 5.282485876 |

|                 |          |             |             |
|-----------------|----------|-------------|-------------|
| ENSG00000135063 | FAM189A2 | 0.240497208 | 5.282485876 |
| ENSG00000135074 | ADAM19   | 0.240497208 | 5.282485876 |
| ENSG00000135100 | HNF1A    | 0.240497208 | 5.282485876 |
| ENSG00000135114 | OASL     | 0.240497208 | 5.282485876 |
| ENSG00000135298 | BAI3     | 0.240497208 | 5.282485876 |
| ENSG00000135333 | EPHA7    | 0.240497208 | 5.282485876 |
| ENSG00000135900 | MRPL44   | 0.240497208 | 5.282485876 |
| ENSG00000135902 | CHRND    | 0.240497208 | 5.282485876 |
| ENSG00000135953 | MFSD9    | 0.240497208 | 5.282485876 |
| ENSG00000135999 | EPC2     | 0.240497208 | 5.282485876 |
| ENSG00000136159 | NUDT15   | 0.240497208 | 5.282485876 |
| ENSG00000136286 | MYO1G    | 0.240497208 | 5.282485876 |
| ENSG00000136436 | CALCOCO2 | 0.240497208 | 5.282485876 |
| ENSG00000136541 | ERMN     | 0.240497208 | 5.282485876 |
| ENSG00000136542 | GALNT5   | 0.240497208 | 5.282485876 |
| ENSG00000136560 | TANK     | 0.240497208 | 5.282485876 |
| ENSG00000136710 | CCDC115  | 0.240497208 | 5.282485876 |
| ENSG00000136874 | STX17    | 0.240497208 | 5.282485876 |
| ENSG00000136935 | GOLGA1   | 0.240497208 | 5.282485876 |
| ENSG00000137270 | GCM1     | 0.240497208 | 5.282485876 |
| ENSG00000137462 | TLR2     | 0.240497208 | 5.282485876 |
| ENSG00000137486 | ARRB1    | 0.240497208 | 5.282485876 |
| ENSG00000137558 | PI15     | 0.240497208 | 5.282485876 |
| ENSG00000137700 | SLC37A4  | 0.240497208 | 5.282485876 |
| ENSG00000137714 | FDX1     | 0.240497208 | 5.282485876 |
| ENSG00000137745 | MMP13    | 0.240497208 | 5.282485876 |
| ENSG00000138028 | CGREF1   | 0.240497208 | 5.282485876 |
| ENSG00000138030 | KHK      | 0.240497208 | 5.282485876 |
| ENSG00000138347 | MYPN     | 0.240497208 | 5.282485876 |
| ENSG00000138678 | AGPAT9   | 0.240497208 | 5.282485876 |
| ENSG00000138823 | MTTP     | 0.240497208 | 5.282485876 |
| ENSG00000139131 | YARS2    | 0.240497208 | 5.282485876 |
| ENSG00000139174 | PRICKLE1 | 0.240497208 | 5.282485876 |
| ENSG00000139354 | GAS2L3   | 0.240497208 | 5.282485876 |
| ENSG00000139410 | SDSL     | 0.240497208 | 5.282485876 |
| ENSG00000139433 | GLTP     | 0.240497208 | 5.282485876 |
| ENSG00000139537 | CCDC65   | 0.240497208 | 5.282485876 |
| ENSG00000139668 | WDFY2    | 0.240497208 | 5.282485876 |
| ENSG00000139746 | RBM26    | 0.240497208 | 5.282485876 |
| ENSG00000139973 | SYT16    | 0.240497208 | 5.282485876 |
| ENSG00000140057 | AK7      | 0.240497208 | 5.282485876 |
| ENSG00000140090 | SLC24A4  | 0.240497208 | 5.282485876 |
| ENSG00000140254 | DUOXA1   | 0.240497208 | 5.282485876 |
| ENSG00000140332 | TLE3     | 0.240497208 | 5.282485876 |
| ENSG00000140455 | USP3     | 0.240497208 | 5.282485876 |
| ENSG00000140961 | OSGIN1   | 0.240497208 | 5.282485876 |
| ENSG00000141101 | NOB1     | 0.240497208 | 5.282485876 |

|                 |          |             |             |
|-----------------|----------|-------------|-------------|
| ENSG00000141385 | AFG3L2   | 0.240497208 | 5.282485876 |
| ENSG00000141448 | GATA6    | 0.240497208 | 5.282485876 |
| ENSG00000141574 | SECTM1   | 0.240497208 | 5.282485876 |
| ENSG00000141736 | ERBB2    | 0.240497208 | 5.282485876 |
| ENSG00000141946 | ZIM3     | 0.240497208 | 5.282485876 |
| ENSG00000142082 | SIRT3    | 0.240497208 | 5.282485876 |
| ENSG00000142444 | C19orf52 | 0.240497208 | 5.282485876 |
| ENSG00000143033 | MTF2     | 0.240497208 | 5.282485876 |
| ENSG00000143387 | CTSK     | 0.240497208 | 5.282485876 |
| ENSG00000143507 | DUSP10   | 0.240497208 | 5.282485876 |
| ENSG00000143536 | CRNN     | 0.240497208 | 5.282485876 |
| ENSG00000143545 | RAB13    | 0.240497208 | 5.282485876 |
| ENSG00000144021 | CIAO1    | 0.240497208 | 5.282485876 |
| ENSG00000144026 | ZNF514   | 0.240497208 | 5.282485876 |
| ENSG00000144821 | MYH15    | 0.240497208 | 5.282485876 |
| ENSG00000145354 | CISD2    | 0.240497208 | 5.282485876 |
| ENSG00000145491 | ROPN1L   | 0.240497208 | 5.282485876 |
| ENSG00000145526 | CDH18    | 0.240497208 | 5.282485876 |
| ENSG00000145725 | PPIP5K2  | 0.240497208 | 5.282485876 |
| ENSG00000145882 | PCYOX1L  | 0.240497208 | 5.282485876 |
| ENSG00000145949 | MYLK4    | 0.240497208 | 5.282485876 |
| ENSG00000146085 | MUT      | 0.240497208 | 5.282485876 |
| ENSG00000147140 | NONO     | 0.240497208 | 5.282485876 |
| ENSG00000147642 | SYBU     | 0.240497208 | 5.282485876 |
| ENSG00000147650 | LRP12    | 0.240497208 | 5.282485876 |
| ENSG00000147689 | FAM83A   | 0.240497208 | 5.282485876 |
| ENSG00000148814 | LRRC27   | 0.240497208 | 5.282485876 |
| ENSG00000148835 | TAF5     | 0.240497208 | 5.282485876 |
| ENSG00000149091 | DGKZ     | 0.240497208 | 5.282485876 |
| ENSG00000149636 | DSN1     | 0.240497208 | 5.282485876 |
| ENSG00000149922 | TBX6     | 0.240497208 | 5.282485876 |
| ENSG00000149968 | MMP3     | 0.240497208 | 5.282485876 |
| ENSG00000150403 | TMCO3    | 0.240497208 | 5.282485876 |
| ENSG00000150961 | SEC24D   | 0.240497208 | 5.282485876 |
| ENSG00000151148 | UBE3B    | 0.240497208 | 5.282485876 |
| ENSG00000151164 | RAD9B    | 0.240497208 | 5.282485876 |
| ENSG00000151176 | PLBD2    | 0.240497208 | 5.282485876 |
| ENSG00000151322 | NPAS3    | 0.240497208 | 5.282485876 |
| ENSG00000151474 | FRMD4A   | 0.240497208 | 5.282485876 |
| ENSG00000151883 | PARP8    | 0.240497208 | 5.282485876 |
| ENSG00000151929 | BAG3     | 0.240497208 | 5.282485876 |
| ENSG00000152092 | ASTN1    | 0.240497208 | 5.282485876 |
| ENSG00000152254 | G6PC2    | 0.240497208 | 5.282485876 |
| ENSG00000152767 | FARP1    | 0.240497208 | 5.282485876 |
| ENSG00000152952 | PLOD2    | 0.240497208 | 5.282485876 |
| ENSG00000154553 | PDLIM3   | 0.240497208 | 5.282485876 |
| ENSG00000154736 | ADAMTS5  | 0.240497208 | 5.282485876 |

|                 |          |             |             |
|-----------------|----------|-------------|-------------|
| ENSG00000155016 | CYP2U1   | 0.240497208 | 5.282485876 |
| ENSG00000155393 | HEATR3   | 0.240497208 | 5.282485876 |
| ENSG00000155970 | MICU3    | 0.240497208 | 5.282485876 |
| ENSG00000156603 | MED19    | 0.240497208 | 5.282485876 |
| ENSG00000156858 | PRR14    | 0.240497208 | 5.282485876 |
| ENSG00000157045 | NTAN1    | 0.240497208 | 5.282485876 |
| ENSG00000157191 | NECAP2   | 0.240497208 | 5.282485876 |
| ENSG00000157680 | DGKI     | 0.240497208 | 5.282485876 |
| ENSG00000157873 | TNFRSF14 | 0.240497208 | 5.282485876 |
| ENSG00000158352 | SHROOM4  | 0.240497208 | 5.282485876 |
| ENSG00000158571 | PFKFB1   | 0.240497208 | 5.282485876 |
| ENSG00000158691 | ZSCAN12  | 0.240497208 | 5.282485876 |
| ENSG00000159259 | CHAF1B   | 0.240497208 | 5.282485876 |
| ENSG00000159733 | ZFYVE28  | 0.240497208 | 5.282485876 |
| ENSG00000160211 | G6PD     | 0.240497208 | 5.282485876 |
| ENSG00000160255 | ITGB2    | 0.240497208 | 5.282485876 |
| ENSG00000160469 | BRSK1    | 0.240497208 | 5.282485876 |
| ENSG00000160691 | SHC1     | 0.240497208 | 5.282485876 |
| ENSG00000161011 | SQSTM1   | 0.240497208 | 5.282485876 |
| ENSG00000161533 | ACOX1    | 0.240497208 | 5.282485876 |
| ENSG00000161609 | CCDC155  | 0.240497208 | 5.282485876 |
| ENSG00000161649 | CD300LG  | 0.240497208 | 5.282485876 |
| ENSG00000161681 | SHANK1   | 0.240497208 | 5.282485876 |
| ENSG00000161914 | ZNF653   | 0.240497208 | 5.282485876 |
| ENSG00000161973 | CCDC42   | 0.240497208 | 5.282485876 |
| ENSG00000162004 | CCDC78   | 0.240497208 | 5.282485876 |
| ENSG00000162383 | SLC1A7   | 0.240497208 | 5.282485876 |
| ENSG00000162398 | C1orf177 | 0.240497208 | 5.282485876 |
| ENSG00000162543 | UBXN10   | 0.240497208 | 5.282485876 |
| ENSG00000162585 | C1orf86  | 0.240497208 | 5.282485876 |
| ENSG00000162620 | LRRIQ3   | 0.240497208 | 5.282485876 |
| ENSG00000162639 | HENMT1   | 0.240497208 | 5.282485876 |
| ENSG00000162669 | HFM1     | 0.240497208 | 5.282485876 |
| ENSG00000162670 | BRINP3   | 0.240497208 | 5.282485876 |
| ENSG00000162738 | VANGL2   | 0.240497208 | 5.282485876 |
| ENSG00000162777 | DENND2D  | 0.240497208 | 5.282485876 |
| ENSG00000162843 | WDR64    | 0.240497208 | 5.282485876 |
| ENSG00000162889 | MAPKAPK2 | 0.240497208 | 5.282485876 |
| ENSG00000162929 | KIAA1841 | 0.240497208 | 5.282485876 |
| ENSG00000162980 | ARL5A    | 0.240497208 | 5.282485876 |
| ENSG00000162994 | CLHC1    | 0.240497208 | 5.282485876 |
| ENSG00000163012 | ZSWIM2   | 0.240497208 | 5.282485876 |
| ENSG00000163161 | ERCC3    | 0.240497208 | 5.282485876 |
| ENSG00000163297 | ANTXR2   | 0.240497208 | 5.282485876 |
| ENSG00000163431 | LMOD1    | 0.240497208 | 5.282485876 |
| ENSG00000163539 | CLASP2   | 0.240497208 | 5.282485876 |
| ENSG00000163625 | WDFY3    | 0.240497208 | 5.282485876 |

|                 |           |             |             |
|-----------------|-----------|-------------|-------------|
| ENSG00000163666 | HESX1     | 0.240497208 | 5.282485876 |
| ENSG00000163705 | FANCD2OS  | 0.240497208 | 5.282485876 |
| ENSG00000163874 | ZC3H12A   | 0.240497208 | 5.282485876 |
| ENSG00000163879 | DNALI1    | 0.240497208 | 5.282485876 |
| ENSG00000163900 | TMEM41A   | 0.240497208 | 5.282485876 |
| ENSG00000163946 | FAM208A   | 0.240497208 | 5.282485876 |
| ENSG00000164022 | AIMP1     | 0.240497208 | 5.282485876 |
| ENSG00000164031 | DNAJB14   | 0.240497208 | 5.282485876 |
| ENSG00000164068 | RNF123    | 0.240497208 | 5.282485876 |
| ENSG00000164113 | ADAD1     | 0.240497208 | 5.282485876 |
| ENSG00000164151 | KIAA0947  | 0.240497208 | 5.282485876 |
| ENSG00000164182 | NDUFAF2   | 0.240497208 | 5.282485876 |
| ENSG00000164237 | CMBL      | 0.240497208 | 5.282485876 |
| ENSG00000164402 | SEPT8     | 0.240497208 | 5.282485876 |
| ENSG00000164440 | TXLNB     | 0.240497208 | 5.282485876 |
| ENSG00000164466 | SFXN1     | 0.240497208 | 5.282485876 |
| ENSG00000164512 | ANKRD55   | 0.240497208 | 5.282485876 |
| ENSG00000164535 | DAGLB     | 0.240497208 | 5.282485876 |
| ENSG00000164619 | BMPER     | 0.240497208 | 5.282485876 |
| ENSG00000164626 | KCNK5     | 0.240497208 | 5.282485876 |
| ENSG00000164683 | HEY1      | 0.240497208 | 5.282485876 |
| ENSG00000164896 | FASTK     | 0.240497208 | 5.282485876 |
| ENSG00000164961 | KIAA0196  | 0.240497208 | 5.282485876 |
| ENSG00000165115 | KIF27     | 0.240497208 | 5.282485876 |
| ENSG00000165194 | PCDH19    | 0.240497208 | 5.282485876 |
| ENSG00000165359 | DDX26B    | 0.240497208 | 5.282485876 |
| ENSG00000165813 | C10orf118 | 0.240497208 | 5.282485876 |
| ENSG00000165912 | PACSN3    | 0.240497208 | 5.282485876 |
| ENSG00000165966 | PDZRN4    | 0.240497208 | 5.282485876 |
| ENSG00000165983 | PTER      | 0.240497208 | 5.282485876 |
| ENSG00000166025 | AMOTL1    | 0.240497208 | 5.282485876 |
| ENSG00000166130 | IKBIP     | 0.240497208 | 5.282485876 |
| ENSG00000166181 | API5      | 0.240497208 | 5.282485876 |
| ENSG00000166398 | KIAA0355  | 0.240497208 | 5.282485876 |
| ENSG00000166825 | ANPEP     | 0.240497208 | 5.282485876 |
| ENSG00000166922 | SCG5      | 0.240497208 | 5.282485876 |
| ENSG00000167230 | C17orf78  | 0.240497208 | 5.282485876 |
| ENSG00000167261 | DPEP2     | 0.240497208 | 5.282485876 |
| ENSG00000167543 | TP53I13   | 0.240497208 | 5.282485876 |
| ENSG00000167601 | AXL       | 0.240497208 | 5.282485876 |
| ENSG00000167612 | ANKRD33   | 0.240497208 | 5.282485876 |
| ENSG00000167614 | TTYH1     | 0.240497208 | 5.282485876 |
| ENSG00000167771 | RCOR2     | 0.240497208 | 5.282485876 |
| ENSG00000167916 | KRT24     | 0.240497208 | 5.282485876 |
| ENSG00000167981 | ZNF597    | 0.240497208 | 5.282485876 |
| ENSG00000168003 | SLC3A2    | 0.240497208 | 5.282485876 |
| ENSG00000168004 | HRASLS5   | 0.240497208 | 5.282485876 |

|                 |          |             |             |
|-----------------|----------|-------------|-------------|
| ENSG00000168237 | GLYCTK   | 0.240497208 | 5.282485876 |
| ENSG00000168765 | GSTM4    | 0.240497208 | 5.282485876 |
| ENSG00000168778 | TCTN2    | 0.240497208 | 5.282485876 |
| ENSG00000168826 | ZBTB49   | 0.240497208 | 5.282485876 |
| ENSG00000168944 | CEP120   | 0.240497208 | 5.282485876 |
| ENSG00000169006 | NTSR2    | 0.240497208 | 5.282485876 |
| ENSG00000169020 | ATP5I    | 0.240497208 | 5.282485876 |
| ENSG00000169327 | OR5AU1   | 0.240497208 | 5.282485876 |
| ENSG00000169594 | BNC1     | 0.240497208 | 5.282485876 |
| ENSG00000169604 | ANTXR1   | 0.240497208 | 5.282485876 |
| ENSG00000169621 | APLF     | 0.240497208 | 5.282485876 |
| ENSG00000169635 | HIC2     | 0.240497208 | 5.282485876 |
| ENSG00000169855 | ROBO1    | 0.240497208 | 5.282485876 |
| ENSG00000169957 | ZNF768   | 0.240497208 | 5.282485876 |
| ENSG00000170191 | NANP     | 0.240497208 | 5.282485876 |
| ENSG00000170271 | FAXDC2   | 0.240497208 | 5.282485876 |
| ENSG00000170310 | STX8     | 0.240497208 | 5.282485876 |
| ENSG00000170540 | ARL6IP1  | 0.240497208 | 5.282485876 |
| ENSG00000170558 | CDH2     | 0.240497208 | 5.282485876 |
| ENSG00000170632 | ARMC10   | 0.240497208 | 5.282485876 |
| ENSG00000170819 | BFSP2    | 0.240497208 | 5.282485876 |
| ENSG00000170920 | OR7G3    | 0.240497208 | 5.282485876 |
| ENSG00000171403 | KRT9     | 0.240497208 | 5.282485876 |
| ENSG00000171722 | C1orf111 | 0.240497208 | 5.282485876 |
| ENSG00000171843 | MLLT3    | 0.240497208 | 5.282485876 |
| ENSG00000171861 | RNMTL1   | 0.240497208 | 5.282485876 |
| ENSG00000171873 | ADRA1D   | 0.240497208 | 5.282485876 |
| ENSG00000172073 | TEX37    | 0.240497208 | 5.282485876 |
| ENSG00000172349 | IL16     | 0.240497208 | 5.282485876 |
| ENSG00000172365 | OR5B2    | 0.240497208 | 5.282485876 |
| ENSG00000172845 | SP3      | 0.240497208 | 5.282485876 |
| ENSG00000172932 | ANKRD13D | 0.240497208 | 5.282485876 |
| ENSG00000173065 | FAM222B  | 0.240497208 | 5.282485876 |
| ENSG00000173156 | RHOD     | 0.240497208 | 5.282485876 |
| ENSG00000173218 | VANGL1   | 0.240497208 | 5.282485876 |
| ENSG00000173227 | SYT12    | 0.240497208 | 5.282485876 |
| ENSG00000173258 | ZNF483   | 0.240497208 | 5.282485876 |
| ENSG00000173482 | PTPRM    | 0.240497208 | 5.282485876 |
| ENSG00000173511 | VEGFB    | 0.240497208 | 5.282485876 |
| ENSG00000173702 | MUC13    | 0.240497208 | 5.282485876 |
| ENSG00000173801 | JUP      | 0.240497208 | 5.282485876 |
| ENSG00000173826 | KCNH6    | 0.240497208 | 5.282485876 |
| ENSG00000173848 | NET1     | 0.240497208 | 5.282485876 |
| ENSG00000173905 | GOLIM4   | 0.240497208 | 5.282485876 |
| ENSG00000174348 | PODN     | 0.240497208 | 5.282485876 |
| ENSG00000174370 | C11orf45 | 0.240497208 | 5.282485876 |
| ENSG00000174373 | RALGAPA1 | 0.240497208 | 5.282485876 |

|                 |               |             |             |
|-----------------|---------------|-------------|-------------|
| ENSG00000174562 | KLK15         | 0.240497208 | 5.282485876 |
| ENSG00000174837 | EMR1          | 0.240497208 | 5.282485876 |
| ENSG00000174842 | GLMN          | 0.240497208 | 5.282485876 |
| ENSG00000174937 | OR5M3         | 0.240497208 | 5.282485876 |
| ENSG00000175040 | CHST2         | 0.240497208 | 5.282485876 |
| ENSG00000175224 | ATG13         | 0.240497208 | 5.282485876 |
| ENSG00000175229 | GAL3ST3       | 0.240497208 | 5.282485876 |
| ENSG00000175264 | CHST1         | 0.240497208 | 5.282485876 |
| ENSG00000175564 | UCP3          | 0.240497208 | 5.282485876 |
| ENSG00000175600 | SUGCT         | 0.240497208 | 5.282485876 |
| ENSG00000175619 | OR4B1         | 0.240497208 | 5.282485876 |
| ENSG00000175866 | BAIAP2        | 0.240497208 | 5.282485876 |
| ENSG00000176020 | AMIGO3        | 0.240497208 | 5.282485876 |
| ENSG00000176049 | JAKMIP2       | 0.240497208 | 5.282485876 |
| ENSG00000176092 | AIM1L         | 0.240497208 | 5.282485876 |
| ENSG00000176142 | TMEM39A       | 0.240497208 | 5.282485876 |
| ENSG00000176422 | SPRYD4        | 0.240497208 | 5.282485876 |
| ENSG00000176567 | OR4X1         | 0.240497208 | 5.282485876 |
| ENSG00000176593 | CTD-2368P22.1 | 0.240497208 | 5.282485876 |
| ENSG00000176658 | MYO1D         | 0.240497208 | 5.282485876 |
| ENSG00000176769 | TCERG1L       | 0.240497208 | 5.282485876 |
| ENSG00000176915 | ANKLE2        | 0.240497208 | 5.282485876 |
| ENSG00000176928 | GCNT4         | 0.240497208 | 5.282485876 |
| ENSG00000176946 | THAP4         | 0.240497208 | 5.282485876 |
| ENSG00000177030 | DEAF1         | 0.240497208 | 5.282485876 |
| ENSG00000177156 | TALDO1        | 0.240497208 | 5.282485876 |
| ENSG00000177414 | UBE2U         | 0.240497208 | 5.282485876 |
| ENSG00000177469 | PTRF          | 0.240497208 | 5.282485876 |
| ENSG00000177669 | MBOAT4        | 0.240497208 | 5.282485876 |
| ENSG00000177963 | RIC8A         | 0.240497208 | 5.282485876 |
| ENSG00000178171 | AMER3         | 0.240497208 | 5.282485876 |
| ENSG00000178568 | ERBB4         | 0.240497208 | 5.282485876 |
| ENSG00000178741 | COX5A         | 0.240497208 | 5.282485876 |
| ENSG00000178966 | RMI1          | 0.240497208 | 5.282485876 |
| ENSG00000179002 | TAS1R2        | 0.240497208 | 5.282485876 |
| ENSG00000179144 | GIMAP7        | 0.240497208 | 5.282485876 |
| ENSG00000179168 | GGN           | 0.240497208 | 5.282485876 |
| ENSG00000179344 | HLA-DQB1      | 0.240497208 | 5.282485876 |
| ENSG00000179588 | ZFPM1         | 0.240497208 | 5.282485876 |
| ENSG00000179698 | KIAA1875      | 0.240497208 | 5.282485876 |
| ENSG00000179965 | ZNF771        | 0.240497208 | 5.282485876 |
| ENSG00000180353 | HCLS1         | 0.240497208 | 5.282485876 |
| ENSG00000180383 | DEFB124       | 0.240497208 | 5.282485876 |
| ENSG00000180448 | HMHA1         | 0.240497208 | 5.282485876 |
| ENSG00000180488 | FAM73A        | 0.240497208 | 5.282485876 |
| ENSG00000180592 | SKIDA1        | 0.240497208 | 5.282485876 |
| ENSG00000181396 | OGFOD3        | 0.240497208 | 5.282485876 |

|                 |          |             |             |
|-----------------|----------|-------------|-------------|
| ENSG00000181409 | AATK     | 0.240497208 | 5.282485876 |
| ENSG00000181444 | ZNF467   | 0.240497208 | 5.282485876 |
| ENSG00000181752 | OR8K5    | 0.240497208 | 5.282485876 |
| ENSG00000182083 | OR6B2    | 0.240497208 | 5.282485876 |
| ENSG00000182272 | B4GALNT4 | 0.240497208 | 5.282485876 |
| ENSG00000182504 | CEP97    | 0.240497208 | 5.282485876 |
| ENSG00000182541 | LIMK2    | 0.240497208 | 5.282485876 |
| ENSG00000182628 | SKA2     | 0.240497208 | 5.282485876 |
| ENSG00000182700 | IGIP     | 0.240497208 | 5.282485876 |
| ENSG00000182810 | DDX28    | 0.240497208 | 5.282485876 |
| ENSG00000182957 | SPATA13  | 0.240497208 | 5.282485876 |
| ENSG00000183072 | NKX2-5   | 0.240497208 | 5.282485876 |
| ENSG00000183098 | GPC6     | 0.240497208 | 5.282485876 |
| ENSG00000183260 | ABHD16B  | 0.240497208 | 5.282485876 |
| ENSG00000183313 | OR52L1   | 0.240497208 | 5.282485876 |
| ENSG00000183421 | RIPK4    | 0.240497208 | 5.282485876 |
| ENSG00000183569 | SERHL2   | 0.240497208 | 5.282485876 |
| ENSG00000183665 | TRMT12   | 0.240497208 | 5.282485876 |
| ENSG00000183671 | GPR1     | 0.240497208 | 5.282485876 |
| ENSG00000183733 | FIGLA    | 0.240497208 | 5.282485876 |
| ENSG00000183762 | KREMEN1  | 0.240497208 | 5.282485876 |
| ENSG00000183785 | TUBA8    | 0.240497208 | 5.282485876 |
| ENSG00000183831 | ANKRD45  | 0.240497208 | 5.282485876 |
| ENSG00000184402 | SS18L1   | 0.240497208 | 5.282485876 |
| ENSG00000184508 | HDDC3    | 0.240497208 | 5.282485876 |
| ENSG00000184661 | CDCA2    | 0.240497208 | 5.282485876 |
| ENSG00000185002 | RFX6     | 0.240497208 | 5.282485876 |
| ENSG00000185010 | F8       | 0.240497208 | 5.282485876 |
| ENSG00000185339 | TCN2     | 0.240497208 | 5.282485876 |
| ENSG00000185404 | SP140L   | 0.240497208 | 5.282485876 |
| ENSG00000185917 | SETD4    | 0.240497208 | 5.282485876 |
| ENSG00000186113 | OR5D14   | 0.240497208 | 5.282485876 |
| ENSG00000186212 | SOWAHB   | 0.240497208 | 5.282485876 |
| ENSG00000186431 | FCAR     | 0.240497208 | 5.282485876 |
| ENSG00000186442 | KRT3     | 0.240497208 | 5.282485876 |
| ENSG00000186452 | TMPRSS12 | 0.240497208 | 5.282485876 |
| ENSG00000186532 | SMYD4    | 0.240497208 | 5.282485876 |
| ENSG00000186765 | FSCN2    | 0.240497208 | 5.282485876 |
| ENSG00000187091 | PLCD1    | 0.240497208 | 5.282485876 |
| ENSG00000187144 | SPATA21  | 0.240497208 | 5.282485876 |
| ENSG00000187210 | GCNT1    | 0.240497208 | 5.282485876 |
| ENSG00000187258 | NPSR1    | 0.240497208 | 5.282485876 |
| ENSG00000187583 | PLEKHN1  | 0.240497208 | 5.282485876 |
| ENSG00000187871 | GFRAL    | 0.240497208 | 5.282485876 |
| ENSG00000188163 | FAM166A  | 0.240497208 | 5.282485876 |
| ENSG00000188227 | ZNF793   | 0.240497208 | 5.282485876 |
| ENSG00000188368 | PRR19    | 0.240497208 | 5.282485876 |

|                 |           |             |             |
|-----------------|-----------|-------------|-------------|
| ENSG00000188596 | C12orf55  | 0.240497208 | 5.282485876 |
| ENSG00000188739 | RBM34     | 0.240497208 | 5.282485876 |
| ENSG00000188770 | OPTC      | 0.240497208 | 5.282485876 |
| ENSG00000188803 | SHISA6    | 0.240497208 | 5.282485876 |
| ENSG00000188976 | NOC2L     | 0.240497208 | 5.282485876 |
| ENSG00000189233 | NUGGC     | 0.240497208 | 5.282485876 |
| ENSG00000189339 | SLC35E2B  | 0.240497208 | 5.282485876 |
| ENSG00000196123 | KIAA0895L | 0.240497208 | 5.282485876 |
| ENSG00000196132 | MYT1      | 0.240497208 | 5.282485876 |
| ENSG00000196267 | ZNF836    | 0.240497208 | 5.282485876 |
| ENSG00000196284 | SUPT3H    | 0.240497208 | 5.282485876 |
| ENSG00000196367 | TRRAP     | 0.240497208 | 5.282485876 |
| ENSG00000196526 | AFAP1     | 0.240497208 | 5.282485876 |
| ENSG00000196739 | COL27A1   | 0.240497208 | 5.282485876 |
| ENSG00000196924 | FLNA      | 0.240497208 | 5.282485876 |
| ENSG00000196950 | SLC39A10  | 0.240497208 | 5.282485876 |
| ENSG00000197043 | ANXA6     | 0.240497208 | 5.282485876 |
| ENSG00000197056 | ZMYM1     | 0.240497208 | 5.282485876 |
| ENSG00000197102 | DYNC1H1   | 0.240497208 | 5.282485876 |
| ENSG00000197125 | OR8B8     | 0.240497208 | 5.282485876 |
| ENSG00000197496 | SLC2A10   | 0.240497208 | 5.282485876 |
| ENSG00000197498 | RPF2      | 0.240497208 | 5.282485876 |
| ENSG00000197647 | ZNF433    | 0.240497208 | 5.282485876 |
| ENSG00000197785 | ATAD3A    | 0.240497208 | 5.282485876 |
| ENSG00000197937 | ZNF347    | 0.240497208 | 5.282485876 |
| ENSG00000197951 | ZNF71     | 0.240497208 | 5.282485876 |
| ENSG00000197956 | S100A6    | 0.240497208 | 5.282485876 |
| ENSG00000197992 | CLEC9A    | 0.240497208 | 5.282485876 |
| ENSG00000198056 | PRIM1     | 0.240497208 | 5.282485876 |
| ENSG00000198099 | ADH4      | 0.240497208 | 5.282485876 |
| ENSG00000198176 | TFDP1     | 0.240497208 | 5.282485876 |
| ENSG00000198225 | FKBP1C    | 0.240497208 | 5.282485876 |
| ENSG00000198353 | HOXC4     | 0.240497208 | 5.282485876 |
| ENSG00000198561 | CTNND1    | 0.240497208 | 5.282485876 |
| ENSG00000198723 | C19orf45  | 0.240497208 | 5.282485876 |
| ENSG00000198759 | EGFL6     | 0.240497208 | 5.282485876 |
| ENSG00000198774 | RASSF9    | 0.240497208 | 5.282485876 |
| ENSG00000198837 | DENND4B   | 0.240497208 | 5.282485876 |
| ENSG00000198951 | NAGA      | 0.240497208 | 5.282485876 |
| ENSG00000203786 | KPRP      | 0.240497208 | 5.282485876 |
| ENSG00000203870 | SMIM9     | 0.240497208 | 5.282485876 |
| ENSG00000204293 | OR8B2     | 0.240497208 | 5.282485876 |
| ENSG00000204511 | MCCD1     | 0.240497208 | 5.282485876 |
| ENSG00000204542 | C6orf15   | 0.240497208 | 5.282485876 |
| ENSG00000204657 | OR2H2     | 0.240497208 | 5.282485876 |
| ENSG00000204669 | C9orf57   | 0.240497208 | 5.282485876 |
| ENSG00000204687 | MAS1L     | 0.240497208 | 5.282485876 |

|                 |                |             |             |
|-----------------|----------------|-------------|-------------|
| ENSG00000204700 | OR2J2          | 0.240497208 | 5.282485876 |
| ENSG00000204701 | OR2J3          | 0.240497208 | 5.282485876 |
| ENSG00000204850 | AC011484.1     | 0.240497208 | 5.282485876 |
| ENSG00000204851 | PNMAL2         | 0.240497208 | 5.282485876 |
| ENSG00000205090 | TMEM240        | 0.240497208 | 5.282485876 |
| ENSG00000205464 | ATP6AP1L       | 0.240497208 | 5.282485876 |
| ENSG00000205758 | CRYZL1         | 0.240497208 | 5.282485876 |
| ENSG00000206532 | RP11-553A10.1  | 0.240497208 | 5.282485876 |
| ENSG00000206549 | PRSS50         | 0.240497208 | 5.282485876 |
| ENSG00000211694 | TRGV10         | 0.240497208 | 5.282485876 |
| ENSG00000212122 | TSSK1B         | 0.240497208 | 5.282485876 |
| ENSG00000212127 | TAS2R14        | 0.240497208 | 5.282485876 |
| ENSG00000213085 | CCDC19         | 0.240497208 | 5.282485876 |
| ENSG00000213160 | KLHL23         | 0.240497208 | 5.282485876 |
| ENSG00000213186 | TRIM59         | 0.240497208 | 5.282485876 |
| ENSG00000213413 | PVRIG          | 0.240497208 | 5.282485876 |
| ENSG00000213799 | ZNF845         | 0.240497208 | 5.282485876 |
| ENSG00000213983 | AP1G2          | 0.240497208 | 5.282485876 |
| ENSG00000214050 | FBXO16         | 0.240497208 | 5.282485876 |
| ENSG00000215193 | PEX26          | 0.240497208 | 5.282485876 |
| ENSG00000215790 | SLC35E2        | 0.240497208 | 5.282485876 |
| ENSG00000219481 | NBPF1          | 0.240497208 | 5.282485876 |
| ENSG00000221870 | TMEM257        | 0.240497208 | 5.282485876 |
| ENSG00000221937 | TAS2R40        | 0.240497208 | 5.282485876 |
| ENSG00000221978 | CCNL2          | 0.240497208 | 5.282485876 |
| ENSG00000225968 | ELFN1          | 0.240497208 | 5.282485876 |
| ENSG00000229474 | PATL2          | 0.240497208 | 5.282485876 |
| ENSG00000234444 | ZNF736         | 0.240497208 | 5.282485876 |
| ENSG00000235711 | ANKRD34C       | 0.240497208 | 5.282485876 |
| ENSG00000236287 | ZBED5          | 0.240497208 | 5.282485876 |
| ENSG00000240065 | PSMB9          | 0.240497208 | 5.282485876 |
| ENSG00000240303 | ACAD11         | 0.240497208 | 5.282485876 |
| ENSG00000240720 | LRRD1          | 0.240497208 | 5.282485876 |
| ENSG00000243444 | PALM2          | 0.240497208 | 5.282485876 |
| ENSG00000244462 | RBM12          | 0.240497208 | 5.282485876 |
| ENSG00000250317 | SMIM20         | 0.240497208 | 5.282485876 |
| ENSG00000251322 | SHANK3         | 0.240497208 | 5.282485876 |
| ENSG00000253291 | TRBV7-7        | 0.240497208 | 5.282485876 |
| ENSG00000255046 | RP11-297N6.4   | 0.240497208 | 5.282485876 |
| ENSG00000255692 | RP1-127H14.3   | 0.240497208 | 5.282485876 |
| ENSG00000256294 | ZNF225         | 0.240497208 | 5.282485876 |
| ENSG00000258465 | DCAF8          | 0.240497208 | 5.282485876 |
| ENSG00000258664 | IFRG15         | 0.240497208 | 5.282485876 |
| ENSG00000260342 | RP11-1035H13.3 | 0.240497208 | 5.282485876 |
| ENSG00000266173 | STRADA         | 0.240497208 | 5.282485876 |
| ENSG00000266967 | AARSD1         | 0.240497208 | 5.282485876 |
| ENSG00000267261 | CTD-2132N18.3  | 0.240497208 | 5.282485876 |

|                 |          |             |             |
|-----------------|----------|-------------|-------------|
| ENSG00000273266 | HOXC4    | 0.240497208 | 5.282485876 |
| ENSG00000014164 | ZC3H3    | 0.244364316 | 2.049158249 |
| ENSG00000106772 | PRUNE2   | 0.244364316 | 2.049158249 |
| ENSG00000127329 | PTPRB    | 0.244364316 | 2.049158249 |
| ENSG00000143669 | LYST     | 0.244364316 | 2.049158249 |
| ENSG00000148773 | MKI67    | 0.244364316 | 2.049158249 |
| ENSG00000163395 | IGFN1    | 0.244364316 | 2.049158249 |
| ENSG00000169330 | KIAA1024 | 0.244364316 | 2.049158249 |
| ENSG00000175054 | ATR      | 0.244364316 | 2.049158249 |
| ENSG00000177675 | CD163L1  | 0.244364316 | 2.049158249 |
| ENSG00000039600 | SOX30    | 0.246081787 | 0.142857143 |
| ENSG00000040275 | SPDL1    | 0.246081787 | 0.142857143 |
| ENSG00000049759 | NEDD4L   | 0.246081787 | 0.142857143 |
| ENSG00000058453 | CROCC    | 0.246081787 | 0.142857143 |
| ENSG00000063127 | SLC6A16  | 0.246081787 | 0.142857143 |
| ENSG00000091513 | TF       | 0.246081787 | 0.142857143 |
| ENSG00000091732 | ZC3HC1   | 0.246081787 | 0.142857143 |
| ENSG00000103168 | TAF1C    | 0.246081787 | 0.142857143 |
| ENSG00000104356 | POP1     | 0.246081787 | 0.142857143 |
| ENSG00000107937 | GTPBP4   | 0.246081787 | 0.142857143 |
| ENSG00000110002 | VWA5A    | 0.246081787 | 0.142857143 |
| ENSG00000111581 | NUP107   | 0.246081787 | 0.142857143 |
| ENSG00000112651 | MRPL2    | 0.246081787 | 0.142857143 |
| ENSG00000113758 | DBN1     | 0.246081787 | 0.142857143 |
| ENSG00000116254 | CHD5     | 0.246081787 | 0.142857143 |
| ENSG00000117475 | BLZF1    | 0.246081787 | 0.142857143 |
| ENSG00000117481 | NSUN4    | 0.246081787 | 0.142857143 |
| ENSG00000118503 | TNFAIP3  | 0.246081787 | 0.142857143 |
| ENSG00000118690 | ARMC2    | 0.246081787 | 0.142857143 |
| ENSG00000120156 | TEK      | 0.246081787 | 0.142857143 |
| ENSG00000122483 | CCDC18   | 0.246081787 | 0.142857143 |
| ENSG00000127325 | BEST3    | 0.246081787 | 0.142857143 |
| ENSG00000135569 | TAAR5    | 0.246081787 | 0.142857143 |
| ENSG00000140943 | MBTPS1   | 0.246081787 | 0.142857143 |
| ENSG00000141140 | MYO19    | 0.246081787 | 0.142857143 |
| ENSG00000144711 | IQSEC1   | 0.246081787 | 0.142857143 |
| ENSG00000146530 | VWDE     | 0.246081787 | 0.142857143 |
| ENSG00000149090 | PAMR1    | 0.246081787 | 0.142857143 |
| ENSG00000149115 | TNKS1BP1 | 0.246081787 | 0.142857143 |
| ENSG00000149489 | ROM1     | 0.246081787 | 0.142857143 |
| ENSG00000153930 | ANKFN1   | 0.246081787 | 0.142857143 |
| ENSG00000154930 | ACSS1    | 0.246081787 | 0.142857143 |
| ENSG00000156395 | SORCS3   | 0.246081787 | 0.142857143 |
| ENSG00000158555 | GDPD5    | 0.246081787 | 0.142857143 |
| ENSG00000164123 | C4orf45  | 0.246081787 | 0.142857143 |
| ENSG00000166311 | SMPD1    | 0.246081787 | 0.142857143 |
| ENSG00000170054 | SERPINA9 | 0.246081787 | 0.142857143 |

|                  |          |             |             |
|------------------|----------|-------------|-------------|
| ENSG00000170454  | KRT75    | 0.246081787 | 0.142857143 |
| ENSG00000172469  | MANEA    | 0.246081787 | 0.142857143 |
| ENSG00000173517  | PEAK1    | 0.246081787 | 0.142857143 |
| ENSG00000175213  | ZNF408   | 0.246081787 | 0.142857143 |
| ENSG00000178163  | ZNF518B  | 0.246081787 | 0.142857143 |
| ENSG00000178971  | CTC1     | 0.246081787 | 0.142857143 |
| ENSG00000179008  | C14orf39 | 0.246081787 | 0.142857143 |
| ENSG00000181827  | RFX7     | 0.246081787 | 0.142857143 |
| ENSG00000184863  | RBM33    | 0.246081787 | 0.142857143 |
| ENSG00000196859  | KRT39    | 0.246081787 | 0.142857143 |
| ENSG00000197991  | PCDH20   | 0.246081787 | 0.142857143 |
| ENSG00000164199  | GPR98    | 0.251039584 | 1.752182163 |
| ENSG00000004809  | SLC22A16 | 0.272991199 | 2.354385965 |
| ENSG00000007541  | PIGQ     | 0.272991199 | 2.354385965 |
| ENSG00000009724  | MASP2    | 0.272991199 | 2.354385965 |
| ENSG000000032219 | ARID4A   | 0.272991199 | 2.354385965 |
| ENSG000000039139 | DNAH5    | 0.272991199 | 2.354385965 |
| ENSG000000047410 | TPR      | 0.272991199 | 2.354385965 |
| ENSG000000053747 | LAMA3    | 0.272991199 | 2.354385965 |
| ENSG000000066557 | LRRC40   | 0.272991199 | 2.354385965 |
| ENSG000000070182 | SPTB     | 0.272991199 | 2.354385965 |
| ENSG000000070814 | TCOF1    | 0.272991199 | 2.354385965 |
| ENSG000000071127 | WDR1     | 0.272991199 | 2.354385965 |
| ENSG000000080573 | COL5A3   | 0.272991199 | 2.354385965 |
| ENSG000000083520 | DIS3     | 0.272991199 | 2.354385965 |
| ENSG000000087111 | PIGS     | 0.272991199 | 2.354385965 |
| ENSG000000096717 | SIRT1    | 0.272991199 | 2.354385965 |
| ENSG000000097007 | ABL1     | 0.272991199 | 2.354385965 |
| ENSG00000100116  | GCAT     | 0.272991199 | 2.354385965 |
| ENSG00000100697  | DICER1   | 0.272991199 | 2.354385965 |
| ENSG00000100867  | DHRS2    | 0.272991199 | 2.354385965 |
| ENSG00000103742  | IGDCC4   | 0.272991199 | 2.354385965 |
| ENSG00000104093  | DMXL2    | 0.272991199 | 2.354385965 |
| ENSG00000106624  | AEBP1    | 0.272991199 | 2.354385965 |
| ENSG00000107104  | KANK1    | 0.272991199 | 2.354385965 |
| ENSG00000109265  | KIAA1211 | 0.272991199 | 2.354385965 |
| ENSG00000114544  | SLC41A3  | 0.272991199 | 2.354385965 |
| ENSG00000114956  | DGUOK    | 0.272991199 | 2.354385965 |
| ENSG00000116701  | NCF2     | 0.272991199 | 2.354385965 |
| ENSG00000117983  | MUC5B    | 0.272991199 | 2.354385965 |
| ENSG00000119471  | HSDL2    | 0.272991199 | 2.354385965 |
| ENSG00000120800  | UTP20    | 0.272991199 | 2.354385965 |
| ENSG00000123636  | BAZ2B    | 0.272991199 | 2.354385965 |
| ENSG00000125484  | GTF3C4   | 0.272991199 | 2.354385965 |
| ENSG00000125844  | RRBP1    | 0.272991199 | 2.354385965 |
| ENSG00000130338  | TULP4    | 0.272991199 | 2.354385965 |
| ENSG00000132321  | IQCA1    | 0.272991199 | 2.354385965 |

|                 |          |             |             |
|-----------------|----------|-------------|-------------|
| ENSG00000132740 | IGHMBP2  | 0.272991199 | 2.354385965 |
| ENSG00000134256 | CD101    | 0.272991199 | 2.354385965 |
| ENSG00000135077 | HAVCR2   | 0.272991199 | 2.354385965 |
| ENSG00000135604 | STX11    | 0.272991199 | 2.354385965 |
| ENSG00000135931 | ARMC9    | 0.272991199 | 2.354385965 |
| ENSG00000136045 | PWP1     | 0.272991199 | 2.354385965 |
| ENSG00000136098 | NEK3     | 0.272991199 | 2.354385965 |
| ENSG00000137878 | GCOM1    | 0.272991199 | 2.354385965 |
| ENSG00000138109 | CYP2C9   | 0.272991199 | 2.354385965 |
| ENSG00000138166 | DUSP5    | 0.272991199 | 2.354385965 |
| ENSG00000138193 | PLCE1    | 0.272991199 | 2.354385965 |
| ENSG00000139880 | CDH24    | 0.272991199 | 2.354385965 |
| ENSG00000140471 | LINS     | 0.272991199 | 2.354385965 |
| ENSG00000144712 | CAND2    | 0.272991199 | 2.354385965 |
| ENSG00000148019 | CEP78    | 0.272991199 | 2.354385965 |
| ENSG00000150893 | FREM2    | 0.272991199 | 2.354385965 |
| ENSG00000153093 | ACOXL    | 0.272991199 | 2.354385965 |
| ENSG00000155066 | PROM2    | 0.272991199 | 2.354385965 |
| ENSG00000156787 | TBC1D31  | 0.272991199 | 2.354385965 |
| ENSG00000159450 | TCHH     | 0.272991199 | 2.354385965 |
| ENSG00000162598 | C1orf87  | 0.272991199 | 2.354385965 |
| ENSG00000162944 | RFTN2    | 0.272991199 | 2.354385965 |
| ENSG00000163938 | GNL3     | 0.272991199 | 2.354385965 |
| ENSG00000165102 | HGSNAT   | 0.272991199 | 2.354385965 |
| ENSG00000165730 | STOX1    | 0.272991199 | 2.354385965 |
| ENSG00000166348 | USP54    | 0.272991199 | 2.354385965 |
| ENSG00000166670 | MMP10    | 0.272991199 | 2.354385965 |
| ENSG00000166961 | MS4A15   | 0.272991199 | 2.354385965 |
| ENSG00000167634 | NLRP7    | 0.272991199 | 2.354385965 |
| ENSG00000168071 | CCDC88B  | 0.272991199 | 2.354385965 |
| ENSG00000168582 | CRYGA    | 0.272991199 | 2.354385965 |
| ENSG00000169116 | PARM1    | 0.272991199 | 2.354385965 |
| ENSG00000169129 | AFAP1L2  | 0.272991199 | 2.354385965 |
| ENSG00000169857 | AVEN     | 0.272991199 | 2.354385965 |
| ENSG00000170949 | ZNF160   | 0.272991199 | 2.354385965 |
| ENSG00000171502 | COL24A1  | 0.272991199 | 2.354385965 |
| ENSG00000171574 | ZNF584   | 0.272991199 | 2.354385965 |
| ENSG00000171681 | ATF7IP   | 0.272991199 | 2.354385965 |
| ENSG00000172653 | C17orf66 | 0.272991199 | 2.354385965 |
| ENSG00000172748 | ZNF596   | 0.272991199 | 2.354385965 |
| ENSG00000172927 | MYEOV    | 0.272991199 | 2.354385965 |
| ENSG00000174469 | CNTNAP2  | 0.272991199 | 2.354385965 |
| ENSG00000178394 | HTR1A    | 0.272991199 | 2.354385965 |
| ENSG00000178814 | OPLAH    | 0.272991199 | 2.354385965 |
| ENSG00000180263 | FGD6     | 0.272991199 | 2.354385965 |
| ENSG00000182095 | TNRC18   | 0.272991199 | 2.354385965 |
| ENSG00000182463 | TSHZ2    | 0.272991199 | 2.354385965 |

|                 |          |             |             |
|-----------------|----------|-------------|-------------|
| ENSG00000182871 | COL18A1  | 0.272991199 | 2.354385965 |
| ENSG00000183647 | ZNF530   | 0.272991199 | 2.354385965 |
| ENSG00000183773 | AIFM3    | 0.272991199 | 2.354385965 |
| ENSG00000185052 | SLC24A3  | 0.272991199 | 2.354385965 |
| ENSG00000185567 | AHNAK2   | 0.272991199 | 2.354385965 |
| ENSG00000186440 | OR6P1    | 0.272991199 | 2.354385965 |
| ENSG00000187801 | ZFP69B   | 0.272991199 | 2.354385965 |
| ENSG00000196090 | PTPRT    | 0.272991199 | 2.354385965 |
| ENSG00000197408 | CYP2B6   | 0.272991199 | 2.354385965 |
| ENSG00000197532 | OR6Y1    | 0.272991199 | 2.354385965 |
| ENSG00000203995 | ZYG11A   | 0.272991199 | 2.354385965 |
| ENSG00000204889 | KRT40    | 0.272991199 | 2.354385965 |
| ENSG00000205744 | DENND1C  | 0.272991199 | 2.354385965 |
| ENSG00000213199 | ASIC3    | 0.272991199 | 2.354385965 |
| ENSG00000214026 | MRPL23   | 0.272991199 | 2.354385965 |
| ENSG00000222046 | DCDC2B   | 0.272991199 | 2.354385965 |
| ENSG00000105877 | DNAH11   | 0.276154039 | 1.87562744  |
| ENSG00000140986 | RPL3L    | 0.276154039 | 1.87562744  |
| ENSG00000152580 | IGSF10   | 0.276154039 | 1.87562744  |
| ENSG00000153201 | RANBP2   | 0.276154039 | 1.87562744  |
| ENSG00000221866 | PLXNA4   | 0.276154039 | 1.87562744  |
| ENSG00000091536 | MYO15A   | 0.278641193 | 0.380269448 |
| ENSG00000145536 | ADAMTS16 | 0.303780836 | 1.755852843 |
| ENSG00000163359 | COL6A3   | 0.303780836 | 1.755852843 |
| ENSG00000174844 | DNAH12   | 0.303780836 | 1.755852843 |
| ENSG00000007314 | SCN4A    | 0.324873315 | 1.989010989 |
| ENSG00000030304 | MUSK     | 0.324873315 | 1.989010989 |
| ENSG00000039537 | C6       | 0.324873315 | 1.989010989 |
| ENSG00000047849 | MAP4     | 0.324873315 | 1.989010989 |
| ENSG00000068976 | PYGM     | 0.324873315 | 1.989010989 |
| ENSG00000070748 | CHAT     | 0.324873315 | 1.989010989 |
| ENSG00000074276 | CDHR2    | 0.324873315 | 1.989010989 |
| ENSG00000076356 | PLXNA2   | 0.324873315 | 1.989010989 |
| ENSG00000078114 | NEBL     | 0.324873315 | 1.989010989 |
| ENSG00000109794 | FAM149A  | 0.324873315 | 1.989010989 |
| ENSG00000111799 | COL12A1  | 0.324873315 | 1.989010989 |
| ENSG00000116285 | ERRFI1   | 0.324873315 | 1.989010989 |
| ENSG00000122140 | MRPS2    | 0.324873315 | 1.989010989 |
| ENSG00000123384 | LRP1     | 0.324873315 | 1.989010989 |
| ENSG00000126562 | WNK4     | 0.324873315 | 1.989010989 |
| ENSG00000127507 | EMR2     | 0.324873315 | 1.989010989 |
| ENSG00000129317 | PUS7L    | 0.324873315 | 1.989010989 |
| ENSG00000133808 | MICALCL  | 0.324873315 | 1.989010989 |
| ENSG00000133863 | TEX15    | 0.324873315 | 1.989010989 |
| ENSG00000136861 | CDK5RAP2 | 0.324873315 | 1.989010989 |
| ENSG00000137807 | KIF23    | 0.324873315 | 1.989010989 |
| ENSG00000138792 | ENPEP    | 0.324873315 | 1.989010989 |

|                 |           |             |             |
|-----------------|-----------|-------------|-------------|
| ENSG00000143126 | CELSR2    | 0.324873315 | 1.989010989 |
| ENSG00000143199 | ADCY10    | 0.324873315 | 1.989010989 |
| ENSG00000143375 | CGN       | 0.324873315 | 1.989010989 |
| ENSG00000143520 | FLG2      | 0.324873315 | 1.989010989 |
| ENSG00000144452 | ABCA12    | 0.324873315 | 1.989010989 |
| ENSG00000154134 | ROBO3     | 0.324873315 | 1.989010989 |
| ENSG00000157353 | FUK       | 0.324873315 | 1.989010989 |
| ENSG00000158220 | ESYT3     | 0.324873315 | 1.989010989 |
| ENSG00000164530 | PI16      | 0.324873315 | 1.989010989 |
| ENSG00000177992 | SPATA31E1 | 0.324873315 | 1.989010989 |
| ENSG00000180043 | FAM71E2   | 0.324873315 | 1.989010989 |
| ENSG00000183495 | EP400     | 0.324873315 | 1.989010989 |
| ENSG00000183963 | SMTN      | 0.324873315 | 1.989010989 |
| ENSG00000186400 | OR10X1    | 0.324873315 | 1.989010989 |
| ENSG00000198670 | LPA       | 0.324873315 | 1.989010989 |
| ENSG00000198947 | DMD       | 0.324873315 | 1.989010989 |
| ENSG00000134775 | FHOD3     | 0.3306187   | 0.461333333 |
| ENSG00000182578 | CSF1R     | 0.3306187   | 0.461333333 |
| ENSG00000178104 | PDE4DIP   | 0.349372318 | 1.601723492 |
| ENSG00000004139 | SARM1     | 0.362740873 | 2.466666667 |
| ENSG00000005187 | ACSM3     | 0.362740873 | 2.466666667 |
| ENSG00000005961 | ITGA2B    | 0.362740873 | 2.466666667 |
| ENSG00000007341 | ST7L      | 0.362740873 | 2.466666667 |
| ENSG00000008083 | JARID2    | 0.362740873 | 2.466666667 |
| ENSG00000008197 | TFAP2D    | 0.362740873 | 2.466666667 |
| ENSG00000011132 | APBA3     | 0.362740873 | 2.466666667 |
| ENSG00000012048 | BRCA1     | 0.362740873 | 2.466666667 |
| ENSG00000013293 | SLC7A14   | 0.362740873 | 2.466666667 |
| ENSG00000020922 | MRE11A    | 0.362740873 | 2.466666667 |
| ENSG00000023191 | RNH1      | 0.362740873 | 2.466666667 |
| ENSG00000026297 | RNASET2   | 0.362740873 | 2.466666667 |
| ENSG00000028203 | VEZT      | 0.362740873 | 2.466666667 |
| ENSG00000033170 | FUT8      | 0.362740873 | 2.466666667 |
| ENSG00000039560 | RAI14     | 0.362740873 | 2.466666667 |
| ENSG00000042286 | AIFM2     | 0.362740873 | 2.466666667 |
| ENSG00000044090 | CUL7      | 0.362740873 | 2.466666667 |
| ENSG00000046604 | DSG2      | 0.362740873 | 2.466666667 |
| ENSG00000053108 | FSTL4     | 0.362740873 | 2.466666667 |
| ENSG00000056736 | IL17RB    | 0.362740873 | 2.466666667 |
| ENSG00000059588 | TARBP1    | 0.362740873 | 2.466666667 |
| ENSG00000060982 | BCAT1     | 0.362740873 | 2.466666667 |
| ENSG00000064218 | DMRT3     | 0.362740873 | 2.466666667 |
| ENSG00000066923 | STAG3     | 0.362740873 | 2.466666667 |
| ENSG00000070061 | IKBKAP    | 0.362740873 | 2.466666667 |
| ENSG00000071205 | ARHGAP10  | 0.362740873 | 2.466666667 |
| ENSG00000073060 | SCARB1    | 0.362740873 | 2.466666667 |
| ENSG00000073067 | CYP2W1    | 0.362740873 | 2.466666667 |

|                 |          |             |             |
|-----------------|----------|-------------|-------------|
| ENSG00000075218 | GTSE1    | 0.362740873 | 2.466666667 |
| ENSG00000075340 | ADD2     | 0.362740873 | 2.466666667 |
| ENSG00000075420 | FNDC3B   | 0.362740873 | 2.466666667 |
| ENSG00000078070 | MCCC1    | 0.362740873 | 2.466666667 |
| ENSG00000078295 | ADCY2    | 0.362740873 | 2.466666667 |
| ENSG00000079277 | MKNK1    | 0.362740873 | 2.466666667 |
| ENSG00000080910 | CFHR2    | 0.362740873 | 2.466666667 |
| ENSG00000081051 | AFP      | 0.362740873 | 2.466666667 |
| ENSG00000081148 | IMPG2    | 0.362740873 | 2.466666667 |
| ENSG00000081842 | PCDHA6   | 0.362740873 | 2.466666667 |
| ENSG00000083782 | EPYC     | 0.362740873 | 2.466666667 |
| ENSG00000083807 | SLC27A5  | 0.362740873 | 2.466666667 |
| ENSG00000085276 | MECOM    | 0.362740873 | 2.466666667 |
| ENSG00000085465 | OVGP1    | 0.362740873 | 2.466666667 |
| ENSG00000085552 | IGSF9    | 0.362740873 | 2.466666667 |
| ENSG00000086991 | NOX4     | 0.362740873 | 2.466666667 |
| ENSG00000087077 | TRIP6    | 0.362740873 | 2.466666667 |
| ENSG00000088727 | KIF9     | 0.362740873 | 2.466666667 |
| ENSG00000089737 | DDX24    | 0.362740873 | 2.466666667 |
| ENSG00000092758 | COL9A3   | 0.362740873 | 2.466666667 |
| ENSG00000100031 | GGT1     | 0.362740873 | 2.466666667 |
| ENSG00000100225 | FBXO7    | 0.362740873 | 2.466666667 |
| ENSG00000100335 | MIEF1    | 0.362740873 | 2.466666667 |
| ENSG00000100346 | CACNA1I  | 0.362740873 | 2.466666667 |
| ENSG00000100379 | KCTD17   | 0.362740873 | 2.466666667 |
| ENSG00000100604 | CHGA     | 0.362740873 | 2.466666667 |
| ENSG00000100625 | SIX4     | 0.362740873 | 2.466666667 |
| ENSG00000101311 | FERMT1   | 0.362740873 | 2.466666667 |
| ENSG00000101407 | TTI1     | 0.362740873 | 2.466666667 |
| ENSG00000101445 | PPP1R16B | 0.362740873 | 2.466666667 |
| ENSG00000101446 | SPINT3   | 0.362740873 | 2.466666667 |
| ENSG00000101745 | ANKRD12  | 0.362740873 | 2.466666667 |
| ENSG00000102580 | DNAJC3   | 0.362740873 | 2.466666667 |
| ENSG00000103037 | SETD6    | 0.362740873 | 2.466666667 |
| ENSG00000103148 | NPRL3    | 0.362740873 | 2.466666667 |
| ENSG00000103449 | SALL1    | 0.362740873 | 2.466666667 |
| ENSG00000103540 | CCP110   | 0.362740873 | 2.466666667 |
| ENSG00000103591 | AAGAB    | 0.362740873 | 2.466666667 |
| ENSG00000103707 | MTFMT    | 0.362740873 | 2.466666667 |
| ENSG00000104529 | EEF1D    | 0.362740873 | 2.466666667 |
| ENSG00000105467 | SYNGR4   | 0.362740873 | 2.466666667 |
| ENSG00000105499 | PLA2G4C  | 0.362740873 | 2.466666667 |
| ENSG00000105559 | PLEKHA4  | 0.362740873 | 2.466666667 |
| ENSG00000105675 | ATP4A    | 0.362740873 | 2.466666667 |
| ENSG00000105929 | ATP6V0A4 | 0.362740873 | 2.466666667 |
| ENSG00000106246 | PTCD1    | 0.362740873 | 2.466666667 |
| ENSG00000107036 | KIAA1432 | 0.362740873 | 2.466666667 |

|                 |             |             |             |
|-----------------|-------------|-------------|-------------|
| ENSG00000107281 | NPDC1       | 0.362740873 | 2.466666667 |
| ENSG00000107447 | DNTT        | 0.362740873 | 2.466666667 |
| ENSG00000108424 | KPNB1       | 0.362740873 | 2.466666667 |
| ENSG00000108651 | UTP6        | 0.362740873 | 2.466666667 |
| ENSG00000108961 | RANGRF      | 0.362740873 | 2.466666667 |
| ENSG00000110013 | SIAE        | 0.362740873 | 2.466666667 |
| ENSG00000110619 | CARS        | 0.362740873 | 2.466666667 |
| ENSG00000110900 | TSPAN11     | 0.362740873 | 2.466666667 |
| ENSG00000111058 | ACSS3       | 0.362740873 | 2.466666667 |
| ENSG00000111271 | ACAD10      | 0.362740873 | 2.466666667 |
| ENSG00000111796 | KLRB1       | 0.362740873 | 2.466666667 |
| ENSG00000111802 | TDP2        | 0.362740873 | 2.466666667 |
| ENSG00000112394 | SLC16A10    | 0.362740873 | 2.466666667 |
| ENSG00000112624 | GLTSCR1L    | 0.362740873 | 2.466666667 |
| ENSG00000113140 | SPARC       | 0.362740873 | 2.466666667 |
| ENSG00000113504 | SLC12A7     | 0.362740873 | 2.466666667 |
| ENSG00000114742 | WDR48       | 0.362740873 | 2.466666667 |
| ENSG00000115084 | SLC35F5     | 0.362740873 | 2.466666667 |
| ENSG00000115109 | EPB41L5     | 0.362740873 | 2.466666667 |
| ENSG00000115598 | IL1RL2      | 0.362740873 | 2.466666667 |
| ENSG00000115602 | IL1RL1      | 0.362740873 | 2.466666667 |
| ENSG00000116406 | EDEM3       | 0.362740873 | 2.466666667 |
| ENSG00000116874 | WARS2       | 0.362740873 | 2.466666667 |
| ENSG00000117009 | KMO         | 0.362740873 | 2.466666667 |
| ENSG00000117281 | CD160       | 0.362740873 | 2.466666667 |
| ENSG00000117425 | PTCH2       | 0.362740873 | 2.466666667 |
| ENSG00000117461 | PIK3R3      | 0.362740873 | 2.466666667 |
| ENSG00000117501 | MROH9       | 0.362740873 | 2.466666667 |
| ENSG00000118514 | ALDH8A1     | 0.362740873 | 2.466666667 |
| ENSG00000118557 | PMFBP1      | 0.362740873 | 2.466666667 |
| ENSG00000119121 | TRPM6       | 0.362740873 | 2.466666667 |
| ENSG00000119688 | ABCD4       | 0.362740873 | 2.466666667 |
| ENSG00000119820 | YIPF4       | 0.362740873 | 2.466666667 |
| ENSG00000120158 | RCL1        | 0.362740873 | 2.466666667 |
| ENSG00000121053 | EPX         | 0.362740873 | 2.466666667 |
| ENSG00000121270 | ABCC11      | 0.362740873 | 2.466666667 |
| ENSG00000122188 | LAX1        | 0.362740873 | 2.466666667 |
| ENSG00000122299 | ZC3H7A      | 0.362740873 | 2.466666667 |
| ENSG00000122728 | TAF1L       | 0.362740873 | 2.466666667 |
| ENSG00000124256 | ZBP1        | 0.362740873 | 2.466666667 |
| ENSG00000124574 | ABCC10      | 0.362740873 | 2.466666667 |
| ENSG00000125637 | PSD4        | 0.362740873 | 2.466666667 |
| ENSG00000125954 | CHURC1-FNTB | 0.362740873 | 2.466666667 |
| ENSG00000127334 | DYRK2       | 0.362740873 | 2.466666667 |
| ENSG00000127995 | CASD1       | 0.362740873 | 2.466666667 |
| ENSG00000128159 | TUBGCP6     | 0.362740873 | 2.466666667 |
| ENSG00000129292 | PHF20L1     | 0.362740873 | 2.466666667 |

|                 |           |             |             |
|-----------------|-----------|-------------|-------------|
| ENSG00000129625 | REEP5     | 0.362740873 | 2.466666667 |
| ENSG00000130643 | CALY      | 0.362740873 | 2.466666667 |
| ENSG00000131050 | BPIFA2    | 0.362740873 | 2.466666667 |
| ENSG00000132005 | RFX1      | 0.362740873 | 2.466666667 |
| ENSG00000132026 | RTBDN     | 0.362740873 | 2.466666667 |
| ENSG00000132437 | DDC       | 0.362740873 | 2.466666667 |
| ENSG00000132535 | DLG4      | 0.362740873 | 2.466666667 |
| ENSG00000132793 | LPIN3     | 0.362740873 | 2.466666667 |
| ENSG00000132849 | INADL     | 0.362740873 | 2.466666667 |
| ENSG00000133246 | PRAM1     | 0.362740873 | 2.466666667 |
| ENSG00000133488 | SEC14L4   | 0.362740873 | 2.466666667 |
| ENSG00000134343 | ANO3      | 0.362740873 | 2.466666667 |
| ENSG00000134909 | ARHGAP32  | 0.362740873 | 2.466666667 |
| ENSG00000135049 | AGTPBP1   | 0.362740873 | 2.466666667 |
| ENSG00000135124 | P2RX4     | 0.362740873 | 2.466666667 |
| ENSG00000135451 | TROAP     | 0.362740873 | 2.466666667 |
| ENSG00000135622 | SEMA4F    | 0.362740873 | 2.466666667 |
| ENSG00000136044 | APPL2     | 0.362740873 | 2.466666667 |
| ENSG00000136295 | TTYH3     | 0.362740873 | 2.466666667 |
| ENSG00000136536 | MARCH7    | 0.362740873 | 2.466666667 |
| ENSG00000136750 | GAD2      | 0.362740873 | 2.466666667 |
| ENSG00000136869 | TLR4      | 0.362740873 | 2.466666667 |
| ENSG00000137098 | SPAG8     | 0.362740873 | 2.466666667 |
| ENSG00000137103 | TMEM8B    | 0.362740873 | 2.466666667 |
| ENSG00000137261 | KIAA0319  | 0.362740873 | 2.466666667 |
| ENSG00000137392 | CLPS      | 0.362740873 | 2.466666667 |
| ENSG00000137571 | SLCO5A1   | 0.362740873 | 2.466666667 |
| ENSG00000138075 | ABCG5     | 0.362740873 | 2.466666667 |
| ENSG00000138293 | NCOA4     | 0.362740873 | 2.466666667 |
| ENSG00000138587 | MNS1      | 0.362740873 | 2.466666667 |
| ENSG00000138606 | SHF       | 0.362740873 | 2.466666667 |
| ENSG00000139083 | ETV6      | 0.362740873 | 2.466666667 |
| ENSG00000139155 | SLCO1C1   | 0.362740873 | 2.466666667 |
| ENSG00000139180 | NDUFA9    | 0.362740873 | 2.466666667 |
| ENSG00000139220 | PPFIA2    | 0.362740873 | 2.466666667 |
| ENSG00000140093 | SERPINA10 | 0.362740873 | 2.466666667 |
| ENSG00000140675 | SLC5A2    | 0.362740873 | 2.466666667 |
| ENSG00000140941 | MAP1LC3B  | 0.362740873 | 2.466666667 |
| ENSG00000141179 | PCTP      | 0.362740873 | 2.466666667 |
| ENSG00000141338 | ABCA8     | 0.362740873 | 2.466666667 |
| ENSG00000141456 | PELP1     | 0.362740873 | 2.466666667 |
| ENSG00000141560 | FN3KRP    | 0.362740873 | 2.466666667 |
| ENSG00000141837 | CACNA1A   | 0.362740873 | 2.466666667 |
| ENSG00000142065 | ZFP14     | 0.362740873 | 2.466666667 |
| ENSG00000142102 | ATHL1     | 0.362740873 | 2.466666667 |
| ENSG00000142173 | COL6A2    | 0.362740873 | 2.466666667 |
| ENSG00000142273 | CBLC      | 0.362740873 | 2.466666667 |

|                 |          |             |             |
|-----------------|----------|-------------|-------------|
| ENSG00000142330 | CAPN10   | 0.362740873 | 2.466666667 |
| ENSG00000142408 | CACNG8   | 0.362740873 | 2.466666667 |
| ENSG00000142686 | C1orf216 | 0.362740873 | 2.466666667 |
| ENSG00000143149 | ALDH9A1  | 0.362740873 | 2.466666667 |
| ENSG00000143157 | POGK     | 0.362740873 | 2.466666667 |
| ENSG00000143512 | HHIPL2   | 0.362740873 | 2.466666667 |
| ENSG00000143970 | ASXL2    | 0.362740873 | 2.466666667 |
| ENSG00000144746 | ARL6IP5  | 0.362740873 | 2.466666667 |
| ENSG00000145721 | LIX1     | 0.362740873 | 2.466666667 |
| ENSG00000145979 | TBC1D7   | 0.362740873 | 2.466666667 |
| ENSG00000146700 | SRCRB4D  | 0.362740873 | 2.466666667 |
| ENSG00000148468 | FAM171A1 | 0.362740873 | 2.466666667 |
| ENSG00000148702 | HABP2    | 0.362740873 | 2.466666667 |
| ENSG00000149133 | OR5F1    | 0.362740873 | 2.466666667 |
| ENSG00000149308 | NPAT     | 0.362740873 | 2.466666667 |
| ENSG00000149761 | NUDT22   | 0.362740873 | 2.466666667 |
| ENSG00000151615 | POU4F2   | 0.362740873 | 2.466666667 |
| ENSG00000151687 | ANKAR    | 0.362740873 | 2.466666667 |
| ENSG00000151806 | GUF1     | 0.362740873 | 2.466666667 |
| ENSG00000151846 | PABPC3   | 0.362740873 | 2.466666667 |
| ENSG00000151952 | TMEM132D | 0.362740873 | 2.466666667 |
| ENSG00000152193 | RNF219   | 0.362740873 | 2.466666667 |
| ENSG00000152465 | NMT2     | 0.362740873 | 2.466666667 |
| ENSG00000152520 | PAN3     | 0.362740873 | 2.466666667 |
| ENSG00000153060 | TEKT5    | 0.362740873 | 2.466666667 |
| ENSG00000153391 | INO80C   | 0.362740873 | 2.466666667 |
| ENSG00000153789 | FAM92B   | 0.362740873 | 2.466666667 |
| ENSG00000154118 | JPH3     | 0.362740873 | 2.466666667 |
| ENSG00000154174 | TOMM70A  | 0.362740873 | 2.466666667 |
| ENSG00000154262 | ABCA6    | 0.362740873 | 2.466666667 |
| ENSG00000154263 | ABCA10   | 0.362740873 | 2.466666667 |
| ENSG00000155052 | CNTNAP5  | 0.362740873 | 2.466666667 |
| ENSG00000155093 | PTPRN2   | 0.362740873 | 2.466666667 |
| ENSG00000155640 | C10orf12 | 0.362740873 | 2.466666667 |
| ENSG00000156510 | HKDC1    | 0.362740873 | 2.466666667 |
| ENSG00000156860 | FBRS     | 0.362740873 | 2.466666667 |
| ENSG00000156869 | FRRS1    | 0.362740873 | 2.466666667 |
| ENSG00000156990 | RPUSD3   | 0.362740873 | 2.466666667 |
| ENSG00000157184 | CPT2     | 0.362740873 | 2.466666667 |
| ENSG00000157703 | SVOPL    | 0.362740873 | 2.466666667 |
| ENSG00000158006 | PAFAH2   | 0.362740873 | 2.466666667 |
| ENSG00000158077 | NLRP14   | 0.362740873 | 2.466666667 |
| ENSG00000158528 | PPP1R9A  | 0.362740873 | 2.466666667 |
| ENSG00000159128 | IFNGR2   | 0.362740873 | 2.466666667 |
| ENSG00000159197 | KCNE2    | 0.362740873 | 2.466666667 |
| ENSG00000159212 | CLIC6    | 0.362740873 | 2.466666667 |
| ENSG00000159256 | MORC3    | 0.362740873 | 2.466666667 |

|                 |          |             |             |
|-----------------|----------|-------------|-------------|
| ENSG00000160161 | CILP2    | 0.362740873 | 2.466666667 |
| ENSG00000160190 | SLC37A1  | 0.362740873 | 2.466666667 |
| ENSG00000160679 | CHTOP    | 0.362740873 | 2.466666667 |
| ENSG00000160746 | ANO10    | 0.362740873 | 2.466666667 |
| ENSG00000160803 | UBQLN4   | 0.362740873 | 2.466666667 |
| ENSG00000160957 | RECQL4   | 0.362740873 | 2.466666667 |
| ENSG00000161021 | MAML1    | 0.362740873 | 2.466666667 |
| ENSG00000162365 | CYP4A22  | 0.362740873 | 2.466666667 |
| ENSG00000162434 | JAK1     | 0.362740873 | 2.466666667 |
| ENSG00000162618 | ELTD1    | 0.362740873 | 2.466666667 |
| ENSG00000162645 | GBP2     | 0.362740873 | 2.466666667 |
| ENSG00000162949 | CAPN13   | 0.362740873 | 2.466666667 |
| ENSG00000163071 | SPATA18  | 0.362740873 | 2.466666667 |
| ENSG00000163312 | HELQ     | 0.362740873 | 2.466666667 |
| ENSG00000163362 | C1orf106 | 0.362740873 | 2.466666667 |
| ENSG00000163507 | KIAA1524 | 0.362740873 | 2.466666667 |
| ENSG00000163581 | SLC2A2   | 0.362740873 | 2.466666667 |
| ENSG00000163701 | IL17RE   | 0.362740873 | 2.466666667 |
| ENSG00000164125 | FAM198B  | 0.362740873 | 2.466666667 |
| ENSG00000164270 | HTR4     | 0.362740873 | 2.466666667 |
| ENSG00000164403 | SHROOM1  | 0.362740873 | 2.466666667 |
| ENSG00000164458 | T        | 0.362740873 | 2.466666667 |
| ENSG00000164776 | PHKG1    | 0.362740873 | 2.466666667 |
| ENSG00000164855 | TMEM184A | 0.362740873 | 2.466666667 |
| ENSG00000165458 | INPPL1   | 0.362740873 | 2.466666667 |
| ENSG00000165650 | PDZD8    | 0.362740873 | 2.466666667 |
| ENSG00000165841 | CYP2C19  | 0.362740873 | 2.466666667 |
| ENSG00000165959 | CLMN     | 0.362740873 | 2.466666667 |
| ENSG00000166126 | AMN      | 0.362740873 | 2.466666667 |
| ENSG00000166199 | ALKBH3   | 0.362740873 | 2.466666667 |
| ENSG00000166278 | C2       | 0.362740873 | 2.466666667 |
| ENSG00000166313 | APBB1    | 0.362740873 | 2.466666667 |
| ENSG00000166884 | OR4D6    | 0.362740873 | 2.466666667 |
| ENSG00000166896 | XRCC6BP1 | 0.362740873 | 2.466666667 |
| ENSG00000167208 | SNX20    | 0.362740873 | 2.466666667 |
| ENSG00000167555 | ZNF528   | 0.362740873 | 2.466666667 |
| ENSG00000167969 | ECI1     | 0.362740873 | 2.466666667 |
| ENSG00000168092 | PAFAH1B2 | 0.362740873 | 2.466666667 |
| ENSG00000169126 | ARMC4    | 0.362740873 | 2.466666667 |
| ENSG00000169717 | ACTRT2   | 0.362740873 | 2.466666667 |
| ENSG00000170264 | FAM161A  | 0.362740873 | 2.466666667 |
| ENSG00000170265 | ZNF282   | 0.362740873 | 2.466666667 |
| ENSG00000170289 | CNGB3    | 0.362740873 | 2.466666667 |
| ENSG00000170613 | FAM71B   | 0.362740873 | 2.466666667 |
| ENSG00000170745 | KCNS3    | 0.362740873 | 2.466666667 |
| ENSG00000170779 | CDCA4    | 0.362740873 | 2.466666667 |
| ENSG00000171004 | HS6ST2   | 0.362740873 | 2.466666667 |

|                 |           |             |             |
|-----------------|-----------|-------------|-------------|
| ENSG00000171103 | TRMT61B   | 0.362740873 | 2.466666667 |
| ENSG00000171155 | C1GALT1C1 | 0.362740873 | 2.466666667 |
| ENSG00000171243 | SOSTDC1   | 0.362740873 | 2.466666667 |
| ENSG00000171459 | OR1L6     | 0.362740873 | 2.466666667 |
| ENSG00000171561 | OR2AT4    | 0.362740873 | 2.466666667 |
| ENSG00000171634 | BPTF      | 0.362740873 | 2.466666667 |
| ENSG00000171790 | SLFNL1    | 0.362740873 | 2.466666667 |
| ENSG00000172000 | ZNF556    | 0.362740873 | 2.466666667 |
| ENSG00000172377 | OR9I1     | 0.362740873 | 2.466666667 |
| ENSG00000172457 | OR9G4     | 0.362740873 | 2.466666667 |
| ENSG00000172774 | OR1S1     | 0.362740873 | 2.466666667 |
| ENSG00000172940 | SLC22A13  | 0.362740873 | 2.466666667 |
| ENSG00000173535 | TNFRSF10C | 0.362740873 | 2.466666667 |
| ENSG00000173744 | AGFG1     | 0.362740873 | 2.466666667 |
| ENSG00000174125 | TLR1      | 0.362740873 | 2.466666667 |
| ENSG00000174640 | SLCO2A1   | 0.362740873 | 2.466666667 |
| ENSG00000174667 | OR7D4     | 0.362740873 | 2.466666667 |
| ENSG00000174928 | C3orf33   | 0.362740873 | 2.466666667 |
| ENSG00000174957 | OR5J2     | 0.362740873 | 2.466666667 |
| ENSG00000175548 | ALG10B    | 0.362740873 | 2.466666667 |
| ENSG00000175634 | RPS6KB2   | 0.362740873 | 2.466666667 |
| ENSG00000175664 | TEX26     | 0.362740873 | 2.466666667 |
| ENSG00000176170 | SPHK1     | 0.362740873 | 2.466666667 |
| ENSG00000176236 | C10orf111 | 0.362740873 | 2.466666667 |
| ENSG00000176239 | OR51B6    | 0.362740873 | 2.466666667 |
| ENSG00000176531 | PHLDB3    | 0.362740873 | 2.466666667 |
| ENSG00000176571 | CNBD1     | 0.362740873 | 2.466666667 |
| ENSG00000176937 | OR52R1    | 0.362740873 | 2.466666667 |
| ENSG00000177034 | MTX3      | 0.362740873 | 2.466666667 |
| ENSG00000177302 | TOP3A     | 0.362740873 | 2.466666667 |
| ENSG00000177575 | CD163     | 0.362740873 | 2.466666667 |
| ENSG00000177663 | IL17RA    | 0.362740873 | 2.466666667 |
| ENSG00000177938 | CAPZA3    | 0.362740873 | 2.466666667 |
| ENSG00000178222 | RNF212    | 0.362740873 | 2.466666667 |
| ENSG00000178623 | GPR35     | 0.362740873 | 2.466666667 |
| ENSG00000179021 | C3orf38   | 0.362740873 | 2.466666667 |
| ENSG00000179071 | CCDC89    | 0.362740873 | 2.466666667 |
| ENSG00000179094 | PER1      | 0.362740873 | 2.466666667 |
| ENSG00000179097 | HTR1F     | 0.362740873 | 2.466666667 |
| ENSG00000179262 | RAD23A    | 0.362740873 | 2.466666667 |
| ENSG00000179284 | DAND5     | 0.362740873 | 2.466666667 |
| ENSG00000180881 | CAPS2     | 0.362740873 | 2.466666667 |
| ENSG00000181085 | MAPK15    | 0.362740873 | 2.466666667 |
| ENSG00000181315 | ZNF322    | 0.362740873 | 2.466666667 |
| ENSG00000181778 | TMEM252   | 0.362740873 | 2.466666667 |
| ENSG00000182199 | SHMT2     | 0.362740873 | 2.466666667 |
| ENSG00000182489 | XKRX      | 0.362740873 | 2.466666667 |

|                 |           |             |             |
|-----------------|-----------|-------------|-------------|
| ENSG00000182533 | CAV3      | 0.362740873 | 2.466666667 |
| ENSG00000182568 | SATB1     | 0.362740873 | 2.466666667 |
| ENSG00000182613 | OR2V2     | 0.362740873 | 2.466666667 |
| ENSG00000182621 | PLCB1     | 0.362740873 | 2.466666667 |
| ENSG00000183161 | FANCF     | 0.362740873 | 2.466666667 |
| ENSG00000183960 | KCNH8     | 0.362740873 | 2.466666667 |
| ENSG00000184154 | LRTOMT    | 0.362740873 | 2.466666667 |
| ENSG00000184730 | APOBR     | 0.362740873 | 2.466666667 |
| ENSG00000185069 | KRT76     | 0.362740873 | 2.466666667 |
| ENSG00000185261 | KIAA0825  | 0.362740873 | 2.466666667 |
| ENSG00000185272 | RBM11     | 0.362740873 | 2.466666667 |
| ENSG00000185559 | DLK1      | 0.362740873 | 2.466666667 |
| ENSG00000185585 | OLFML2A   | 0.362740873 | 2.466666667 |
| ENSG00000185803 | SLC52A2   | 0.362740873 | 2.466666667 |
| ENSG00000186583 | SPATC1    | 0.362740873 | 2.466666667 |
| ENSG00000186866 | POFUT2    | 0.362740873 | 2.466666667 |
| ENSG00000187701 | OR2T27    | 0.362740873 | 2.466666667 |
| ENSG00000187862 | TTC24     | 0.362740873 | 2.466666667 |
| ENSG00000187918 | OR51I2    | 0.362740873 | 2.466666667 |
| ENSG00000188811 | NHLRC3    | 0.362740873 | 2.466666667 |
| ENSG00000188868 | ZNF563    | 0.362740873 | 2.466666667 |
| ENSG00000188906 | LRRK2     | 0.362740873 | 2.466666667 |
| ENSG00000188991 | SLC15A5   | 0.362740873 | 2.466666667 |
| ENSG00000189099 | PRSS48    | 0.362740873 | 2.466666667 |
| ENSG00000196099 | OR6M1     | 0.362740873 | 2.466666667 |
| ENSG00000196189 | SEMA4A    | 0.362740873 | 2.466666667 |
| ENSG00000196547 | MAN2A2    | 0.362740873 | 2.466666667 |
| ENSG00000196781 | TLE1      | 0.362740873 | 2.466666667 |
| ENSG00000197472 | ZNF695    | 0.362740873 | 2.466666667 |
| ENSG00000197561 | ELANE     | 0.362740873 | 2.466666667 |
| ENSG00000197563 | PIGN      | 0.362740873 | 2.466666667 |
| ENSG00000197619 | ZNF615    | 0.362740873 | 2.466666667 |
| ENSG00000197706 | OR6C74    | 0.362740873 | 2.466666667 |
| ENSG00000197912 | SPG7      | 0.362740873 | 2.466666667 |
| ENSG00000198477 | ZNF280B   | 0.362740873 | 2.466666667 |
| ENSG00000198704 | GPX6      | 0.362740873 | 2.466666667 |
| ENSG00000198711 | SSBP3-AS1 | 0.362740873 | 2.466666667 |
| ENSG00000198746 | GPATCH3   | 0.362740873 | 2.466666667 |
| ENSG00000198824 | CHAMP1    | 0.362740873 | 2.466666667 |
| ENSG00000198836 | OPA1      | 0.362740873 | 2.466666667 |
| ENSG00000198862 | LTN1      | 0.362740873 | 2.466666667 |
| ENSG00000198912 | C1orf174  | 0.362740873 | 2.466666667 |
| ENSG00000203734 | ECT2L     | 0.362740873 | 2.466666667 |
| ENSG00000204161 | C10orf128 | 0.362740873 | 2.466666667 |
| ENSG00000204256 | BRD2      | 0.362740873 | 2.466666667 |
| ENSG00000204305 | AGER      | 0.362740873 | 2.466666667 |
| ENSG00000204438 | GPANK1    | 0.362740873 | 2.466666667 |

|                 |              |             |             |
|-----------------|--------------|-------------|-------------|
| ENSG00000204475 | NCR3         | 0.362740873 | 2.466666667 |
| ENSG00000204574 | ABCF1        | 0.362740873 | 2.466666667 |
| ENSG00000204614 | TRIM40       | 0.362740873 | 2.466666667 |
| ENSG00000204688 | OR2H1        | 0.362740873 | 2.466666667 |
| ENSG00000204703 | OR2B3        | 0.362740873 | 2.466666667 |
| ENSG00000204843 | DCTN1        | 0.362740873 | 2.466666667 |
| ENSG00000205045 | SLFN12L      | 0.362740873 | 2.466666667 |
| ENSG00000205189 | ZBTB10       | 0.362740873 | 2.466666667 |
| ENSG00000205730 | ITPRIPL2     | 0.362740873 | 2.466666667 |
| ENSG00000211654 | IGLV5-37     | 0.362740873 | 2.466666667 |
| ENSG00000211944 | IGHV3-16     | 0.362740873 | 2.466666667 |
| ENSG00000213240 | NOTCH2NL     | 0.362740873 | 2.466666667 |
| ENSG00000213920 | MDP1         | 0.362740873 | 2.466666667 |
| ENSG00000214253 | FIS1         | 0.362740873 | 2.466666667 |
| ENSG00000215187 | FAM166B      | 0.362740873 | 2.466666667 |
| ENSG00000215568 | GAB4         | 0.362740873 | 2.466666667 |
| ENSG00000215883 | CYB5RL       | 0.362740873 | 2.466666667 |
| ENSG00000219073 | CELA3B       | 0.362740873 | 2.466666667 |
| ENSG00000221890 | NPTXR        | 0.362740873 | 2.466666667 |
| ENSG00000221986 | MYBPHL       | 0.362740873 | 2.466666667 |
| ENSG00000232125 | DYTN         | 0.362740873 | 2.466666667 |
| ENSG00000233280 | CRYBG3       | 0.362740873 | 2.466666667 |
| ENSG00000240197 | AC010518.3   | 0.362740873 | 2.466666667 |
| ENSG00000240542 | KRTAP9-1     | 0.362740873 | 2.466666667 |
| ENSG00000241644 | INMT         | 0.362740873 | 2.466666667 |
| ENSG00000241852 | C8orf58      | 0.362740873 | 2.466666667 |
| ENSG00000242372 | EIF6         | 0.362740873 | 2.466666667 |
| ENSG00000242950 | ERVW-1       | 0.362740873 | 2.466666667 |
| ENSG00000243284 | VSIG8        | 0.362740873 | 2.466666667 |
| ENSG00000243710 | WDR65        | 0.362740873 | 2.466666667 |
| ENSG00000248235 | AC037459.4   | 0.362740873 | 2.466666667 |
| ENSG00000248919 | ATP5J2-PTCD1 | 0.362740873 | 2.466666667 |
| ENSG00000251692 | PTX4         | 0.362740873 | 2.466666667 |
| ENSG00000254221 | PCDHGB1      | 0.362740873 | 2.466666667 |
| ENSG00000255103 | KIAA0754     | 0.362740873 | 2.466666667 |
| ENSG00000255526 | NEDD8-MDP1   | 0.362740873 | 2.466666667 |
| ENSG00000257365 | FNTB         | 0.362740873 | 2.466666667 |
| ENSG00000258289 | CHURC1       | 0.362740873 | 2.466666667 |
| ENSG00000263002 | ZNF234       | 0.362740873 | 2.466666667 |
| ENSG00000267157 | CTB-54O9.9   | 0.362740873 | 2.466666667 |
| ENSG00000269699 | ZIM2         | 0.362740873 | 2.466666667 |
| ENSG00000075539 | FRYL         | 0.366354416 | 1.786427146 |
| ENSG00000100731 | PCNX         | 0.366354416 | 1.786427146 |
| ENSG00000130723 | PRRC2B       | 0.366354416 | 1.786427146 |
| ENSG00000132549 | VPS13B       | 0.366354416 | 1.786427146 |
| ENSG00000152104 | PTPN14       | 0.366354416 | 1.786427146 |
| ENSG00000153993 | SEMA3D       | 0.366354416 | 1.786427146 |

|                 |          |             |             |
|-----------------|----------|-------------|-------------|
| ENSG00000158553 | POM121L2 | 0.366354416 | 1.786427146 |
| ENSG00000167548 | KMT2D    | 0.366354416 | 1.786427146 |
| ENSG00000168334 | XIRP1    | 0.366354416 | 1.786427146 |
| ENSG00000168477 | TNXB     | 0.366354416 | 1.786427146 |
| ENSG00000172752 | COL6A5   | 0.366354416 | 1.786427146 |
| ENSG00000176225 | RTTN     | 0.366354416 | 1.786427146 |
| ENSG00000204301 | NOTCH4   | 0.366354416 | 1.786427146 |
| ENSG00000139618 | BRCA2    | 0.3683846   | 1.549405772 |
| ENSG00000066933 | MYO9A    | 0.368418014 | 0.333333333 |
| ENSG00000101104 | PABPC1L  | 0.368418014 | 0.333333333 |
| ENSG00000104774 | MAN2B1   | 0.368418014 | 0.333333333 |
| ENSG00000116962 | NID1     | 0.368418014 | 0.333333333 |
| ENSG00000117640 | MTFR1L   | 0.368418014 | 0.333333333 |
| ENSG00000119596 | YLPM1    | 0.368418014 | 0.333333333 |
| ENSG00000125885 | MCM8     | 0.368418014 | 0.333333333 |
| ENSG00000138642 | HERC6    | 0.368418014 | 0.333333333 |
| ENSG00000141161 | UNC45B   | 0.368418014 | 0.333333333 |
| ENSG00000142156 | COL6A1   | 0.368418014 | 0.333333333 |
| ENSG00000148513 | ANKRD30A | 0.368418014 | 0.333333333 |
| ENSG00000151276 | MAGI1    | 0.368418014 | 0.333333333 |
| ENSG00000154269 | ENPP3    | 0.368418014 | 0.333333333 |
| ENSG00000154856 | APCDD1   | 0.368418014 | 0.333333333 |
| ENSG00000158104 | HPD      | 0.368418014 | 0.333333333 |
| ENSG00000163513 | TGFBR2   | 0.368418014 | 0.333333333 |
| ENSG00000164169 | PRMT10   | 0.368418014 | 0.333333333 |
| ENSG00000166343 | MSS51    | 0.368418014 | 0.333333333 |
| ENSG00000167972 | ABCA3    | 0.368418014 | 0.333333333 |
| ENSG00000169946 | ZFPM2    | 0.368418014 | 0.333333333 |
| ENSG00000170703 | TTLL6    | 0.368418014 | 0.333333333 |
| ENSG00000173679 | OR1L1    | 0.368418014 | 0.333333333 |
| ENSG00000181378 | CCDC108  | 0.368418014 | 0.333333333 |
| ENSG00000185745 | IFIT1    | 0.368418014 | 0.333333333 |
| ENSG00000187244 | BCAM     | 0.368418014 | 0.333333333 |
| ENSG00000196600 | SLC22A25 | 0.368418014 | 0.333333333 |
| ENSG00000197415 | VEPH1    | 0.368418014 | 0.333333333 |
| ENSG00000214595 | EML6     | 0.368418014 | 0.333333333 |
| ENSG00000036448 | MYOM2    | 0.372093556 | 0.523291397 |
| ENSG00000179532 | DNHD1    | 0.385394195 | 1.507314037 |
| ENSG00000163629 | PTPN13   | 0.400365437 | 1.65785124  |
| ENSG00000171714 | ANO5     | 0.400365437 | 1.65785124  |
| ENSG00000185842 | DNAH14   | 0.400365437 | 1.65785124  |
| ENSG00000189056 | RELN     | 0.400365437 | 1.65785124  |
| ENSG00000131018 | SYNE1    | 0.400694038 | 1.472790095 |
| ENSG00000055609 | KMT2C    | 0.428822317 | 1.569136385 |
| ENSG00000160145 | KALRN    | 0.428822317 | 1.569136385 |
| ENSG00000164694 | FNDC1    | 0.428822317 | 1.569136385 |
| ENSG00000003989 | SLC7A2   | 0.439005656 | 1.904046243 |

|                 |          |             |             |
|-----------------|----------|-------------|-------------|
| ENSG00000005483 | KMT2E    | 0.439005656 | 1.904046243 |
| ENSG00000019186 | CYP24A1  | 0.439005656 | 1.904046243 |
| ENSG00000021762 | OSBPL5   | 0.439005656 | 1.904046243 |
| ENSG00000027644 | INSRR    | 0.439005656 | 1.904046243 |
| ENSG00000047936 | ROS1     | 0.439005656 | 1.904046243 |
| ENSG00000067798 | NAV3     | 0.439005656 | 1.904046243 |
| ENSG00000073331 | ALPK1    | 0.439005656 | 1.904046243 |
| ENSG00000074755 | ZZEF1    | 0.439005656 | 1.904046243 |
| ENSG00000076944 | STXBP2   | 0.439005656 | 1.904046243 |
| ENSG00000078814 | MYH7B    | 0.439005656 | 1.904046243 |
| ENSG00000081386 | ZNF510   | 0.439005656 | 1.904046243 |
| ENSG00000088827 | SIGLEC1  | 0.439005656 | 1.904046243 |
| ENSG00000095015 | MAP3K1   | 0.439005656 | 1.904046243 |
| ENSG00000100325 | ASCC2    | 0.439005656 | 1.904046243 |
| ENSG00000100393 | EP300    | 0.439005656 | 1.904046243 |
| ENSG00000100504 | PYGL     | 0.439005656 | 1.904046243 |
| ENSG00000101782 | RIOK3    | 0.439005656 | 1.904046243 |
| ENSG00000103196 | CRISPLD2 | 0.439005656 | 1.904046243 |
| ENSG00000104763 | ASAH1    | 0.439005656 | 1.904046243 |
| ENSG00000104892 | KLC3     | 0.439005656 | 1.904046243 |
| ENSG00000105143 | SLC1A6   | 0.439005656 | 1.904046243 |
| ENSG00000105198 | LGALS13  | 0.439005656 | 1.904046243 |
| ENSG00000106511 | MEOX2    | 0.439005656 | 1.904046243 |
| ENSG00000110090 | CPT1A    | 0.439005656 | 1.904046243 |
| ENSG00000112118 | MCM3     | 0.439005656 | 1.904046243 |
| ENSG00000112655 | PTK7     | 0.439005656 | 1.904046243 |
| ENSG00000113645 | WWC1     | 0.439005656 | 1.904046243 |
| ENSG00000114867 | EIF4G1   | 0.439005656 | 1.904046243 |
| ENSG00000115523 | GNLY     | 0.439005656 | 1.904046243 |
| ENSG00000115568 | ZNF142   | 0.439005656 | 1.904046243 |
| ENSG00000115593 | SMYD1    | 0.439005656 | 1.904046243 |
| ENSG00000115705 | TPO      | 0.439005656 | 1.904046243 |
| ENSG00000117400 | MPL      | 0.439005656 | 1.904046243 |
| ENSG00000119703 | ZC2HC1C  | 0.439005656 | 1.904046243 |
| ENSG00000121316 | PLBD1    | 0.439005656 | 1.904046243 |
| ENSG00000121753 | BAI2     | 0.439005656 | 1.904046243 |
| ENSG00000121898 | CPXM2    | 0.439005656 | 1.904046243 |
| ENSG00000122870 | BICC1    | 0.439005656 | 1.904046243 |
| ENSG00000123552 | USP45    | 0.439005656 | 1.904046243 |
| ENSG00000123607 | TTC21B   | 0.439005656 | 1.904046243 |
| ENSG00000124126 | PREX1    | 0.439005656 | 1.904046243 |
| ENSG00000124749 | COL21A1  | 0.439005656 | 1.904046243 |
| ENSG00000126838 | PZP      | 0.439005656 | 1.904046243 |
| ENSG00000128641 | MYO1B    | 0.439005656 | 1.904046243 |
| ENSG00000129219 | PLD2     | 0.439005656 | 1.904046243 |
| ENSG00000129353 | SLC44A2  | 0.439005656 | 1.904046243 |
| ENSG00000130635 | COL5A1   | 0.439005656 | 1.904046243 |

|                 |          |             |             |
|-----------------|----------|-------------|-------------|
| ENSG00000130997 | POLN     | 0.439005656 | 1.904046243 |
| ENSG00000132182 | NUP210   | 0.439005656 | 1.904046243 |
| ENSG00000132275 | RRP8     | 0.439005656 | 1.904046243 |
| ENSG00000132436 | FIGNL1   | 0.439005656 | 1.904046243 |
| ENSG00000132854 | KANK4    | 0.439005656 | 1.904046243 |
| ENSG00000132915 | PDE6A    | 0.439005656 | 1.904046243 |
| ENSG00000132938 | MTUS2    | 0.439005656 | 1.904046243 |
| ENSG00000133105 | RXFP2    | 0.439005656 | 1.904046243 |
| ENSG00000134352 | IL6ST    | 0.439005656 | 1.904046243 |
| ENSG00000134640 | MTNR1B   | 0.439005656 | 1.904046243 |
| ENSG00000134897 | BIVM     | 0.439005656 | 1.904046243 |
| ENSG00000135535 | CD164    | 0.439005656 | 1.904046243 |
| ENSG00000135744 | AGT      | 0.439005656 | 1.904046243 |
| ENSG00000135837 | CEP350   | 0.439005656 | 1.904046243 |
| ENSG00000135972 | MRPS9    | 0.439005656 | 1.904046243 |
| ENSG00000136040 | PLXNC1   | 0.439005656 | 1.904046243 |
| ENSG00000136051 | KIAA1033 | 0.439005656 | 1.904046243 |
| ENSG00000136111 | TBC1D4   | 0.439005656 | 1.904046243 |
| ENSG00000136449 | MYCBPAP  | 0.439005656 | 1.904046243 |
| ENSG00000136514 | RTP4     | 0.439005656 | 1.904046243 |
| ENSG00000138231 | DBR1     | 0.439005656 | 1.904046243 |
| ENSG00000139218 | SCAF11   | 0.439005656 | 1.904046243 |
| ENSG00000140326 | CDAN1    | 0.439005656 | 1.904046243 |
| ENSG00000140598 | EFTUD1   | 0.439005656 | 1.904046243 |
| ENSG00000141577 | AZI1     | 0.439005656 | 1.904046243 |
| ENSG00000142733 | MAP3K6   | 0.439005656 | 1.904046243 |
| ENSG00000143434 | SEMA6C   | 0.439005656 | 1.904046243 |
| ENSG00000143748 | NVL      | 0.439005656 | 1.904046243 |
| ENSG00000144550 | CPNE9    | 0.439005656 | 1.904046243 |
| ENSG00000145740 | SLC30A5  | 0.439005656 | 1.904046243 |
| ENSG00000147459 | DOCK5    | 0.439005656 | 1.904046243 |
| ENSG00000149256 | TENM4    | 0.439005656 | 1.904046243 |
| ENSG00000151413 | NUBPL    | 0.439005656 | 1.904046243 |
| ENSG00000152223 | EPG5     | 0.439005656 | 1.904046243 |
| ENSG00000158865 | SLC5A11  | 0.439005656 | 1.904046243 |
| ENSG00000159753 | RLTPR    | 0.439005656 | 1.904046243 |
| ENSG00000160294 | MCM3AP   | 0.439005656 | 1.904046243 |
| ENSG00000160447 | PKN3     | 0.439005656 | 1.904046243 |
| ENSG00000161664 | ASB16    | 0.439005656 | 1.904046243 |
| ENSG00000162006 | MSLNL    | 0.439005656 | 1.904046243 |
| ENSG00000162104 | ADCY9    | 0.439005656 | 1.904046243 |
| ENSG00000162572 | SCNN1D   | 0.439005656 | 1.904046243 |
| ENSG00000163104 | SMARCAD1 | 0.439005656 | 1.904046243 |
| ENSG00000163156 | SCNM1    | 0.439005656 | 1.904046243 |
| ENSG00000163157 | TMOD4    | 0.439005656 | 1.904046243 |
| ENSG00000163534 | FCRL1    | 0.439005656 | 1.904046243 |
| ENSG00000164483 | SAMD3    | 0.439005656 | 1.904046243 |

|                 |              |             |             |
|-----------------|--------------|-------------|-------------|
| ENSG00000165181 | C9orf84      | 0.439005656 | 1.904046243 |
| ENSG00000165392 | WRN          | 0.439005656 | 1.904046243 |
| ENSG00000165684 | SNAPC4       | 0.439005656 | 1.904046243 |
| ENSG00000166436 | TRIM66       | 0.439005656 | 1.904046243 |
| ENSG00000166535 | A2ML1        | 0.439005656 | 1.904046243 |
| ENSG00000167723 | TRPV3        | 0.439005656 | 1.904046243 |
| ENSG00000167880 | EVPL         | 0.439005656 | 1.904046243 |
| ENSG00000168497 | SDPR         | 0.439005656 | 1.904046243 |
| ENSG00000168528 | SERINC2      | 0.439005656 | 1.904046243 |
| ENSG00000168746 | C20orf62     | 0.439005656 | 1.904046243 |
| ENSG00000169258 | GPRIN1       | 0.439005656 | 1.904046243 |
| ENSG00000169710 | FASN         | 0.439005656 | 1.904046243 |
| ENSG00000170209 | ANKK1        | 0.439005656 | 1.904046243 |
| ENSG00000171094 | ALK          | 0.439005656 | 1.904046243 |
| ENSG00000171446 | KRT27        | 0.439005656 | 1.904046243 |
| ENSG00000171970 | ZNF57        | 0.439005656 | 1.904046243 |
| ENSG00000172273 | HINFP        | 0.439005656 | 1.904046243 |
| ENSG00000172428 | MYEOV2       | 0.439005656 | 1.904046243 |
| ENSG00000172771 | EFCAB12      | 0.439005656 | 1.904046243 |
| ENSG00000172828 | CES3         | 0.439005656 | 1.904046243 |
| ENSG00000172987 | HPSE2        | 0.439005656 | 1.904046243 |
| ENSG00000173210 | ABLIM3       | 0.439005656 | 1.904046243 |
| ENSG00000173588 | CCDC41       | 0.439005656 | 1.904046243 |
| ENSG00000174109 | C16orf91     | 0.439005656 | 1.904046243 |
| ENSG00000174718 | KIAA1551     | 0.439005656 | 1.904046243 |
| ENSG00000177169 | ULK1         | 0.439005656 | 1.904046243 |
| ENSG00000178297 | TMPRSS9      | 0.439005656 | 1.904046243 |
| ENSG00000179270 | C2orf71      | 0.439005656 | 1.904046243 |
| ENSG00000181192 | DHTKD1       | 0.439005656 | 1.904046243 |
| ENSG00000181577 | C6orf223     | 0.439005656 | 1.904046243 |
| ENSG00000183347 | GBP6         | 0.439005656 | 1.904046243 |
| ENSG00000185294 | SPPL2C       | 0.439005656 | 1.904046243 |
| ENSG00000185722 | ANKFY1       | 0.439005656 | 1.904046243 |
| ENSG00000186815 | TPCN1        | 0.439005656 | 1.904046243 |
| ENSG00000187741 | FANCA        | 0.439005656 | 1.904046243 |
| ENSG00000188037 | CLCN1        | 0.439005656 | 1.904046243 |
| ENSG00000188050 | RNF133       | 0.439005656 | 1.904046243 |
| ENSG00000188112 | C6orf132     | 0.439005656 | 1.904046243 |
| ENSG00000188175 | HEPACAM2     | 0.439005656 | 1.904046243 |
| ENSG00000188266 | HYKK         | 0.439005656 | 1.904046243 |
| ENSG00000188501 | LCTL         | 0.439005656 | 1.904046243 |
| ENSG00000188641 | DPYD         | 0.439005656 | 1.904046243 |
| ENSG00000188897 | CTD-3088G3.8 | 0.439005656 | 1.904046243 |
| ENSG00000197054 | ZNF763       | 0.439005656 | 1.904046243 |
| ENSG00000197177 | GPR123       | 0.439005656 | 1.904046243 |
| ENSG00000198722 | UNC13B       | 0.439005656 | 1.904046243 |
| ENSG00000204131 | NHSL2        | 0.439005656 | 1.904046243 |

|                 |            |             |             |
|-----------------|------------|-------------|-------------|
| ENSG00000204610 | TRIM15     | 0.439005656 | 1.904046243 |
| ENSG00000215375 | MYL5       | 0.439005656 | 1.904046243 |
| ENSG00000228727 | SAPCD1     | 0.439005656 | 1.904046243 |
| ENSG00000235268 | KDM4E      | 0.439005656 | 1.904046243 |
| ENSG00000243789 | JMJD7      | 0.439005656 | 1.904046243 |
| ENSG00000257315 | ZBED6      | 0.439005656 | 1.904046243 |
| ENSG00000263155 | MYZAP      | 0.439005656 | 1.904046243 |
| ENSG00000267179 | ZNF763     | 0.439005656 | 1.904046243 |
| ENSG00000120549 | KIAA1217   | 0.444417177 | 0.454545455 |
| ENSG00000128591 | FLNC       | 0.444417177 | 0.454545455 |
| ENSG00000140386 | SCAPER     | 0.444417177 | 0.454545455 |
| ENSG00000157578 | LCA5L      | 0.444417177 | 0.454545455 |
| ENSG00000160200 | CBS        | 0.444417177 | 0.454545455 |
| ENSG00000166689 | PLEKHA7    | 0.444417177 | 0.454545455 |
| ENSG00000176542 | KIAA2018   | 0.444417177 | 0.454545455 |
| ENSG00000158683 | PKD1L1     | 0.473891078 | 1.455049945 |
| ENSG00000205038 | PKHD1L1    | 0.473891078 | 1.455049945 |
| ENSG00000001629 | ANKIB1     | 0.491803279 | 3.134078212 |
| ENSG00000003436 | TFPI       | 0.491803279 | 3.134078212 |
| ENSG00000003987 | MTMR7      | 0.491803279 | 3.134078212 |
| ENSG00000004961 | HCCS       | 0.491803279 | 3.134078212 |
| ENSG00000005156 | LIG3       | 0.491803279 | 3.134078212 |
| ENSG00000005189 | AC004381.6 | 0.491803279 | 3.134078212 |
| ENSG00000005243 | COPZ2      | 0.491803279 | 3.134078212 |
| ENSG00000005421 | PON1       | 0.491803279 | 3.134078212 |
| ENSG00000005513 | SOX8       | 0.491803279 | 3.134078212 |
| ENSG00000005700 | IBTK       | 0.491803279 | 3.134078212 |
| ENSG00000005844 | ITGAL      | 0.491803279 | 3.134078212 |
| ENSG00000005889 | ZFX        | 0.491803279 | 3.134078212 |
| ENSG00000006074 | CCL18      | 0.491803279 | 3.134078212 |
| ENSG00000006453 | BAIAP2L1   | 0.491803279 | 3.134078212 |
| ENSG00000006611 | USH1C      | 0.491803279 | 3.134078212 |
| ENSG00000006652 | IFRD1      | 0.491803279 | 3.134078212 |
| ENSG00000007001 | UPP2       | 0.491803279 | 3.134078212 |
| ENSG00000007047 | MARK4      | 0.491803279 | 3.134078212 |
| ENSG00000007384 | RHBDF1     | 0.491803279 | 3.134078212 |
| ENSG00000007923 | DNAJC11    | 0.491803279 | 3.134078212 |
| ENSG00000008277 | ADAM22     | 0.491803279 | 3.134078212 |
| ENSG00000008282 | SYPL1      | 0.491803279 | 3.134078212 |
| ENSG00000008394 | MGST1      | 0.491803279 | 3.134078212 |
| ENSG00000008516 | MMP25      | 0.491803279 | 3.134078212 |
| ENSG00000008735 | MAPK8IP2   | 0.491803279 | 3.134078212 |
| ENSG00000009780 | FAM76A     | 0.491803279 | 3.134078212 |
| ENSG00000009950 | MLXIPL     | 0.491803279 | 3.134078212 |
| ENSG00000010278 | CD9        | 0.491803279 | 3.134078212 |
| ENSG00000010295 | IFFO1      | 0.491803279 | 3.134078212 |
| ENSG00000010318 | PHF7       | 0.491803279 | 3.134078212 |

|                 |          |             |             |
|-----------------|----------|-------------|-------------|
| ENSG00000010671 | BTK      | 0.491803279 | 3.134078212 |
| ENSG00000011243 | AKAP8L   | 0.491803279 | 3.134078212 |
| ENSG00000011405 | PIK3C2A  | 0.491803279 | 3.134078212 |
| ENSG00000013583 | HEBP1    | 0.491803279 | 3.134078212 |
| ENSG00000018236 | CNTN1    | 0.491803279 | 3.134078212 |
| ENSG00000018280 | SLC11A1  | 0.491803279 | 3.134078212 |
| ENSG00000019505 | SYT13    | 0.491803279 | 3.134078212 |
| ENSG00000019549 | SNAI2    | 0.491803279 | 3.134078212 |
| ENSG00000020577 | SAMD4A   | 0.491803279 | 3.134078212 |
| ENSG00000021776 | AQR      | 0.491803279 | 3.134078212 |
| ENSG00000022277 | RTFDC1   | 0.491803279 | 3.134078212 |
| ENSG00000022976 | ZNF839   | 0.491803279 | 3.134078212 |
| ENSG00000023171 | GRAMD1B  | 0.491803279 | 3.134078212 |
| ENSG00000023734 | STRAP    | 0.491803279 | 3.134078212 |
| ENSG00000024048 | UBR2     | 0.491803279 | 3.134078212 |
| ENSG00000024862 | CCDC28A  | 0.491803279 | 3.134078212 |
| ENSG00000025039 | RRAGD    | 0.491803279 | 3.134078212 |
| ENSG00000025293 | PHF20    | 0.491803279 | 3.134078212 |
| ENSG00000025434 | NR1H3    | 0.491803279 | 3.134078212 |
| ENSG00000025770 | NCAPH2   | 0.491803279 | 3.134078212 |
| ENSG00000033178 | UBA6     | 0.491803279 | 3.134078212 |
| ENSG00000034239 | EFCAB1   | 0.491803279 | 3.134078212 |
| ENSG00000038945 | MSR1     | 0.491803279 | 3.134078212 |
| ENSG00000040199 | PHLPP2   | 0.491803279 | 3.134078212 |
| ENSG00000042317 | SPATA7   | 0.491803279 | 3.134078212 |
| ENSG00000043355 | ZIC2     | 0.491803279 | 3.134078212 |
| ENSG00000046653 | GPM6B    | 0.491803279 | 3.134078212 |
| ENSG00000047188 | YTHDC2   | 0.491803279 | 3.134078212 |
| ENSG00000047230 | CTPS2    | 0.491803279 | 3.134078212 |
| ENSG00000047457 | CP       | 0.491803279 | 3.134078212 |
| ENSG00000047648 | ARHGAP6  | 0.491803279 | 3.134078212 |
| ENSG00000048545 | GUCA1A   | 0.491803279 | 3.134078212 |
| ENSG00000048740 | CELF2    | 0.491803279 | 3.134078212 |
| ENSG00000050393 | MCUR1    | 0.491803279 | 3.134078212 |
| ENSG00000052802 | MSMO1    | 0.491803279 | 3.134078212 |
| ENSG00000053501 | USE1     | 0.491803279 | 3.134078212 |
| ENSG00000054118 | THRAP3   | 0.491803279 | 3.134078212 |
| ENSG00000054796 | SPO11    | 0.491803279 | 3.134078212 |
| ENSG00000055118 | KCNH2    | 0.491803279 | 3.134078212 |
| ENSG00000055147 | FAM114A2 | 0.491803279 | 3.134078212 |
| ENSG00000055163 | CYFIP2   | 0.491803279 | 3.134078212 |
| ENSG00000055732 | MCOLN3   | 0.491803279 | 3.134078212 |
| ENSG00000055917 | PUM2     | 0.491803279 | 3.134078212 |
| ENSG00000055950 | MRPL43   | 0.491803279 | 3.134078212 |
| ENSG00000056097 | ZFR      | 0.491803279 | 3.134078212 |
| ENSG00000056291 | NPFFR2   | 0.491803279 | 3.134078212 |
| ENSG00000056558 | TRAF1    | 0.491803279 | 3.134078212 |

|                 |         |             |             |
|-----------------|---------|-------------|-------------|
| ENSG00000059145 | UNKL    | 0.491803279 | 3.134078212 |
| ENSG00000059769 | DNAJC25 | 0.491803279 | 3.134078212 |
| ENSG00000060558 | GNA15   | 0.491803279 | 3.134078212 |
| ENSG00000061492 | WNT8A   | 0.491803279 | 3.134078212 |
| ENSG00000062096 | ARSF    | 0.491803279 | 3.134078212 |
| ENSG00000062282 | DGAT2   | 0.491803279 | 3.134078212 |
| ENSG00000062582 | MRPS24  | 0.491803279 | 3.134078212 |
| ENSG00000062650 | WAPAL   | 0.491803279 | 3.134078212 |
| ENSG00000063180 | CA11    | 0.491803279 | 3.134078212 |
| ENSG00000063515 | GSC2    | 0.491803279 | 3.134078212 |
| ENSG00000063660 | GPC1    | 0.491803279 | 3.134078212 |
| ENSG00000063761 | ADCK1   | 0.491803279 | 3.134078212 |
| ENSG00000064042 | LIMCH1  | 0.491803279 | 3.134078212 |
| ENSG00000064205 | WISP2   | 0.491803279 | 3.134078212 |
| ENSG00000064419 | TNPO3   | 0.491803279 | 3.134078212 |
| ENSG00000064547 | LPAR2   | 0.491803279 | 3.134078212 |
| ENSG00000064651 | SLC12A2 | 0.491803279 | 3.134078212 |
| ENSG00000064932 | SBNO2   | 0.491803279 | 3.134078212 |
| ENSG00000064989 | CALCRL  | 0.491803279 | 3.134078212 |
| ENSG00000064999 | ANKS1A  | 0.491803279 | 3.134078212 |
| ENSG00000065357 | DGKA    | 0.491803279 | 3.134078212 |
| ENSG00000065371 | ROPN1   | 0.491803279 | 3.134078212 |
| ENSG00000065883 | CDK13   | 0.491803279 | 3.134078212 |
| ENSG00000065911 | MTHFD2  | 0.491803279 | 3.134078212 |
| ENSG00000066032 | CTNNA2  | 0.491803279 | 3.134078212 |
| ENSG00000066379 | ZNRD1   | 0.491803279 | 3.134078212 |
| ENSG00000067167 | TRAM1   | 0.491803279 | 3.134078212 |
| ENSG00000067248 | DHX29   | 0.491803279 | 3.134078212 |
| ENSG00000067445 | TRO     | 0.491803279 | 3.134078212 |
| ENSG00000067829 | IDH3G   | 0.491803279 | 3.134078212 |
| ENSG00000067900 | ROCK1   | 0.491803279 | 3.134078212 |
| ENSG00000068366 | ACSL4   | 0.491803279 | 3.134078212 |
| ENSG00000068489 | PRR11   | 0.491803279 | 3.134078212 |
| ENSG00000069399 | BCL3    | 0.491803279 | 3.134078212 |
| ENSG00000069696 | DRD4    | 0.491803279 | 3.134078212 |
| ENSG00000070388 | FGF22   | 0.491803279 | 3.134078212 |
| ENSG00000070423 | RNF126  | 0.491803279 | 3.134078212 |
| ENSG00000070614 | NDST1   | 0.491803279 | 3.134078212 |
| ENSG00000070669 | ASNS    | 0.491803279 | 3.134078212 |
| ENSG00000070729 | CNGB1   | 0.491803279 | 3.134078212 |
| ENSG00000071054 | MAP4K4  | 0.491803279 | 3.134078212 |
| ENSG00000071282 | LMCD1   | 0.491803279 | 3.134078212 |
| ENSG00000072315 | TRPC5   | 0.491803279 | 3.134078212 |
| ENSG00000072609 | CHFR    | 0.491803279 | 3.134078212 |
| ENSG00000072657 | TRHDE   | 0.491803279 | 3.134078212 |
| ENSG00000072736 | NFATC3  | 0.491803279 | 3.134078212 |
| ENSG00000072778 | ACADVL  | 0.491803279 | 3.134078212 |

|                 |          |             |             |
|-----------------|----------|-------------|-------------|
| ENSG00000072858 | SIDT1    | 0.491803279 | 3.134078212 |
| ENSG00000073417 | PDE8A    | 0.491803279 | 3.134078212 |
| ENSG00000073598 | FNDC8    | 0.491803279 | 3.134078212 |
| ENSG00000073737 | DHRS9    | 0.491803279 | 3.134078212 |
| ENSG00000074660 | SCARF1   | 0.491803279 | 3.134078212 |
| ENSG00000074771 | NOX3     | 0.491803279 | 3.134078212 |
| ENSG00000075303 | SLC25A40 | 0.491803279 | 3.134078212 |
| ENSG00000075391 | RASAL2   | 0.491803279 | 3.134078212 |
| ENSG00000075399 | VPS9D1   | 0.491803279 | 3.134078212 |
| ENSG00000075618 | FSCN1    | 0.491803279 | 3.134078212 |
| ENSG00000075856 | SART3    | 0.491803279 | 3.134078212 |
| ENSG00000075914 | EXOSC7   | 0.491803279 | 3.134078212 |
| ENSG00000076770 | MBNL3    | 0.491803279 | 3.134078212 |
| ENSG00000077254 | USP33    | 0.491803279 | 3.134078212 |
| ENSG00000077274 | CAPN6    | 0.491803279 | 3.134078212 |
| ENSG00000077327 | SPAG6    | 0.491803279 | 3.134078212 |
| ENSG00000077348 | EXOSC5   | 0.491803279 | 3.134078212 |
| ENSG00000077514 | POLD3    | 0.491803279 | 3.134078212 |
| ENSG00000077684 | JADE1    | 0.491803279 | 3.134078212 |
| ENSG00000077782 | FGFR1    | 0.491803279 | 3.134078212 |
| ENSG00000078081 | LAMP3    | 0.491803279 | 3.134078212 |
| ENSG00000078124 | ACER3    | 0.491803279 | 3.134078212 |
| ENSG00000078399 | HOXA9    | 0.491803279 | 3.134078212 |
| ENSG00000078687 | TNRC6C   | 0.491803279 | 3.134078212 |
| ENSG00000078699 | CBFA2T2  | 0.491803279 | 3.134078212 |
| ENSG00000078808 | SDF4     | 0.491803279 | 3.134078212 |
| ENSG00000078900 | TP73     | 0.491803279 | 3.134078212 |
| ENSG00000079156 | OSBPL6   | 0.491803279 | 3.134078212 |
| ENSG00000079335 | CDC14A   | 0.491803279 | 3.134078212 |
| ENSG00000080189 | SLC35C2  | 0.491803279 | 3.134078212 |
| ENSG00000080293 | SCTR     | 0.491803279 | 3.134078212 |
| ENSG00000080503 | SMARCA2  | 0.491803279 | 3.134078212 |
| ENSG00000080608 | KIAA0020 | 0.491803279 | 3.134078212 |
| ENSG00000081059 | TCF7     | 0.491803279 | 3.134078212 |
| ENSG00000081138 | CDH7     | 0.491803279 | 3.134078212 |
| ENSG00000081307 | UBA5     | 0.491803279 | 3.134078212 |
| ENSG00000081853 | PCDHGA2  | 0.491803279 | 3.134078212 |
| ENSG00000082458 | DLG3     | 0.491803279 | 3.134078212 |
| ENSG00000082556 | OPRK1    | 0.491803279 | 3.134078212 |
| ENSG00000082701 | GSK3B    | 0.491803279 | 3.134078212 |
| ENSG00000083444 | PLOD1    | 0.491803279 | 3.134078212 |
| ENSG00000083535 | PIBF1    | 0.491803279 | 3.134078212 |
| ENSG00000083642 | PDS5B    | 0.491803279 | 3.134078212 |
| ENSG00000083812 | ZNF324   | 0.491803279 | 3.134078212 |
| ENSG00000083814 | ZNF671   | 0.491803279 | 3.134078212 |
| ENSG00000086758 | HUWE1    | 0.491803279 | 3.134078212 |
| ENSG00000087008 | ACOX3    | 0.491803279 | 3.134078212 |

|                 |           |             |             |
|-----------------|-----------|-------------|-------------|
| ENSG00000087128 | TMPRSS11E | 0.491803279 | 3.134078212 |
| ENSG00000087157 | PGS1      | 0.491803279 | 3.134078212 |
| ENSG00000087448 | KLHL42    | 0.491803279 | 3.134078212 |
| ENSG00000088812 | ATRN      | 0.491803279 | 3.134078212 |
| ENSG00000088899 | LZTS3     | 0.491803279 | 3.134078212 |
| ENSG00000088926 | F11       | 0.491803279 | 3.134078212 |
| ENSG00000088930 | XRN2      | 0.491803279 | 3.134078212 |
| ENSG00000089220 | PEBP1     | 0.491803279 | 3.134078212 |
| ENSG00000089685 | BIRC5     | 0.491803279 | 3.134078212 |
| ENSG00000089820 | ARHGAP4   | 0.491803279 | 3.134078212 |
| ENSG00000090104 | RGS1      | 0.491803279 | 3.134078212 |
| ENSG00000090273 | NUDC      | 0.491803279 | 3.134078212 |
| ENSG00000090372 | STRN4     | 0.491803279 | 3.134078212 |
| ENSG00000090857 | PDPR      | 0.491803279 | 3.134078212 |
| ENSG00000091127 | PUS7      | 0.491803279 | 3.134078212 |
| ENSG00000091157 | WDR7      | 0.491803279 | 3.134078212 |
| ENSG00000091262 | ABCC6     | 0.491803279 | 3.134078212 |
| ENSG00000091436 | MLTK      | 0.491803279 | 3.134078212 |
| ENSG00000091704 | CPA1      | 0.491803279 | 3.134078212 |
| ENSG00000091972 | CD200     | 0.491803279 | 3.134078212 |
| ENSG00000091986 | CCDC80    | 0.491803279 | 3.134078212 |
| ENSG00000092096 | SLC22A17  | 0.491803279 | 3.134078212 |
| ENSG00000092607 | TBX15     | 0.491803279 | 3.134078212 |
| ENSG00000092621 | PHGDH     | 0.491803279 | 3.134078212 |
| ENSG00000092820 | EZR       | 0.491803279 | 3.134078212 |
| ENSG00000092978 | GPATCH2   | 0.491803279 | 3.134078212 |
| ENSG00000093144 | ECHDC1    | 0.491803279 | 3.134078212 |
| ENSG00000095380 | NANS      | 0.491803279 | 3.134078212 |
| ENSG00000095485 | CWF19L1   | 0.491803279 | 3.134078212 |
| ENSG00000095739 | BAMBI     | 0.491803279 | 3.134078212 |
| ENSG00000095794 | CREM      | 0.491803279 | 3.134078212 |
| ENSG00000096401 | CDC5L     | 0.491803279 | 3.134078212 |
| ENSG00000096872 | IFT74     | 0.491803279 | 3.134078212 |
| ENSG00000097033 | SH3GLB1   | 0.491803279 | 3.134078212 |
| ENSG00000097046 | CDC7      | 0.491803279 | 3.134078212 |
| ENSG00000099219 | ERMP1     | 0.491803279 | 3.134078212 |
| ENSG00000099282 | TSPAN15   | 0.491803279 | 3.134078212 |
| ENSG00000099399 | MAGEB2    | 0.491803279 | 3.134078212 |
| ENSG00000099795 | NDUFB7    | 0.491803279 | 3.134078212 |
| ENSG00000099817 | POLR2E    | 0.491803279 | 3.134078212 |
| ENSG00000099937 | SERPIND1  | 0.491803279 | 3.134078212 |
| ENSG00000099940 | SNAP29    | 0.491803279 | 3.134078212 |
| ENSG00000100024 | UPB1      | 0.491803279 | 3.134078212 |
| ENSG00000100065 | CARD10    | 0.491803279 | 3.134078212 |
| ENSG00000100068 | LRP5L     | 0.491803279 | 3.134078212 |
| ENSG00000100105 | PATZ1     | 0.491803279 | 3.134078212 |
| ENSG00000100156 | SLC16A8   | 0.491803279 | 3.134078212 |

|                 |          |             |             |
|-----------------|----------|-------------|-------------|
| ENSG00000100228 | RAB36    | 0.491803279 | 3.134078212 |
| ENSG00000100271 | TTL1     | 0.491803279 | 3.134078212 |
| ENSG00000100296 | THOC5    | 0.491803279 | 3.134078212 |
| ENSG00000100341 | PNPLA5   | 0.491803279 | 3.134078212 |
| ENSG00000100353 | EIF3D    | 0.491803279 | 3.134078212 |
| ENSG00000100359 | SGSM3    | 0.491803279 | 3.134078212 |
| ENSG00000100380 | ST13     | 0.491803279 | 3.134078212 |
| ENSG00000100395 | L3MBTL2  | 0.491803279 | 3.134078212 |
| ENSG00000100403 | ZC3H7B   | 0.491803279 | 3.134078212 |
| ENSG00000100417 | PMM1     | 0.491803279 | 3.134078212 |
| ENSG00000100422 | CERK     | 0.491803279 | 3.134078212 |
| ENSG00000100429 | HDAC10   | 0.491803279 | 3.134078212 |
| ENSG00000100441 | KHNYN    | 0.491803279 | 3.134078212 |
| ENSG00000100461 | RBM23    | 0.491803279 | 3.134078212 |
| ENSG00000100462 | PRMT5    | 0.491803279 | 3.134078212 |
| ENSG00000100473 | COCH     | 0.491803279 | 3.134078212 |
| ENSG00000100490 | CDKL1    | 0.491803279 | 3.134078212 |
| ENSG00000100526 | CDKN3    | 0.491803279 | 3.134078212 |
| ENSG00000100592 | DAAM1    | 0.491803279 | 3.134078212 |
| ENSG00000100652 | SLC10A1  | 0.491803279 | 3.134078212 |
| ENSG00000100726 | TELO2    | 0.491803279 | 3.134078212 |
| ENSG00000100802 | C14orf93 | 0.491803279 | 3.134078212 |
| ENSG00000100884 | CPNE6    | 0.491803279 | 3.134078212 |
| ENSG00000100938 | GMPR2    | 0.491803279 | 3.134078212 |
| ENSG00000100982 | PCIF1    | 0.491803279 | 3.134078212 |
| ENSG00000100987 | VSX1     | 0.491803279 | 3.134078212 |
| ENSG00000100997 | ABHD12   | 0.491803279 | 3.134078212 |
| ENSG00000101082 | SLA2     | 0.491803279 | 3.134078212 |
| ENSG00000101144 | BMP7     | 0.491803279 | 3.134078212 |
| ENSG00000101292 | PROKR2   | 0.491803279 | 3.134078212 |
| ENSG00000101310 | SEC23B   | 0.491803279 | 3.134078212 |
| ENSG00000101336 | HCK      | 0.491803279 | 3.134078212 |
| ENSG00000101361 | NOP56    | 0.491803279 | 3.134078212 |
| ENSG00000101452 | DHX35    | 0.491803279 | 3.134078212 |
| ENSG00000101493 | ZNF516   | 0.491803279 | 3.134078212 |
| ENSG00000101542 | CDH20    | 0.491803279 | 3.134078212 |
| ENSG00000101577 | LPIN2    | 0.491803279 | 3.134078212 |
| ENSG00000101638 | ST8SIA5  | 0.491803279 | 3.134078212 |
| ENSG00000101654 | RNMT     | 0.491803279 | 3.134078212 |
| ENSG00000101695 | RNF125   | 0.491803279 | 3.134078212 |
| ENSG00000101890 | GUCY2F   | 0.491803279 | 3.134078212 |
| ENSG00000101901 | ALG13    | 0.491803279 | 3.134078212 |
| ENSG00000101974 | ATP11C   | 0.491803279 | 3.134078212 |
| ENSG00000101981 | F9       | 0.491803279 | 3.134078212 |
| ENSG00000102054 | RBBP7    | 0.491803279 | 3.134078212 |
| ENSG00000102098 | SCML2    | 0.491803279 | 3.134078212 |
| ENSG00000102128 | RAB40AL  | 0.491803279 | 3.134078212 |

|                 |          |             |             |
|-----------------|----------|-------------|-------------|
| ENSG00000102221 | JADE3    | 0.491803279 | 3.134078212 |
| ENSG00000102225 | CDK16    | 0.491803279 | 3.134078212 |
| ENSG00000102265 | TIMP1    | 0.491803279 | 3.134078212 |
| ENSG00000102271 | KLHL4    | 0.491803279 | 3.134078212 |
| ENSG00000102302 | FGD1     | 0.491803279 | 3.134078212 |
| ENSG00000102383 | ZDHHC15  | 0.491803279 | 3.134078212 |
| ENSG00000102384 | CENPI    | 0.491803279 | 3.134078212 |
| ENSG00000102471 | NDFIP2   | 0.491803279 | 3.134078212 |
| ENSG00000102524 | TNFSF13B | 0.491803279 | 3.134078212 |
| ENSG00000102554 | KLF5     | 0.491803279 | 3.134078212 |
| ENSG00000102572 | STK24    | 0.491803279 | 3.134078212 |
| ENSG00000102710 | SUPT20H  | 0.491803279 | 3.134078212 |
| ENSG00000102738 | MRPS31   | 0.491803279 | 3.134078212 |
| ENSG00000102786 | INTS6    | 0.491803279 | 3.134078212 |
| ENSG00000102908 | NFAT5    | 0.491803279 | 3.134078212 |
| ENSG00000102977 | ACD      | 0.491803279 | 3.134078212 |
| ENSG00000103024 | NME3     | 0.491803279 | 3.134078212 |
| ENSG00000103064 | SLC7A6   | 0.491803279 | 3.134078212 |
| ENSG00000103091 | WDR59    | 0.491803279 | 3.134078212 |
| ENSG00000103199 | ZNF500   | 0.491803279 | 3.134078212 |
| ENSG00000103266 | STUB1    | 0.491803279 | 3.134078212 |
| ENSG00000103342 | GSPT1    | 0.491803279 | 3.134078212 |
| ENSG00000103365 | GGA2     | 0.491803279 | 3.134078212 |
| ENSG00000103404 | USP31    | 0.491803279 | 3.134078212 |
| ENSG00000103415 | HMOX2    | 0.491803279 | 3.134078212 |
| ENSG00000103429 | BFAR     | 0.491803279 | 3.134078212 |
| ENSG00000103489 | XYLT1    | 0.491803279 | 3.134078212 |
| ENSG00000103599 | IQCH     | 0.491803279 | 3.134078212 |
| ENSG00000103671 | TRIP4    | 0.491803279 | 3.134078212 |
| ENSG00000103966 | EHD4     | 0.491803279 | 3.134078212 |
| ENSG00000104129 | DNAJC17  | 0.491803279 | 3.134078212 |
| ENSG00000104177 | MYEF2    | 0.491803279 | 3.134078212 |
| ENSG00000104312 | RIPK2    | 0.491803279 | 3.134078212 |
| ENSG00000104313 | EYA1     | 0.491803279 | 3.134078212 |
| ENSG00000104369 | JPH1     | 0.491803279 | 3.134078212 |
| ENSG00000104755 | ADAM2    | 0.491803279 | 3.134078212 |
| ENSG00000104805 | NUCB1    | 0.491803279 | 3.134078212 |
| ENSG00000104888 | SLC17A7  | 0.491803279 | 3.134078212 |
| ENSG00000104899 | AMH      | 0.491803279 | 3.134078212 |
| ENSG00000104907 | TRMT1    | 0.491803279 | 3.134078212 |
| ENSG00000104918 | RETN     | 0.491803279 | 3.134078212 |
| ENSG00000104953 | TLE6     | 0.491803279 | 3.134078212 |
| ENSG00000104980 | TIMM44   | 0.491803279 | 3.134078212 |
| ENSG00000105171 | POP4     | 0.491803279 | 3.134078212 |
| ENSG00000105185 | PDCD5    | 0.491803279 | 3.134078212 |
| ENSG00000105261 | OVOL3    | 0.491803279 | 3.134078212 |
| ENSG00000105371 | ICAM4    | 0.491803279 | 3.134078212 |

|                 |          |             |             |
|-----------------|----------|-------------|-------------|
| ENSG00000105509 | HAS1     | 0.491803279 | 3.134078212 |
| ENSG00000105613 | MAST1    | 0.491803279 | 3.134078212 |
| ENSG00000105641 | SLC5A5   | 0.491803279 | 3.134078212 |
| ENSG00000105647 | PIK3R2   | 0.491803279 | 3.134078212 |
| ENSG00000105656 | ELL      | 0.491803279 | 3.134078212 |
| ENSG00000105664 | COMP     | 0.491803279 | 3.134078212 |
| ENSG00000105679 | GAPDHS   | 0.491803279 | 3.134078212 |
| ENSG00000105696 | TMEM59L  | 0.491803279 | 3.134078212 |
| ENSG00000105717 | PBX4     | 0.491803279 | 3.134078212 |
| ENSG00000105737 | GRIK5    | 0.491803279 | 3.134078212 |
| ENSG00000105767 | CADM4    | 0.491803279 | 3.134078212 |
| ENSG00000105856 | HBP1     | 0.491803279 | 3.134078212 |
| ENSG00000105889 | STEAP1B  | 0.491803279 | 3.134078212 |
| ENSG00000105993 | DNAJB6   | 0.491803279 | 3.134078212 |
| ENSG00000106004 | HOXA5    | 0.491803279 | 3.134078212 |
| ENSG00000106025 | TSPAN12  | 0.491803279 | 3.134078212 |
| ENSG00000106086 | PLEKHA8  | 0.491803279 | 3.134078212 |
| ENSG00000106244 | PDAP1    | 0.491803279 | 3.134078212 |
| ENSG00000106268 | NUDT1    | 0.491803279 | 3.134078212 |
| ENSG00000106299 | WASL     | 0.491803279 | 3.134078212 |
| ENSG00000106443 | PHF14    | 0.491803279 | 3.134078212 |
| ENSG00000106541 | AGR2     | 0.491803279 | 3.134078212 |
| ENSG00000106591 | MRPL32   | 0.491803279 | 3.134078212 |
| ENSG00000106603 | COA1     | 0.491803279 | 3.134078212 |
| ENSG00000106689 | LHX2     | 0.491803279 | 3.134078212 |
| ENSG00000107018 | RLN1     | 0.491803279 | 3.134078212 |
| ENSG00000107282 | APBA1    | 0.491803279 | 3.134078212 |
| ENSG00000107331 | ABCA2    | 0.491803279 | 3.134078212 |
| ENSG00000107404 | DVL1     | 0.491803279 | 3.134078212 |
| ENSG00000107518 | ATRNL1   | 0.491803279 | 3.134078212 |
| ENSG00000107521 | HPS1     | 0.491803279 | 3.134078212 |
| ENSG00000107551 | RASSF4   | 0.491803279 | 3.134078212 |
| ENSG00000107593 | PKD2L1   | 0.491803279 | 3.134078212 |
| ENSG00000107779 | BMPR1A   | 0.491803279 | 3.134078212 |
| ENSG00000107789 | MINPP1   | 0.491803279 | 3.134078212 |
| ENSG00000107854 | TNKS2    | 0.491803279 | 3.134078212 |
| ENSG00000107874 | CUEDC2   | 0.491803279 | 3.134078212 |
| ENSG00000108272 | DHRS11   | 0.491803279 | 3.134078212 |
| ENSG00000108342 | CSF3     | 0.491803279 | 3.134078212 |
| ENSG00000108352 | RAPGEFL1 | 0.491803279 | 3.134078212 |
| ENSG00000108375 | RNF43    | 0.491803279 | 3.134078212 |
| ENSG00000108395 | TRIM37   | 0.491803279 | 3.134078212 |
| ENSG00000108417 | KRT37    | 0.491803279 | 3.134078212 |
| ENSG00000108556 | CHRNE    | 0.491803279 | 3.134078212 |
| ENSG00000108691 | CCL2     | 0.491803279 | 3.134078212 |
| ENSG00000108840 | HDAC5    | 0.491803279 | 3.134078212 |
| ENSG00000108950 | FAM20A   | 0.491803279 | 3.134078212 |

|                 |          |             |             |
|-----------------|----------|-------------|-------------|
| ENSG00000109016 | DHRS7B   | 0.491803279 | 3.134078212 |
| ENSG00000109047 | RCVRN    | 0.491803279 | 3.134078212 |
| ENSG00000109084 | TMEM97   | 0.491803279 | 3.134078212 |
| ENSG00000109101 | FOXN1    | 0.491803279 | 3.134078212 |
| ENSG00000109163 | GNRHR    | 0.491803279 | 3.134078212 |
| ENSG00000109184 | DCUN1D4  | 0.491803279 | 3.134078212 |
| ENSG00000109452 | INPP4B   | 0.491803279 | 3.134078212 |
| ENSG00000109472 | CPE      | 0.491803279 | 3.134078212 |
| ENSG00000109572 | CLCN3    | 0.491803279 | 3.134078212 |
| ENSG00000109586 | GALNT7   | 0.491803279 | 3.134078212 |
| ENSG00000109680 | TBC1D19  | 0.491803279 | 3.134078212 |
| ENSG00000109685 | WHSC1    | 0.491803279 | 3.134078212 |
| ENSG00000109756 | RAPGEF2  | 0.491803279 | 3.134078212 |
| ENSG00000109790 | KLHL5    | 0.491803279 | 3.134078212 |
| ENSG00000109819 | PPARGC1A | 0.491803279 | 3.134078212 |
| ENSG00000110031 | LPXN     | 0.491803279 | 3.134078212 |
| ENSG00000110047 | EHD1     | 0.491803279 | 3.134078212 |
| ENSG00000110075 | PPP6R3   | 0.491803279 | 3.134078212 |
| ENSG00000110079 | MS4A4A   | 0.491803279 | 3.134078212 |
| ENSG00000110104 | CCDC86   | 0.491803279 | 3.134078212 |
| ENSG00000110203 | FOLR3    | 0.491803279 | 3.134078212 |
| ENSG00000110243 | APOA5    | 0.491803279 | 3.134078212 |
| ENSG00000110375 | UPK2     | 0.491803279 | 3.134078212 |
| ENSG00000110665 | C11orf21 | 0.491803279 | 3.134078212 |
| ENSG00000110675 | ELMOD1   | 0.491803279 | 3.134078212 |
| ENSG00000110876 | SELPLG   | 0.491803279 | 3.134078212 |
| ENSG00000110887 | DAO      | 0.491803279 | 3.134078212 |
| ENSG00000111011 | RSRC2    | 0.491803279 | 3.134078212 |
| ENSG00000111049 | MYF5     | 0.491803279 | 3.134078212 |
| ENSG00000111087 | GLI1     | 0.491803279 | 3.134078212 |
| ENSG00000111142 | METAP2   | 0.491803279 | 3.134078212 |
| ENSG00000111275 | ALDH2    | 0.491803279 | 3.134078212 |
| ENSG00000111361 | EIF2B1   | 0.491803279 | 3.134078212 |
| ENSG00000111432 | FZD10    | 0.491803279 | 3.134078212 |
| ENSG00000111602 | TIMELESS | 0.491803279 | 3.134078212 |
| ENSG00000111615 | KRR1     | 0.491803279 | 3.134078212 |
| ENSG00000111652 | COPS7A   | 0.491803279 | 3.134078212 |
| ENSG00000111837 | MAK      | 0.491803279 | 3.134078212 |
| ENSG00000111860 | CEP85L   | 0.491803279 | 3.134078212 |
| ENSG00000111880 | RNGTT    | 0.491803279 | 3.134078212 |
| ENSG00000111897 | SERINC1  | 0.491803279 | 3.134078212 |
| ENSG00000111912 | NCOA7    | 0.491803279 | 3.134078212 |
| ENSG00000112039 | FANCE    | 0.491803279 | 3.134078212 |
| ENSG00000112078 | KCTD20   | 0.491803279 | 3.134078212 |
| ENSG00000112308 | C6orf62  | 0.491803279 | 3.134078212 |
| ENSG00000112378 | PERP     | 0.491803279 | 3.134078212 |
| ENSG00000112462 | OR12D3   | 0.491803279 | 3.134078212 |

|                 |              |             |             |
|-----------------|--------------|-------------|-------------|
| ENSG00000112511 | PHF1         | 0.491803279 | 3.134078212 |
| ENSG00000112619 | PRPH2        | 0.491803279 | 3.134078212 |
| ENSG00000112701 | SENP6        | 0.491803279 | 3.134078212 |
| ENSG00000112742 | TTK          | 0.491803279 | 3.134078212 |
| ENSG00000112763 | BTN2A1       | 0.491803279 | 3.134078212 |
| ENSG00000112837 | TBX18        | 0.491803279 | 3.134078212 |
| ENSG00000112852 | PCDHB2       | 0.491803279 | 3.134078212 |
| ENSG00000112855 | HARS2        | 0.491803279 | 3.134078212 |
| ENSG00000112981 | NME5         | 0.491803279 | 3.134078212 |
| ENSG00000113088 | GZMK         | 0.491803279 | 3.134078212 |
| ENSG00000113273 | ARSB         | 0.491803279 | 3.134078212 |
| ENSG00000113282 | CLINT1       | 0.491803279 | 3.134078212 |
| ENSG00000113318 | MSH3         | 0.491803279 | 3.134078212 |
| ENSG00000113361 | CDH6         | 0.491803279 | 3.134078212 |
| ENSG00000113389 | NPR3         | 0.491803279 | 3.134078212 |
| ENSG00000113430 | IRX4         | 0.491803279 | 3.134078212 |
| ENSG00000113838 | TBCCD1       | 0.491803279 | 3.134078212 |
| ENSG00000113971 | NPHP3        | 0.491803279 | 3.134078212 |
| ENSG00000114054 | PCCB         | 0.491803279 | 3.134078212 |
| ENSG00000114098 | ARMC8        | 0.491803279 | 3.134078212 |
| ENSG00000114107 | CEP70        | 0.491803279 | 3.134078212 |
| ENSG00000114354 | TFG          | 0.491803279 | 3.134078212 |
| ENSG00000114416 | FXR1         | 0.491803279 | 3.134078212 |
| ENSG00000114491 | UMPS         | 0.491803279 | 3.134078212 |
| ENSG00000114735 | HEMK1        | 0.491803279 | 3.134078212 |
| ENSG00000114786 | ABHD14A-ACY1 | 0.491803279 | 3.134078212 |
| ENSG00000114861 | FOXP1        | 0.491803279 | 3.134078212 |
| ENSG00000114993 | RTKN         | 0.491803279 | 3.134078212 |
| ENSG00000115008 | IL1A         | 0.491803279 | 3.134078212 |
| ENSG00000115129 | TP53I3       | 0.491803279 | 3.134078212 |
| ENSG00000115355 | CCDC88A      | 0.491803279 | 3.134078212 |
| ENSG00000115419 | GLS          | 0.491803279 | 3.134078212 |
| ENSG00000115425 | PECR         | 0.491803279 | 3.134078212 |
| ENSG00000115457 | IGFBP2       | 0.491803279 | 3.134078212 |
| ENSG00000115525 | ST3GAL5      | 0.491803279 | 3.134078212 |
| ENSG00000115539 | PDCL3        | 0.491803279 | 3.134078212 |
| ENSG00000115594 | IL1R1        | 0.491803279 | 3.134078212 |
| ENSG00000115761 | NOL10        | 0.491803279 | 3.134078212 |
| ENSG00000115827 | DCAF17       | 0.491803279 | 3.134078212 |
| ENSG00000115935 | WIPF1        | 0.491803279 | 3.134078212 |
| ENSG00000115947 | ORC4         | 0.491803279 | 3.134078212 |
| ENSG00000115966 | ATF2         | 0.491803279 | 3.134078212 |
| ENSG00000115998 | C2orf42      | 0.491803279 | 3.134078212 |
| ENSG00000116005 | PCYOX1       | 0.491803279 | 3.134078212 |
| ENSG00000116031 | CD207        | 0.491803279 | 3.134078212 |
| ENSG00000116035 | VAX2         | 0.491803279 | 3.134078212 |
| ENSG00000116044 | NFE2L2       | 0.491803279 | 3.134078212 |

|                 |         |             |             |
|-----------------|---------|-------------|-------------|
| ENSG00000116095 | PLEKHA3 | 0.491803279 | 3.134078212 |
| ENSG00000116147 | TNR     | 0.491803279 | 3.134078212 |
| ENSG00000116151 | MORN1   | 0.491803279 | 3.134078212 |
| ENSG00000116350 | SRSF4   | 0.491803279 | 3.134078212 |
| ENSG00000116668 | SWT1    | 0.491803279 | 3.134078212 |
| ENSG00000116690 | PRG4    | 0.491803279 | 3.134078212 |
| ENSG00000116748 | AMPD1   | 0.491803279 | 3.134078212 |
| ENSG00000116761 | CTH     | 0.491803279 | 3.134078212 |
| ENSG00000116819 | TFAP2E  | 0.491803279 | 3.134078212 |
| ENSG00000116852 | KIF21B  | 0.491803279 | 3.134078212 |
| ENSG00000116871 | MAP7D1  | 0.491803279 | 3.134078212 |
| ENSG00000116954 | RRAGC   | 0.491803279 | 3.134078212 |
| ENSG00000116996 | ZP4     | 0.491803279 | 3.134078212 |
| ENSG00000117091 | CD48    | 0.491803279 | 3.134078212 |
| ENSG00000117154 | IGSF21  | 0.491803279 | 3.134078212 |
| ENSG00000117289 | TXNIP   | 0.491803279 | 3.134078212 |
| ENSG00000117480 | FAAH    | 0.491803279 | 3.134078212 |
| ENSG00000117533 | VAMP4   | 0.491803279 | 3.134078212 |
| ENSG00000117697 | NSL1    | 0.491803279 | 3.134078212 |
| ENSG00000117707 | PROX1   | 0.491803279 | 3.134078212 |
| ENSG00000117899 | MESDC2  | 0.491803279 | 3.134078212 |
| ENSG00000118096 | IFT46   | 0.491803279 | 3.134078212 |
| ENSG00000118162 | KPTN    | 0.491803279 | 3.134078212 |
| ENSG00000118194 | TNNT2   | 0.491803279 | 3.134078212 |
| ENSG00000118231 | CRYGD   | 0.491803279 | 3.134078212 |
| ENSG00000118263 | KLF7    | 0.491803279 | 3.134078212 |
| ENSG00000118276 | B4GALT6 | 0.491803279 | 3.134078212 |
| ENSG00000118418 | HMGN3   | 0.491803279 | 3.134078212 |
| ENSG00000118432 | CNR1    | 0.491803279 | 3.134078212 |
| ENSG00000118596 | SLC16A7 | 0.491803279 | 3.134078212 |
| ENSG00000118620 | ZNF430  | 0.491803279 | 3.134078212 |
| ENSG00000118655 | DCLRE1B | 0.491803279 | 3.134078212 |
| ENSG00000118985 | ELL2    | 0.491803279 | 3.134078212 |
| ENSG00000119013 | NDUFB3  | 0.491803279 | 3.134078212 |
| ENSG00000119242 | CCDC92  | 0.491803279 | 3.134078212 |
| ENSG00000119314 | PTBP3   | 0.491803279 | 3.134078212 |
| ENSG00000119326 | CTNNA1  | 0.491803279 | 3.134078212 |
| ENSG00000119328 | FAM206A | 0.491803279 | 3.134078212 |
| ENSG00000119335 | SET     | 0.491803279 | 3.134078212 |
| ENSG00000119421 | NDUFA8  | 0.491803279 | 3.134078212 |
| ENSG00000119707 | RBM25   | 0.491803279 | 3.134078212 |
| ENSG00000119718 | EIF2B2  | 0.491803279 | 3.134078212 |
| ENSG00000119723 | COQ6    | 0.491803279 | 3.134078212 |
| ENSG00000119801 | YPEL5   | 0.491803279 | 3.134078212 |
| ENSG00000119900 | OGFRL1  | 0.491803279 | 3.134078212 |
| ENSG00000119906 | FAM178A | 0.491803279 | 3.134078212 |
| ENSG00000119912 | IDE     | 0.491803279 | 3.134078212 |

|                 |          |             |             |
|-----------------|----------|-------------|-------------|
| ENSG00000119946 | CNNM1    | 0.491803279 | 3.134078212 |
| ENSG00000119950 | MXI1     | 0.491803279 | 3.134078212 |
| ENSG00000119965 | C10orf88 | 0.491803279 | 3.134078212 |
| ENSG00000120071 | KANSL1   | 0.491803279 | 3.134078212 |
| ENSG00000120129 | DUSP1    | 0.491803279 | 3.134078212 |
| ENSG00000120253 | NUP43    | 0.491803279 | 3.134078212 |
| ENSG00000120256 | LRP11    | 0.491803279 | 3.134078212 |
| ENSG00000120662 | MTRF1    | 0.491803279 | 3.134078212 |
| ENSG00000120688 | WBP4     | 0.491803279 | 3.134078212 |
| ENSG00000120694 | HSPH1    | 0.491803279 | 3.134078212 |
| ENSG00000120896 | SORBS3   | 0.491803279 | 3.134078212 |
| ENSG00000120907 | ADRA1A   | 0.491803279 | 3.134078212 |
| ENSG00000120915 | EPHX2    | 0.491803279 | 3.134078212 |
| ENSG00000121057 | AKAP1    | 0.491803279 | 3.134078212 |
| ENSG00000121318 | TAS2R10  | 0.491803279 | 3.134078212 |
| ENSG00000121381 | TAS2R9   | 0.491803279 | 3.134078212 |
| ENSG00000121417 | ZNF211   | 0.491803279 | 3.134078212 |
| ENSG00000121644 | DESI2    | 0.491803279 | 3.134078212 |
| ENSG00000121690 | DEPDC7   | 0.491803279 | 3.134078212 |
| ENSG00000121879 | PIK3CA   | 0.491803279 | 3.134078212 |
| ENSG00000121931 | LRIF1    | 0.491803279 | 3.134078212 |
| ENSG00000121988 | ZRANB3   | 0.491803279 | 3.134078212 |
| ENSG00000121989 | ACVR2A   | 0.491803279 | 3.134078212 |
| ENSG00000122025 | FLT3     | 0.491803279 | 3.134078212 |
| ENSG00000122034 | GTF3A    | 0.491803279 | 3.134078212 |
| ENSG00000122085 | MTERFD2  | 0.491803279 | 3.134078212 |
| ENSG00000122367 | LDB3     | 0.491803279 | 3.134078212 |
| ENSG00000122375 | OPN4     | 0.491803279 | 3.134078212 |
| ENSG00000122378 | FAM213A  | 0.491803279 | 3.134078212 |
| ENSG00000122386 | ZNF205   | 0.491803279 | 3.134078212 |
| ENSG00000122543 | OCM      | 0.491803279 | 3.134078212 |
| ENSG00000122550 | KLHL7    | 0.491803279 | 3.134078212 |
| ENSG00000122679 | RAMP3    | 0.491803279 | 3.134078212 |
| ENSG00000122705 | CLTA     | 0.491803279 | 3.134078212 |
| ENSG00000122735 | DNAI1    | 0.491803279 | 3.134078212 |
| ENSG00000122958 | VPS26A   | 0.491803279 | 3.134078212 |
| ENSG00000123130 | ACOT9    | 0.491803279 | 3.134078212 |
| ENSG00000123154 | WDR83    | 0.491803279 | 3.134078212 |
| ENSG00000123171 | CCDC70   | 0.491803279 | 3.134078212 |
| ENSG00000123179 | EBPL     | 0.491803279 | 3.134078212 |
| ENSG00000123415 | SMUG1    | 0.491803279 | 3.134078212 |
| ENSG00000123472 | ATPAF1   | 0.491803279 | 3.134078212 |
| ENSG00000123500 | COL10A1  | 0.491803279 | 3.134078212 |
| ENSG00000123610 | TNFAIP6  | 0.491803279 | 3.134078212 |
| ENSG00000123612 | ACVR1C   | 0.491803279 | 3.134078212 |
| ENSG00000123739 | PLA2G12A | 0.491803279 | 3.134078212 |
| ENSG00000123836 | PFKFB2   | 0.491803279 | 3.134078212 |

|                 |                |             |             |
|-----------------|----------------|-------------|-------------|
| ENSG00000124074 | ENKD1          | 0.491803279 | 3.134078212 |
| ENSG00000124089 | MC3R           | 0.491803279 | 3.134078212 |
| ENSG00000124151 | NCOA3          | 0.491803279 | 3.134078212 |
| ENSG00000124164 | VAPB           | 0.491803279 | 3.134078212 |
| ENSG00000124181 | PLCG1          | 0.491803279 | 3.134078212 |
| ENSG00000124208 | TMEM189-UBE2V1 | 0.491803279 | 3.134078212 |
| ENSG00000124228 | DDX27          | 0.491803279 | 3.134078212 |
| ENSG00000124233 | SEMG1          | 0.491803279 | 3.134078212 |
| ENSG00000124249 | KCNK15         | 0.491803279 | 3.134078212 |
| ENSG00000124343 | XG             | 0.491803279 | 3.134078212 |
| ENSG00000124391 | IL17C          | 0.491803279 | 3.134078212 |
| ENSG00000124440 | HIF3A          | 0.491803279 | 3.134078212 |
| ENSG00000124535 | WRNIP1         | 0.491803279 | 3.134078212 |
| ENSG00000124571 | XPO5           | 0.491803279 | 3.134078212 |
| ENSG00000124593 | PRICKLE4       | 0.491803279 | 3.134078212 |
| ENSG00000124610 | HIST1H1A       | 0.491803279 | 3.134078212 |
| ENSG00000124641 | MED20          | 0.491803279 | 3.134078212 |
| ENSG00000124702 | KLHDC3         | 0.491803279 | 3.134078212 |
| ENSG00000125352 | RNF113A        | 0.491803279 | 3.134078212 |
| ENSG00000125375 | ATP5S          | 0.491803279 | 3.134078212 |
| ENSG00000125462 | C1orf61        | 0.491803279 | 3.134078212 |
| ENSG00000125520 | SLC2A4RG       | 0.491803279 | 3.134078212 |
| ENSG00000125531 | C20orf195      | 0.491803279 | 3.134078212 |
| ENSG00000125650 | PSPN           | 0.491803279 | 3.134078212 |
| ENSG00000125733 | TRIP10         | 0.491803279 | 3.134078212 |
| ENSG00000125775 | SDCBP2         | 0.491803279 | 3.134078212 |
| ENSG00000125779 | PANK2          | 0.491803279 | 3.134078212 |
| ENSG00000125813 | PAX1           | 0.491803279 | 3.134078212 |
| ENSG00000125815 | CST8           | 0.491803279 | 3.134078212 |
| ENSG00000125816 | NKX2-4         | 0.491803279 | 3.134078212 |
| ENSG00000125817 | CENPB          | 0.491803279 | 3.134078212 |
| ENSG00000126016 | AMOT           | 0.491803279 | 3.134078212 |
| ENSG00000126215 | XRCC3          | 0.491803279 | 3.134078212 |
| ENSG00000126216 | TUBGCP3        | 0.491803279 | 3.134078212 |
| ENSG00000126243 | LRFN3          | 0.491803279 | 3.134078212 |
| ENSG00000126266 | FFAR1          | 0.491803279 | 3.134078212 |
| ENSG00000126456 | IRF3           | 0.491803279 | 3.134078212 |
| ENSG00000126550 | HTN1           | 0.491803279 | 3.134078212 |
| ENSG00000126583 | PRKCG          | 0.491803279 | 3.134078212 |
| ENSG00000126603 | GLIS2          | 0.491803279 | 3.134078212 |
| ENSG00000126733 | DACH2          | 0.491803279 | 3.134078212 |
| ENSG00000126746 | ZNF384         | 0.491803279 | 3.134078212 |
| ENSG00000126785 | RHOJ           | 0.491803279 | 3.134078212 |
| ENSG00000126858 | RHOT1          | 0.491803279 | 3.134078212 |
| ENSG00000127152 | BCL11B         | 0.491803279 | 3.134078212 |
| ENSG00000127377 | CRYGN          | 0.491803279 | 3.134078212 |
| ENSG00000127445 | PIN1           | 0.491803279 | 3.134078212 |

|                 |          |             |             |
|-----------------|----------|-------------|-------------|
| ENSG00000127463 | EMC1     | 0.491803279 | 3.134078212 |
| ENSG00000127515 | OR7A10   | 0.491803279 | 3.134078212 |
| ENSG00000127527 | EPS15L1  | 0.491803279 | 3.134078212 |
| ENSG00000127578 | WFIKKN1  | 0.491803279 | 3.134078212 |
| ENSG00000127663 | KDM4B    | 0.491803279 | 3.134078212 |
| ENSG00000127884 | ECHS1    | 0.491803279 | 3.134078212 |
| ENSG00000127946 | HIP1     | 0.491803279 | 3.134078212 |
| ENSG00000128050 | PAICS    | 0.491803279 | 3.134078212 |
| ENSG00000128165 | ADM2     | 0.491803279 | 3.134078212 |
| ENSG00000128218 | VPREB3   | 0.491803279 | 3.134078212 |
| ENSG00000128228 | SDF2L1   | 0.491803279 | 3.134078212 |
| ENSG00000128254 | C22orf24 | 0.491803279 | 3.134078212 |
| ENSG00000128294 | TPST2    | 0.491803279 | 3.134078212 |
| ENSG00000128309 | MPST     | 0.491803279 | 3.134078212 |
| ENSG00000128310 | GALR3    | 0.491803279 | 3.134078212 |
| ENSG00000128342 | LIF      | 0.491803279 | 3.134078212 |
| ENSG00000128617 | OPN1SW   | 0.491803279 | 3.134078212 |
| ENSG00000128713 | HOXD11   | 0.491803279 | 3.134078212 |
| ENSG00000128805 | ARHGAP22 | 0.491803279 | 3.134078212 |
| ENSG00000129009 | ISLR     | 0.491803279 | 3.134078212 |
| ENSG00000129214 | SHBG     | 0.491803279 | 3.134078212 |
| ENSG00000129235 | TXNDC17  | 0.491803279 | 3.134078212 |
| ENSG00000129244 | ATP1B2   | 0.491803279 | 3.134078212 |
| ENSG00000129484 | PARP2    | 0.491803279 | 3.134078212 |
| ENSG00000129538 | RNASE1   | 0.491803279 | 3.134078212 |
| ENSG00000129757 | CDKN1C   | 0.491803279 | 3.134078212 |
| ENSG00000129910 | CDH15    | 0.491803279 | 3.134078212 |
| ENSG00000129951 | LPPR3    | 0.491803279 | 3.134078212 |
| ENSG00000129991 | TNNI3    | 0.491803279 | 3.134078212 |
| ENSG00000129993 | CBFA2T3  | 0.491803279 | 3.134078212 |
| ENSG00000130005 | GAMT     | 0.491803279 | 3.134078212 |
| ENSG00000130055 | GDPD2    | 0.491803279 | 3.134078212 |
| ENSG00000130150 | MOSPD2   | 0.491803279 | 3.134078212 |
| ENSG00000130176 | CNN1     | 0.491803279 | 3.134078212 |
| ENSG00000130182 | ZSCAN10  | 0.491803279 | 3.134078212 |
| ENSG00000130193 | THEM6    | 0.491803279 | 3.134078212 |
| ENSG00000130294 | KIF1A    | 0.491803279 | 3.134078212 |
| ENSG00000130313 | PGLS     | 0.491803279 | 3.134078212 |
| ENSG00000130368 | MAS1     | 0.491803279 | 3.134078212 |
| ENSG00000130449 | ZSWIM6   | 0.491803279 | 3.134078212 |
| ENSG00000130489 | SCO2     | 0.491803279 | 3.134078212 |
| ENSG00000130522 | JUND     | 0.491803279 | 3.134078212 |
| ENSG00000130558 | OLFM1    | 0.491803279 | 3.134078212 |
| ENSG00000130592 | LSP1     | 0.491803279 | 3.134078212 |
| ENSG00000130699 | TAF4     | 0.491803279 | 3.134078212 |
| ENSG00000130714 | POMT1    | 0.491803279 | 3.134078212 |
| ENSG00000130720 | FIBCD1   | 0.491803279 | 3.134078212 |

|                 |           |             |             |
|-----------------|-----------|-------------|-------------|
| ENSG00000130787 | HIP1R     | 0.491803279 | 3.134078212 |
| ENSG00000130812 | ANGPTL6   | 0.491803279 | 3.134078212 |
| ENSG00000130876 | SLC7A10   | 0.491803279 | 3.134078212 |
| ENSG00000130956 | HABP4     | 0.491803279 | 3.134078212 |
| ENSG00000130985 | UBA1      | 0.491803279 | 3.134078212 |
| ENSG00000131044 | TTL9      | 0.491803279 | 3.134078212 |
| ENSG00000131067 | GGT7      | 0.491803279 | 3.134078212 |
| ENSG00000131242 | RAB11FIP4 | 0.491803279 | 3.134078212 |
| ENSG00000131323 | TRAF3     | 0.491803279 | 3.134078212 |
| ENSG00000131446 | MGAT1     | 0.491803279 | 3.134078212 |
| ENSG00000131467 | PSME3     | 0.491803279 | 3.134078212 |
| ENSG00000131482 | G6PC      | 0.491803279 | 3.134078212 |
| ENSG00000131504 | DIAPH1    | 0.491803279 | 3.134078212 |
| ENSG00000131584 | ACAP3     | 0.491803279 | 3.134078212 |
| ENSG00000131669 | NINJ1     | 0.491803279 | 3.134078212 |
| ENSG00000131724 | IL13RA1   | 0.491803279 | 3.134078212 |
| ENSG00000131730 | CKMT2     | 0.491803279 | 3.134078212 |
| ENSG00000131738 | KRT33B    | 0.491803279 | 3.134078212 |
| ENSG00000131746 | TNS4      | 0.491803279 | 3.134078212 |
| ENSG00000131781 | FMO5      | 0.491803279 | 3.134078212 |
| ENSG00000131788 | PIAS3     | 0.491803279 | 3.134078212 |
| ENSG00000131808 | FSHB      | 0.491803279 | 3.134078212 |
| ENSG00000131849 | ZNF132    | 0.491803279 | 3.134078212 |
| ENSG00000131899 | LLGL1     | 0.491803279 | 3.134078212 |
| ENSG00000131979 | GCH1      | 0.491803279 | 3.134078212 |
| ENSG00000132130 | LHX1      | 0.491803279 | 3.134078212 |
| ENSG00000132199 | ENOSF1    | 0.491803279 | 3.134078212 |
| ENSG00000132297 | HHLA1     | 0.491803279 | 3.134078212 |
| ENSG00000132326 | PER2      | 0.491803279 | 3.134078212 |
| ENSG00000132330 | SCLY      | 0.491803279 | 3.134078212 |
| ENSG00000132424 | PNISR     | 0.491803279 | 3.134078212 |
| ENSG00000132510 | KDM6B     | 0.491803279 | 3.134078212 |
| ENSG00000132589 | FLOT2     | 0.491803279 | 3.134078212 |
| ENSG00000132604 | TERF2     | 0.491803279 | 3.134078212 |
| ENSG00000132671 | SSTR4     | 0.491803279 | 3.134078212 |
| ENSG00000132704 | FCRL2     | 0.491803279 | 3.134078212 |
| ENSG00000132744 | ACY3      | 0.491803279 | 3.134078212 |
| ENSG00000132781 | MUTYH     | 0.491803279 | 3.134078212 |
| ENSG00000132801 | ZSWIM3    | 0.491803279 | 3.134078212 |
| ENSG00000132840 | BHMT2     | 0.491803279 | 3.134078212 |
| ENSG00000132912 | DCTN4     | 0.491803279 | 3.134078212 |
| ENSG00000132958 | TPTE2     | 0.491803279 | 3.134078212 |
| ENSG00000132963 | POMP      | 0.491803279 | 3.134078212 |
| ENSG00000132975 | GPR12     | 0.491803279 | 3.134078212 |
| ENSG00000133103 | COG6      | 0.491803279 | 3.134078212 |
| ENSG00000133104 | SPG20     | 0.491803279 | 3.134078212 |
| ENSG00000133111 | RFXAP     | 0.491803279 | 3.134078212 |

|                 |         |             |             |
|-----------------|---------|-------------|-------------|
| ENSG00000133114 | GPALPP1 | 0.491803279 | 3.134078212 |
| ENSG00000133226 | SRRM1   | 0.491803279 | 3.134078212 |
| ENSG00000133315 | MACROD1 | 0.491803279 | 3.134078212 |
| ENSG00000133328 | HRASLS2 | 0.491803279 | 3.134078212 |
| ENSG00000133466 | C1QTNF6 | 0.491803279 | 3.134078212 |
| ENSG00000133574 | GIMAP4  | 0.491803279 | 3.134078212 |
| ENSG00000133704 | IPO8    | 0.491803279 | 3.134078212 |
| ENSG00000133731 | IMPA1   | 0.491803279 | 3.134078212 |
| ENSG00000134061 | CD180   | 0.491803279 | 3.134078212 |
| ENSG00000134138 | MEIS2   | 0.491803279 | 3.134078212 |
| ENSG00000134184 | GSTM1   | 0.491803279 | 3.134078212 |
| ENSG00000134200 | TSHB    | 0.491803279 | 3.134078212 |
| ENSG00000134262 | AP4B1   | 0.491803279 | 3.134078212 |
| ENSG00000134265 | NAPG    | 0.491803279 | 3.134078212 |
| ENSG00000134278 | SPIRE1  | 0.491803279 | 3.134078212 |
| ENSG00000134318 | ROCK2   | 0.491803279 | 3.134078212 |
| ENSG00000134326 | CMPK2   | 0.491803279 | 3.134078212 |
| ENSG00000134365 | CFHR4   | 0.491803279 | 3.134078212 |
| ENSG00000134376 | CRB1    | 0.491803279 | 3.134078212 |
| ENSG00000134504 | KCTD1   | 0.491803279 | 3.134078212 |
| ENSG00000134531 | EMP1    | 0.491803279 | 3.134078212 |
| ENSG00000134532 | SOX5    | 0.491803279 | 3.134078212 |
| ENSG00000134569 | LRP4    | 0.491803279 | 3.134078212 |
| ENSG00000134588 | USP26   | 0.491803279 | 3.134078212 |
| ENSG00000134668 | SPOCD1  | 0.491803279 | 3.134078212 |
| ENSG00000134762 | DSC3    | 0.491803279 | 3.134078212 |
| ENSG00000134765 | DSC1    | 0.491803279 | 3.134078212 |
| ENSG00000134769 | DTNA    | 0.491803279 | 3.134078212 |
| ENSG00000134817 | APLNR   | 0.491803279 | 3.134078212 |
| ENSG00000134955 | SLC37A2 | 0.491803279 | 3.134078212 |
| ENSG00000135090 | TAOK3   | 0.491803279 | 3.134078212 |
| ENSG00000135111 | TBX3    | 0.491803279 | 3.134078212 |
| ENSG00000135119 | RNFT2   | 0.491803279 | 3.134078212 |
| ENSG00000135164 | DMTF1   | 0.491803279 | 3.134078212 |
| ENSG00000135269 | TES     | 0.491803279 | 3.134078212 |
| ENSG00000135378 | PRRG4   | 0.491803279 | 3.134078212 |
| ENSG00000135437 | RDH5    | 0.491803279 | 3.134078212 |
| ENSG00000135441 | BLOC1S1 | 0.491803279 | 3.134078212 |
| ENSG00000135480 | KRT7    | 0.491803279 | 3.134078212 |
| ENSG00000135547 | HEY2    | 0.491803279 | 3.134078212 |
| ENSG00000135632 | SMYD5   | 0.491803279 | 3.134078212 |
| ENSG00000135638 | EMX1    | 0.491803279 | 3.134078212 |
| ENSG00000135723 | FHOD1   | 0.491803279 | 3.134078212 |
| ENSG00000135763 | URB2    | 0.491803279 | 3.134078212 |
| ENSG00000135845 | PIGC    | 0.491803279 | 3.134078212 |
| ENSG00000135945 | REV1    | 0.491803279 | 3.134078212 |
| ENSG00000135956 | TMEM127 | 0.491803279 | 3.134078212 |

|                 |          |             |             |
|-----------------|----------|-------------|-------------|
| ENSG00000136141 | LRCH1    | 0.491803279 | 3.134078212 |
| ENSG00000136144 | RCBTB1   | 0.491803279 | 3.134078212 |
| ENSG00000136240 | KDEL2    | 0.491803279 | 3.134078212 |
| ENSG00000136270 | TBRG4    | 0.491803279 | 3.134078212 |
| ENSG00000136279 | DBNL     | 0.491803279 | 3.134078212 |
| ENSG00000136371 | MTHFS    | 0.491803279 | 3.134078212 |
| ENSG00000136457 | CHAD     | 0.491803279 | 3.134078212 |
| ENSG00000136487 | GH2      | 0.491803279 | 3.134078212 |
| ENSG00000136631 | VPS45    | 0.491803279 | 3.134078212 |
| ENSG00000136636 | KCTD3    | 0.491803279 | 3.134078212 |
| ENSG00000136688 | IL36G    | 0.491803279 | 3.134078212 |
| ENSG00000136689 | IL1RN    | 0.491803279 | 3.134078212 |
| ENSG00000136718 | IMP4     | 0.491803279 | 3.134078212 |
| ENSG00000136802 | LRR8A    | 0.491803279 | 3.134078212 |
| ENSG00000136856 | SLC2A8   | 0.491803279 | 3.134078212 |
| ENSG00000136888 | ATP6V1G1 | 0.491803279 | 3.134078212 |
| ENSG00000136891 | TEX10    | 0.491803279 | 3.134078212 |
| ENSG00000136986 | DERL1    | 0.491803279 | 3.134078212 |
| ENSG00000137054 | POLR1E   | 0.491803279 | 3.134078212 |
| ENSG00000137076 | TLN1     | 0.491803279 | 3.134078212 |
| ENSG00000137166 | FOXP4    | 0.491803279 | 3.134078212 |
| ENSG00000137204 | SLC22A7  | 0.491803279 | 3.134078212 |
| ENSG00000137266 | SLC22A23 | 0.491803279 | 3.134078212 |
| ENSG00000137273 | FOXF2    | 0.491803279 | 3.134078212 |
| ENSG00000137288 | UQC2     | 0.491803279 | 3.134078212 |
| ENSG00000137343 | ATAT1    | 0.491803279 | 3.134078212 |
| ENSG00000137393 | RNF144B  | 0.491803279 | 3.134078212 |
| ENSG00000137473 | TTC29    | 0.491803279 | 3.134078212 |
| ENSG00000137500 | CCDC90B  | 0.491803279 | 3.134078212 |
| ENSG00000137513 | NARS2    | 0.491803279 | 3.134078212 |
| ENSG00000137561 | TTPA     | 0.491803279 | 3.134078212 |
| ENSG00000137642 | SORL1    | 0.491803279 | 3.134078212 |
| ENSG00000137692 | DCUN1D5  | 0.491803279 | 3.134078212 |
| ENSG00000137693 | YAP1     | 0.491803279 | 3.134078212 |
| ENSG00000137699 | TRIM29   | 0.491803279 | 3.134078212 |
| ENSG00000137776 | SLTM     | 0.491803279 | 3.134078212 |
| ENSG00000137822 | TUBGCP4  | 0.491803279 | 3.134078212 |
| ENSG00000137842 | TMEM62   | 0.491803279 | 3.134078212 |
| ENSG00000137857 | DUOX1    | 0.491803279 | 3.134078212 |
| ENSG00000137948 | BRDT     | 0.491803279 | 3.134078212 |
| ENSG00000137968 | SLC44A5  | 0.491803279 | 3.134078212 |
| ENSG00000137976 | DNASE2B  | 0.491803279 | 3.134078212 |
| ENSG00000138035 | PNPT1    | 0.491803279 | 3.134078212 |
| ENSG00000138080 | EMILIN1  | 0.491803279 | 3.134078212 |
| ENSG00000138081 | FBXO11   | 0.491803279 | 3.134078212 |
| ENSG00000138085 | ATRAID   | 0.491803279 | 3.134078212 |
| ENSG00000138101 | DTNB     | 0.491803279 | 3.134078212 |

|                 |           |             |             |
|-----------------|-----------|-------------|-------------|
| ENSG00000138111 | TMEM180   | 0.491803279 | 3.134078212 |
| ENSG00000138134 | STAMBPL1  | 0.491803279 | 3.134078212 |
| ENSG00000138207 | RBP4      | 0.491803279 | 3.134078212 |
| ENSG00000138286 | FAM149B1  | 0.491803279 | 3.134078212 |
| ENSG00000138378 | STAT4     | 0.491803279 | 3.134078212 |
| ENSG00000138439 | FAM117B   | 0.491803279 | 3.134078212 |
| ENSG00000138459 | SLC35A5   | 0.491803279 | 3.134078212 |
| ENSG00000138496 | PARP9     | 0.491803279 | 3.134078212 |
| ENSG00000138593 | SECISBP2L | 0.491803279 | 3.134078212 |
| ENSG00000138622 | HCN4      | 0.491803279 | 3.134078212 |
| ENSG00000138623 | SEMA7A    | 0.491803279 | 3.134078212 |
| ENSG00000138646 | HERC5     | 0.491803279 | 3.134078212 |
| ENSG00000138669 | PRKG2     | 0.491803279 | 3.134078212 |
| ENSG00000138674 | SEC31A    | 0.491803279 | 3.134078212 |
| ENSG00000138744 | NAAA      | 0.491803279 | 3.134078212 |
| ENSG00000138769 | CDKL2     | 0.491803279 | 3.134078212 |
| ENSG00000138777 | PPA2      | 0.491803279 | 3.134078212 |
| ENSG00000138801 | PAPSS1    | 0.491803279 | 3.134078212 |
| ENSG00000138814 | PPP3CA    | 0.491803279 | 3.134078212 |
| ENSG00000138821 | SLC39A8   | 0.491803279 | 3.134078212 |
| ENSG00000138942 | RNF185    | 0.491803279 | 3.134078212 |
| ENSG00000139192 | TAPBPL    | 0.491803279 | 3.134078212 |
| ENSG00000139197 | PEX5      | 0.491803279 | 3.134078212 |
| ENSG00000139266 | MARCH9    | 0.491803279 | 3.134078212 |
| ENSG00000139291 | TMEM19    | 0.491803279 | 3.134078212 |
| ENSG00000139323 | POC1B     | 0.491803279 | 3.134078212 |
| ENSG00000139350 | NEDD1     | 0.491803279 | 3.134078212 |
| ENSG00000139436 | GIT2      | 0.491803279 | 3.134078212 |
| ENSG00000139546 | TARBP2    | 0.491803279 | 3.134078212 |
| ENSG00000139625 | MAP3K12   | 0.491803279 | 3.134078212 |
| ENSG00000139636 | LMBR1L    | 0.491803279 | 3.134078212 |
| ENSG00000139835 | GRTP1     | 0.491803279 | 3.134078212 |
| ENSG00000139914 | FITM1     | 0.491803279 | 3.134078212 |
| ENSG00000139970 | RTN1      | 0.491803279 | 3.134078212 |
| ENSG00000140025 | EFCAB11   | 0.491803279 | 3.134078212 |
| ENSG00000140043 | PTGR2     | 0.491803279 | 3.134078212 |
| ENSG00000140264 | SERF2     | 0.491803279 | 3.134078212 |
| ENSG00000140297 | GCNT3     | 0.491803279 | 3.134078212 |
| ENSG00000140320 | BAHD1     | 0.491803279 | 3.134078212 |
| ENSG00000140379 | BCL2A1    | 0.491803279 | 3.134078212 |
| ENSG00000140403 | DNAJA4    | 0.491803279 | 3.134078212 |
| ENSG00000140451 | PIF1      | 0.491803279 | 3.134078212 |
| ENSG00000140564 | FURIN     | 0.491803279 | 3.134078212 |
| ENSG00000140600 | SH3GL3    | 0.491803279 | 3.134078212 |
| ENSG00000140623 | SEPT12    | 0.491803279 | 3.134078212 |
| ENSG00000140678 | ITGAX     | 0.491803279 | 3.134078212 |
| ENSG00000140876 | NUDT7     | 0.491803279 | 3.134078212 |

|                 |          |             |             |
|-----------------|----------|-------------|-------------|
| ENSG00000140905 | GCSH     | 0.491803279 | 3.134078212 |
| ENSG00000140948 | ZCCHC14  | 0.491803279 | 3.134078212 |
| ENSG00000140968 | IRF8     | 0.491803279 | 3.134078212 |
| ENSG00000141076 | CIRH1A   | 0.491803279 | 3.134078212 |
| ENSG00000141084 | RANBP10  | 0.491803279 | 3.134078212 |
| ENSG00000141096 | DPEP3    | 0.491803279 | 3.134078212 |
| ENSG00000141198 | TOM1L1   | 0.491803279 | 3.134078212 |
| ENSG00000141232 | TOB1     | 0.491803279 | 3.134078212 |
| ENSG00000141252 | VPS53    | 0.491803279 | 3.134078212 |
| ENSG00000141279 | NPEPPS   | 0.491803279 | 3.134078212 |
| ENSG00000141376 | BCAS3    | 0.491803279 | 3.134078212 |
| ENSG00000141425 | RPRD1A   | 0.491803279 | 3.134078212 |
| ENSG00000141446 | ESCO1    | 0.491803279 | 3.134078212 |
| ENSG00000141497 | ZMYND15  | 0.491803279 | 3.134078212 |
| ENSG00000141526 | SLC16A3  | 0.491803279 | 3.134078212 |
| ENSG00000141540 | TTYH2    | 0.491803279 | 3.134078212 |
| ENSG00000141564 | RPTOR    | 0.491803279 | 3.134078212 |
| ENSG00000141627 | DYM      | 0.491803279 | 3.134078212 |
| ENSG00000141698 | NT5C3B   | 0.491803279 | 3.134078212 |
| ENSG00000141744 | PNMT     | 0.491803279 | 3.134078212 |
| ENSG00000141748 | ARL5C    | 0.491803279 | 3.134078212 |
| ENSG00000141858 | SAMD1    | 0.491803279 | 3.134078212 |
| ENSG00000141968 | VAV1     | 0.491803279 | 3.134078212 |
| ENSG00000142046 | TMEM91   | 0.491803279 | 3.134078212 |
| ENSG00000142319 | SLC6A3   | 0.491803279 | 3.134078212 |
| ENSG00000142459 | EVI5L    | 0.491803279 | 3.134078212 |
| ENSG00000142494 | SLC47A1  | 0.491803279 | 3.134078212 |
| ENSG00000142515 | KLK3     | 0.491803279 | 3.134078212 |
| ENSG00000142606 | MMEL1    | 0.491803279 | 3.134078212 |
| ENSG00000142789 | CELA3A   | 0.491803279 | 3.134078212 |
| ENSG00000143006 | DMRTB1   | 0.491803279 | 3.134078212 |
| ENSG00000143093 | STRIP1   | 0.491803279 | 3.134078212 |
| ENSG00000143105 | KCNA10   | 0.491803279 | 3.134078212 |
| ENSG00000143156 | NME7     | 0.491803279 | 3.134078212 |
| ENSG00000143190 | POU2F1   | 0.491803279 | 3.134078212 |
| ENSG00000143196 | DPT      | 0.491803279 | 3.134078212 |
| ENSG00000143333 | RGS16    | 0.491803279 | 3.134078212 |
| ENSG00000143337 | TOR1AIP1 | 0.491803279 | 3.134078212 |
| ENSG00000143363 | PRUNE    | 0.491803279 | 3.134078212 |
| ENSG00000143379 | SETDB1   | 0.491803279 | 3.134078212 |
| ENSG00000143398 | PIP5K1A  | 0.491803279 | 3.134078212 |
| ENSG00000143420 | ENSA     | 0.491803279 | 3.134078212 |
| ENSG00000143436 | MRPL9    | 0.491803279 | 3.134078212 |
| ENSG00000143494 | VASH2    | 0.491803279 | 3.134078212 |
| ENSG00000143499 | SMYD2    | 0.491803279 | 3.134078212 |
| ENSG00000143578 | CREB3L4  | 0.491803279 | 3.134078212 |
| ENSG00000143614 | GATAD2B  | 0.491803279 | 3.134078212 |

|                 |          |             |             |
|-----------------|----------|-------------|-------------|
| ENSG00000143624 | INTS3    | 0.491803279 | 3.134078212 |
| ENSG00000143653 | SCCPDH   | 0.491803279 | 3.134078212 |
| ENSG00000143702 | CEP170   | 0.491803279 | 3.134078212 |
| ENSG00000143751 | SDE2     | 0.491803279 | 3.134078212 |
| ENSG00000143771 | CNIH4    | 0.491803279 | 3.134078212 |
| ENSG00000143793 | C1orf35  | 0.491803279 | 3.134078212 |
| ENSG00000143839 | REN      | 0.491803279 | 3.134078212 |
| ENSG00000143942 | CHAC2    | 0.491803279 | 3.134078212 |
| ENSG00000144061 | NPHP1    | 0.491803279 | 3.134078212 |
| ENSG00000144115 | THNSL2   | 0.491803279 | 3.134078212 |
| ENSG00000144224 | UBXN4    | 0.491803279 | 3.134078212 |
| ENSG00000144290 | SLC4A10  | 0.491803279 | 3.134078212 |
| ENSG00000144306 | SCRN3    | 0.491803279 | 3.134078212 |
| ENSG00000144524 | COPS7B   | 0.491803279 | 3.134078212 |
| ENSG00000144559 | TAMM41   | 0.491803279 | 3.134078212 |
| ENSG00000144579 | CTDSP1   | 0.491803279 | 3.134078212 |
| ENSG00000144677 | CTDSPL   | 0.491803279 | 3.134078212 |
| ENSG00000144724 | PTPRG    | 0.491803279 | 3.134078212 |
| ENSG00000144741 | SLC25A26 | 0.491803279 | 3.134078212 |
| ENSG00000144840 | RABL3    | 0.491803279 | 3.134078212 |
| ENSG00000144867 | SRPRB    | 0.491803279 | 3.134078212 |
| ENSG00000144895 | EIF2A    | 0.491803279 | 3.134078212 |
| ENSG00000145107 | TM4SF19  | 0.491803279 | 3.134078212 |
| ENSG00000145321 | GC       | 0.491803279 | 3.134078212 |
| ENSG00000145348 | TBCK     | 0.491803279 | 3.134078212 |
| ENSG00000145349 | CAMK2D   | 0.491803279 | 3.134078212 |
| ENSG00000145391 | SETD7    | 0.491803279 | 3.134078212 |
| ENSG00000145675 | PIK3R1   | 0.491803279 | 3.134078212 |
| ENSG00000145757 | SPATA9   | 0.491803279 | 3.134078212 |
| ENSG00000145777 | TSLP     | 0.491803279 | 3.134078212 |
| ENSG00000145794 | MEGF10   | 0.491803279 | 3.134078212 |
| ENSG00000145808 | ADAMTS19 | 0.491803279 | 3.134078212 |
| ENSG00000145824 | CXCL14   | 0.491803279 | 3.134078212 |
| ENSG00000145832 | SLC25A48 | 0.491803279 | 3.134078212 |
| ENSG00000145911 | N4BP3    | 0.491803279 | 3.134078212 |
| ENSG00000145912 | NHP2     | 0.491803279 | 3.134078212 |
| ENSG00000145916 | RMND5B   | 0.491803279 | 3.134078212 |
| ENSG00000145990 | GFOD1    | 0.491803279 | 3.134078212 |
| ENSG00000146021 | KLHL3    | 0.491803279 | 3.134078212 |
| ENSG00000146070 | PLA2G7   | 0.491803279 | 3.134078212 |
| ENSG00000146109 | ABT1     | 0.491803279 | 3.134078212 |
| ENSG00000146232 | NFKBIE   | 0.491803279 | 3.134078212 |
| ENSG00000146247 | PHIP     | 0.491803279 | 3.134078212 |
| ENSG00000146250 | PRSS35   | 0.491803279 | 3.134078212 |
| ENSG00000146263 | MMS22L   | 0.491803279 | 3.134078212 |
| ENSG00000146378 | TAAR2    | 0.491803279 | 3.134078212 |
| ENSG00000146385 | TAAR8    | 0.491803279 | 3.134078212 |

|                 |          |             |             |
|-----------------|----------|-------------|-------------|
| ENSG00000146410 | MTFR2    | 0.491803279 | 3.134078212 |
| ENSG00000146416 | AIG1     | 0.491803279 | 3.134078212 |
| ENSG00000146425 | DYNLT1   | 0.491803279 | 3.134078212 |
| ENSG00000146433 | TMEM181  | 0.491803279 | 3.134078212 |
| ENSG00000146453 | PNLDC1   | 0.491803279 | 3.134078212 |
| ENSG00000146457 | WTAP     | 0.491803279 | 3.134078212 |
| ENSG00000146576 | C7orf26  | 0.491803279 | 3.134078212 |
| ENSG00000146674 | IGFBP3   | 0.491803279 | 3.134078212 |
| ENSG00000146802 | TMEM168  | 0.491803279 | 3.134078212 |
| ENSG00000146830 | GIGYF1   | 0.491803279 | 3.134078212 |
| ENSG00000147081 | AKAP4    | 0.491803279 | 3.134078212 |
| ENSG00000147155 | EBP      | 0.491803279 | 3.134078212 |
| ENSG00000147174 | ACRC     | 0.491803279 | 3.134078212 |
| ENSG00000147183 | CPXCR1   | 0.491803279 | 3.134078212 |
| ENSG00000147206 | NXF3     | 0.491803279 | 3.134078212 |
| ENSG00000147223 | RIPPLY1  | 0.491803279 | 3.134078212 |
| ENSG00000147246 | HTR2C    | 0.491803279 | 3.134078212 |
| ENSG00000147257 | GPC3     | 0.491803279 | 3.134078212 |
| ENSG00000147274 | RBMX     | 0.491803279 | 3.134078212 |
| ENSG00000147364 | FBXO25   | 0.491803279 | 3.134078212 |
| ENSG00000147457 | CHMP7    | 0.491803279 | 3.134078212 |
| ENSG00000147465 | STAR     | 0.491803279 | 3.134078212 |
| ENSG00000147571 | CRH      | 0.491803279 | 3.134078212 |
| ENSG00000147601 | TERF1    | 0.491803279 | 3.134078212 |
| ENSG00000147679 | UTP23    | 0.491803279 | 3.134078212 |
| ENSG00000147687 | TATDN1   | 0.491803279 | 3.134078212 |
| ENSG00000147853 | AK3      | 0.491803279 | 3.134078212 |
| ENSG00000147872 | PLIN2    | 0.491803279 | 3.134078212 |
| ENSG00000147885 | IFNA16   | 0.491803279 | 3.134078212 |
| ENSG00000147889 | CDKN2A   | 0.491803279 | 3.134078212 |
| ENSG00000148358 | GPR107   | 0.491803279 | 3.134078212 |
| ENSG00000148384 | INPP5E   | 0.491803279 | 3.134078212 |
| ENSG00000148482 | SLC39A12 | 0.491803279 | 3.134078212 |
| ENSG00000148488 | ST8SIA6  | 0.491803279 | 3.134078212 |
| ENSG00000148516 | ZEB1     | 0.491803279 | 3.134078212 |
| ENSG00000148841 | ITPRIP   | 0.491803279 | 3.134078212 |
| ENSG00000148848 | ADAM12   | 0.491803279 | 3.134078212 |
| ENSG00000148926 | ADM      | 0.491803279 | 3.134078212 |
| ENSG00000148935 | GAS2     | 0.491803279 | 3.134078212 |
| ENSG00000148950 | IMMP1L   | 0.491803279 | 3.134078212 |
| ENSG00000149089 | APIP     | 0.491803279 | 3.134078212 |
| ENSG00000149150 | SLC43A1  | 0.491803279 | 3.134078212 |
| ENSG00000149177 | PTPRJ    | 0.491803279 | 3.134078212 |
| ENSG00000149212 | SESN3    | 0.491803279 | 3.134078212 |
| ENSG00000149262 | INTS4    | 0.491803279 | 3.134078212 |
| ENSG00000149273 | RPS3     | 0.491803279 | 3.134078212 |
| ENSG00000149289 | ZC3H12C  | 0.491803279 | 3.134078212 |

|                 |          |             |             |
|-----------------|----------|-------------|-------------|
| ENSG00000149403 | GRIK4    | 0.491803279 | 3.134078212 |
| ENSG00000149443 | C20orf78 | 0.491803279 | 3.134078212 |
| ENSG00000149516 | MS4A3    | 0.491803279 | 3.134078212 |
| ENSG00000149599 | DUSP15   | 0.491803279 | 3.134078212 |
| ENSG00000149792 | MRPL49   | 0.491803279 | 3.134078212 |
| ENSG00000149929 | HIRIP3   | 0.491803279 | 3.134078212 |
| ENSG00000149930 | TAOK2    | 0.491803279 | 3.134078212 |
| ENSG00000149972 | CNTN5    | 0.491803279 | 3.134078212 |
| ENSG00000150054 | MPP7     | 0.491803279 | 3.134078212 |
| ENSG00000150637 | CD226    | 0.491803279 | 3.134078212 |
| ENSG00000150753 | CCT5     | 0.491803279 | 3.134078212 |
| ENSG00000150768 | DLAT     | 0.491803279 | 3.134078212 |
| ENSG00000150977 | RILPL2   | 0.491803279 | 3.134078212 |
| ENSG00000151006 | PRSS53   | 0.491803279 | 3.134078212 |
| ENSG00000151116 | UEVLD    | 0.491803279 | 3.134078212 |
| ENSG00000151136 | BTBD11   | 0.491803279 | 3.134078212 |
| ENSG00000151208 | DLG5     | 0.491803279 | 3.134078212 |
| ENSG00000151422 | FER      | 0.491803279 | 3.134078212 |
| ENSG00000151475 | SLC25A31 | 0.491803279 | 3.134078212 |
| ENSG00000151498 | ACAD8    | 0.491803279 | 3.134078212 |
| ENSG00000151576 | QTRTD1   | 0.491803279 | 3.134078212 |
| ENSG00000151623 | NR3C2    | 0.491803279 | 3.134078212 |
| ENSG00000151689 | INPP1    | 0.491803279 | 3.134078212 |
| ENSG00000151693 | ASAP2    | 0.491803279 | 3.134078212 |
| ENSG00000151790 | TDO2     | 0.491803279 | 3.134078212 |
| ENSG00000152086 | TUBA3E   | 0.491803279 | 3.134078212 |
| ENSG00000152128 | TMEM163  | 0.491803279 | 3.134078212 |
| ENSG00000152133 | GPATCH11 | 0.491803279 | 3.134078212 |
| ENSG00000152208 | GRID2    | 0.491803279 | 3.134078212 |
| ENSG00000152242 | C18orf25 | 0.491803279 | 3.134078212 |
| ENSG00000152433 | ZNF547   | 0.491803279 | 3.134078212 |
| ENSG00000152763 | WDR78    | 0.491803279 | 3.134078212 |
| ENSG00000152766 | ANKRD22  | 0.491803279 | 3.134078212 |
| ENSG00000152778 | IFIT5    | 0.491803279 | 3.134078212 |
| ENSG00000152784 | PRDM8    | 0.491803279 | 3.134078212 |
| ENSG00000152953 | STK32B   | 0.491803279 | 3.134078212 |
| ENSG00000153132 | CLGN     | 0.491803279 | 3.134078212 |
| ENSG00000153208 | MERTK    | 0.491803279 | 3.134078212 |
| ENSG00000153291 | SLC25A27 | 0.491803279 | 3.134078212 |
| ENSG00000153303 | FRMD1    | 0.491803279 | 3.134078212 |
| ENSG00000153395 | LPCAT1   | 0.491803279 | 3.134078212 |
| ENSG00000153560 | UBP1     | 0.491803279 | 3.134078212 |
| ENSG00000153563 | CD8A     | 0.491803279 | 3.134078212 |
| ENSG00000153786 | ZDHHC7   | 0.491803279 | 3.134078212 |
| ENSG00000153814 | JAZF1    | 0.491803279 | 3.134078212 |
| ENSG00000153820 | SPHKAP   | 0.491803279 | 3.134078212 |
| ENSG00000153822 | KCNJ16   | 0.491803279 | 3.134078212 |

|                 |          |             |             |
|-----------------|----------|-------------|-------------|
| ENSG00000153827 | TRIP12   | 0.491803279 | 3.134078212 |
| ENSG00000153902 | LGI4     | 0.491803279 | 3.134078212 |
| ENSG00000153956 | CACNA2D1 | 0.491803279 | 3.134078212 |
| ENSG00000154065 | ANKRD29  | 0.491803279 | 3.134078212 |
| ENSG00000154188 | ANGPT1   | 0.491803279 | 3.134078212 |
| ENSG00000154222 | CC2D1B   | 0.491803279 | 3.134078212 |
| ENSG00000154277 | UCHL1    | 0.491803279 | 3.134078212 |
| ENSG00000154330 | PGM5     | 0.491803279 | 3.134078212 |
| ENSG00000154380 | ENAH     | 0.491803279 | 3.134078212 |
| ENSG00000154438 | ASZ1     | 0.491803279 | 3.134078212 |
| ENSG00000154473 | BUB3     | 0.491803279 | 3.134078212 |
| ENSG00000154479 | CCDC173  | 0.491803279 | 3.134078212 |
| ENSG00000154518 | ATP5G3   | 0.491803279 | 3.134078212 |
| ENSG00000154654 | NCAM2    | 0.491803279 | 3.134078212 |
| ENSG00000154655 | L3MBTL4  | 0.491803279 | 3.134078212 |
| ENSG00000154814 | OXNAD1   | 0.491803279 | 3.134078212 |
| ENSG00000154928 | EPHB1    | 0.491803279 | 3.134078212 |
| ENSG00000155744 | FAM126B  | 0.491803279 | 3.134078212 |
| ENSG00000155749 | ALS2CR12 | 0.491803279 | 3.134078212 |
| ENSG00000155827 | RNF20    | 0.491803279 | 3.134078212 |
| ENSG00000155850 | SLC26A2  | 0.491803279 | 3.134078212 |
| ENSG00000155858 | LSM11    | 0.491803279 | 3.134078212 |
| ENSG00000155886 | SLC24A2  | 0.491803279 | 3.134078212 |
| ENSG00000155966 | AFF2     | 0.491803279 | 3.134078212 |
| ENSG00000156009 | MAGEA8   | 0.491803279 | 3.134078212 |
| ENSG00000156017 | C9orf41  | 0.491803279 | 3.134078212 |
| ENSG00000156030 | ELMSAN1  | 0.491803279 | 3.134078212 |
| ENSG00000156103 | MMP16    | 0.491803279 | 3.134078212 |
| ENSG00000156162 | DPY19L4  | 0.491803279 | 3.134078212 |
| ENSG00000156381 | ANKRD9   | 0.491803279 | 3.134078212 |
| ENSG00000156574 | NODAL    | 0.491803279 | 3.134078212 |
| ENSG00000156639 | ZFAND3   | 0.491803279 | 3.134078212 |
| ENSG00000156687 | UNC5D    | 0.491803279 | 3.134078212 |
| ENSG00000156697 | UTP14A   | 0.491803279 | 3.134078212 |
| ENSG00000156735 | BAG4     | 0.491803279 | 3.134078212 |
| ENSG00000156802 | ATAD2    | 0.491803279 | 3.134078212 |
| ENSG00000156804 | FBXO32   | 0.491803279 | 3.134078212 |
| ENSG00000156928 | MALSU1   | 0.491803279 | 3.134078212 |
| ENSG00000157017 | GHRL     | 0.491803279 | 3.134078212 |
| ENSG00000157064 | NMNAT2   | 0.491803279 | 3.134078212 |
| ENSG00000157093 | LYZL4    | 0.491803279 | 3.134078212 |
| ENSG00000157106 | SMG1     | 0.491803279 | 3.134078212 |
| ENSG00000157303 | SUSD3    | 0.491803279 | 3.134078212 |
| ENSG00000157326 | DHRS4    | 0.491803279 | 3.134078212 |
| ENSG00000157349 | DDX19B   | 0.491803279 | 3.134078212 |
| ENSG00000157470 | FAM81A   | 0.491803279 | 3.134078212 |
| ENSG00000157510 | AFAP1L1  | 0.491803279 | 3.134078212 |

|                 |          |             |             |
|-----------------|----------|-------------|-------------|
| ENSG00000157593 | SLC35B2  | 0.491803279 | 3.134078212 |
| ENSG00000157693 | C9orf91  | 0.491803279 | 3.134078212 |
| ENSG00000157734 | SNX22    | 0.491803279 | 3.134078212 |
| ENSG00000157833 | GAREML   | 0.491803279 | 3.134078212 |
| ENSG00000157881 | PANK4    | 0.491803279 | 3.134078212 |
| ENSG00000157927 | RADIL    | 0.491803279 | 3.134078212 |
| ENSG00000158050 | DUSP2    | 0.491803279 | 3.134078212 |
| ENSG00000158169 | FANCC    | 0.491803279 | 3.134078212 |
| ENSG00000158258 | CLSTN2   | 0.491803279 | 3.134078212 |
| ENSG00000158270 | COLEC12  | 0.491803279 | 3.134078212 |
| ENSG00000158296 | SLC13A3  | 0.491803279 | 3.134078212 |
| ENSG00000158301 | GPRASP2  | 0.491803279 | 3.134078212 |
| ENSG00000158321 | AUTS2    | 0.491803279 | 3.134078212 |
| ENSG00000158458 | NRG2     | 0.491803279 | 3.134078212 |
| ENSG00000158578 | ALAS2    | 0.491803279 | 3.134078212 |
| ENSG00000158715 | SLC45A3  | 0.491803279 | 3.134078212 |
| ENSG00000158793 | NIT1     | 0.491803279 | 3.134078212 |
| ENSG00000159131 | GART     | 0.491803279 | 3.134078212 |
| ENSG00000159189 | C1QC     | 0.491803279 | 3.134078212 |
| ENSG00000159208 | C1orf51  | 0.491803279 | 3.134078212 |
| ENSG00000159216 | RUNX1    | 0.491803279 | 3.134078212 |
| ENSG00000159592 | GPBP1L1  | 0.491803279 | 3.134078212 |
| ENSG00000159674 | SPON2    | 0.491803279 | 3.134078212 |
| ENSG00000159685 | CHCHD6   | 0.491803279 | 3.134078212 |
| ENSG00000160062 | ZBTB8A   | 0.491803279 | 3.134078212 |
| ENSG00000160094 | ZNF362   | 0.491803279 | 3.134078212 |
| ENSG00000160097 | FNDC5    | 0.491803279 | 3.134078212 |
| ENSG00000160207 | HSF2BP   | 0.491803279 | 3.134078212 |
| ENSG00000160218 | TRAPPC10 | 0.491803279 | 3.134078212 |
| ENSG00000160223 | ICOSLG   | 0.491803279 | 3.134078212 |
| ENSG00000160226 | C21orf2  | 0.491803279 | 3.134078212 |
| ENSG00000160282 | FTCD     | 0.491803279 | 3.134078212 |
| ENSG00000160345 | C9orf116 | 0.491803279 | 3.134078212 |
| ENSG00000160396 | HIPK4    | 0.491803279 | 3.134078212 |
| ENSG00000160410 | SHKBP1   | 0.491803279 | 3.134078212 |
| ENSG00000160460 | SPTBN4   | 0.491803279 | 3.134078212 |
| ENSG00000160472 | TMEM190  | 0.491803279 | 3.134078212 |
| ENSG00000160588 | MPZL3    | 0.491803279 | 3.134078212 |
| ENSG00000160716 | CHRN2    | 0.491803279 | 3.134078212 |
| ENSG00000160741 | CRTC2    | 0.491803279 | 3.134078212 |
| ENSG00000160877 | NACC1    | 0.491803279 | 3.134078212 |
| ENSG00000161082 | CELF5    | 0.491803279 | 3.134078212 |
| ENSG00000161202 | DVL3     | 0.491803279 | 3.134078212 |
| ENSG00000161542 | PRPSAP1  | 0.491803279 | 3.134078212 |
| ENSG00000161800 | RACGAP1  | 0.491803279 | 3.134078212 |
| ENSG00000161904 | LEMD2    | 0.491803279 | 3.134078212 |
| ENSG00000161911 | TREML1   | 0.491803279 | 3.134078212 |

|                 |          |             |             |
|-----------------|----------|-------------|-------------|
| ENSG00000162068 | NTN3     | 0.491803279 | 3.134078212 |
| ENSG00000162139 | NEU3     | 0.491803279 | 3.134078212 |
| ENSG00000162227 | TAF6L    | 0.491803279 | 3.134078212 |
| ENSG00000162377 | COA7     | 0.491803279 | 3.134078212 |
| ENSG00000162413 | KLHL21   | 0.491803279 | 3.134078212 |
| ENSG00000162437 | RAVER2   | 0.491803279 | 3.134078212 |
| ENSG00000162460 | TMEM82   | 0.491803279 | 3.134078212 |
| ENSG00000162493 | PDPN     | 0.491803279 | 3.134078212 |
| ENSG00000162496 | DHRS3    | 0.491803279 | 3.134078212 |
| ENSG00000162520 | SYNC     | 0.491803279 | 3.134078212 |
| ENSG00000162607 | USP1     | 0.491803279 | 3.134078212 |
| ENSG00000162623 | TYW3     | 0.491803279 | 3.134078212 |
| ENSG00000162704 | ARPC5    | 0.491803279 | 3.134078212 |
| ENSG00000162878 | PKDCC    | 0.491803279 | 3.134078212 |
| ENSG00000162928 | PEX13    | 0.491803279 | 3.134078212 |
| ENSG00000163002 | NUP35    | 0.491803279 | 3.134078212 |
| ENSG00000163050 | ADCK3    | 0.491803279 | 3.134078212 |
| ENSG00000163060 | TEKT4    | 0.491803279 | 3.134078212 |
| ENSG00000163067 | ZNF2     | 0.491803279 | 3.134078212 |
| ENSG00000163082 | SGPP2    | 0.491803279 | 3.134078212 |
| ENSG00000163093 | BBS5     | 0.491803279 | 3.134078212 |
| ENSG00000163098 | BIRC8    | 0.491803279 | 3.134078212 |
| ENSG00000163141 | BNIP1    | 0.491803279 | 3.134078212 |
| ENSG00000163209 | SPRR3    | 0.491803279 | 3.134078212 |
| ENSG00000163239 | TDRD10   | 0.491803279 | 3.134078212 |
| ENSG00000163254 | CRYGC    | 0.491803279 | 3.134078212 |
| ENSG00000163263 | C1orf189 | 0.491803279 | 3.134078212 |
| ENSG00000163286 | ALPPL2   | 0.491803279 | 3.134078212 |
| ENSG00000163382 | APOA1BP  | 0.491803279 | 3.134078212 |
| ENSG00000163389 | POGLUT1  | 0.491803279 | 3.134078212 |
| ENSG00000163394 | CCKAR    | 0.491803279 | 3.134078212 |
| ENSG00000163406 | SLC15A2  | 0.491803279 | 3.134078212 |
| ENSG00000163428 | LRRC58   | 0.491803279 | 3.134078212 |
| ENSG00000163444 | TMEM183A | 0.491803279 | 3.134078212 |
| ENSG00000163449 | TMEM169  | 0.491803279 | 3.134078212 |
| ENSG00000163467 | TSACC    | 0.491803279 | 3.134078212 |
| ENSG00000163485 | ADORA1   | 0.491803279 | 3.134078212 |
| ENSG00000163491 | NEK10    | 0.491803279 | 3.134078212 |
| ENSG00000163501 | IHH      | 0.491803279 | 3.134078212 |
| ENSG00000163530 | DPPA2    | 0.491803279 | 3.134078212 |
| ENSG00000163563 | MNDA     | 0.491803279 | 3.134078212 |
| ENSG00000163626 | COX18    | 0.491803279 | 3.134078212 |
| ENSG00000163631 | ALB      | 0.491803279 | 3.134078212 |
| ENSG00000163646 | CLRN1    | 0.491803279 | 3.134078212 |
| ENSG00000163683 | SMIM14   | 0.491803279 | 3.134078212 |
| ENSG00000163719 | MTMR14   | 0.491803279 | 3.134078212 |
| ENSG00000163811 | WDR43    | 0.491803279 | 3.134078212 |

|                 |           |             |             |
|-----------------|-----------|-------------|-------------|
| ENSG00000163818 | LZTFL1    | 0.491803279 | 3.134078212 |
| ENSG00000163823 | CCR1      | 0.491803279 | 3.134078212 |
| ENSG00000163909 | HEYL      | 0.491803279 | 3.134078212 |
| ENSG00000163939 | PBRM1     | 0.491803279 | 3.134078212 |
| ENSG00000163961 | RNF168    | 0.491803279 | 3.134078212 |
| ENSG00000163964 | PIGX      | 0.491803279 | 3.134078212 |
| ENSG00000163995 | ABLIM2    | 0.491803279 | 3.134078212 |
| ENSG00000164011 | ZNF691    | 0.491803279 | 3.134078212 |
| ENSG00000164035 | EMCN      | 0.491803279 | 3.134078212 |
| ENSG00000164045 | CDC25A    | 0.491803279 | 3.134078212 |
| ENSG00000164066 | INTU      | 0.491803279 | 3.134078212 |
| ENSG00000164078 | MST1R     | 0.491803279 | 3.134078212 |
| ENSG00000164081 | TEX264    | 0.491803279 | 3.134078212 |
| ENSG00000164087 | POC1A     | 0.491803279 | 3.134078212 |
| ENSG00000164099 | PRSS12    | 0.491803279 | 3.134078212 |
| ENSG00000164117 | FBXO8     | 0.491803279 | 3.134078212 |
| ENSG00000164118 | CEP44     | 0.491803279 | 3.134078212 |
| ENSG00000164134 | NAA15     | 0.491803279 | 3.134078212 |
| ENSG00000164161 | HHIP      | 0.491803279 | 3.134078212 |
| ENSG00000164171 | ITGA2     | 0.491803279 | 3.134078212 |
| ENSG00000164209 | SLC25A46  | 0.491803279 | 3.134078212 |
| ENSG00000164221 | CCDC112   | 0.491803279 | 3.134078212 |
| ENSG00000164244 | PRRC1     | 0.491803279 | 3.134078212 |
| ENSG00000164325 | TMEM174   | 0.491803279 | 3.134078212 |
| ENSG00000164327 | RICTOR    | 0.491803279 | 3.134078212 |
| ENSG00000164330 | EBF1      | 0.491803279 | 3.134078212 |
| ENSG00000164338 | UTP15     | 0.491803279 | 3.134078212 |
| ENSG00000164404 | GDF9      | 0.491803279 | 3.134078212 |
| ENSG00000164430 | MB21D1    | 0.491803279 | 3.134078212 |
| ENSG00000164434 | FABP7     | 0.491803279 | 3.134078212 |
| ENSG00000164500 | C7orf72   | 0.491803279 | 3.134078212 |
| ENSG00000164506 | STXBP5    | 0.491803279 | 3.134078212 |
| ENSG00000164508 | HIST1H2AA | 0.491803279 | 3.134078212 |
| ENSG00000164588 | HCN1      | 0.491803279 | 3.134078212 |
| ENSG00000164609 | SLU7      | 0.491803279 | 3.134078212 |
| ENSG00000164638 | SLC29A4   | 0.491803279 | 3.134078212 |
| ENSG00000164684 | ZNF704    | 0.491803279 | 3.134078212 |
| ENSG00000164695 | CHMP4C    | 0.491803279 | 3.134078212 |
| ENSG00000164729 | SLC35G3   | 0.491803279 | 3.134078212 |
| ENSG00000164778 | EN2       | 0.491803279 | 3.134078212 |
| ENSG00000164830 | OXR1      | 0.491803279 | 3.134078212 |
| ENSG00000164850 | GPER1     | 0.491803279 | 3.134078212 |
| ENSG00000164867 | NOS3      | 0.491803279 | 3.134078212 |
| ENSG00000164889 | SLC4A2    | 0.491803279 | 3.134078212 |
| ENSG00000164904 | ALDH7A1   | 0.491803279 | 3.134078212 |
| ENSG00000164934 | DCAF13    | 0.491803279 | 3.134078212 |
| ENSG00000164935 | DCSTAMP   | 0.491803279 | 3.134078212 |

|                 |          |             |             |
|-----------------|----------|-------------|-------------|
| ENSG00000164978 | NUDT2    | 0.491803279 | 3.134078212 |
| ENSG00000164985 | PSIP1    | 0.491803279 | 3.134078212 |
| ENSG00000165076 | PRSS37   | 0.491803279 | 3.134078212 |
| ENSG00000165125 | TRPV6    | 0.491803279 | 3.134078212 |
| ENSG00000165271 | NOL6     | 0.491803279 | 3.134078212 |
| ENSG00000165300 | SLITRK5  | 0.491803279 | 3.134078212 |
| ENSG00000165309 | ARMC3    | 0.491803279 | 3.134078212 |
| ENSG00000165312 | OTUD1    | 0.491803279 | 3.134078212 |
| ENSG00000165322 | ARHGAP12 | 0.491803279 | 3.134078212 |
| ENSG00000165370 | GPR101   | 0.491803279 | 3.134078212 |
| ENSG00000165406 | MARCH8   | 0.491803279 | 3.134078212 |
| ENSG00000165417 | GTF2A1   | 0.491803279 | 3.134078212 |
| ENSG00000165480 | SKA3     | 0.491803279 | 3.134078212 |
| ENSG00000165501 | LRR1     | 0.491803279 | 3.134078212 |
| ENSG00000165553 | NGB      | 0.491803279 | 3.134078212 |
| ENSG00000165632 | TAF3     | 0.491803279 | 3.134078212 |
| ENSG00000165678 | GHITM    | 0.491803279 | 3.134078212 |
| ENSG00000165688 | PMPCA    | 0.491803279 | 3.134078212 |
| ENSG00000165694 | FRMD7    | 0.491803279 | 3.134078212 |
| ENSG00000165695 | AK8      | 0.491803279 | 3.134078212 |
| ENSG00000165699 | TSC1     | 0.491803279 | 3.134078212 |
| ENSG00000165702 | GFI1B    | 0.491803279 | 3.134078212 |
| ENSG00000165714 | LOH12CR1 | 0.491803279 | 3.134078212 |
| ENSG00000165757 | KIAA1462 | 0.491803279 | 3.134078212 |
| ENSG00000165794 | SLC39A2  | 0.491803279 | 3.134078212 |
| ENSG00000165806 | CASP7    | 0.491803279 | 3.134078212 |
| ENSG00000165807 | PPP1R36  | 0.491803279 | 3.134078212 |
| ENSG00000165810 | BTNL9    | 0.491803279 | 3.134078212 |
| ENSG00000165915 | SLC39A13 | 0.491803279 | 3.134078212 |
| ENSG00000165970 | SLC6A5   | 0.491803279 | 3.134078212 |
| ENSG00000166035 | LIPC     | 0.491803279 | 3.134078212 |
| ENSG00000166069 | TMCO5A   | 0.491803279 | 3.134078212 |
| ENSG00000166148 | AVPR1A   | 0.491803279 | 3.134078212 |
| ENSG00000166164 | BRD7     | 0.491803279 | 3.134078212 |
| ENSG00000166183 | ASPG     | 0.491803279 | 3.134078212 |
| ENSG00000166220 | TBATA    | 0.491803279 | 3.134078212 |
| ENSG00000166317 | SYNPO2L  | 0.491803279 | 3.134078212 |
| ENSG00000166394 | CYB5R2   | 0.491803279 | 3.134078212 |
| ENSG00000166501 | PRKCB    | 0.491803279 | 3.134078212 |
| ENSG00000166546 | BEAN1    | 0.491803279 | 3.134078212 |
| ENSG00000166592 | RRAD     | 0.491803279 | 3.134078212 |
| ENSG00000166796 | LDHC     | 0.491803279 | 3.134078212 |
| ENSG00000166800 | LDHAL6A  | 0.491803279 | 3.134078212 |
| ENSG00000166848 | TERF2IP  | 0.491803279 | 3.134078212 |
| ENSG00000166881 | TMEM194A | 0.491803279 | 3.134078212 |
| ENSG00000166887 | VPS39    | 0.491803279 | 3.134078212 |
| ENSG00000166889 | PATL1    | 0.491803279 | 3.134078212 |

|                 |          |             |             |
|-----------------|----------|-------------|-------------|
| ENSG00000166912 | MTMR10   | 0.491803279 | 3.134078212 |
| ENSG00000166927 | MS4A7    | 0.491803279 | 3.134078212 |
| ENSG00000166948 | TGM6     | 0.491803279 | 3.134078212 |
| ENSG00000166965 | RCCD1    | 0.491803279 | 3.134078212 |
| ENSG00000167098 | SUN5     | 0.491803279 | 3.134078212 |
| ENSG00000167103 | PIP5KL1  | 0.491803279 | 3.134078212 |
| ENSG00000167186 | COQ7     | 0.491803279 | 3.134078212 |
| ENSG00000167191 | GPRC5B   | 0.491803279 | 3.134078212 |
| ENSG00000167194 | C16orf92 | 0.491803279 | 3.134078212 |
| ENSG00000167220 | HDHD2    | 0.491803279 | 3.134078212 |
| ENSG00000167244 | IGF2     | 0.491803279 | 3.134078212 |
| ENSG00000167333 | TRIM68   | 0.491803279 | 3.134078212 |
| ENSG00000167371 | PRRT2    | 0.491803279 | 3.134078212 |
| ENSG00000167394 | ZNF668   | 0.491803279 | 3.134078212 |
| ENSG00000167476 | JSRP1    | 0.491803279 | 3.134078212 |
| ENSG00000167515 | TRAPPC2L | 0.491803279 | 3.134078212 |
| ENSG00000167554 | ZNF610   | 0.491803279 | 3.134078212 |
| ENSG00000167608 | TMC4     | 0.491803279 | 3.134078212 |
| ENSG00000167674 | HDGFRP2  | 0.491803279 | 3.134078212 |
| ENSG00000167693 | NXN      | 0.491803279 | 3.134078212 |
| ENSG00000167705 | RILP     | 0.491803279 | 3.134078212 |
| ENSG00000167772 | ANGPTL4  | 0.491803279 | 3.134078212 |
| ENSG00000167791 | CABP2    | 0.491803279 | 3.134078212 |
| ENSG00000167815 | PRDX2    | 0.491803279 | 3.134078212 |
| ENSG00000167822 | OR8J3    | 0.491803279 | 3.134078212 |
| ENSG00000167861 | HID1     | 0.491803279 | 3.134078212 |
| ENSG00000167914 | GSDMA    | 0.491803279 | 3.134078212 |
| ENSG00000167962 | ZNF598   | 0.491803279 | 3.134078212 |
| ENSG00000167964 | RAB26    | 0.491803279 | 3.134078212 |
| ENSG00000167977 | KCTD5    | 0.491803279 | 3.134078212 |
| ENSG00000167987 | VPS37C   | 0.491803279 | 3.134078212 |
| ENSG00000167992 | VWCE     | 0.491803279 | 3.134078212 |
| ENSG00000167995 | BEST1    | 0.491803279 | 3.134078212 |
| ENSG00000168005 | C11orf84 | 0.491803279 | 3.134078212 |
| ENSG00000168016 | TRANK1   | 0.491803279 | 3.134078212 |
| ENSG00000168056 | LTBP3    | 0.491803279 | 3.134078212 |
| ENSG00000168062 | BATF2    | 0.491803279 | 3.134078212 |
| ENSG00000168067 | MAP4K2   | 0.491803279 | 3.134078212 |
| ENSG00000168079 | SCARA5   | 0.491803279 | 3.134078212 |
| ENSG00000168101 | NUDT16L1 | 0.491803279 | 3.134078212 |
| ENSG00000168116 | KIAA1586 | 0.491803279 | 3.134078212 |
| ENSG00000168140 | VASN     | 0.491803279 | 3.134078212 |
| ENSG00000168291 | PDHB     | 0.491803279 | 3.134078212 |
| ENSG00000168306 | ACOX2    | 0.491803279 | 3.134078212 |
| ENSG00000168333 | C8orf22  | 0.491803279 | 3.134078212 |
| ENSG00000168350 | DEGS2    | 0.491803279 | 3.134078212 |
| ENSG00000168411 | RFWD3    | 0.491803279 | 3.134078212 |

|                 |         |             |             |
|-----------------|---------|-------------|-------------|
| ENSG00000168453 | HR      | 0.491803279 | 3.134078212 |
| ENSG00000168481 | LGI3    | 0.491803279 | 3.134078212 |
| ENSG00000168589 | DYNLRB2 | 0.491803279 | 3.134078212 |
| ENSG00000168610 | STAT3   | 0.491803279 | 3.134078212 |
| ENSG00000168615 | ADAM9   | 0.491803279 | 3.134078212 |
| ENSG00000168671 | UGT3A2  | 0.491803279 | 3.134078212 |
| ENSG00000168679 | SLC16A4 | 0.491803279 | 3.134078212 |
| ENSG00000168875 | SOX14   | 0.491803279 | 3.134078212 |
| ENSG00000168884 | TNIP2   | 0.491803279 | 3.134078212 |
| ENSG00000168918 | INPP5D  | 0.491803279 | 3.134078212 |
| ENSG00000168936 | TMEM129 | 0.491803279 | 3.134078212 |
| ENSG00000169045 | HNRNPH1 | 0.491803279 | 3.134078212 |
| ENSG00000169291 | SHE     | 0.491803279 | 3.134078212 |
| ENSG00000169299 | PGM2    | 0.491803279 | 3.134078212 |
| ENSG00000169347 | GP2     | 0.491803279 | 3.134078212 |
| ENSG00000169375 | SIN3A   | 0.491803279 | 3.134078212 |
| ENSG00000169397 | RNASE3  | 0.491803279 | 3.134078212 |
| ENSG00000169403 | PTAFR   | 0.491803279 | 3.134078212 |
| ENSG00000169435 | RASSF6  | 0.491803279 | 3.134078212 |
| ENSG00000169490 | TM2D2   | 0.491803279 | 3.134078212 |
| ENSG00000169495 | HTRA4   | 0.491803279 | 3.134078212 |
| ENSG00000169499 | PLEKHA2 | 0.491803279 | 3.134078212 |
| ENSG00000169509 | CRCT1   | 0.491803279 | 3.134078212 |
| ENSG00000169548 | ZNF280A | 0.491803279 | 3.134078212 |
| ENSG00000169554 | ZEB2    | 0.491803279 | 3.134078212 |
| ENSG00000169592 | INO80E  | 0.491803279 | 3.134078212 |
| ENSG00000169688 | MT1B    | 0.491803279 | 3.134078212 |
| ENSG00000169689 | STRA13  | 0.491803279 | 3.134078212 |
| ENSG00000169727 | GPS1    | 0.491803279 | 3.134078212 |
| ENSG00000169756 | LIMS1   | 0.491803279 | 3.134078212 |
| ENSG00000169856 | ONECUT1 | 0.491803279 | 3.134078212 |
| ENSG00000169862 | CTNND2  | 0.491803279 | 3.134078212 |
| ENSG00000169871 | TRIM56  | 0.491803279 | 3.134078212 |
| ENSG00000169891 | REPS2   | 0.491803279 | 3.134078212 |
| ENSG00000169894 | MUC3A   | 0.491803279 | 3.134078212 |
| ENSG00000169964 | TMEM42  | 0.491803279 | 3.134078212 |
| ENSG00000169972 | PUSL1   | 0.491803279 | 3.134078212 |
| ENSG00000169991 | IFFO2   | 0.491803279 | 3.134078212 |
| ENSG00000170006 | TMEM154 | 0.491803279 | 3.134078212 |
| ENSG00000170044 | ZPLD1   | 0.491803279 | 3.134078212 |
| ENSG00000170074 | FAM153A | 0.491803279 | 3.134078212 |
| ENSG00000170085 | SIMC1   | 0.491803279 | 3.134078212 |
| ENSG00000170100 | ZNF778  | 0.491803279 | 3.134078212 |
| ENSG00000170255 | MRGPRX1 | 0.491803279 | 3.134078212 |
| ENSG00000170260 | ZNF212  | 0.491803279 | 3.134078212 |
| ENSG00000170364 | SETMAR  | 0.491803279 | 3.134078212 |
| ENSG00000170464 | DNAJC18 | 0.491803279 | 3.134078212 |

|                 |          |             |             |
|-----------------|----------|-------------|-------------|
| ENSG00000170523 | KRT83    | 0.491803279 | 3.134078212 |
| ENSG00000170606 | HSPA4    | 0.491803279 | 3.134078212 |
| ENSG00000170681 | MURC     | 0.491803279 | 3.134078212 |
| ENSG00000170790 | OR10A2   | 0.491803279 | 3.134078212 |
| ENSG00000170801 | HTRA3    | 0.491803279 | 3.134078212 |
| ENSG00000170803 | OR2AG1   | 0.491803279 | 3.134078212 |
| ENSG00000170871 | KIAA0232 | 0.491803279 | 3.134078212 |
| ENSG00000170892 | TSEN34   | 0.491803279 | 3.134078212 |
| ENSG00000170950 | PGK2     | 0.491803279 | 3.134078212 |
| ENSG00000171049 | FPR2     | 0.491803279 | 3.134078212 |
| ENSG00000171054 | OR13H1   | 0.491803279 | 3.134078212 |
| ENSG00000171097 | CCBL1    | 0.491803279 | 3.134078212 |
| ENSG00000171109 | MFN1     | 0.491803279 | 3.134078212 |
| ENSG00000171161 | ZNF672   | 0.491803279 | 3.134078212 |
| ENSG00000171208 | NETO2    | 0.491803279 | 3.134078212 |
| ENSG00000171224 | C10orf35 | 0.491803279 | 3.134078212 |
| ENSG00000171236 | LRG1     | 0.491803279 | 3.134078212 |
| ENSG00000171310 | CHST11   | 0.491803279 | 3.134078212 |
| ENSG00000171311 | EXOSC1   | 0.491803279 | 3.134078212 |
| ENSG00000171443 | ZNF524   | 0.491803279 | 3.134078212 |
| ENSG00000171466 | ZNF562   | 0.491803279 | 3.134078212 |
| ENSG00000171488 | LRR8C    | 0.491803279 | 3.134078212 |
| ENSG00000171490 | RSL1D1   | 0.491803279 | 3.134078212 |
| ENSG00000171606 | ZNF274   | 0.491803279 | 3.134078212 |
| ENSG00000171724 | VAT1L    | 0.491803279 | 3.134078212 |
| ENSG00000171813 | PWWP2B   | 0.491803279 | 3.134078212 |
| ENSG00000171855 | IFNB1    | 0.491803279 | 3.134078212 |
| ENSG00000171867 | PRNP     | 0.491803279 | 3.134078212 |
| ENSG00000171877 | FRMD5    | 0.491803279 | 3.134078212 |
| ENSG00000172086 | KRCC1    | 0.491803279 | 3.134078212 |
| ENSG00000172123 | SLFN12   | 0.491803279 | 3.134078212 |
| ENSG00000172172 | MRPL13   | 0.491803279 | 3.134078212 |
| ENSG00000172197 | MBOAT1   | 0.491803279 | 3.134078212 |
| ENSG00000172208 | OR4X2    | 0.491803279 | 3.134078212 |
| ENSG00000172209 | GPR22    | 0.491803279 | 3.134078212 |
| ENSG00000172216 | CEBPB    | 0.491803279 | 3.134078212 |
| ENSG00000172238 | ATOH1    | 0.491803279 | 3.134078212 |
| ENSG00000172247 | C1QTNF4  | 0.491803279 | 3.134078212 |
| ENSG00000172264 | MACROD2  | 0.491803279 | 3.134078212 |
| ENSG00000172315 | TP53RK   | 0.491803279 | 3.134078212 |
| ENSG00000172324 | OR5A2    | 0.491803279 | 3.134078212 |
| ENSG00000172348 | RCAN2    | 0.491803279 | 3.134078212 |
| ENSG00000172399 | MYOZ2    | 0.491803279 | 3.134078212 |
| ENSG00000172409 | CLP1     | 0.491803279 | 3.134078212 |
| ENSG00000172458 | IL17D    | 0.491803279 | 3.134078212 |
| ENSG00000172461 | FUT9     | 0.491803279 | 3.134078212 |
| ENSG00000172534 | HCFC1    | 0.491803279 | 3.134078212 |

|                 |              |             |             |
|-----------------|--------------|-------------|-------------|
| ENSG00000172572 | PDE3A        | 0.491803279 | 3.134078212 |
| ENSG00000172575 | RASGRP1      | 0.491803279 | 3.134078212 |
| ENSG00000172640 | OR10AD1      | 0.491803279 | 3.134078212 |
| ENSG00000172731 | LRRC20       | 0.491803279 | 3.134078212 |
| ENSG00000172732 | MUS81        | 0.491803279 | 3.134078212 |
| ENSG00000172742 | OR4D9        | 0.491803279 | 3.134078212 |
| ENSG00000172782 | FADS6        | 0.491803279 | 3.134078212 |
| ENSG00000172817 | CYP7B1       | 0.491803279 | 3.134078212 |
| ENSG00000172830 | SSH3         | 0.491803279 | 3.134078212 |
| ENSG00000172840 | PDP2         | 0.491803279 | 3.134078212 |
| ENSG00000172867 | KRT2         | 0.491803279 | 3.134078212 |
| ENSG00000172893 | DHCR7        | 0.491803279 | 3.134078212 |
| ENSG00000172935 | MRGPRF       | 0.491803279 | 3.134078212 |
| ENSG00000172939 | OXR1         | 0.491803279 | 3.134078212 |
| ENSG00000172955 | ADH6         | 0.491803279 | 3.134078212 |
| ENSG00000172967 | XKR3         | 0.491803279 | 3.134078212 |
| ENSG00000173020 | ADRBK1       | 0.491803279 | 3.134078212 |
| ENSG00000173137 | ADCK5        | 0.491803279 | 3.134078212 |
| ENSG00000173145 | NOC3L        | 0.491803279 | 3.134078212 |
| ENSG00000173208 | ABCD2        | 0.491803279 | 3.134078212 |
| ENSG00000173302 | GPR148       | 0.491803279 | 3.134078212 |
| ENSG00000173404 | INSM1        | 0.491803279 | 3.134078212 |
| ENSG00000173464 | RNASE11      | 0.491803279 | 3.134078212 |
| ENSG00000173557 | C2orf70      | 0.491803279 | 3.134078212 |
| ENSG00000173578 | XCR1         | 0.491803279 | 3.134078212 |
| ENSG00000173599 | PC           | 0.491803279 | 3.134078212 |
| ENSG00000173621 | LRFN4        | 0.491803279 | 3.134078212 |
| ENSG00000173714 | WFIKKN2      | 0.491803279 | 3.134078212 |
| ENSG00000173862 | RP11-89N17.1 | 0.491803279 | 3.134078212 |
| ENSG00000174032 | SLC25A30     | 0.491803279 | 3.134078212 |
| ENSG00000174080 | CTSF         | 0.491803279 | 3.134078212 |
| ENSG00000174255 | ZNF80        | 0.491803279 | 3.134078212 |
| ENSG00000174276 | ZNHIT2       | 0.491803279 | 3.134078212 |
| ENSG00000174332 | GLIS1        | 0.491803279 | 3.134078212 |
| ENSG00000174437 | ATP2A2       | 0.491803279 | 3.134078212 |
| ENSG00000174453 | VWC2L        | 0.491803279 | 3.134078212 |
| ENSG00000174595 | KLF14        | 0.491803279 | 3.134078212 |
| ENSG00000174599 | TRAM1L1      | 0.491803279 | 3.134078212 |
| ENSG00000174628 | IQCK         | 0.491803279 | 3.134078212 |
| ENSG00000174672 | BRSK2        | 0.491803279 | 3.134078212 |
| ENSG00000174775 | HRAS         | 0.491803279 | 3.134078212 |
| ENSG00000174796 | THAP6        | 0.491803279 | 3.134078212 |
| ENSG00000174885 | NLRP6        | 0.491803279 | 3.134078212 |
| ENSG00000174914 | OR9G1        | 0.491803279 | 3.134078212 |
| ENSG00000174953 | DHX36        | 0.491803279 | 3.134078212 |
| ENSG00000175018 | TEX36        | 0.491803279 | 3.134078212 |
| ENSG00000175063 | UBE2C        | 0.491803279 | 3.134078212 |

|                 |          |             |             |
|-----------------|----------|-------------|-------------|
| ENSG00000175077 | RTP1     | 0.491803279 | 3.134078212 |
| ENSG00000175110 | MRPS22   | 0.491803279 | 3.134078212 |
| ENSG00000175166 | PSMD2    | 0.491803279 | 3.134078212 |
| ENSG00000175182 | FAM131A  | 0.491803279 | 3.134078212 |
| ENSG00000175203 | DCTN2    | 0.491803279 | 3.134078212 |
| ENSG00000175294 | CATSPER1 | 0.491803279 | 3.134078212 |
| ENSG00000175344 | CHRNA7   | 0.491803279 | 3.134078212 |
| ENSG00000175489 | LRRC25   | 0.491803279 | 3.134078212 |
| ENSG00000175520 | UBQLN3   | 0.491803279 | 3.134078212 |
| ENSG00000175544 | CABP4    | 0.491803279 | 3.134078212 |
| ENSG00000175575 | PAAF1    | 0.491803279 | 3.134078212 |
| ENSG00000175581 | MRPL48   | 0.491803279 | 3.134078212 |
| ENSG00000175643 | RMI2     | 0.491803279 | 3.134078212 |
| ENSG00000175707 | C1orf172 | 0.491803279 | 3.134078212 |
| ENSG00000175727 | MLXIP    | 0.491803279 | 3.134078212 |
| ENSG00000175746 | C15orf54 | 0.491803279 | 3.134078212 |
| ENSG00000175809 | ZNF645   | 0.491803279 | 3.134078212 |
| ENSG00000175877 | WBSCR28  | 0.491803279 | 3.134078212 |
| ENSG00000175894 | TSPEAR   | 0.491803279 | 3.134078212 |
| ENSG00000176009 | ASCL3    | 0.491803279 | 3.134078212 |
| ENSG00000176125 | UFSP1    | 0.491803279 | 3.134078212 |
| ENSG00000176155 | CCDC57   | 0.491803279 | 3.134078212 |
| ENSG00000176219 | OR11H6   | 0.491803279 | 3.134078212 |
| ENSG00000176273 | SLC35G1  | 0.491803279 | 3.134078212 |
| ENSG00000176274 | SLC25A53 | 0.491803279 | 3.134078212 |
| ENSG00000176387 | HSD11B2  | 0.491803279 | 3.134078212 |
| ENSG00000176435 | CLEC14A  | 0.491803279 | 3.134078212 |
| ENSG00000176444 | CLK2     | 0.491803279 | 3.134078212 |
| ENSG00000176540 | OR4C5    | 0.491803279 | 3.134078212 |
| ENSG00000176678 | FOXL1    | 0.491803279 | 3.134078212 |
| ENSG00000176714 | CCDC121  | 0.491803279 | 3.134078212 |
| ENSG00000176720 | BOK      | 0.491803279 | 3.134078212 |
| ENSG00000176787 | OR52E2   | 0.491803279 | 3.134078212 |
| ENSG00000176853 | FAM91A1  | 0.491803279 | 3.134078212 |
| ENSG00000176884 | GRIN1    | 0.491803279 | 3.134078212 |
| ENSG00000176890 | TYMS     | 0.491803279 | 3.134078212 |
| ENSG00000176896 | TCEANC   | 0.491803279 | 3.134078212 |
| ENSG00000176903 | PNMA1    | 0.491803279 | 3.134078212 |
| ENSG00000176909 | MAMSTR   | 0.491803279 | 3.134078212 |
| ENSG00000176919 | C8G      | 0.491803279 | 3.134078212 |
| ENSG00000176922 | OR51S1   | 0.491803279 | 3.134078212 |
| ENSG00000176986 | SEC24C   | 0.491803279 | 3.134078212 |
| ENSG00000177045 | SIX5     | 0.491803279 | 3.134078212 |
| ENSG00000177051 | FBXO46   | 0.491803279 | 3.134078212 |
| ENSG00000177106 | EPS8L2   | 0.491803279 | 3.134078212 |
| ENSG00000177335 | C8orf31  | 0.491803279 | 3.134078212 |
| ENSG00000177370 | TIMM22   | 0.491803279 | 3.134078212 |

|                 |          |             |             |
|-----------------|----------|-------------|-------------|
| ENSG00000177455 | CD19     | 0.491803279 | 3.134078212 |
| ENSG00000177468 | OLIG3    | 0.491803279 | 3.134078212 |
| ENSG00000177494 | ZBED2    | 0.491803279 | 3.134078212 |
| ENSG00000177558 | FAM187B  | 0.491803279 | 3.134078212 |
| ENSG00000177689 | MAGEB10  | 0.491803279 | 3.134078212 |
| ENSG00000177692 | DNAJC28  | 0.491803279 | 3.134078212 |
| ENSG00000177728 | KIAA0195 | 0.491803279 | 3.134078212 |
| ENSG00000177764 | ZCCHC3   | 0.491803279 | 3.134078212 |
| ENSG00000177854 | TMEM187  | 0.491803279 | 3.134078212 |
| ENSG00000177888 | ZBTB41   | 0.491803279 | 3.134078212 |
| ENSG00000177947 | ODF3     | 0.491803279 | 3.134078212 |
| ENSG00000178028 | DMAP1    | 0.491803279 | 3.134078212 |
| ENSG00000178105 | DDX10    | 0.491803279 | 3.134078212 |
| ENSG00000178127 | NDUFV2   | 0.491803279 | 3.134078212 |
| ENSG00000178175 | ZNF366   | 0.491803279 | 3.134078212 |
| ENSG00000178199 | ZC3H12D  | 0.491803279 | 3.134078212 |
| ENSG00000178226 | PRSS36   | 0.491803279 | 3.134078212 |
| ENSG00000178229 | ZNF543   | 0.491803279 | 3.134078212 |
| ENSG00000178257 | PRM3     | 0.491803279 | 3.134078212 |
| ENSG00000178381 | ZFAND2A  | 0.491803279 | 3.134078212 |
| ENSG00000178401 | DNAJC22  | 0.491803279 | 3.134078212 |
| ENSG00000178425 | NT5DC1   | 0.491803279 | 3.134078212 |
| ENSG00000178445 | GLDC     | 0.491803279 | 3.134078212 |
| ENSG00000178567 | EPM2AIP1 | 0.491803279 | 3.134078212 |
| ENSG00000178690 | DYNAP    | 0.491803279 | 3.134078212 |
| ENSG00000178695 | KCTD12   | 0.491803279 | 3.134078212 |
| ENSG00000178722 | C5orf64  | 0.491803279 | 3.134078212 |
| ENSG00000178764 | ZHX2     | 0.491803279 | 3.134078212 |
| ENSG00000178852 | EFCAB13  | 0.491803279 | 3.134078212 |
| ENSG00000178896 | EXOSC4   | 0.491803279 | 3.134078212 |
| ENSG00000178919 | FOXE1    | 0.491803279 | 3.134078212 |
| ENSG00000178952 | TUFM     | 0.491803279 | 3.134078212 |
| ENSG00000179134 | SAMD4B   | 0.491803279 | 3.134078212 |
| ENSG00000179218 | CALR     | 0.491803279 | 3.134078212 |
| ENSG00000179222 | MAGED1   | 0.491803279 | 3.134078212 |
| ENSG00000179292 | TMEM151A | 0.491803279 | 3.134078212 |
| ENSG00000179294 | C17orf96 | 0.491803279 | 3.134078212 |
| ENSG00000179399 | GPC5     | 0.491803279 | 3.134078212 |
| ENSG00000179528 | LBX2     | 0.491803279 | 3.134078212 |
| ENSG00000179603 | GRM8     | 0.491803279 | 3.134078212 |
| ENSG00000179626 | OR6C4    | 0.491803279 | 3.134078212 |
| ENSG00000179750 | APOBEC3B | 0.491803279 | 3.134078212 |
| ENSG00000179751 | SYCN     | 0.491803279 | 3.134078212 |
| ENSG00000179837 | RBM15B   | 0.491803279 | 3.134078212 |
| ENSG00000179918 | SEPHS2   | 0.491803279 | 3.134078212 |
| ENSG00000179919 | OR10A7   | 0.491803279 | 3.134078212 |
| ENSG00000180011 | ZADH2    | 0.491803279 | 3.134078212 |

|                 |          |             |             |
|-----------------|----------|-------------|-------------|
| ENSG00000180138 | CSNK1A1L | 0.491803279 | 3.134078212 |
| ENSG00000180155 | LYNX1    | 0.491803279 | 3.134078212 |
| ENSG00000180190 | TDRP     | 0.491803279 | 3.134078212 |
| ENSG00000180257 | ZNF816   | 0.491803279 | 3.134078212 |
| ENSG00000180433 | OR6K6    | 0.491803279 | 3.134078212 |
| ENSG00000180447 | GAS1     | 0.491803279 | 3.134078212 |
| ENSG00000180481 | GLIPR1L2 | 0.491803279 | 3.134078212 |
| ENSG00000180638 | SLC47A2  | 0.491803279 | 3.134078212 |
| ENSG00000180667 | YOD1     | 0.491803279 | 3.134078212 |
| ENSG00000180785 | OR51E1   | 0.491803279 | 3.134078212 |
| ENSG00000180861 | C12orf36 | 0.491803279 | 3.134078212 |
| ENSG00000180921 | FAM83H   | 0.491803279 | 3.134078212 |
| ENSG00000180934 | OR56A1   | 0.491803279 | 3.134078212 |
| ENSG00000180938 | ZNF572   | 0.491803279 | 3.134078212 |
| ENSG00000180974 | OR52E4   | 0.491803279 | 3.134078212 |
| ENSG00000181013 | C17orf47 | 0.491803279 | 3.134078212 |
| ENSG00000181023 | OR56B1   | 0.491803279 | 3.134078212 |
| ENSG00000181038 | METTL23  | 0.491803279 | 3.134078212 |
| ENSG00000181092 | ADIPOQ   | 0.491803279 | 3.134078212 |
| ENSG00000181135 | ZNF707   | 0.491803279 | 3.134078212 |
| ENSG00000181220 | ZNF746   | 0.491803279 | 3.134078212 |
| ENSG00000181273 | OR5AK2   | 0.491803279 | 3.134078212 |
| ENSG00000181433 | SAGE1    | 0.491803279 | 3.134078212 |
| ENSG00000181518 | OR8D4    | 0.491803279 | 3.134078212 |
| ENSG00000181523 | SGSH     | 0.491803279 | 3.134078212 |
| ENSG00000181541 | MAB21L2  | 0.491803279 | 3.134078212 |
| ENSG00000181619 | GPR135   | 0.491803279 | 3.134078212 |
| ENSG00000181656 | GPR88    | 0.491803279 | 3.134078212 |
| ENSG00000181847 | TIGIT    | 0.491803279 | 3.134078212 |
| ENSG00000181896 | ZNF101   | 0.491803279 | 3.134078212 |
| ENSG00000181903 | OR4C6    | 0.491803279 | 3.134078212 |
| ENSG00000181915 | ADO      | 0.491803279 | 3.134078212 |
| ENSG00000181958 | OR4A15   | 0.491803279 | 3.134078212 |
| ENSG00000182022 | CHST15   | 0.491803279 | 3.134078212 |
| ENSG00000182040 | USH1G    | 0.491803279 | 3.134078212 |
| ENSG00000182070 | OR52A1   | 0.491803279 | 3.134078212 |
| ENSG00000182087 | TMEM259  | 0.491803279 | 3.134078212 |
| ENSG00000182118 | FAM89A   | 0.491803279 | 3.134078212 |
| ENSG00000182134 | TDRKH    | 0.491803279 | 3.134078212 |
| ENSG00000182141 | ZNF708   | 0.491803279 | 3.134078212 |
| ENSG00000182196 | ARL6IP4  | 0.491803279 | 3.134078212 |
| ENSG00000182263 | FIGN     | 0.491803279 | 3.134078212 |
| ENSG00000182264 | IZUMO1   | 0.491803279 | 3.134078212 |
| ENSG00000182372 | CLN8     | 0.491803279 | 3.134078212 |
| ENSG00000182472 | CAPN12   | 0.491803279 | 3.134078212 |
| ENSG00000182566 | CLEC4G   | 0.491803279 | 3.134078212 |
| ENSG00000182601 | HS3ST4   | 0.491803279 | 3.134078212 |

|                 |            |             |             |
|-----------------|------------|-------------|-------------|
| ENSG00000182674 | KCNB2      | 0.491803279 | 3.134078212 |
| ENSG00000182732 | RGS6       | 0.491803279 | 3.134078212 |
| ENSG00000182759 | MAFA       | 0.491803279 | 3.134078212 |
| ENSG00000182768 | NGRN       | 0.491803279 | 3.134078212 |
| ENSG00000182901 | RGS7       | 0.491803279 | 3.134078212 |
| ENSG00000182919 | C11orf54   | 0.491803279 | 3.134078212 |
| ENSG00000182973 | CNOT10     | 0.491803279 | 3.134078212 |
| ENSG00000183060 | LYSMD4     | 0.491803279 | 3.134078212 |
| ENSG00000183476 | SH2D7      | 0.491803279 | 3.134078212 |
| ENSG00000183605 | SFXN4      | 0.491803279 | 3.134078212 |
| ENSG00000183624 | HMCES      | 0.491803279 | 3.134078212 |
| ENSG00000183648 | NDUFB1     | 0.491803279 | 3.134078212 |
| ENSG00000183668 | PSG9       | 0.491803279 | 3.134078212 |
| ENSG00000183684 | ALYREF     | 0.491803279 | 3.134078212 |
| ENSG00000183747 | ACSM2A     | 0.491803279 | 3.134078212 |
| ENSG00000183763 | TRAIP      | 0.491803279 | 3.134078212 |
| ENSG00000183801 | OLFML1     | 0.491803279 | 3.134078212 |
| ENSG00000183891 | TTC32      | 0.491803279 | 3.134078212 |
| ENSG00000183977 | PP2D1      | 0.491803279 | 3.134078212 |
| ENSG00000183978 | COA3       | 0.491803279 | 3.134078212 |
| ENSG00000184005 | ST6GALNAC3 | 0.491803279 | 3.134078212 |
| ENSG00000184029 | DSCR4      | 0.491803279 | 3.134078212 |
| ENSG00000184047 | DIABLO     | 0.491803279 | 3.134078212 |
| ENSG00000184056 | VPS33B     | 0.491803279 | 3.134078212 |
| ENSG00000184156 | KCNQ3      | 0.491803279 | 3.134078212 |
| ENSG00000184207 | PGP        | 0.491803279 | 3.134078212 |
| ENSG00000184292 | TACSTD2    | 0.491803279 | 3.134078212 |
| ENSG00000184350 | MRGPRE     | 0.491803279 | 3.134078212 |
| ENSG00000184363 | PKP3       | 0.491803279 | 3.134078212 |
| ENSG00000184432 | COPB2      | 0.491803279 | 3.134078212 |
| ENSG00000184564 | SLITRK6    | 0.491803279 | 3.134078212 |
| ENSG00000184599 | FAM19A3    | 0.491803279 | 3.134078212 |
| ENSG00000184634 | MED12      | 0.491803279 | 3.134078212 |
| ENSG00000184635 | ZNF93      | 0.491803279 | 3.134078212 |
| ENSG00000184647 | PRSS55     | 0.491803279 | 3.134078212 |
| ENSG00000184650 | ODF4       | 0.491803279 | 3.134078212 |
| ENSG00000184675 | AMER1      | 0.491803279 | 3.134078212 |
| ENSG00000184788 | SATL1      | 0.491803279 | 3.134078212 |
| ENSG00000184831 | APOO       | 0.491803279 | 3.134078212 |
| ENSG00000184867 | ARMCX2     | 0.491803279 | 3.134078212 |
| ENSG00000184916 | JAG2       | 0.491803279 | 3.134078212 |
| ENSG00000184988 | TMEM106A   | 0.491803279 | 3.134078212 |
| ENSG00000184999 | SLC22A10   | 0.491803279 | 3.134078212 |
| ENSG00000185028 | LRRC14B    | 0.491803279 | 3.134078212 |
| ENSG00000185101 | ANO9       | 0.491803279 | 3.134078212 |
| ENSG00000185127 | C6orf120   | 0.491803279 | 3.134078212 |
| ENSG00000185149 | NPY2R      | 0.491803279 | 3.134078212 |

|                 |          |             |             |
|-----------------|----------|-------------|-------------|
| ENSG00000185163 | DDX51    | 0.491803279 | 3.134078212 |
| ENSG00000185189 | NRBP2    | 0.491803279 | 3.134078212 |
| ENSG00000185215 | TNFAIP2  | 0.491803279 | 3.134078212 |
| ENSG00000185236 | RAB11B   | 0.491803279 | 3.134078212 |
| ENSG00000185238 | PRMT3    | 0.491803279 | 3.134078212 |
| ENSG00000185252 | ZNF74    | 0.491803279 | 3.134078212 |
| ENSG00000185264 | TEX33    | 0.491803279 | 3.134078212 |
| ENSG00000185385 | OR7A17   | 0.491803279 | 3.134078212 |
| ENSG00000185436 | IFNLR1   | 0.491803279 | 3.134078212 |
| ENSG00000185507 | IRF7     | 0.491803279 | 3.134078212 |
| ENSG00000185532 | PRKG1    | 0.491803279 | 3.134078212 |
| ENSG00000185594 | SPATA8   | 0.491803279 | 3.134078212 |
| ENSG00000185608 | MRPL40   | 0.491803279 | 3.134078212 |
| ENSG00000185619 | PCGF3    | 0.491803279 | 3.134078212 |
| ENSG00000185624 | P4HB     | 0.491803279 | 3.134078212 |
| ENSG00000185634 | SHC4     | 0.491803279 | 3.134078212 |
| ENSG00000185652 | NTF3     | 0.491803279 | 3.134078212 |
| ENSG00000185668 | POU3F1   | 0.491803279 | 3.134078212 |
| ENSG00000185686 | PRAME    | 0.491803279 | 3.134078212 |
| ENSG00000185689 | C6orf201 | 0.491803279 | 3.134078212 |
| ENSG00000185730 | ZNF696   | 0.491803279 | 3.134078212 |
| ENSG00000185905 | C16orf54 | 0.491803279 | 3.134078212 |
| ENSG00000185924 | RTN4RL1  | 0.491803279 | 3.134078212 |
| ENSG00000185926 | OR4C46   | 0.491803279 | 3.134078212 |
| ENSG00000185946 | RNPC3    | 0.491803279 | 3.134078212 |
| ENSG00000185955 | C7orf61  | 0.491803279 | 3.134078212 |
| ENSG00000185985 | SLITRK2  | 0.491803279 | 3.134078212 |
| ENSG00000185988 | PLK5     | 0.491803279 | 3.134078212 |
| ENSG00000186001 | LRCH3    | 0.491803279 | 3.134078212 |
| ENSG00000186020 | ZNF529   | 0.491803279 | 3.134078212 |
| ENSG00000186047 | DLEU7    | 0.491803279 | 3.134078212 |
| ENSG00000186088 | GSAP     | 0.491803279 | 3.134078212 |
| ENSG00000186198 | SLC51B   | 0.491803279 | 3.134078212 |
| ENSG00000186272 | ZNF17    | 0.491803279 | 3.134078212 |
| ENSG00000186306 | OR10T2   | 0.491803279 | 3.134078212 |
| ENSG00000186310 | NAP1L3   | 0.491803279 | 3.134078212 |
| ENSG00000186377 | CYP4X1   | 0.491803279 | 3.134078212 |
| ENSG00000186395 | KRT10    | 0.491803279 | 3.134078212 |
| ENSG00000186446 | ZNF501   | 0.491803279 | 3.134078212 |
| ENSG00000186474 | KLK12    | 0.491803279 | 3.134078212 |
| ENSG00000186529 | CYP4F3   | 0.491803279 | 3.134078212 |
| ENSG00000186564 | FOXD2    | 0.491803279 | 3.134078212 |
| ENSG00000186625 | KATNA1   | 0.491803279 | 3.134078212 |
| ENSG00000186648 | LRRC16B  | 0.491803279 | 3.134078212 |
| ENSG00000186710 | CCDC42B  | 0.491803279 | 3.134078212 |
| ENSG00000186716 | BCR      | 0.491803279 | 3.134078212 |
| ENSG00000186834 | HEXIM1   | 0.491803279 | 3.134078212 |

|                 |             |             |             |
|-----------------|-------------|-------------|-------------|
| ENSG00000186951 | PPARA       | 0.491803279 | 3.134078212 |
| ENSG00000187010 | RHD         | 0.491803279 | 3.134078212 |
| ENSG00000187068 | C3orf70     | 0.491803279 | 3.134078212 |
| ENSG00000187080 | OR2AK2      | 0.491803279 | 3.134078212 |
| ENSG00000187098 | MITF        | 0.491803279 | 3.134078212 |
| ENSG00000187122 | SLIT1       | 0.491803279 | 3.134078212 |
| ENSG00000187134 | AKR1C1      | 0.491803279 | 3.134078212 |
| ENSG00000187323 | DCC         | 0.491803279 | 3.134078212 |
| ENSG00000187372 | PCDHB13     | 0.491803279 | 3.134078212 |
| ENSG00000187535 | IFT140      | 0.491803279 | 3.134078212 |
| ENSG00000187553 | CYP26C1     | 0.491803279 | 3.134078212 |
| ENSG00000187555 | USP7        | 0.491803279 | 3.134078212 |
| ENSG00000187626 | ZKSCAN4     | 0.491803279 | 3.134078212 |
| ENSG00000187642 | C1orf170    | 0.491803279 | 3.134078212 |
| ENSG00000187672 | ERC2        | 0.491803279 | 3.134078212 |
| ENSG00000187676 | B3GALTL     | 0.491803279 | 3.134078212 |
| ENSG00000187688 | TRPV2       | 0.491803279 | 3.134078212 |
| ENSG00000187713 | TMEM203     | 0.491803279 | 3.134078212 |
| ENSG00000187736 | NHEJ1       | 0.491803279 | 3.134078212 |
| ENSG00000187747 | OR52B6      | 0.491803279 | 3.134078212 |
| ENSG00000187815 | ZFP69       | 0.491803279 | 3.134078212 |
| ENSG00000187867 | PALM3       | 0.491803279 | 3.134078212 |
| ENSG00000187905 | AC002472.13 | 0.491803279 | 3.134078212 |
| ENSG00000188033 | ZNF490      | 0.491803279 | 3.134078212 |
| ENSG00000188069 | OR51F1      | 0.491803279 | 3.134078212 |
| ENSG00000188153 | COL4A5      | 0.491803279 | 3.134078212 |
| ENSG00000188158 | NHS         | 0.491803279 | 3.134078212 |
| ENSG00000188263 | IL17REL     | 0.491803279 | 3.134078212 |
| ENSG00000188295 | ZNF669      | 0.491803279 | 3.134078212 |
| ENSG00000188305 | C19orf35    | 0.491803279 | 3.134078212 |
| ENSG00000188404 | SELL        | 0.491803279 | 3.134078212 |
| ENSG00000188483 | IER5L       | 0.491803279 | 3.134078212 |
| ENSG00000188505 | NCCRP1      | 0.491803279 | 3.134078212 |
| ENSG00000188558 | OR2G6       | 0.491803279 | 3.134078212 |
| ENSG00000188580 | NKAIN2      | 0.491803279 | 3.134078212 |
| ENSG00000188610 | FAM72B      | 0.491803279 | 3.134078212 |
| ENSG00000188629 | ZNF177      | 0.491803279 | 3.134078212 |
| ENSG00000188643 | S100A16     | 0.491803279 | 3.134078212 |
| ENSG00000188647 | PTAR1       | 0.491803279 | 3.134078212 |
| ENSG00000188659 | FAM154B     | 0.491803279 | 3.134078212 |
| ENSG00000188676 | IDO2        | 0.491803279 | 3.134078212 |
| ENSG00000188677 | PARVB       | 0.491803279 | 3.134078212 |
| ENSG00000188730 | VWC2        | 0.491803279 | 3.134078212 |
| ENSG00000188807 | TMEM201     | 0.491803279 | 3.134078212 |
| ENSG00000188820 | FAM26F      | 0.491803279 | 3.134078212 |
| ENSG00000188828 | GLRA4       | 0.491803279 | 3.134078212 |
| ENSG00000188833 | ENTPD8      | 0.491803279 | 3.134078212 |

|                 |           |             |             |
|-----------------|-----------|-------------|-------------|
| ENSG00000188848 | BEND4     | 0.491803279 | 3.134078212 |
| ENSG00000188869 | TMC3      | 0.491803279 | 3.134078212 |
| ENSG00000188877 | POTEA     | 0.491803279 | 3.134078212 |
| ENSG00000189057 | FAM111B   | 0.491803279 | 3.134078212 |
| ENSG00000189068 | VSTM1     | 0.491803279 | 3.134078212 |
| ENSG00000189079 | ARID2     | 0.491803279 | 3.134078212 |
| ENSG00000189091 | SF3B3     | 0.491803279 | 3.134078212 |
| ENSG00000189129 | PLAC9     | 0.491803279 | 3.134078212 |
| ENSG00000189181 | OR14I1    | 0.491803279 | 3.134078212 |
| ENSG00000189433 | GJB4      | 0.491803279 | 3.134078212 |
| ENSG00000196071 | OR2L13    | 0.491803279 | 3.134078212 |
| ENSG00000196091 | MYBPC1    | 0.491803279 | 3.134078212 |
| ENSG00000196104 | SPOCK3    | 0.491803279 | 3.134078212 |
| ENSG00000196151 | WDSUB1    | 0.491803279 | 3.134078212 |
| ENSG00000196154 | S100A4    | 0.491803279 | 3.134078212 |
| ENSG00000196171 | OR6K2     | 0.491803279 | 3.134078212 |
| ENSG00000196177 | ACADSB    | 0.491803279 | 3.134078212 |
| ENSG00000196184 | OR10J1    | 0.491803279 | 3.134078212 |
| ENSG00000196199 | MPHOSPH8  | 0.491803279 | 3.134078212 |
| ENSG00000196236 | XPNPEP3   | 0.491803279 | 3.134078212 |
| ENSG00000196313 | POM121    | 0.491803279 | 3.134078212 |
| ENSG00000196372 | ASB13     | 0.491803279 | 3.134078212 |
| ENSG00000196387 | ZNF140    | 0.491803279 | 3.134078212 |
| ENSG00000196396 | PTPN1     | 0.491803279 | 3.134078212 |
| ENSG00000196453 | ZNF777    | 0.491803279 | 3.134078212 |
| ENSG00000196502 | SULT1A1   | 0.491803279 | 3.134078212 |
| ENSG00000196544 | C17orf59  | 0.491803279 | 3.134078212 |
| ENSG00000196581 | AJAP1     | 0.491803279 | 3.134078212 |
| ENSG00000196588 | MKL1      | 0.491803279 | 3.134078212 |
| ENSG00000196605 | ZNF846    | 0.491803279 | 3.134078212 |
| ENSG00000196632 | WNK3      | 0.491803279 | 3.134078212 |
| ENSG00000196636 | ACN9      | 0.491803279 | 3.134078212 |
| ENSG00000196639 | HRH1      | 0.491803279 | 3.134078212 |
| ENSG00000196666 | FAM180B   | 0.491803279 | 3.134078212 |
| ENSG00000196811 | CHRNA     | 0.491803279 | 3.134078212 |
| ENSG00000197044 | ZNF441    | 0.491803279 | 3.134078212 |
| ENSG00000197093 | GAL3ST4   | 0.491803279 | 3.134078212 |
| ENSG00000197110 | IFNL3     | 0.491803279 | 3.134078212 |
| ENSG00000197162 | ZNF785    | 0.491803279 | 3.134078212 |
| ENSG00000197208 | SLC22A4   | 0.491803279 | 3.134078212 |
| ENSG00000197223 | C1D       | 0.491803279 | 3.134078212 |
| ENSG00000197261 | C6orf141  | 0.491803279 | 3.134078212 |
| ENSG00000197273 | GUCA2A    | 0.491803279 | 3.134078212 |
| ENSG00000197309 | OR10D3    | 0.491803279 | 3.134078212 |
| ENSG00000197322 | C17orf102 | 0.491803279 | 3.134078212 |
| ENSG00000197353 | LYPD2     | 0.491803279 | 3.134078212 |
| ENSG00000197428 | OR51D1    | 0.491803279 | 3.134078212 |

|                 |           |             |             |
|-----------------|-----------|-------------|-------------|
| ENSG00000197448 | GSTK1     | 0.491803279 | 3.134078212 |
| ENSG00000197451 | HNRNPAB   | 0.491803279 | 3.134078212 |
| ENSG00000197520 | FAM177B   | 0.491803279 | 3.134078212 |
| ENSG00000197566 | ZNF624    | 0.491803279 | 3.134078212 |
| ENSG00000197576 | HOXA4     | 0.491803279 | 3.134078212 |
| ENSG00000197587 | DMBX1     | 0.491803279 | 3.134078212 |
| ENSG00000197599 | CCDC154   | 0.491803279 | 3.134078212 |
| ENSG00000197635 | DPP4      | 0.491803279 | 3.134078212 |
| ENSG00000197641 | SERPINB13 | 0.491803279 | 3.134078212 |
| ENSG00000197705 | KLHL14    | 0.491803279 | 3.134078212 |
| ENSG00000197723 | HSPB9     | 0.491803279 | 3.134078212 |
| ENSG00000197774 | EME2      | 0.491803279 | 3.134078212 |
| ENSG00000197779 | ZNF81     | 0.491803279 | 3.134078212 |
| ENSG00000197782 | ZNF780A   | 0.491803279 | 3.134078212 |
| ENSG00000197849 | OR8G1     | 0.491803279 | 3.134078212 |
| ENSG00000197857 | ZNF44     | 0.491803279 | 3.134078212 |
| ENSG00000197891 | SLC22A12  | 0.491803279 | 3.134078212 |
| ENSG00000197953 | AADA2L2   | 0.491803279 | 3.134078212 |
| ENSG00000197958 | RPL12     | 0.491803279 | 3.134078212 |
| ENSG00000198019 | FCGR1B    | 0.491803279 | 3.134078212 |
| ENSG00000198055 | GRK6      | 0.491803279 | 3.134078212 |
| ENSG00000198077 | CYP2A7    | 0.491803279 | 3.134078212 |
| ENSG00000198087 | CD2AP     | 0.491803279 | 3.134078212 |
| ENSG00000198093 | ZNF649    | 0.491803279 | 3.134078212 |
| ENSG00000198104 | OR2T6     | 0.491803279 | 3.134078212 |
| ENSG00000198216 | CACNA1E   | 0.491803279 | 3.134078212 |
| ENSG00000198324 | FAM109A   | 0.491803279 | 3.134078212 |
| ENSG00000198346 | ZNF813    | 0.491803279 | 3.134078212 |
| ENSG00000198390 | KRTAP13-1 | 0.491803279 | 3.134078212 |
| ENSG00000198431 | TXNRD1    | 0.491803279 | 3.134078212 |
| ENSG00000198488 | B3GNT6    | 0.491803279 | 3.134078212 |
| ENSG00000198502 | HLA-DRB5  | 0.491803279 | 3.134078212 |
| ENSG00000198521 | ZNF43     | 0.491803279 | 3.134078212 |
| ENSG00000198535 | C2CD4A    | 0.491803279 | 3.134078212 |
| ENSG00000198538 | ZNF28     | 0.491803279 | 3.134078212 |
| ENSG00000198598 | MMP17     | 0.491803279 | 3.134078212 |
| ENSG00000198624 | CCDC69    | 0.491803279 | 3.134078212 |
| ENSG00000198663 | C6orf89   | 0.491803279 | 3.134078212 |
| ENSG00000198680 | TUSC1     | 0.491803279 | 3.134078212 |
| ENSG00000198681 | MAGEA1    | 0.491803279 | 3.134078212 |
| ENSG00000198740 | ZNF652    | 0.491803279 | 3.134078212 |
| ENSG00000198768 | APCDD1L   | 0.491803279 | 3.134078212 |
| ENSG00000198793 | MTOR      | 0.491803279 | 3.134078212 |
| ENSG00000198797 | BRINP2    | 0.491803279 | 3.134078212 |
| ENSG00000198807 | PAX9      | 0.491803279 | 3.134078212 |
| ENSG00000198822 | GRM3      | 0.491803279 | 3.134078212 |
| ENSG00000198832 | SELM      | 0.491803279 | 3.134078212 |

|                 |           |             |             |
|-----------------|-----------|-------------|-------------|
| ENSG00000198833 | UBE2J1    | 0.491803279 | 3.134078212 |
| ENSG00000198841 | KTI12     | 0.491803279 | 3.134078212 |
| ENSG00000198870 | C9orf96   | 0.491803279 | 3.134078212 |
| ENSG00000198885 | ITPRIPL1  | 0.491803279 | 3.134078212 |
| ENSG00000198890 | PRMT6     | 0.491803279 | 3.134078212 |
| ENSG00000198892 | SHISA4    | 0.491803279 | 3.134078212 |
| ENSG00000198917 | C9orf114  | 0.491803279 | 3.134078212 |
| ENSG00000198932 | GPRASP1   | 0.491803279 | 3.134078212 |
| ENSG00000198961 | PJA2      | 0.491803279 | 3.134078212 |
| ENSG00000198964 | SGMS1     | 0.491803279 | 3.134078212 |
| ENSG00000203666 | EFCAB2    | 0.491803279 | 3.134078212 |
| ENSG00000203710 | CR1       | 0.491803279 | 3.134078212 |
| ENSG00000203727 | SAMD5     | 0.491803279 | 3.134078212 |
| ENSG00000203782 | LOR       | 0.491803279 | 3.134078212 |
| ENSG00000203864 | C1orf137  | 0.491803279 | 3.134078212 |
| ENSG00000203872 | C6orf163  | 0.491803279 | 3.134078212 |
| ENSG00000203910 | C1orf146  | 0.491803279 | 3.134078212 |
| ENSG00000203970 | DEFB110   | 0.491803279 | 3.134078212 |
| ENSG00000204099 | NEU4      | 0.491803279 | 3.134078212 |
| ENSG00000204209 | DAXX      | 0.491803279 | 3.134078212 |
| ENSG00000204252 | HLA-DOA   | 0.491803279 | 3.134078212 |
| ENSG00000204262 | COL5A2    | 0.491803279 | 3.134078212 |
| ENSG00000204310 | AGPAT1    | 0.491803279 | 3.134078212 |
| ENSG00000204316 | MRPL38    | 0.491803279 | 3.134078212 |
| ENSG00000204351 | SKIV2L    | 0.491803279 | 3.134078212 |
| ENSG00000204381 | LAYN      | 0.491803279 | 3.134078212 |
| ENSG00000204444 | APOM      | 0.491803279 | 3.134078212 |
| ENSG00000204498 | NFKBIL1   | 0.491803279 | 3.134078212 |
| ENSG00000204568 | MRPS18B   | 0.491803279 | 3.134078212 |
| ENSG00000204590 | GNL1      | 0.491803279 | 3.134078212 |
| ENSG00000204612 | FOX B2    | 0.491803279 | 3.134078212 |
| ENSG00000204711 | C9orf135  | 0.491803279 | 3.134078212 |
| ENSG00000204790 | CBWD6     | 0.491803279 | 3.134078212 |
| ENSG00000204842 | ATXN2     | 0.491803279 | 3.134078212 |
| ENSG00000204897 | KRT25     | 0.491803279 | 3.134078212 |
| ENSG00000205029 | OR5D16    | 0.491803279 | 3.134078212 |
| ENSG00000205174 | C7orf66   | 0.491803279 | 3.134078212 |
| ENSG00000205212 | CCDC144NL | 0.491803279 | 3.134078212 |
| ENSG00000205213 | LGR4      | 0.491803279 | 3.134078212 |
| ENSG00000205327 | OR6C68    | 0.491803279 | 3.134078212 |
| ENSG00000205358 | MT1H      | 0.491803279 | 3.134078212 |
| ENSG00000205363 | C15orf59  | 0.491803279 | 3.134078212 |
| ENSG00000205409 | OR52E6    | 0.491803279 | 3.134078212 |
| ENSG00000205441 | KRTAP10-7 | 0.491803279 | 3.134078212 |
| ENSG00000205497 | OR51A4    | 0.491803279 | 3.134078212 |
| ENSG00000205683 | DPF3      | 0.491803279 | 3.134078212 |
| ENSG00000205835 | GMNC      | 0.491803279 | 3.134078212 |

|                 |            |             |             |
|-----------------|------------|-------------|-------------|
| ENSG00000205923 | CEMP1      | 0.491803279 | 3.134078212 |
| ENSG00000205981 | DNAJC19    | 0.491803279 | 3.134078212 |
| ENSG00000206043 | C18orf63   | 0.491803279 | 3.134078212 |
| ENSG00000206107 | KRTAP27-1  | 0.491803279 | 3.134078212 |
| ENSG00000206557 | TRIM71     | 0.491803279 | 3.134078212 |
| ENSG00000211452 | DIO1       | 0.491803279 | 3.134078212 |
| ENSG00000211584 | SLC48A1    | 0.491803279 | 3.134078212 |
| ENSG00000211892 | IGHG4      | 0.491803279 | 3.134078212 |
| ENSG00000211957 | IGHV3-35   | 0.491803279 | 3.134078212 |
| ENSG00000211968 | IGHV1-58   | 0.491803279 | 3.134078212 |
| ENSG00000212658 | KRTAP29-1  | 0.491803279 | 3.134078212 |
| ENSG00000212864 | RNF208     | 0.491803279 | 3.134078212 |
| ENSG00000212899 | KRTAP3-3   | 0.491803279 | 3.134078212 |
| ENSG00000212916 | MAP10      | 0.491803279 | 3.134078212 |
| ENSG00000213064 | SFT2D2     | 0.491803279 | 3.134078212 |
| ENSG00000213088 | DARC       | 0.491803279 | 3.134078212 |
| ENSG00000213341 | CHUK       | 0.491803279 | 3.134078212 |
| ENSG00000213462 | ERV3-1     | 0.491803279 | 3.134078212 |
| ENSG00000213516 | RBMXL1     | 0.491803279 | 3.134078212 |
| ENSG00000213588 | ZBTB9      | 0.491803279 | 3.134078212 |
| ENSG00000213639 | PPP1CB     | 0.491803279 | 3.134078212 |
| ENSG00000214290 | COLCA2     | 0.491803279 | 3.134078212 |
| ENSG00000214575 | CPEB1      | 0.491803279 | 3.134078212 |
| ENSG00000214711 | CAPN14     | 0.491803279 | 3.134078212 |
| ENSG00000215045 | GRID2IP    | 0.491803279 | 3.134078212 |
| ENSG00000215182 | MUC5AC     | 0.491803279 | 3.134078212 |
| ENSG00000215203 | GRXCR1     | 0.491803279 | 3.134078212 |
| ENSG00000215251 | FASTKD5    | 0.491803279 | 3.134078212 |
| ENSG00000215421 | ZNF407     | 0.491803279 | 3.134078212 |
| ENSG00000215595 | C20orf202  | 0.491803279 | 3.134078212 |
| ENSG00000217455 | AC091801.1 | 0.491803279 | 3.134078212 |
| ENSG00000219438 | FAM19A5    | 0.491803279 | 3.134078212 |
| ENSG00000220201 | ZGLP1      | 0.491803279 | 3.134078212 |
| ENSG00000221858 | OR2A12     | 0.491803279 | 3.134078212 |
| ENSG00000221874 | ZNF321P    | 0.491803279 | 3.134078212 |
| ENSG00000221923 | ZNF880     | 0.491803279 | 3.134078212 |
| ENSG00000221931 | OR6X1      | 0.491803279 | 3.134078212 |
| ENSG00000221932 | HEPN1      | 0.491803279 | 3.134078212 |
| ENSG00000221953 | C1orf229   | 0.491803279 | 3.134078212 |
| ENSG00000222004 | C7orf71    | 0.491803279 | 3.134078212 |
| ENSG00000222011 | FAM185A    | 0.491803279 | 3.134078212 |
| ENSG00000223496 | EXOSC6     | 0.491803279 | 3.134078212 |
| ENSG00000223648 | IGHV3-64   | 0.491803279 | 3.134078212 |
| ENSG00000224586 | GPX5       | 0.491803279 | 3.134078212 |
| ENSG00000224689 | ZNF812     | 0.491803279 | 3.134078212 |
| ENSG00000225526 | C3orf83    | 0.491803279 | 3.134078212 |
| ENSG00000225663 | FAM195B    | 0.491803279 | 3.134078212 |

|                 |            |             |             |
|-----------------|------------|-------------|-------------|
| ENSG00000226321 | AC104809.3 | 0.491803279 | 3.134078212 |
| ENSG00000226887 | ERVMER34-1 | 0.491803279 | 3.134078212 |
| ENSG00000227268 | KLLN       | 0.491803279 | 3.134078212 |
| ENSG00000227500 | SCAMP4     | 0.491803279 | 3.134078212 |
| ENSG00000227507 | LTB        | 0.491803279 | 3.134078212 |
| ENSG00000228672 | PROB1      | 0.491803279 | 3.134078212 |
| ENSG00000229453 | SPINK8     | 0.491803279 | 3.134078212 |
| ENSG00000229644 | NAMPTL     | 0.491803279 | 3.134078212 |
| ENSG00000230062 | ANKRD66    | 0.491803279 | 3.134078212 |
| ENSG00000230099 | TRBV5-4    | 0.491803279 | 3.134078212 |
| ENSG00000230989 | HSBP1      | 0.491803279 | 3.134078212 |
| ENSG00000231274 | SBK3       | 0.491803279 | 3.134078212 |
| ENSG00000232382 | OR5K1      | 0.491803279 | 3.134078212 |
| ENSG00000232869 | TRBV29-1   | 0.491803279 | 3.134078212 |
| ENSG00000233608 | TWIST2     | 0.491803279 | 3.134078212 |
| ENSG00000233670 | PIRT       | 0.491803279 | 3.134078212 |
| ENSG00000234068 | PAGE2      | 0.491803279 | 3.134078212 |
| ENSG00000234188 | AL121963.1 | 0.491803279 | 3.134078212 |
| ENSG00000234469 | AC002365.1 | 0.491803279 | 3.134078212 |
| ENSG00000234560 | OR10G8     | 0.491803279 | 3.134078212 |
| ENSG00000234745 | HLA-B      | 0.491803279 | 3.134078212 |
| ENSG00000235931 | C10orf40   | 0.491803279 | 3.134078212 |
| ENSG00000236279 | CLEC2L     | 0.491803279 | 3.134078212 |
| ENSG00000237765 | FAM200B    | 0.491803279 | 3.134078212 |
| ENSG00000238227 | C9orf69    | 0.491803279 | 3.134078212 |
| ENSG00000238243 | OR2W3      | 0.491803279 | 3.134078212 |
| ENSG00000238244 | GABARAPL3  | 0.491803279 | 3.134078212 |
| ENSG00000239900 | ADSL       | 0.491803279 | 3.134078212 |
| ENSG00000240184 | PCDHGC3    | 0.491803279 | 3.134078212 |
| ENSG00000240583 | AQP1       | 0.491803279 | 3.134078212 |
| ENSG00000240849 | TMEM189    | 0.491803279 | 3.134078212 |
| ENSG00000241127 | YAE1D1     | 0.491803279 | 3.134078212 |
| ENSG00000241186 | TDGF1      | 0.491803279 | 3.134078212 |
| ENSG00000241343 | RPL36A     | 0.491803279 | 3.134078212 |
| ENSG00000241878 | PISD       | 0.491803279 | 3.134078212 |
| ENSG00000242366 | UGT1A1     | 0.491803279 | 3.134078212 |
| ENSG00000242689 | CNTF       | 0.491803279 | 3.134078212 |
| ENSG00000242732 | RGAG4      | 0.491803279 | 3.134078212 |
| ENSG00000243335 | KCTD7      | 0.491803279 | 3.134078212 |
| ENSG00000243414 | TICAM2     | 0.491803279 | 3.134078212 |
| ENSG00000243646 | IL10RB     | 0.491803279 | 3.134078212 |
| ENSG00000243943 | ZNF512     | 0.491803279 | 3.134078212 |
| ENSG00000243989 | ACY1       | 0.491803279 | 3.134078212 |
| ENSG00000244187 | TMEM141    | 0.491803279 | 3.134078212 |
| ENSG00000244474 | UGT1A4     | 0.491803279 | 3.134078212 |
| ENSG00000244687 | UBE2V1     | 0.491803279 | 3.134078212 |
| ENSG00000244694 | PTCHD4     | 0.491803279 | 3.134078212 |

|                 |                |             |             |
|-----------------|----------------|-------------|-------------|
| ENSG00000245848 | CEBPA          | 0.491803279 | 3.134078212 |
| ENSG00000246922 | UBAP1L         | 0.491803279 | 3.134078212 |
| ENSG00000248098 | BCKDHA         | 0.491803279 | 3.134078212 |
| ENSG00000249961 | CCDC79         | 0.491803279 | 3.134078212 |
| ENSG00000250127 | CTD-2117L12.1  | 0.491803279 | 3.134078212 |
| ENSG00000250424 | AQP1           | 0.491803279 | 3.134078212 |
| ENSG00000250565 | ATP6V1E2       | 0.491803279 | 3.134078212 |
| ENSG00000251201 | TMED7-TICAM2   | 0.491803279 | 3.134078212 |
| ENSG00000251247 | ZNF345         | 0.491803279 | 3.134078212 |
| ENSG00000251569 | RP11-724O16.1  | 0.491803279 | 3.134078212 |
| ENSG00000253313 | C1orf210       | 0.491803279 | 3.134078212 |
| ENSG00000253846 | PCDHGA10       | 0.491803279 | 3.134078212 |
| ENSG00000254122 | PCDHGB7        | 0.491803279 | 3.134078212 |
| ENSG00000254245 | PCDHGA3        | 0.491803279 | 3.134078212 |
| ENSG00000254531 | AP001816.1     | 0.491803279 | 3.134078212 |
| ENSG00000254550 | OMP            | 0.491803279 | 3.134078212 |
| ENSG00000255072 | PIGY           | 0.491803279 | 3.134078212 |
| ENSG00000255150 | EID3           | 0.491803279 | 3.134078212 |
| ENSG00000255223 | OR5M11         | 0.491803279 | 3.134078212 |
| ENSG00000255284 | AP006621.5     | 0.491803279 | 3.134078212 |
| ENSG00000255298 | OR8G5          | 0.491803279 | 3.134078212 |
| ENSG00000255394 | C8orf49        | 0.491803279 | 3.134078212 |
| ENSG00000255423 | EBLN2          | 0.491803279 | 3.134078212 |
| ENSG00000255470 | RP11-113D6.6   | 0.491803279 | 3.134078212 |
| ENSG00000255529 | POLR2M         | 0.491803279 | 3.134078212 |
| ENSG00000255730 | CTC-435M10.3   | 0.491803279 | 3.134078212 |
| ENSG00000255974 | CYP2A6         | 0.491803279 | 3.134078212 |
| ENSG00000256188 | TAS2R30        | 0.491803279 | 3.134078212 |
| ENSG00000256235 | SMIM3          | 0.491803279 | 3.134078212 |
| ENSG00000256590 | TRDV3          | 0.491803279 | 3.134078212 |
| ENSG00000256660 | CLEC12B        | 0.491803279 | 3.134078212 |
| ENSG00000256771 | ZNF253         | 0.491803279 | 3.134078212 |
| ENSG00000257529 | RPL36A-HNRNPH2 | 0.491803279 | 3.134078212 |
| ENSG00000258311 | RP11-644F5.10  | 0.491803279 | 3.134078212 |
| ENSG00000258429 | PDF            | 0.491803279 | 3.134078212 |
| ENSG00000258713 | C20orf141      | 0.491803279 | 3.134078212 |
| ENSG00000259332 | ST20-MTHFS     | 0.491803279 | 3.134078212 |
| ENSG00000259642 | C15orf37       | 0.491803279 | 3.134078212 |
| ENSG00000260027 | HOXB7          | 0.491803279 | 3.134078212 |
| ENSG00000261701 | HPR            | 0.491803279 | 3.134078212 |
| ENSG00000262180 | OCLM           | 0.491803279 | 3.134078212 |
| ENSG00000262576 | PCDHGA4        | 0.491803279 | 3.134078212 |
| ENSG00000267531 | AC020922.1     | 0.491803279 | 3.134078212 |
| ENSG00000267680 | ZNF224         | 0.491803279 | 3.134078212 |
| ENSG00000267964 | AC022400.2     | 0.491803279 | 3.134078212 |
| ENSG00000268509 | AC026202.1     | 0.491803279 | 3.134078212 |
| ENSG00000269636 | AC010441.1     | 0.491803279 | 3.134078212 |

|                 |                |             |             |
|-----------------|----------------|-------------|-------------|
| ENSG00000270011 | ZNF559-ZNF177  | 0.491803279 | 3.134078212 |
| ENSG00000272896 | RP11-216L13.17 | 0.491803279 | 3.134078212 |
| ENSG00000273079 | GRIN2B         | 0.491803279 | 3.134078212 |
| ENSG00000197653 | DNAH10         | 0.492079869 | 1.41635937  |
| ENSG0000010818  | HIVEP2         | 0.492142512 | 1.663324979 |
| ENSG00000029363 | BCLAF1         | 0.492142512 | 1.663324979 |
| ENSG00000047578 | KIAA0556       | 0.492142512 | 1.663324979 |
| ENSG00000065534 | MYLK           | 0.492142512 | 1.663324979 |
| ENSG00000066827 | ZFAT           | 0.492142512 | 1.663324979 |
| ENSG00000067369 | TP53BP1        | 0.492142512 | 1.663324979 |
| ENSG00000077232 | DNAJC10        | 0.492142512 | 1.663324979 |
| ENSG00000100056 | DGCR14         | 0.492142512 | 1.663324979 |
| ENSG00000100330 | MTMR3          | 0.492142512 | 1.663324979 |
| ENSG00000101425 | BPI            | 0.492142512 | 1.663324979 |
| ENSG00000102893 | PHKB           | 0.492142512 | 1.663324979 |
| ENSG00000104998 | IL27RA         | 0.492142512 | 1.663324979 |
| ENSG00000107165 | TYRP1          | 0.492142512 | 1.663324979 |
| ENSG00000107890 | ANKRD26        | 0.492142512 | 1.663324979 |
| ENSG00000113763 | UNC5A          | 0.492142512 | 1.663324979 |
| ENSG00000115970 | THADA          | 0.492142512 | 1.663324979 |
| ENSG00000122359 | ANXA11         | 0.492142512 | 1.663324979 |
| ENSG00000122882 | ECD            | 0.492142512 | 1.663324979 |
| ENSG00000124198 | ARFGF2         | 0.492142512 | 1.663324979 |
| ENSG00000124602 | UNC5CL         | 0.492142512 | 1.663324979 |
| ENSG00000126461 | SCAF1          | 0.492142512 | 1.663324979 |
| ENSG00000129003 | VPS13C         | 0.492142512 | 1.663324979 |
| ENSG00000129925 | TMEM8A         | 0.492142512 | 1.663324979 |
| ENSG00000132024 | CC2D1A         | 0.492142512 | 1.663324979 |
| ENSG00000132554 | RGS22          | 0.492142512 | 1.663324979 |
| ENSG00000132561 | MATN2          | 0.492142512 | 1.663324979 |
| ENSG00000133805 | AMPD3          | 0.492142512 | 1.663324979 |
| ENSG00000134222 | PSRC1          | 0.492142512 | 1.663324979 |
| ENSG00000134759 | ELP2           | 0.492142512 | 1.663324979 |
| ENSG00000135773 | CAPN9          | 0.492142512 | 1.663324979 |
| ENSG00000137936 | BCAR3          | 0.492142512 | 1.663324979 |
| ENSG00000138002 | IFT172         | 0.492142512 | 1.663324979 |
| ENSG00000138182 | KIF20B         | 0.492142512 | 1.663324979 |
| ENSG00000146414 | SHPRH          | 0.492142512 | 1.663324979 |
| ENSG00000155974 | GRIP1          | 0.492142512 | 1.663324979 |
| ENSG00000157765 | SLC34A2        | 0.492142512 | 1.663324979 |
| ENSG00000157827 | FMNL2          | 0.492142512 | 1.663324979 |
| ENSG00000159337 | PLA2G4D        | 0.492142512 | 1.663324979 |
| ENSG00000163516 | ANKZF1         | 0.492142512 | 1.663324979 |
| ENSG00000163531 | NFASC          | 0.492142512 | 1.663324979 |
| ENSG00000164010 | ERMAP          | 0.492142512 | 1.663324979 |
| ENSG00000165097 | KDM1B          | 0.492142512 | 1.663324979 |
| ENSG00000166016 | ABTB2          | 0.492142512 | 1.663324979 |

|                 |          |             |             |
|-----------------|----------|-------------|-------------|
| ENSG00000168228 | ZCCHC4   | 0.492142512 | 1.663324979 |
| ENSG00000169432 | SCN9A    | 0.492142512 | 1.663324979 |
| ENSG00000170537 | TMC7     | 0.492142512 | 1.663324979 |
| ENSG00000171914 | TLN2     | 0.492142512 | 1.663324979 |
| ENSG00000172671 | ZFAND4   | 0.492142512 | 1.663324979 |
| ENSG00000173662 | TAS1R1   | 0.492142512 | 1.663324979 |
| ENSG00000175595 | ERCC4    | 0.492142512 | 1.663324979 |
| ENSG00000176406 | RIMS2    | 0.492142512 | 1.663324979 |
| ENSG00000177459 | C8orf47  | 0.492142512 | 1.663324979 |
| ENSG00000180113 | TDRD6    | 0.492142512 | 1.663324979 |
| ENSG00000182938 | OTOP3    | 0.492142512 | 1.663324979 |
| ENSG00000184144 | CNTN2    | 0.492142512 | 1.663324979 |
| ENSG00000186074 | CD300LF  | 0.492142512 | 1.663324979 |
| ENSG00000186119 | OR5D18   | 0.492142512 | 1.663324979 |
| ENSG00000203965 | EFCAB7   | 0.492142512 | 1.663324979 |
| ENSG00000204611 | ZNF616   | 0.492142512 | 1.663324979 |
| ENSG00000205592 | MUC19    | 0.492142512 | 1.663324979 |
| ENSG00000213996 | TM6SF2   | 0.492142512 | 1.663324979 |
| ENSG00000228198 | OR2M3    | 0.492142512 | 1.663324979 |
| ENSG00000164308 | ERAP2    | 0.497278871 | 0.538461538 |
| ENSG00000183354 | KIAA2026 | 0.497278871 | 0.538461538 |
| ENSG00000225830 | ERCC6    | 0.497278871 | 0.538461538 |
| ENSG00000004838 | ZMYND10  | 0.497387858 | 0.202209945 |
| ENSG00000004939 | SLC4A1   | 0.497387858 | 0.202209945 |
| ENSG00000006071 | ABCC8    | 0.497387858 | 0.202209945 |
| ENSG00000006534 | ALDH3B1  | 0.497387858 | 0.202209945 |
| ENSG00000007908 | SELE     | 0.497387858 | 0.202209945 |
| ENSG00000008294 | SPAG9    | 0.497387858 | 0.202209945 |
| ENSG00000011478 | QPCTL    | 0.497387858 | 0.202209945 |
| ENSG00000019582 | CD74     | 0.497387858 | 0.202209945 |
| ENSG00000023572 | GLRX2    | 0.497387858 | 0.202209945 |
| ENSG00000032444 | PNPLA6   | 0.497387858 | 0.202209945 |
| ENSG00000033327 | GAB2     | 0.497387858 | 0.202209945 |
| ENSG00000033627 | ATP6V0A1 | 0.497387858 | 0.202209945 |
| ENSG00000039319 | ZFYVE16  | 0.497387858 | 0.202209945 |
| ENSG00000041802 | LSG1     | 0.497387858 | 0.202209945 |
| ENSG00000042088 | TDP1     | 0.497387858 | 0.202209945 |
| ENSG00000054356 | PTPRN    | 0.497387858 | 0.202209945 |
| ENSG00000056586 | RC3H2    | 0.497387858 | 0.202209945 |
| ENSG00000057704 | TMCC3    | 0.497387858 | 0.202209945 |
| ENSG00000060656 | PTPRU    | 0.497387858 | 0.202209945 |
| ENSG00000062822 | POLD1    | 0.497387858 | 0.202209945 |
| ENSG00000064655 | EYA2     | 0.497387858 | 0.202209945 |
| ENSG00000065427 | KARS     | 0.497387858 | 0.202209945 |
| ENSG00000066248 | NGEF     | 0.497387858 | 0.202209945 |
| ENSG00000066926 | FECH     | 0.497387858 | 0.202209945 |
| ENSG00000067842 | ATP2B3   | 0.497387858 | 0.202209945 |

|                 |           |             |             |
|-----------------|-----------|-------------|-------------|
| ENSG00000068831 | RASGRP2   | 0.497387858 | 0.202209945 |
| ENSG00000072201 | LNK1      | 0.497387858 | 0.202209945 |
| ENSG00000074054 | CLASP1    | 0.497387858 | 0.202209945 |
| ENSG00000074410 | CA12      | 0.497387858 | 0.202209945 |
| ENSG00000077420 | APBB1IP   | 0.497387858 | 0.202209945 |
| ENSG00000082497 | SERTAD4   | 0.497387858 | 0.202209945 |
| ENSG00000087087 | SRRT      | 0.497387858 | 0.202209945 |
| ENSG00000087494 | PTHLH     | 0.497387858 | 0.202209945 |
| ENSG00000088386 | SLC15A1   | 0.497387858 | 0.202209945 |
| ENSG00000090097 | PCBP4     | 0.497387858 | 0.202209945 |
| ENSG00000090975 | PITPNM2   | 0.497387858 | 0.202209945 |
| ENSG00000095203 | EPB41L4B  | 0.497387858 | 0.202209945 |
| ENSG00000096060 | FKBP5     | 0.497387858 | 0.202209945 |
| ENSG00000100150 | DEPDC5    | 0.497387858 | 0.202209945 |
| ENSG00000100599 | RIN3      | 0.497387858 | 0.202209945 |
| ENSG00000100600 | LGMM      | 0.497387858 | 0.202209945 |
| ENSG00000101464 | PIGU      | 0.497387858 | 0.202209945 |
| ENSG00000102935 | ZNF423    | 0.497387858 | 0.202209945 |
| ENSG00000103089 | FA2H      | 0.497387858 | 0.202209945 |
| ENSG00000104835 | SARS2     | 0.497387858 | 0.202209945 |
| ENSG00000104936 | DMPK      | 0.497387858 | 0.202209945 |
| ENSG00000105088 | OLFM2     | 0.497387858 | 0.202209945 |
| ENSG00000105173 | CCNE1     | 0.497387858 | 0.202209945 |
| ENSG00000105229 | PIAS4     | 0.497387858 | 0.202209945 |
| ENSG00000105538 | RASIP1    | 0.497387858 | 0.202209945 |
| ENSG00000105549 | THEG      | 0.497387858 | 0.202209945 |
| ENSG00000106009 | BRAT1     | 0.497387858 | 0.202209945 |
| ENSG00000107864 | CPEB3     | 0.497387858 | 0.202209945 |
| ENSG00000108296 | CWC25     | 0.497387858 | 0.202209945 |
| ENSG00000110195 | FOLR1     | 0.497387858 | 0.202209945 |
| ENSG00000110318 | KIAA1377  | 0.497387858 | 0.202209945 |
| ENSG00000110427 | KIAA1549L | 0.497387858 | 0.202209945 |
| ENSG00000112175 | BMP5      | 0.497387858 | 0.202209945 |
| ENSG00000112357 | PEX7      | 0.497387858 | 0.202209945 |
| ENSG00000112787 | FBRSL1    | 0.497387858 | 0.202209945 |
| ENSG00000112902 | SEMA5A    | 0.497387858 | 0.202209945 |
| ENSG00000112936 | C7        | 0.497387858 | 0.202209945 |
| ENSG00000113073 | SLC4A9    | 0.497387858 | 0.202209945 |
| ENSG00000113396 | SLC27A6   | 0.497387858 | 0.202209945 |
| ENSG00000114166 | KAT2B     | 0.497387858 | 0.202209945 |
| ENSG00000114204 | SERPINI2  | 0.497387858 | 0.202209945 |
| ENSG00000114473 | IQCG      | 0.497387858 | 0.202209945 |
| ENSG00000114790 | ARHGEF26  | 0.497387858 | 0.202209945 |
| ENSG00000114904 | NEK4      | 0.497387858 | 0.202209945 |
| ENSG00000115461 | IGFBP5    | 0.497387858 | 0.202209945 |
| ENSG00000115648 | MLPH      | 0.497387858 | 0.202209945 |
| ENSG00000116580 | GON4L     | 0.497387858 | 0.202209945 |

|                 |          |             |             |
|-----------------|----------|-------------|-------------|
| ENSG00000119401 | TRIM32   | 0.497387858 | 0.202209945 |
| ENSG00000119711 | ALDH6A1  | 0.497387858 | 0.202209945 |
| ENSG00000119787 | ATL2     | 0.497387858 | 0.202209945 |
| ENSG00000119888 | EPCAM    | 0.497387858 | 0.202209945 |
| ENSG00000119977 | TCTN3    | 0.497387858 | 0.202209945 |
| ENSG00000120708 | TGFBI    | 0.497387858 | 0.202209945 |
| ENSG00000120952 | PRAMEF2  | 0.497387858 | 0.202209945 |
| ENSG00000121454 | LHX4     | 0.497387858 | 0.202209945 |
| ENSG00000122218 | COPA     | 0.497387858 | 0.202209945 |
| ENSG00000123360 | PDE1B    | 0.497387858 | 0.202209945 |
| ENSG00000124116 | WFDC3    | 0.497387858 | 0.202209945 |
| ENSG00000124157 | SEMG2    | 0.497387858 | 0.202209945 |
| ENSG00000124357 | NAGK     | 0.497387858 | 0.202209945 |
| ENSG00000124449 | IRGC     | 0.497387858 | 0.202209945 |
| ENSG00000125107 | CNOT1    | 0.497387858 | 0.202209945 |
| ENSG00000125482 | TTF1     | 0.497387858 | 0.202209945 |
| ENSG00000125503 | PPP1R12C | 0.497387858 | 0.202209945 |
| ENSG00000125657 | TNFSF9   | 0.497387858 | 0.202209945 |
| ENSG00000125872 | LRRN4    | 0.497387858 | 0.202209945 |
| ENSG00000126107 | HECTD3   | 0.497387858 | 0.202209945 |
| ENSG00000126460 | PRRG2    | 0.497387858 | 0.202209945 |
| ENSG00000126522 | ASL      | 0.497387858 | 0.202209945 |
| ENSG00000126777 | KTN1     | 0.497387858 | 0.202209945 |
| ENSG00000127838 | PNKD     | 0.497387858 | 0.202209945 |
| ENSG00000128829 | EIF2AK4  | 0.497387858 | 0.202209945 |
| ENSG00000128886 | ELL3     | 0.497387858 | 0.202209945 |
| ENSG00000129103 | SUMF2    | 0.497387858 | 0.202209945 |
| ENSG00000129354 | AP1M2    | 0.497387858 | 0.202209945 |
| ENSG00000129667 | RHBDF2   | 0.497387858 | 0.202209945 |
| ENSG00000130035 | GALNT8   | 0.497387858 | 0.202209945 |
| ENSG00000130201 | EXOC3L2  | 0.497387858 | 0.202209945 |
| ENSG00000130477 | UNC13A   | 0.497387858 | 0.202209945 |
| ENSG00000130559 | CAMSAP1  | 0.497387858 | 0.202209945 |
| ENSG00000130751 | NPAS1    | 0.497387858 | 0.202209945 |
| ENSG00000131115 | ZNF227   | 0.497387858 | 0.202209945 |
| ENSG00000131626 | PPFIA1   | 0.497387858 | 0.202209945 |
| ENSG00000131944 | C19orf40 | 0.497387858 | 0.202209945 |
| ENSG00000132676 | DAP3     | 0.497387858 | 0.202209945 |
| ENSG00000134461 | ANKRD16  | 0.497387858 | 0.202209945 |
| ENSG00000134516 | DOCK2    | 0.497387858 | 0.202209945 |
| ENSG00000134830 | C5AR2    | 0.497387858 | 0.202209945 |
| ENSG00000135046 | ANXA1    | 0.497387858 | 0.202209945 |
| ENSG00000135625 | EGR4     | 0.497387858 | 0.202209945 |
| ENSG00000135637 | CCDC142  | 0.497387858 | 0.202209945 |
| ENSG00000135926 | TMBIM1   | 0.497387858 | 0.202209945 |
| ENSG00000135951 | TSGA10   | 0.497387858 | 0.202209945 |
| ENSG00000135966 | TGFBRAP1 | 0.497387858 | 0.202209945 |

|                 |          |             |             |
|-----------------|----------|-------------|-------------|
| ENSG00000136114 | THSD1    | 0.497387858 | 0.202209945 |
| ENSG00000136122 | BORA     | 0.497387858 | 0.202209945 |
| ENSG00000136231 | IGF2BP3  | 0.497387858 | 0.202209945 |
| ENSG00000136237 | RAPGEF5  | 0.497387858 | 0.202209945 |
| ENSG00000136247 | ZDHHC4   | 0.497387858 | 0.202209945 |
| ENSG00000136937 | NCBP1    | 0.497387858 | 0.202209945 |
| ENSG00000137440 | FGFBP1   | 0.497387858 | 0.202209945 |
| ENSG00000138468 | SENP7    | 0.497387858 | 0.202209945 |
| ENSG00000138686 | BBS7     | 0.497387858 | 0.202209945 |
| ENSG00000138709 | LARP1B   | 0.497387858 | 0.202209945 |
| ENSG00000139344 | AMDHD1   | 0.497387858 | 0.202209945 |
| ENSG00000139641 | ESYT1    | 0.497387858 | 0.202209945 |
| ENSG00000139921 | TMX1     | 0.497387858 | 0.202209945 |
| ENSG00000140105 | WARS     | 0.497387858 | 0.202209945 |
| ENSG00000140521 | POLG     | 0.497387858 | 0.202209945 |
| ENSG00000142149 | HUNK     | 0.497387858 | 0.202209945 |
| ENSG00000142675 | CNKSRI   | 0.497387858 | 0.202209945 |
| ENSG00000142751 | GPN2     | 0.497387858 | 0.202209945 |
| ENSG00000143315 | PIGM     | 0.497387858 | 0.202209945 |
| ENSG00000143418 | CERS2    | 0.497387858 | 0.202209945 |
| ENSG00000143457 | GOLPH3L  | 0.497387858 | 0.202209945 |
| ENSG00000144535 | DIS3L2   | 0.497387858 | 0.202209945 |
| ENSG00000144647 | POMGNT2  | 0.497387858 | 0.202209945 |
| ENSG00000144824 | PHLDB2   | 0.497387858 | 0.202209945 |
| ENSG00000145863 | GABRA6   | 0.497387858 | 0.202209945 |
| ENSG00000146072 | TNFRSF21 | 0.497387858 | 0.202209945 |
| ENSG00000146648 | EGFR     | 0.497387858 | 0.202209945 |
| ENSG00000146904 | EPHA1    | 0.497387858 | 0.202209945 |
| ENSG00000147316 | MCPH1    | 0.497387858 | 0.202209945 |
| ENSG00000148082 | SHC3     | 0.497387858 | 0.202209945 |
| ENSG00000148120 | C9orf3   | 0.497387858 | 0.202209945 |
| ENSG00000148341 | SH3GLB2  | 0.497387858 | 0.202209945 |
| ENSG00000149043 | SYT8     | 0.497387858 | 0.202209945 |
| ENSG00000149182 | ARFGAP2  | 0.497387858 | 0.202209945 |
| ENSG00000149243 | KLHL35   | 0.497387858 | 0.202209945 |
| ENSG00000149451 | ADAM33   | 0.497387858 | 0.202209945 |
| ENSG00000149476 | DAK      | 0.497387858 | 0.202209945 |
| ENSG00000149503 | INCENP   | 0.497387858 | 0.202209945 |
| ENSG00000149573 | MPZL2    | 0.497387858 | 0.202209945 |
| ENSG00000149716 | ORAOV1   | 0.497387858 | 0.202209945 |
| ENSG00000151364 | KCTD14   | 0.497387858 | 0.202209945 |
| ENSG00000155085 | AK9      | 0.497387858 | 0.202209945 |
| ENSG00000156256 | USP16    | 0.497387858 | 0.202209945 |
| ENSG00000156282 | CLDN17   | 0.497387858 | 0.202209945 |
| ENSG00000156509 | FBXO43   | 0.497387858 | 0.202209945 |
| ENSG00000157212 | PAXIP1   | 0.497387858 | 0.202209945 |
| ENSG00000158481 | CD1C     | 0.497387858 | 0.202209945 |

|                 |          |             |             |
|-----------------|----------|-------------|-------------|
| ENSG00000158485 | CD1B     | 0.497387858 | 0.202209945 |
| ENSG00000158764 | ITLN2    | 0.497387858 | 0.202209945 |
| ENSG00000159374 | M1AP     | 0.497387858 | 0.202209945 |
| ENSG00000159899 | NPR2     | 0.497387858 | 0.202209945 |
| ENSG00000160584 | SIK3     | 0.497387858 | 0.202209945 |
| ENSG00000160791 | CCR5     | 0.497387858 | 0.202209945 |
| ENSG00000160796 | NBEAL2   | 0.497387858 | 0.202209945 |
| ENSG00000160856 | FCRL3    | 0.497387858 | 0.202209945 |
| ENSG00000160882 | CYP11B1  | 0.497387858 | 0.202209945 |
| ENSG00000161031 | PGLYRP2  | 0.497387858 | 0.202209945 |
| ENSG00000161905 | ALOX15   | 0.497387858 | 0.202209945 |
| ENSG00000161981 | SNRNP25  | 0.497387858 | 0.202209945 |
| ENSG00000162735 | PEX19    | 0.497387858 | 0.202209945 |
| ENSG00000163026 | C2orf44  | 0.497387858 | 0.202209945 |
| ENSG00000163113 | OTUD7B   | 0.497387858 | 0.202209945 |
| ENSG00000163114 | PDHA2    | 0.497387858 | 0.202209945 |
| ENSG00000163155 | LYSMD1   | 0.497387858 | 0.202209945 |
| ENSG00000163519 | TRAT1    | 0.497387858 | 0.202209945 |
| ENSG00000163833 | FBXO40   | 0.497387858 | 0.202209945 |
| ENSG00000163935 | SFMBT1   | 0.497387858 | 0.202209945 |
| ENSG00000164049 | FBXW12   | 0.497387858 | 0.202209945 |
| ENSG00000164494 | PDSS2    | 0.497387858 | 0.202209945 |
| ENSG00000165071 | TMEM71   | 0.497387858 | 0.202209945 |
| ENSG00000165304 | MELK     | 0.497387858 | 0.202209945 |
| ENSG00000165474 | GJB2     | 0.497387858 | 0.202209945 |
| ENSG00000165490 | C11orf82 | 0.497387858 | 0.202209945 |
| ENSG00000165816 | VWA2     | 0.497387858 | 0.202209945 |
| ENSG00000165923 | AGBL2    | 0.497387858 | 0.202209945 |
| ENSG00000166188 | ZNF319   | 0.497387858 | 0.202209945 |
| ENSG00000166411 | IDH3A    | 0.497387858 | 0.202209945 |
| ENSG00000166558 | SLC38A8  | 0.497387858 | 0.202209945 |
| ENSG00000167377 | ZNF23    | 0.497387858 | 0.202209945 |
| ENSG00000167419 | LPO      | 0.497387858 | 0.202209945 |
| ENSG00000167513 | CDT1     | 0.497387858 | 0.202209945 |
| ENSG00000167632 | TRAPPC9  | 0.497387858 | 0.202209945 |
| ENSG00000167642 | SPINT2   | 0.497387858 | 0.202209945 |
| ENSG00000167646 | DNAAF3   | 0.497387858 | 0.202209945 |
| ENSG00000168065 | SLC22A11 | 0.497387858 | 0.202209945 |
| ENSG00000168124 | OR1F1    | 0.497387858 | 0.202209945 |
| ENSG00000168229 | PTGDR    | 0.497387858 | 0.202209945 |
| ENSG00000168538 | TRAPPC11 | 0.497387858 | 0.202209945 |
| ENSG00000168631 | DPCR1    | 0.497387858 | 0.202209945 |
| ENSG00000168758 | SEMA4C   | 0.497387858 | 0.202209945 |
| ENSG00000169047 | IRS1     | 0.497387858 | 0.202209945 |
| ENSG00000169436 | COL22A1  | 0.497387858 | 0.202209945 |
| ENSG00000169607 | CKAP2L   | 0.497387858 | 0.202209945 |
| ENSG00000169683 | LRR45    | 0.497387858 | 0.202209945 |

|                 |          |             |             |
|-----------------|----------|-------------|-------------|
| ENSG00000170561 | IRX2     | 0.497387858 | 0.202209945 |
| ENSG00000170734 | POLH     | 0.497387858 | 0.202209945 |
| ENSG00000171481 | OR1L3    | 0.497387858 | 0.202209945 |
| ENSG00000171517 | LPAR3    | 0.497387858 | 0.202209945 |
| ENSG00000171853 | TRAPPC12 | 0.497387858 | 0.202209945 |
| ENSG00000171992 | SYNPO    | 0.497387858 | 0.202209945 |
| ENSG00000172493 | AFF1     | 0.497387858 | 0.202209945 |
| ENSG00000172613 | RAD9A    | 0.497387858 | 0.202209945 |
| ENSG00000172689 | MS4A10   | 0.497387858 | 0.202209945 |
| ENSG00000172986 | GXYLT2   | 0.497387858 | 0.202209945 |
| ENSG00000172995 | ARPP21   | 0.497387858 | 0.202209945 |
| ENSG00000173083 | HPSE     | 0.497387858 | 0.202209945 |
| ENSG00000173376 | NDNF     | 0.497387858 | 0.202209945 |
| ENSG00000174498 | IGDCC3   | 0.497387858 | 0.202209945 |
| ENSG00000174744 | BRMS1    | 0.497387858 | 0.202209945 |
| ENSG00000175073 | VCPIP1   | 0.497387858 | 0.202209945 |
| ENSG00000175787 | ZNF169   | 0.497387858 | 0.202209945 |
| ENSG00000176246 | OR4L1    | 0.497387858 | 0.202209945 |
| ENSG00000176253 | OR4K13   | 0.497387858 | 0.202209945 |
| ENSG00000176920 | FUT2     | 0.497387858 | 0.202209945 |
| ENSG00000177294 | FBXO39   | 0.497387858 | 0.202209945 |
| ENSG00000177409 | SAMD9L   | 0.497387858 | 0.202209945 |
| ENSG00000177946 | CENPBD1  | 0.497387858 | 0.202209945 |
| ENSG00000178031 | ADAMTSL1 | 0.497387858 | 0.202209945 |
| ENSG00000178385 | PLEKHM3  | 0.497387858 | 0.202209945 |
| ENSG00000179832 | MROH1    | 0.497387858 | 0.202209945 |
| ENSG00000180871 | CXCR2    | 0.497387858 | 0.202209945 |
| ENSG00000181689 | OR8K3    | 0.497387858 | 0.202209945 |
| ENSG00000181718 | OR5T2    | 0.497387858 | 0.202209945 |
| ENSG00000181733 | OR2Z1    | 0.497387858 | 0.202209945 |
| ENSG00000182698 | RESP18   | 0.497387858 | 0.202209945 |
| ENSG00000182858 | ALG12    | 0.497387858 | 0.202209945 |
| ENSG00000183751 | TBL3     | 0.497387858 | 0.202209945 |
| ENSG00000184012 | TMPRSS2  | 0.497387858 | 0.202209945 |
| ENSG00000184384 | MAML2    | 0.497387858 | 0.202209945 |
| ENSG00000184719 | RNLS     | 0.497387858 | 0.202209945 |
| ENSG00000185009 | AP3M1    | 0.497387858 | 0.202209945 |
| ENSG00000185245 | GP1BA    | 0.497387858 | 0.202209945 |
| ENSG00000186017 | ZNF566   | 0.497387858 | 0.202209945 |
| ENSG00000186118 | TEX38    | 0.497387858 | 0.202209945 |
| ENSG00000186334 | SLC36A3  | 0.497387858 | 0.202209945 |
| ENSG00000187288 | CIDEC    | 0.497387858 | 0.202209945 |
| ENSG00000187546 | AGMO     | 0.497387858 | 0.202209945 |
| ENSG00000187554 | TLR5     | 0.497387858 | 0.202209945 |
| ENSG00000187792 | ZNF70    | 0.497387858 | 0.202209945 |
| ENSG00000187848 | P2RX2    | 0.497387858 | 0.202209945 |
| ENSG00000188167 | TMPPE    | 0.497387858 | 0.202209945 |

|                 |             |             |             |
|-----------------|-------------|-------------|-------------|
| ENSG00000189375 | TBC1D28     | 0.497387858 | 0.202209945 |
| ENSG00000196233 | LCOR        | 0.497387858 | 0.202209945 |
| ENSG00000196531 | NACA        | 0.497387858 | 0.202209945 |
| ENSG00000196832 | OR11G2      | 0.497387858 | 0.202209945 |
| ENSG00000198301 | SDAD1       | 0.497387858 | 0.202209945 |
| ENSG00000198400 | NTRK1       | 0.497387858 | 0.202209945 |
| ENSG00000198715 | C1orf85     | 0.497387858 | 0.202209945 |
| ENSG00000198730 | CTR9        | 0.497387858 | 0.202209945 |
| ENSG00000198734 | F5          | 0.497387858 | 0.202209945 |
| ENSG00000198752 | CDC42BPB    | 0.497387858 | 0.202209945 |
| ENSG00000198765 | SYCP1       | 0.497387858 | 0.202209945 |
| ENSG00000198924 | DCLRE1A     | 0.497387858 | 0.202209945 |
| ENSG00000203690 | TCP10       | 0.497387858 | 0.202209945 |
| ENSG00000203942 | C10orf62    | 0.497387858 | 0.202209945 |
| ENSG00000204219 | TCEA3       | 0.497387858 | 0.202209945 |
| ENSG00000204406 | MBD5        | 0.497387858 | 0.202209945 |
| ENSG00000204428 | LY6G5C      | 0.497387858 | 0.202209945 |
| ENSG00000204576 | PRR3        | 0.497387858 | 0.202209945 |
| ENSG00000205081 | CXorf30     | 0.497387858 | 0.202209945 |
| ENSG00000211891 | IGHE        | 0.497387858 | 0.202209945 |
| ENSG00000213995 | CARKD       | 0.497387858 | 0.202209945 |
| ENSG00000224916 | APOC4-APOC2 | 0.497387858 | 0.202209945 |
| ENSG00000231389 | HLA-DPA1    | 0.497387858 | 0.202209945 |
| ENSG00000242612 | DECR2       | 0.497387858 | 0.202209945 |
| ENSG00000243811 | APOBEC3D    | 0.497387858 | 0.202209945 |
| ENSG00000244588 | RAD21L1     | 0.497387858 | 0.202209945 |
| ENSG00000250722 | SEPP1       | 0.497387858 | 0.202209945 |
| ENSG00000255561 | FDXACB1     | 0.497387858 | 0.202209945 |
| ENSG00000271271 | UGT2A2      | 0.497387858 | 0.202209945 |
| ENSG00000006283 | CACNA1G     | 0.531762184 | 1.52991453  |
| ENSG00000090402 | SI          | 0.531762184 | 1.52991453  |
| ENSG00000108469 | RECQL5      | 0.531762184 | 1.52991453  |
| ENSG00000118193 | KIF14       | 0.531762184 | 1.52991453  |
| ENSG00000129422 | MTUS1       | 0.531762184 | 1.52991453  |
| ENSG00000134121 | CHL1        | 0.531762184 | 1.52991453  |
| ENSG00000138119 | MYOF        | 0.531762184 | 1.52991453  |
| ENSG00000138615 | CILP        | 0.531762184 | 1.52991453  |
| ENSG00000139144 | PIK3C2G     | 0.531762184 | 1.52991453  |
| ENSG00000143107 | FNDC7       | 0.531762184 | 1.52991453  |
| ENSG00000144229 | THSD7B      | 0.531762184 | 1.52991453  |
| ENSG00000144504 | ANKMY1      | 0.531762184 | 1.52991453  |
| ENSG00000151491 | EPS8        | 0.531762184 | 1.52991453  |
| ENSG00000154845 | PPP4R1      | 0.531762184 | 1.52991453  |
| ENSG00000156299 | TIAM1       | 0.531762184 | 1.52991453  |
| ENSG00000164061 | BSN         | 0.531762184 | 1.52991453  |
| ENSG00000165124 | SVEP1       | 0.531762184 | 1.52991453  |
| ENSG00000169031 | COL4A3      | 0.531762184 | 1.52991453  |

|                 |          |             |             |
|-----------------|----------|-------------|-------------|
| ENSG00000174502 | SLC26A9  | 0.531762184 | 1.52991453  |
| ENSG00000197410 | DCHS2    | 0.531762184 | 1.52991453  |
| ENSG00000197943 | PLCG2    | 0.531762184 | 1.52991453  |
| ENSG00000241945 | PWP2     | 0.531762184 | 1.52991453  |
| ENSG00000129566 | TEP1     | 0.536660069 | 0.6         |
| ENSG00000023516 | AKAP11   | 0.562686403 | 1.445291236 |
| ENSG00000127124 | HIVEP3   | 0.562686403 | 1.445291236 |
| ENSG00000132470 | ITGB4    | 0.562686403 | 1.445291236 |
| ENSG00000135476 | ESPL1    | 0.562686403 | 1.445291236 |
| ENSG00000138829 | FBN2     | 0.562686403 | 1.445291236 |
| ENSG00000151835 | SACS     | 0.562686403 | 1.445291236 |
| ENSG00000155754 | ALS2CR11 | 0.562686403 | 1.445291236 |
| ENSG00000160299 | PCNT     | 0.562686403 | 1.445291236 |
| ENSG00000197969 | VPS13A   | 0.562686403 | 1.445291236 |
| ENSG00000198211 | TUBB3    | 0.562686403 | 1.445291236 |
| ENSG00000258839 | MC1R     | 0.562686403 | 1.445291236 |
| ENSG00000188738 | FSIP2    | 0.56738449  | 0.647058824 |
| ENSG00000013288 | MAN2B2   | 0.587631253 | 1.386946387 |
| ENSG00000114841 | DNAH1    | 0.587631253 | 1.386946387 |
| ENSG00000137497 | NUMA1    | 0.587631253 | 1.386946387 |
| ENSG00000188162 | OTOG     | 0.587631253 | 1.386946387 |
| ENSG00000173821 | RNF213   | 0.608257415 | 1.344376278 |
| ENSG00000004468 | CD38     | 0.616792953 | 1.741996234 |
| ENSG00000005471 | ABCB4    | 0.616792953 | 1.741996234 |
| ENSG00000005893 | LAMP2    | 0.616792953 | 1.741996234 |
| ENSG00000006576 | PHTF2    | 0.616792953 | 1.741996234 |
| ENSG00000007866 | TEAD3    | 0.616792953 | 1.741996234 |
| ENSG00000008382 | MPND     | 0.616792953 | 1.741996234 |
| ENSG00000010072 | SPRTN    | 0.616792953 | 1.741996234 |
| ENSG00000010327 | STAB1    | 0.616792953 | 1.741996234 |
| ENSG00000010704 | HFE      | 0.616792953 | 1.741996234 |
| ENSG00000011114 | BTBD7    | 0.616792953 | 1.741996234 |
| ENSG00000011376 | LARS2    | 0.616792953 | 1.741996234 |
| ENSG00000013810 | TACC3    | 0.616792953 | 1.741996234 |
| ENSG00000014216 | CAPN1    | 0.616792953 | 1.741996234 |
| ENSG00000015532 | XYLT2    | 0.616792953 | 1.741996234 |
| ENSG00000023608 | SNAPC1   | 0.616792953 | 1.741996234 |
| ENSG00000026652 | AGPAT4   | 0.616792953 | 1.741996234 |
| ENSG00000026950 | BTN3A1   | 0.616792953 | 1.741996234 |
| ENSG00000037757 | MRI1     | 0.616792953 | 1.741996234 |
| ENSG00000038295 | TLL1     | 0.616792953 | 1.741996234 |
| ENSG00000047249 | ATP6V1H  | 0.616792953 | 1.741996234 |
| ENSG00000048649 | RSF1     | 0.616792953 | 1.741996234 |
| ENSG00000052126 | PLEKHA5  | 0.616792953 | 1.741996234 |
| ENSG00000052795 | FNIP2    | 0.616792953 | 1.741996234 |
| ENSG00000053770 | AP5M1    | 0.616792953 | 1.741996234 |
| ENSG00000053918 | KCNQ1    | 0.616792953 | 1.741996234 |

|                 |               |             |             |
|-----------------|---------------|-------------|-------------|
| ENSG00000054148 | PHPT1         | 0.616792953 | 1.741996234 |
| ENSG00000054793 | ATP9A         | 0.616792953 | 1.741996234 |
| ENSG00000056972 | TRAF3IP2      | 0.616792953 | 1.741996234 |
| ENSG00000058668 | ATP2B4        | 0.616792953 | 1.741996234 |
| ENSG00000059377 | TBXAS1        | 0.616792953 | 1.741996234 |
| ENSG00000060138 | YBX3          | 0.616792953 | 1.741996234 |
| ENSG00000060709 | RIMBP2        | 0.616792953 | 1.741996234 |
| ENSG00000061938 | TNK2          | 0.616792953 | 1.741996234 |
| ENSG00000062038 | CDH3          | 0.616792953 | 1.741996234 |
| ENSG00000064201 | TSPAN32       | 0.616792953 | 1.741996234 |
| ENSG00000064607 | SUGP2         | 0.616792953 | 1.741996234 |
| ENSG00000064703 | DDX20         | 0.616792953 | 1.741996234 |
| ENSG00000064787 | BCAS1         | 0.616792953 | 1.741996234 |
| ENSG00000065000 | AP3D1         | 0.616792953 | 1.741996234 |
| ENSG00000065413 | ANKRD44       | 0.616792953 | 1.741996234 |
| ENSG00000065615 | CYB5R4        | 0.616792953 | 1.741996234 |
| ENSG00000066813 | ACSM2B        | 0.616792953 | 1.741996234 |
| ENSG00000068024 | HDAC4         | 0.616792953 | 1.741996234 |
| ENSG00000068781 | STON1-GTF2A1L | 0.616792953 | 1.741996234 |
| ENSG00000069018 | TRPC7         | 0.616792953 | 1.741996234 |
| ENSG00000069424 | KCNAB2        | 0.616792953 | 1.741996234 |
| ENSG00000069702 | TGFBR3        | 0.616792953 | 1.741996234 |
| ENSG00000069712 | KIAA1107      | 0.616792953 | 1.741996234 |
| ENSG00000071073 | MGAT4A        | 0.616792953 | 1.741996234 |
| ENSG00000072182 | ASIC4         | 0.616792953 | 1.741996234 |
| ENSG00000072954 | TMEM38A       | 0.616792953 | 1.741996234 |
| ENSG00000074047 | GLI2          | 0.616792953 | 1.741996234 |
| ENSG00000075568 | TMEM131       | 0.616792953 | 1.741996234 |
| ENSG00000076043 | REXO2         | 0.616792953 | 1.741996234 |
| ENSG00000076258 | FMO4          | 0.616792953 | 1.741996234 |
| ENSG00000076344 | RGS11         | 0.616792953 | 1.741996234 |
| ENSG00000077097 | TOP2B         | 0.616792953 | 1.741996234 |
| ENSG00000077522 | ACTN2         | 0.616792953 | 1.741996234 |
| ENSG00000078898 | BPIFB2        | 0.616792953 | 1.741996234 |
| ENSG00000079134 | THOC1         | 0.616792953 | 1.741996234 |
| ENSG00000080200 | CRYBG3        | 0.616792953 | 1.741996234 |
| ENSG00000080823 | MOK           | 0.616792953 | 1.741996234 |
| ENSG00000081177 | EXD2          | 0.616792953 | 1.741996234 |
| ENSG00000083635 | NUFIP1        | 0.616792953 | 1.741996234 |
| ENSG00000083844 | ZNF264        | 0.616792953 | 1.741996234 |
| ENSG00000085382 | HACE1         | 0.616792953 | 1.741996234 |
| ENSG00000085491 | SLC25A24      | 0.616792953 | 1.741996234 |
| ENSG00000085563 | ABCB1         | 0.616792953 | 1.741996234 |
| ENSG00000085721 | RRN3          | 0.616792953 | 1.741996234 |
| ENSG00000085982 | USP40         | 0.616792953 | 1.741996234 |
| ENSG00000086619 | ERO1LB        | 0.616792953 | 1.741996234 |
| ENSG00000088205 | DDX18         | 0.616792953 | 1.741996234 |

|                 |           |             |             |
|-----------------|-----------|-------------|-------------|
| ENSG00000088854 | C20orf194 | 0.616792953 | 1.741996234 |
| ENSG00000089012 | SIRPG     | 0.616792953 | 1.741996234 |
| ENSG00000089116 | LHX5      | 0.616792953 | 1.741996234 |
| ENSG00000090432 | MUL1      | 0.616792953 | 1.741996234 |
| ENSG00000090565 | RAB11FIP3 | 0.616792953 | 1.741996234 |
| ENSG00000091137 | SLC26A4   | 0.616792953 | 1.741996234 |
| ENSG00000091831 | ESR1      | 0.616792953 | 1.741996234 |
| ENSG00000092439 | TRPM7     | 0.616792953 | 1.741996234 |
| ENSG00000094631 | HDAC6     | 0.616792953 | 1.741996234 |
| ENSG00000095383 | TBC1D2    | 0.616792953 | 1.741996234 |
| ENSG00000096093 | EFHC1     | 0.616792953 | 1.741996234 |
| ENSG00000099260 | PALMD     | 0.616792953 | 1.741996234 |
| ENSG00000100170 | SLC5A1    | 0.616792953 | 1.741996234 |
| ENSG00000100364 | KIAA0930  | 0.616792953 | 1.741996234 |
| ENSG00000100426 | ZBED4     | 0.616792953 | 1.741996234 |
| ENSG00000100427 | MLC1      | 0.616792953 | 1.741996234 |
| ENSG00000100628 | ASB2      | 0.616792953 | 1.741996234 |
| ENSG00000100644 | HIF1A     | 0.616792953 | 1.741996234 |
| ENSG00000100665 | SERPINA4  | 0.616792953 | 1.741996234 |
| ENSG00000100852 | ARHGAP5   | 0.616792953 | 1.741996234 |
| ENSG00000101074 | R3HDML    | 0.616792953 | 1.741996234 |
| ENSG00000101251 | SEL1L2    | 0.616792953 | 1.741996234 |
| ENSG00000101280 | ANGPT4    | 0.616792953 | 1.741996234 |
| ENSG00000101282 | RSPO4     | 0.616792953 | 1.741996234 |
| ENSG00000101448 | EPPIN     | 0.616792953 | 1.741996234 |
| ENSG00000101546 | RBFA      | 0.616792953 | 1.741996234 |
| ENSG00000101670 | LIPG      | 0.616792953 | 1.741996234 |
| ENSG00000101868 | POLA1     | 0.616792953 | 1.741996234 |
| ENSG00000102001 | CACNA1F   | 0.616792953 | 1.741996234 |
| ENSG00000102575 | ACP5      | 0.616792953 | 1.741996234 |
| ENSG00000102796 | DHRS12    | 0.616792953 | 1.741996234 |
| ENSG00000103056 | SMPD3     | 0.616792953 | 1.741996234 |
| ENSG00000103222 | ABCC1     | 0.616792953 | 1.741996234 |
| ENSG00000103248 | MTHFSD    | 0.616792953 | 1.741996234 |
| ENSG00000103310 | ZP2       | 0.616792953 | 1.741996234 |
| ENSG00000103460 | TOX3      | 0.616792953 | 1.741996234 |
| ENSG00000103534 | TMC5      | 0.616792953 | 1.741996234 |
| ENSG00000104044 | OCA2      | 0.616792953 | 1.741996234 |
| ENSG00000104059 | FAM189A1  | 0.616792953 | 1.741996234 |
| ENSG00000104142 | VPS18     | 0.616792953 | 1.741996234 |
| ENSG00000104218 | CSPP1     | 0.616792953 | 1.741996234 |
| ENSG00000104325 | DECR1     | 0.616792953 | 1.741996234 |
| ENSG00000104524 | PYCRL     | 0.616792953 | 1.741996234 |
| ENSG00000104687 | GSR       | 0.616792953 | 1.741996234 |
| ENSG00000104808 | DHDH      | 0.616792953 | 1.741996234 |
| ENSG00000104833 | TUBB4A    | 0.616792953 | 1.741996234 |
| ENSG00000104879 | CKM       | 0.616792953 | 1.741996234 |

|                 |          |             |             |
|-----------------|----------|-------------|-------------|
| ENSG00000104880 | ARHGEF18 | 0.616792953 | 1.741996234 |
| ENSG00000104957 | CCDC130  | 0.616792953 | 1.741996234 |
| ENSG00000105122 | RASAL3   | 0.616792953 | 1.741996234 |
| ENSG00000105205 | CLC      | 0.616792953 | 1.741996234 |
| ENSG00000105281 | SLC1A5   | 0.616792953 | 1.741996234 |
| ENSG00000105928 | DFNA5    | 0.616792953 | 1.741996234 |
| ENSG00000106290 | TAF6     | 0.616792953 | 1.741996234 |
| ENSG00000106331 | PAX4     | 0.616792953 | 1.741996234 |
| ENSG00000106351 | AGFG2    | 0.616792953 | 1.741996234 |
| ENSG00000106397 | PLOD3    | 0.616792953 | 1.741996234 |
| ENSG00000106479 | ZNF862   | 0.616792953 | 1.741996234 |
| ENSG00000106524 | ANKMY2   | 0.616792953 | 1.741996234 |
| ENSG00000106976 | DNM1     | 0.616792953 | 1.741996234 |
| ENSG00000107077 | KDM4C    | 0.616792953 | 1.741996234 |
| ENSG00000107099 | DOCK8    | 0.616792953 | 1.741996234 |
| ENSG00000107719 | PALD1    | 0.616792953 | 1.741996234 |
| ENSG00000107731 | UNC5B    | 0.616792953 | 1.741996234 |
| ENSG00000107742 | SPOCK2   | 0.616792953 | 1.741996234 |
| ENSG00000107815 | C10orf2  | 0.616792953 | 1.741996234 |
| ENSG00000107819 | SFXN3    | 0.616792953 | 1.741996234 |
| ENSG00000107954 | NEURL1   | 0.616792953 | 1.741996234 |
| ENSG00000108312 | UBTF     | 0.616792953 | 1.741996234 |
| ENSG00000108582 | CPD      | 0.616792953 | 1.741996234 |
| ENSG00000108784 | NAGLU    | 0.616792953 | 1.741996234 |
| ENSG00000109072 | VTN      | 0.616792953 | 1.741996234 |
| ENSG00000109158 | GABRA4   | 0.616792953 | 1.741996234 |
| ENSG00000109667 | SLC2A9   | 0.616792953 | 1.741996234 |
| ENSG00000109684 | CLNK     | 0.616792953 | 1.741996234 |
| ENSG00000109851 | DBX1     | 0.616792953 | 1.741996234 |
| ENSG00000109911 | ELP4     | 0.616792953 | 1.741996234 |
| ENSG00000110011 | DNAJC4   | 0.616792953 | 1.741996234 |
| ENSG00000110237 | ARHGEF17 | 0.616792953 | 1.741996234 |
| ENSG00000110422 | HIPK3    | 0.616792953 | 1.741996234 |
| ENSG00000110435 | PDHX     | 0.616792953 | 1.741996234 |
| ENSG00000110583 | NAA40    | 0.616792953 | 1.741996234 |
| ENSG00000111229 | ARPC3    | 0.616792953 | 1.741996234 |
| ENSG00000111249 | CUX2     | 0.616792953 | 1.741996234 |
| ENSG00000112212 | TSPO2    | 0.616792953 | 1.741996234 |
| ENSG00000112303 | VNN2     | 0.616792953 | 1.741996234 |
| ENSG00000112414 | GPR126   | 0.616792953 | 1.741996234 |
| ENSG00000112486 | CCR6     | 0.616792953 | 1.741996234 |
| ENSG00000112562 | SMOC2    | 0.616792953 | 1.741996234 |
| ENSG00000112679 | DUSP22   | 0.616792953 | 1.741996234 |
| ENSG00000112773 | FAM46A   | 0.616792953 | 1.741996234 |
| ENSG00000112992 | NNT      | 0.616792953 | 1.741996234 |
| ENSG00000113119 | TMCO6    | 0.616792953 | 1.741996234 |
| ENSG00000113248 | PCDHB15  | 0.616792953 | 1.741996234 |

|                 |          |             |             |
|-----------------|----------|-------------|-------------|
| ENSG00000113302 | IL12B    | 0.616792953 | 1.741996234 |
| ENSG00000113569 | NUP155   | 0.616792953 | 1.741996234 |
| ENSG00000113600 | C9       | 0.616792953 | 1.741996234 |
| ENSG00000113811 | SELK     | 0.616792953 | 1.741996234 |
| ENSG00000114019 | AMOTL2   | 0.616792953 | 1.741996234 |
| ENSG00000114126 | TFDP2    | 0.616792953 | 1.741996234 |
| ENSG00000114331 | ACAP2    | 0.616792953 | 1.741996234 |
| ENSG00000114923 | SLC4A3   | 0.616792953 | 1.741996234 |
| ENSG00000115112 | TFCP2L1  | 0.616792953 | 1.741996234 |
| ENSG00000115232 | ITGA4    | 0.616792953 | 1.741996234 |
| ENSG00000115317 | HTRA2    | 0.616792953 | 1.741996234 |
| ENSG00000115353 | TACR1    | 0.616792953 | 1.741996234 |
| ENSG00000115661 | STK16    | 0.616792953 | 1.741996234 |
| ENSG00000115839 | RAB3GAP1 | 0.616792953 | 1.741996234 |
| ENSG00000116017 | ARID3A   | 0.616792953 | 1.741996234 |
| ENSG00000116198 | CEP104   | 0.616792953 | 1.741996234 |
| ENSG00000116497 | S100PBP  | 0.616792953 | 1.741996234 |
| ENSG00000116641 | DOCK7    | 0.616792953 | 1.741996234 |
| ENSG00000116774 | OLFML3   | 0.616792953 | 1.741996234 |
| ENSG00000116977 | LGALS8   | 0.616792953 | 1.741996234 |
| ENSG00000117118 | SDHB     | 0.616792953 | 1.741996234 |
| ENSG00000117280 | RAB7L1   | 0.616792953 | 1.741996234 |
| ENSG00000118242 | MREG     | 0.616792953 | 1.741996234 |
| ENSG00000118307 | CASC1    | 0.616792953 | 1.741996234 |
| ENSG00000118600 | TMEM5    | 0.616792953 | 1.741996234 |
| ENSG00000118960 | HS1BP3   | 0.616792953 | 1.741996234 |
| ENSG00000118965 | WDR35    | 0.616792953 | 1.741996234 |
| ENSG00000119004 | CYP20A1  | 0.616792953 | 1.741996234 |
| ENSG00000119041 | GTF3C3   | 0.616792953 | 1.741996234 |
| ENSG00000119147 | C2orf40  | 0.616792953 | 1.741996234 |
| ENSG00000119457 | SLC46A2  | 0.616792953 | 1.741996234 |
| ENSG00000120210 | INSL6    | 0.616792953 | 1.741996234 |
| ENSG00000120328 | PCDHB12  | 0.616792953 | 1.741996234 |
| ENSG00000120539 | MASTL    | 0.616792953 | 1.741996234 |
| ENSG00000120693 | SMAD9    | 0.616792953 | 1.741996234 |
| ENSG00000120784 | ZFP30    | 0.616792953 | 1.741996234 |
| ENSG00000121152 | NCAPH    | 0.616792953 | 1.741996234 |
| ENSG00000121236 | TRIM6    | 0.616792953 | 1.741996234 |
| ENSG00000121310 | ECHDC2   | 0.616792953 | 1.741996234 |
| ENSG00000122012 | SV2C     | 0.616792953 | 1.741996234 |
| ENSG00000122512 | PMS2     | 0.616792953 | 1.741996234 |
| ENSG00000122642 | FKBP9    | 0.616792953 | 1.741996234 |
| ENSG00000122718 | OR2S2    | 0.616792953 | 1.741996234 |
| ENSG00000123243 | ITIH5    | 0.616792953 | 1.741996234 |
| ENSG00000123338 | NCKAP1L  | 0.616792953 | 1.741996234 |
| ENSG00000123342 | MMP19    | 0.616792953 | 1.741996234 |
| ENSG00000123892 | RAB38    | 0.616792953 | 1.741996234 |

|                 |          |             |             |
|-----------------|----------|-------------|-------------|
| ENSG00000124159 | MATN4    | 0.616792953 | 1.741996234 |
| ENSG00000124160 | NCOA5    | 0.616792953 | 1.741996234 |
| ENSG00000124469 | CEACAM8  | 0.616792953 | 1.741996234 |
| ENSG00000124496 | TRERF1   | 0.616792953 | 1.741996234 |
| ENSG00000124568 | SLC17A1  | 0.616792953 | 1.741996234 |
| ENSG00000124587 | PEX6     | 0.616792953 | 1.741996234 |
| ENSG00000124784 | RIOK1    | 0.616792953 | 1.741996234 |
| ENSG00000124831 | LRRFIP1  | 0.616792953 | 1.741996234 |
| ENSG00000125319 | C17orf53 | 0.616792953 | 1.741996234 |
| ENSG00000125445 | MRPS7    | 0.616792953 | 1.741996234 |
| ENSG00000125810 | CD93     | 0.616792953 | 1.741996234 |
| ENSG00000126432 | PRDX5    | 0.616792953 | 1.741996234 |
| ENSG00000126500 | FLRT1    | 0.616792953 | 1.741996234 |
| ENSG00000126856 | PRDM7    | 0.616792953 | 1.741996234 |
| ENSG00000127948 | POR      | 0.616792953 | 1.741996234 |
| ENSG00000127980 | PEX1     | 0.616792953 | 1.741996234 |
| ENSG00000128268 | MGAT3    | 0.616792953 | 1.741996234 |
| ENSG00000128606 | LRRC17   | 0.616792953 | 1.741996234 |
| ENSG00000128923 | FAM63B   | 0.616792953 | 1.741996234 |
| ENSG00000129038 | LOXL1    | 0.616792953 | 1.741996234 |
| ENSG00000129450 | SIGLEC9  | 0.616792953 | 1.741996234 |
| ENSG00000129465 | RIPK3    | 0.616792953 | 1.741996234 |
| ENSG00000130052 | STARD8   | 0.616792953 | 1.741996234 |
| ENSG00000130147 | SH3BP4   | 0.616792953 | 1.741996234 |
| ENSG00000130175 | PRKCSH   | 0.616792953 | 1.741996234 |
| ENSG00000130300 | PLVAP    | 0.616792953 | 1.741996234 |
| ENSG00000130309 | COLGALT1 | 0.616792953 | 1.741996234 |
| ENSG00000130810 | PPAN     | 0.616792953 | 1.741996234 |
| ENSG00000130827 | PLXNA3   | 0.616792953 | 1.741996234 |
| ENSG00000130948 | HSD17B3  | 0.616792953 | 1.741996234 |
| ENSG00000131061 | ZNF341   | 0.616792953 | 1.741996234 |
| ENSG00000131233 | GJA9     | 0.616792953 | 1.741996234 |
| ENSG00000131355 | EMR3     | 0.616792953 | 1.741996234 |
| ENSG00000131374 | TBC1D5   | 0.616792953 | 1.741996234 |
| ENSG00000131381 | ZFYVE20  | 0.616792953 | 1.741996234 |
| ENSG00000131389 | SLC6A6   | 0.616792953 | 1.741996234 |
| ENSG00000131469 | RPL27    | 0.616792953 | 1.741996234 |
| ENSG00000131711 | MAP1B    | 0.616792953 | 1.741996234 |
| ENSG00000131771 | PPP1R1B  | 0.616792953 | 1.741996234 |
| ENSG00000132109 | TRIM21   | 0.616792953 | 1.741996234 |
| ENSG00000132139 | GAS2L2   | 0.616792953 | 1.741996234 |
| ENSG00000132205 | EMILIN2  | 0.616792953 | 1.741996234 |
| ENSG00000132313 | MRPL35   | 0.616792953 | 1.741996234 |
| ENSG00000132514 | CLEC10A  | 0.616792953 | 1.741996234 |
| ENSG00000132694 | ARHGEF11 | 0.616792953 | 1.741996234 |
| ENSG00000132746 | ALDH3B2  | 0.616792953 | 1.741996234 |
| ENSG00000132768 | DPH2     | 0.616792953 | 1.741996234 |

|                 |          |             |             |
|-----------------|----------|-------------|-------------|
| ENSG00000132824 | SERINC3  | 0.616792953 | 1.741996234 |
| ENSG00000133055 | MYBPH    | 0.616792953 | 1.741996234 |
| ENSG00000133138 | TBC1D8B  | 0.616792953 | 1.741996234 |
| ENSG00000133149 | TEX13A   | 0.616792953 | 1.741996234 |
| ENSG00000133193 | FAM104A  | 0.616792953 | 1.741996234 |
| ENSG00000133265 | HSPBP1   | 0.616792953 | 1.741996234 |
| ENSG00000133460 | SLC2A11  | 0.616792953 | 1.741996234 |
| ENSG00000133612 | AGAP3    | 0.616792953 | 1.741996234 |
| ENSG00000133636 | NTS      | 0.616792953 | 1.741996234 |
| ENSG00000133706 | LARS     | 0.616792953 | 1.741996234 |
| ENSG00000134077 | THUMPD3  | 0.616792953 | 1.741996234 |
| ENSG00000134186 | PRPF38B  | 0.616792953 | 1.741996234 |
| ENSG00000134398 | ERN2     | 0.616792953 | 1.741996234 |
| ENSG00000134444 | KIAA1468 | 0.616792953 | 1.741996234 |
| ENSG00000134508 | CABLES1  | 0.616792953 | 1.741996234 |
| ENSG00000134575 | ACP2     | 0.616792953 | 1.741996234 |
| ENSG00000134744 | ZCCHC11  | 0.616792953 | 1.741996234 |
| ENSG00000134827 | TCN1     | 0.616792953 | 1.741996234 |
| ENSG00000134853 | PDGFRA   | 0.616792953 | 1.741996234 |
| ENSG00000134874 | DZIP1    | 0.616792953 | 1.741996234 |
| ENSG00000135336 | ORC3     | 0.616792953 | 1.741996234 |
| ENSG00000135338 | LCA5     | 0.616792953 | 1.741996234 |
| ENSG00000135414 | GDF11    | 0.616792953 | 1.741996234 |
| ENSG00000135426 | TESPA1   | 0.616792953 | 1.741996234 |
| ENSG00000135577 | NMBR     | 0.616792953 | 1.741996234 |
| ENSG00000135702 | CHST5    | 0.616792953 | 1.741996234 |
| ENSG00000136021 | SCYL2    | 0.616792953 | 1.741996234 |
| ENSG00000136153 | LMO7     | 0.616792953 | 1.741996234 |
| ENSG00000136155 | SCEL     | 0.616792953 | 1.741996234 |
| ENSG00000136169 | SETDB2   | 0.616792953 | 1.741996234 |
| ENSG00000136273 | HUS1     | 0.616792953 | 1.741996234 |
| ENSG00000136492 | BRIP1    | 0.616792953 | 1.741996234 |
| ENSG00000136628 | EPRS     | 0.616792953 | 1.741996234 |
| ENSG00000136634 | IL10     | 0.616792953 | 1.741996234 |
| ENSG00000136715 | SAP130   | 0.616792953 | 1.741996234 |
| ENSG00000136872 | ALDOB    | 0.616792953 | 1.741996234 |
| ENSG00000136960 | ENPP2    | 0.616792953 | 1.741996234 |
| ENSG00000137055 | PLAA     | 0.616792953 | 1.741996234 |
| ENSG00000137193 | PIM1     | 0.616792953 | 1.741996234 |
| ENSG00000137200 | CMTR1    | 0.616792953 | 1.741996234 |
| ENSG00000137221 | TJAP1    | 0.616792953 | 1.741996234 |
| ENSG00000137252 | HCRTR2   | 0.616792953 | 1.741996234 |
| ENSG00000137275 | RIPK1    | 0.616792953 | 1.741996234 |
| ENSG00000137364 | TPMT     | 0.616792953 | 1.741996234 |
| ENSG00000137601 | NEK1     | 0.616792953 | 1.741996234 |
| ENSG00000137648 | TMPRSS4  | 0.616792953 | 1.741996234 |
| ENSG00000137656 | BUD13    | 0.616792953 | 1.741996234 |

|                 |          |             |             |
|-----------------|----------|-------------|-------------|
| ENSG00000137731 | FXYD2    | 0.616792953 | 1.741996234 |
| ENSG00000137760 | ALKBH8   | 0.616792953 | 1.741996234 |
| ENSG00000137806 | NDUFAF1  | 0.616792953 | 1.741996234 |
| ENSG00000137944 | CCBL2    | 0.616792953 | 1.741996234 |
| ENSG00000138068 | SULT6B1  | 0.616792953 | 1.741996234 |
| ENSG00000138092 | CENPO    | 0.616792953 | 1.741996234 |
| ENSG00000138433 | CIR1     | 0.616792953 | 1.741996234 |
| ENSG00000138483 | CCDC54   | 0.616792953 | 1.741996234 |
| ENSG00000138772 | ANXA3    | 0.616792953 | 1.741996234 |
| ENSG00000138785 | INTS12   | 0.616792953 | 1.741996234 |
| ENSG00000139160 | METTL20  | 0.616792953 | 1.741996234 |
| ENSG00000139168 | ZCRB1    | 0.616792953 | 1.741996234 |
| ENSG00000139209 | SLC38A4  | 0.616792953 | 1.741996234 |
| ENSG00000139505 | MTMR6    | 0.616792953 | 1.741996234 |
| ENSG00000139517 | LNX2     | 0.616792953 | 1.741996234 |
| ENSG00000139725 | RHOF     | 0.616792953 | 1.741996234 |
| ENSG00000139780 | METTL21C | 0.616792953 | 1.741996234 |
| ENSG00000139865 | TTC6     | 0.616792953 | 1.741996234 |
| ENSG00000140015 | KCNH5    | 0.616792953 | 1.741996234 |
| ENSG00000140265 | ZSCAN29  | 0.616792953 | 1.741996234 |
| ENSG00000140368 | PSTPIP1  | 0.616792953 | 1.741996234 |
| ENSG00000140396 | NCOA2    | 0.616792953 | 1.741996234 |
| ENSG00000140497 | SCAMP2   | 0.616792953 | 1.741996234 |
| ENSG00000140545 | MFGE8    | 0.616792953 | 1.741996234 |
| ENSG00000140829 | DHX38    | 0.616792953 | 1.741996234 |
| ENSG00000140854 | KATNB1   | 0.616792953 | 1.741996234 |
| ENSG00000140993 | TIGD7    | 0.616792953 | 1.741996234 |
| ENSG00000141012 | GALNS    | 0.616792953 | 1.741996234 |
| ENSG00000141255 | SPATA22  | 0.616792953 | 1.741996234 |
| ENSG00000141258 | SGSM2    | 0.616792953 | 1.741996234 |
| ENSG00000141298 | SSH2     | 0.616792953 | 1.741996234 |
| ENSG00000141519 | CCDC40   | 0.616792953 | 1.741996234 |
| ENSG00000141524 | TMC6     | 0.616792953 | 1.741996234 |
| ENSG00000141569 | TRIM65   | 0.616792953 | 1.741996234 |
| ENSG00000141664 | ZCCHC2   | 0.616792953 | 1.741996234 |
| ENSG00000141873 | SLC39A3  | 0.616792953 | 1.741996234 |
| ENSG00000142611 | PRDM16   | 0.616792953 | 1.741996234 |
| ENSG00000142871 | CYR61    | 0.616792953 | 1.741996234 |
| ENSG00000143164 | DCAF6    | 0.616792953 | 1.741996234 |
| ENSG00000143228 | NUF2     | 0.616792953 | 1.741996234 |
| ENSG00000143367 | TUFT1    | 0.616792953 | 1.741996234 |
| ENSG00000143376 | SNX27    | 0.616792953 | 1.741996234 |
| ENSG00000143412 | ANXA9    | 0.616792953 | 1.741996234 |
| ENSG00000143443 | C1orf56  | 0.616792953 | 1.741996234 |
| ENSG00000143772 | ITPKB    | 0.616792953 | 1.741996234 |
| ENSG00000143951 | WDPCP    | 0.616792953 | 1.741996234 |
| ENSG00000144031 | ANKRD53  | 0.616792953 | 1.741996234 |

|                 |                |             |             |
|-----------------|----------------|-------------|-------------|
| ENSG00000144035 | NAT8           | 0.616792953 | 1.741996234 |
| ENSG00000144369 | FAM171B        | 0.616792953 | 1.741996234 |
| ENSG00000144460 | NYAP2          | 0.616792953 | 1.741996234 |
| ENSG00000144619 | CNTN4          | 0.616792953 | 1.741996234 |
| ENSG00000144635 | DYNC1LI1       | 0.616792953 | 1.741996234 |
| ENSG00000144668 | ITGA9          | 0.616792953 | 1.741996234 |
| ENSG00000144671 | SLC22A14       | 0.616792953 | 1.741996234 |
| ENSG00000144674 | GOLGA4         | 0.616792953 | 1.741996234 |
| ENSG00000144747 | TMF1           | 0.616792953 | 1.741996234 |
| ENSG00000144749 | LRIG1          | 0.616792953 | 1.741996234 |
| ENSG00000144837 | PLA1A          | 0.616792953 | 1.741996234 |
| ENSG00000145428 | RNF175         | 0.616792953 | 1.741996234 |
| ENSG00000145431 | PDGFC          | 0.616792953 | 1.741996234 |
| ENSG00000145817 | YIPF5          | 0.616792953 | 1.741996234 |
| ENSG00000146094 | DOK3           | 0.616792953 | 1.741996234 |
| ENSG00000146192 | FGD2           | 0.616792953 | 1.741996234 |
| ENSG00000146205 | ANO7           | 0.616792953 | 1.741996234 |
| ENSG00000146535 | GNA12          | 0.616792953 | 1.741996234 |
| ENSG00000146826 | C7orf43        | 0.616792953 | 1.741996234 |
| ENSG00000146856 | AGBL3          | 0.616792953 | 1.741996234 |
| ENSG00000146963 | C7orf55-LUC7L2 | 0.616792953 | 1.741996234 |
| ENSG00000147130 | ZMYM3          | 0.616792953 | 1.741996234 |
| ENSG00000147573 | TRIM55         | 0.616792953 | 1.741996234 |
| ENSG00000147588 | PMP2           | 0.616792953 | 1.741996234 |
| ENSG00000147614 | ATP6V0D2       | 0.616792953 | 1.741996234 |
| ENSG00000147852 | VLDLR          | 0.616792953 | 1.741996234 |
| ENSG00000148225 | WDR31          | 0.616792953 | 1.741996234 |
| ENSG00000148288 | GBGT1          | 0.616792953 | 1.741996234 |
| ENSG00000148498 | PARD3          | 0.616792953 | 1.741996234 |
| ENSG00000148735 | PLEKHS1        | 0.616792953 | 1.741996234 |
| ENSG00000148840 | PPRC1          | 0.616792953 | 1.741996234 |
| ENSG00000149260 | CAPN5          | 0.616792953 | 1.741996234 |
| ENSG00000149452 | SLC22A8        | 0.616792953 | 1.741996234 |
| ENSG00000149506 | ZP1            | 0.616792953 | 1.741996234 |
| ENSG00000149743 | TRPT1          | 0.616792953 | 1.741996234 |
| ENSG00000149823 | VPS51          | 0.616792953 | 1.741996234 |
| ENSG00000150244 | TRIM48         | 0.616792953 | 1.741996234 |
| ENSG00000150275 | PCDH15         | 0.616792953 | 1.741996234 |
| ENSG00000150361 | KLHL1          | 0.616792953 | 1.741996234 |
| ENSG00000150628 | SPATA4         | 0.616792953 | 1.741996234 |
| ENSG00000150760 | DOCK1          | 0.616792953 | 1.741996234 |
| ENSG00000150776 | C11orf57       | 0.616792953 | 1.741996234 |
| ENSG00000151012 | SLC7A11        | 0.616792953 | 1.741996234 |
| ENSG00000151062 | CACNA2D4       | 0.616792953 | 1.741996234 |
| ENSG00000151240 | DIP2C          | 0.616792953 | 1.741996234 |
| ENSG00000151353 | TMEM18         | 0.616792953 | 1.741996234 |
| ENSG00000151445 | VIPAS39        | 0.616792953 | 1.741996234 |

|                 |          |             |             |
|-----------------|----------|-------------|-------------|
| ENSG00000151503 | NCAPD3   | 0.616792953 | 1.741996234 |
| ENSG00000151553 | FAM160B1 | 0.616792953 | 1.741996234 |
| ENSG00000151572 | ANO4     | 0.616792953 | 1.741996234 |
| ENSG00000151612 | ZNF827   | 0.616792953 | 1.741996234 |
| ENSG00000151655 | ITIH2    | 0.616792953 | 1.741996234 |
| ENSG00000151718 | WWC2     | 0.616792953 | 1.741996234 |
| ENSG00000152217 | SETBP1   | 0.616792953 | 1.741996234 |
| ENSG00000152291 | TGOLN2   | 0.616792953 | 1.741996234 |
| ENSG00000152454 | ZNF256   | 0.616792953 | 1.741996234 |
| ENSG00000152936 | IFLTD1   | 0.616792953 | 1.741996234 |
| ENSG00000153029 | MR1      | 0.616792953 | 1.741996234 |
| ENSG00000153071 | DAB2     | 0.616792953 | 1.741996234 |
| ENSG00000153233 | PTPRR    | 0.616792953 | 1.741996234 |
| ENSG00000153347 | FAM81B   | 0.616792953 | 1.741996234 |
| ENSG00000153721 | CNKSR3   | 0.616792953 | 1.741996234 |
| ENSG00000153832 | FBXO36   | 0.616792953 | 1.741996234 |
| ENSG00000154122 | ANKH     | 0.616792953 | 1.741996234 |
| ENSG00000154153 | FAM134B  | 0.616792953 | 1.741996234 |
| ENSG00000154165 | GPR15    | 0.616792953 | 1.741996234 |
| ENSG00000154227 | CERS3    | 0.616792953 | 1.741996234 |
| ENSG00000154252 | GAL3ST2  | 0.616792953 | 1.741996234 |
| ENSG00000155034 | FBXL18   | 0.616792953 | 1.741996234 |
| ENSG00000155087 | ODF1     | 0.616792953 | 1.741996234 |
| ENSG00000155363 | MOV10    | 0.616792953 | 1.741996234 |
| ENSG00000155897 | ADCY8    | 0.616792953 | 1.741996234 |
| ENSG00000155975 | VPS37A   | 0.616792953 | 1.741996234 |
| ENSG00000156042 | TTC18    | 0.616792953 | 1.741996234 |
| ENSG00000156049 | GNA14    | 0.616792953 | 1.741996234 |
| ENSG00000156232 | WHAMM    | 0.616792953 | 1.741996234 |
| ENSG00000156239 | N6AMT1   | 0.616792953 | 1.741996234 |
| ENSG00000156253 | RWDD2B   | 0.616792953 | 1.741996234 |
| ENSG00000156931 | VPS8     | 0.616792953 | 1.741996234 |
| ENSG00000157399 | ARSE     | 0.616792953 | 1.741996234 |
| ENSG00000157483 | MYO1E    | 0.616792953 | 1.741996234 |
| ENSG00000157637 | SLC38A10 | 0.616792953 | 1.741996234 |
| ENSG00000158113 | LRRC43   | 0.616792953 | 1.741996234 |
| ENSG00000158714 | SLAMF8   | 0.616792953 | 1.741996234 |
| ENSG00000158786 | PLA2G2F  | 0.616792953 | 1.741996234 |
| ENSG00000159339 | PADI4    | 0.616792953 | 1.741996234 |
| ENSG00000159403 | C1R      | 0.616792953 | 1.741996234 |
| ENSG00000159588 | CCDC17   | 0.616792953 | 1.741996234 |
| ENSG00000159625 | CCDC135  | 0.616792953 | 1.741996234 |
| ENSG00000159784 | FAM131B  | 0.616792953 | 1.741996234 |
| ENSG00000159961 | OR3A3    | 0.616792953 | 1.741996234 |
| ENSG00000160188 | RSPH1    | 0.616792953 | 1.741996234 |
| ENSG00000160783 | PMF1     | 0.616792953 | 1.741996234 |
| ENSG00000160813 | PPP1R35  | 0.616792953 | 1.741996234 |

|                 |          |             |             |
|-----------------|----------|-------------|-------------|
| ENSG00000160963 | COL26A1  | 0.616792953 | 1.741996234 |
| ENSG00000161010 | C5orf45  | 0.616792953 | 1.741996234 |
| ENSG00000161091 | MFSD12   | 0.616792953 | 1.741996234 |
| ENSG00000161249 | DMKN     | 0.616792953 | 1.741996234 |
| ENSG00000161618 | ALDH16A1 | 0.616792953 | 1.741996234 |
| ENSG00000161634 | DCD      | 0.616792953 | 1.741996234 |
| ENSG00000162290 | DCP1A    | 0.616792953 | 1.741996234 |
| ENSG00000162337 | LRP5     | 0.616792953 | 1.741996234 |
| ENSG00000162444 | RBP7     | 0.616792953 | 1.741996234 |
| ENSG00000162571 | TTLL10   | 0.616792953 | 1.741996234 |
| ENSG00000162643 | WDR63    | 0.616792953 | 1.741996234 |
| ENSG00000162692 | VCAM1    | 0.616792953 | 1.741996234 |
| ENSG00000162747 | FCGR3B   | 0.616792953 | 1.741996234 |
| ENSG00000162753 | SLC9C2   | 0.616792953 | 1.741996234 |
| ENSG00000162896 | PIGR     | 0.616792953 | 1.741996234 |
| ENSG00000162909 | CAPN2    | 0.616792953 | 1.741996234 |
| ENSG00000162951 | LRRTM1   | 0.616792953 | 1.741996234 |
| ENSG00000163159 | VPS72    | 0.616792953 | 1.741996234 |
| ENSG00000163217 | BMP10    | 0.616792953 | 1.741996234 |
| ENSG00000163293 | NIPAL1   | 0.616792953 | 1.741996234 |
| ENSG00000163322 | FAM175A  | 0.616792953 | 1.741996234 |
| ENSG00000163344 | PMVK     | 0.616792953 | 1.741996234 |
| ENSG00000163347 | CLDN1    | 0.616792953 | 1.741996234 |
| ENSG00000163376 | KBTBD8   | 0.616792953 | 1.741996234 |
| ENSG00000163568 | AIM2     | 0.616792953 | 1.741996234 |
| ENSG00000163590 | PPM1L    | 0.616792953 | 1.741996234 |
| ENSG00000163810 | TGM4     | 0.616792953 | 1.741996234 |
| ENSG00000163817 | SLC6A20  | 0.616792953 | 1.741996234 |
| ENSG00000163933 | RFT1     | 0.616792953 | 1.741996234 |
| ENSG00000163945 | UVSSA    | 0.616792953 | 1.741996234 |
| ENSG00000163956 | LRPAP1   | 0.616792953 | 1.741996234 |
| ENSG00000163958 | ZDHHC19  | 0.616792953 | 1.741996234 |
| ENSG00000164039 | BDH2     | 0.616792953 | 1.741996234 |
| ENSG00000164088 | PPM1M    | 0.616792953 | 1.741996234 |
| ENSG00000164256 | PRDM9    | 0.616792953 | 1.741996234 |
| ENSG00000164306 | PRIMPOL  | 0.616792953 | 1.741996234 |
| ENSG00000164347 | GFM2     | 0.616792953 | 1.741996234 |
| ENSG00000164363 | SLC6A18  | 0.616792953 | 1.741996234 |
| ENSG00000164542 | KIAA0895 | 0.616792953 | 1.741996234 |
| ENSG00000164597 | COG5     | 0.616792953 | 1.741996234 |
| ENSG00000164663 | USP49    | 0.616792953 | 1.741996234 |
| ENSG00000164821 | DEFA4    | 0.616792953 | 1.741996234 |
| ENSG00000165046 | LETM2    | 0.616792953 | 1.741996234 |
| ENSG00000165118 | C9orf64  | 0.616792953 | 1.741996234 |
| ENSG00000165131 | C7orf34  | 0.616792953 | 1.741996234 |
| ENSG00000165219 | GAPVD1   | 0.616792953 | 1.741996234 |
| ENSG00000165449 | SLC16A9  | 0.616792953 | 1.741996234 |

|                 |          |             |             |
|-----------------|----------|-------------|-------------|
| ENSG00000165457 | FOLR2    | 0.616792953 | 1.741996234 |
| ENSG00000165548 | TMEM63C  | 0.616792953 | 1.741996234 |
| ENSG00000165724 | ZMYND19  | 0.616792953 | 1.741996234 |
| ENSG00000165828 | PRAP1    | 0.616792953 | 1.741996234 |
| ENSG00000165887 | ANKRD2   | 0.616792953 | 1.741996234 |
| ENSG00000166140 | ZFYVE19  | 0.616792953 | 1.741996234 |
| ENSG00000166206 | GABRB3   | 0.616792953 | 1.741996234 |
| ENSG00000166250 | CLMP     | 0.616792953 | 1.741996234 |
| ENSG00000166268 | MYRFL    | 0.616792953 | 1.741996234 |
| ENSG00000166377 | ATP9B    | 0.616792953 | 1.741996234 |
| ENSG00000166455 | C16orf46 | 0.616792953 | 1.741996234 |
| ENSG00000166479 | TMX3     | 0.616792953 | 1.741996234 |
| ENSG00000167037 | SGSM1    | 0.616792953 | 1.741996234 |
| ENSG00000167302 | ENTHD2   | 0.616792953 | 1.741996234 |
| ENSG00000167383 | ZNF229   | 0.616792953 | 1.741996234 |
| ENSG00000167384 | ZNF180   | 0.616792953 | 1.741996234 |
| ENSG00000167600 | CYP2S1   | 0.616792953 | 1.741996234 |
| ENSG00000167701 | GPT      | 0.616792953 | 1.741996234 |
| ENSG00000167751 | KLK2     | 0.616792953 | 1.741996234 |
| ENSG00000167780 | SOAT2    | 0.616792953 | 1.741996234 |
| ENSG00000167858 | TEKT1    | 0.616792953 | 1.741996234 |
| ENSG00000167945 | PRR25    | 0.616792953 | 1.741996234 |
| ENSG00000167967 | E4F1     | 0.616792953 | 1.741996234 |
| ENSG00000168389 | MFSD2A   | 0.616792953 | 1.741996234 |
| ENSG00000168434 | COG7     | 0.616792953 | 1.741996234 |
| ENSG00000168476 | REEP4    | 0.616792953 | 1.741996234 |
| ENSG00000168646 | AXIN2    | 0.616792953 | 1.741996234 |
| ENSG00000168824 | NSG1     | 0.616792953 | 1.741996234 |
| ENSG00000168878 | SFTPB    | 0.616792953 | 1.741996234 |
| ENSG00000168938 | PPIC     | 0.616792953 | 1.741996234 |
| ENSG00000169071 | ROR2     | 0.616792953 | 1.741996234 |
| ENSG00000169155 | ZBTB43   | 0.616792953 | 1.741996234 |
| ENSG00000169224 | GCSAML   | 0.616792953 | 1.741996234 |
| ENSG00000169231 | THBS3    | 0.616792953 | 1.741996234 |
| ENSG00000169302 | STK32A   | 0.616792953 | 1.741996234 |
| ENSG00000169758 | C15orf27 | 0.616792953 | 1.741996234 |
| ENSG00000169836 | TACR3    | 0.616792953 | 1.741996234 |
| ENSG00000169851 | PCDH7    | 0.616792953 | 1.741996234 |
| ENSG00000170075 | GPR37L1  | 0.616792953 | 1.741996234 |
| ENSG00000170412 | GPRC5C   | 0.616792953 | 1.741996234 |
| ENSG00000170448 | NFXL1    | 0.616792953 | 1.741996234 |
| ENSG00000170615 | SLC26A5  | 0.616792953 | 1.741996234 |
| ENSG00000170954 | ZNF415   | 0.616792953 | 1.741996234 |
| ENSG00000171401 | KRT13    | 0.616792953 | 1.741996234 |
| ENSG00000171433 | GLOD5    | 0.616792953 | 1.741996234 |
| ENSG00000171723 | GPHN     | 0.616792953 | 1.741996234 |
| ENSG00000171759 | PAH      | 0.616792953 | 1.741996234 |

|                 |          |             |             |
|-----------------|----------|-------------|-------------|
| ENSG00000171942 | OR10H2   | 0.616792953 | 1.741996234 |
| ENSG00000172059 | KLF11    | 0.616792953 | 1.741996234 |
| ENSG00000172244 | C5orf34  | 0.616792953 | 1.741996234 |
| ENSG00000172289 | OR10V1   | 0.616792953 | 1.741996234 |
| ENSG00000172336 | POP7     | 0.616792953 | 1.741996234 |
| ENSG00000172382 | PRSS27   | 0.616792953 | 1.741996234 |
| ENSG00000172568 | FNDC9    | 0.616792953 | 1.741996234 |
| ENSG00000172733 | PURG     | 0.616792953 | 1.741996234 |
| ENSG00000172890 | NADSYN1  | 0.616792953 | 1.741996234 |
| ENSG00000172901 | AQPEP    | 0.616792953 | 1.741996234 |
| ENSG00000173166 | RAPH1    | 0.616792953 | 1.741996234 |
| ENSG00000173226 | IQCB1    | 0.616792953 | 1.741996234 |
| ENSG00000173276 | ZBTB21   | 0.616792953 | 1.741996234 |
| ENSG00000173914 | RBM4B    | 0.616792953 | 1.741996234 |
| ENSG00000174137 | FAM53A   | 0.616792953 | 1.741996234 |
| ENSG00000174946 | GPR171   | 0.616792953 | 1.741996234 |
| ENSG00000174989 | FBXW8    | 0.616792953 | 1.741996234 |
| ENSG00000174992 | ZG16     | 0.616792953 | 1.741996234 |
| ENSG00000175106 | TVP23C   | 0.616792953 | 1.741996234 |
| ENSG00000175221 | MED16    | 0.616792953 | 1.741996234 |
| ENSG00000175287 | PHYHD1   | 0.616792953 | 1.741996234 |
| ENSG00000175309 | PHYKPL   | 0.616792953 | 1.741996234 |
| ENSG00000175518 | UBQLNL   | 0.616792953 | 1.741996234 |
| ENSG00000175766 | EIF4E1B  | 0.616792953 | 1.741996234 |
| ENSG00000175854 | SWI5     | 0.616792953 | 1.741996234 |
| ENSG00000176256 | HMGB4    | 0.616792953 | 1.741996234 |
| ENSG00000176293 | ZNF135   | 0.616792953 | 1.741996234 |
| ENSG00000176623 | RMDN1    | 0.616792953 | 1.741996234 |
| ENSG00000176731 | C8orf59  | 0.616792953 | 1.741996234 |
| ENSG00000177200 | CHD9     | 0.616792953 | 1.741996234 |
| ENSG00000177225 | PDDC1    | 0.616792953 | 1.741996234 |
| ENSG00000177239 | MAN1B1   | 0.616792953 | 1.741996234 |
| ENSG00000177427 | MIEF2    | 0.616792953 | 1.741996234 |
| ENSG00000177453 | NIM1K    | 0.616792953 | 1.741996234 |
| ENSG00000177476 | OR2G3    | 0.616792953 | 1.741996234 |
| ENSG00000177707 | PVRL3    | 0.616792953 | 1.741996234 |
| ENSG00000177971 | IMP3     | 0.616792953 | 1.741996234 |
| ENSG00000178075 | GRAMD1C  | 0.616792953 | 1.741996234 |
| ENSG00000178726 | THBD     | 0.616792953 | 1.741996234 |
| ENSG00000178826 | TMEM139  | 0.616792953 | 1.741996234 |
| ENSG00000179010 | MRFAP1   | 0.616792953 | 1.741996234 |
| ENSG00000179163 | FUCA1    | 0.616792953 | 1.741996234 |
| ENSG00000179546 | HTR1D    | 0.616792953 | 1.741996234 |
| ENSG00000179817 | MRGPRX4  | 0.616792953 | 1.741996234 |
| ENSG00000179846 | NKPD1    | 0.616792953 | 1.741996234 |
| ENSG00000180116 | C12orf40 | 0.616792953 | 1.741996234 |
| ENSG00000180347 | CCDC129  | 0.616792953 | 1.741996234 |

|                 |            |             |             |
|-----------------|------------|-------------|-------------|
| ENSG00000180376 | CCDC66     | 0.616792953 | 1.741996234 |
| ENSG00000180475 | OR10Q1     | 0.616792953 | 1.741996234 |
| ENSG00000180532 | ZSCAN4     | 0.616792953 | 1.741996234 |
| ENSG00000180739 | S1PR5      | 0.616792953 | 1.741996234 |
| ENSG00000181195 | PENK       | 0.616792953 | 1.741996234 |
| ENSG00000181767 | OR8H2      | 0.616792953 | 1.741996234 |
| ENSG00000181781 | ODF3L2     | 0.616792953 | 1.741996234 |
| ENSG00000182150 | ERCC6L2    | 0.616792953 | 1.741996234 |
| ENSG00000182271 | TMIGD1     | 0.616792953 | 1.741996234 |
| ENSG00000182324 | KCNJ14     | 0.616792953 | 1.741996234 |
| ENSG00000182334 | OR5P3      | 0.616792953 | 1.741996234 |
| ENSG00000182606 | TRAK1      | 0.616792953 | 1.741996234 |
| ENSG00000182652 | OR4Q3      | 0.616792953 | 1.741996234 |
| ENSG00000182687 | GALR2      | 0.616792953 | 1.741996234 |
| ENSG00000182831 | C16orf72   | 0.616792953 | 1.741996234 |
| ENSG00000182854 | OR4F15     | 0.616792953 | 1.741996234 |
| ENSG00000183020 | AP2A2      | 0.616792953 | 1.741996234 |
| ENSG00000183034 | OTOP2      | 0.616792953 | 1.741996234 |
| ENSG00000183090 | FREM3      | 0.616792953 | 1.741996234 |
| ENSG00000183291 | SEP15      | 0.616792953 | 1.741996234 |
| ENSG00000183423 | LRIT3      | 0.616792953 | 1.741996234 |
| ENSG00000183470 | AC009365.3 | 0.616792953 | 1.741996234 |
| ENSG00000183625 | CCR3       | 0.616792953 | 1.741996234 |
| ENSG00000183631 | CXorf64    | 0.616792953 | 1.741996234 |
| ENSG00000183828 | NUDT14     | 0.616792953 | 1.741996234 |
| ENSG00000183853 | KIRREL     | 0.616792953 | 1.741996234 |
| ENSG00000183856 | IQGAP3     | 0.616792953 | 1.741996234 |
| ENSG00000183864 | TOB2       | 0.616792953 | 1.741996234 |
| ENSG00000184302 | SIX6       | 0.616792953 | 1.741996234 |
| ENSG00000184357 | HIST1H1B   | 0.616792953 | 1.741996234 |
| ENSG00000184374 | COLEC10    | 0.616792953 | 1.741996234 |
| ENSG00000184470 | TXNRD2     | 0.616792953 | 1.741996234 |
| ENSG00000184571 | PIWIL3     | 0.616792953 | 1.741996234 |
| ENSG00000184708 | EIF4ENIF1  | 0.616792953 | 1.741996234 |
| ENSG00000184860 | SDR42E1    | 0.616792953 | 1.741996234 |
| ENSG00000184886 | PIGW       | 0.616792953 | 1.741996234 |
| ENSG00000184939 | ZFP90      | 0.616792953 | 1.741996234 |
| ENSG00000185019 | UBOX5      | 0.616792953 | 1.741996234 |
| ENSG00000185278 | ZBTB37     | 0.616792953 | 1.741996234 |
| ENSG00000185290 | NUPR1L     | 0.616792953 | 1.741996234 |
| ENSG00000185298 | CCDC137    | 0.616792953 | 1.741996234 |
| ENSG00000185345 | PARK2      | 0.616792953 | 1.741996234 |
| ENSG00000185610 | DBX2       | 0.616792953 | 1.741996234 |
| ENSG00000185627 | PSMD13     | 0.616792953 | 1.741996234 |
| ENSG00000185753 | CXorf38    | 0.616792953 | 1.741996234 |
| ENSG00000185933 | CALHM1     | 0.616792953 | 1.741996234 |
| ENSG00000185974 | GRK1       | 0.616792953 | 1.741996234 |

|                 |          |             |             |
|-----------------|----------|-------------|-------------|
| ENSG00000185989 | RASA3    | 0.616792953 | 1.741996234 |
| ENSG00000186049 | KRT73    | 0.616792953 | 1.741996234 |
| ENSG00000186283 | TOR3A    | 0.616792953 | 1.741996234 |
| ENSG00000186417 | GLDN     | 0.616792953 | 1.741996234 |
| ENSG00000186654 | PRR5     | 0.616792953 | 1.741996234 |
| ENSG00000186812 | ZNF397   | 0.616792953 | 1.741996234 |
| ENSG00000186838 | SELV     | 0.616792953 | 1.741996234 |
| ENSG00000186868 | MAPT     | 0.616792953 | 1.741996234 |
| ENSG00000187003 | ACTL7A   | 0.616792953 | 1.741996234 |
| ENSG00000187048 | CYP4A11  | 0.616792953 | 1.741996234 |
| ENSG00000187391 | MAGI2    | 0.616792953 | 1.741996234 |
| ENSG00000187607 | ZNF286A  | 0.616792953 | 1.741996234 |
| ENSG00000187772 | LIN28B   | 0.616792953 | 1.741996234 |
| ENSG00000187796 | CARD9    | 0.616792953 | 1.741996234 |
| ENSG00000187824 | TMEM220  | 0.616792953 | 1.741996234 |
| ENSG00000188130 | MAPK12   | 0.616792953 | 1.741996234 |
| ENSG00000188293 | IGFL1    | 0.616792953 | 1.741996234 |
| ENSG00000188747 | NOXA1    | 0.616792953 | 1.741996234 |
| ENSG00000188782 | CATSPER4 | 0.616792953 | 1.741996234 |
| ENSG00000188994 | ZNF292   | 0.616792953 | 1.741996234 |
| ENSG00000189182 | KRT77    | 0.616792953 | 1.741996234 |
| ENSG00000196083 | IL1RAP   | 0.616792953 | 1.741996234 |
| ENSG00000196155 | PLEKHG4  | 0.616792953 | 1.741996234 |
| ENSG00000196391 | ZNF774   | 0.616792953 | 1.741996234 |
| ENSG00000196408 | NOXO1    | 0.616792953 | 1.741996234 |
| ENSG00000196415 | PRTN3    | 0.616792953 | 1.741996234 |
| ENSG00000196562 | SULF2    | 0.616792953 | 1.741996234 |
| ENSG00000196935 | SRGAP1   | 0.616792953 | 1.741996234 |
| ENSG00000196963 | PCDHB16  | 0.616792953 | 1.741996234 |
| ENSG00000197119 | SLC25A29 | 0.616792953 | 1.741996234 |
| ENSG00000197121 | PGAP1    | 0.616792953 | 1.741996234 |
| ENSG00000197375 | SLC22A5  | 0.616792953 | 1.741996234 |
| ENSG00000197429 | IPP      | 0.616792953 | 1.741996234 |
| ENSG00000197430 | OPALIN   | 0.616792953 | 1.741996234 |
| ENSG00000197603 | C5orf42  | 0.616792953 | 1.741996234 |
| ENSG00000197694 | SPTAN1   | 0.616792953 | 1.741996234 |
| ENSG00000197724 | PHF2     | 0.616792953 | 1.741996234 |
| ENSG00000197747 | S100A10  | 0.616792953 | 1.741996234 |
| ENSG00000197935 | ZNF311   | 0.616792953 | 1.741996234 |
| ENSG00000197948 | FCHSD1   | 0.616792953 | 1.741996234 |
| ENSG00000198028 | ZNF560   | 0.616792953 | 1.741996234 |
| ENSG00000198075 | SULT1C4  | 0.616792953 | 1.741996234 |
| ENSG00000198283 | OR5B21   | 0.616792953 | 1.741996234 |
| ENSG00000198315 | ZKSCAN8  | 0.616792953 | 1.741996234 |
| ENSG00000198556 | ZNF789   | 0.616792953 | 1.741996234 |
| ENSG00000198736 | MSRB1    | 0.616792953 | 1.741996234 |
| ENSG00000198858 | R3HDM4   | 0.616792953 | 1.741996234 |

|                 |                  |             |             |
|-----------------|------------------|-------------|-------------|
| ENSG00000198877 | OR5D13           | 0.616792953 | 1.741996234 |
| ENSG00000198952 | SMG5             | 0.616792953 | 1.741996234 |
| ENSG00000203697 | CAPN8            | 0.616792953 | 1.741996234 |
| ENSG00000203730 | TEDDM1           | 0.616792953 | 1.741996234 |
| ENSG00000203747 | FCGR3A           | 0.616792953 | 1.741996234 |
| ENSG00000203760 | CENPW            | 0.616792953 | 1.741996234 |
| ENSG00000204176 | SYT15            | 0.616792953 | 1.741996234 |
| ENSG00000204290 | BTNL2            | 0.616792953 | 1.741996234 |
| ENSG00000204352 | C9orf129         | 0.616792953 | 1.741996234 |
| ENSG00000204422 | XXbac-BPG32J3.20 | 0.616792953 | 1.741996234 |
| ENSG00000204463 | BAG6             | 0.616792953 | 1.741996234 |
| ENSG00000204859 | ZBTB48           | 0.616792953 | 1.741996234 |
| ENSG00000204978 | C19orf69         | 0.616792953 | 1.741996234 |
| ENSG00000205403 | CFI              | 0.616792953 | 1.741996234 |
| ENSG00000205669 | ACOT6            | 0.616792953 | 1.741996234 |
| ENSG00000205808 | PPAPDC2          | 0.616792953 | 1.741996234 |
| ENSG00000205883 | DEFB135          | 0.616792953 | 1.741996234 |
| ENSG00000205929 | C21orf62         | 0.616792953 | 1.741996234 |
| ENSG00000206181 | TCEB3B           | 0.616792953 | 1.741996234 |
| ENSG00000206203 | TSSK2            | 0.616792953 | 1.741996234 |
| ENSG00000206531 | CD200R1L         | 0.616792953 | 1.741996234 |
| ENSG00000211890 | IGHA2            | 0.616792953 | 1.741996234 |
| ENSG00000213079 | SCAF8            | 0.616792953 | 1.741996234 |
| ENSG00000213420 | GPC2             | 0.616792953 | 1.741996234 |
| ENSG00000213694 | S1PR3            | 0.616792953 | 1.741996234 |
| ENSG00000213906 | LTB4R2           | 0.616792953 | 1.741996234 |
| ENSG00000214013 | GANC             | 0.616792953 | 1.741996234 |
| ENSG00000214063 | TSPAN4           | 0.616792953 | 1.741996234 |
| ENSG00000214402 | LCNL1            | 0.616792953 | 1.741996234 |
| ENSG00000214513 | NOTO             | 0.616792953 | 1.741996234 |
| ENSG00000214929 | SPATA31D1        | 0.616792953 | 1.741996234 |
| ENSG00000215009 | ACSM4            | 0.616792953 | 1.741996234 |
| ENSG00000215217 | C5orf49          | 0.616792953 | 1.741996234 |
| ENSG00000215910 | C1orf167         | 0.616792953 | 1.741996234 |
| ENSG00000216490 | IFI30            | 0.616792953 | 1.741996234 |
| ENSG00000221819 | C16orf3          | 0.616792953 | 1.741996234 |
| ENSG00000221909 | FAM200A          | 0.616792953 | 1.741996234 |
| ENSG00000221995 | TIAF1            | 0.616792953 | 1.741996234 |
| ENSG00000223501 | VPS52            | 0.616792953 | 1.741996234 |
| ENSG00000223601 | EBLN1            | 0.616792953 | 1.741996234 |
| ENSG00000224383 | C17orf72         | 0.616792953 | 1.741996234 |
| ENSG00000225614 | ZNF469           | 0.616792953 | 1.741996234 |
| ENSG00000226761 | TAS2R46          | 0.616792953 | 1.741996234 |
| ENSG00000227124 | ZNF717           | 0.616792953 | 1.741996234 |
| ENSG00000228835 | AC012123.1       | 0.616792953 | 1.741996234 |
| ENSG00000231925 | TAPBP            | 0.616792953 | 1.741996234 |
| ENSG00000232810 | TNF              | 0.616792953 | 1.741996234 |

|                 |               |             |             |
|-----------------|---------------|-------------|-------------|
| ENSG00000236311 | TLX1NB        | 0.616792953 | 1.741996234 |
| ENSG00000236609 | ZNF853        | 0.616792953 | 1.741996234 |
| ENSG00000237172 | B3GNT9        | 0.616792953 | 1.741996234 |
| ENSG00000241128 | OR14A2        | 0.616792953 | 1.741996234 |
| ENSG00000241404 | EGFL8         | 0.616792953 | 1.741996234 |
| ENSG00000242107 | LINC01100     | 0.616792953 | 1.741996234 |
| ENSG00000243137 | PSG4          | 0.616792953 | 1.741996234 |
| ENSG00000243207 | PPAN-P2RY11   | 0.616792953 | 1.741996234 |
| ENSG00000243244 | STON1         | 0.616792953 | 1.741996234 |
| ENSG00000243317 | C7orf73       | 0.616792953 | 1.741996234 |
| ENSG00000243749 | ZMYM6NB       | 0.616792953 | 1.741996234 |
| ENSG00000244734 | HBB           | 0.616792953 | 1.741996234 |
| ENSG00000248712 | CCDC153       | 0.616792953 | 1.741996234 |
| ENSG00000249034 | AC005609.1    | 0.616792953 | 1.741996234 |
| ENSG00000249139 | EPPIN-WFDC6   | 0.616792953 | 1.741996234 |
| ENSG00000251369 | ZNF550        | 0.616792953 | 1.741996234 |
| ENSG00000253305 | PCDHGB6       | 0.616792953 | 1.741996234 |
| ENSG00000253537 | PCDHGA7       | 0.616792953 | 1.741996234 |
| ENSG00000253797 | UTP14C        | 0.616792953 | 1.741996234 |
| ENSG00000254093 | PINX1         | 0.616792953 | 1.741996234 |
| ENSG00000255552 | LY6G6E        | 0.616792953 | 1.741996234 |
| ENSG00000256683 | ZNF350        | 0.616792953 | 1.741996234 |
| ENSG00000257923 | CUX1          | 0.616792953 | 1.741996234 |
| ENSG00000258817 | OR4C13        | 0.616792953 | 1.741996234 |
| ENSG00000258818 | RNASE4        | 0.616792953 | 1.741996234 |
| ENSG00000258890 | CEP95         | 0.616792953 | 1.741996234 |
| ENSG00000259316 | CTD-2116N17.1 | 0.616792953 | 1.741996234 |
| ENSG00000260238 | PMF1-BGLAP    | 0.616792953 | 1.741996234 |
| ENSG00000262209 | PCDHGB3       | 0.616792953 | 1.741996234 |
| ENSG00000264424 | MYH4          | 0.616792953 | 1.741996234 |
| ENSG00000266964 | FXYD1         | 0.616792953 | 1.741996234 |
| ENSG00000269955 | LUC7L2        | 0.616792953 | 1.741996234 |
| ENSG00000272658 | LTB4R2        | 0.616792953 | 1.741996234 |
| ENSG00000006118 | TMEM132A      | 0.621050809 | 0.433359936 |
| ENSG00000009335 | UBE3C         | 0.621050809 | 0.433359936 |
| ENSG00000012822 | CALCOCO1      | 0.621050809 | 0.433359936 |
| ENSG00000048028 | USP28         | 0.621050809 | 0.433359936 |
| ENSG00000050426 | LETMD1        | 0.621050809 | 0.433359936 |
| ENSG00000066279 | ASPM          | 0.621050809 | 0.433359936 |
| ENSG00000073910 | FRY           | 0.621050809 | 0.433359936 |
| ENSG00000074181 | NOTCH3        | 0.621050809 | 0.433359936 |
| ENSG00000075292 | ZNF638        | 0.621050809 | 0.433359936 |
| ENSG00000078618 | NRD1          | 0.621050809 | 0.433359936 |
| ENSG00000083842 | ZNF8          | 0.621050809 | 0.433359936 |
| ENSG00000088305 | DNMT3B        | 0.621050809 | 0.433359936 |
| ENSG00000091622 | PITPNM3       | 0.621050809 | 0.433359936 |
| ENSG00000092470 | WDR76         | 0.621050809 | 0.433359936 |

|                 |          |             |             |
|-----------------|----------|-------------|-------------|
| ENSG00000099769 | IGFALS   | 0.621050809 | 0.433359936 |
| ENSG00000099954 | CECR2    | 0.621050809 | 0.433359936 |
| ENSG00000100350 | FOXRED2  | 0.621050809 | 0.433359936 |
| ENSG00000100908 | EMC9     | 0.621050809 | 0.433359936 |
| ENSG00000103047 | TANGO6   | 0.621050809 | 0.433359936 |
| ENSG00000104738 | MCM4     | 0.621050809 | 0.433359936 |
| ENSG00000105819 | PMPCB    | 0.621050809 | 0.433359936 |
| ENSG00000105976 | MET      | 0.621050809 | 0.433359936 |
| ENSG00000106266 | SNX8     | 0.621050809 | 0.433359936 |
| ENSG00000108559 | NUP88    | 0.621050809 | 0.433359936 |
| ENSG00000109182 | CWH43    | 0.621050809 | 0.433359936 |
| ENSG00000110497 | AMBRA1   | 0.621050809 | 0.433359936 |
| ENSG00000110811 | LEPREL2  | 0.621050809 | 0.433359936 |
| ENSG00000111241 | FGF6     | 0.621050809 | 0.433359936 |
| ENSG00000112379 | KIAA1244 | 0.621050809 | 0.433359936 |
| ENSG00000114439 | BBX      | 0.621050809 | 0.433359936 |
| ENSG00000114455 | HHLA2    | 0.621050809 | 0.433359936 |
| ENSG00000114670 | NEK11    | 0.621050809 | 0.433359936 |
| ENSG00000116957 | TBCE     | 0.621050809 | 0.433359936 |
| ENSG00000121101 | TEX14    | 0.621050809 | 0.433359936 |
| ENSG00000124177 | CHD6     | 0.621050809 | 0.433359936 |
| ENSG00000126814 | TRMT5    | 0.621050809 | 0.433359936 |
| ENSG00000129467 | ADCY4    | 0.621050809 | 0.433359936 |
| ENSG00000131373 | HACL1    | 0.621050809 | 0.433359936 |
| ENSG00000132874 | SLC14A2  | 0.621050809 | 0.433359936 |
| ENSG00000134007 | ADAM20   | 0.621050809 | 0.433359936 |
| ENSG00000134249 | ADAM30   | 0.621050809 | 0.433359936 |
| ENSG00000134571 | MYBPC3   | 0.621050809 | 0.433359936 |
| ENSG00000135218 | CD36     | 0.621050809 | 0.433359936 |
| ENSG00000135407 | AVIL     | 0.621050809 | 0.433359936 |
| ENSG00000135912 | TTL4     | 0.621050809 | 0.433359936 |
| ENSG00000136002 | ARHGEF4  | 0.621050809 | 0.433359936 |
| ENSG00000136143 | SUCLA2   | 0.621050809 | 0.433359936 |
| ENSG00000138079 | SLC3A1   | 0.621050809 | 0.433359936 |
| ENSG00000138190 | EXOC6    | 0.621050809 | 0.433359936 |
| ENSG00000142528 | ZNF473   | 0.621050809 | 0.433359936 |
| ENSG00000142599 | RERE     | 0.621050809 | 0.433359936 |
| ENSG00000145868 | FBXO38   | 0.621050809 | 0.433359936 |
| ENSG00000146842 | TMEM209  | 0.621050809 | 0.433359936 |
| ENSG00000149201 | CCDC81   | 0.621050809 | 0.433359936 |
| ENSG00000150076 | C10ORF68 | 0.621050809 | 0.433359936 |
| ENSG00000152939 | MARVELD2 | 0.621050809 | 0.433359936 |
| ENSG00000152990 | GPR125   | 0.621050809 | 0.433359936 |
| ENSG00000154914 | USP43    | 0.621050809 | 0.433359936 |
| ENSG00000155367 | PPM1J    | 0.621050809 | 0.433359936 |
| ENSG00000155719 | OTOA     | 0.621050809 | 0.433359936 |
| ENSG00000156711 | MAPK13   | 0.621050809 | 0.433359936 |

|                 |          |             |             |
|-----------------|----------|-------------|-------------|
| ENSG00000157131 | C8A      | 0.621050809 | 0.433359936 |
| ENSG00000159267 | HLCS     | 0.621050809 | 0.433359936 |
| ENSG00000160703 | NLRX1    | 0.621050809 | 0.433359936 |
| ENSG00000162148 | PPP1R32  | 0.621050809 | 0.433359936 |
| ENSG00000162779 | AXDND1   | 0.621050809 | 0.433359936 |
| ENSG00000163482 | STK36    | 0.621050809 | 0.433359936 |
| ENSG00000163697 | APBB2    | 0.621050809 | 0.433359936 |
| ENSG00000164080 | RAD54L2  | 0.621050809 | 0.433359936 |
| ENSG00000164893 | SLC7A13  | 0.621050809 | 0.433359936 |
| ENSG00000164953 | TMEM67   | 0.621050809 | 0.433359936 |
| ENSG00000165238 | WNK2     | 0.621050809 | 0.433359936 |
| ENSG00000165943 | MOAP1    | 0.621050809 | 0.433359936 |
| ENSG00000167700 | MFSD3    | 0.621050809 | 0.433359936 |
| ENSG00000168096 | ANKS3    | 0.621050809 | 0.433359936 |
| ENSG00000168487 | BMP1     | 0.621050809 | 0.433359936 |
| ENSG00000168575 | SLC20A2  | 0.621050809 | 0.433359936 |
| ENSG00000168658 | VWA3B    | 0.621050809 | 0.433359936 |
| ENSG00000168676 | KCTD19   | 0.621050809 | 0.433359936 |
| ENSG00000168685 | IL7R     | 0.621050809 | 0.433359936 |
| ENSG00000171487 | NLRP5    | 0.621050809 | 0.433359936 |
| ENSG00000173769 | TOPAZ1   | 0.621050809 | 0.433359936 |
| ENSG00000173889 | PHC3     | 0.621050809 | 0.433359936 |
| ENSG00000174083 | PIK3R6   | 0.621050809 | 0.433359936 |
| ENSG00000174130 | TLR6     | 0.621050809 | 0.433359936 |
| ENSG00000174175 | SELP     | 0.621050809 | 0.433359936 |
| ENSG00000176601 | MAP3K19  | 0.621050809 | 0.433359936 |
| ENSG00000178279 | TNP2     | 0.621050809 | 0.433359936 |
| ENSG00000181790 | BAI1     | 0.621050809 | 0.433359936 |
| ENSG00000182253 | SYNM     | 0.621050809 | 0.433359936 |
| ENSG00000183035 | CYLC1    | 0.621050809 | 0.433359936 |
| ENSG00000184305 | CCSER1   | 0.621050809 | 0.433359936 |
| ENSG00000184698 | OR51M1   | 0.621050809 | 0.433359936 |
| ENSG00000185246 | PRPF39   | 0.621050809 | 0.433359936 |
| ENSG00000185504 | C17orf70 | 0.621050809 | 0.433359936 |
| ENSG00000187605 | TET3     | 0.621050809 | 0.433359936 |
| ENSG00000196943 | NOP9     | 0.621050809 | 0.433359936 |
| ENSG00000197586 | ENTPD6   | 0.621050809 | 0.433359936 |
| ENSG00000204348 | DXO      | 0.621050809 | 0.433359936 |
| ENSG00000204396 | VWA7     | 0.621050809 | 0.433359936 |
| ENSG00000214706 | IFRD2    | 0.621050809 | 0.433359936 |
| ENSG00000215305 | VPS16    | 0.621050809 | 0.433359936 |
| ENSG00000273439 | ZNF8     | 0.621050809 | 0.433359936 |
| ENSG00000087303 | NID2     | 0.625644343 | 1.31202046  |
| ENSG00000167978 | SRRM2    | 0.640527795 | 1.286660046 |
| ENSG00000005810 | MYCBP2   | 0.678916421 | 1.464       |
| ENSG00000009694 | TENM1    | 0.678916421 | 1.464       |
| ENSG00000010379 | SLC6A13  | 0.678916421 | 1.464       |

|                 |         |             |       |
|-----------------|---------|-------------|-------|
| ENSG00000011566 | MAP4K3  | 0.678916421 | 1.464 |
| ENSG00000023839 | ABCC2   | 0.678916421 | 1.464 |
| ENSG00000034053 | APBA2   | 0.678916421 | 1.464 |
| ENSG00000041515 | MYO16   | 0.678916421 | 1.464 |
| ENSG00000047346 | FAM214A | 0.678916421 | 1.464 |
| ENSG00000048707 | VPS13D  | 0.678916421 | 1.464 |
| ENSG00000051128 | HOMER3  | 0.678916421 | 1.464 |
| ENSG00000054967 | RELT    | 0.678916421 | 1.464 |
| ENSG00000066056 | TIE1    | 0.678916421 | 1.464 |
| ENSG00000066405 | CLDN18  | 0.678916421 | 1.464 |
| ENSG00000066735 | KIF26A  | 0.678916421 | 1.464 |
| ENSG00000067113 | PPAP2A  | 0.678916421 | 1.464 |
| ENSG00000067704 | IARS2   | 0.678916421 | 1.464 |
| ENSG00000069020 | MAST4   | 0.678916421 | 1.464 |
| ENSG00000069188 | SDK2    | 0.678916421 | 1.464 |
| ENSG00000070601 | FRMPD1  | 0.678916421 | 1.464 |
| ENSG00000070915 | SLC12A3 | 0.678916421 | 1.464 |
| ENSG00000071909 | MYO3B   | 0.678916421 | 1.464 |
| ENSG00000073605 | GSDMB   | 0.678916421 | 1.464 |
| ENSG00000073754 | CD5L    | 0.678916421 | 1.464 |
| ENSG00000075223 | SEMA3C  | 0.678916421 | 1.464 |
| ENSG00000081923 | ATP8B1  | 0.678916421 | 1.464 |
| ENSG00000084636 | COL16A1 | 0.678916421 | 1.464 |
| ENSG00000087206 | UIMC1   | 0.678916421 | 1.464 |
| ENSG00000088538 | DOCK3   | 0.678916421 | 1.464 |
| ENSG00000089597 | GANAB   | 0.678916421 | 1.464 |
| ENSG00000091490 | SEL1L3  | 0.678916421 | 1.464 |
| ENSG00000092098 | RNF31   | 0.678916421 | 1.464 |
| ENSG00000095303 | PTGS1   | 0.678916421 | 1.464 |
| ENSG00000095319 | NUP188  | 0.678916421 | 1.464 |
| ENSG00000095587 | TLL2    | 0.678916421 | 1.464 |
| ENSG00000095637 | SORBS1  | 0.678916421 | 1.464 |
| ENSG00000095981 | KCNK16  | 0.678916421 | 1.464 |
| ENSG00000096968 | JAK2    | 0.678916421 | 1.464 |
| ENSG00000097096 | SYDE2   | 0.678916421 | 1.464 |
| ENSG00000099814 | CEP170B | 0.678916421 | 1.464 |
| ENSG00000100290 | BIK     | 0.678916421 | 1.464 |
| ENSG00000100842 | EFS     | 0.678916421 | 1.464 |
| ENSG00000101004 | NINL    | 0.678916421 | 1.464 |
| ENSG00000101349 | PAK7    | 0.678916421 | 1.464 |
| ENSG00000102606 | ARHGEF7 | 0.678916421 | 1.464 |
| ENSG00000103042 | SLC38A7 | 0.678916421 | 1.464 |
| ENSG00000103227 | LMF1    | 0.678916421 | 1.464 |
| ENSG00000103995 | CEP152  | 0.678916421 | 1.464 |
| ENSG00000104731 | KLHDC4  | 0.678916421 | 1.464 |
| ENSG00000105227 | PRX     | 0.678916421 | 1.464 |
| ENSG00000105486 | LIG1    | 0.678916421 | 1.464 |

|                 |          |             |       |
|-----------------|----------|-------------|-------|
| ENSG00000108384 | RAD51C   | 0.678916421 | 1.464 |
| ENSG00000110448 | CD5      | 0.678916421 | 1.464 |
| ENSG00000110841 | PPFIBP1  | 0.678916421 | 1.464 |
| ENSG00000110934 | BIN2     | 0.678916421 | 1.464 |
| ENSG00000111266 | DUSP16   | 0.678916421 | 1.464 |
| ENSG00000112038 | OPRM1    | 0.678916421 | 1.464 |
| ENSG00000113108 | APBB3    | 0.678916421 | 1.464 |
| ENSG00000113211 | PCDHB6   | 0.678916421 | 1.464 |
| ENSG00000113360 | DROSHA   | 0.678916421 | 1.464 |
| ENSG00000113719 | ERGIC1   | 0.678916421 | 1.464 |
| ENSG00000114948 | ADAM23   | 0.678916421 | 1.464 |
| ENSG00000115020 | PIKFYVE  | 0.678916421 | 1.464 |
| ENSG00000115616 | SLC9A2   | 0.678916421 | 1.464 |
| ENSG00000116539 | ASH1L    | 0.678916421 | 1.464 |
| ENSG00000116882 | HAO2     | 0.678916421 | 1.464 |
| ENSG00000116984 | MTR      | 0.678916421 | 1.464 |
| ENSG00000117151 | CTBS     | 0.678916421 | 1.464 |
| ENSG00000118058 | KMT2A    | 0.678916421 | 1.464 |
| ENSG00000119535 | CSF3R    | 0.678916421 | 1.464 |
| ENSG00000119599 | DCAF4    | 0.678916421 | 1.464 |
| ENSG00000119681 | LTBP2    | 0.678916421 | 1.464 |
| ENSG00000119682 | AREL1    | 0.678916421 | 1.464 |
| ENSG00000119899 | SLC17A5  | 0.678916421 | 1.464 |
| ENSG00000120802 | TMPO     | 0.678916421 | 1.464 |
| ENSG00000121903 | ZSCAN20  | 0.678916421 | 1.464 |
| ENSG00000122180 | MYOG     | 0.678916421 | 1.464 |
| ENSG00000123143 | PKN1     | 0.678916421 | 1.464 |
| ENSG00000123427 | METTL21B | 0.678916421 | 1.464 |
| ENSG00000124782 | RREB1    | 0.678916421 | 1.464 |
| ENSG00000125703 | ATG4C    | 0.678916421 | 1.464 |
| ENSG00000125731 | SH2D3A   | 0.678916421 | 1.464 |
| ENSG00000126464 | PRR12    | 0.678916421 | 1.464 |
| ENSG00000127511 | SIN3B    | 0.678916421 | 1.464 |
| ENSG00000127666 | TICAM1   | 0.678916421 | 1.464 |
| ENSG00000128487 | SPECC1   | 0.678916421 | 1.464 |
| ENSG00000129221 | AIPL1    | 0.678916421 | 1.464 |
| ENSG00000130226 | DPP6     | 0.678916421 | 1.464 |
| ENSG00000130270 | ATP8B3   | 0.678916421 | 1.464 |
| ENSG00000130363 | RSPH3    | 0.678916421 | 1.464 |
| ENSG00000130529 | TRPM4    | 0.678916421 | 1.464 |
| ENSG00000130561 | SAG      | 0.678916421 | 1.464 |
| ENSG00000130957 | FBP2     | 0.678916421 | 1.464 |
| ENSG00000131778 | CHD1L    | 0.678916421 | 1.464 |
| ENSG00000132972 | RNF17    | 0.678916421 | 1.464 |
| ENSG00000133812 | SBF2     | 0.678916421 | 1.464 |
| ENSG00000134070 | IRAK2    | 0.678916421 | 1.464 |
| ENSG00000134755 | DSC2     | 0.678916421 | 1.464 |

|                 |             |             |       |
|-----------------|-------------|-------------|-------|
| ENSG00000134982 | APC         | 0.678916421 | 1.464 |
| ENSG00000135424 | ITGA7       | 0.678916421 | 1.464 |
| ENSG00000136573 | BLK         | 0.678916421 | 1.464 |
| ENSG00000136643 | RPS6KC1     | 0.678916421 | 1.464 |
| ENSG00000137802 | MAPKBP1     | 0.678916421 | 1.464 |
| ENSG00000138735 | PDE5A       | 0.678916421 | 1.464 |
| ENSG00000139626 | ITGB7       | 0.678916421 | 1.464 |
| ENSG00000139737 | SLAIN1      | 0.678916421 | 1.464 |
| ENSG00000139842 | CUL4A       | 0.678916421 | 1.464 |
| ENSG00000140443 | IGF1R       | 0.678916421 | 1.464 |
| ENSG00000140459 | CYP11A1     | 0.678916421 | 1.464 |
| ENSG00000140718 | FTO         | 0.678916421 | 1.464 |
| ENSG00000140853 | NLRC5       | 0.678916421 | 1.464 |
| ENSG00000141738 | GRB7        | 0.678916421 | 1.464 |
| ENSG00000142731 | PLK4        | 0.678916421 | 1.464 |
| ENSG00000144407 | PTH2R       | 0.678916421 | 1.464 |
| ENSG00000144959 | NCEH1       | 0.678916421 | 1.464 |
| ENSG00000146242 | TPBG        | 0.678916421 | 1.464 |
| ENSG00000146426 | TIAM2       | 0.678916421 | 1.464 |
| ENSG00000147041 | SYTL5       | 0.678916421 | 1.464 |
| ENSG00000147118 | ZNF182      | 0.678916421 | 1.464 |
| ENSG00000147606 | SLC26A7     | 0.678916421 | 1.464 |
| ENSG00000148296 | SURF6       | 0.678916421 | 1.464 |
| ENSG00000148343 | FAM73B      | 0.678916421 | 1.464 |
| ENSG00000148584 | A1CF        | 0.678916421 | 1.464 |
| ENSG00000148948 | LRRC4C      | 0.678916421 | 1.464 |
| ENSG00000149179 | C11orf49    | 0.678916421 | 1.464 |
| ENSG00000151892 | GFRA1       | 0.678916421 | 1.464 |
| ENSG00000152591 | DSPP        | 0.678916421 | 1.464 |
| ENSG00000153237 | CCDC148     | 0.678916421 | 1.464 |
| ENSG00000153575 | TUBGCP5     | 0.678916421 | 1.464 |
| ENSG00000154274 | C4orf19     | 0.678916421 | 1.464 |
| ENSG00000154556 | SORBS2      | 0.678916421 | 1.464 |
| ENSG00000155846 | PPARGC1B    | 0.678916421 | 1.464 |
| ENSG00000157005 | SST         | 0.678916421 | 1.464 |
| ENSG00000157654 | PALM2-AKAP2 | 0.678916421 | 1.464 |
| ENSG00000158079 | PTPDC1      | 0.678916421 | 1.464 |
| ENSG00000160049 | DFFA        | 0.678916421 | 1.464 |
| ENSG00000160994 | CCDC105     | 0.678916421 | 1.464 |
| ENSG00000161328 | LRRC56      | 0.678916421 | 1.464 |
| ENSG00000161860 | SYCE2       | 0.678916421 | 1.464 |
| ENSG00000162391 | FAM151A     | 0.678916421 | 1.464 |
| ENSG00000162813 | BPNT1       | 0.678916421 | 1.464 |
| ENSG00000162998 | FRZB        | 0.678916421 | 1.464 |
| ENSG00000163520 | FBLN2       | 0.678916421 | 1.464 |
| ENSG00000163611 | SPICE1      | 0.678916421 | 1.464 |
| ENSG00000163751 | CPA3        | 0.678916421 | 1.464 |

|                 |               |             |       |
|-----------------|---------------|-------------|-------|
| ENSG00000163913 | IFT122        | 0.678916421 | 1.464 |
| ENSG00000164047 | CAMP          | 0.678916421 | 1.464 |
| ENSG00000164299 | SPZ1          | 0.678916421 | 1.464 |
| ENSG00000164692 | COL1A2        | 0.678916421 | 1.464 |
| ENSG00000165388 | ZNF488        | 0.678916421 | 1.464 |
| ENSG00000165805 | C12orf50      | 0.678916421 | 1.464 |
| ENSG00000165973 | NELL1         | 0.678916421 | 1.464 |
| ENSG00000166091 | CMTM5         | 0.678916421 | 1.464 |
| ENSG00000166762 | CATSPER2      | 0.678916421 | 1.464 |
| ENSG00000166828 | SCNN1G        | 0.678916421 | 1.464 |
| ENSG00000167077 | MEI1          | 0.678916421 | 1.464 |
| ENSG00000167716 | WDR81         | 0.678916421 | 1.464 |
| ENSG00000167971 | CASKIN1       | 0.678916421 | 1.464 |
| ENSG00000168297 | PXK           | 0.678916421 | 1.464 |
| ENSG00000168394 | TAP1          | 0.678916421 | 1.464 |
| ENSG00000168447 | SCNN1B        | 0.678916421 | 1.464 |
| ENSG00000168619 | ADAM18        | 0.678916421 | 1.464 |
| ENSG00000168907 | PLA2G4F       | 0.678916421 | 1.464 |
| ENSG00000168970 | JMJD7-PLA2G4B | 0.678916421 | 1.464 |
| ENSG00000169247 | SH3TC2        | 0.678916421 | 1.464 |
| ENSG00000169550 | MUC15         | 0.678916421 | 1.464 |
| ENSG00000170439 | METTL7B       | 0.678916421 | 1.464 |
| ENSG00000170486 | KRT72         | 0.678916421 | 1.464 |
| ENSG00000171219 | CDC42BPG      | 0.678916421 | 1.464 |
| ENSG00000171345 | KRT19         | 0.678916421 | 1.464 |
| ENSG00000171451 | DSEL          | 0.678916421 | 1.464 |
| ENSG00000171804 | WDR87         | 0.678916421 | 1.464 |
| ENSG00000173610 | UGT2A1        | 0.678916421 | 1.464 |
| ENSG00000173898 | SPTBN2        | 0.678916421 | 1.464 |
| ENSG00000174898 | CATSPERD      | 0.678916421 | 1.464 |
| ENSG00000174951 | FUT1          | 0.678916421 | 1.464 |
| ENSG00000175262 | C1orf127      | 0.678916421 | 1.464 |
| ENSG00000175283 | DOLK          | 0.678916421 | 1.464 |
| ENSG00000175514 | GPR152        | 0.678916421 | 1.464 |
| ENSG00000176208 | ATAD5         | 0.678916421 | 1.464 |
| ENSG00000177058 | SLC38A9       | 0.678916421 | 1.464 |
| ENSG00000177311 | ZBTB38        | 0.678916421 | 1.464 |
| ENSG00000178038 | ALS2CL        | 0.678916421 | 1.464 |
| ENSG00000178467 | P4HTM         | 0.678916421 | 1.464 |
| ENSG00000178773 | CPNE7         | 0.678916421 | 1.464 |
| ENSG00000179044 | EXOC3L1       | 0.678916421 | 1.464 |
| ENSG00000179046 | TRIML2        | 0.678916421 | 1.464 |
| ENSG00000179364 | PACS2         | 0.678916421 | 1.464 |
| ENSG00000179709 | NLRP8         | 0.678916421 | 1.464 |
| ENSG00000180549 | FUT7          | 0.678916421 | 1.464 |
| ENSG00000181074 | OR52N4        | 0.678916421 | 1.464 |
| ENSG00000181381 | DDX60L        | 0.678916421 | 1.464 |

|                 |              |             |       |
|-----------------|--------------|-------------|-------|
| ENSG00000182446 | NPLOC4       | 0.678916421 | 1.464 |
| ENSG00000182667 | NTM          | 0.678916421 | 1.464 |
| ENSG00000184434 | LRRIC19      | 0.678916421 | 1.464 |
| ENSG00000185664 | PMEL         | 0.678916421 | 1.464 |
| ENSG00000186190 | BPIFB3       | 0.678916421 | 1.464 |
| ENSG00000186354 | C9orf47      | 0.678916421 | 1.464 |
| ENSG00000186806 | VSIG10L      | 0.678916421 | 1.464 |
| ENSG00000186971 | KRTAP13-4    | 0.678916421 | 1.464 |
| ENSG00000187720 | THSD4        | 0.678916421 | 1.464 |
| ENSG00000187950 | OVCH1        | 0.678916421 | 1.464 |
| ENSG00000188015 | S100A3       | 0.678916421 | 1.464 |
| ENSG00000188992 | LIPI         | 0.678916421 | 1.464 |
| ENSG00000189180 | ZNF33A       | 0.678916421 | 1.464 |
| ENSG00000189350 | FAM179A      | 0.678916421 | 1.464 |
| ENSG00000196305 | IARS         | 0.678916421 | 1.464 |
| ENSG00000196878 | LAMB3        | 0.678916421 | 1.464 |
| ENSG00000197024 | ZNF398       | 0.678916421 | 1.464 |
| ENSG00000197168 | NEK5         | 0.678916421 | 1.464 |
| ENSG00000197343 | ZNF655       | 0.678916421 | 1.464 |
| ENSG00000197444 | OGDHL        | 0.678916421 | 1.464 |
| ENSG00000197530 | MIB2         | 0.678916421 | 1.464 |
| ENSG00000197535 | MYO5A        | 0.678916421 | 1.464 |
| ENSG00000198010 | DLGAP2       | 0.678916421 | 1.464 |
| ENSG00000198046 | ZNF667       | 0.678916421 | 1.464 |
| ENSG00000198108 | CHSY3        | 0.678916421 | 1.464 |
| ENSG00000198399 | ITSN2        | 0.678916421 | 1.464 |
| ENSG00000198707 | CEP290       | 0.678916421 | 1.464 |
| ENSG00000204518 | AADA4L4      | 0.678916421 | 1.464 |
| ENSG00000204560 | DHX16        | 0.678916421 | 1.464 |
| ENSG00000204644 | ZFP57        | 0.678916421 | 1.464 |
| ENSG00000205754 | SLCO1B7      | 0.678916421 | 1.464 |
| ENSG00000206190 | ATP10A       | 0.678916421 | 1.464 |
| ENSG00000206199 | ANKUB1       | 0.678916421 | 1.464 |
| ENSG00000213213 | CCDC183      | 0.678916421 | 1.464 |
| ENSG00000213533 | TMEM110      | 0.678916421 | 1.464 |
| ENSG00000213918 | DNASE1       | 0.678916421 | 1.464 |
| ENSG00000218336 | TENM3        | 0.678916421 | 1.464 |
| ENSG00000219016 | CTA-299D3.8  | 0.678916421 | 1.464 |
| ENSG00000224470 | ATXN1L       | 0.678916421 | 1.464 |
| ENSG00000241484 | ARHGAP8      | 0.678916421 | 1.464 |
| ENSG00000243232 | PCDHAC2      | 0.678916421 | 1.464 |
| ENSG00000243708 | PLA2G4B      | 0.678916421 | 1.464 |
| ENSG00000248383 | PCDHAC1      | 0.678916421 | 1.464 |
| ENSG00000248405 | PRR5-ARHGAP8 | 0.678916421 | 1.464 |
| ENSG00000248905 | FMN1         | 0.678916421 | 1.464 |
| ENSG00000250423 | KIAA1210     | 0.678916421 | 1.464 |
| ENSG00000255346 | NOX5         | 0.678916421 | 1.464 |

|                 |           |             |             |
|-----------------|-----------|-------------|-------------|
| ENSG00000261934 | PCDHGA9   | 0.678916421 | 1.464       |
| ENSG00000039650 | PNKP      | 0.682524101 | 0.561833019 |
| ENSG00000042980 | ADAM28    | 0.682524101 | 0.561833019 |
| ENSG00000089101 | C20orf26  | 0.682524101 | 0.561833019 |
| ENSG00000095539 | SEMA4G    | 0.682524101 | 0.561833019 |
| ENSG00000101639 | CEP192    | 0.682524101 | 0.561833019 |
| ENSG00000102780 | DGKH      | 0.682524101 | 0.561833019 |
| ENSG00000113249 | HAVCR1    | 0.682524101 | 0.561833019 |
| ENSG00000116731 | PRDM2     | 0.682524101 | 0.561833019 |
| ENSG00000119227 | PIGZ      | 0.682524101 | 0.561833019 |
| ENSG00000120278 | PLEKHG1   | 0.682524101 | 0.561833019 |
| ENSG00000128567 | PODXL     | 0.682524101 | 0.561833019 |
| ENSG00000133943 | C14orf159 | 0.682524101 | 0.561833019 |
| ENSG00000137145 | DENND4C   | 0.682524101 | 0.561833019 |
| ENSG00000137975 | CLCA2     | 0.682524101 | 0.561833019 |
| ENSG00000138246 | DNAJC13   | 0.682524101 | 0.561833019 |
| ENSG00000143921 | ABCG8     | 0.682524101 | 0.561833019 |
| ENSG00000146112 | PPP1R18   | 0.682524101 | 0.561833019 |
| ENSG00000150990 | DHX37     | 0.682524101 | 0.561833019 |
| ENSG00000158805 | ZNF276    | 0.682524101 | 0.561833019 |
| ENSG00000160767 | FAM189B   | 0.682524101 | 0.561833019 |
| ENSG00000162129 | CLPB      | 0.682524101 | 0.561833019 |
| ENSG00000164743 | C8orf48   | 0.682524101 | 0.561833019 |
| ENSG00000165914 | TTC7B     | 0.682524101 | 0.561833019 |
| ENSG00000166402 | TUB       | 0.682524101 | 0.561833019 |
| ENSG00000171603 | CLSTN1    | 0.682524101 | 0.561833019 |
| ENSG00000173567 | GPR113    | 0.682524101 | 0.561833019 |
| ENSG00000176771 | NCKAP5    | 0.682524101 | 0.561833019 |
| ENSG00000178338 | ZNF354B   | 0.682524101 | 0.561833019 |
| ENSG00000182752 | PAPPA     | 0.682524101 | 0.561833019 |
| ENSG00000197249 | SERPINA1  | 0.682524101 | 0.561833019 |
| ENSG00000243156 | MICAL3    | 0.682524101 | 0.561833019 |
| ENSG00000254986 | DPP3      | 0.682524101 | 0.561833019 |
| ENSG00000011028 | MRC2      | 0.71750026  | 1.345169282 |
| ENSG00000022556 | NLRP2     | 0.71750026  | 1.345169282 |
| ENSG00000038532 | CLEC16A   | 0.71750026  | 1.345169282 |
| ENSG00000047365 | ARAP2     | 0.71750026  | 1.345169282 |
| ENSG00000065526 | SPEN      | 0.71750026  | 1.345169282 |
| ENSG00000069869 | NEDD4     | 0.71750026  | 1.345169282 |
| ENSG00000070882 | OSBPL3    | 0.71750026  | 1.345169282 |
| ENSG00000072195 | SPEG      | 0.71750026  | 1.345169282 |
| ENSG00000086967 | MYBPC2    | 0.71750026  | 1.345169282 |
| ENSG00000088876 | ZNF343    | 0.71750026  | 1.345169282 |
| ENSG00000089041 | P2RX7     | 0.71750026  | 1.345169282 |
| ENSG00000089639 | GMIP      | 0.71750026  | 1.345169282 |
| ENSG00000093009 | CDC45     | 0.71750026  | 1.345169282 |
| ENSG00000100578 | KIAA0586  | 0.71750026  | 1.345169282 |

|                 |          |            |             |
|-----------------|----------|------------|-------------|
| ENSG00000102763 | VWA8     | 0.71750026 | 1.345169282 |
| ENSG00000103657 | HERC1    | 0.71750026 | 1.345169282 |
| ENSG00000104728 | ARHGEF10 | 0.71750026 | 1.345169282 |
| ENSG00000105429 | MEGF8    | 0.71750026 | 1.345169282 |
| ENSG00000107290 | SETX     | 0.71750026 | 1.345169282 |
| ENSG00000108510 | MED13    | 0.71750026 | 1.345169282 |
| ENSG00000108846 | ABCC3    | 0.71750026 | 1.345169282 |
| ENSG00000109927 | TECTA    | 0.71750026 | 1.345169282 |
| ENSG00000110756 | HPS5     | 0.71750026 | 1.345169282 |
| ENSG00000111879 | FAM184A  | 0.71750026 | 1.345169282 |
| ENSG00000111961 | SASH1    | 0.71750026 | 1.345169282 |
| ENSG00000115159 | GPD2     | 0.71750026 | 1.345169282 |
| ENSG00000115282 | TTC31    | 0.71750026 | 1.345169282 |
| ENSG00000115295 | CLIP4    | 0.71750026 | 1.345169282 |
| ENSG00000117724 | CENPF    | 0.71750026 | 1.345169282 |
| ENSG00000117834 | SLC5A9   | 0.71750026 | 1.345169282 |
| ENSG00000120262 | CCDC170  | 0.71750026 | 1.345169282 |
| ENSG00000120451 | SNX19    | 0.71750026 | 1.345169282 |
| ENSG00000122786 | CALD1    | 0.71750026 | 1.345169282 |
| ENSG00000124191 | TOX2     | 0.71750026 | 1.345169282 |
| ENSG00000125508 | SRMS     | 0.71750026 | 1.345169282 |
| ENSG00000126773 | PCNXL4   | 0.71750026 | 1.345169282 |
| ENSG00000128285 | MCHR1    | 0.71750026 | 1.345169282 |
| ENSG00000130528 | HRC      | 0.71750026 | 1.345169282 |
| ENSG00000130640 | TUBGCP2  | 0.71750026 | 1.345169282 |
| ENSG00000133020 | MYH8     | 0.71750026 | 1.345169282 |
| ENSG00000133401 | PDZD2    | 0.71750026 | 1.345169282 |
| ENSG00000137752 | CASP1    | 0.71750026 | 1.345169282 |
| ENSG00000137841 | PLCB2    | 0.71750026 | 1.345169282 |
| ENSG00000137868 | STRA6    | 0.71750026 | 1.345169282 |
| ENSG00000138376 | BARD1    | 0.71750026 | 1.345169282 |
| ENSG00000139044 | B4GALNT3 | 0.71750026 | 1.345169282 |
| ENSG00000139116 | KIF21A   | 0.71750026 | 1.345169282 |
| ENSG00000140873 | ADAMTS18 | 0.71750026 | 1.345169282 |
| ENSG00000144028 | SNRNP200 | 0.71750026 | 1.345169282 |
| ENSG00000148143 | ZNF462   | 0.71750026 | 1.345169282 |
| ENSG00000154415 | PPP1R3A  | 0.71750026 | 1.345169282 |
| ENSG00000158816 | VWA5B1   | 0.71750026 | 1.345169282 |
| ENSG00000159640 | ACE      | 0.71750026 | 1.345169282 |
| ENSG00000160505 | NLRP4    | 0.71750026 | 1.345169282 |
| ENSG00000162688 | AGL      | 0.71750026 | 1.345169282 |
| ENSG00000162897 | FCAMR    | 0.71750026 | 1.345169282 |
| ENSG00000163565 | IFI16    | 0.71750026 | 1.345169282 |
| ENSG00000163867 | ZMYM6    | 0.71750026 | 1.345169282 |
| ENSG00000164741 | DLC1     | 0.71750026 | 1.345169282 |
| ENSG00000164877 | MICALL2  | 0.71750026 | 1.345169282 |
| ENSG00000166450 | PRTG     | 0.71750026 | 1.345169282 |

|                  |                |             |             |
|------------------|----------------|-------------|-------------|
| ENSG00000168026  | TTC21A         | 0.71750026  | 1.345169282 |
| ENSG00000168916  | ZNF608         | 0.71750026  | 1.345169282 |
| ENSG00000169876  | MUC17          | 0.71750026  | 1.345169282 |
| ENSG00000170471  | RALGAPB        | 0.71750026  | 1.345169282 |
| ENSG00000170776  | AKAP13         | 0.71750026  | 1.345169282 |
| ENSG00000171798  | KNDC1          | 0.71750026  | 1.345169282 |
| ENSG00000172915  | NBEA           | 0.71750026  | 1.345169282 |
| ENSG00000173064  | HECTD4         | 0.71750026  | 1.345169282 |
| ENSG00000173612  | GPRC6A         | 0.71750026  | 1.345169282 |
| ENSG00000176978  | DPP7           | 0.71750026  | 1.345169282 |
| ENSG00000183833  | MAATS1         | 0.71750026  | 1.345169282 |
| ENSG00000184500  | PROS1          | 0.71750026  | 1.345169282 |
| ENSG00000184956  | MUC6           | 0.71750026  | 1.345169282 |
| ENSG00000186867  | QRFPR          | 0.71750026  | 1.345169282 |
| ENSG00000196569  | LAMA2          | 0.71750026  | 1.345169282 |
| ENSG00000197579  | TOPORS         | 0.71750026  | 1.345169282 |
| ENSG00000197816  | CCDC180        | 0.71750026  | 1.345169282 |
| ENSG00000198300  | PEG3           | 0.71750026  | 1.345169282 |
| ENSG00000198879  | SFMBT2         | 0.71750026  | 1.345169282 |
| ENSG00000204291  | COL15A1        | 0.71750026  | 1.345169282 |
| ENSG00000214944  | ARHGEF28       | 0.71750026  | 1.345169282 |
| ENSG00000221955  | SLC12A8        | 0.71750026  | 1.345169282 |
| ENSG00000248592  | TMEM110-MUSTN1 | 0.71750026  | 1.345169282 |
| ENSG00000253729  | PRKDC          | 0.71750026  | 1.345169282 |
| ENSG00000123473  | STIL           | 0.720710484 | 0.643636364 |
| ENSG00000128849  | CGNL1          | 0.720710484 | 0.643636364 |
| ENSG00000131016  | AKAP12         | 0.720710484 | 0.643636364 |
| ENSG00000133640  | LRRIQ1         | 0.720710484 | 0.643636364 |
| ENSG00000142185  | TRPM2          | 0.720710484 | 0.643636364 |
| ENSG00000146122  | DAAM2          | 0.720710484 | 0.643636364 |
| ENSG00000153207  | AHCTF1         | 0.720710484 | 0.643636364 |
| ENSG00000175065  | DSG4           | 0.720710484 | 0.643636364 |
| ENSG00000196460  | RFX8           | 0.720710484 | 0.643636364 |
| ENSG00000007202  | KIAA0100       | 0.744330397 | 1.279402209 |
| ENSG00000008710  | PKD1           | 0.744330397 | 1.279402209 |
| ENSG000000051825 | MPHOSPH9       | 0.744330397 | 1.279402209 |
| ENSG000000077942 | FBLN1          | 0.744330397 | 1.279402209 |
| ENSG000000090905 | TNRC6A         | 0.744330397 | 1.279402209 |
| ENSG00000129250  | KIF1C          | 0.744330397 | 1.279402209 |
| ENSG00000139734  | DIAPH3         | 0.744330397 | 1.279402209 |
| ENSG00000143631  | FLG            | 0.744330397 | 1.279402209 |
| ENSG00000145075  | CCDC39         | 0.744330397 | 1.279402209 |
| ENSG00000175267  | VWA3A          | 0.744330397 | 1.279402209 |
| ENSG00000197879  | MYO1C          | 0.744330397 | 1.279402209 |
| ENSG00000198198  | SZT2           | 0.744330397 | 1.279402209 |
| ENSG00000112297  | AIM1           | 0.747269128 | 0.700311249 |
| ENSG00000178209  | PLEC           | 0.747269128 | 0.700311249 |

|                 |          |             |             |
|-----------------|----------|-------------|-------------|
| ENSG00000196159 | FAT4     | 0.747269128 | 0.700311249 |
| ENSG00000095397 | DFNB31   | 0.764312636 | 1.237762238 |
| ENSG00000103994 | ZNF106   | 0.764312636 | 1.237762238 |
| ENSG00000110723 | EXPH5    | 0.764312636 | 1.237762238 |
| ENSG00000137474 | MYO7A    | 0.764312636 | 1.237762238 |
| ENSG00000148843 | PDCD11   | 0.764312636 | 1.237762238 |
| ENSG00000177084 | POLE     | 0.764312636 | 1.237762238 |
| ENSG00000188559 | RALGAPA2 | 0.764312636 | 1.237762238 |
| ENSG00000151779 | NBAS     | 0.779897372 | 1.209120221 |
| ENSG00000170927 | PKHD1    | 0.779897372 | 1.209120221 |
| ENSG00000188157 | AGRN     | 0.779897372 | 1.209120221 |
| ENSG00000198788 | MUC2     | 0.779897372 | 1.209120221 |
| ENSG00000124721 | DNAH8    | 0.782486815 | 0.773755656 |
| ENSG00000164309 | CMYA5    | 0.782486815 | 0.773755656 |
| ENSG00000152818 | UTRN     | 0.792461532 | 1.188282828 |
| ENSG00000081479 | LRP2     | 0.811595625 | 1.160183066 |
| ENSG00000101680 | LAMA1    | 0.811595625 | 1.160183066 |
| ENSG00000127603 | MACF1    | 0.8312513   | 1.135741935 |
| ENSG00000000419 | DPM1     | 1           | 0.340699816 |
| ENSG00000000457 | SCYL3    | 1           | 0.613407821 |
| ENSG00000000460 | C1orf112 | 1           | 0.613407821 |
| ENSG00000000971 | CFH      | 1           | 1.033898305 |
| ENSG00000001460 | STPG1    | 1           | 1.033898305 |
| ENSG00000001461 | NIPAL3   | 1           | 0.340699816 |
| ENSG00000001626 | CFTR     | 1           | 0.887179487 |
| ENSG00000002726 | AOC1     | 1           | 0.340699816 |
| ENSG00000002746 | HECW1    | 1           | 1.033898305 |
| ENSG00000002933 | TMEM176A | 1           | 1.033519553 |
| ENSG00000003402 | CFLAR    | 1           | 1.033519553 |
| ENSG00000004534 | RBM6     | 1           | 0.613407821 |
| ENSG00000004660 | CAMKK1   | 1           | 1.033519553 |
| ENSG00000004846 | ABCB5    | 1           | 1.034285714 |
| ENSG00000004897 | CDC27    | 1           | 1.033519553 |
| ENSG00000004948 | CALCR    | 1           | 1.033519553 |
| ENSG00000005059 | CCDC109B | 1           | 1.033898305 |
| ENSG00000005100 | DHX33    | 1           | 0.340699816 |
| ENSG00000005102 | MEOX1    | 1           | 0.340699816 |
| ENSG00000005108 | THSD7A   | 1           | 1.033519553 |
| ENSG00000005175 | RPAP3    | 1           | 1.033519553 |
| ENSG00000005339 | CREBBP   | 1           | 1.034682081 |
| ENSG00000005381 | MPO      | 1           | 0.730427764 |
| ENSG00000005469 | CROT     | 1           | 0.340699816 |
| ENSG00000005486 | RHBDD2   | 1           | 1.033519553 |
| ENSG00000005801 | ZNF195   | 1           | 0.340699816 |
| ENSG00000005884 | ITGA3    | 1           | 0.730427764 |
| ENSG00000005981 | ASB4     | 1           | 0.340699816 |
| ENSG00000006007 | GDE1     | 1           | 1.033519553 |

|                 |          |   |             |
|-----------------|----------|---|-------------|
| ENSG00000006025 | OSBPL7   | 1 | 1.033519553 |
| ENSG00000006042 | TMEM98   | 1 | 0.340699816 |
| ENSG00000006194 | ZNF263   | 1 | 0.340699816 |
| ENSG00000006210 | CX3CL1   | 1 | 1.033519553 |
| ENSG00000006432 | MAP3K9   | 1 | 0.340699816 |
| ENSG00000006451 | RALA     | 1 | 0.340699816 |
| ENSG00000006459 | KDM7A    | 1 | 0.340699816 |
| ENSG00000006607 | FARP2    | 1 | 0.730427764 |
| ENSG00000006634 | DBF4     | 1 | 0.340699816 |
| ENSG00000006638 | TBXA2R   | 1 | 0.340699816 |
| ENSG00000006747 | SCIN     | 1 | 1.033519553 |
| ENSG00000007062 | PROM1    | 1 | 0.340699816 |
| ENSG00000007171 | NOS2     | 1 | 0.340699816 |
| ENSG00000007350 | TKTL1    | 1 | 1.033519553 |
| ENSG00000007402 | CACNA2D2 | 1 | 1.033519553 |
| ENSG00000007516 | BAIAP3   | 1 | 1.033519553 |
| ENSG00000007545 | CRAMP1L  | 1 | 1.033898305 |
| ENSG00000007933 | FMO3     | 1 | 1.033519553 |
| ENSG00000007944 | MYLIP    | 1 | 0.340699816 |
| ENSG00000008283 | CYB561   | 1 | 0.340699816 |
| ENSG00000008300 | CELSR3   | 1 | 0.887179487 |
| ENSG00000008311 | AASS     | 1 | 0.340699816 |
| ENSG00000008853 | RHOBTB2  | 1 | 0.613407821 |
| ENSG00000009709 | PAX7     | 1 | 1.033519553 |
| ENSG00000009790 | TRAF3IP3 | 1 | 0.340699816 |
| ENSG00000009954 | BAZ1B    | 1 | 1.033898305 |
| ENSG00000010165 | METTL13  | 1 | 0.340699816 |
| ENSG00000010219 | DYRK4    | 1 | 1.033519553 |
| ENSG00000010319 | SEMA3G   | 1 | 1.033519553 |
| ENSG00000010404 | IDS      | 1 | 0.340699816 |
| ENSG00000010932 | FMO1     | 1 | 1.033519553 |
| ENSG00000011007 | TCEB3    | 1 | 1.033898305 |
| ENSG00000011052 | NME2     | 1 | 0.340699816 |
| ENSG00000011143 | MKS1     | 1 | 1.034285714 |
| ENSG00000011260 | UTP18    | 1 | 0.340699816 |
| ENSG00000011275 | RNF216   | 1 | 0.340699816 |
| ENSG00000011295 | TTC19    | 1 | 1.033519553 |
| ENSG00000011422 | PLAUR    | 1 | 0.613407821 |
| ENSG00000011426 | ANLN     | 1 | 1.033519553 |
| ENSG00000011523 | CEP68    | 1 | 0.613407821 |
| ENSG00000012124 | CD22     | 1 | 1.033519553 |
| ENSG00000012660 | ELOVL5   | 1 | 0.340699816 |
| ENSG00000012983 | MAP4K5   | 1 | 0.340699816 |
| ENSG00000013297 | CLDN11   | 1 | 0.340699816 |
| ENSG00000013306 | SLC25A39 | 1 | 1.033519553 |
| ENSG00000013561 | RNF14    | 1 | 0.340699816 |
| ENSG00000013588 | GPRC5A   | 1 | 0.340699816 |

|                 |          |   |             |
|-----------------|----------|---|-------------|
| ENSG00000014123 | UFL1     | 1 | 1.033519553 |
| ENSG00000014914 | MTMR11   | 1 | 1.033898305 |
| ENSG00000016864 | GLT8D1   | 1 | 0.340699816 |
| ENSG00000017373 | SRCIN1   | 1 | 1.033519553 |
| ENSG00000017621 | MAGIX    | 1 | 1.033519553 |
| ENSG00000018408 | WWTR1    | 1 | 0.613407821 |
| ENSG00000018625 | ATP1A2   | 1 | 1.033519553 |
| ENSG00000018699 | TTC27    | 1 | 0.340699816 |
| ENSG00000019169 | MARCO    | 1 | 1.033898305 |
| ENSG00000020181 | GPR124   | 1 | 0.730427764 |
| ENSG00000021488 | SLC7A9   | 1 | 0.340699816 |
| ENSG00000021645 | NRXN3    | 1 | 0.340699816 |
| ENSG00000021852 | C8B      | 1 | 0.340699816 |
| ENSG00000022567 | SLC45A4  | 1 | 1.033898305 |
| ENSG00000022840 | RNF10    | 1 | 1.033519553 |
| ENSG00000023228 | NDUFS1   | 1 | 1.033519553 |
| ENSG00000023892 | DEF6     | 1 | 1.033519553 |
| ENSG00000023902 | PLEKHO1  | 1 | 0.730427764 |
| ENSG00000024526 | DEPDC1   | 1 | 0.340699816 |
| ENSG00000025423 | HSD17B6  | 1 | 0.340699816 |
| ENSG00000026025 | VIM      | 1 | 0.340699816 |
| ENSG00000027847 | B4GALT7  | 1 | 1.033898305 |
| ENSG00000029153 | ARNTL2   | 1 | 1.033519553 |
| ENSG00000029534 | ANK1     | 1 | 1.034682081 |
| ENSG00000029639 | TFB1M    | 1 | 0.340699816 |
| ENSG00000030582 | GRN      | 1 | 0.340699816 |
| ENSG00000031003 | FAM13B   | 1 | 1.033519553 |
| ENSG00000031081 | ARHGAP31 | 1 | 0.613407821 |
| ENSG00000031823 | RANBP3   | 1 | 1.033519553 |
| ENSG00000033050 | ABCF2    | 1 | 0.340699816 |
| ENSG00000033100 | CHPF2    | 1 | 0.613407821 |
| ENSG00000034971 | MYOC     | 1 | 0.340699816 |
| ENSG00000035115 | SH3YL1   | 1 | 0.340699816 |
| ENSG00000035141 | FAM136A  | 1 | 0.340699816 |
| ENSG00000035403 | VCL      | 1 | 0.613407821 |
| ENSG00000035720 | STAP1    | 1 | 0.340699816 |
| ENSG00000036054 | TBC1D23  | 1 | 0.613407821 |
| ENSG00000036549 | ZZZ3     | 1 | 0.340699816 |
| ENSG00000036565 | SLC18A1  | 1 | 1.033519553 |
| ENSG00000036828 | CASR     | 1 | 0.340699816 |
| ENSG00000037280 | FLT4     | 1 | 0.340699816 |
| ENSG00000038219 | BOD1L1   | 1 | 1.035928144 |
| ENSG00000039523 | FAM65A   | 1 | 0.340699816 |
| ENSG00000039987 | BEST2    | 1 | 1.033519553 |
| ENSG00000040341 | STAU2    | 1 | 0.340699816 |
| ENSG00000040531 | CTNS     | 1 | 1.033519553 |
| ENSG00000041880 | PARP3    | 1 | 1.033519553 |

|                 |          |   |             |
|-----------------|----------|---|-------------|
| ENSG00000042445 | RETSAT   | 1 | 1.034285714 |
| ENSG00000043143 | JADE2    | 1 | 0.340699816 |
| ENSG00000043462 | LCP2     | 1 | 0.340699816 |
| ENSG00000043514 | TRIT1    | 1 | 1.033519553 |
| ENSG00000044115 | CTNNA1   | 1 | 1.033519553 |
| ENSG00000044446 | PHKA2    | 1 | 0.340699816 |
| ENSG00000044574 | HSPA5    | 1 | 0.340699816 |
| ENSG00000046889 | PREX2    | 1 | 1.034285714 |
| ENSG00000047056 | WDR37    | 1 | 1.033898305 |
| ENSG00000047617 | ANO2     | 1 | 0.613407821 |
| ENSG00000047644 | WWC3     | 1 | 0.613407821 |
| ENSG00000048342 | CC2D2A   | 1 | 1.033898305 |
| ENSG00000048405 | ZNF800   | 1 | 0.340699816 |
| ENSG00000048471 | SNX29    | 1 | 0.340699816 |
| ENSG00000048544 | MRPS10   | 1 | 0.340699816 |
| ENSG00000049089 | COL9A2   | 1 | 1.033519553 |
| ENSG00000049192 | ADAMTS6  | 1 | 1.033519553 |
| ENSG00000049283 | EPN3     | 1 | 1.034285714 |
| ENSG00000049540 | ELN      | 1 | 1.034285714 |
| ENSG00000049618 | ARID1B   | 1 | 0.340699816 |
| ENSG00000050130 | JKAMP    | 1 | 0.340699816 |
| ENSG00000050344 | NFE2L3   | 1 | 1.033898305 |
| ENSG00000050628 | PTGER3   | 1 | 0.340699816 |
| ENSG00000050767 | COL23A1  | 1 | 0.340699816 |
| ENSG00000051009 | FAM160A2 | 1 | 1.034285714 |
| ENSG00000051108 | HERPUD1  | 1 | 0.340699816 |
| ENSG00000051382 | PIK3CB   | 1 | 0.340699816 |
| ENSG00000051620 | HEBP2    | 1 | 1.033898305 |
| ENSG00000052749 | RRP12    | 1 | 0.340699816 |
| ENSG00000053524 | MCF2L2   | 1 | 0.340699816 |
| ENSG00000053900 | ANAPC4   | 1 | 0.340699816 |
| ENSG00000054179 | ENTPD2   | 1 | 1.033519553 |
| ENSG00000054277 | OPN3     | 1 | 1.033519553 |
| ENSG00000054392 | HHAT     | 1 | 1.033519553 |
| ENSG00000054523 | KIF1B    | 1 | 0.613407821 |
| ENSG00000054654 | SYNE2    | 1 | 1.036363636 |
| ENSG00000054690 | PLEKHH1  | 1 | 1.034285714 |
| ENSG00000054983 | GALC     | 1 | 1.033519553 |
| ENSG00000055044 | NOP58    | 1 | 0.340699816 |
| ENSG00000055483 | USP36    | 1 | 1.033519553 |
| ENSG00000055955 | ITIH4    | 1 | 1.033898305 |
| ENSG00000055957 | ITIH1    | 1 | 0.340699816 |
| ENSG00000057019 | DCBLD2   | 1 | 0.613407821 |
| ENSG00000057149 | SERPINB3 | 1 | 0.340699816 |
| ENSG00000057294 | PKP2     | 1 | 0.340699816 |
| ENSG00000058085 | LAMC2    | 1 | 1.033898305 |
| ENSG00000058600 | POLR3E   | 1 | 0.340699816 |

|                 |          |   |             |
|-----------------|----------|---|-------------|
| ENSG00000058729 | RIOK2    | 1 | 0.613407821 |
| ENSG00000058799 | YIPF1    | 1 | 0.340699816 |
| ENSG00000059122 | FLYWCH1  | 1 | 0.340699816 |
| ENSG00000059691 | PET112   | 1 | 1.033519553 |
| ENSG00000059915 | PSD      | 1 | 0.340699816 |
| ENSG00000060237 | WNK1     | 1 | 1.034285714 |
| ENSG00000060491 | OGFR     | 1 | 0.340699816 |
| ENSG00000060642 | PIGV     | 1 | 1.033519553 |
| ENSG00000061337 | LZTS1    | 1 | 0.613407821 |
| ENSG00000061656 | SPAG4    | 1 | 1.033519553 |
| ENSG00000061676 | NCKAP1   | 1 | 1.033519553 |
| ENSG00000061794 | MRPS35   | 1 | 0.340699816 |
| ENSG00000062194 | GPBP1    | 1 | 1.033519553 |
| ENSG00000062370 | ZNF112   | 1 | 0.340699816 |
| ENSG00000062524 | LTK      | 1 | 0.730427764 |
| ENSG00000062725 | APPBP2   | 1 | 1.033519553 |
| ENSG00000063176 | SPHK2    | 1 | 1.033898305 |
| ENSG00000063177 | RPL18    | 1 | 1.033519553 |
| ENSG00000063438 | AHRR     | 1 | 1.033898305 |
| ENSG00000063978 | RNF4     | 1 | 0.340699816 |
| ENSG00000064115 | TM7SF3   | 1 | 1.033519553 |
| ENSG00000064270 | ATP2C2   | 1 | 0.730427764 |
| ENSG00000064309 | CDON     | 1 | 0.340699816 |
| ENSG00000064545 | TMEM161A | 1 | 0.340699816 |
| ENSG00000064763 | FAR2     | 1 | 0.340699816 |
| ENSG00000064933 | PMS1     | 1 | 1.033519553 |
| ENSG00000065029 | ZNF76    | 1 | 0.730427764 |
| ENSG00000065057 | NTHL1    | 1 | 1.033519553 |
| ENSG00000065150 | IPO5     | 1 | 0.340699816 |
| ENSG00000065183 | WDR3     | 1 | 0.340699816 |
| ENSG00000065308 | TRAM2    | 1 | 0.340699816 |
| ENSG00000065325 | GLP2R    | 1 | 1.033519553 |
| ENSG00000065361 | ERBB3    | 1 | 0.613407821 |
| ENSG00000065491 | TBC1D22B | 1 | 0.340699816 |
| ENSG00000065548 | ZC3H15   | 1 | 0.340699816 |
| ENSG00000065609 | SNAP91   | 1 | 0.340699816 |
| ENSG00000065989 | PDE4A    | 1 | 0.340699816 |
| ENSG00000066084 | DIP2B    | 1 | 0.340699816 |
| ENSG00000066185 | ZMYND12  | 1 | 0.340699816 |
| ENSG00000066422 | ZBTB11   | 1 | 0.613407821 |
| ENSG00000066583 | ISOC1    | 1 | 1.033519553 |
| ENSG00000066651 | TRMT11   | 1 | 1.033519553 |
| ENSG00000066739 | ATG2B    | 1 | 1.034682081 |
| ENSG00000066777 | ARFGEF1  | 1 | 1.033898305 |
| ENSG00000067057 | PFKP     | 1 | 1.033898305 |
| ENSG00000067082 | KLF6     | 1 | 0.340699816 |
| ENSG00000067141 | NEO1     | 1 | 1.033519553 |

|                 |         |   |             |
|-----------------|---------|---|-------------|
| ENSG00000067221 | STOML1  | 1 | 1.033519553 |
| ENSG00000067225 | PKM     | 1 | 0.340699816 |
| ENSG00000067334 | DNTTIP2 | 1 | 0.340699816 |
| ENSG00000067533 | RRP15   | 1 | 0.340699816 |
| ENSG00000067596 | DHX8    | 1 | 1.033898305 |
| ENSG00000067836 | ROGDI   | 1 | 1.033519553 |
| ENSG00000068028 | RASSF1  | 1 | 1.033519553 |
| ENSG00000068078 | FGFR3   | 1 | 0.730427764 |
| ENSG00000068079 | IFI35   | 1 | 1.033519553 |
| ENSG00000068097 | HEATR6  | 1 | 0.613407821 |
| ENSG00000068137 | PLEKHH3 | 1 | 1.033519553 |
| ENSG00000068305 | MEF2A   | 1 | 1.033519553 |
| ENSG00000068354 | TBC1D25 | 1 | 1.033519553 |
| ENSG00000068394 | GPKOW   | 1 | 0.340699816 |
| ENSG00000068654 | POLR1A  | 1 | 0.837099317 |
| ENSG00000068784 | SRBD1   | 1 | 1.033519553 |
| ENSG00000068878 | PSME4   | 1 | 0.340699816 |
| ENSG00000068885 | IFT80   | 1 | 0.340699816 |
| ENSG00000070018 | LRP6    | 1 | 1.033898305 |
| ENSG00000070019 | GUCY2C  | 1 | 0.730427764 |
| ENSG00000070159 | PTPN3   | 1 | 1.033519553 |
| ENSG00000070193 | FGF10   | 1 | 0.340699816 |
| ENSG00000070269 | TMEM260 | 1 | 1.033898305 |
| ENSG00000070366 | SMG6    | 1 | 1.033519553 |
| ENSG00000070371 | CLTCL1  | 1 | 1.035087719 |
| ENSG00000070476 | ZXDC    | 1 | 0.340699816 |
| ENSG00000070759 | TESK2   | 1 | 0.340699816 |
| ENSG00000070778 | PTPN21  | 1 | 1.033519553 |
| ENSG00000070886 | EPHA8   | 1 | 0.340699816 |
| ENSG00000071082 | RPL31   | 1 | 1.033519553 |
| ENSG00000071242 | RPS6KA2 | 1 | 1.033519553 |
| ENSG00000071537 | SEL1L   | 1 | 1.033898305 |
| ENSG00000071564 | TCF3    | 1 | 1.033898305 |
| ENSG00000071794 | HLTF    | 1 | 1.033898305 |
| ENSG00000071894 | CPSF1   | 1 | 0.340699816 |
| ENSG00000072041 | SLC6A15 | 1 | 1.033898305 |
| ENSG00000072133 | RPS6KA6 | 1 | 0.340699816 |
| ENSG00000072134 | EPN2    | 1 | 0.340699816 |
| ENSG00000072135 | PTPN18  | 1 | 1.033519553 |
| ENSG00000072274 | TFRC    | 1 | 0.340699816 |
| ENSG00000072310 | SREBF1  | 1 | 0.613407821 |
| ENSG00000072364 | AFF4    | 1 | 1.033519553 |
| ENSG00000072415 | MPP5    | 1 | 1.033519553 |
| ENSG00000072518 | MARK2   | 1 | 1.033519553 |
| ENSG00000072571 | HMMR    | 1 | 0.340699816 |
| ENSG00000072786 | STK10   | 1 | 0.340699816 |
| ENSG00000072840 | EVC     | 1 | 1.033519553 |

|                 |           |   |             |
|-----------------|-----------|---|-------------|
| ENSG00000072864 | NDE1      | 1 | 0.340699816 |
| ENSG00000072952 | MRVI1     | 1 | 0.613407821 |
| ENSG00000073008 | PVR       | 1 | 0.340699816 |
| ENSG00000073146 | MOV10L1   | 1 | 1.033898305 |
| ENSG00000073169 | SELO      | 1 | 1.033519553 |
| ENSG00000073712 | FERMT2    | 1 | 0.613407821 |
| ENSG00000073734 | ABCB11    | 1 | 0.613407821 |
| ENSG00000073803 | MAP3K13   | 1 | 1.033519553 |
| ENSG00000073861 | TBX21     | 1 | 0.340699816 |
| ENSG00000074211 | PPP2R2C   | 1 | 0.340699816 |
| ENSG00000074219 | TEAD2     | 1 | 1.033519553 |
| ENSG00000074370 | ATP2A3    | 1 | 1.033519553 |
| ENSG00000074603 | DPP8      | 1 | 1.033519553 |
| ENSG00000074621 | SLC24A1   | 1 | 0.340699816 |
| ENSG00000074657 | ZNF532    | 1 | 1.033898305 |
| ENSG00000074695 | LMAN1     | 1 | 0.340699816 |
| ENSG00000074855 | ANO8      | 1 | 0.340699816 |
| ENSG00000074964 | ARHGEF10L | 1 | 1.033898305 |
| ENSG00000074966 | TXK       | 1 | 0.340699816 |
| ENSG00000075035 | WSCD2     | 1 | 0.340699816 |
| ENSG00000075089 | ACTR6     | 1 | 0.340699816 |
| ENSG00000075151 | EIF4G3    | 1 | 1.033519553 |
| ENSG00000075239 | ACAT1     | 1 | 0.340699816 |
| ENSG00000075275 | CELSR1    | 1 | 0.795555556 |
| ENSG00000075407 | ZNF37A    | 1 | 1.033519553 |
| ENSG00000075413 | MARK3     | 1 | 1.033519553 |
| ENSG00000075461 | CACNG4    | 1 | 0.340699816 |
| ENSG00000075643 | MOCOS     | 1 | 0.340699816 |
| ENSG00000075673 | ATP12A    | 1 | 1.033898305 |
| ENSG00000075702 | WDR62     | 1 | 0.613407821 |
| ENSG00000075826 | SEC31B    | 1 | 0.795555556 |
| ENSG00000076242 | MLH1      | 1 | 1.033898305 |
| ENSG00000076351 | SLC46A1   | 1 | 1.033519553 |
| ENSG00000076382 | SPAG5     | 1 | 0.837099317 |
| ENSG00000076555 | ACACB     | 1 | 1.033898305 |
| ENSG00000076650 | GPATCH1   | 1 | 1.033519553 |
| ENSG00000076662 | ICAM3     | 1 | 1.033519553 |
| ENSG00000076706 | MCAM      | 1 | 0.340699816 |
| ENSG00000076826 | CAMSAP3   | 1 | 0.340699816 |
| ENSG00000076928 | ARHGEF1   | 1 | 1.033519553 |
| ENSG00000077063 | CTTNBP2   | 1 | 0.340699816 |
| ENSG00000077235 | GTF3C1    | 1 | 1.033519553 |
| ENSG00000077454 | LRCH4     | 1 | 0.340699816 |
| ENSG00000077498 | TYR       | 1 | 1.033519553 |
| ENSG00000077549 | CAPZB     | 1 | 0.340699816 |
| ENSG00000077585 | GPR137B   | 1 | 1.033519553 |
| ENSG00000078018 | MAP2      | 1 | 1.034285714 |

|                 |           |   |             |
|-----------------|-----------|---|-------------|
| ENSG00000078053 | AMPH      | 1 | 0.613407821 |
| ENSG00000078177 | N4BP2     | 1 | 0.340699816 |
| ENSG00000078269 | SYNJ2     | 1 | 0.837099317 |
| ENSG00000078304 | PPP2R5C   | 1 | 0.340699816 |
| ENSG00000078328 | RBFOX1    | 1 | 0.340699816 |
| ENSG00000078403 | MLLT10    | 1 | 1.033519553 |
| ENSG00000078487 | ZCWPW1    | 1 | 0.340699816 |
| ENSG00000078549 | ADCYAP1R1 | 1 | 0.340699816 |
| ENSG00000078668 | VDAC3     | 1 | 0.340699816 |
| ENSG00000078902 | TOLLIP    | 1 | 0.340699816 |
| ENSG00000079112 | CDH17     | 1 | 1.033519553 |
| ENSG00000079150 | FKBP7     | 1 | 0.340699816 |
| ENSG00000079246 | XRCC5     | 1 | 0.340699816 |
| ENSG00000079257 | LXN       | 1 | 1.033519553 |
| ENSG00000079263 | SP140     | 1 | 0.613407821 |
| ENSG00000079337 | RAPGEF3   | 1 | 0.340699816 |
| ENSG00000079385 | CEACAM1   | 1 | 1.033519553 |
| ENSG00000079387 | SENP1     | 1 | 1.033519553 |
| ENSG00000079616 | KIF22     | 1 | 0.340699816 |
| ENSG00000079691 | LRRC16A   | 1 | 0.340699816 |
| ENSG00000079805 | DNM2      | 1 | 1.033519553 |
| ENSG00000079819 | EPB41L2   | 1 | 1.033898305 |
| ENSG00000079841 | RIMS1     | 1 | 1.033519553 |
| ENSG00000079931 | MOXD1     | 1 | 0.613407821 |
| ENSG00000079950 | STX7      | 1 | 0.340699816 |
| ENSG00000080031 | PTPRH     | 1 | 1.034285714 |
| ENSG00000080224 | EPHA6     | 1 | 0.340699816 |
| ENSG00000080644 | CHRNA3    | 1 | 0.340699816 |
| ENSG00000080845 | DLGAP4    | 1 | 1.033519553 |
| ENSG00000080854 | IGSF9B    | 1 | 0.340699816 |
| ENSG00000080986 | NDC80     | 1 | 0.340699816 |
| ENSG00000081041 | CXCL2     | 1 | 1.033519553 |
| ENSG00000081181 | ARG2      | 1 | 0.340699816 |
| ENSG00000081237 | PTPRC     | 1 | 1.034285714 |
| ENSG00000081320 | STK17B    | 1 | 0.340699816 |
| ENSG00000081760 | AACS      | 1 | 0.340699816 |
| ENSG00000081791 | KIAA0141  | 1 | 1.033519553 |
| ENSG00000081803 | CADPS2    | 1 | 0.613407821 |
| ENSG00000081818 | PCDHB4    | 1 | 0.340699816 |
| ENSG00000081913 | PHLPP1    | 1 | 1.033519553 |
| ENSG00000081985 | IL12RB2   | 1 | 0.340699816 |
| ENSG00000082074 | FYB       | 1 | 1.033519553 |
| ENSG00000082213 | C5orf22   | 1 | 0.340699816 |
| ENSG00000082269 | FAM135A   | 1 | 1.033898305 |
| ENSG00000082293 | COL19A1   | 1 | 0.730427764 |
| ENSG00000082397 | EPB41L3   | 1 | 0.613407821 |
| ENSG00000082438 | COBLL1    | 1 | 0.730427764 |

|                 |          |   |             |
|-----------------|----------|---|-------------|
| ENSG00000082512 | TRAF5    | 1 | 1.033519553 |
| ENSG00000082781 | ITGB5    | 1 | 1.033898305 |
| ENSG00000082805 | ERC1     | 1 | 0.340699816 |
| ENSG00000082929 | C4orf6   | 1 | 1.033519553 |
| ENSG00000083099 | LYRM2    | 1 | 0.340699816 |
| ENSG00000083223 | ZCCHC6   | 1 | 0.340699816 |
| ENSG00000083290 | ULK2     | 1 | 0.613407821 |
| ENSG00000083457 | ITGAE    | 1 | 0.613407821 |
| ENSG00000083720 | OXCT1    | 1 | 0.613407821 |
| ENSG00000083817 | ZNF416   | 1 | 1.033519553 |
| ENSG00000083828 | ZNF586   | 1 | 0.613407821 |
| ENSG00000084073 | ZMPSTE24 | 1 | 0.340699816 |
| ENSG00000084092 | NOA1     | 1 | 1.033898305 |
| ENSG00000084093 | REST     | 1 | 1.034285714 |
| ENSG00000084110 | HAL      | 1 | 0.340699816 |
| ENSG00000084207 | GSTP1    | 1 | 0.340699816 |
| ENSG00000084453 | SLCO1A2  | 1 | 0.613407821 |
| ENSG00000084463 | WBP11    | 1 | 0.730427764 |
| ENSG00000084652 | TXLNA    | 1 | 0.340699816 |
| ENSG00000084676 | NCOA1    | 1 | 1.033519553 |
| ENSG00000084693 | AGBL5    | 1 | 1.033898305 |
| ENSG00000084710 | EFR3B    | 1 | 0.340699816 |
| ENSG00000084734 | GCKR     | 1 | 0.340699816 |
| ENSG00000084774 | CAD      | 1 | 0.340699816 |
| ENSG00000085117 | CD82     | 1 | 1.033898305 |
| ENSG00000085224 | ATRX     | 1 | 1.033898305 |
| ENSG00000085511 | MAP3K4   | 1 | 0.613407821 |
| ENSG00000085872 | CHERP    | 1 | 0.613407821 |
| ENSG00000085978 | ATG16L1  | 1 | 0.340699816 |
| ENSG00000085998 | POMGNT1  | 1 | 1.033519553 |
| ENSG00000086015 | MAST2    | 1 | 0.795555556 |
| ENSG00000086061 | DNAJA1   | 1 | 0.340699816 |
| ENSG00000086102 | NFX1     | 1 | 1.033519553 |
| ENSG00000086159 | AQP6     | 1 | 1.033519553 |
| ENSG00000086200 | IPO11    | 1 | 0.340699816 |
| ENSG00000086205 | FOLH1    | 1 | 0.730427764 |
| ENSG00000086232 | EIF2AK1  | 1 | 0.613407821 |
| ENSG00000086504 | MRPL28   | 1 | 1.033519553 |
| ENSG00000086827 | ZW10     | 1 | 1.033519553 |
| ENSG00000087076 | HSD17B14 | 1 | 1.033519553 |
| ENSG00000087191 | PSMC5    | 1 | 0.340699816 |
| ENSG00000087237 | CETP     | 1 | 0.340699816 |
| ENSG00000087245 | MMP2     | 1 | 0.340699816 |
| ENSG00000087263 | OGFOD1   | 1 | 1.033519553 |
| ENSG00000087269 | NOP14    | 1 | 1.033519553 |
| ENSG00000087274 | ADD1     | 1 | 1.033519553 |
| ENSG00000087299 | L2HGDH   | 1 | 1.033519553 |

|                 |          |   |             |
|-----------------|----------|---|-------------|
| ENSG00000087301 | TXNDC16  | 1 | 0.730427764 |
| ENSG00000087338 | GMCL1    | 1 | 0.340699816 |
| ENSG00000087365 | SF3B2    | 1 | 0.340699816 |
| ENSG00000087460 | GNAS     | 1 | 0.340699816 |
| ENSG00000087884 | AAMDC    | 1 | 0.340699816 |
| ENSG00000087916 | SLC6A14  | 1 | 0.340699816 |
| ENSG00000088053 | GP6      | 1 | 0.340699816 |
| ENSG00000088179 | PTPN4    | 1 | 0.340699816 |
| ENSG00000088280 | ASAP3    | 1 | 1.035087719 |
| ENSG00000088298 | EDEM2    | 1 | 0.613407821 |
| ENSG00000088325 | TPX2     | 1 | 1.033519553 |
| ENSG00000088682 | COQ9     | 1 | 1.033519553 |
| ENSG00000088808 | PPP1R13B | 1 | 1.033519553 |
| ENSG00000088882 | CPXM1    | 1 | 1.033519553 |
| ENSG00000089048 | ESF1     | 1 | 1.033519553 |
| ENSG00000089060 | SLC8B1   | 1 | 1.033519553 |
| ENSG00000089063 | TMEM230  | 1 | 1.033519553 |
| ENSG00000089091 | DZANK1   | 1 | 0.613407821 |
| ENSG00000089094 | KDM2B    | 1 | 1.033898305 |
| ENSG00000089127 | OAS1     | 1 | 0.340699816 |
| ENSG00000089159 | PXN      | 1 | 0.613407821 |
| ENSG00000089177 | KIF16B   | 1 | 0.613407821 |
| ENSG00000089195 | TRMT6    | 1 | 1.033519553 |
| ENSG00000089225 | TBX5     | 1 | 0.340699816 |
| ENSG00000089250 | NOS1     | 1 | 1.034682081 |
| ENSG00000089351 | GRAMD1A  | 1 | 1.033519553 |
| ENSG00000089356 | FXD3     | 1 | 0.340699816 |
| ENSG00000089558 | KCNH4    | 1 | 0.613407821 |
| ENSG00000089693 | MLF2     | 1 | 0.340699816 |
| ENSG00000089723 | OTUB2    | 1 | 0.340699816 |
| ENSG00000089775 | ZBTB25   | 1 | 0.340699816 |
| ENSG00000089847 | ANKRD24  | 1 | 1.033519553 |
| ENSG00000090006 | LTBP4    | 1 | 0.613407821 |
| ENSG00000090013 | BLVRB    | 1 | 1.033519553 |
| ENSG00000090020 | SLC9A1   | 1 | 1.033519553 |
| ENSG00000090376 | IRAK3    | 1 | 0.340699816 |
| ENSG00000090512 | FETUB    | 1 | 0.340699816 |
| ENSG00000090530 | LEPREL1  | 1 | 1.033519553 |
| ENSG00000090539 | CHRD     | 1 | 0.340699816 |
| ENSG00000090612 | ZNF268   | 1 | 0.613407821 |
| ENSG00000090615 | GOLGA3   | 1 | 1.034682081 |
| ENSG00000090686 | USP48    | 1 | 0.340699816 |
| ENSG00000090861 | AARS     | 1 | 0.613407821 |
| ENSG00000090889 | KIF4A    | 1 | 1.033519553 |
| ENSG00000090920 | FCGBP    | 1 | 0.795555556 |
| ENSG00000090924 | PLEKHG2  | 1 | 1.033519553 |
| ENSG00000090932 | DLL3     | 1 | 0.340699816 |

|                 |          |   |             |
|-----------------|----------|---|-------------|
| ENSG00000091009 | RBM27    | 1 | 1.033519553 |
| ENSG00000091010 | POU4F3   | 1 | 0.340699816 |
| ENSG00000091073 | DTX2     | 1 | 0.340699816 |
| ENSG00000091106 | NLRC4    | 1 | 0.613407821 |
| ENSG00000091128 | LAMB4    | 1 | 1.034285714 |
| ENSG00000091129 | NRCAM    | 1 | 1.033519553 |
| ENSG00000091136 | LAMB1    | 1 | 1.033898305 |
| ENSG00000091138 | SLC26A3  | 1 | 0.340699816 |
| ENSG00000091879 | ANGPT2   | 1 | 0.340699816 |
| ENSG00000092009 | CMA1     | 1 | 1.033898305 |
| ENSG00000092010 | PSME1    | 1 | 0.613407821 |
| ENSG00000092020 | PPP2R3C  | 1 | 0.340699816 |
| ENSG00000092094 | OSGEP    | 1 | 0.340699816 |
| ENSG00000092140 | G2E3     | 1 | 0.340699816 |
| ENSG00000092148 | HECTD1   | 1 | 1.033519553 |
| ENSG00000092201 | SUPT16H  | 1 | 1.033519553 |
| ENSG00000092295 | TGM1     | 1 | 0.340699816 |
| ENSG00000092421 | SEMA6A   | 1 | 1.034285714 |
| ENSG00000092445 | TYRO3    | 1 | 0.340699816 |
| ENSG00000092853 | CLSPN    | 1 | 1.033519553 |
| ENSG00000092964 | DPYSL2   | 1 | 0.340699816 |
| ENSG00000092969 | TGFB2    | 1 | 1.033898305 |
| ENSG00000093010 | COMT     | 1 | 0.340699816 |
| ENSG00000093072 | CECR1    | 1 | 1.033519553 |
| ENSG00000093217 | XYLB     | 1 | 1.033519553 |
| ENSG00000094661 | OR11I1   | 1 | 1.033519553 |
| ENSG00000094755 | GABRP    | 1 | 0.613407821 |
| ENSG00000094880 | CDC23    | 1 | 0.340699816 |
| ENSG00000094914 | AAAS     | 1 | 0.340699816 |
| ENSG00000094975 | SUCO     | 1 | 1.033519553 |
| ENSG00000095002 | MSH2     | 1 | 1.034285714 |
| ENSG00000095261 | PSMD5    | 1 | 0.340699816 |
| ENSG00000095321 | CRAT     | 1 | 1.033519553 |
| ENSG00000095464 | PDE6C    | 1 | 0.730427764 |
| ENSG00000095564 | BTAF1    | 1 | 0.340699816 |
| ENSG00000095574 | IKZF5    | 1 | 0.340699816 |
| ENSG00000095585 | BLNK     | 1 | 0.613407821 |
| ENSG00000095596 | CYP26A1  | 1 | 0.340699816 |
| ENSG00000095627 | TDRD1    | 1 | 1.033519553 |
| ENSG00000095713 | CRTAC1   | 1 | 1.033898305 |
| ENSG00000095777 | MYO3A    | 1 | 0.613407821 |
| ENSG00000095787 | WAC      | 1 | 0.340699816 |
| ENSG00000095906 | NUBP2    | 1 | 0.613407821 |
| ENSG00000095932 | C19orf77 | 1 | 0.340699816 |
| ENSG00000095970 | TREM2    | 1 | 0.340699816 |
| ENSG00000096063 | SRPK1    | 1 | 1.033519553 |
| ENSG00000096070 | BRPF3    | 1 | 1.033519553 |

|                 |          |   |             |
|-----------------|----------|---|-------------|
| ENSG00000096080 | MRPS18A  | 1 | 0.340699816 |
| ENSG00000096433 | ITPR3    | 1 | 1.033519553 |
| ENSG00000096654 | ZNF184   | 1 | 1.033519553 |
| ENSG00000096696 | DSP      | 1 | 1.033898305 |
| ENSG00000096996 | IL12RB1  | 1 | 1.033519553 |
| ENSG00000097021 | ACOT7    | 1 | 0.340699816 |
| ENSG00000099338 | CATSPERG | 1 | 0.340699816 |
| ENSG00000099341 | PSMD8    | 1 | 0.340699816 |
| ENSG00000099377 | HSD3B7   | 1 | 1.033898305 |
| ENSG00000099834 | CDHR5    | 1 | 0.340699816 |
| ENSG00000099840 | IZUMO4   | 1 | 1.033519553 |
| ENSG00000099889 | ARVCF    | 1 | 1.034682081 |
| ENSG00000099899 | TRMT2A   | 1 | 0.340699816 |
| ENSG00000099957 | P2RX6    | 1 | 1.033519553 |
| ENSG00000099995 | SF3A1    | 1 | 0.340699816 |
| ENSG00000100014 | SPECC1L  | 1 | 1.033898305 |
| ENSG00000100034 | PPM1F    | 1 | 0.613407821 |
| ENSG00000100036 | SLC35E4  | 1 | 0.340699816 |
| ENSG00000100053 | CRYBB3   | 1 | 0.340699816 |
| ENSG00000100055 | CYTH4    | 1 | 0.340699816 |
| ENSG00000100078 | PLA2G3   | 1 | 0.730427764 |
| ENSG00000100084 | HIRA     | 1 | 0.340699816 |
| ENSG00000100099 | HPS4     | 1 | 1.033898305 |
| ENSG00000100101 | NOL12    | 1 | 0.340699816 |
| ENSG00000100104 | SRRD     | 1 | 0.340699816 |
| ENSG00000100124 | ANKRD54  | 1 | 0.340699816 |
| ENSG00000100139 | MICALL1  | 1 | 0.340699816 |
| ENSG00000100162 | CENPM    | 1 | 0.340699816 |
| ENSG00000100207 | TCF20    | 1 | 0.613407821 |
| ENSG00000100227 | POLDIP3  | 1 | 1.033519553 |
| ENSG00000100243 | CYB5R3   | 1 | 1.033519553 |
| ENSG00000100246 | DNAL4    | 1 | 0.340699816 |
| ENSG00000100249 | C22orf31 | 1 | 1.033519553 |
| ENSG00000100258 | LMF2     | 1 | 1.033519553 |
| ENSG00000100266 | PACSN2   | 1 | 1.033519553 |
| ENSG00000100280 | AP1B1    | 1 | 0.340699816 |
| ENSG00000100284 | TOM1     | 1 | 0.340699816 |
| ENSG00000100285 | NEFH     | 1 | 0.340699816 |
| ENSG00000100288 | CHKB     | 1 | 0.340699816 |
| ENSG00000100292 | HMOX1    | 1 | 1.033519553 |
| ENSG00000100294 | MCAT     | 1 | 1.033519553 |
| ENSG00000100297 | MCM5     | 1 | 0.340699816 |
| ENSG00000100298 | APOBEC3H | 1 | 0.340699816 |
| ENSG00000100311 | PDGFB    | 1 | 1.033519553 |
| ENSG00000100336 | APOL4    | 1 | 0.613407821 |
| ENSG00000100342 | APOL1    | 1 | 1.033519553 |
| ENSG00000100344 | PNPLA3   | 1 | 0.340699816 |

|                 |            |   |             |
|-----------------|------------|---|-------------|
| ENSG00000100347 | SAMM50     | 1 | 0.340699816 |
| ENSG00000100354 | TNRC6B     | 1 | 1.033898305 |
| ENSG00000100360 | IFT27      | 1 | 0.340699816 |
| ENSG00000100401 | RANGAP1    | 1 | 0.340699816 |
| ENSG00000100413 | POLR3H     | 1 | 0.340699816 |
| ENSG00000100416 | TRMU       | 1 | 1.033519553 |
| ENSG00000100418 | DES1       | 1 | 0.340699816 |
| ENSG00000100433 | KCNK10     | 1 | 0.340699816 |
| ENSG00000100478 | AP4S1      | 1 | 1.033519553 |
| ENSG00000100485 | SOS2       | 1 | 0.340699816 |
| ENSG00000100503 | NIN        | 1 | 0.730427764 |
| ENSG00000100523 | DDHD1      | 1 | 0.340699816 |
| ENSG00000100554 | ATP6V1D    | 1 | 1.033519553 |
| ENSG00000100558 | PLEK2      | 1 | 0.340699816 |
| ENSG00000100565 | C14orf166B | 1 | 0.340699816 |
| ENSG00000100591 | AHSA1      | 1 | 0.340699816 |
| ENSG00000100593 | ISM2       | 1 | 0.730427764 |
| ENSG00000100601 | ALKBH1     | 1 | 0.340699816 |
| ENSG00000100612 | DHRS7      | 1 | 0.340699816 |
| ENSG00000100626 | GALNT16    | 1 | 1.034285714 |
| ENSG00000100650 | SRSF5      | 1 | 0.340699816 |
| ENSG00000100714 | MTHFD1     | 1 | 1.033519553 |
| ENSG00000100722 | ZC3H14     | 1 | 0.340699816 |
| ENSG00000100784 | RPS6KA5    | 1 | 1.033519553 |
| ENSG00000100813 | ACIN1      | 1 | 0.613407821 |
| ENSG00000100865 | CINP       | 1 | 0.340699816 |
| ENSG00000100902 | PSMA6      | 1 | 1.033519553 |
| ENSG00000100911 | PSME2      | 1 | 1.033898305 |
| ENSG00000100926 | TM9SF1     | 1 | 0.613407821 |
| ENSG00000100941 | PNN        | 1 | 0.340699816 |
| ENSG00000100949 | RABGGTA    | 1 | 0.730427764 |
| ENSG00000100968 | NFATC4     | 1 | 0.340699816 |
| ENSG00000100979 | PLTP       | 1 | 1.033519553 |
| ENSG00000100985 | MMP9       | 1 | 0.613407821 |
| ENSG00000100991 | TRPC4AP    | 1 | 1.033898305 |
| ENSG00000100994 | PYGB       | 1 | 0.613407821 |
| ENSG00000101003 | GINS1      | 1 | 0.340699816 |
| ENSG00000101115 | SALL4      | 1 | 0.340699816 |
| ENSG00000101126 | ADNP       | 1 | 0.340699816 |
| ENSG00000101134 | DOK5       | 1 | 0.340699816 |
| ENSG00000101146 | RAE1       | 1 | 0.340699816 |
| ENSG00000101187 | SLCO4A1    | 1 | 0.340699816 |
| ENSG00000101188 | NTSR1      | 1 | 1.033898305 |
| ENSG00000101190 | TCFL5      | 1 | 0.340699816 |
| ENSG00000101191 | DIDO1      | 1 | 1.033898305 |
| ENSG00000101203 | COL20A1    | 1 | 0.613407821 |
| ENSG00000101276 | SLC52A3    | 1 | 0.340699816 |

|                 |           |   |             |
|-----------------|-----------|---|-------------|
| ENSG00000101298 | SNPH      | 1 | 1.033519553 |
| ENSG00000101306 | MYLK2     | 1 | 0.340699816 |
| ENSG00000101307 | SIRPB1    | 1 | 0.340699816 |
| ENSG00000101343 | CRNKL1    | 1 | 1.033519553 |
| ENSG00000101346 | POFUT1    | 1 | 0.340699816 |
| ENSG00000101353 | MROH8     | 1 | 0.613407821 |
| ENSG00000101457 | DNTTIP1   | 1 | 0.340699816 |
| ENSG00000101473 | ACOT8     | 1 | 0.730427764 |
| ENSG00000101474 | APMAP     | 1 | 1.033519553 |
| ENSG00000101574 | METTL4    | 1 | 0.340699816 |
| ENSG00000101605 | MYOM1     | 1 | 1.033519553 |
| ENSG00000101850 | GPR143    | 1 | 0.340699816 |
| ENSG00000101856 | PGRMC1    | 1 | 0.340699816 |
| ENSG00000101935 | AMMECR1   | 1 | 0.340699816 |
| ENSG00000101977 | MCF2      | 1 | 0.613407821 |
| ENSG00000102021 | LUZP4     | 1 | 0.340699816 |
| ENSG00000102081 | FMR1      | 1 | 0.340699816 |
| ENSG00000102158 | MAGT1     | 1 | 1.033519553 |
| ENSG00000102189 | EEA1      | 1 | 0.730427764 |
| ENSG00000102226 | USP11     | 1 | 1.033519553 |
| ENSG00000102312 | PORCN     | 1 | 0.340699816 |
| ENSG00000102445 | KIAA0226L | 1 | 1.033519553 |
| ENSG00000102452 | NALCN     | 1 | 0.730427764 |
| ENSG00000102468 | HTR2A     | 1 | 1.033519553 |
| ENSG00000102699 | PARP4     | 1 | 1.033898305 |
| ENSG00000102755 | FLT1      | 1 | 0.730427764 |
| ENSG00000102781 | KATNAL1   | 1 | 0.340699816 |
| ENSG00000102837 | OLFM4     | 1 | 0.340699816 |
| ENSG00000102854 | MSLN      | 1 | 1.035502959 |
| ENSG00000102858 | MGRN1     | 1 | 1.033519553 |
| ENSG00000102870 | ZNF629    | 1 | 0.340699816 |
| ENSG00000102879 | CORO1A    | 1 | 0.340699816 |
| ENSG00000102882 | MAPK3     | 1 | 0.340699816 |
| ENSG00000102886 | GDPD3     | 1 | 0.340699816 |
| ENSG00000102890 | ELMO3     | 1 | 1.033519553 |
| ENSG00000102904 | TSNAXIP1  | 1 | 0.340699816 |
| ENSG00000102921 | N4BP1     | 1 | 0.340699816 |
| ENSG00000102967 | DHODH     | 1 | 1.033519553 |
| ENSG00000103005 | USB1      | 1 | 0.340699816 |
| ENSG00000103034 | NDRG4     | 1 | 0.340699816 |
| ENSG00000103044 | HAS3      | 1 | 1.033519553 |
| ENSG00000103126 | AXIN1     | 1 | 1.034682081 |
| ENSG00000103152 | MPG       | 1 | 0.340699816 |
| ENSG00000103154 | NECAB2    | 1 | 0.613407821 |
| ENSG00000103174 | NAGPA     | 1 | 0.340699816 |
| ENSG00000103175 | WFDC1     | 1 | 1.033898305 |
| ENSG00000103184 | SEC14L5   | 1 | 0.340699816 |

|                 |             |   |             |
|-----------------|-------------|---|-------------|
| ENSG00000103187 | COTL1       | 1 | 1.033519553 |
| ENSG00000103194 | USP10       | 1 | 1.033519553 |
| ENSG00000103202 | NME4        | 1 | 0.340699816 |
| ENSG00000103253 | HAGHL       | 1 | 0.340699816 |
| ENSG00000103313 | MEFV        | 1 | 1.033898305 |
| ENSG00000103319 | EEF2K       | 1 | 1.033898305 |
| ENSG00000103375 | AQP8        | 1 | 1.033519553 |
| ENSG00000103426 | CORO7-PAM16 | 1 | 1.033898305 |
| ENSG00000103494 | RPGRIP1L    | 1 | 0.340699816 |
| ENSG00000103502 | CDIPT       | 1 | 0.340699816 |
| ENSG00000103528 | SYT17       | 1 | 1.033519553 |
| ENSG00000103544 | C16orf62    | 1 | 0.837099317 |
| ENSG00000103550 | KNOP1       | 1 | 1.033519553 |
| ENSG00000103740 | ACSBG1      | 1 | 1.033519553 |
| ENSG00000103888 | KIAA1199    | 1 | 1.033898305 |
| ENSG00000103932 | RPAP1       | 1 | 0.795555556 |
| ENSG00000104043 | ATP8B4      | 1 | 1.033898305 |
| ENSG00000104055 | TGM5        | 1 | 1.033519553 |
| ENSG00000104064 | GABPB1      | 1 | 0.340699816 |
| ENSG00000104067 | TJP1        | 1 | 1.034682081 |
| ENSG00000104112 | SCG3        | 1 | 0.340699816 |
| ENSG00000104213 | PDGFRL      | 1 | 0.613407821 |
| ENSG00000104219 | ZDHHC2      | 1 | 1.033519553 |
| ENSG00000104221 | BRF2        | 1 | 1.033519553 |
| ENSG00000104228 | TRIM35      | 1 | 0.340699816 |
| ENSG00000104320 | NBN         | 1 | 0.730427764 |
| ENSG00000104368 | PLAT        | 1 | 1.033519553 |
| ENSG00000104381 | GDAP1       | 1 | 0.340699816 |
| ENSG00000104415 | WISP1       | 1 | 1.033519553 |
| ENSG00000104419 | NDRG1       | 1 | 0.340699816 |
| ENSG00000104427 | ZC2HC1A     | 1 | 0.340699816 |
| ENSG00000104442 | ARMC1       | 1 | 1.033519553 |
| ENSG00000104490 | NCALD       | 1 | 0.340699816 |
| ENSG00000104497 | SNX16       | 1 | 1.033519553 |
| ENSG00000104499 | GML         | 1 | 0.340699816 |
| ENSG00000104517 | UBR5        | 1 | 1.033519553 |
| ENSG00000104611 | SH2D4A      | 1 | 0.340699816 |
| ENSG00000104613 | INTS10      | 1 | 1.033519553 |
| ENSG00000104643 | MTMR9       | 1 | 1.033519553 |
| ENSG00000104679 | R3HCC1      | 1 | 0.340699816 |
| ENSG00000104714 | ERICH1      | 1 | 0.340699816 |
| ENSG00000104722 | NEFM        | 1 | 1.033519553 |
| ENSG00000104723 | TUSC3       | 1 | 1.033519553 |
| ENSG00000104814 | MAP4K1      | 1 | 1.033519553 |
| ENSG00000104823 | ECH1        | 1 | 0.340699816 |
| ENSG00000104859 | CLASRP      | 1 | 1.033519553 |
| ENSG00000104883 | PEX11G      | 1 | 0.340699816 |

|                 |               |   |             |
|-----------------|---------------|---|-------------|
| ENSG00000104884 | ERCC2         | 1 | 0.340699816 |
| ENSG00000104885 | DOT1L         | 1 | 0.340699816 |
| ENSG00000104901 | DKKL1         | 1 | 0.340699816 |
| ENSG00000104938 | CLEC4M        | 1 | 1.033519553 |
| ENSG00000104941 | RSPH6A        | 1 | 1.033519553 |
| ENSG00000104951 | IL411         | 1 | 0.613407821 |
| ENSG00000104969 | SGTA          | 1 | 0.340699816 |
| ENSG00000104974 | LILRA1        | 1 | 1.033519553 |
| ENSG00000105063 | PPP6R1        | 1 | 1.033898305 |
| ENSG00000105085 | MED26         | 1 | 1.033519553 |
| ENSG00000105136 | ZNF419        | 1 | 1.033898305 |
| ENSG00000105176 | URI1          | 1 | 0.340699816 |
| ENSG00000105202 | FBL           | 1 | 0.613407821 |
| ENSG00000105245 | NUMBL         | 1 | 1.033519553 |
| ENSG00000105248 | CCDC94        | 1 | 0.340699816 |
| ENSG00000105278 | ZFR2          | 1 | 1.033898305 |
| ENSG00000105289 | TJP3          | 1 | 1.033898305 |
| ENSG00000105321 | CCDC9         | 1 | 0.340699816 |
| ENSG00000105325 | FZR1          | 1 | 0.340699816 |
| ENSG00000105341 | ATP5SL        | 1 | 0.730427764 |
| ENSG00000105352 | CEACAM4       | 1 | 1.033519553 |
| ENSG00000105355 | PLIN3         | 1 | 1.033519553 |
| ENSG00000105364 | MRPL4         | 1 | 1.033898305 |
| ENSG00000105372 | RPS19         | 1 | 0.340699816 |
| ENSG00000105373 | GLTSCR2       | 1 | 1.033519553 |
| ENSG00000105374 | NKG7          | 1 | 0.340699816 |
| ENSG00000105383 | CD33          | 1 | 1.033519553 |
| ENSG00000105388 | CEACAM5       | 1 | 0.613407821 |
| ENSG00000105393 | BABAM1        | 1 | 0.340699816 |
| ENSG00000105397 | TYK2          | 1 | 1.033898305 |
| ENSG00000105401 | CDC37         | 1 | 0.340699816 |
| ENSG00000105428 | ZNRF4         | 1 | 0.340699816 |
| ENSG00000105497 | ZNF175        | 1 | 1.033519553 |
| ENSG00000105518 | TMEM205       | 1 | 0.340699816 |
| ENSG00000105519 | CAPS          | 1 | 0.340699816 |
| ENSG00000105520 | DKFZP761J1410 | 1 | 0.340699816 |
| ENSG00000105523 | FAM83E        | 1 | 1.033519553 |
| ENSG00000105552 | BCAT2         | 1 | 0.340699816 |
| ENSG00000105568 | PPP2R1A       | 1 | 0.340699816 |
| ENSG00000105607 | GCDH          | 1 | 1.033519553 |
| ENSG00000105617 | LENG1         | 1 | 0.340699816 |
| ENSG00000105639 | JAK3          | 1 | 1.033519553 |
| ENSG00000105640 | RPL18A        | 1 | 0.340699816 |
| ENSG00000105643 | ARRDC2        | 1 | 1.033519553 |
| ENSG00000105669 | COPE          | 1 | 1.033519553 |
| ENSG00000105671 | DDX49         | 1 | 1.033519553 |
| ENSG00000105672 | ETV2          | 1 | 0.340699816 |

|                 |          |   |             |
|-----------------|----------|---|-------------|
| ENSG00000105695 | MAG      | 1 | 1.033898305 |
| ENSG00000105738 | SIPA1L3  | 1 | 1.033519553 |
| ENSG00000105793 | GTPBP10  | 1 | 0.340699816 |
| ENSG00000105810 | CDK6     | 1 | 1.033519553 |
| ENSG00000105854 | PON2     | 1 | 0.340699816 |
| ENSG00000105865 | DUS4L    | 1 | 0.340699816 |
| ENSG00000105866 | SP4      | 1 | 0.340699816 |
| ENSG00000105953 | OGDH     | 1 | 0.340699816 |
| ENSG00000105954 | NPVF     | 1 | 1.033519553 |
| ENSG00000105963 | ADAP1    | 1 | 0.340699816 |
| ENSG00000105989 | WNT2     | 1 | 1.033519553 |
| ENSG00000105996 | HOXA2    | 1 | 1.033519553 |
| ENSG00000106012 | IQCE     | 1 | 1.034682081 |
| ENSG00000106049 | HIBADH   | 1 | 0.340699816 |
| ENSG00000106052 | TAX1BP1  | 1 | 0.340699816 |
| ENSG00000106070 | GRB10    | 1 | 0.340699816 |
| ENSG00000106078 | COBL     | 1 | 0.613407821 |
| ENSG00000106100 | NOD1     | 1 | 0.340699816 |
| ENSG00000106105 | GARS     | 1 | 0.340699816 |
| ENSG00000106113 | CRHR2    | 1 | 0.613407821 |
| ENSG00000106258 | CYP3A5   | 1 | 0.340699816 |
| ENSG00000106263 | EIF3B    | 1 | 0.340699816 |
| ENSG00000106278 | PTPRZ1   | 1 | 0.730427764 |
| ENSG00000106304 | SPAM1    | 1 | 1.033519553 |
| ENSG00000106305 | AIMP2    | 1 | 0.340699816 |
| ENSG00000106327 | TFR2     | 1 | 0.795555556 |
| ENSG00000106328 | FSCN3    | 1 | 0.340699816 |
| ENSG00000106336 | FBXO24   | 1 | 1.033519553 |
| ENSG00000106346 | USP42    | 1 | 0.613407821 |
| ENSG00000106384 | MOGAT3   | 1 | 1.033519553 |
| ENSG00000106410 | NOBOX    | 1 | 1.033519553 |
| ENSG00000106477 | CEP41    | 1 | 1.033519553 |
| ENSG00000106538 | RARRES2  | 1 | 0.340699816 |
| ENSG00000106546 | AHR      | 1 | 1.033519553 |
| ENSG00000106560 | GIMAP2   | 1 | 0.730427764 |
| ENSG00000106565 | TMEM176B | 1 | 1.033898305 |
| ENSG00000106571 | GLI3     | 1 | 0.613407821 |
| ENSG00000106605 | BLVRA    | 1 | 0.340699816 |
| ENSG00000106617 | PRKAG2   | 1 | 0.340699816 |
| ENSG00000106636 | YKT6     | 1 | 0.340699816 |
| ENSG00000106665 | CLIP2    | 1 | 1.033519553 |
| ENSG00000106686 | SPATA6L  | 1 | 0.340699816 |
| ENSG00000106688 | SLC1A1   | 1 | 1.033519553 |
| ENSG00000106733 | NMRK1    | 1 | 0.340699816 |
| ENSG00000106771 | TMEM245  | 1 | 1.033519553 |
| ENSG00000106785 | TRIM14   | 1 | 1.033519553 |
| ENSG00000106823 | ECM2     | 1 | 0.613407821 |

|                 |          |   |             |
|-----------------|----------|---|-------------|
| ENSG00000106852 | LHX6     | 1 | 0.340699816 |
| ENSG00000106868 | SUSD1    | 1 | 0.613407821 |
| ENSG00000106948 | AKNA     | 1 | 1.034285714 |
| ENSG00000106991 | ENG      | 1 | 0.340699816 |
| ENSG00000107014 | RLN2     | 1 | 1.033519553 |
| ENSG00000107021 | TBC1D13  | 1 | 0.340699816 |
| ENSG00000107147 | KCNT1    | 1 | 1.033519553 |
| ENSG00000107187 | LHX3     | 1 | 0.340699816 |
| ENSG00000107362 | ABHD17B  | 1 | 0.340699816 |
| ENSG00000107438 | PDLIM1   | 1 | 0.340699816 |
| ENSG00000107554 | DNMBP    | 1 | 0.613407821 |
| ENSG00000107562 | CXCL12   | 1 | 1.033519553 |
| ENSG00000107581 | EIF3A    | 1 | 1.034285714 |
| ENSG00000107614 | TRDMT1   | 1 | 0.340699816 |
| ENSG00000107625 | DDX50    | 1 | 0.340699816 |
| ENSG00000107669 | ATE1     | 1 | 0.340699816 |
| ENSG00000107679 | PLEKHA1  | 1 | 0.340699816 |
| ENSG00000107745 | MICU1    | 1 | 0.340699816 |
| ENSG00000107833 | NPM3     | 1 | 0.340699816 |
| ENSG00000107862 | GBF1     | 1 | 0.340699816 |
| ENSG00000107863 | ARHGAP21 | 1 | 0.613407821 |
| ENSG00000107882 | SUFU     | 1 | 1.033519553 |
| ENSG00000107902 | LHPP     | 1 | 0.340699816 |
| ENSG00000107938 | EDRF1    | 1 | 1.033519553 |
| ENSG00000107949 | BCCIP    | 1 | 0.613407821 |
| ENSG00000107957 | SH3PXD2A | 1 | 1.033519553 |
| ENSG00000107959 | PITRM1   | 1 | 0.340699816 |
| ENSG00000107960 | OBFC1    | 1 | 0.340699816 |
| ENSG00000107984 | DKK1     | 1 | 1.033519553 |
| ENSG00000108018 | SORCS1   | 1 | 0.730427764 |
| ENSG00000108021 | FAM208B  | 1 | 1.034682081 |
| ENSG00000108064 | TFAM     | 1 | 0.340699816 |
| ENSG00000108094 | CUL2     | 1 | 0.340699816 |
| ENSG00000108244 | KRT23    | 1 | 0.340699816 |
| ENSG00000108389 | MTMR4    | 1 | 1.033898305 |
| ENSG00000108465 | CDK5RAP3 | 1 | 0.340699816 |
| ENSG00000108474 | PIGL     | 1 | 1.033519553 |
| ENSG00000108506 | INTS2    | 1 | 1.033519553 |
| ENSG00000108509 | CAMTA2   | 1 | 1.033519553 |
| ENSG00000108515 | ENO3     | 1 | 0.340699816 |
| ENSG00000108523 | RNF167   | 1 | 0.613407821 |
| ENSG00000108528 | SLC25A11 | 1 | 1.033519553 |
| ENSG00000108551 | RASD1    | 1 | 0.340699816 |
| ENSG00000108557 | RAI1     | 1 | 1.033519553 |
| ENSG00000108576 | SLC6A4   | 1 | 1.033898305 |
| ENSG00000108592 | FTSJ3    | 1 | 1.033519553 |
| ENSG00000108641 | B9D1     | 1 | 1.033519553 |

|                 |          |   |             |
|-----------------|----------|---|-------------|
| ENSG00000108679 | LGALS3BP | 1 | 0.340699816 |
| ENSG00000108684 | ASIC2    | 1 | 0.340699816 |
| ENSG00000108688 | CCL7     | 1 | 0.340699816 |
| ENSG00000108759 | KRT32    | 1 | 0.340699816 |
| ENSG00000108771 | DHX58    | 1 | 1.033519553 |
| ENSG00000108773 | KAT2A    | 1 | 1.033519553 |
| ENSG00000108797 | CNTNAP1  | 1 | 1.033519553 |
| ENSG00000108799 | EZH1     | 1 | 0.340699816 |
| ENSG00000108813 | DLX4     | 1 | 0.340699816 |
| ENSG00000108826 | MRPL27   | 1 | 1.033519553 |
| ENSG00000108839 | ALOX12   | 1 | 0.340699816 |
| ENSG00000108848 | LUC7L3   | 1 | 1.033519553 |
| ENSG00000109046 | WSB1     | 1 | 0.340699816 |
| ENSG00000109062 | SLC9A3R1 | 1 | 0.340699816 |
| ENSG00000109063 | MYH3     | 1 | 0.730427764 |
| ENSG00000109099 | PMP22    | 1 | 1.033519553 |
| ENSG00000109111 | SUPT6H   | 1 | 1.033519553 |
| ENSG00000109118 | PHF12    | 1 | 0.340699816 |
| ENSG00000109181 | UGT2B10  | 1 | 0.613407821 |
| ENSG00000109193 | SULT1E1  | 1 | 0.340699816 |
| ENSG00000109511 | ANXA10   | 1 | 1.033519553 |
| ENSG00000109625 | CPZ      | 1 | 0.837099317 |
| ENSG00000109654 | TRIM2    | 1 | 0.340699816 |
| ENSG00000109743 | BST1     | 1 | 1.033519553 |
| ENSG00000109758 | HGFAC    | 1 | 0.340699816 |
| ENSG00000109805 | NCAPG    | 1 | 1.033898305 |
| ENSG00000109814 | UGDH     | 1 | 1.033519553 |
| ENSG00000109832 | DDX25    | 1 | 1.033519553 |
| ENSG00000109846 | CRYAB    | 1 | 1.033519553 |
| ENSG00000109881 | CCDC34   | 1 | 0.340699816 |
| ENSG00000109991 | P2RX3    | 1 | 0.340699816 |
| ENSG00000110042 | DTX4     | 1 | 0.340699816 |
| ENSG00000110046 | ATG2A    | 1 | 1.033519553 |
| ENSG00000110057 | UNC93B1  | 1 | 1.033519553 |
| ENSG00000110060 | PUS3     | 1 | 1.033519553 |
| ENSG00000110063 | DCPS     | 1 | 0.730427764 |
| ENSG00000110066 | SUV420H1 | 1 | 1.033519553 |
| ENSG00000110074 | FOXRED1  | 1 | 1.033519553 |
| ENSG00000110076 | NRXN2    | 1 | 1.033519553 |
| ENSG00000110077 | MS4A6A   | 1 | 0.340699816 |
| ENSG00000110108 | TMEM109  | 1 | 0.340699816 |
| ENSG00000110324 | IL10RA   | 1 | 1.033519553 |
| ENSG00000110395 | CBL      | 1 | 0.340699816 |
| ENSG00000110446 | SLC15A3  | 1 | 0.340699816 |
| ENSG00000110455 | ACCS     | 1 | 0.613407821 |
| ENSG00000110514 | MADD     | 1 | 0.730427764 |
| ENSG00000110651 | CD81     | 1 | 1.033519553 |

|                 |           |   |             |
|-----------------|-----------|---|-------------|
| ENSG00000110713 | NUP98     | 1 | 0.613407821 |
| ENSG00000110719 | TCIRG1    | 1 | 1.033898305 |
| ENSG00000110801 | PSMD9     | 1 | 1.033519553 |
| ENSG00000110844 | PRPF40B   | 1 | 0.340699816 |
| ENSG00000110848 | CD69      | 1 | 0.340699816 |
| ENSG00000110851 | PRDM4     | 1 | 0.340699816 |
| ENSG00000110852 | CLEC2B    | 1 | 0.340699816 |
| ENSG00000110911 | SLC11A2   | 1 | 1.033519553 |
| ENSG00000110931 | CAMKK2    | 1 | 1.033519553 |
| ENSG00000110975 | SYT10     | 1 | 1.033519553 |
| ENSG00000111077 | TENC1     | 1 | 0.613407821 |
| ENSG00000111144 | LTA4H     | 1 | 0.340699816 |
| ENSG00000111231 | GPN3      | 1 | 0.340699816 |
| ENSG00000111247 | RAD51AP1  | 1 | 1.033519553 |
| ENSG00000111254 | AKAP3     | 1 | 0.340699816 |
| ENSG00000111319 | SCNN1A    | 1 | 0.340699816 |
| ENSG00000111325 | OGFOD2    | 1 | 0.340699816 |
| ENSG00000111331 | OAS3      | 1 | 0.613407821 |
| ENSG00000111339 | ART4      | 1 | 1.033519553 |
| ENSG00000111348 | ARHGDI3   | 1 | 0.340699816 |
| ENSG00000111364 | DDX55     | 1 | 1.033519553 |
| ENSG00000111405 | ENDOU     | 1 | 1.033519553 |
| ENSG00000111490 | TBC1D30   | 1 | 1.033519553 |
| ENSG00000111536 | IL26      | 1 | 0.340699816 |
| ENSG00000111641 | NOP2      | 1 | 1.033519553 |
| ENSG00000111644 | ACRBP     | 1 | 1.033519553 |
| ENSG00000111647 | UHRF1BP1L | 1 | 1.033519553 |
| ENSG00000111666 | CHPT1     | 1 | 0.340699816 |
| ENSG00000111669 | TPI1      | 1 | 1.033519553 |
| ENSG00000111670 | GNPTAB    | 1 | 0.613407821 |
| ENSG00000111671 | SPSB2     | 1 | 1.033519553 |
| ENSG00000111676 | ATN1      | 1 | 0.340699816 |
| ENSG00000111679 | PTPN6     | 1 | 1.033519553 |
| ENSG00000111725 | PRKAB1    | 1 | 0.340699816 |
| ENSG00000111727 | HCFC2     | 1 | 0.340699816 |
| ENSG00000111785 | RIC8B     | 1 | 0.340699816 |
| ENSG00000111834 | RSPH4A    | 1 | 1.033519553 |
| ENSG00000111846 | GCNT2     | 1 | 0.340699816 |
| ENSG00000111863 | ADTRP     | 1 | 1.033519553 |
| ENSG00000111886 | GABRR2    | 1 | 1.033898305 |
| ENSG00000111911 | HINT3     | 1 | 0.340699816 |
| ENSG00000111913 | FAM65B    | 1 | 1.033898305 |
| ENSG00000111962 | UST       | 1 | 0.340699816 |
| ENSG00000112029 | FBXO5     | 1 | 0.340699816 |
| ENSG00000112041 | TULP1     | 1 | 0.613407821 |
| ENSG00000112053 | SLC26A8   | 1 | 0.613407821 |
| ENSG00000112096 | SOD2      | 1 | 0.340699816 |

|                 |          |   |             |
|-----------------|----------|---|-------------|
| ENSG00000112116 | IL17F    | 1 | 0.340699816 |
| ENSG00000112137 | PHACTR1  | 1 | 0.340699816 |
| ENSG00000112139 | MDGA1    | 1 | 1.033519553 |
| ENSG00000112159 | MDN1     | 1 | 0.730427764 |
| ENSG00000112182 | BACH2    | 1 | 1.033898305 |
| ENSG00000112195 | TREML2   | 1 | 1.033898305 |
| ENSG00000112210 | RAB23    | 1 | 1.033898305 |
| ENSG00000112218 | GPR63    | 1 | 0.340699816 |
| ENSG00000112234 | FBXL4    | 1 | 1.033519553 |
| ENSG00000112246 | SIM1     | 1 | 0.340699816 |
| ENSG00000112249 | ASCC3    | 1 | 1.033519553 |
| ENSG00000112294 | ALDH5A1  | 1 | 0.613407821 |
| ENSG00000112299 | VNN1     | 1 | 0.613407821 |
| ENSG00000112305 | SMAP1    | 1 | 1.033519553 |
| ENSG00000112312 | GMNN     | 1 | 0.340699816 |
| ENSG00000112337 | SLC17A2  | 1 | 1.033519553 |
| ENSG00000112339 | HBS1L    | 1 | 0.730427764 |
| ENSG00000112499 | SLC22A2  | 1 | 1.033519553 |
| ENSG00000112584 | FAM120B  | 1 | 0.340699816 |
| ENSG00000112706 | IMPG1    | 1 | 1.033519553 |
| ENSG00000112739 | PRPF4B   | 1 | 1.033519553 |
| ENSG00000112759 | SLC29A1  | 1 | 1.033519553 |
| ENSG00000112796 | ENPP5    | 1 | 0.613407821 |
| ENSG00000112799 | LY86     | 1 | 1.033519553 |
| ENSG00000112874 | NUDT12   | 1 | 1.033519553 |
| ENSG00000112877 | CEP72    | 1 | 0.340699816 |
| ENSG00000112964 | GHR      | 1 | 1.033898305 |
| ENSG00000112977 | DAP      | 1 | 0.340699816 |
| ENSG00000112984 | KIF20A   | 1 | 1.034682081 |
| ENSG00000113083 | LOX      | 1 | 1.033519553 |
| ENSG00000113163 | COL4A3BP | 1 | 0.340699816 |
| ENSG00000113205 | PCDHB3   | 1 | 0.340699816 |
| ENSG00000113212 | PCDHB7   | 1 | 1.033519553 |
| ENSG00000113240 | CLK4     | 1 | 0.340699816 |
| ENSG00000113262 | GRM6     | 1 | 0.613407821 |
| ENSG00000113263 | ITK      | 1 | 1.033519553 |
| ENSG00000113296 | THBS4    | 1 | 1.033519553 |
| ENSG00000113303 | BTNL8    | 1 | 1.033519553 |
| ENSG00000113312 | TTC1     | 1 | 1.033519553 |
| ENSG00000113319 | RASGRF2  | 1 | 1.033519553 |
| ENSG00000113407 | TARS     | 1 | 0.340699816 |
| ENSG00000113456 | RAD1     | 1 | 0.340699816 |
| ENSG00000113460 | BRIX1    | 1 | 0.340699816 |
| ENSG00000113522 | RAD50    | 1 | 0.730427764 |
| ENSG00000113580 | NR3C1    | 1 | 1.033519553 |
| ENSG00000113583 | C5orf15  | 1 | 0.340699816 |
| ENSG00000113594 | LIFR     | 1 | 1.033519553 |

|                 |            |   |             |
|-----------------|------------|---|-------------|
| ENSG00000113597 | TRAPPC13   | 1 | 0.340699816 |
| ENSG00000113643 | RARS       | 1 | 1.033519553 |
| ENSG00000113657 | DPYSL3     | 1 | 0.340699816 |
| ENSG00000113712 | CSNK1A1    | 1 | 0.340699816 |
| ENSG00000113716 | HMGXB3     | 1 | 0.340699816 |
| ENSG00000113721 | PDGFRB     | 1 | 1.033519553 |
| ENSG00000113790 | EHHADH     | 1 | 0.340699816 |
| ENSG00000113851 | CRBN       | 1 | 1.033519553 |
| ENSG00000113889 | KNG1       | 1 | 0.340699816 |
| ENSG00000113905 | HRG        | 1 | 0.613407821 |
| ENSG00000113924 | HGD        | 1 | 0.613407821 |
| ENSG00000113946 | CLDN16     | 1 | 0.613407821 |
| ENSG00000114013 | CD86       | 1 | 0.340699816 |
| ENSG00000114124 | GRK7       | 1 | 1.033519553 |
| ENSG00000114127 | XRN1       | 1 | 1.033519553 |
| ENSG00000114209 | PDCD10     | 1 | 0.340699816 |
| ENSG00000114248 | LRRC31     | 1 | 1.033519553 |
| ENSG00000114270 | COL7A1     | 1 | 0.795555556 |
| ENSG00000114302 | PRKAR2A    | 1 | 0.340699816 |
| ENSG00000114316 | USP4       | 1 | 1.033898305 |
| ENSG00000114346 | ECT2       | 1 | 1.033519553 |
| ENSG00000114405 | C3orf14    | 1 | 0.340699816 |
| ENSG00000114480 | GBE1       | 1 | 0.730427764 |
| ENSG00000114487 | MORC1      | 1 | 1.033898305 |
| ENSG00000114529 | C3orf52    | 1 | 1.033898305 |
| ENSG00000114554 | PLXNA1     | 1 | 1.034285714 |
| ENSG00000114686 | MRPL3      | 1 | 1.033519553 |
| ENSG00000114738 | MAPKAPK3   | 1 | 0.340699816 |
| ENSG00000114739 | ACVR2B     | 1 | 1.033519553 |
| ENSG00000114770 | ABCC5      | 1 | 0.340699816 |
| ENSG00000114771 | AADAC      | 1 | 1.033519553 |
| ENSG00000114796 | KLHL24     | 1 | 0.340699816 |
| ENSG00000114857 | NKTR       | 1 | 1.033898305 |
| ENSG00000114859 | CLCN2      | 1 | 0.340699816 |
| ENSG00000115073 | ACTR1B     | 1 | 1.033519553 |
| ENSG00000115107 | STEAP3     | 1 | 1.033898305 |
| ENSG00000115234 | SNX17      | 1 | 0.340699816 |
| ENSG00000115239 | GPR75-ASB3 | 1 | 1.033519553 |
| ENSG00000115241 | PPM1G      | 1 | 0.340699816 |
| ENSG00000115252 | PDE1A      | 1 | 0.340699816 |
| ENSG00000115263 | GCG        | 1 | 1.033519553 |
| ENSG00000115268 | RPS15      | 1 | 0.340699816 |
| ENSG00000115275 | MOGS       | 1 | 1.033898305 |
| ENSG00000115306 | SPTBN1     | 1 | 1.033519553 |
| ENSG00000115307 | AUP1       | 1 | 0.340699816 |
| ENSG00000115310 | RTN4       | 1 | 0.340699816 |
| ENSG00000115364 | MRPL19     | 1 | 1.033519553 |

|                 |          |   |             |
|-----------------|----------|---|-------------|
| ENSG00000115368 | WDR75    | 1 | 1.033519553 |
| ENSG00000115414 | FN1      | 1 | 1.033898305 |
| ENSG00000115415 | STAT1    | 1 | 0.340699816 |
| ENSG00000115446 | UNC50    | 1 | 1.033519553 |
| ENSG00000115459 | ELMOD3   | 1 | 0.340699816 |
| ENSG00000115486 | GGCX     | 1 | 0.340699816 |
| ENSG00000115488 | NEU2     | 1 | 0.340699816 |
| ENSG00000115514 | TXNDC9   | 1 | 1.033519553 |
| ENSG00000115526 | CHST10   | 1 | 0.340699816 |
| ENSG00000115548 | KDM3A    | 1 | 0.340699816 |
| ENSG00000115556 | PLCD4    | 1 | 0.340699816 |
| ENSG00000115590 | IL1R2    | 1 | 1.033519553 |
| ENSG00000115592 | PRKAG3   | 1 | 0.340699816 |
| ENSG00000115604 | IL18R1   | 1 | 1.033519553 |
| ENSG00000115607 | IL18RAP  | 1 | 0.340699816 |
| ENSG00000115685 | PPP1R7   | 1 | 0.340699816 |
| ENSG00000115816 | CEBPZ    | 1 | 0.730427764 |
| ENSG00000115841 | RMDN2    | 1 | 1.033898305 |
| ENSG00000115850 | LCT      | 1 | 0.340699816 |
| ENSG00000115866 | DARS     | 1 | 0.340699816 |
| ENSG00000115884 | SDC1     | 1 | 0.340699816 |
| ENSG00000115902 | SLC1A4   | 1 | 1.033519553 |
| ENSG00000115904 | SOS1     | 1 | 1.033519553 |
| ENSG00000115946 | PNO1     | 1 | 0.340699816 |
| ENSG00000115993 | TRAK2    | 1 | 1.033519553 |
| ENSG00000116001 | TIA1     | 1 | 0.340699816 |
| ENSG00000116016 | EPAS1    | 1 | 1.034285714 |
| ENSG00000116062 | MSH6     | 1 | 0.340699816 |
| ENSG00000116117 | PARD3B   | 1 | 1.033898305 |
| ENSG00000116120 | FARSB    | 1 | 0.340699816 |
| ENSG00000116133 | DHCR24   | 1 | 0.340699816 |
| ENSG00000116138 | DNAJC16  | 1 | 0.340699816 |
| ENSG00000116176 | TPSG1    | 1 | 1.033898305 |
| ENSG00000116183 | PAPPA2   | 1 | 1.033519553 |
| ENSG00000116191 | RALGPS2  | 1 | 1.033519553 |
| ENSG00000116205 | TCEANC2  | 1 | 1.033519553 |
| ENSG00000116209 | TMEM59   | 1 | 0.340699816 |
| ENSG00000116212 | LRRC42   | 1 | 1.033519553 |
| ENSG00000116221 | MRPL37   | 1 | 0.340699816 |
| ENSG00000116260 | QSOX1    | 1 | 1.034285714 |
| ENSG00000116299 | KIAA1324 | 1 | 0.340699816 |
| ENSG00000116396 | KCNC4    | 1 | 1.033519553 |
| ENSG00000116459 | ATP5F1   | 1 | 0.340699816 |
| ENSG00000116525 | TRIM62   | 1 | 0.340699816 |
| ENSG00000116544 | DLGAP3   | 1 | 1.033519553 |
| ENSG00000116584 | ARHGEF2  | 1 | 0.340699816 |
| ENSG00000116661 | FBXO2    | 1 | 0.340699816 |

|                 |          |   |             |
|-----------------|----------|---|-------------|
| ENSG00000116678 | LEPR     | 1 | 0.340699816 |
| ENSG00000116679 | IVNS1ABP | 1 | 0.340699816 |
| ENSG00000116688 | MFN2     | 1 | 1.034285714 |
| ENSG00000116691 | MIIP     | 1 | 0.340699816 |
| ENSG00000116771 | AGMAT    | 1 | 1.033519553 |
| ENSG00000116783 | TNNI3K   | 1 | 1.033519553 |
| ENSG00000116786 | PLEKHM2  | 1 | 0.613407821 |
| ENSG00000116791 | CRYZ     | 1 | 0.340699816 |
| ENSG00000116793 | PHTF1    | 1 | 0.340699816 |
| ENSG00000116809 | ZBTB17   | 1 | 1.033519553 |
| ENSG00000116815 | CD58     | 1 | 0.340699816 |
| ENSG00000116824 | CD2      | 1 | 1.033898305 |
| ENSG00000116830 | TTF2     | 1 | 0.613407821 |
| ENSG00000116863 | ADPRHL2  | 1 | 1.033519553 |
| ENSG00000116918 | TSNAX    | 1 | 0.340699816 |
| ENSG00000116922 | C1orf109 | 1 | 1.033519553 |
| ENSG00000116981 | NT5C1A   | 1 | 0.340699816 |
| ENSG00000116991 | SIPA1L2  | 1 | 0.730427764 |
| ENSG00000117000 | RLF      | 1 | 1.033519553 |
| ENSG00000117010 | ZNF684   | 1 | 1.033898305 |
| ENSG00000117016 | RIMS3    | 1 | 0.340699816 |
| ENSG00000117133 | RPF1     | 1 | 1.034682081 |
| ENSG00000117148 | ACTL8    | 1 | 0.613407821 |
| ENSG00000117215 | PLA2G2D  | 1 | 1.033519553 |
| ENSG00000117226 | GBP3     | 1 | 0.340699816 |
| ENSG00000117228 | GBP1     | 1 | 1.033519553 |
| ENSG00000117266 | CDK18    | 1 | 0.340699816 |
| ENSG00000117298 | ECE1     | 1 | 1.033519553 |
| ENSG00000117305 | HMGCL    | 1 | 0.340699816 |
| ENSG00000117322 | CR2      | 1 | 0.340699816 |
| ENSG00000117335 | CD46     | 1 | 0.340699816 |
| ENSG00000117385 | LEPRE1   | 1 | 1.033898305 |
| ENSG00000117448 | AKR1A1   | 1 | 0.613407821 |
| ENSG00000117525 | F3       | 1 | 0.340699816 |
| ENSG00000117528 | ABCD3    | 1 | 1.033519553 |
| ENSG00000117569 | PTBP2    | 1 | 0.340699816 |
| ENSG00000117586 | TNFSF4   | 1 | 0.340699816 |
| ENSG00000117593 | DARS2    | 1 | 0.340699816 |
| ENSG00000117597 | DIEXF    | 1 | 0.340699816 |
| ENSG00000117602 | RCAN3    | 1 | 1.033519553 |
| ENSG00000117616 | C1orf63  | 1 | 1.033898305 |
| ENSG00000117748 | RPA2     | 1 | 1.033519553 |
| ENSG00000117791 | MARC2    | 1 | 0.340699816 |
| ENSG00000117859 | OSBPL9   | 1 | 0.340699816 |
| ENSG00000117877 | CD3EAP   | 1 | 1.033519553 |
| ENSG00000117906 | RCN2     | 1 | 0.340699816 |
| ENSG00000117971 | CHRN4    | 1 | 1.033898305 |

|                 |          |   |             |
|-----------------|----------|---|-------------|
| ENSG00000118017 | A4GNT    | 1 | 0.340699816 |
| ENSG00000118046 | STK11    | 1 | 0.340699816 |
| ENSG00000118113 | MMP8     | 1 | 0.340699816 |
| ENSG00000118156 | ZNF541   | 1 | 0.340699816 |
| ENSG00000118217 | ATF6     | 1 | 0.340699816 |
| ENSG00000118246 | FASTKD2  | 1 | 0.340699816 |
| ENSG00000118271 | TTR      | 1 | 0.340699816 |
| ENSG00000118369 | USP35    | 1 | 1.033519553 |
| ENSG00000118402 | ELOVL4   | 1 | 1.033519553 |
| ENSG00000118407 | FILIP1   | 1 | 0.613407821 |
| ENSG00000118454 | ANKRD13C | 1 | 1.033519553 |
| ENSG00000118473 | SGIP1    | 1 | 1.033519553 |
| ENSG00000118482 | PHF3     | 1 | 0.613407821 |
| ENSG00000118492 | ADGB     | 1 | 1.033898305 |
| ENSG00000118507 | AKAP7    | 1 | 0.340699816 |
| ENSG00000118705 | RPN2     | 1 | 1.033519553 |
| ENSG00000118733 | OLFM3    | 1 | 1.033519553 |
| ENSG00000118762 | PKD2     | 1 | 1.033519553 |
| ENSG00000118777 | ABCG2    | 1 | 1.033898305 |
| ENSG00000118816 | CCNI     | 1 | 0.340699816 |
| ENSG00000118873 | RAB3GAP2 | 1 | 0.613407821 |
| ENSG00000118997 | DNAH7    | 1 | 1.036363636 |
| ENSG00000119139 | TJP2     | 1 | 1.033519553 |
| ENSG00000119203 | CPSF3    | 1 | 1.033519553 |
| ENSG00000119231 | SENP5    | 1 | 1.033898305 |
| ENSG00000119280 | C1orf198 | 1 | 0.340699816 |
| ENSG00000119283 | TRIM67   | 1 | 1.033519553 |
| ENSG00000119321 | FKBP15   | 1 | 1.033519553 |
| ENSG00000119383 | PPP2R4   | 1 | 0.340699816 |
| ENSG00000119392 | GLE1     | 1 | 1.033519553 |
| ENSG00000119397 | CNTRL    | 1 | 1.034682081 |
| ENSG00000119402 | FBXW2    | 1 | 0.340699816 |
| ENSG00000119408 | NEK6     | 1 | 1.033519553 |
| ENSG00000119411 | BSPRY    | 1 | 0.730427764 |
| ENSG00000119509 | INVS     | 1 | 0.340699816 |
| ENSG00000119522 | DENND1A  | 1 | 1.033519553 |
| ENSG00000119608 | PROX2    | 1 | 0.340699816 |
| ENSG00000119616 | FCF1     | 1 | 1.033519553 |
| ENSG00000119655 | NPC2     | 1 | 1.034285714 |
| ENSG00000119669 | IRF2BPL  | 1 | 0.613407821 |
| ENSG00000119684 | MLH3     | 1 | 1.034285714 |
| ENSG00000119689 | DLST     | 1 | 0.340699816 |
| ENSG00000119715 | ESRRB    | 1 | 0.340699816 |
| ENSG00000119729 | RHOQ     | 1 | 1.033519553 |
| ENSG00000119760 | SUPT7L   | 1 | 1.033519553 |
| ENSG00000119772 | DNMT3A   | 1 | 1.033519553 |
| ENSG00000119778 | ATAD2B   | 1 | 0.340699816 |

|                 |          |   |             |
|-----------------|----------|---|-------------|
| ENSG00000119812 | FAM98A   | 1 | 0.340699816 |
| ENSG00000119844 | AFTPH    | 1 | 1.034285714 |
| ENSG00000119913 | TECTB    | 1 | 0.340699816 |
| ENSG00000119917 | IFIT3    | 1 | 0.613407821 |
| ENSG00000119922 | IFIT2    | 1 | 1.033519553 |
| ENSG00000119927 | GPAM     | 1 | 0.340699816 |
| ENSG00000119943 | PYROXD2  | 1 | 1.033519553 |
| ENSG00000119969 | HELLS    | 1 | 1.033519553 |
| ENSG00000119973 | PRLHR    | 1 | 0.340699816 |
| ENSG00000120008 | WDR11    | 1 | 0.613407821 |
| ENSG00000120049 | KCNIP2   | 1 | 0.340699816 |
| ENSG00000120051 | CCDC147  | 1 | 0.795555556 |
| ENSG00000120054 | CPN1     | 1 | 0.340699816 |
| ENSG00000120063 | GNA13    | 1 | 1.033519553 |
| ENSG00000120094 | HOXB1    | 1 | 0.340699816 |
| ENSG00000120211 | INSL4    | 1 | 0.340699816 |
| ENSG00000120217 | CD274    | 1 | 0.613407821 |
| ENSG00000120265 | PCMT1    | 1 | 0.340699816 |
| ENSG00000120279 | MYCT1    | 1 | 0.340699816 |
| ENSG00000120289 | MAGEB4   | 1 | 0.340699816 |
| ENSG00000120314 | WDR55    | 1 | 0.340699816 |
| ENSG00000120318 | ARAP3    | 1 | 0.613407821 |
| ENSG00000120332 | TNN      | 1 | 1.033519553 |
| ENSG00000120594 | PLXDC2   | 1 | 0.340699816 |
| ENSG00000120616 | EPC1     | 1 | 0.613407821 |
| ENSG00000120645 | IQSEC3   | 1 | 0.340699816 |
| ENSG00000120656 | TAF12    | 1 | 0.340699816 |
| ENSG00000120658 | ENOX1    | 1 | 0.340699816 |
| ENSG00000120675 | DNAJC15  | 1 | 0.340699816 |
| ENSG00000120690 | ELF1     | 1 | 0.340699816 |
| ENSG00000120699 | EXOSC8   | 1 | 0.340699816 |
| ENSG00000120729 | MYOT     | 1 | 1.033519553 |
| ENSG00000120756 | PLS1     | 1 | 0.730427764 |
| ENSG00000120798 | NR2C1    | 1 | 0.340699816 |
| ENSG00000120899 | PTK2B    | 1 | 0.730427764 |
| ENSG00000120913 | PDLIM2   | 1 | 1.033519553 |
| ENSG00000120948 | TARDBP   | 1 | 0.340699816 |
| ENSG00000121039 | RDH10    | 1 | 0.340699816 |
| ENSG00000121060 | TRIM25   | 1 | 0.613407821 |
| ENSG00000121207 | LRAT     | 1 | 0.340699816 |
| ENSG00000121210 | KIAA0922 | 1 | 0.795555556 |
| ENSG00000121274 | PAPD5    | 1 | 1.033519553 |
| ENSG00000121281 | ADCY7    | 1 | 1.034682081 |
| ENSG00000121289 | CEP89    | 1 | 1.034285714 |
| ENSG00000121297 | TSHZ3    | 1 | 1.033519553 |
| ENSG00000121440 | PDZRN3   | 1 | 0.613407821 |
| ENSG00000121486 | TRMT1L   | 1 | 0.340699816 |

|                 |          |   |             |
|-----------------|----------|---|-------------|
| ENSG00000121552 | CSTA     | 1 | 1.033519553 |
| ENSG00000121634 | GJA8     | 1 | 1.033519553 |
| ENSG00000121691 | CAT      | 1 | 0.340699816 |
| ENSG00000121743 | GJA3     | 1 | 1.033519553 |
| ENSG00000121764 | HCRTR1   | 1 | 1.033519553 |
| ENSG00000121864 | ZNF639   | 1 | 0.340699816 |
| ENSG00000121895 | TMEM156  | 1 | 0.340699816 |
| ENSG00000121964 | GTDC1    | 1 | 0.340699816 |
| ENSG00000122008 | POLK     | 1 | 0.613407821 |
| ENSG00000122121 | XPNPEP2  | 1 | 1.033519553 |
| ENSG00000122223 | CD244    | 1 | 1.033519553 |
| ENSG00000122224 | LY9      | 1 | 1.033519553 |
| ENSG00000122390 | NAA60    | 1 | 0.340699816 |
| ENSG00000122417 | ODF2L    | 1 | 1.033898305 |
| ENSG00000122420 | PTGFR    | 1 | 1.033898305 |
| ENSG00000122482 | ZNF644   | 1 | 1.034285714 |
| ENSG00000122490 | PQLC1    | 1 | 1.033519553 |
| ENSG00000122507 | BBS9     | 1 | 1.034285714 |
| ENSG00000122515 | ZMIZ2    | 1 | 1.033898305 |
| ENSG00000122557 | HERPUD2  | 1 | 0.340699816 |
| ENSG00000122591 | FAM126A  | 1 | 1.033519553 |
| ENSG00000122641 | INHBA    | 1 | 1.033519553 |
| ENSG00000122694 | GLIPR2   | 1 | 0.340699816 |
| ENSG00000122778 | KIAA1549 | 1 | 0.795555556 |
| ENSG00000122861 | PLAU     | 1 | 1.033519553 |
| ENSG00000122862 | SRGN     | 1 | 1.033519553 |
| ENSG00000122965 | RBM19    | 1 | 1.033898305 |
| ENSG00000122966 | CIT      | 1 | 0.730427764 |
| ENSG00000123064 | DDX54    | 1 | 0.613407821 |
| ENSG00000123066 | MED13L   | 1 | 0.730427764 |
| ENSG00000123094 | RASSF8   | 1 | 1.033519553 |
| ENSG00000123119 | NECAB1   | 1 | 1.033519553 |
| ENSG00000123146 | CD97     | 1 | 0.613407821 |
| ENSG00000123165 | ACTRT1   | 1 | 0.340699816 |
| ENSG00000123200 | ZC3H13   | 1 | 1.033519553 |
| ENSG00000123213 | NLN      | 1 | 1.033898305 |
| ENSG00000123219 | CENPK    | 1 | 0.340699816 |
| ENSG00000123297 | TSFM     | 1 | 1.033898305 |
| ENSG00000123307 | NEUROD4  | 1 | 1.033519553 |
| ENSG00000123329 | ARHGAP9  | 1 | 1.033898305 |
| ENSG00000123352 | SPATS2   | 1 | 1.033519553 |
| ENSG00000123358 | NR4A1    | 1 | 0.340699816 |
| ENSG00000123453 | SARDH    | 1 | 0.340699816 |
| ENSG00000123485 | HJURP    | 1 | 1.033898305 |
| ENSG00000123561 | SERPINA7 | 1 | 1.033519553 |
| ENSG00000123572 | NRK      | 1 | 1.033519553 |
| ENSG00000123815 | ADCK4    | 1 | 0.340699816 |

|                 |           |   |             |
|-----------------|-----------|---|-------------|
| ENSG00000123838 | C4BPA     | 1 | 1.033519553 |
| ENSG00000123901 | GPR83     | 1 | 1.033519553 |
| ENSG00000123977 | DAW1      | 1 | 0.340699816 |
| ENSG00000123989 | CHPF      | 1 | 0.340699816 |
| ENSG00000123999 | INHA      | 1 | 1.033898305 |
| ENSG00000124091 | GCNT7     | 1 | 0.613407821 |
| ENSG00000124092 | CTCFL     | 1 | 1.033519553 |
| ENSG00000124120 | TTPAL     | 1 | 0.340699816 |
| ENSG00000124134 | KCNS1     | 1 | 1.033519553 |
| ENSG00000124145 | SDC4      | 1 | 0.340699816 |
| ENSG00000124193 | SRSF6     | 1 | 0.340699816 |
| ENSG00000124196 | GTSF1L    | 1 | 1.033519553 |
| ENSG00000124201 | ZNFX1     | 1 | 0.613407821 |
| ENSG00000124232 | RBPJL     | 1 | 0.340699816 |
| ENSG00000124237 | C20orf85  | 1 | 0.613407821 |
| ENSG00000124253 | PCK1      | 1 | 1.033519553 |
| ENSG00000124279 | FASTKD3   | 1 | 1.033519553 |
| ENSG00000124299 | PEPD      | 1 | 1.033519553 |
| ENSG00000124383 | MPHOSPH10 | 1 | 1.034285714 |
| ENSG00000124466 | LYPD3     | 1 | 0.340699816 |
| ENSG00000124491 | F13A1     | 1 | 1.033519553 |
| ENSG00000124493 | GRM4      | 1 | 0.340699816 |
| ENSG00000124541 | RRP36     | 1 | 1.033519553 |
| ENSG00000124557 | BTN1A1    | 1 | 1.033519553 |
| ENSG00000124613 | ZNF391    | 1 | 0.340699816 |
| ENSG00000124657 | OR2B6     | 1 | 1.033519553 |
| ENSG00000124659 | TBCC      | 1 | 0.340699816 |
| ENSG00000124664 | SPDEF     | 1 | 0.340699816 |
| ENSG00000124688 | MAD2L1BP  | 1 | 0.340699816 |
| ENSG00000124743 | KLHL31    | 1 | 1.033519553 |
| ENSG00000124772 | CPNE5     | 1 | 0.340699816 |
| ENSG00000124783 | SSR1      | 1 | 0.340699816 |
| ENSG00000124786 | SLC35B3   | 1 | 1.033519553 |
| ENSG00000124839 | RAB17     | 1 | 0.340699816 |
| ENSG00000124942 | AHNAK     | 1 | 0.837099317 |
| ENSG00000125089 | SH3TC1    | 1 | 1.033898305 |
| ENSG00000125124 | BBS2      | 1 | 1.033519553 |
| ENSG00000125144 | MT1G      | 1 | 0.340699816 |
| ENSG00000125149 | C16orf70  | 1 | 0.340699816 |
| ENSG00000125170 | DOK4      | 1 | 0.340699816 |
| ENSG00000125246 | CLYBL     | 1 | 0.340699816 |
| ENSG00000125255 | SLC10A2   | 1 | 0.730427764 |
| ENSG00000125378 | BMP4      | 1 | 0.340699816 |
| ENSG00000125384 | PTGER2    | 1 | 1.033898305 |
| ENSG00000125386 | FAM193A   | 1 | 0.340699816 |
| ENSG00000125388 | GRK4      | 1 | 1.033519553 |
| ENSG00000125414 | MYH2      | 1 | 0.340699816 |

|                 |          |   |             |
|-----------------|----------|---|-------------|
| ENSG00000125434 | SLC25A35 | 1 | 0.340699816 |
| ENSG00000125447 | GGA3     | 1 | 1.033519553 |
| ENSG00000125459 | MSTO1    | 1 | 0.340699816 |
| ENSG00000125498 | KIR2DL1  | 1 | 1.033519553 |
| ENSG00000125510 | OPRL1    | 1 | 0.340699816 |
| ENSG00000125648 | SLC25A23 | 1 | 0.340699816 |
| ENSG00000125686 | MED1     | 1 | 1.033519553 |
| ENSG00000125730 | C3       | 1 | 1.033519553 |
| ENSG00000125734 | GPR108   | 1 | 1.033519553 |
| ENSG00000125744 | RTN2     | 1 | 0.613407821 |
| ENSG00000125753 | VASP     | 1 | 0.340699816 |
| ENSG00000125755 | SYMPK    | 1 | 0.340699816 |
| ENSG00000125780 | TGM3     | 1 | 0.340699816 |
| ENSG00000125798 | FOXA2    | 1 | 1.033519553 |
| ENSG00000125812 | GZF1     | 1 | 0.340699816 |
| ENSG00000125818 | PSMF1    | 1 | 1.033519553 |
| ENSG00000125846 | ZNF133   | 1 | 1.033898305 |
| ENSG00000125863 | MKKS     | 1 | 0.613407821 |
| ENSG00000125864 | BFSP1    | 1 | 1.033519553 |
| ENSG00000125877 | ITPA     | 1 | 0.340699816 |
| ENSG00000125895 | TMEM74B  | 1 | 1.033519553 |
| ENSG00000125903 | DEFB129  | 1 | 0.340699816 |
| ENSG00000125966 | MMP24    | 1 | 1.033519553 |
| ENSG00000125970 | RALY     | 1 | 1.033898305 |
| ENSG00000125995 | ROMO1    | 1 | 0.340699816 |
| ENSG00000125998 | FAM83C   | 1 | 0.613407821 |
| ENSG00000125999 | BPIFB1   | 1 | 1.033519553 |
| ENSG00000126001 | CEP250   | 1 | 1.033898305 |
| ENSG00000126003 | PLAGL2   | 1 | 1.033519553 |
| ENSG00000126088 | UROD     | 1 | 1.033519553 |
| ENSG00000126246 | IGFLR1   | 1 | 0.730427764 |
| ENSG00000126259 | KIRREL2  | 1 | 1.033898305 |
| ENSG00000126368 | NR1D1    | 1 | 1.033519553 |
| ENSG00000126453 | BCL2L12  | 1 | 0.340699816 |
| ENSG00000126458 | RRAS     | 1 | 0.340699816 |
| ENSG00000126467 | TSKS     | 1 | 0.340699816 |
| ENSG00000126705 | AHDC1    | 1 | 0.340699816 |
| ENSG00000126759 | CFP      | 1 | 0.340699816 |
| ENSG00000126787 | DLGAP5   | 1 | 0.613407821 |
| ENSG00000126803 | HSPA2    | 1 | 0.340699816 |
| ENSG00000126878 | AIF1L    | 1 | 0.340699816 |
| ENSG00000126882 | FAM78A   | 1 | 1.033519553 |
| ENSG00000126952 | NXF5     | 1 | 0.340699816 |
| ENSG00000127080 | IPPK     | 1 | 0.613407821 |
| ENSG00000127081 | ZNF484   | 1 | 0.730427764 |
| ENSG00000127083 | OMD      | 1 | 1.033898305 |
| ENSG00000127084 | FGD3     | 1 | 0.340699816 |

|                 |          |   |             |
|-----------------|----------|---|-------------|
| ENSG00000127191 | TRAF2    | 1 | 0.340699816 |
| ENSG00000127249 | ATP13A4  | 1 | 0.340699816 |
| ENSG00000127311 | HELB     | 1 | 0.613407821 |
| ENSG00000127328 | RAB3IP   | 1 | 0.340699816 |
| ENSG00000127364 | TAS2R4   | 1 | 1.033519553 |
| ENSG00000127415 | IDUA     | 1 | 0.340699816 |
| ENSG00000127419 | TMEM175  | 1 | 0.613407821 |
| ENSG00000127452 | FBXL12   | 1 | 1.033519553 |
| ENSG00000127481 | UBR4     | 1 | 1.034682081 |
| ENSG00000127533 | F2RL3    | 1 | 0.340699816 |
| ENSG00000127580 | WDR24    | 1 | 0.340699816 |
| ENSG00000127586 | CHTF18   | 1 | 0.340699816 |
| ENSG00000127720 | METTL25  | 1 | 0.340699816 |
| ENSG00000127870 | RNF6     | 1 | 1.033898305 |
| ENSG00000127914 | AKAP9    | 1 | 0.916427432 |
| ENSG00000127947 | PTPN12   | 1 | 1.033519553 |
| ENSG00000127951 | FGL2     | 1 | 0.340699816 |
| ENSG00000127952 | STYXL1   | 1 | 0.340699816 |
| ENSG00000127955 | GNAI1    | 1 | 1.033519553 |
| ENSG00000127989 | MTERF    | 1 | 0.613407821 |
| ENSG00000128000 | ZNF780B  | 1 | 0.340699816 |
| ENSG00000128052 | KDR      | 1 | 0.730427764 |
| ENSG00000128191 | DGCR8    | 1 | 0.613407821 |
| ENSG00000128242 | GAL3ST1  | 1 | 0.340699816 |
| ENSG00000128253 | RFPL2    | 1 | 1.033519553 |
| ENSG00000128284 | APOL3    | 1 | 0.613407821 |
| ENSG00000128313 | APOL5    | 1 | 0.340699816 |
| ENSG00000128335 | APOL2    | 1 | 0.340699816 |
| ENSG00000128383 | APOBEC3A | 1 | 0.340699816 |
| ENSG00000128394 | APOBEC3F | 1 | 0.340699816 |
| ENSG00000128510 | CPA4     | 1 | 0.613407821 |
| ENSG00000128512 | DOCK4    | 1 | 1.033898305 |
| ENSG00000128524 | ATP6V1F  | 1 | 0.340699816 |
| ENSG00000128596 | CCDC136  | 1 | 1.033519553 |
| ENSG00000128602 | SMO      | 1 | 0.613407821 |
| ENSG00000128610 | FEZF1    | 1 | 1.033519553 |
| ENSG00000128645 | HOXD1    | 1 | 0.340699816 |
| ENSG00000128731 | HERC2    | 1 | 1.034682081 |
| ENSG00000128802 | GDF2     | 1 | 1.033519553 |
| ENSG00000128833 | MYO5C    | 1 | 0.730427764 |
| ENSG00000128881 | TTBK2    | 1 | 0.340699816 |
| ENSG00000128917 | DLL4     | 1 | 0.340699816 |
| ENSG00000128928 | IVD      | 1 | 0.340699816 |
| ENSG00000128965 | CHAC1    | 1 | 0.340699816 |
| ENSG00000129007 | CALML4   | 1 | 0.340699816 |
| ENSG00000129158 | SERGEF   | 1 | 0.340699816 |
| ENSG00000129187 | DCTD     | 1 | 0.340699816 |

|                 |          |   |             |
|-----------------|----------|---|-------------|
| ENSG00000129197 | RPAIN    | 1 | 0.340699816 |
| ENSG00000129204 | USP6     | 1 | 1.034285714 |
| ENSG00000129226 | CD68     | 1 | 0.340699816 |
| ENSG00000129255 | MPDU1    | 1 | 0.340699816 |
| ENSG00000129437 | KLK14    | 1 | 1.033519553 |
| ENSG00000129455 | KLK8     | 1 | 1.033519553 |
| ENSG00000129460 | NGDN     | 1 | 0.340699816 |
| ENSG00000129473 | BCL2L2   | 1 | 1.033519553 |
| ENSG00000129493 | HEATR5A  | 1 | 0.795555556 |
| ENSG00000129514 | FOXA1    | 1 | 0.340699816 |
| ENSG00000129518 | EAPP     | 1 | 0.340699816 |
| ENSG00000129534 | MIS18BP1 | 1 | 1.033898305 |
| ENSG00000129595 | EPB41L4A | 1 | 1.034682081 |
| ENSG00000129596 | CDO1     | 1 | 0.340699816 |
| ENSG00000129646 | QRICH2   | 1 | 1.033898305 |
| ENSG00000129691 | ASH2L    | 1 | 0.340699816 |
| ENSG00000129744 | ART1     | 1 | 0.340699816 |
| ENSG00000129749 | CHRNA10  | 1 | 0.613407821 |
| ENSG00000129946 | SHC2     | 1 | 0.340699816 |
| ENSG00000130023 | ERMARD   | 1 | 1.034682081 |
| ENSG00000130032 | PRRG3    | 1 | 0.340699816 |
| ENSG00000130119 | GNL3L    | 1 | 1.033519553 |
| ENSG00000130158 | DOCK6    | 1 | 0.340699816 |
| ENSG00000130202 | PVRL2    | 1 | 1.033519553 |
| ENSG00000130203 | APOE     | 1 | 0.340699816 |
| ENSG00000130224 | LRCH2    | 1 | 0.340699816 |
| ENSG00000130244 | FAM98C   | 1 | 0.340699816 |
| ENSG00000130305 | NSUN5    | 1 | 1.033519553 |
| ENSG00000130307 | USHBP1   | 1 | 0.613407821 |
| ENSG00000130312 | MRPL34   | 1 | 0.340699816 |
| ENSG00000130340 | SNX9     | 1 | 1.033519553 |
| ENSG00000130348 | QRSL1    | 1 | 1.033519553 |
| ENSG00000130349 | C6orf203 | 1 | 0.340699816 |
| ENSG00000130382 | MLLT1    | 1 | 0.340699816 |
| ENSG00000130385 | BMP15    | 1 | 0.340699816 |
| ENSG00000130402 | ACTN4    | 1 | 1.033519553 |
| ENSG00000130427 | EPO      | 1 | 1.033519553 |
| ENSG00000130429 | ARPC1B   | 1 | 0.340699816 |
| ENSG00000130479 | MAP1S    | 1 | 0.730427764 |
| ENSG00000130487 | KLHDC7B  | 1 | 1.033519553 |
| ENSG00000130518 | KIAA1683 | 1 | 0.795555556 |
| ENSG00000130560 | UBAC1    | 1 | 0.795555556 |
| ENSG00000130584 | ZBTB46   | 1 | 0.340699816 |
| ENSG00000130589 | HELZ2    | 1 | 0.613407821 |
| ENSG00000130649 | CYP2E1   | 1 | 0.340699816 |
| ENSG00000130653 | PNPLA7   | 1 | 0.730427764 |
| ENSG00000130669 | PAK4     | 1 | 0.613407821 |

|                 |         |   |             |
|-----------------|---------|---|-------------|
| ENSG00000130695 | CEP85   | 1 | 0.340699816 |
| ENSG00000130702 | LAMA5   | 1 | 0.865946919 |
| ENSG00000130713 | EXOSC2  | 1 | 0.340699816 |
| ENSG00000130726 | TRIM28  | 1 | 0.340699816 |
| ENSG00000130764 | LRRRC47 | 1 | 1.033519553 |
| ENSG00000130803 | ZNF317  | 1 | 1.033898305 |
| ENSG00000130939 | UBE4B   | 1 | 0.340699816 |
| ENSG00000130940 | CASZ1   | 1 | 1.034285714 |
| ENSG00000130943 | PKDREJ  | 1 | 0.887179487 |
| ENSG00000131023 | LATS1   | 1 | 0.613407821 |
| ENSG00000131037 | EPS8L1  | 1 | 1.033519553 |
| ENSG00000131042 | LILRB2  | 1 | 0.340699816 |
| ENSG00000131043 | AAR2    | 1 | 0.340699816 |
| ENSG00000131059 | BPIFA3  | 1 | 1.033519553 |
| ENSG00000131068 | DEFB118 | 1 | 0.340699816 |
| ENSG00000131069 | ACSS2   | 1 | 1.033519553 |
| ENSG00000131149 | GSE1    | 1 | 1.033519553 |
| ENSG00000131165 | CHMP1A  | 1 | 0.340699816 |
| ENSG00000131183 | SLC34A1 | 1 | 1.033519553 |
| ENSG00000131196 | NFATC1  | 1 | 0.340699816 |
| ENSG00000131236 | CAP1    | 1 | 0.340699816 |
| ENSG00000131269 | ABCB7   | 1 | 0.613407821 |
| ENSG00000131351 | HAUS8   | 1 | 0.340699816 |
| ENSG00000131379 | C3orf20 | 1 | 0.340699816 |
| ENSG00000131408 | NR1H2   | 1 | 0.340699816 |
| ENSG00000131470 | PSMC3IP | 1 | 0.340699816 |
| ENSG00000131480 | AOC2    | 1 | 0.730427764 |
| ENSG00000131495 | NDUFA2  | 1 | 1.033519553 |
| ENSG00000131558 | EXOC4   | 1 | 0.340699816 |
| ENSG00000131620 | ANO1    | 1 | 1.033519553 |
| ENSG00000131652 | THOC6   | 1 | 0.340699816 |
| ENSG00000131737 | KRT34   | 1 | 1.033519553 |
| ENSG00000131747 | TOP2A   | 1 | 1.033519553 |
| ENSG00000131844 | MCCC2   | 1 | 1.033898305 |
| ENSG00000131864 | USP29   | 1 | 0.613407821 |
| ENSG00000131981 | LGALS3  | 1 | 1.033519553 |
| ENSG00000132003 | ZSWIM4  | 1 | 0.340699816 |
| ENSG00000132004 | FBXW9   | 1 | 0.340699816 |
| ENSG00000132010 | ZNF20   | 1 | 0.340699816 |
| ENSG00000132122 | SPATA6  | 1 | 0.340699816 |
| ENSG00000132128 | LRRRC41 | 1 | 1.033519553 |
| ENSG00000132142 | ACACA   | 1 | 0.340699816 |
| ENSG00000132256 | TRIM5   | 1 | 1.033519553 |
| ENSG00000132259 | CNGA4   | 1 | 0.340699816 |
| ENSG00000132300 | PTCD3   | 1 | 1.033519553 |
| ENSG00000132305 | IMMT    | 1 | 1.033519553 |
| ENSG00000132334 | PTPRE   | 1 | 0.340699816 |

|                 |          |   |             |
|-----------------|----------|---|-------------|
| ENSG00000132359 | RAP1GAP2 | 1 | 0.340699816 |
| ENSG00000132361 | CLUH     | 1 | 0.340699816 |
| ENSG00000132386 | SERPINF1 | 1 | 0.340699816 |
| ENSG00000132394 | EEFSEC   | 1 | 1.033519553 |
| ENSG00000132406 | TMEM128  | 1 | 0.340699816 |
| ENSG00000132429 | POPDC3   | 1 | 0.340699816 |
| ENSG00000132434 | LANCL2   | 1 | 1.033519553 |
| ENSG00000132464 | ENAM     | 1 | 1.033519553 |
| ENSG00000132467 | UTP3     | 1 | 1.033519553 |
| ENSG00000132478 | UNK      | 1 | 0.340699816 |
| ENSG00000132481 | TRIM47   | 1 | 0.340699816 |
| ENSG00000132612 | VPS4A    | 1 | 1.033519553 |
| ENSG00000132635 | PCED1A   | 1 | 0.340699816 |
| ENSG00000132677 | RHBG     | 1 | 0.340699816 |
| ENSG00000132681 | ATP1A4   | 1 | 1.033519553 |
| ENSG00000132688 | NES      | 1 | 1.034682081 |
| ENSG00000132692 | BCAN     | 1 | 0.340699816 |
| ENSG00000132698 | RAB25    | 1 | 1.033519553 |
| ENSG00000132749 | MTL5     | 1 | 1.033519553 |
| ENSG00000132773 | TOE1     | 1 | 1.033519553 |
| ENSG00000132780 | NASP     | 1 | 1.033898305 |
| ENSG00000132792 | CTNBL1   | 1 | 0.340699816 |
| ENSG00000132837 | DMGDH    | 1 | 1.034682081 |
| ENSG00000132950 | ZMYM5    | 1 | 1.033519553 |
| ENSG00000132970 | WASF3    | 1 | 0.340699816 |
| ENSG00000133026 | MYH10    | 1 | 0.613407821 |
| ENSG00000133048 | CHI3L1   | 1 | 0.340699816 |
| ENSG00000133056 | PIK3C2B  | 1 | 1.035502959 |
| ENSG00000133067 | LGR6     | 1 | 1.033898305 |
| ENSG00000133083 | DCLK1    | 1 | 0.340699816 |
| ENSG00000133116 | KL       | 1 | 1.033519553 |
| ENSG00000133121 | STARD13  | 1 | 1.033898305 |
| ENSG00000133135 | RNF128   | 1 | 0.340699816 |
| ENSG00000133275 | CSNK1G2  | 1 | 0.340699816 |
| ENSG00000133313 | CNDP2    | 1 | 1.033519553 |
| ENSG00000133316 | WDR74    | 1 | 0.340699816 |
| ENSG00000133392 | MYH11    | 1 | 1.034285714 |
| ENSG00000133561 | GIMAP6   | 1 | 1.033519553 |
| ENSG00000133619 | KRBA1    | 1 | 0.340699816 |
| ENSG00000133687 | TMTC1    | 1 | 0.340699816 |
| ENSG00000133703 | KRAS     | 1 | 0.340699816 |
| ENSG00000133739 | LRRCC1   | 1 | 1.033519553 |
| ENSG00000133742 | CA1      | 1 | 0.613407821 |
| ENSG00000133773 | CCDC59   | 1 | 1.033519553 |
| ENSG00000133816 | MICAL2   | 1 | 1.035087719 |
| ENSG00000133858 | ZFC3H1   | 1 | 1.033898305 |
| ENSG00000133961 | NUMB     | 1 | 0.340699816 |

|                 |           |   |             |
|-----------------|-----------|---|-------------|
| ENSG00000133962 | CATSPERB  | 1 | 0.340699816 |
| ENSG00000134030 | CTIF      | 1 | 1.033519553 |
| ENSG00000134042 | MRO       | 1 | 1.033519553 |
| ENSG00000134072 | CAMK1     | 1 | 0.340699816 |
| ENSG00000134108 | ARL8B     | 1 | 0.340699816 |
| ENSG00000134183 | GNAT2     | 1 | 1.033519553 |
| ENSG00000134193 | REG4      | 1 | 1.033898305 |
| ENSG00000134201 | GSTM5     | 1 | 0.613407821 |
| ENSG00000134215 | VAV3      | 1 | 1.033519553 |
| ENSG00000134216 | CHIA      | 1 | 1.033519553 |
| ENSG00000134240 | HMGCS2    | 1 | 0.340699816 |
| ENSG00000134242 | PTPN22    | 1 | 1.033519553 |
| ENSG00000134243 | SORT1     | 1 | 0.340699816 |
| ENSG00000134248 | LAMTOR5   | 1 | 1.033519553 |
| ENSG00000134255 | CEPT1     | 1 | 1.033519553 |
| ENSG00000134283 | PPHLN1    | 1 | 1.033519553 |
| ENSG00000134313 | KIDINS220 | 1 | 0.613407821 |
| ENSG00000134321 | RSAD2     | 1 | 0.340699816 |
| ENSG00000134324 | LPIN1     | 1 | 0.340699816 |
| ENSG00000134333 | LDHA      | 1 | 0.340699816 |
| ENSG00000134363 | FST       | 1 | 0.340699816 |
| ENSG00000134369 | NAV1      | 1 | 1.033519553 |
| ENSG00000134375 | TIMM17A   | 1 | 0.340699816 |
| ENSG00000134389 | CFHR5     | 1 | 1.034682081 |
| ENSG00000134440 | NARS      | 1 | 0.613407821 |
| ENSG00000134452 | FBXO18    | 1 | 0.340699816 |
| ENSG00000134460 | IL2RA     | 1 | 0.340699816 |
| ENSG00000134463 | ECHDC3    | 1 | 0.340699816 |
| ENSG00000134470 | IL15RA    | 1 | 0.340699816 |
| ENSG00000134490 | TMEM241   | 1 | 1.033519553 |
| ENSG00000134574 | DDB2      | 1 | 0.340699816 |
| ENSG00000134602 | MST4      | 1 | 1.033519553 |
| ENSG00000134627 | PIWIL4    | 1 | 0.613407821 |
| ENSG00000134644 | PUM1      | 1 | 1.033519553 |
| ENSG00000134697 | GNL2      | 1 | 0.613407821 |
| ENSG00000134709 | HOOK1     | 1 | 1.033519553 |
| ENSG00000134760 | DSG1      | 1 | 1.033898305 |
| ENSG00000134779 | TPGS2     | 1 | 1.033898305 |
| ENSG00000134901 | KDELC1    | 1 | 0.340699816 |
| ENSG00000134905 | CARS2     | 1 | 1.033519553 |
| ENSG00000134917 | ADAMTS8   | 1 | 1.033519553 |
| ENSG00000134954 | ETS1      | 1 | 0.613407821 |
| ENSG00000134986 | NREP      | 1 | 0.340699816 |
| ENSG00000134987 | WDR36     | 1 | 1.034285714 |
| ENSG00000135040 | NAA35     | 1 | 0.340699816 |
| ENSG00000135069 | PSAT1     | 1 | 0.340699816 |
| ENSG00000135094 | SDS       | 1 | 1.033519553 |

|                 |          |   |             |
|-----------------|----------|---|-------------|
| ENSG00000135127 | CCDC64   | 1 | 1.033519553 |
| ENSG00000135185 | TMEM243  | 1 | 0.340699816 |
| ENSG00000135213 | POM121C  | 1 | 0.340699816 |
| ENSG00000135222 | CSN2     | 1 | 1.033519553 |
| ENSG00000135249 | RINT1    | 1 | 1.033519553 |
| ENSG00000135250 | SRPK2    | 1 | 0.340699816 |
| ENSG00000135297 | MTO1     | 1 | 1.033519553 |
| ENSG00000135362 | PRR5L    | 1 | 1.033519553 |
| ENSG00000135372 | NAT10    | 1 | 1.033898305 |
| ENSG00000135392 | DNAJC14  | 1 | 0.340699816 |
| ENSG00000135423 | GLS2     | 1 | 0.340699816 |
| ENSG00000135454 | B4GALNT1 | 1 | 1.033519553 |
| ENSG00000135521 | LTV1     | 1 | 1.033519553 |
| ENSG00000135525 | MAP7     | 1 | 1.033519553 |
| ENSG00000135537 | LACE1    | 1 | 1.033519553 |
| ENSG00000135596 | MICAL1   | 1 | 1.033519553 |
| ENSG00000135605 | TEC      | 1 | 1.033519553 |
| ENSG00000135677 | GNS      | 1 | 1.033519553 |
| ENSG00000135678 | CPM      | 1 | 0.613407821 |
| ENSG00000135686 | KLHL36   | 1 | 0.340699816 |
| ENSG00000135709 | KIAA0513 | 1 | 1.033519553 |
| ENSG00000135720 | DYNC1LI2 | 1 | 0.340699816 |
| ENSG00000135740 | SLC9A5   | 1 | 1.033519553 |
| ENSG00000135749 | PCNXL2   | 1 | 0.795555556 |
| ENSG00000135750 | KCNK1    | 1 | 1.033519553 |
| ENSG00000135776 | ABCB10   | 1 | 0.340699816 |
| ENSG00000135801 | TAF5L    | 1 | 1.033519553 |
| ENSG00000135828 | RNASEL   | 1 | 1.033519553 |
| ENSG00000135835 | KIAA1614 | 1 | 0.730427764 |
| ENSG00000135842 | FAM129A  | 1 | 1.033898305 |
| ENSG00000135862 | LAMC1    | 1 | 0.795555556 |
| ENSG00000135870 | RC3H1    | 1 | 1.034285714 |
| ENSG00000135898 | GPR55    | 1 | 0.340699816 |
| ENSG00000135916 | ITM2C    | 1 | 0.340699816 |
| ENSG00000135917 | SLC19A3  | 1 | 1.034285714 |
| ENSG00000135925 | WNT10A   | 1 | 1.033519553 |
| ENSG00000135929 | CYP27A1  | 1 | 0.340699816 |
| ENSG00000135960 | EDAR     | 1 | 1.033519553 |
| ENSG00000135973 | GPR45    | 1 | 0.340699816 |
| ENSG00000136010 | ALDH1L2  | 1 | 0.340699816 |
| ENSG00000136014 | USP44    | 1 | 0.340699816 |
| ENSG00000136059 | VILL     | 1 | 0.613407821 |
| ENSG00000136068 | FLNB     | 1 | 0.795555556 |
| ENSG00000136099 | PCDH8    | 1 | 1.033519553 |
| ENSG00000136100 | VPS36    | 1 | 0.340699816 |
| ENSG00000136104 | RNASEH2B | 1 | 0.613407821 |
| ENSG00000136108 | CKAP2    | 1 | 1.033519553 |

|                 |          |   |             |
|-----------------|----------|---|-------------|
| ENSG00000136152 | COG3     | 1 | 0.340699816 |
| ENSG00000136156 | ITM2B    | 1 | 1.033519553 |
| ENSG00000136193 | SCRN1    | 1 | 0.340699816 |
| ENSG00000136213 | CHST12   | 1 | 0.340699816 |
| ENSG00000136235 | GPNMB    | 1 | 1.033898305 |
| ENSG00000136267 | DGKB     | 1 | 0.340699816 |
| ENSG00000136275 | C7orf69  | 1 | 0.340699816 |
| ENSG00000136378 | ADAMTS7  | 1 | 0.340699816 |
| ENSG00000136381 | IREB2    | 1 | 0.340699816 |
| ENSG00000136383 | ALPK3    | 1 | 1.033519553 |
| ENSG00000136546 | SCN7A    | 1 | 1.033898305 |
| ENSG00000136574 | GATA4    | 1 | 0.340699816 |
| ENSG00000136603 | SKIL     | 1 | 0.340699816 |
| ENSG00000136694 | IL36A    | 1 | 0.340699816 |
| ENSG00000136695 | IL36RN   | 1 | 0.340699816 |
| ENSG00000136697 | IL1F10   | 1 | 1.033519553 |
| ENSG00000136709 | WDR33    | 1 | 1.033898305 |
| ENSG00000136738 | STAM     | 1 | 0.340699816 |
| ENSG00000136758 | YME1L1   | 1 | 0.340699816 |
| ENSG00000136811 | ODF2     | 1 | 1.034285714 |
| ENSG00000136813 | KIAA0368 | 1 | 1.033898305 |
| ENSG00000136816 | TOR1B    | 1 | 0.340699816 |
| ENSG00000136819 | C9orf78  | 1 | 0.340699816 |
| ENSG00000136830 | FAM129B  | 1 | 1.033519553 |
| ENSG00000136839 | OR13C9   | 1 | 0.340699816 |
| ENSG00000136859 | ANGPTL2  | 1 | 1.033519553 |
| ENSG00000136870 | ZNF189   | 1 | 0.340699816 |
| ENSG00000136875 | PRPF4    | 1 | 0.340699816 |
| ENSG00000136877 | FPGS     | 1 | 0.340699816 |
| ENSG00000136878 | USP20    | 1 | 1.033898305 |
| ENSG00000136895 | GARNL3   | 1 | 1.033519553 |
| ENSG00000136897 | MRPL50   | 1 | 1.033519553 |
| ENSG00000136925 | TSTD2    | 1 | 0.340699816 |
| ENSG00000136928 | GABBR2   | 1 | 1.033519553 |
| ENSG00000136929 | HEMGN    | 1 | 0.340699816 |
| ENSG00000136932 | C9orf156 | 1 | 0.340699816 |
| ENSG00000136933 | RABEPK   | 1 | 1.033898305 |
| ENSG00000136939 | OR1L4    | 1 | 0.340699816 |
| ENSG00000136982 | DSCC1    | 1 | 0.613407821 |
| ENSG00000137073 | UBAP2    | 1 | 1.033898305 |
| ENSG00000137078 | SIT1     | 1 | 1.033519553 |
| ENSG00000137106 | GRHPR    | 1 | 0.613407821 |
| ENSG00000137171 | KLC4     | 1 | 0.340699816 |
| ENSG00000137177 | KIF13A   | 1 | 0.837099317 |
| ENSG00000137207 | YIPF3    | 1 | 0.340699816 |
| ENSG00000137225 | CAPN11   | 1 | 0.730427764 |
| ENSG00000137310 | TCF19    | 1 | 1.033898305 |

|                 |          |   |             |
|-----------------|----------|---|-------------|
| ENSG00000137411 | VARS2    | 1 | 1.033519553 |
| ENSG00000137434 | C6orf52  | 1 | 1.033519553 |
| ENSG00000137441 | FGFBP2   | 1 | 0.340699816 |
| ENSG00000137460 | FHDC1    | 1 | 1.033519553 |
| ENSG00000137491 | SLCO2B1  | 1 | 1.033898305 |
| ENSG00000137494 | ANKRD42  | 1 | 0.340699816 |
| ENSG00000137496 | IL18BP   | 1 | 0.340699816 |
| ENSG00000137501 | SYTL2    | 1 | 1.035502959 |
| ENSG00000137573 | SULF1    | 1 | 1.034285714 |
| ENSG00000137574 | TGS1     | 1 | 1.033898305 |
| ENSG00000137628 | DDX60    | 1 | 0.613407821 |
| ENSG00000137674 | MMP20    | 1 | 0.613407821 |
| ENSG00000137691 | C11orf70 | 1 | 0.340699816 |
| ENSG00000137707 | BTG4     | 1 | 0.340699816 |
| ENSG00000137709 | POU2F3   | 1 | 0.340699816 |
| ENSG00000137713 | PPP2R1B  | 1 | 0.730427764 |
| ENSG00000137720 | C11orf1  | 1 | 0.340699816 |
| ENSG00000137726 | FXYP6    | 1 | 0.340699816 |
| ENSG00000137747 | TMPRSS13 | 1 | 0.340699816 |
| ENSG00000137757 | CASP5    | 1 | 0.340699816 |
| ENSG00000137809 | ITGA11   | 1 | 1.033519553 |
| ENSG00000137812 | CASC5    | 1 | 1.033519553 |
| ENSG00000137831 | UACA     | 1 | 0.613407821 |
| ENSG00000137843 | PAK6     | 1 | 0.340699816 |
| ENSG00000137860 | SLC28A2  | 1 | 1.033898305 |
| ENSG00000137871 | ZNF280D  | 1 | 1.033519553 |
| ENSG00000137877 | SPTBN5   | 1 | 0.795555556 |
| ENSG00000137942 | FNBP1L   | 1 | 0.340699816 |
| ENSG00000137962 | ARHGAP29 | 1 | 1.033519553 |
| ENSG00000137965 | IFI44    | 1 | 0.613407821 |
| ENSG00000137996 | RTCA     | 1 | 0.613407821 |
| ENSG00000138039 | LHCGR    | 1 | 1.033519553 |
| ENSG00000138050 | THUMPD2  | 1 | 0.340699816 |
| ENSG00000138074 | SLC5A6   | 1 | 0.340699816 |
| ENSG00000138095 | LRPPRC   | 1 | 1.033519553 |
| ENSG00000138100 | TRIM54   | 1 | 0.340699816 |
| ENSG00000138152 | BTBD16   | 1 | 0.340699816 |
| ENSG00000138162 | TACC2    | 1 | 0.837099317 |
| ENSG00000138180 | CEP55    | 1 | 1.033898305 |
| ENSG00000138185 | ENTPD1   | 1 | 1.033519553 |
| ENSG00000138311 | ZNF365   | 1 | 0.340699816 |
| ENSG00000138346 | DNA2     | 1 | 1.034285714 |
| ENSG00000138356 | AOX1     | 1 | 0.340699816 |
| ENSG00000138363 | ATIC     | 1 | 0.340699816 |
| ENSG00000138379 | MSTN     | 1 | 1.033519553 |
| ENSG00000138381 | ASNSD1   | 1 | 0.340699816 |
| ENSG00000138382 | METTL5   | 1 | 0.340699816 |

|                 |          |   |             |
|-----------------|----------|---|-------------|
| ENSG00000138399 | FASTKD1  | 1 | 1.033519553 |
| ENSG00000138434 | SSFA2    | 1 | 1.033898305 |
| ENSG00000138617 | PARP16   | 1 | 0.340699816 |
| ENSG00000138653 | NDST4    | 1 | 1.033519553 |
| ENSG00000138670 | RASGEF1B | 1 | 0.340699816 |
| ENSG00000138688 | KIAA1109 | 1 | 0.613407821 |
| ENSG00000138722 | MMRN1    | 1 | 1.033898305 |
| ENSG00000138750 | NUP54    | 1 | 0.340699816 |
| ENSG00000138755 | CXCL9    | 1 | 0.340699816 |
| ENSG00000138756 | BMP2K    | 1 | 0.613407821 |
| ENSG00000138760 | SCARB2   | 1 | 1.033519553 |
| ENSG00000138764 | CCNG2    | 1 | 0.340699816 |
| ENSG00000138778 | CENPE    | 1 | 1.033519553 |
| ENSG00000138795 | LEF1     | 1 | 0.340699816 |
| ENSG00000138796 | HADH     | 1 | 0.613407821 |
| ENSG00000138798 | EGF      | 1 | 1.033519553 |
| ENSG00000138813 | C4orf17  | 1 | 0.340699816 |
| ENSG00000138834 | MAPK8IP3 | 1 | 0.340699816 |
| ENSG00000139132 | FGD4     | 1 | 1.033519553 |
| ENSG00000139173 | TMEM117  | 1 | 1.033898305 |
| ENSG00000139178 | C1RL     | 1 | 0.340699816 |
| ENSG00000139182 | CLSTN3   | 1 | 0.340699816 |
| ENSG00000139219 | COL2A1   | 1 | 1.033519553 |
| ENSG00000139263 | LRIG3    | 1 | 0.340699816 |
| ENSG00000139287 | TPH2     | 1 | 1.033519553 |
| ENSG00000139292 | LGR5     | 1 | 0.795555556 |
| ENSG00000139304 | PTPRQ    | 1 | 1.033519553 |
| ENSG00000139329 | LUM      | 1 | 0.340699816 |
| ENSG00000139351 | SYCP3    | 1 | 0.340699816 |
| ENSG00000139364 | TMEM132B | 1 | 1.033519553 |
| ENSG00000139370 | SLC15A4  | 1 | 1.033898305 |
| ENSG00000139372 | TDG      | 1 | 1.033519553 |
| ENSG00000139428 | MMAB     | 1 | 0.340699816 |
| ENSG00000139437 | TCHP     | 1 | 0.340699816 |
| ENSG00000139445 | FOXN4    | 1 | 1.033519553 |
| ENSG00000139496 | NUPL1    | 1 | 0.613407821 |
| ENSG00000139508 | SLC46A3  | 1 | 0.340699816 |
| ENSG00000139540 | SLC39A5  | 1 | 1.034285714 |
| ENSG00000139547 | RDH16    | 1 | 0.340699816 |
| ENSG00000139567 | ACVRL1   | 1 | 0.340699816 |
| ENSG00000139572 | GPR84    | 1 | 1.033519553 |
| ENSG00000139597 | N4BP2L1  | 1 | 0.340699816 |
| ENSG00000139631 | CSAD     | 1 | 1.034285714 |
| ENSG00000139637 | C12orf10 | 1 | 1.033898305 |
| ENSG00000139644 | TMBIM6   | 1 | 1.033519553 |
| ENSG00000139645 | ANKRD52  | 1 | 0.340699816 |
| ENSG00000139648 | KRT71    | 1 | 1.033898305 |

|                 |          |   |             |
|-----------------|----------|---|-------------|
| ENSG00000139679 | LPAR6    | 1 | 1.033519553 |
| ENSG00000139687 | RB1      | 1 | 1.033519553 |
| ENSG00000139697 | SBNO1    | 1 | 1.033519553 |
| ENSG00000139718 | SETD1B   | 1 | 1.034682081 |
| ENSG00000139800 | ZIC5     | 1 | 0.340699816 |
| ENSG00000139826 | ABHD13   | 1 | 0.340699816 |
| ENSG00000139832 | RAB20    | 1 | 1.033519553 |
| ENSG00000139908 | TSSK4    | 1 | 0.340699816 |
| ENSG00000139910 | NOVA1    | 1 | 1.033519553 |
| ENSG00000139915 | MDGA2    | 1 | 1.033519553 |
| ENSG00000139926 | FRMD6    | 1 | 1.033519553 |
| ENSG00000139946 | PELI2    | 1 | 0.340699816 |
| ENSG00000139971 | C14orf37 | 1 | 0.613407821 |
| ENSG00000139974 | SLC38A6  | 1 | 0.340699816 |
| ENSG00000139990 | DCAF5    | 1 | 1.033519553 |
| ENSG00000140092 | FBLN5    | 1 | 0.340699816 |
| ENSG00000140104 | C14orf79 | 1 | 1.033519553 |
| ENSG00000140107 | SLC25A47 | 1 | 1.033898305 |
| ENSG00000140157 | NIPA2    | 1 | 0.613407821 |
| ENSG00000140280 | LYSMD2   | 1 | 1.033519553 |
| ENSG00000140299 | BNIP2    | 1 | 1.033519553 |
| ENSG00000140367 | UBE2Q2   | 1 | 1.033519553 |
| ENSG00000140374 | ETFA     | 1 | 0.340699816 |
| ENSG00000140382 | HMG20A   | 1 | 0.340699816 |
| ENSG00000140398 | NEIL1    | 1 | 1.033898305 |
| ENSG00000140400 | MAN2C1   | 1 | 0.730427764 |
| ENSG00000140463 | BBS4     | 1 | 0.613407821 |
| ENSG00000140464 | PML      | 1 | 1.034285714 |
| ENSG00000140465 | CYP1A1   | 1 | 1.033898305 |
| ENSG00000140470 | ADAMTS17 | 1 | 1.033898305 |
| ENSG00000140522 | RLBP1    | 1 | 0.340699816 |
| ENSG00000140525 | FANCI    | 1 | 1.033519553 |
| ENSG00000140526 | ABHD2    | 1 | 0.340699816 |
| ENSG00000140543 | DET1     | 1 | 0.340699816 |
| ENSG00000140553 | UNC45A   | 1 | 1.033898305 |
| ENSG00000140575 | IQGAP1   | 1 | 0.340699816 |
| ENSG00000140577 | CRTC3    | 1 | 1.033519553 |
| ENSG00000140650 | PMM2     | 1 | 0.340699816 |
| ENSG00000140688 | C16orf58 | 1 | 0.340699816 |
| ENSG00000140691 | ARMC5    | 1 | 0.613407821 |
| ENSG00000140694 | PARN     | 1 | 1.033519553 |
| ENSG00000140740 | UQCRC2   | 1 | 0.340699816 |
| ENSG00000140749 | IGSF6    | 1 | 1.033519553 |
| ENSG00000140750 | ARHGAP17 | 1 | 1.033898305 |
| ENSG00000140835 | CHST4    | 1 | 1.033898305 |
| ENSG00000140932 | CMTM2    | 1 | 1.033519553 |
| ENSG00000140937 | CDH11    | 1 | 1.033519553 |

|                 |           |   |             |
|-----------------|-----------|---|-------------|
| ENSG00000140950 | TLDC1     | 1 | 1.033898305 |
| ENSG00000140955 | ADAD2     | 1 | 1.033898305 |
| ENSG00000140983 | RHOT2     | 1 | 0.340699816 |
| ENSG00000140987 | ZSCAN32   | 1 | 1.033519553 |
| ENSG00000141013 | GAS8      | 1 | 1.033898305 |
| ENSG00000141027 | NCOR1     | 1 | 1.034682081 |
| ENSG00000141068 | KSR1      | 1 | 1.033898305 |
| ENSG00000141086 | CTRL      | 1 | 0.340699816 |
| ENSG00000141200 | KIF2B     | 1 | 1.033519553 |
| ENSG00000141293 | SKAP1     | 1 | 0.340699816 |
| ENSG00000141294 | LRRC46    | 1 | 0.340699816 |
| ENSG00000141295 | SCRN2     | 1 | 1.033519553 |
| ENSG00000141316 | SPACA3    | 1 | 1.034285714 |
| ENSG00000141337 | ARSG      | 1 | 1.033519553 |
| ENSG00000141371 | C17orf64  | 1 | 1.033519553 |
| ENSG00000141378 | PTRH2     | 1 | 0.340699816 |
| ENSG00000141380 | SS18      | 1 | 1.033519553 |
| ENSG00000141384 | TAF4B     | 1 | 0.340699816 |
| ENSG00000141424 | SLC39A6   | 1 | 0.340699816 |
| ENSG00000141431 | ASXL3     | 1 | 1.034285714 |
| ENSG00000141434 | MEP1B     | 1 | 0.340699816 |
| ENSG00000141447 | OSBPL1A   | 1 | 1.034285714 |
| ENSG00000141449 | GREB1L    | 1 | 1.033519553 |
| ENSG00000141469 | SLC14A1   | 1 | 0.340699816 |
| ENSG00000141503 | MINK1     | 1 | 1.033519553 |
| ENSG00000141506 | PIK3R5    | 1 | 0.340699816 |
| ENSG00000141562 | NARF      | 1 | 1.033898305 |
| ENSG00000141568 | FOXK2     | 1 | 0.613407821 |
| ENSG00000141642 | ELAC1     | 1 | 1.033519553 |
| ENSG00000141644 | MBD1      | 1 | 0.340699816 |
| ENSG00000141750 | STAC2     | 1 | 1.033519553 |
| ENSG00000141867 | BRD4      | 1 | 1.033519553 |
| ENSG00000142166 | IFNAR1    | 1 | 1.033519553 |
| ENSG00000142178 | SIK1      | 1 | 0.340699816 |
| ENSG00000142186 | SCYL1     | 1 | 0.613407821 |
| ENSG00000142197 | DOPEY2    | 1 | 1.034682081 |
| ENSG00000142233 | NTN5      | 1 | 1.033519553 |
| ENSG00000142405 | NLRP12    | 1 | 1.033519553 |
| ENSG00000142484 | TM4SF5    | 1 | 0.340699816 |
| ENSG00000142512 | SIGLEC10  | 1 | 1.033519553 |
| ENSG00000142552 | RCN3      | 1 | 1.034285714 |
| ENSG00000142556 | ZNF614    | 1 | 1.033519553 |
| ENSG00000142609 | C1orf222  | 1 | 1.033519553 |
| ENSG00000142615 | CELA2A    | 1 | 1.033519553 |
| ENSG00000142623 | PADI1     | 1 | 1.033519553 |
| ENSG00000142661 | MYOM3     | 1 | 0.730427764 |
| ENSG00000142687 | KIAA0319L | 1 | 0.340699816 |

|                 |           |   |             |
|-----------------|-----------|---|-------------|
| ENSG00000142698 | C1orf94   | 1 | 1.033519553 |
| ENSG00000142748 | FCN3      | 1 | 1.033519553 |
| ENSG00000142867 | BCL10     | 1 | 1.033519553 |
| ENSG00000142961 | MOB3C     | 1 | 0.340699816 |
| ENSG00000142973 | CYP4B1    | 1 | 1.033519553 |
| ENSG00000143001 | TMEM61    | 1 | 0.340699816 |
| ENSG00000143028 | SYPL2     | 1 | 1.033519553 |
| ENSG00000143036 | SLC44A3   | 1 | 0.340699816 |
| ENSG00000143079 | CTTNBP2NL | 1 | 1.033898305 |
| ENSG00000143147 | GPR161    | 1 | 0.340699816 |
| ENSG00000143278 | F13B      | 1 | 0.613407821 |
| ENSG00000143297 | FCRL5     | 1 | 0.340699816 |
| ENSG00000143318 | CASQ1     | 1 | 1.033519553 |
| ENSG00000143322 | ABL2      | 1 | 0.613407821 |
| ENSG00000143324 | XPR1      | 1 | 0.340699816 |
| ENSG00000143344 | RGL1      | 1 | 0.340699816 |
| ENSG00000143353 | LYPLAL1   | 1 | 0.340699816 |
| ENSG00000143369 | ECM1      | 1 | 0.340699816 |
| ENSG00000143374 | TARS2     | 1 | 0.613407821 |
| ENSG00000143382 | ADAMTSL4  | 1 | 1.033898305 |
| ENSG00000143409 | FAM63A    | 1 | 1.033898305 |
| ENSG00000143437 | ARNT      | 1 | 1.033519553 |
| ENSG00000143442 | POGZ      | 1 | 0.340699816 |
| ENSG00000143473 | KCNH1     | 1 | 0.340699816 |
| ENSG00000143502 | SUSD4     | 1 | 0.340699816 |
| ENSG00000143515 | ATP8B2    | 1 | 0.613407821 |
| ENSG00000143537 | ADAM15    | 1 | 0.340699816 |
| ENSG00000143543 | JTB       | 1 | 0.340699816 |
| ENSG00000143552 | NUP210L   | 1 | 0.613407821 |
| ENSG00000143554 | SLC27A3   | 1 | 1.033898305 |
| ENSG00000143556 | S100A7    | 1 | 0.340699816 |
| ENSG00000143569 | UBAP2L    | 1 | 1.033519553 |
| ENSG00000143570 | SLC39A1   | 1 | 0.340699816 |
| ENSG00000143595 | AQP10     | 1 | 0.340699816 |
| ENSG00000143612 | C1orf43   | 1 | 1.033519553 |
| ENSG00000143627 | PKLR      | 1 | 0.730427764 |
| ENSG00000143674 | MLK4      | 1 | 1.033898305 |
| ENSG00000143753 | DEGS1     | 1 | 0.340699816 |
| ENSG00000143774 | GUK1      | 1 | 1.033519553 |
| ENSG00000143797 | MBOAT2    | 1 | 0.340699816 |
| ENSG00000143799 | PARP1     | 1 | 0.340699816 |
| ENSG00000143842 | SOX13     | 1 | 0.340699816 |
| ENSG00000143847 | PPFIA4    | 1 | 0.340699816 |
| ENSG00000143850 | PLEKHA6   | 1 | 1.034285714 |
| ENSG00000143882 | ATP6V1C2  | 1 | 0.340699816 |
| ENSG00000143889 | HNRNPLL   | 1 | 1.033519553 |
| ENSG00000143947 | RPS27A    | 1 | 0.340699816 |

|                 |          |   |             |
|-----------------|----------|---|-------------|
| ENSG00000143952 | VPS54    | 1 | 1.033519553 |
| ENSG00000143954 | REG3G    | 1 | 0.340699816 |
| ENSG00000143971 | ETAA1    | 1 | 1.033898305 |
| ENSG00000143995 | MEIS1    | 1 | 1.033519553 |
| ENSG00000144040 | SFXN5    | 1 | 1.033519553 |
| ENSG00000144045 | DQX1     | 1 | 0.340699816 |
| ENSG00000144063 | MALL     | 1 | 0.340699816 |
| ENSG00000144120 | TMEM177  | 1 | 1.033519553 |
| ENSG00000144130 | NT5DC4   | 1 | 1.033519553 |
| ENSG00000144152 | FBLN7    | 1 | 1.033519553 |
| ENSG00000144218 | AFF3     | 1 | 0.340699816 |
| ENSG00000144230 | GPR17    | 1 | 1.033898305 |
| ENSG00000144283 | PKP4     | 1 | 0.613407821 |
| ENSG00000144285 | SCN1A    | 1 | 1.034285714 |
| ENSG00000144320 | KIAA1715 | 1 | 0.340699816 |
| ENSG00000144357 | UBR3     | 1 | 1.033519553 |
| ENSG00000144362 | PHOSPHO2 | 1 | 1.033519553 |
| ENSG00000144395 | CCDC150  | 1 | 0.613407821 |
| ENSG00000144401 | METTL21A | 1 | 0.340699816 |
| ENSG00000144406 | UNC80    | 1 | 1.033898305 |
| ENSG00000144426 | NBEAL1   | 1 | 1.034285714 |
| ENSG00000144445 | KANSL1L  | 1 | 0.340699816 |
| ENSG00000144451 | SPAG16   | 1 | 1.033898305 |
| ENSG00000144468 | RHBDD1   | 1 | 1.033898305 |
| ENSG00000144476 | ACKR3    | 1 | 0.340699816 |
| ENSG00000144481 | TRPM8    | 1 | 0.613407821 |
| ENSG00000144554 | FANCD2   | 1 | 0.340699816 |
| ENSG00000144589 | STK11IP  | 1 | 0.613407821 |
| ENSG00000144591 | GMPPA    | 1 | 0.340699816 |
| ENSG00000144597 | EAF1     | 1 | 1.033898305 |
| ENSG00000144659 | SLC25A38 | 1 | 1.033519553 |
| ENSG00000144681 | STAC     | 1 | 1.033519553 |
| ENSG00000144713 | RPL32    | 1 | 1.033519553 |
| ENSG00000144730 | IL17RD   | 1 | 0.340699816 |
| ENSG00000144736 | SHQ1     | 1 | 0.340699816 |
| ENSG00000144771 | LRTM1    | 1 | 0.340699816 |
| ENSG00000144791 | LIMD1    | 1 | 0.613407821 |
| ENSG00000144820 | GPR128   | 1 | 0.340699816 |
| ENSG00000144827 | ABHD10   | 1 | 0.340699816 |
| ENSG00000144847 | IGSF11   | 1 | 1.033519553 |
| ENSG00000144852 | NR1I2    | 1 | 0.340699816 |
| ENSG00000144857 | BOC      | 1 | 0.340699816 |
| ENSG00000144893 | MED12L   | 1 | 1.033519553 |
| ENSG00000144908 | ALDH1L1  | 1 | 0.340699816 |
| ENSG00000144909 | OSBPL11  | 1 | 0.340699816 |
| ENSG00000145012 | LPP      | 1 | 0.613407821 |
| ENSG00000145014 | TMEM44   | 1 | 0.613407821 |

|                 |           |   |             |
|-----------------|-----------|---|-------------|
| ENSG00000145020 | AMT       | 1 | 0.613407821 |
| ENSG00000145029 | NICN1     | 1 | 0.340699816 |
| ENSG00000145041 | VPRBP     | 1 | 0.340699816 |
| ENSG00000145050 | MANF      | 1 | 0.340699816 |
| ENSG00000145087 | STXBP5L   | 1 | 1.033519553 |
| ENSG00000145113 | MUC4      | 1 | 1.035928144 |
| ENSG00000145147 | SLIT2     | 1 | 1.033898305 |
| ENSG00000145191 | EIF2B5    | 1 | 1.033519553 |
| ENSG00000145194 | ECE2      | 1 | 1.033519553 |
| ENSG00000145198 | VWA5B2    | 1 | 0.340699816 |
| ENSG00000145214 | DGKQ      | 1 | 1.033519553 |
| ENSG00000145217 | SLC26A1   | 1 | 0.340699816 |
| ENSG00000145241 | CENPC     | 1 | 0.340699816 |
| ENSG00000145244 | CORIN     | 1 | 0.613407821 |
| ENSG00000145246 | ATP10D    | 1 | 1.033519553 |
| ENSG00000145284 | SCD5      | 1 | 0.340699816 |
| ENSG00000145331 | TRMT10A   | 1 | 0.340699816 |
| ENSG00000145358 | DDIT4L    | 1 | 1.033519553 |
| ENSG00000145362 | ANK2      | 1 | 0.837099317 |
| ENSG00000145365 | TIFA      | 1 | 0.340699816 |
| ENSG00000145414 | NAF1      | 1 | 1.033519553 |
| ENSG00000145439 | CBR4      | 1 | 0.340699816 |
| ENSG00000145451 | GLRA3     | 1 | 1.033519553 |
| ENSG00000145506 | NKD2      | 1 | 0.340699816 |
| ENSG00000145623 | OSMR      | 1 | 1.033519553 |
| ENSG00000145626 | UGT3A1    | 1 | 0.340699816 |
| ENSG00000145700 | ANKRD31   | 1 | 0.613407821 |
| ENSG00000145819 | ARHGAP26  | 1 | 0.340699816 |
| ENSG00000145850 | TIMD4     | 1 | 1.033519553 |
| ENSG00000145879 | SPINK7    | 1 | 1.033519553 |
| ENSG00000145888 | GLRA1     | 1 | 0.340699816 |
| ENSG00000145934 | TENM2     | 1 | 0.865946919 |
| ENSG00000145936 | KCNMB1    | 1 | 1.033519553 |
| ENSG00000145965 | C6ORF50   | 1 | 0.340699816 |
| ENSG00000145996 | CDKAL1    | 1 | 0.340699816 |
| ENSG00000146039 | SLC17A4   | 1 | 1.033519553 |
| ENSG00000146047 | HIST1H2BA | 1 | 1.033519553 |
| ENSG00000146067 | FAM193B   | 1 | 0.340699816 |
| ENSG00000146143 | PRIM2     | 1 | 1.033898305 |
| ENSG00000146147 | MLIP      | 1 | 0.340699816 |
| ENSG00000146197 | SCUBE3    | 1 | 0.730427764 |
| ENSG00000146216 | TTBK1     | 1 | 1.033519553 |
| ENSG00000146267 | FAXC      | 1 | 0.340699816 |
| ENSG00000146276 | GABRR1    | 1 | 0.340699816 |
| ENSG00000146278 | PNRC1     | 1 | 0.340699816 |
| ENSG00000146285 | SCML4     | 1 | 1.033519553 |
| ENSG00000146350 | TBC1D32   | 1 | 1.034682081 |

|                 |          |   |             |
|-----------------|----------|---|-------------|
| ENSG00000146352 | CLVS2    | 1 | 0.340699816 |
| ENSG00000146376 | ARHGAP18 | 1 | 0.340699816 |
| ENSG00000146463 | ZMYM4    | 1 | 0.340699816 |
| ENSG00000146477 | SLC22A3  | 1 | 0.340699816 |
| ENSG00000146618 | FERD3L   | 1 | 0.340699816 |
| ENSG00000146678 | IGFBP1   | 1 | 0.340699816 |
| ENSG00000146731 | CCT6A    | 1 | 0.340699816 |
| ENSG00000146809 | ASB15    | 1 | 0.340699816 |
| ENSG00000146833 | TRIM4    | 1 | 1.033519553 |
| ENSG00000146918 | NCAPG2   | 1 | 1.033519553 |
| ENSG00000146926 | ASB10    | 1 | 1.033519553 |
| ENSG00000146966 | DENND2A  | 1 | 0.340699816 |
| ENSG00000147010 | SH3KBP1  | 1 | 1.033519553 |
| ENSG00000147036 | LANCL3   | 1 | 0.340699816 |
| ENSG00000147050 | KDM6A    | 1 | 0.613407821 |
| ENSG00000147124 | ZNF41    | 1 | 0.340699816 |
| ENSG00000147145 | LPAR4    | 1 | 0.340699816 |
| ENSG00000147160 | AWAT2    | 1 | 1.033519553 |
| ENSG00000147202 | DIAPH2   | 1 | 0.340699816 |
| ENSG00000147231 | CXorf57  | 1 | 0.340699816 |
| ENSG00000147234 | FRMPD3   | 1 | 0.340699816 |
| ENSG00000147324 | MFHAS1   | 1 | 1.033519553 |
| ENSG00000147383 | NSDHL    | 1 | 0.340699816 |
| ENSG00000147416 | ATP6V1B2 | 1 | 1.033519553 |
| ENSG00000147419 | CCDC25   | 1 | 0.340699816 |
| ENSG00000147434 | CHRNA6   | 1 | 0.340699816 |
| ENSG00000147439 | BIN3     | 1 | 0.340699816 |
| ENSG00000147481 | SNTG1    | 1 | 0.340699816 |
| ENSG00000147485 | PXDNL    | 1 | 1.034285714 |
| ENSG00000147488 | ST18     | 1 | 0.340699816 |
| ENSG00000147592 | LACTB2   | 1 | 1.033519553 |
| ENSG00000147596 | PRDM14   | 1 | 1.033519553 |
| ENSG00000147647 | DPYS     | 1 | 0.340699816 |
| ENSG00000147697 | GSDMC    | 1 | 1.033898305 |
| ENSG00000147799 | ARHGAP39 | 1 | 1.033519553 |
| ENSG00000147804 | SLC39A4  | 1 | 0.340699816 |
| ENSG00000147813 | NAPRT1   | 1 | 1.033519553 |
| ENSG00000147862 | NFIB     | 1 | 0.340699816 |
| ENSG00000147873 | IFNA5    | 1 | 1.033519553 |
| ENSG00000147894 | C9orf72  | 1 | 0.340699816 |
| ENSG00000147896 | IFNK     | 1 | 1.033519553 |
| ENSG00000147905 | ZCCHC7   | 1 | 0.613407821 |
| ENSG00000148053 | NTRK2    | 1 | 0.613407821 |
| ENSG00000148090 | AUH      | 1 | 1.033519553 |
| ENSG00000148136 | OR13C4   | 1 | 1.033519553 |
| ENSG00000148154 | UGCG     | 1 | 0.340699816 |
| ENSG00000148156 | ACTL7B   | 1 | 0.340699816 |

|                 |          |   |             |
|-----------------|----------|---|-------------|
| ENSG00000148175 | STOM     | 1 | 1.033519553 |
| ENSG00000148204 | CRB2     | 1 | 1.033898305 |
| ENSG00000148215 | OR5C1    | 1 | 0.340699816 |
| ENSG00000148290 | SURF1    | 1 | 1.033519553 |
| ENSG00000148297 | MED22    | 1 | 0.340699816 |
| ENSG00000148300 | REXO4    | 1 | 1.033519553 |
| ENSG00000148337 | CIZ1     | 1 | 1.034285714 |
| ENSG00000148356 | LRSAM1   | 1 | 0.340699816 |
| ENSG00000148386 | LCN9     | 1 | 0.613407821 |
| ENSG00000148396 | SEC16A   | 1 | 1.033898305 |
| ENSG00000148408 | CACNA1B  | 1 | 1.033898305 |
| ENSG00000148411 | NACC2    | 1 | 1.033519553 |
| ENSG00000148429 | USP6NL   | 1 | 0.340699816 |
| ENSG00000148444 | COMMD3   | 1 | 0.340699816 |
| ENSG00000148450 | MSRB2    | 1 | 1.033519553 |
| ENSG00000148459 | PDSS1    | 1 | 0.340699816 |
| ENSG00000148541 | FAM13C   | 1 | 0.613407821 |
| ENSG00000148604 | RGR      | 1 | 1.033519553 |
| ENSG00000148634 | HERC4    | 1 | 1.033898305 |
| ENSG00000148677 | ANKRD1   | 1 | 0.613407821 |
| ENSG00000148688 | RPP30    | 1 | 0.340699816 |
| ENSG00000148700 | ADD3     | 1 | 0.613407821 |
| ENSG00000148734 | NPFFR1   | 1 | 1.033519553 |
| ENSG00000148795 | CYP17A1  | 1 | 0.613407821 |
| ENSG00000148803 | FUOM     | 1 | 1.033519553 |
| ENSG00000148965 | SAA4     | 1 | 1.033519553 |
| ENSG00000149016 | TUT1     | 1 | 1.034682081 |
| ENSG00000149050 | ZNF214   | 1 | 1.033519553 |
| ENSG00000149054 | ZNF215   | 1 | 0.613407821 |
| ENSG00000149136 | SSRP1    | 1 | 0.340699816 |
| ENSG00000149257 | SERPINH1 | 1 | 1.033519553 |
| ENSG00000149295 | DRD2     | 1 | 1.033519553 |
| ENSG00000149305 | HTR3B    | 1 | 0.613407821 |
| ENSG00000149346 | SLX4IP   | 1 | 0.340699816 |
| ENSG00000149418 | ST14     | 1 | 0.613407821 |
| ENSG00000149428 | HYOU1    | 1 | 0.613407821 |
| ENSG00000149480 | MTA2     | 1 | 0.340699816 |
| ENSG00000149488 | TMC2     | 1 | 1.033519553 |
| ENSG00000149534 | MS4A2    | 1 | 0.340699816 |
| ENSG00000149541 | B3GAT3   | 1 | 0.340699816 |
| ENSG00000149547 | EI24     | 1 | 0.340699816 |
| ENSG00000149548 | CCDC15   | 1 | 1.033519553 |
| ENSG00000149564 | ESAM     | 1 | 1.033519553 |
| ENSG00000149575 | SCN2B    | 1 | 0.340699816 |
| ENSG00000149582 | TMEM25   | 1 | 0.340699816 |
| ENSG00000149600 | COMMD7   | 1 | 0.340699816 |
| ENSG00000149634 | SPATA25  | 1 | 0.340699816 |

|                 |          |   |             |
|-----------------|----------|---|-------------|
| ENSG00000149635 | OCSTAMP  | 1 | 0.340699816 |
| ENSG00000149639 | SOGA1    | 1 | 1.033519553 |
| ENSG00000149654 | CDH22    | 1 | 1.033519553 |
| ENSG00000149657 | LSM14B   | 1 | 0.340699816 |
| ENSG00000149679 | CABLES2  | 1 | 1.033519553 |
| ENSG00000149809 | TM7SF2   | 1 | 1.033519553 |
| ENSG00000149932 | TMEM219  | 1 | 0.340699816 |
| ENSG00000150045 | KLRF1    | 1 | 0.340699816 |
| ENSG00000150048 | CLEC1A   | 1 | 1.033519553 |
| ENSG00000150051 | MKX      | 1 | 0.613407821 |
| ENSG00000150261 | OR8K1    | 1 | 0.340699816 |
| ENSG00000150269 | OR5M9    | 1 | 1.033519553 |
| ENSG00000150347 | ARID5B   | 1 | 0.340699816 |
| ENSG00000150394 | CDH8     | 1 | 1.033519553 |
| ENSG00000150457 | LATS2    | 1 | 1.033898305 |
| ENSG00000150471 | LPHN3    | 1 | 0.795555556 |
| ENSG00000150526 | MIA2     | 1 | 1.033519553 |
| ENSG00000150527 | CTAGE5   | 1 | 0.730427764 |
| ENSG00000150627 | WDR17    | 1 | 0.795555556 |
| ENSG00000150636 | CCDC102B | 1 | 0.613407821 |
| ENSG00000150656 | CNDP1    | 1 | 0.340699816 |
| ENSG00000150676 | CCDC83   | 1 | 1.033519553 |
| ENSG00000150773 | PIH1D2   | 1 | 0.340699816 |
| ENSG00000150783 | TEX12    | 1 | 0.613407821 |
| ENSG00000150867 | PIP4K2A  | 1 | 0.340699816 |
| ENSG00000150938 | CRIM1    | 1 | 1.033519553 |
| ENSG00000150995 | ITPR1    | 1 | 1.033898305 |
| ENSG00000151023 | ENKUR    | 1 | 1.033519553 |
| ENSG00000151025 | GPR158   | 1 | 0.613407821 |
| ENSG00000151093 | OXSM     | 1 | 1.033898305 |
| ENSG00000151131 | C12orf45 | 1 | 1.033898305 |
| ENSG00000151150 | ANK3     | 1 | 0.865946919 |
| ENSG00000151360 | ALLC     | 1 | 1.033519553 |
| ENSG00000151388 | ADAMTS12 | 1 | 1.033519553 |
| ENSG00000151461 | UPF2     | 1 | 1.033519553 |
| ENSG00000151466 | SCLT1    | 1 | 0.837099317 |
| ENSG00000151470 | C4orf33  | 1 | 0.340699816 |
| ENSG00000151490 | PTPRO    | 1 | 0.340699816 |
| ENSG00000151532 | VTI1A    | 1 | 0.340699816 |
| ENSG00000151552 | QDPR     | 1 | 1.033519553 |
| ENSG00000151575 | TEX9     | 1 | 1.033519553 |
| ENSG00000151640 | DPYSL4   | 1 | 0.340699816 |
| ENSG00000151650 | VENTX    | 1 | 0.340699816 |
| ENSG00000151704 | KCNJ1    | 1 | 0.340699816 |
| ENSG00000151715 | TMEM45B  | 1 | 0.340699816 |
| ENSG00000151725 | CENPU    | 1 | 1.033519553 |
| ENSG00000151748 | SAV1     | 1 | 0.340699816 |

|                 |          |   |             |
|-----------------|----------|---|-------------|
| ENSG00000151838 | CCDC175  | 1 | 1.033898305 |
| ENSG00000151849 | CENPJ    | 1 | 0.613407821 |
| ENSG00000151876 | FBXO4    | 1 | 0.340699816 |
| ENSG00000151882 | CCL28    | 1 | 0.340699816 |
| ENSG00000151917 | BEND6    | 1 | 0.340699816 |
| ENSG00000151948 | GLT1D1   | 1 | 1.033519553 |
| ENSG00000152061 | RABGAP1L | 1 | 1.033519553 |
| ENSG00000152076 | CCDC74B  | 1 | 1.033519553 |
| ENSG00000152192 | POU4F1   | 1 | 0.340699816 |
| ENSG00000152207 | CYSLTR2  | 1 | 1.033519553 |
| ENSG00000152240 | HAUS1    | 1 | 1.033519553 |
| ENSG00000152270 | PDE3B    | 1 | 0.613407821 |
| ENSG00000152292 | SH2D6    | 1 | 1.033519553 |
| ENSG00000152315 | KCNK13   | 1 | 0.340699816 |
| ENSG00000152332 | UHMK1    | 1 | 1.033519553 |
| ENSG00000152380 | FAM151B  | 1 | 0.340699816 |
| ENSG00000152382 | TADA1    | 1 | 0.340699816 |
| ENSG00000152404 | CWF19L2  | 1 | 0.340699816 |
| ENSG00000152409 | JMY      | 1 | 1.033519553 |
| ENSG00000152413 | HOMER1   | 1 | 0.340699816 |
| ENSG00000152422 | XRCC4    | 1 | 1.033898305 |
| ENSG00000152443 | ZNF776   | 1 | 0.340699816 |
| ENSG00000152464 | RPP38    | 1 | 0.340699816 |
| ENSG00000152467 | ZSCAN1   | 1 | 1.033519553 |
| ENSG00000152492 | CCDC50   | 1 | 1.033519553 |
| ENSG00000152495 | CAMK4    | 1 | 0.340699816 |
| ENSG00000152582 | SPEF2    | 1 | 1.034285714 |
| ENSG00000152592 | DMP1     | 1 | 0.613407821 |
| ENSG00000152595 | MEPE     | 1 | 1.033519553 |
| ENSG00000152620 | NADK2    | 1 | 1.033519553 |
| ENSG00000152642 | GPD1L    | 1 | 0.340699816 |
| ENSG00000152670 | DDX4     | 1 | 0.340699816 |
| ENSG00000152672 | CLEC4F   | 1 | 1.033519553 |
| ENSG00000152705 | CATSPER3 | 1 | 0.340699816 |
| ENSG00000152749 | GPR180   | 1 | 0.340699816 |
| ENSG00000152785 | BMP3     | 1 | 1.033519553 |
| ENSG00000152894 | PTPRK    | 1 | 0.613407821 |
| ENSG00000152932 | RAB3C    | 1 | 0.340699816 |
| ENSG00000152942 | RAD17    | 1 | 1.033519553 |
| ENSG00000153002 | CPB1     | 1 | 0.730427764 |
| ENSG00000153046 | CDYL     | 1 | 0.340699816 |
| ENSG00000153048 | CARHSP1  | 1 | 0.340699816 |
| ENSG00000153066 | TXNDC11  | 1 | 0.340699816 |
| ENSG00000153113 | CAST     | 1 | 0.340699816 |
| ENSG00000153157 | SYCP2L   | 1 | 0.730427764 |
| ENSG00000153230 | OR14K1   | 1 | 1.033519553 |
| ENSG00000153283 | CD96     | 1 | 1.033519553 |

|                 |           |   |             |
|-----------------|-----------|---|-------------|
| ENSG00000153292 | GPR110    | 1 | 1.033519553 |
| ENSG00000153317 | ASAP1     | 1 | 0.613407821 |
| ENSG00000153339 | TRAPPC8   | 1 | 1.034285714 |
| ENSG00000153446 | C16orf89  | 1 | 0.340699816 |
| ENSG00000153531 | ADPRHL1   | 1 | 0.613407821 |
| ENSG00000153767 | GTF2E1    | 1 | 1.033519553 |
| ENSG00000153790 | C7orf31   | 1 | 0.340699816 |
| ENSG00000153802 | TMPRSS11D | 1 | 0.340699816 |
| ENSG00000153896 | ZNF599    | 1 | 0.795555556 |
| ENSG00000153914 | SREK1     | 1 | 1.033519553 |
| ENSG00000154007 | ASB17     | 1 | 0.340699816 |
| ENSG00000154040 | CABYR     | 1 | 1.033519553 |
| ENSG00000154059 | IMPACT    | 1 | 0.340699816 |
| ENSG00000154099 | DNAAF1    | 1 | 0.613407821 |
| ENSG00000154127 | UBASH3B   | 1 | 0.340699816 |
| ENSG00000154144 | TBRG1     | 1 | 0.340699816 |
| ENSG00000154237 | LRRK1     | 1 | 1.034682081 |
| ENSG00000154240 | CEP112    | 1 | 1.033519553 |
| ENSG00000154258 | ABCA9     | 1 | 0.730427764 |
| ENSG00000154265 | ABCA5     | 1 | 1.033898305 |
| ENSG00000154305 | MIA3      | 1 | 0.887179487 |
| ENSG00000154309 | DISP1     | 1 | 1.033519553 |
| ENSG00000154310 | TNIK      | 1 | 0.613407821 |
| ENSG00000154447 | SH3RF1    | 1 | 0.613407821 |
| ENSG00000154451 | GBP5      | 1 | 1.033519553 |
| ENSG00000154485 | MMP21     | 1 | 1.033519553 |
| ENSG00000154493 | C10orf90  | 1 | 0.613407821 |
| ENSG00000154719 | MRPL39    | 1 | 1.033519553 |
| ENSG00000154734 | ADAMTS1   | 1 | 0.340699816 |
| ENSG00000154743 | TSEN2     | 1 | 1.033519553 |
| ENSG00000154767 | XPC       | 1 | 0.340699816 |
| ENSG00000154781 | CCDC174   | 1 | 1.033898305 |
| ENSG00000154783 | FGD5      | 1 | 1.034285714 |
| ENSG00000154822 | PLCL2     | 1 | 0.340699816 |
| ENSG00000154864 | PIEZO2    | 1 | 0.613407821 |
| ENSG00000154889 | MPPE1     | 1 | 0.340699816 |
| ENSG00000154920 | EME1      | 1 | 1.033898305 |
| ENSG00000154945 | ANKRD40   | 1 | 1.033519553 |
| ENSG00000154957 | ZNF18     | 1 | 0.340699816 |
| ENSG00000155096 | AZIN1     | 1 | 0.613407821 |
| ENSG00000155100 | OTUD6B    | 1 | 0.340699816 |
| ENSG00000155158 | TTC39B    | 1 | 0.340699816 |
| ENSG00000155189 | AGPAT5    | 1 | 0.340699816 |
| ENSG00000155249 | OR4K1     | 1 | 0.613407821 |
| ENSG00000155252 | PI4K2A    | 1 | 0.340699816 |
| ENSG00000155256 | ZFYVE27   | 1 | 1.033519553 |
| ENSG00000155265 | GOLGA7B   | 1 | 1.033519553 |

|                 |           |   |             |
|-----------------|-----------|---|-------------|
| ENSG00000155275 | TRMT44    | 1 | 1.033898305 |
| ENSG00000155304 | HSPA13    | 1 | 0.340699816 |
| ENSG00000155313 | USP25     | 1 | 0.613407821 |
| ENSG00000155324 | GRAMD3    | 1 | 0.340699816 |
| ENSG00000155368 | DBI       | 1 | 1.033519553 |
| ENSG00000155463 | OXA1L     | 1 | 0.340699816 |
| ENSG00000155465 | SLC7A7    | 1 | 0.613407821 |
| ENSG00000155506 | LARP1     | 1 | 1.033519553 |
| ENSG00000155530 | LRGUK     | 1 | 1.034682081 |
| ENSG00000155659 | VSIG4     | 1 | 1.033519553 |
| ENSG00000155666 | KDM8      | 1 | 1.033519553 |
| ENSG00000155714 | PDZD9     | 1 | 0.340699816 |
| ENSG00000155816 | FMN2      | 1 | 0.613407821 |
| ENSG00000155833 | CYLC2     | 1 | 1.034285714 |
| ENSG00000155875 | FAM154A   | 1 | 0.340699816 |
| ENSG00000155890 | TRIM42    | 1 | 1.034285714 |
| ENSG00000155903 | RASA2     | 1 | 1.033519553 |
| ENSG00000155906 | RMND1     | 1 | 1.033519553 |
| ENSG00000155926 | SLA       | 1 | 1.033898305 |
| ENSG00000155980 | KIF5A     | 1 | 1.033519553 |
| ENSG00000156026 | MCU       | 1 | 0.340699816 |
| ENSG00000156096 | UGT2B4    | 1 | 0.340699816 |
| ENSG00000156140 | ADAMTS3   | 1 | 1.034682081 |
| ENSG00000156170 | NDUFAF6   | 1 | 0.340699816 |
| ENSG00000156194 | PPEF2     | 1 | 0.613407821 |
| ENSG00000156218 | ADAMTSL3  | 1 | 1.034285714 |
| ENSG00000156222 | SLC28A1   | 1 | 1.033898305 |
| ENSG00000156273 | BACH1     | 1 | 0.340699816 |
| ENSG00000156304 | SCAF4     | 1 | 0.340699816 |
| ENSG00000156398 | SFXN2     | 1 | 1.033519553 |
| ENSG00000156414 | TDRD9     | 1 | 1.033898305 |
| ENSG00000156471 | PTDSS1    | 1 | 0.340699816 |
| ENSG00000156475 | PPP2R2B   | 1 | 0.340699816 |
| ENSG00000156521 | TYSND1    | 1 | 1.033519553 |
| ENSG00000156642 | NPTN      | 1 | 0.340699816 |
| ENSG00000156650 | KAT6B     | 1 | 1.033519553 |
| ENSG00000156671 | SAMD8     | 1 | 0.340699816 |
| ENSG00000156675 | RAB11FIP1 | 1 | 0.730427764 |
| ENSG00000156738 | MS4A1     | 1 | 0.340699816 |
| ENSG00000156875 | HIAT1     | 1 | 0.340699816 |
| ENSG00000156876 | SASS6     | 1 | 0.340699816 |
| ENSG00000156886 | ITGAD     | 1 | 1.033519553 |
| ENSG00000156958 | GALK2     | 1 | 0.340699816 |
| ENSG00000156970 | BUB1B     | 1 | 1.033519553 |
| ENSG00000157020 | SEC13     | 1 | 1.033519553 |
| ENSG00000157036 | EXOG      | 1 | 0.340699816 |
| ENSG00000157060 | SHCBP1L   | 1 | 1.033519553 |

|                 |          |   |             |
|-----------------|----------|---|-------------|
| ENSG00000157107 | FCHO2    | 1 | 0.340699816 |
| ENSG00000157119 | KLHL40   | 1 | 1.033519553 |
| ENSG00000157211 | CDCP2    | 1 | 1.033519553 |
| ENSG00000157214 | STEAP2   | 1 | 0.340699816 |
| ENSG00000157219 | HTR5A    | 1 | 1.033519553 |
| ENSG00000157224 | CLDN12   | 1 | 0.340699816 |
| ENSG00000157315 | TMED6    | 1 | 0.340699816 |
| ENSG00000157388 | CACNA1D  | 1 | 1.033519553 |
| ENSG00000157426 | AASDH    | 1 | 1.033898305 |
| ENSG00000157445 | CACNA2D3 | 1 | 0.730427764 |
| ENSG00000157456 | CCNB2    | 1 | 1.033519553 |
| ENSG00000157500 | APPL1    | 1 | 1.033519553 |
| ENSG00000157551 | KCNJ15   | 1 | 1.033519553 |
| ENSG00000157554 | ERG      | 1 | 0.340699816 |
| ENSG00000157601 | MX1      | 1 | 0.340699816 |
| ENSG00000157613 | CREB3L1  | 1 | 1.033898305 |
| ENSG00000157653 | C9orf43  | 1 | 0.340699816 |
| ENSG00000157766 | ACAN     | 1 | 0.730427764 |
| ENSG00000157796 | WDR19    | 1 | 1.033519553 |
| ENSG00000157851 | DPYSL5   | 1 | 0.340699816 |
| ENSG00000157856 | DRC1     | 1 | 1.033898305 |
| ENSG00000157870 | FAM213B  | 1 | 0.340699816 |
| ENSG00000157895 | C12orf43 | 1 | 1.033519553 |
| ENSG00000158008 | EXTL1    | 1 | 1.033898305 |
| ENSG00000158019 | BRE      | 1 | 0.340699816 |
| ENSG00000158023 | WDR66    | 1 | 1.034285714 |
| ENSG00000158109 | TPRG1L   | 1 | 1.033519553 |
| ENSG00000158156 | XKR8     | 1 | 0.340699816 |
| ENSG00000158163 | DZIP1L   | 1 | 1.033519553 |
| ENSG00000158286 | RNF207   | 1 | 0.340699816 |
| ENSG00000158315 | RHBDL2   | 1 | 0.613407821 |
| ENSG00000158417 | EIF5B    | 1 | 0.613407821 |
| ENSG00000158445 | KCNB1    | 1 | 0.340699816 |
| ENSG00000158470 | B4GALT5  | 1 | 0.340699816 |
| ENSG00000158552 | ZFAND2B  | 1 | 0.340699816 |
| ENSG00000158636 | C11orf30 | 1 | 0.340699816 |
| ENSG00000158639 | PAGE5    | 1 | 1.033519553 |
| ENSG00000158850 | B4GALT3  | 1 | 0.340699816 |
| ENSG00000158863 | FAM160B2 | 1 | 1.033519553 |
| ENSG00000158864 | NDUFS2   | 1 | 0.340699816 |
| ENSG00000158882 | TOMM40L  | 1 | 0.340699816 |
| ENSG00000158941 | CCAR2    | 1 | 1.033898305 |
| ENSG00000158966 | CACHD1   | 1 | 1.033519553 |
| ENSG00000158987 | RAPGEF6  | 1 | 1.033519553 |
| ENSG00000159023 | EPB41    | 1 | 0.340699816 |
| ENSG00000159063 | ALG8     | 1 | 0.340699816 |
| ENSG00000159079 | C21orf59 | 1 | 0.340699816 |

|                 |            |   |             |
|-----------------|------------|---|-------------|
| ENSG00000159082 | SYNJ1      | 1 | 0.730427764 |
| ENSG00000159111 | MRPL10     | 1 | 0.340699816 |
| ENSG00000159166 | LAD1       | 1 | 1.033519553 |
| ENSG00000159261 | CLDN14     | 1 | 1.033519553 |
| ENSG00000159314 | ARHGAP27   | 1 | 1.033519553 |
| ENSG00000159363 | ATP13A2    | 1 | 0.340699816 |
| ENSG00000159398 | CES5A      | 1 | 1.033519553 |
| ENSG00000159399 | HK2        | 1 | 0.340699816 |
| ENSG00000159459 | UBR1       | 1 | 1.034285714 |
| ENSG00000159495 | TGM7       | 1 | 1.033519553 |
| ENSG00000159496 | RGL4       | 1 | 0.340699816 |
| ENSG00000159708 | LRRC36     | 1 | 0.340699816 |
| ENSG00000159882 | ZNF230     | 1 | 0.340699816 |
| ENSG00000159885 | ZNF222     | 1 | 1.033898305 |
| ENSG00000159917 | ZNF235     | 1 | 0.730427764 |
| ENSG00000160013 | PTGIR      | 1 | 0.340699816 |
| ENSG00000160179 | ABCG1      | 1 | 1.033519553 |
| ENSG00000160183 | TMPRSS3    | 1 | 1.033519553 |
| ENSG00000160185 | UBASH3A    | 1 | 0.613407821 |
| ENSG00000160193 | WDR4       | 1 | 1.033519553 |
| ENSG00000160194 | NDUFV3     | 1 | 0.613407821 |
| ENSG00000160214 | RRP1       | 1 | 0.613407821 |
| ENSG00000160224 | AIRE       | 1 | 1.033898305 |
| ENSG00000160285 | LSS        | 1 | 0.730427764 |
| ENSG00000160298 | C21orf58   | 1 | 1.033519553 |
| ENSG00000160305 | DIP2A      | 1 | 0.340699816 |
| ENSG00000160310 | PRMT2      | 1 | 0.340699816 |
| ENSG00000160318 | CLDND2     | 1 | 0.340699816 |
| ENSG00000160339 | FCN2       | 1 | 1.033519553 |
| ENSG00000160349 | LCN1       | 1 | 1.033519553 |
| ENSG00000160360 | GPSM1      | 1 | 1.033898305 |
| ENSG00000160401 | C9orf117   | 1 | 0.340699816 |
| ENSG00000160408 | ST6GALNAC6 | 1 | 1.033519553 |
| ENSG00000160445 | ZER1       | 1 | 0.340699816 |
| ENSG00000160446 | ZDHC12     | 1 | 0.613407821 |
| ENSG00000160593 | AMICA1     | 1 | 1.033519553 |
| ENSG00000160633 | SAFB       | 1 | 0.340699816 |
| ENSG00000160654 | CD3G       | 1 | 1.033519553 |
| ENSG00000160688 | FLAD1      | 1 | 0.340699816 |
| ENSG00000160695 | VPS11      | 1 | 1.033519553 |
| ENSG00000160710 | ADAR       | 1 | 0.340699816 |
| ENSG00000160712 | IL6R       | 1 | 0.340699816 |
| ENSG00000160752 | FDPS       | 1 | 1.033519553 |
| ENSG00000160753 | RUSC1      | 1 | 1.033519553 |
| ENSG00000160789 | LMNA       | 1 | 1.033519553 |
| ENSG00000160801 | PTH1R      | 1 | 0.730427764 |
| ENSG00000160838 | LRRC71     | 1 | 0.340699816 |

|                 |          |   |             |
|-----------------|----------|---|-------------|
| ENSG00000160844 | GATS     | 1 | 0.340699816 |
| ENSG00000160868 | CYP3A4   | 1 | 0.340699816 |
| ENSG00000160953 | MUM1     | 1 | 1.033519553 |
| ENSG00000160959 | LRRC14   | 1 | 0.340699816 |
| ENSG00000160993 | ALKBH4   | 1 | 0.340699816 |
| ENSG00000161016 | RPL8     | 1 | 0.340699816 |
| ENSG00000161036 | LRWD1    | 1 | 0.340699816 |
| ENSG00000161040 | FBXL13   | 1 | 1.033519553 |
| ENSG00000161048 | NAPEPLD  | 1 | 0.613407821 |
| ENSG00000161133 | USP41    | 1 | 1.033519553 |
| ENSG00000161217 | PCYT1A   | 1 | 0.340699816 |
| ENSG00000161243 | FBXO27   | 1 | 0.340699816 |
| ENSG00000161270 | NPHS1    | 1 | 0.340699816 |
| ENSG00000161277 | THAP8    | 1 | 1.033519553 |
| ENSG00000161298 | ZNF382   | 1 | 1.033519553 |
| ENSG00000161381 | PLXDC1   | 1 | 1.033519553 |
| ENSG00000161395 | PGAP3    | 1 | 0.340699816 |
| ENSG00000161513 | FDXR     | 1 | 0.613407821 |
| ENSG00000161526 | SAP30BP  | 1 | 1.033519553 |
| ENSG00000161558 | TMEM143  | 1 | 1.033898305 |
| ENSG00000161640 | SIGLEC11 | 1 | 1.033519553 |
| ENSG00000161652 | IZUMO2   | 1 | 0.613407821 |
| ENSG00000161671 | EMC10    | 1 | 0.340699816 |
| ENSG00000161692 | DBF4B    | 1 | 1.033519553 |
| ENSG00000161791 | FMNL3    | 1 | 0.613407821 |
| ENSG00000161847 | RAVER1   | 1 | 0.340699816 |
| ENSG00000161849 | KRT84    | 1 | 0.730427764 |
| ENSG00000161896 | IP6K3    | 1 | 1.034285714 |
| ENSG00000161940 | BCL6B    | 1 | 0.340699816 |
| ENSG00000161999 | JMJD8    | 1 | 0.340699816 |
| ENSG00000162009 | SSTR5    | 1 | 1.033519553 |
| ENSG00000162032 | SPSB3    | 1 | 1.033519553 |
| ENSG00000162040 | HS3ST6   | 1 | 0.340699816 |
| ENSG00000162062 | C16orf59 | 1 | 0.340699816 |
| ENSG00000162063 | CCNF     | 1 | 0.340699816 |
| ENSG00000162066 | AMDHD2   | 1 | 1.033519553 |
| ENSG00000162105 | SHANK2   | 1 | 0.613407821 |
| ENSG00000162191 | UBXN1    | 1 | 0.340699816 |
| ENSG00000162194 | C11orf48 | 1 | 0.340699816 |
| ENSG00000162236 | STX5     | 1 | 0.340699816 |
| ENSG00000162267 | ITIH3    | 1 | 1.033519553 |
| ENSG00000162341 | TPCN2    | 1 | 1.033519553 |
| ENSG00000162390 | ACOT11   | 1 | 0.340699816 |
| ENSG00000162402 | USP24    | 1 | 1.033898305 |
| ENSG00000162409 | PRKAA2   | 1 | 0.340699816 |
| ENSG00000162415 | ZSWIM5   | 1 | 0.795555556 |
| ENSG00000162419 | GMEB1    | 1 | 0.340699816 |

|                 |          |   |             |
|-----------------|----------|---|-------------|
| ENSG00000162426 | SLC45A1  | 1 | 0.340699816 |
| ENSG00000162438 | CTRC     | 1 | 0.613407821 |
| ENSG00000162456 | KNCN     | 1 | 0.613407821 |
| ENSG00000162461 | SLC25A34 | 1 | 0.340699816 |
| ENSG00000162494 | LRRC38   | 1 | 1.033519553 |
| ENSG00000162512 | SDC3     | 1 | 0.340699816 |
| ENSG00000162522 | KIAA1522 | 1 | 1.033898305 |
| ENSG00000162542 | TMCO4    | 1 | 0.795555556 |
| ENSG00000162592 | CCDC27   | 1 | 1.033898305 |
| ENSG00000162601 | MYSM1    | 1 | 0.613407821 |
| ENSG00000162614 | NEXN     | 1 | 1.033519553 |
| ENSG00000162621 | LRRC53   | 1 | 0.340699816 |
| ENSG00000162627 | SNX7     | 1 | 1.033898305 |
| ENSG00000162687 | KCNT2    | 1 | 1.033519553 |
| ENSG00000162706 | CADM3    | 1 | 1.033519553 |
| ENSG00000162711 | NLRP3    | 1 | 0.613407821 |
| ENSG00000162714 | ZNF496   | 1 | 0.340699816 |
| ENSG00000162729 | IGSF8    | 1 | 0.340699816 |
| ENSG00000162736 | NCSTN    | 1 | 0.340699816 |
| ENSG00000162739 | SLAMF6   | 1 | 0.340699816 |
| ENSG00000162763 | LRRC52   | 1 | 0.730427764 |
| ENSG00000162769 | FLVCR1   | 1 | 0.340699816 |
| ENSG00000162817 | C1orf115 | 1 | 1.033519553 |
| ENSG00000162849 | KIF26B   | 1 | 1.033519553 |
| ENSG00000162851 | TFB2M    | 1 | 0.730427764 |
| ENSG00000162852 | CNST     | 1 | 0.340699816 |
| ENSG00000162869 | PPP1R21  | 1 | 1.033519553 |
| ENSG00000162892 | IL24     | 1 | 0.340699816 |
| ENSG00000162894 | FAIM3    | 1 | 0.340699816 |
| ENSG00000162927 | PUS10    | 1 | 0.340699816 |
| ENSG00000162972 | C2orf47  | 1 | 1.033898305 |
| ENSG00000162989 | KCNJ3    | 1 | 1.033519553 |
| ENSG00000162999 | DUSP19   | 1 | 0.340699816 |
| ENSG00000163006 | CCDC138  | 1 | 1.033519553 |
| ENSG00000163009 | C2orf48  | 1 | 0.340699816 |
| ENSG00000163069 | SGCB     | 1 | 1.033519553 |
| ENSG00000163081 | CCDC140  | 1 | 0.340699816 |
| ENSG00000163083 | INHBB    | 1 | 0.340699816 |
| ENSG00000163110 | PDLIM5   | 1 | 1.034285714 |
| ENSG00000163116 | STPG2    | 1 | 0.613407821 |
| ENSG00000163125 | RPRD2    | 1 | 1.033519553 |
| ENSG00000163126 | ANKRD23  | 1 | 0.340699816 |
| ENSG00000163170 | BOLA3    | 1 | 0.340699816 |
| ENSG00000163207 | IVL      | 1 | 0.340699816 |
| ENSG00000163214 | DHX57    | 1 | 1.034285714 |
| ENSG00000163219 | ARHGAP25 | 1 | 1.033898305 |
| ENSG00000163281 | GNPDA2   | 1 | 0.340699816 |

|                 |          |   |             |
|-----------------|----------|---|-------------|
| ENSG00000163283 | ALPP     | 1 | 1.033519553 |
| ENSG00000163285 | GABRG1   | 1 | 0.340699816 |
| ENSG00000163328 | GPR155   | 1 | 0.340699816 |
| ENSG00000163354 | DCST2    | 1 | 1.033519553 |
| ENSG00000163378 | EOGT     | 1 | 1.033519553 |
| ENSG00000163380 | LMOD3    | 1 | 0.340699816 |
| ENSG00000163393 | SLC22A15 | 1 | 0.340699816 |
| ENSG00000163424 | C3orf30  | 1 | 1.033519553 |
| ENSG00000163435 | ELF3     | 1 | 0.613407821 |
| ENSG00000163462 | TRIM46   | 1 | 1.033519553 |
| ENSG00000163464 | CXCR1    | 1 | 1.033519553 |
| ENSG00000163472 | TMEM79   | 1 | 0.613407821 |
| ENSG00000163481 | RNF25    | 1 | 0.613407821 |
| ENSG00000163499 | CRYBA2   | 1 | 1.033519553 |
| ENSG00000163515 | RETNLB   | 1 | 0.340699816 |
| ENSG00000163521 | GLB1L    | 1 | 0.340699816 |
| ENSG00000163535 | SGOL2    | 1 | 1.033898305 |
| ENSG00000163545 | NUAK2    | 1 | 1.034285714 |
| ENSG00000163554 | SPTA1    | 1 | 1.034682081 |
| ENSG00000163576 | EFHB     | 1 | 1.033898305 |
| ENSG00000163605 | PPP4R2   | 1 | 0.340699816 |
| ENSG00000163608 | C3orf17  | 1 | 0.795555556 |
| ENSG00000163618 | CADPS    | 1 | 0.340699816 |
| ENSG00000163624 | CDS1     | 1 | 1.033898305 |
| ENSG00000163630 | SYNPR    | 1 | 0.340699816 |
| ENSG00000163636 | PSMD6    | 1 | 0.340699816 |
| ENSG00000163638 | ADAMTS9  | 1 | 1.033519553 |
| ENSG00000163645 | FAM194A  | 1 | 0.730427764 |
| ENSG00000163659 | TIPARP   | 1 | 0.340699816 |
| ENSG00000163689 | C3orf67  | 1 | 1.033519553 |
| ENSG00000163694 | RBM47    | 1 | 1.033898305 |
| ENSG00000163702 | IL17RC   | 1 | 1.035087719 |
| ENSG00000163703 | CRELD1   | 1 | 1.033519553 |
| ENSG00000163728 | TTC14    | 1 | 0.340699816 |
| ENSG00000163738 | MTHFD2L  | 1 | 1.033519553 |
| ENSG00000163749 | CCDC158  | 1 | 1.033519553 |
| ENSG00000163762 | TM4SF18  | 1 | 0.340699816 |
| ENSG00000163788 | SNRK     | 1 | 1.033519553 |
| ENSG00000163795 | ZNF513   | 1 | 1.033519553 |
| ENSG00000163798 | SLC4A1AP | 1 | 1.033519553 |
| ENSG00000163803 | PLB1     | 1 | 1.034682081 |
| ENSG00000163812 | ZDHHC3   | 1 | 0.340699816 |
| ENSG00000163814 | CDCP1    | 1 | 1.033898305 |
| ENSG00000163820 | FYCO1    | 1 | 1.033898305 |
| ENSG00000163827 | LRRC2    | 1 | 1.033898305 |
| ENSG00000163840 | DTX3L    | 1 | 0.340699816 |
| ENSG00000163870 | TPRA1    | 1 | 0.340699816 |

|                 |          |   |             |
|-----------------|----------|---|-------------|
| ENSG00000163884 | KLF15    | 1 | 0.340699816 |
| ENSG00000163885 | CCDC37   | 1 | 1.033898305 |
| ENSG00000163918 | RFC4     | 1 | 0.613407821 |
| ENSG00000163931 | TKT      | 1 | 1.033519553 |
| ENSG00000163932 | PRKCD    | 1 | 1.033519553 |
| ENSG00000163950 | SLBP     | 1 | 1.033519553 |
| ENSG00000163960 | UBXN7    | 1 | 0.340699816 |
| ENSG00000164007 | CLDN19   | 1 | 1.033519553 |
| ENSG00000164038 | SLC9B2   | 1 | 1.033519553 |
| ENSG00000164051 | CCDC51   | 1 | 1.033519553 |
| ENSG00000164053 | ATRIP    | 1 | 1.033898305 |
| ENSG00000164056 | SPRY1    | 1 | 0.340699816 |
| ENSG00000164073 | MFSD8    | 1 | 0.340699816 |
| ENSG00000164082 | GRM2     | 1 | 0.340699816 |
| ENSG00000164096 | C4orf3   | 1 | 0.340699816 |
| ENSG00000164111 | ANXA5    | 1 | 1.033898305 |
| ENSG00000164114 | MAP9     | 1 | 1.033519553 |
| ENSG00000164116 | GUCY1A3  | 1 | 0.340699816 |
| ENSG00000164122 | ASB5     | 1 | 1.033519553 |
| ENSG00000164124 | TMEM144  | 1 | 0.340699816 |
| ENSG00000164128 | NPY1R    | 1 | 0.340699816 |
| ENSG00000164129 | NPY5R    | 1 | 0.340699816 |
| ENSG00000164136 | IL15     | 1 | 0.340699816 |
| ENSG00000164142 | FAM160A1 | 1 | 0.613407821 |
| ENSG00000164144 | ARFIP1   | 1 | 0.340699816 |
| ENSG00000164172 | MOCS2    | 1 | 0.340699816 |
| ENSG00000164175 | SLC45A2  | 1 | 0.340699816 |
| ENSG00000164176 | EDIL3    | 1 | 1.033519553 |
| ENSG00000164180 | TMEM161B | 1 | 0.340699816 |
| ENSG00000164181 | ELOVL7   | 1 | 0.340699816 |
| ENSG00000164185 | ZNF474   | 1 | 0.340699816 |
| ENSG00000164188 | RANBP3L  | 1 | 0.340699816 |
| ENSG00000164190 | NIPBL    | 1 | 0.340699816 |
| ENSG00000164197 | RNF180   | 1 | 1.033519553 |
| ENSG00000164252 | AGGF1    | 1 | 1.033519553 |
| ENSG00000164265 | SCGB3A2  | 1 | 0.340699816 |
| ENSG00000164291 | ARSK     | 1 | 1.033898305 |
| ENSG00000164292 | RHOBTB3  | 1 | 0.340699816 |
| ENSG00000164307 | ERAP1    | 1 | 1.033898305 |
| ENSG00000164318 | EGFLAM   | 1 | 1.034682081 |
| ENSG00000164323 | KIAA1430 | 1 | 1.033519553 |
| ENSG00000164331 | ANKRA2   | 1 | 0.340699816 |
| ENSG00000164334 | FAM170A  | 1 | 0.340699816 |
| ENSG00000164342 | TLR3     | 1 | 1.033519553 |
| ENSG00000164398 | ACSL6    | 1 | 0.340699816 |
| ENSG00000164399 | IL3      | 1 | 0.340699816 |
| ENSG00000164411 | GJB7     | 1 | 1.033519553 |

|                 |           |   |             |
|-----------------|-----------|---|-------------|
| ENSG00000164442 | CITED2    | 1 | 1.033519553 |
| ENSG00000164465 | DCBLD1    | 1 | 0.340699816 |
| ENSG00000164484 | TMEM200A  | 1 | 1.033519553 |
| ENSG00000164488 | DACT2     | 1 | 1.033898305 |
| ENSG00000164509 | IL31RA    | 1 | 0.340699816 |
| ENSG00000164548 | TRA2A     | 1 | 0.340699816 |
| ENSG00000164603 | C7orf60   | 1 | 0.340699816 |
| ENSG00000164627 | KIF6      | 1 | 0.340699816 |
| ENSG00000164631 | ZNF12     | 1 | 1.033519553 |
| ENSG00000164645 | C7orf62   | 1 | 0.340699816 |
| ENSG00000164674 | SYTL3     | 1 | 1.033519553 |
| ENSG00000164675 | IQUB      | 1 | 0.340699816 |
| ENSG00000164708 | PGAM2     | 1 | 0.340699816 |
| ENSG00000164715 | LMTK2     | 1 | 1.034285714 |
| ENSG00000164733 | CTSB      | 1 | 0.613407821 |
| ENSG00000164744 | SUN3      | 1 | 0.340699816 |
| ENSG00000164746 | C7orf57   | 1 | 1.033519553 |
| ENSG00000164751 | PEX2      | 1 | 1.033519553 |
| ENSG00000164764 | SBSPON    | 1 | 0.340699816 |
| ENSG00000164815 | ORC5      | 1 | 0.340699816 |
| ENSG00000164880 | INTS1     | 1 | 1.033519553 |
| ENSG00000164897 | TMUB1     | 1 | 0.340699816 |
| ENSG00000164902 | PHAX      | 1 | 1.033519553 |
| ENSG00000164941 | INTS8     | 1 | 0.340699816 |
| ENSG00000164944 | KIAA1429  | 1 | 1.033898305 |
| ENSG00000164975 | SNAPC3    | 1 | 1.033898305 |
| ENSG00000164976 | KIAA1161  | 1 | 1.033519553 |
| ENSG00000164989 | CCDC171   | 1 | 0.613407821 |
| ENSG00000165028 | NIPSNAP3B | 1 | 1.033519553 |
| ENSG00000165030 | NFIL3     | 1 | 1.033519553 |
| ENSG00000165060 | FXN       | 1 | 1.033519553 |
| ENSG00000165072 | MAMDC2    | 1 | 1.033519553 |
| ENSG00000165078 | CPA6      | 1 | 1.033519553 |
| ENSG00000165084 | C8orf34   | 1 | 0.340699816 |
| ENSG00000165164 | CXorf22   | 1 | 1.033519553 |
| ENSG00000165171 | WBSCR27   | 1 | 0.340699816 |
| ENSG00000165182 | CXorf58   | 1 | 1.033519553 |
| ENSG00000165186 | PTCHD1    | 1 | 0.340699816 |
| ENSG00000165204 | OR1K1     | 1 | 0.340699816 |
| ENSG00000165275 | TRMT10B   | 1 | 0.340699816 |
| ENSG00000165282 | PIGO      | 1 | 0.340699816 |
| ENSG00000165325 | CCDC67    | 1 | 0.340699816 |
| ENSG00000165338 | HECTD2    | 1 | 0.340699816 |
| ENSG00000165416 | SUGT1     | 1 | 0.613407821 |
| ENSG00000165424 | ZCCHC24   | 1 | 1.033519553 |
| ENSG00000165434 | PGM2L1    | 1 | 0.340699816 |
| ENSG00000165487 | MICU2     | 1 | 0.340699816 |

|                 |          |   |             |
|-----------------|----------|---|-------------|
| ENSG00000165494 | PCF11    | 1 | 0.613407821 |
| ENSG00000165506 | DNAAF2   | 1 | 1.033519553 |
| ENSG00000165507 | C10orf10 | 1 | 1.033519553 |
| ENSG00000165521 | EML5     | 1 | 1.033519553 |
| ENSG00000165526 | RPUSD4   | 1 | 1.033519553 |
| ENSG00000165533 | TTC8     | 1 | 0.613407821 |
| ENSG00000165568 | AKR1E2   | 1 | 0.340699816 |
| ENSG00000165572 | KBTBD6   | 1 | 0.340699816 |
| ENSG00000165621 | OXGR1    | 1 | 1.033519553 |
| ENSG00000165626 | BEND7    | 1 | 0.340699816 |
| ENSG00000165633 | VSTM4    | 1 | 1.033519553 |
| ENSG00000165643 | SOHLH1   | 1 | 0.340699816 |
| ENSG00000165644 | COMTD1   | 1 | 0.340699816 |
| ENSG00000165659 | DACH1    | 1 | 0.340699816 |
| ENSG00000165660 | FAM175B  | 1 | 0.340699816 |
| ENSG00000165661 | QSOX2    | 1 | 1.033898305 |
| ENSG00000165671 | NSD1     | 1 | 1.033898305 |
| ENSG00000165672 | PRDX3    | 1 | 0.613407821 |
| ENSG00000165689 | SDCCAG3  | 1 | 1.033519553 |
| ENSG00000165731 | RET      | 1 | 0.340699816 |
| ENSG00000165733 | BMS1     | 1 | 1.033519553 |
| ENSG00000165752 | STK32C   | 1 | 0.613407821 |
| ENSG00000165792 | METTL17  | 1 | 1.033898305 |
| ENSG00000165799 | RNASE7   | 1 | 1.033519553 |
| ENSG00000165801 | ARHGEF40 | 1 | 0.730427764 |
| ENSG00000165837 | FAM194B  | 1 | 1.033519553 |
| ENSG00000165868 | HSPA12A  | 1 | 1.033519553 |
| ENSG00000165905 | GYLTL1B  | 1 | 1.033519553 |
| ENSG00000165917 | RAPSN    | 1 | 0.340699816 |
| ENSG00000165929 | TC2N     | 1 | 0.613407821 |
| ENSG00000165934 | CPSF2    | 1 | 0.340699816 |
| ENSG00000165948 | IFI27L1  | 1 | 0.340699816 |
| ENSG00000165972 | CCDC38   | 1 | 0.340699816 |
| ENSG00000166004 | KIAA1731 | 1 | 1.033898305 |
| ENSG00000166006 | KCNC2    | 1 | 0.340699816 |
| ENSG00000166024 | R3HCC1L  | 1 | 1.033898305 |
| ENSG00000166037 | CEP57    | 1 | 0.340699816 |
| ENSG00000166046 | TCP11L2  | 1 | 0.340699816 |
| ENSG00000166106 | ADAMTS15 | 1 | 1.033519553 |
| ENSG00000166118 | SPATA19  | 1 | 0.340699816 |
| ENSG00000166133 | RPUSD2   | 1 | 1.033519553 |
| ENSG00000166147 | FBN1     | 1 | 1.034285714 |
| ENSG00000166152 | C16orf78 | 1 | 1.033898305 |
| ENSG00000166157 | TPTE     | 1 | 0.730427764 |
| ENSG00000166159 | LRTM2    | 1 | 0.340699816 |
| ENSG00000166167 | BTRC     | 1 | 0.340699816 |
| ENSG00000166170 | BAG5     | 1 | 0.340699816 |

|                 |          |   |             |
|-----------------|----------|---|-------------|
| ENSG00000166197 | NOLC1    | 1 | 1.033519553 |
| ENSG00000166225 | FRS2     | 1 | 0.340699816 |
| ENSG00000166246 | C16orf71 | 1 | 1.033519553 |
| ENSG00000166261 | ZNF202   | 1 | 1.033519553 |
| ENSG00000166272 | WBP1L    | 1 | 0.340699816 |
| ENSG00000166321 | NUDT13   | 1 | 1.033519553 |
| ENSG00000166323 | C11orf65 | 1 | 0.340699816 |
| ENSG00000166349 | RAG1     | 1 | 1.033898305 |
| ENSG00000166387 | PPFIBP2  | 1 | 1.033519553 |
| ENSG00000166391 | MOGAT2   | 1 | 0.340699816 |
| ENSG00000166396 | SERPINB7 | 1 | 0.340699816 |
| ENSG00000166401 | SERPINB8 | 1 | 0.340699816 |
| ENSG00000166405 | RIC3     | 1 | 0.613407821 |
| ENSG00000166428 | PLD4     | 1 | 1.033519553 |
| ENSG00000166435 | XRRA1    | 1 | 0.340699816 |
| ENSG00000166446 | CDYL2    | 1 | 0.613407821 |
| ENSG00000166448 | TMEM130  | 1 | 0.340699816 |
| ENSG00000166454 | ATMIN    | 1 | 1.033898305 |
| ENSG00000166473 | PKD1L2   | 1 | 1.033519553 |
| ENSG00000166478 | ZNF143   | 1 | 1.033519553 |
| ENSG00000166507 | NDST2    | 1 | 1.033898305 |
| ENSG00000166529 | ZSCAN21  | 1 | 1.033519553 |
| ENSG00000166548 | TK2      | 1 | 0.340699816 |
| ENSG00000166578 | IQCD     | 1 | 0.340699816 |
| ENSG00000166579 | NDEL1    | 1 | 1.033898305 |
| ENSG00000166589 | CDH16    | 1 | 0.340699816 |
| ENSG00000166596 | WDR16    | 1 | 1.033519553 |
| ENSG00000166598 | HSP90B1  | 1 | 0.340699816 |
| ENSG00000166603 | MC4R     | 1 | 0.340699816 |
| ENSG00000166676 | TVP23A   | 1 | 0.340699816 |
| ENSG00000166682 | TMPRSS5  | 1 | 1.033519553 |
| ENSG00000166685 | COG1     | 1 | 0.613407821 |
| ENSG00000166736 | HTR3A    | 1 | 0.613407821 |
| ENSG00000166750 | SLFN5    | 1 | 1.033519553 |
| ENSG00000166780 | C16orf45 | 1 | 0.340699816 |
| ENSG00000166783 | KIAA0430 | 1 | 0.730427764 |
| ENSG00000166801 | FAM111A  | 1 | 1.033519553 |
| ENSG00000166813 | KIF7     | 1 | 0.613407821 |
| ENSG00000166819 | PLIN1    | 1 | 0.340699816 |
| ENSG00000166822 | TMEM170A | 1 | 1.033519553 |
| ENSG00000166851 | PLK1     | 1 | 0.340699816 |
| ENSG00000166855 | CLPX     | 1 | 0.613407821 |
| ENSG00000166856 | GPR182   | 1 | 0.340699816 |
| ENSG00000166860 | ZBTB39   | 1 | 0.613407821 |
| ENSG00000166869 | CHP2     | 1 | 0.340699816 |
| ENSG00000166888 | STAT6    | 1 | 1.033519553 |
| ENSG00000166900 | STX3     | 1 | 1.033519553 |

|                 |          |   |             |
|-----------------|----------|---|-------------|
| ENSG00000166923 | GREM1    | 1 | 0.340699816 |
| ENSG00000166938 | DIS3L    | 1 | 1.033519553 |
| ENSG00000166963 | MAP1A    | 1 | 1.033519553 |
| ENSG00000166971 | AKTIP    | 1 | 0.340699816 |
| ENSG00000166979 | EVA1C    | 1 | 1.033519553 |
| ENSG00000166987 | MBD6     | 1 | 1.033519553 |
| ENSG00000166997 | CNPY4    | 1 | 1.033519553 |
| ENSG00000167100 | SAMD14   | 1 | 0.340699816 |
| ENSG00000167106 | FAM102A  | 1 | 0.340699816 |
| ENSG00000167107 | ACSF2    | 1 | 0.340699816 |
| ENSG00000167110 | GOLGA2   | 1 | 1.033519553 |
| ENSG00000167123 | CERCAM   | 1 | 1.033519553 |
| ENSG00000167131 | CCDC103  | 1 | 0.340699816 |
| ENSG00000167136 | ENDOG    | 1 | 0.340699816 |
| ENSG00000167173 | C15orf39 | 1 | 1.034285714 |
| ENSG00000167183 | PRR15L   | 1 | 0.613407821 |
| ENSG00000167202 | TBC1D2B  | 1 | 1.033519553 |
| ENSG00000167232 | ZNF91    | 1 | 0.340699816 |
| ENSG00000167236 | CCL23    | 1 | 0.340699816 |
| ENSG00000167257 | RNF214   | 1 | 0.340699816 |
| ENSG00000167264 | DUS2     | 1 | 0.340699816 |
| ENSG00000167280 | ENGASE   | 1 | 0.613407821 |
| ENSG00000167306 | MYO5B    | 1 | 0.730427764 |
| ENSG00000167311 | ART5     | 1 | 0.340699816 |
| ENSG00000167315 | ACAA2    | 1 | 0.340699816 |
| ENSG00000167323 | STIM1    | 1 | 1.033519553 |
| ENSG00000167359 | OR51I1   | 1 | 0.340699816 |
| ENSG00000167360 | OR51Q1   | 1 | 1.033519553 |
| ENSG00000167447 | SMG8     | 1 | 1.033519553 |
| ENSG00000167468 | GPX4     | 1 | 0.340699816 |
| ENSG00000167483 | FAM129C  | 1 | 0.613407821 |
| ENSG00000167491 | GATAD2A  | 1 | 0.340699816 |
| ENSG00000167522 | ANKRD11  | 1 | 1.034285714 |
| ENSG00000167524 | SGK494   | 1 | 1.033519553 |
| ENSG00000167536 | DHRS13   | 1 | 0.340699816 |
| ENSG00000167562 | ZNF701   | 1 | 1.033519553 |
| ENSG00000167566 | NCKAP5L  | 1 | 0.340699816 |
| ENSG00000167588 | GPD1     | 1 | 0.613407821 |
| ENSG00000167619 | TMEM145  | 1 | 0.340699816 |
| ENSG00000167641 | PPP1R14A | 1 | 1.033519553 |
| ENSG00000167695 | FAM57A   | 1 | 0.340699816 |
| ENSG00000167699 | GLOD4    | 1 | 0.340699816 |
| ENSG00000167702 | KIFC2    | 1 | 0.340699816 |
| ENSG00000167711 | SERPINF2 | 1 | 0.340699816 |
| ENSG00000167721 | TSR1     | 1 | 0.340699816 |
| ENSG00000167740 | CYB5D2   | 1 | 0.340699816 |
| ENSG00000167749 | KLK4     | 1 | 1.033519553 |

|                 |          |   |             |
|-----------------|----------|---|-------------|
| ENSG00000167754 | KLK5     | 1 | 0.340699816 |
| ENSG00000167755 | KLK6     | 1 | 0.613407821 |
| ENSG00000167766 | ZNF83    | 1 | 0.613407821 |
| ENSG00000167767 | KRT80    | 1 | 1.033519553 |
| ENSG00000167769 | ACER1    | 1 | 1.033519553 |
| ENSG00000167779 | IGFBP6   | 1 | 0.340699816 |
| ENSG00000167785 | ZNF558   | 1 | 1.033519553 |
| ENSG00000167840 | ZNF232   | 1 | 1.033519553 |
| ENSG00000167881 | SRP68    | 1 | 1.033519553 |
| ENSG00000167889 | MGAT5B   | 1 | 1.033519553 |
| ENSG00000167895 | TMC8     | 1 | 0.613407821 |
| ENSG00000167910 | CYP7A1   | 1 | 1.033519553 |
| ENSG00000167930 | ITFG3    | 1 | 0.613407821 |
| ENSG00000167965 | MLST8    | 1 | 1.033519553 |
| ENSG00000167968 | DNASE1L2 | 1 | 0.613407821 |
| ENSG00000167986 | DDB1     | 1 | 0.340699816 |
| ENSG00000168000 | BSCL2    | 1 | 0.340699816 |
| ENSG00000168010 | ATG16L2  | 1 | 0.613407821 |
| ENSG00000168032 | ENTPD3   | 1 | 0.340699816 |
| ENSG00000168036 | CTNNB1   | 1 | 0.340699816 |
| ENSG00000168070 | C11orf85 | 1 | 0.340699816 |
| ENSG00000168118 | RAB4A    | 1 | 1.033519553 |
| ENSG00000168137 | SETD5    | 1 | 1.033519553 |
| ENSG00000168148 | HIST3H3  | 1 | 0.340699816 |
| ENSG00000168152 | THAP9    | 1 | 0.340699816 |
| ENSG00000168158 | OR2C1    | 1 | 0.613407821 |
| ENSG00000168234 | TTC39C   | 1 | 1.033519553 |
| ENSG00000168259 | DNAJC7   | 1 | 0.340699816 |
| ENSG00000168264 | IRF2BP2  | 1 | 0.340699816 |
| ENSG00000168268 | NT5DC2   | 1 | 1.033519553 |
| ENSG00000168269 | FOXI1    | 1 | 1.033519553 |
| ENSG00000168282 | MGAT2    | 1 | 1.033519553 |
| ENSG00000168288 | MMADHC   | 1 | 0.340699816 |
| ENSG00000168314 | MOBP     | 1 | 0.340699816 |
| ENSG00000168329 | CX3CR1   | 1 | 1.033519553 |
| ENSG00000168356 | SCN11A   | 1 | 1.033519553 |
| ENSG00000168386 | FILIP1L  | 1 | 0.340699816 |
| ENSG00000168397 | ATG4B    | 1 | 1.033519553 |
| ENSG00000168418 | KCNG4    | 1 | 0.613407821 |
| ENSG00000168427 | KLHL30   | 1 | 0.613407821 |
| ENSG00000168438 | CDC40    | 1 | 0.340699816 |
| ENSG00000168439 | STIP1    | 1 | 0.340699816 |
| ENSG00000168491 | CCDC110  | 1 | 1.033519553 |
| ENSG00000168495 | POLR3D   | 1 | 1.033519553 |
| ENSG00000168496 | FEN1     | 1 | 0.340699816 |
| ENSG00000168502 | SOGA2    | 1 | 0.613407821 |
| ENSG00000168517 | HEXIM2   | 1 | 0.340699816 |

|                 |          |   |             |
|-----------------|----------|---|-------------|
| ENSG00000168546 | GFRA2    | 1 | 0.340699816 |
| ENSG00000168594 | ADAM29   | 1 | 1.033519553 |
| ENSG00000168634 | WFDC13   | 1 | 1.033519553 |
| ENSG00000168653 | NDUFS5   | 1 | 0.340699816 |
| ENSG00000168661 | ZNF30    | 1 | 1.033519553 |
| ENSG00000168724 | DNAJC21  | 1 | 1.033898305 |
| ENSG00000168743 | NPNT     | 1 | 0.340699816 |
| ENSG00000168754 | FAM178B  | 1 | 0.340699816 |
| ENSG00000168792 | ABHD15   | 1 | 0.613407821 |
| ENSG00000168803 | ADAL     | 1 | 1.033519553 |
| ENSG00000168806 | LCMT2    | 1 | 1.033898305 |
| ENSG00000168827 | GFM1     | 1 | 0.340699816 |
| ENSG00000168843 | FSTL5    | 1 | 0.340699816 |
| ENSG00000168883 | USP39    | 1 | 0.340699816 |
| ENSG00000168887 | C2orf68  | 1 | 1.033519553 |
| ENSG00000168904 | LRRC28   | 1 | 0.340699816 |
| ENSG00000168924 | LETM1    | 1 | 1.033898305 |
| ENSG00000168928 | CTRB2    | 1 | 1.033519553 |
| ENSG00000168930 | TRIM49   | 1 | 0.340699816 |
| ENSG00000168955 | TM4SF20  | 1 | 1.033898305 |
| ENSG00000168959 | GRM5     | 1 | 1.033519553 |
| ENSG00000168961 | LGALS9   | 1 | 1.033519553 |
| ENSG00000168995 | SIGLEC7  | 1 | 0.340699816 |
| ENSG00000169019 | COMMD8   | 1 | 0.340699816 |
| ENSG00000169057 | MECP2    | 1 | 1.033519553 |
| ENSG00000169118 | CSNK1G1  | 1 | 0.340699816 |
| ENSG00000169131 | ZNF354A  | 1 | 0.613407821 |
| ENSG00000169169 | CPT1C    | 1 | 0.613407821 |
| ENSG00000169174 | PCSK9    | 1 | 1.033898305 |
| ENSG00000169180 | XPO6     | 1 | 0.340699816 |
| ENSG00000169189 | NSMCE1   | 1 | 0.340699816 |
| ENSG00000169214 | OR6F1    | 1 | 0.340699816 |
| ENSG00000169221 | TBC1D10B | 1 | 0.613407821 |
| ENSG00000169241 | SLC50A1  | 1 | 0.340699816 |
| ENSG00000169282 | KCNAB1   | 1 | 1.033519553 |
| ENSG00000169340 | PDILT    | 1 | 1.033519553 |
| ENSG00000169371 | SNUPN    | 1 | 1.033898305 |
| ENSG00000169385 | RNASE2   | 1 | 0.340699816 |
| ENSG00000169418 | NPR1     | 1 | 0.730427764 |
| ENSG00000169507 | SLC38A11 | 1 | 1.033519553 |
| ENSG00000169515 | CCDC8    | 1 | 0.340699816 |
| ENSG00000169564 | PCBP1    | 1 | 1.033519553 |
| ENSG00000169641 | LUZP1    | 1 | 0.340699816 |
| ENSG00000169660 | HEXDC    | 1 | 1.033519553 |
| ENSG00000169676 | DRD5     | 1 | 1.033898305 |
| ENSG00000169682 | SPNS1    | 1 | 1.033519553 |
| ENSG00000169696 | ASPSCR1  | 1 | 0.340699816 |

|                 |          |   |             |
|-----------------|----------|---|-------------|
| ENSG00000169738 | DCXR     | 1 | 0.340699816 |
| ENSG00000169777 | TAS2R1   | 1 | 1.033519553 |
| ENSG00000169884 | WNT10B   | 1 | 0.340699816 |
| ENSG00000169903 | TM4SF4   | 1 | 0.340699816 |
| ENSG00000169914 | OTUD3    | 1 | 0.340699816 |
| ENSG00000169962 | TAS1R3   | 1 | 1.033519553 |
| ENSG00000169967 | MAP3K2   | 1 | 0.340699816 |
| ENSG00000169989 | TIGD4    | 1 | 0.613407821 |
| ENSG00000170011 | MYRIP    | 1 | 1.034682081 |
| ENSG00000170017 | ALCAM    | 1 | 0.340699816 |
| ENSG00000170037 | CNTROB   | 1 | 1.033898305 |
| ENSG00000170049 | KCNAB3   | 1 | 0.340699816 |
| ENSG00000170099 | SERPINA6 | 1 | 1.033519553 |
| ENSG00000170145 | SIK2     | 1 | 0.340699816 |
| ENSG00000170178 | HOXD12   | 1 | 0.340699816 |
| ENSG00000170190 | SLC16A5  | 1 | 0.340699816 |
| ENSG00000170234 | PWWP2A   | 1 | 1.033519553 |
| ENSG00000170236 | USP50    | 1 | 0.340699816 |
| ENSG00000170242 | USP47    | 1 | 1.033519553 |
| ENSG00000170262 | MRAP     | 1 | 0.340699816 |
| ENSG00000170275 | CRTAP    | 1 | 1.033519553 |
| ENSG00000170293 | CMTM8    | 1 | 0.340699816 |
| ENSG00000170322 | NFRKB    | 1 | 0.730427764 |
| ENSG00000170324 | FRMPD2   | 1 | 1.034682081 |
| ENSG00000170325 | PRDM10   | 1 | 1.033519553 |
| ENSG00000170367 | CST5     | 1 | 0.340699816 |
| ENSG00000170369 | CST2     | 1 | 0.340699816 |
| ENSG00000170382 | LRRN2    | 1 | 1.033519553 |
| ENSG00000170390 | DCLK2    | 1 | 0.340699816 |
| ENSG00000170396 | ZNF804A  | 1 | 0.340699816 |
| ENSG00000170423 | KRT78    | 1 | 1.033519553 |
| ENSG00000170426 | SDR9C7   | 1 | 0.340699816 |
| ENSG00000170430 | MGMT     | 1 | 0.340699816 |
| ENSG00000170456 | DENND5B  | 1 | 0.340699816 |
| ENSG00000170477 | KRT4     | 1 | 0.340699816 |
| ENSG00000170484 | KRT74    | 1 | 0.340699816 |
| ENSG00000170485 | NPAS2    | 1 | 0.340699816 |
| ENSG00000170502 | NUDT9    | 1 | 0.340699816 |
| ENSG00000170509 | HSD17B13 | 1 | 1.033519553 |
| ENSG00000170542 | SERPINB9 | 1 | 0.340699816 |
| ENSG00000170571 | EMB      | 1 | 1.033519553 |
| ENSG00000170579 | DLGAP1   | 1 | 0.340699816 |
| ENSG00000170608 | FOXA3    | 1 | 1.033519553 |
| ENSG00000170624 | SGCD     | 1 | 0.340699816 |
| ENSG00000170633 | RNF34    | 1 | 1.033519553 |
| ENSG00000170647 | TMEM133  | 1 | 0.340699816 |
| ENSG00000170683 | OR10A3   | 1 | 0.340699816 |

|                 |               |   |             |
|-----------------|---------------|---|-------------|
| ENSG00000170689 | HOXB9         | 1 | 0.340699816 |
| ENSG00000170748 | RBMXL2        | 1 | 1.033519553 |
| ENSG00000170759 | KIF5B         | 1 | 1.033898305 |
| ENSG00000170782 | OR10A4        | 1 | 0.340699816 |
| ENSG00000170820 | FSHR          | 1 | 1.033519553 |
| ENSG00000170836 | PPM1D         | 1 | 0.340699816 |
| ENSG00000170848 | PSG6          | 1 | 0.730427764 |
| ENSG00000170855 | TRIAP1        | 1 | 0.340699816 |
| ENSG00000170893 | TRH           | 1 | 0.340699816 |
| ENSG00000170917 | NUDT6         | 1 | 1.033519553 |
| ENSG00000170921 | TANC2         | 1 | 1.033519553 |
| ENSG00000170956 | CEACAM3       | 1 | 0.340699816 |
| ENSG00000170959 | DCDC1         | 1 | 1.033898305 |
| ENSG00000170967 | DDI1          | 1 | 1.033519553 |
| ENSG00000171014 | OR4D5         | 1 | 0.340699816 |
| ENSG00000171016 | PYGO1         | 1 | 1.033519553 |
| ENSG00000171051 | FPR1          | 1 | 1.033519553 |
| ENSG00000171056 | SOX7          | 1 | 1.033519553 |
| ENSG00000171060 | C8orf74       | 1 | 1.033898305 |
| ENSG00000171067 | C11orf24      | 1 | 1.033519553 |
| ENSG00000171102 | OBP2B         | 1 | 0.340699816 |
| ENSG00000171163 | ZNF692        | 1 | 0.340699816 |
| ENSG00000171189 | GRIK1         | 1 | 0.340699816 |
| ENSG00000171201 | SMR3B         | 1 | 0.340699816 |
| ENSG00000171202 | TMEM126A      | 1 | 0.340699816 |
| ENSG00000171204 | TMEM126B      | 1 | 0.340699816 |
| ENSG00000171234 | UGT2B7        | 1 | 0.340699816 |
| ENSG00000171241 | SHCBP1        | 1 | 1.033519553 |
| ENSG00000171262 | FAM98B        | 1 | 1.033519553 |
| ENSG00000171282 | RP11-1055B8.7 | 1 | 0.730427764 |
| ENSG00000171298 | GAA           | 1 | 1.033519553 |
| ENSG00000171302 | CANT1         | 1 | 0.340699816 |
| ENSG00000171316 | CHD7          | 1 | 1.033898305 |
| ENSG00000171346 | KRT15         | 1 | 1.033519553 |
| ENSG00000171456 | ASXL1         | 1 | 0.340699816 |
| ENSG00000171462 | DLK2          | 1 | 0.340699816 |
| ENSG00000171467 | ZNF318        | 1 | 1.033519553 |
| ENSG00000171469 | ZNF561        | 1 | 0.340699816 |
| ENSG00000171484 | OR1B1         | 1 | 1.033519553 |
| ENSG00000171495 | MROH2B        | 1 | 0.730427764 |
| ENSG00000171496 | OR1L8         | 1 | 1.033898305 |
| ENSG00000171497 | PPID          | 1 | 0.340699816 |
| ENSG00000171540 | OTP           | 1 | 0.340699816 |
| ENSG00000171557 | FGG           | 1 | 0.730427764 |
| ENSG00000171560 | FGA           | 1 | 1.033519553 |
| ENSG00000171596 | NMUR1         | 1 | 0.613407821 |
| ENSG00000171604 | CXXC5         | 1 | 0.340699816 |

|                 |          |   |             |
|-----------------|----------|---|-------------|
| ENSG00000171747 | LGALS4   | 1 | 0.340699816 |
| ENSG00000171763 | SPATA5L1 | 1 | 1.033898305 |
| ENSG00000171773 | NXNL1    | 1 | 1.033519553 |
| ENSG00000171792 | RHNO1    | 1 | 0.340699816 |
| ENSG00000171806 | METT18   | 1 | 0.340699816 |
| ENSG00000171819 | ANGPTL7  | 1 | 1.033519553 |
| ENSG00000171824 | EXOSC10  | 1 | 0.340699816 |
| ENSG00000171840 | NINJ2    | 1 | 0.340699816 |
| ENSG00000171931 | FBXW10   | 1 | 0.340699816 |
| ENSG00000171936 | OR10H3   | 1 | 1.033898305 |
| ENSG00000171940 | ZNF217   | 1 | 0.730427764 |
| ENSG00000171953 | ATPAF2   | 1 | 1.033519553 |
| ENSG00000171954 | CYP4F22  | 1 | 0.340699816 |
| ENSG00000171962 | LRRC48   | 1 | 1.033519553 |
| ENSG00000171988 | JMJD1C   | 1 | 0.865946919 |
| ENSG00000172005 | MAL      | 1 | 1.033519553 |
| ENSG00000172009 | THOP1    | 1 | 0.340699816 |
| ENSG00000172046 | USP19    | 1 | 0.730427764 |
| ENSG00000172057 | ORMDL3   | 1 | 0.340699816 |
| ENSG00000172061 | LRRC15   | 1 | 1.033519553 |
| ENSG00000172081 | MOB3A    | 1 | 0.340699816 |
| ENSG00000172139 | SLC9C1   | 1 | 1.033519553 |
| ENSG00000172146 | OR1A1    | 1 | 0.340699816 |
| ENSG00000172164 | SNTB1    | 1 | 1.033519553 |
| ENSG00000172167 | MTBP     | 1 | 0.613407821 |
| ENSG00000172260 | NEGR1    | 1 | 0.340699816 |
| ENSG00000172270 | BSG      | 1 | 0.340699816 |
| ENSG00000172320 | OR5A1    | 1 | 1.033519553 |
| ENSG00000172322 | CLEC12A  | 1 | 0.340699816 |
| ENSG00000172340 | SUCLG2   | 1 | 0.340699816 |
| ENSG00000172361 | CCDC11   | 1 | 1.033519553 |
| ENSG00000172362 | OR5B12   | 1 | 0.613407821 |
| ENSG00000172367 | PDZD3    | 1 | 0.340699816 |
| ENSG00000172403 | SYNPO2   | 1 | 0.340699816 |
| ENSG00000172404 | DNAJB7   | 1 | 1.033519553 |
| ENSG00000172456 | FGGY     | 1 | 0.613407821 |
| ENSG00000172459 | OR5AR1   | 1 | 0.340699816 |
| ENSG00000172464 | OR5AP2   | 1 | 0.340699816 |
| ENSG00000172478 | C2orf54  | 1 | 1.033519553 |
| ENSG00000172482 | AGXT     | 1 | 1.033898305 |
| ENSG00000172489 | OR5T3    | 1 | 0.340699816 |
| ENSG00000172497 | ACOT12   | 1 | 0.340699816 |
| ENSG00000172538 | FAM170B  | 1 | 0.340699816 |
| ENSG00000172543 | CTSW     | 1 | 0.340699816 |
| ENSG00000172554 | SNTG2    | 1 | 0.613407821 |
| ENSG00000172594 | SMPDL3A  | 1 | 1.033519553 |
| ENSG00000172638 | EFEMP2   | 1 | 0.613407821 |

|                 |          |   |             |
|-----------------|----------|---|-------------|
| ENSG00000172663 | TMEM134  | 1 | 0.340699816 |
| ENSG00000172716 | SLFN11   | 1 | 0.340699816 |
| ENSG00000172728 | FUT10    | 1 | 1.033519553 |
| ENSG00000172766 | NAA16    | 1 | 0.340699816 |
| ENSG00000172769 | OR5B3    | 1 | 1.033519553 |
| ENSG00000172772 | OR10W1   | 1 | 1.033898305 |
| ENSG00000172869 | DMXL1    | 1 | 1.034682081 |
| ENSG00000172878 | METAP1D  | 1 | 1.033898305 |
| ENSG00000173039 | RELA     | 1 | 0.340699816 |
| ENSG00000173080 | RXFP4    | 1 | 0.340699816 |
| ENSG00000173110 | HSPA6    | 1 | 0.340699816 |
| ENSG00000173157 | ADAMTS20 | 1 | 1.033519553 |
| ENSG00000173175 | ADCY5    | 1 | 0.340699816 |
| ENSG00000173193 | PARP14   | 1 | 0.730427764 |
| ENSG00000173209 | AHSA2    | 1 | 1.033519553 |
| ENSG00000173230 | GOLGB1   | 1 | 0.903487143 |
| ENSG00000173237 | C11orf86 | 1 | 0.340699816 |
| ENSG00000173239 | LIPM     | 1 | 0.340699816 |
| ENSG00000173250 | GPR151   | 1 | 1.033898305 |
| ENSG00000173253 | DMRT2    | 1 | 1.034285714 |
| ENSG00000173281 | PPP1R3B  | 1 | 0.340699816 |
| ENSG00000173320 | STOX2    | 1 | 1.033898305 |
| ENSG00000173402 | DAG1     | 1 | 0.340699816 |
| ENSG00000173406 | DAB1     | 1 | 1.033898305 |
| ENSG00000173409 | ARV1     | 1 | 0.613407821 |
| ENSG00000173442 | EHBP1L1  | 1 | 0.613407821 |
| ENSG00000173467 | AGR3     | 1 | 0.340699816 |
| ENSG00000173473 | SMARCC1  | 1 | 0.340699816 |
| ENSG00000173548 | SNX33    | 1 | 1.033519553 |
| ENSG00000173572 | NLRP13   | 1 | 1.033898305 |
| ENSG00000173575 | CHD2     | 1 | 0.730427764 |
| ENSG00000173585 | CCR9     | 1 | 0.613407821 |
| ENSG00000173614 | NMNAT1   | 1 | 0.340699816 |
| ENSG00000173699 | SPATA3   | 1 | 0.613407821 |
| ENSG00000173705 | SUSD5    | 1 | 1.033898305 |
| ENSG00000173706 | HEG1     | 1 | 1.033898305 |
| ENSG00000173728 | C1orf100 | 1 | 0.613407821 |
| ENSG00000173805 | HAP1     | 1 | 0.613407821 |
| ENSG00000173818 | ENDOV    | 1 | 1.033519553 |
| ENSG00000173838 | MARCH10  | 1 | 1.033519553 |
| ENSG00000173894 | CBX2     | 1 | 0.340699816 |
| ENSG00000173917 | HOXB2    | 1 | 1.033519553 |
| ENSG00000173918 | C1QTNF1  | 1 | 0.340699816 |
| ENSG00000173991 | TCAP     | 1 | 0.340699816 |
| ENSG00000174004 | NRROS    | 1 | 1.033519553 |
| ENSG00000174059 | CD34     | 1 | 0.340699816 |
| ENSG00000174132 | FAM174A  | 1 | 0.340699816 |

|                 |          |   |             |
|-----------------|----------|---|-------------|
| ENSG00000174145 | KIAA1239 | 1 | 0.613407821 |
| ENSG00000174177 | CTU2     | 1 | 0.613407821 |
| ENSG00000174233 | ADCY6    | 1 | 0.340699816 |
| ENSG00000174282 | ZBTB4    | 1 | 0.340699816 |
| ENSG00000174326 | SLC16A11 | 1 | 0.613407821 |
| ENSG00000174343 | CHRNA9   | 1 | 0.613407821 |
| ENSG00000174358 | SLC6A19  | 1 | 1.033519553 |
| ENSG00000174405 | LIG4     | 1 | 1.033898305 |
| ENSG00000174417 | TRHR     | 1 | 0.340699816 |
| ENSG00000174442 | ZWILCH   | 1 | 0.613407821 |
| ENSG00000174448 | STARD6   | 1 | 0.340699816 |
| ENSG00000174483 | BBS1     | 1 | 0.613407821 |
| ENSG00000174485 | DENND4A  | 1 | 1.033898305 |
| ENSG00000174500 | GCSAM    | 1 | 1.033519553 |
| ENSG00000174527 | MYO1H    | 1 | 1.033898305 |
| ENSG00000174529 | TMEM81   | 1 | 0.340699816 |
| ENSG00000174576 | NPAS4    | 1 | 0.340699816 |
| ENSG00000174579 | MSL2     | 1 | 0.730427764 |
| ENSG00000174600 | CMKLR1   | 1 | 0.340699816 |
| ENSG00000174652 | ZNF266   | 1 | 0.340699816 |
| ENSG00000174669 | SLC29A2  | 1 | 0.340699816 |
| ENSG00000174705 | SH3PXD2B | 1 | 1.033519553 |
| ENSG00000174720 | LARP7    | 1 | 1.034285714 |
| ENSG00000174738 | NR1D2    | 1 | 0.340699816 |
| ENSG00000174780 | SRP72    | 1 | 0.340699816 |
| ENSG00000174788 | PCP2     | 1 | 1.033519553 |
| ENSG00000174791 | RIN1     | 1 | 1.033519553 |
| ENSG00000174799 | CEP135   | 1 | 0.340699816 |
| ENSG00000174807 | CD248    | 1 | 1.033519553 |
| ENSG00000174839 | DENND6A  | 1 | 1.033519553 |
| ENSG00000174899 | C3orf55  | 1 | 0.340699816 |
| ENSG00000174942 | OR5R1    | 1 | 1.033519553 |
| ENSG00000174945 | AMZ1     | 1 | 0.340699816 |
| ENSG00000174970 | OR10AG1  | 1 | 0.340699816 |
| ENSG00000174996 | KLC2     | 1 | 0.340699816 |
| ENSG00000175029 | CTBP2    | 1 | 0.613407821 |
| ENSG00000175048 | ZDHC14   | 1 | 1.033519553 |
| ENSG00000175097 | RAG2     | 1 | 0.613407821 |
| ENSG00000175105 | ZNF654   | 1 | 1.033519553 |
| ENSG00000175143 | OR2T1    | 1 | 1.033519553 |
| ENSG00000175175 | PPM1E    | 1 | 0.340699816 |
| ENSG00000175183 | CSR2     | 1 | 0.340699816 |
| ENSG00000175216 | CKAP5    | 1 | 0.340699816 |
| ENSG00000175279 | APITD1   | 1 | 0.340699816 |
| ENSG00000175311 | ANKS4B   | 1 | 0.613407821 |
| ENSG00000175318 | GRAMD2   | 1 | 0.340699816 |
| ENSG00000175322 | ZNF519   | 1 | 0.613407821 |

|                 |            |   |             |
|-----------------|------------|---|-------------|
| ENSG00000175329 | ISX        | 1 | 1.033519553 |
| ENSG00000175352 | NRIP3      | 1 | 1.033519553 |
| ENSG00000175390 | EIF3F      | 1 | 0.340699816 |
| ENSG00000175455 | CCDC14     | 1 | 0.340699816 |
| ENSG00000175467 | SART1      | 1 | 0.340699816 |
| ENSG00000175471 | MCTP1      | 1 | 1.033898305 |
| ENSG00000175538 | KCNE3      | 1 | 1.033519553 |
| ENSG00000175582 | RAB6A      | 1 | 0.340699816 |
| ENSG00000175591 | P2RY2      | 1 | 0.340699816 |
| ENSG00000175606 | TMEM70     | 1 | 0.340699816 |
| ENSG00000175662 | TOM1L2     | 1 | 0.340699816 |
| ENSG00000175691 | ZNF77      | 1 | 0.613407821 |
| ENSG00000175718 | RBMXL3     | 1 | 0.340699816 |
| ENSG00000175764 | TTLL11     | 1 | 1.033519553 |
| ENSG00000175793 | SFN        | 1 | 0.340699816 |
| ENSG00000175806 | MSRA       | 1 | 0.340699816 |
| ENSG00000175899 | A2M        | 1 | 1.033519553 |
| ENSG00000175920 | DOK7       | 1 | 1.033519553 |
| ENSG00000175928 | LRRN1      | 1 | 1.033519553 |
| ENSG00000175931 | UBE2O      | 1 | 1.033898305 |
| ENSG00000175984 | DENND2C    | 1 | 1.034285714 |
| ENSG00000175985 | PLEKHD1    | 1 | 1.033519553 |
| ENSG00000176029 | C11orf16   | 1 | 1.033519553 |
| ENSG00000176034 | CHDC2      | 1 | 1.033519553 |
| ENSG00000176058 | TPRN       | 1 | 1.033519553 |
| ENSG00000176083 | ZNF683     | 1 | 0.340699816 |
| ENSG00000176087 | SLC35A4    | 1 | 0.340699816 |
| ENSG00000176105 | YES1       | 1 | 1.033898305 |
| ENSG00000176136 | MC5R       | 1 | 0.340699816 |
| ENSG00000176148 | TCP11L1    | 1 | 0.613407821 |
| ENSG00000176194 | CIDEA      | 1 | 1.033898305 |
| ENSG00000176198 | OR11H4     | 1 | 0.613407821 |
| ENSG00000176222 | ZNF404     | 1 | 0.613407821 |
| ENSG00000176230 | OR4K17     | 1 | 1.033519553 |
| ENSG00000176231 | OR10H4     | 1 | 0.340699816 |
| ENSG00000176244 | ACBD7      | 1 | 1.033519553 |
| ENSG00000176281 | OR4K5      | 1 | 0.340699816 |
| ENSG00000176299 | OR4M1      | 1 | 1.033519553 |
| ENSG00000176401 | EID2B      | 1 | 0.340699816 |
| ENSG00000176410 | DNAJC30    | 1 | 0.340699816 |
| ENSG00000176438 | SYNE3      | 1 | 0.613407821 |
| ENSG00000176473 | WDR25      | 1 | 1.033519553 |
| ENSG00000176515 | AL033381.1 | 1 | 0.613407821 |
| ENSG00000176547 | OR4C3      | 1 | 0.340699816 |
| ENSG00000176563 | CNTD1      | 1 | 1.033519553 |
| ENSG00000176619 | LMNB2      | 1 | 1.033519553 |
| ENSG00000176635 | HORMAD2    | 1 | 1.033898305 |

|                 |            |   |             |
|-----------------|------------|---|-------------|
| ENSG00000176641 | RNF152     | 1 | 0.340699816 |
| ENSG00000176697 | BDNF       | 1 | 0.613407821 |
| ENSG00000176723 | ZNF843     | 1 | 0.340699816 |
| ENSG00000176732 | PFN4       | 1 | 0.340699816 |
| ENSG00000176742 | OR51V1     | 1 | 0.613407821 |
| ENSG00000176788 | BASP1      | 1 | 1.033519553 |
| ENSG00000176798 | OR51L1     | 1 | 1.033519553 |
| ENSG00000176845 | METRNL     | 1 | 0.340699816 |
| ENSG00000176871 | WSB2       | 1 | 1.033519553 |
| ENSG00000176879 | OR51G1     | 1 | 1.033519553 |
| ENSG00000176895 | OR51A7     | 1 | 0.613407821 |
| ENSG00000176927 | EFCAB5     | 1 | 0.730427764 |
| ENSG00000176945 | MUC20      | 1 | 0.340699816 |
| ENSG00000176979 | TRIM60     | 1 | 0.613407821 |
| ENSG00000176984 | AP000679.2 | 1 | 1.033519553 |
| ENSG00000176994 | SMCR8      | 1 | 0.613407821 |
| ENSG00000177000 | MTHFR      | 1 | 0.340699816 |
| ENSG00000177042 | TMEM80     | 1 | 1.033519553 |
| ENSG00000177054 | ZDHHC13    | 1 | 0.340699816 |
| ENSG00000177103 | DSCAML1    | 1 | 1.033519553 |
| ENSG00000177119 | ANO6       | 1 | 0.340699816 |
| ENSG00000177143 | CETN1      | 1 | 1.033519553 |
| ENSG00000177192 | PUS1       | 1 | 0.340699816 |
| ENSG00000177303 | CASKIN2    | 1 | 0.340699816 |
| ENSG00000177354 | C10orf71   | 1 | 0.865946919 |
| ENSG00000177380 | PPFIA3     | 1 | 1.033519553 |
| ENSG00000177425 | PAWR       | 1 | 1.033519553 |
| ENSG00000177462 | OR2T8      | 1 | 1.033519553 |
| ENSG00000177463 | NR2C2      | 1 | 0.340699816 |
| ENSG00000177483 | RBM44      | 1 | 1.033519553 |
| ENSG00000177511 | ST8SIA3    | 1 | 0.340699816 |
| ENSG00000177535 | OR2B11     | 1 | 0.340699816 |
| ENSG00000177570 | SAMD12     | 1 | 0.730427764 |
| ENSG00000177595 | PIDD       | 1 | 1.033898305 |
| ENSG00000177602 | GSG2       | 1 | 0.613407821 |
| ENSG00000177614 | PGBD5      | 1 | 1.033519553 |
| ENSG00000177628 | GBA        | 1 | 0.340699816 |
| ENSG00000177646 | ACAD9      | 1 | 1.033519553 |
| ENSG00000177673 | C2orf57    | 1 | 0.340699816 |
| ENSG00000177694 | NAALADL2   | 1 | 0.340699816 |
| ENSG00000177721 | ANXA2R     | 1 | 1.033519553 |
| ENSG00000177807 | KCNJ10     | 1 | 1.033519553 |
| ENSG00000177842 | ZNF620     | 1 | 0.340699816 |
| ENSG00000177873 | ZNF619     | 1 | 1.034285714 |
| ENSG00000178015 | GPR150     | 1 | 0.340699816 |
| ENSG00000178026 | FAM211B    | 1 | 1.033898305 |
| ENSG00000178078 | STAP2      | 1 | 0.340699816 |

|                 |            |   |             |
|-----------------|------------|---|-------------|
| ENSG00000178084 | HTR3C      | 1 | 0.613407821 |
| ENSG00000178149 | DALRD3     | 1 | 1.033519553 |
| ENSG00000178150 | ZNF114     | 1 | 0.340699816 |
| ENSG00000178217 | SH2D4B     | 1 | 1.033519553 |
| ENSG00000178252 | WDR6       | 1 | 1.033519553 |
| ENSG00000178287 | SPAG11A    | 1 | 1.033519553 |
| ENSG00000178307 | TMEM11     | 1 | 0.340699816 |
| ENSG00000178372 | CALML5     | 1 | 1.033519553 |
| ENSG00000178386 | ZNF223     | 1 | 1.033519553 |
| ENSG00000178462 | TUBAL3     | 1 | 1.033519553 |
| ENSG00000178522 | AMBN       | 1 | 1.033519553 |
| ENSG00000178537 | SLC25A20   | 1 | 0.340699816 |
| ENSG00000178591 | DEFB125    | 1 | 0.613407821 |
| ENSG00000178597 | PSAPL1     | 1 | 0.730427764 |
| ENSG00000178602 | OTOS       | 1 | 0.340699816 |
| ENSG00000178607 | ERN1       | 1 | 0.340699816 |
| ENSG00000178645 | C10orf53   | 1 | 0.340699816 |
| ENSG00000178691 | SUZ12      | 1 | 1.033519553 |
| ENSG00000178734 | C13orf45   | 1 | 0.340699816 |
| ENSG00000178795 | GDPD4      | 1 | 0.613407821 |
| ENSG00000178796 | RIAD1      | 1 | 0.340699816 |
| ENSG00000178878 | APOLD1     | 1 | 0.340699816 |
| ENSG00000178882 | FAM101A    | 1 | 0.340699816 |
| ENSG00000178913 | TAF7       | 1 | 1.033519553 |
| ENSG00000178950 | GAK        | 1 | 1.033898305 |
| ENSG00000178951 | ZBTB7A     | 1 | 1.033519553 |
| ENSG00000178965 | C1orf173   | 1 | 0.795555556 |
| ENSG00000178999 | AURKB      | 1 | 0.340699816 |
| ENSG00000179023 | KLHDC7A    | 1 | 0.340699816 |
| ENSG00000179055 | OR13D1     | 1 | 0.340699816 |
| ENSG00000179058 | C9orf50    | 1 | 0.340699816 |
| ENSG00000179059 | ZFP42      | 1 | 0.613407821 |
| ENSG00000179104 | TMTC2      | 1 | 1.033519553 |
| ENSG00000179115 | FARSA      | 1 | 0.340699816 |
| ENSG00000179119 | SPTY2D1    | 1 | 0.730427764 |
| ENSG00000179133 | C10orf67   | 1 | 0.340699816 |
| ENSG00000179148 | ALOXE3     | 1 | 1.033898305 |
| ENSG00000179241 | LDLRAD3    | 1 | 0.613407821 |
| ENSG00000179256 | SMCO3      | 1 | 0.340699816 |
| ENSG00000179271 | GADD45GIP1 | 1 | 1.033519553 |
| ENSG00000179299 | NSUN7      | 1 | 0.340699816 |
| ENSG00000179300 | ZCCHC5     | 1 | 1.033519553 |
| ENSG00000179314 | WSCD1      | 1 | 1.034285714 |
| ENSG00000179348 | GATA2      | 1 | 0.340699816 |
| ENSG00000179397 | C1orf101   | 1 | 0.730427764 |
| ENSG00000179403 | VWA1       | 1 | 0.340699816 |
| ENSG00000179431 | FJX1       | 1 | 0.340699816 |

|                 |          |   |             |
|-----------------|----------|---|-------------|
| ENSG00000179454 | KLHL28   | 1 | 1.033519553 |
| ENSG00000179562 | GCC1     | 1 | 0.340699816 |
| ENSG00000179583 | CIITA    | 1 | 0.613407821 |
| ENSG00000179593 | ALOX15B  | 1 | 1.033519553 |
| ENSG00000179636 | TPPP2    | 1 | 0.340699816 |
| ENSG00000179695 | OR6C2    | 1 | 0.340699816 |
| ENSG00000179761 | PIPOX    | 1 | 0.340699816 |
| ENSG00000179772 | FOX51    | 1 | 1.033519553 |
| ENSG00000179776 | CDH5     | 1 | 1.033519553 |
| ENSG00000179855 | GIPC3    | 1 | 0.340699816 |
| ENSG00000179873 | NLRP11   | 1 | 0.340699816 |
| ENSG00000179909 | ZNF154   | 1 | 1.033519553 |
| ENSG00000179912 | R3HDM2   | 1 | 0.340699816 |
| ENSG00000179914 | ITLN1    | 1 | 1.033519553 |
| ENSG00000179915 | NRXN1    | 1 | 1.033519553 |
| ENSG00000179930 | ZNF648   | 1 | 1.033519553 |
| ENSG00000179934 | CCR8     | 1 | 0.340699816 |
| ENSG00000179954 | SSC5D    | 1 | 1.034285714 |
| ENSG00000179981 | TSHZ1    | 1 | 0.613407821 |
| ENSG00000180008 | SOCS4    | 1 | 1.033519553 |
| ENSG00000180071 | ANKRD18A | 1 | 0.613407821 |
| ENSG00000180089 | TMEM86B  | 1 | 0.613407821 |
| ENSG00000180096 | SEPT1    | 1 | 1.033519553 |
| ENSG00000180205 | WFDC9    | 1 | 0.340699816 |
| ENSG00000180251 | SLC9A4   | 1 | 1.033519553 |
| ENSG00000180269 | GPR139   | 1 | 0.613407821 |
| ENSG00000180316 | PNPLA1   | 1 | 1.033519553 |
| ENSG00000180318 | ALX1     | 1 | 1.033898305 |
| ENSG00000180346 | TIGD2    | 1 | 0.613407821 |
| ENSG00000180357 | ZNF609   | 1 | 1.033519553 |
| ENSG00000180423 | HARBI1   | 1 | 0.340699816 |
| ENSG00000180483 | DEFB119  | 1 | 0.340699816 |
| ENSG00000180525 | PRR26    | 1 | 0.340699816 |
| ENSG00000180530 | NRIP1    | 1 | 0.340699816 |
| ENSG00000180539 | C9orf139 | 1 | 1.033519553 |
| ENSG00000180543 | TSPYL5   | 1 | 0.613407821 |
| ENSG00000180644 | PRF1     | 1 | 0.340699816 |
| ENSG00000180730 | SHISA2   | 1 | 0.340699816 |
| ENSG00000180745 | CLRN3    | 1 | 0.340699816 |
| ENSG00000180772 | AGTR2    | 1 | 0.340699816 |
| ENSG00000180777 | ANKRD30B | 1 | 1.033519553 |
| ENSG00000180801 | ARSJ     | 1 | 1.033519553 |
| ENSG00000180815 | MAP3K15  | 1 | 1.033519553 |
| ENSG00000180818 | HOXC10   | 1 | 0.613407821 |
| ENSG00000180822 | PSMG4    | 1 | 1.033898305 |
| ENSG00000180878 | C11orf42 | 1 | 0.340699816 |
| ENSG00000180884 | ZNF792   | 1 | 1.033519553 |

|                 |            |   |             |
|-----------------|------------|---|-------------|
| ENSG00000180900 | SCRIB      | 1 | 1.034285714 |
| ENSG00000180902 | D2HGDH     | 1 | 0.340699816 |
| ENSG00000181019 | NQO1       | 1 | 0.340699816 |
| ENSG00000181026 | AEN        | 1 | 1.033519553 |
| ENSG00000181031 | RPH3AL     | 1 | 1.033519553 |
| ENSG00000181036 | FCRL6      | 1 | 0.613407821 |
| ENSG00000181045 | SLC26A11   | 1 | 0.837099317 |
| ENSG00000181072 | CHRM2      | 1 | 1.033519553 |
| ENSG00000181090 | EHMT1      | 1 | 0.340699816 |
| ENSG00000181240 | SLC25A41   | 1 | 1.033519553 |
| ENSG00000181264 | TMEM136    | 1 | 0.340699816 |
| ENSG00000181284 | TMEM102    | 1 | 0.340699816 |
| ENSG00000181333 | HEPHL1     | 1 | 0.613407821 |
| ENSG00000181350 | FAM211A    | 1 | 0.340699816 |
| ENSG00000181418 | DDN        | 1 | 0.340699816 |
| ENSG00000181555 | SETD2      | 1 | 1.033519553 |
| ENSG00000181585 | TMIE       | 1 | 0.340699816 |
| ENSG00000181634 | TNFSF15    | 1 | 1.033519553 |
| ENSG00000181652 | ATG9B      | 1 | 0.340699816 |
| ENSG00000181666 | HKR1       | 1 | 0.340699816 |
| ENSG00000181722 | ZBTB20     | 1 | 0.340699816 |
| ENSG00000181751 | C5orf30    | 1 | 0.340699816 |
| ENSG00000181754 | AMIGO1     | 1 | 0.340699816 |
| ENSG00000181773 | GPR3       | 1 | 0.340699816 |
| ENSG00000181786 | ACTL9      | 1 | 0.340699816 |
| ENSG00000181804 | SLC9A9     | 1 | 1.033519553 |
| ENSG00000181856 | SLC2A4     | 1 | 1.033519553 |
| ENSG00000181867 | FTMT       | 1 | 1.033519553 |
| ENSG00000181908 | AP003774.4 | 1 | 1.033898305 |
| ENSG00000181924 | COA4       | 1 | 0.340699816 |
| ENSG00000181939 | OR4C15     | 1 | 0.613407821 |
| ENSG00000181963 | OR52K2     | 1 | 1.033519553 |
| ENSG00000181982 | CCDC149    | 1 | 1.033898305 |
| ENSG00000181991 | MRPS11     | 1 | 0.340699816 |
| ENSG00000182103 | FAM181B    | 1 | 1.033519553 |
| ENSG00000182156 | ENPP7      | 1 | 1.033898305 |
| ENSG00000182168 | UNC5C      | 1 | 1.033898305 |
| ENSG00000182173 | TSEN54     | 1 | 0.613407821 |
| ENSG00000182185 | RAD51B     | 1 | 0.340699816 |
| ENSG00000182224 | CYB5D1     | 1 | 1.033519553 |
| ENSG00000182308 | DCAF4L1    | 1 | 1.033519553 |
| ENSG00000182318 | ZSCAN22    | 1 | 0.613407821 |
| ENSG00000182329 | AC079354.1 | 1 | 1.033519553 |
| ENSG00000182389 | CACNB4     | 1 | 0.340699816 |
| ENSG00000182459 | TEX19      | 1 | 1.033519553 |
| ENSG00000182473 | EXOC7      | 1 | 1.033898305 |
| ENSG00000182481 | KPNA2      | 1 | 1.033519553 |

|                 |           |   |             |
|-----------------|-----------|---|-------------|
| ENSG00000182511 | FES       | 1 | 1.033898305 |
| ENSG00000182551 | ADI1      | 1 | 0.340699816 |
| ENSG00000182670 | TTC3      | 1 | 0.613407821 |
| ENSG00000182685 | BRICD5    | 1 | 0.340699816 |
| ENSG00000182704 | TSKU      | 1 | 1.033519553 |
| ENSG00000182791 | CCDC87    | 1 | 1.033519553 |
| ENSG00000182793 | GSTA5     | 1 | 1.033519553 |
| ENSG00000182795 | C1orf116  | 1 | 1.033519553 |
| ENSG00000182809 | CRIP2     | 1 | 0.340699816 |
| ENSG00000182816 | KRTAP13-2 | 1 | 0.340699816 |
| ENSG00000182851 | GPIHBP1   | 1 | 0.340699816 |
| ENSG00000182853 | VMO1      | 1 | 0.340699816 |
| ENSG00000182885 | GPR97     | 1 | 1.033898305 |
| ENSG00000182898 | TCHHL1    | 1 | 0.340699816 |
| ENSG00000182923 | CEP63     | 1 | 0.340699816 |
| ENSG00000182934 | SRPR      | 1 | 0.340699816 |
| ENSG00000182952 | HMGNA4    | 1 | 0.340699816 |
| ENSG00000182985 | CADM1     | 1 | 0.340699816 |
| ENSG00000183023 | SLC8A1    | 1 | 1.033519553 |
| ENSG00000183024 | OR1G1     | 1 | 0.340699816 |
| ENSG00000183032 | SLC25A21  | 1 | 0.340699816 |
| ENSG00000183048 | SLC25A10  | 1 | 1.033519553 |
| ENSG00000183067 | IGSF5     | 1 | 1.033519553 |
| ENSG00000183077 | AFMID     | 1 | 1.033898305 |
| ENSG00000183087 | GAS6      | 1 | 1.033898305 |
| ENSG00000183111 | ARHGEF37  | 1 | 1.033519553 |
| ENSG00000183172 | SMDT1     | 1 | 0.340699816 |
| ENSG00000183186 | C2CD4C    | 1 | 0.340699816 |
| ENSG00000183273 | CCDC60    | 1 | 1.033519553 |
| ENSG00000183283 | DAZAP2    | 1 | 0.340699816 |
| ENSG00000183287 | CCBE1     | 1 | 1.033519553 |
| ENSG00000183303 | OR5P2     | 1 | 1.033519553 |
| ENSG00000183307 | CECR6     | 1 | 0.340699816 |
| ENSG00000183309 | ZNF623    | 1 | 1.033519553 |
| ENSG00000183317 | EPHA10    | 1 | 1.033898305 |
| ENSG00000183318 | SPDYE4    | 1 | 0.340699816 |
| ENSG00000183340 | JRKL      | 1 | 0.340699816 |
| ENSG00000183378 | OVCH2     | 1 | 0.795555556 |
| ENSG00000183473 | SSTR3     | 1 | 0.613407821 |
| ENSG00000183486 | MX2       | 1 | 0.613407821 |
| ENSG00000183496 | MEX3B     | 1 | 0.340699816 |
| ENSG00000183508 | FAM46C    | 1 | 1.033898305 |
| ENSG00000183527 | PSMG1     | 1 | 0.340699816 |
| ENSG00000183530 | PRR14L    | 1 | 0.340699816 |
| ENSG00000183549 | ACSM5     | 1 | 1.034682081 |
| ENSG00000183559 | C10orf120 | 1 | 1.033519553 |
| ENSG00000183566 | BPIFA4P   | 1 | 0.340699816 |

|                 |          |   |             |
|-----------------|----------|---|-------------|
| ENSG00000183576 | SETD3    | 1 | 1.033519553 |
| ENSG00000183643 | C15orf32 | 1 | 0.340699816 |
| ENSG00000183644 | C11orf88 | 1 | 0.340699816 |
| ENSG00000183655 | KLHL25   | 1 | 1.033519553 |
| ENSG00000183696 | UPP1     | 1 | 1.033519553 |
| ENSG00000183723 | CMTM4    | 1 | 0.340699816 |
| ENSG00000183729 | NPBWR1   | 1 | 0.340699816 |
| ENSG00000183760 | PAPL     | 1 | 1.033519553 |
| ENSG00000183765 | CHEK2    | 1 | 0.340699816 |
| ENSG00000183775 | KCTD16   | 1 | 1.033519553 |
| ENSG00000183798 | EMILIN3  | 1 | 0.613407821 |
| ENSG00000183814 | LIN9     | 1 | 0.340699816 |
| ENSG00000183826 | BTBD9    | 1 | 0.340699816 |
| ENSG00000183840 | GPR39    | 1 | 1.033519553 |
| ENSG00000183873 | SCN5A    | 1 | 1.034285714 |
| ENSG00000183888 | C1orf64  | 1 | 1.033519553 |
| ENSG00000184140 | OR4F6    | 1 | 1.033519553 |
| ENSG00000184155 | OR10J5   | 1 | 0.730427764 |
| ENSG00000184163 | FAM132A  | 1 | 0.340699816 |
| ENSG00000184164 | CRELD2   | 1 | 0.340699816 |
| ENSG00000184178 | SCFD2    | 1 | 0.340699816 |
| ENSG00000184209 | SNRNP35  | 1 | 1.033519553 |
| ENSG00000184220 | CMSS1    | 1 | 1.033519553 |
| ENSG00000184281 | TSSC4    | 1 | 0.340699816 |
| ENSG00000184304 | PRKD1    | 1 | 0.340699816 |
| ENSG00000184307 | ZDHHC23  | 1 | 0.340699816 |
| ENSG00000184313 | MROH7    | 1 | 1.034285714 |
| ENSG00000184321 | OR51J1   | 1 | 1.033519553 |
| ENSG00000184343 | SRPK3    | 1 | 0.340699816 |
| ENSG00000184345 | IQCF2    | 1 | 1.033519553 |
| ENSG00000184347 | SLIT3    | 1 | 1.033519553 |
| ENSG00000184371 | CSF1     | 1 | 1.033519553 |
| ENSG00000184381 | PLA2G6   | 1 | 0.340699816 |
| ENSG00000184436 | THAP7    | 1 | 1.033519553 |
| ENSG00000184445 | KNTC1    | 1 | 1.033519553 |
| ENSG00000184451 | CCR10    | 1 | 0.340699816 |
| ENSG00000184465 | WDR27    | 1 | 0.887179487 |
| ENSG00000184497 | TMEM255B | 1 | 0.340699816 |
| ENSG00000184502 | GAST     | 1 | 1.033519553 |
| ENSG00000184613 | NELL2    | 1 | 1.033519553 |
| ENSG00000184619 | KRBA2    | 1 | 0.340699816 |
| ENSG00000184640 | SEPT9    | 1 | 1.033519553 |
| ENSG00000184716 | SERINC4  | 1 | 0.340699816 |
| ENSG00000184735 | DDX53    | 1 | 0.340699816 |
| ENSG00000184792 | OSBP2    | 1 | 1.033519553 |
| ENSG00000184811 | TUSC5    | 1 | 0.340699816 |
| ENSG00000184838 | PRR16    | 1 | 0.613407821 |

|                 |          |   |             |
|-----------------|----------|---|-------------|
| ENSG00000184845 | DRD1     | 1 | 0.340699816 |
| ENSG00000184898 | RBM43    | 1 | 0.340699816 |
| ENSG00000184922 | FMNL1    | 1 | 1.033519553 |
| ENSG00000184925 | LCN12    | 1 | 1.033519553 |
| ENSG00000184933 | OR6A2    | 1 | 1.033898305 |
| ENSG00000184949 | FAM227A  | 1 | 0.340699816 |
| ENSG00000184967 | NOC4L    | 1 | 0.340699816 |
| ENSG00000184983 | NDUFA6   | 1 | 1.033519553 |
| ENSG00000184984 | CHRM5    | 1 | 1.033519553 |
| ENSG00000184985 | SORCS2   | 1 | 1.033898305 |
| ENSG00000184990 | SIVA1    | 1 | 0.613407821 |
| ENSG00000185000 | DGAT1    | 1 | 0.613407821 |
| ENSG00000185008 | ROBO2    | 1 | 0.613407821 |
| ENSG00000185013 | NT5C1B   | 1 | 1.033898305 |
| ENSG00000185033 | SEMA4B   | 1 | 1.034285714 |
| ENSG00000185038 | MROH2A   | 1 | 0.730427764 |
| ENSG00000185046 | ANKS1B   | 1 | 0.340699816 |
| ENSG00000185115 | NDNL2    | 1 | 1.033519553 |
| ENSG00000185158 | LRRC37B  | 1 | 0.340699816 |
| ENSG00000185219 | ZNF445   | 1 | 0.795555556 |
| ENSG00000185231 | MC2R     | 1 | 0.340699816 |
| ENSG00000185247 | MAGEA11  | 1 | 1.033519553 |
| ENSG00000185274 | WBSCR17  | 1 | 0.340699816 |
| ENSG00000185303 | SFTPA2   | 1 | 0.340699816 |
| ENSG00000185313 | SCN10A   | 1 | 1.034682081 |
| ENSG00000185324 | CDK10    | 1 | 1.033519553 |
| ENSG00000185340 | GAS2L1   | 1 | 0.340699816 |
| ENSG00000185344 | ATP6V0A2 | 1 | 0.340699816 |
| ENSG00000185347 | C14orf80 | 1 | 1.033519553 |
| ENSG00000185372 | OR2V1    | 1 | 0.340699816 |
| ENSG00000185418 | TARSL2   | 1 | 0.340699816 |
| ENSG00000185420 | SMYD3    | 1 | 0.340699816 |
| ENSG00000185432 | METTL7A  | 1 | 0.340699816 |
| ENSG00000185477 | GPRIN3   | 1 | 0.613407821 |
| ENSG00000185513 | L3MBTL1  | 1 | 0.613407821 |
| ENSG00000185615 | PDIA2    | 1 | 1.033898305 |
| ENSG00000185674 | LYG2     | 1 | 0.340699816 |
| ENSG00000185697 | MYBL1    | 1 | 0.340699816 |
| ENSG00000185737 | NRG3     | 1 | 0.340699816 |
| ENSG00000185742 | C11orf87 | 1 | 0.340699816 |
| ENSG00000185761 | ADAMTSL5 | 1 | 0.340699816 |
| ENSG00000185792 | NLRP9    | 1 | 0.340699816 |
| ENSG00000185813 | PCYT2    | 1 | 1.033519553 |
| ENSG00000185821 | OR6C76   | 1 | 1.033519553 |
| ENSG00000185860 | C1orf110 | 1 | 0.613407821 |
| ENSG00000185896 | LAMP1    | 1 | 0.340699816 |
| ENSG00000185920 | PTCH1    | 1 | 0.613407821 |

|                 |           |   |             |
|-----------------|-----------|---|-------------|
| ENSG00000185947 | ZNF267    | 1 | 0.613407821 |
| ENSG00000185950 | IRS2      | 1 | 1.033519553 |
| ENSG00000185963 | BICD2     | 1 | 0.340699816 |
| ENSG00000186007 | LEMD1     | 1 | 1.033519553 |
| ENSG00000186026 | ZNF284    | 1 | 0.340699816 |
| ENSG00000186038 | HTR3E     | 1 | 0.340699816 |
| ENSG00000186094 | AGBL4     | 1 | 1.033519553 |
| ENSG00000186103 | ARGFX     | 1 | 0.340699816 |
| ENSG00000186111 | PIP5K1C   | 1 | 0.340699816 |
| ENSG00000186141 | POLR3C    | 1 | 1.033898305 |
| ENSG00000186153 | WWOX      | 1 | 0.613407821 |
| ENSG00000186185 | KIF18B    | 1 | 0.340699816 |
| ENSG00000186191 | BPIFB4    | 1 | 0.340699816 |
| ENSG00000186204 | CYP4F12   | 1 | 1.033898305 |
| ENSG00000186260 | MKL2      | 1 | 1.033519553 |
| ENSG00000186281 | GPAT2     | 1 | 1.033519553 |
| ENSG00000186297 | GABRA5    | 1 | 0.340699816 |
| ENSG00000186335 | SLC36A2   | 1 | 1.033898305 |
| ENSG00000186350 | RXRA      | 1 | 0.340699816 |
| ENSG00000186409 | CCDC30    | 1 | 0.795555556 |
| ENSG00000186439 | TRDN      | 1 | 0.730427764 |
| ENSG00000186448 | ZNF197    | 1 | 0.613407821 |
| ENSG00000186472 | PCLO      | 1 | 1.035087719 |
| ENSG00000186501 | TMEM222   | 1 | 0.340699816 |
| ENSG00000186509 | OR9Q1     | 1 | 0.613407821 |
| ENSG00000186517 | ARHGAP30  | 1 | 1.033519553 |
| ENSG00000186566 | GPATCH8   | 1 | 1.033519553 |
| ENSG00000186577 | C6orf1    | 1 | 0.340699816 |
| ENSG00000186628 | FSD2      | 1 | 1.033519553 |
| ENSG00000186666 | BCDIN3D   | 1 | 1.033898305 |
| ENSG00000186684 | CYP27C1   | 1 | 1.033519553 |
| ENSG00000186777 | ZNF732    | 1 | 0.613407821 |
| ENSG00000186814 | ZSCAN30   | 1 | 1.034285714 |
| ENSG00000186818 | LILRB4    | 1 | 0.340699816 |
| ENSG00000186862 | PDZD7     | 1 | 1.033519553 |
| ENSG00000186891 | TNFRSF18  | 1 | 0.340699816 |
| ENSG00000186907 | RTN4RL2   | 1 | 0.340699816 |
| ENSG00000186908 | ZDHHC17   | 1 | 0.340699816 |
| ENSG00000186912 | P2RY4     | 1 | 1.033519553 |
| ENSG00000186919 | ZACN      | 1 | 0.613407821 |
| ENSG00000186952 | TMEM232   | 1 | 1.033898305 |
| ENSG00000186973 | FAM183A   | 1 | 1.033519553 |
| ENSG00000187054 | TMPRSS11A | 1 | 1.033519553 |
| ENSG00000187105 | HEATR4    | 1 | 1.033519553 |
| ENSG00000187123 | LYPD6     | 1 | 0.340699816 |
| ENSG00000187151 | ANGPTL5   | 1 | 1.033519553 |
| ENSG00000187164 | KIAA1598  | 1 | 0.340699816 |

|                 |            |   |             |
|-----------------|------------|---|-------------|
| ENSG00000187189 | TSPYL4     | 1 | 0.340699816 |
| ENSG00000187242 | KRT12      | 1 | 0.340699816 |
| ENSG00000187257 | RSBN1L     | 1 | 0.613407821 |
| ENSG00000187461 | AL583828.1 | 1 | 1.033519553 |
| ENSG00000187474 | FPR3       | 1 | 0.340699816 |
| ENSG00000187475 | HIST1H1T   | 1 | 0.340699816 |
| ENSG00000187486 | KCNJ11     | 1 | 1.033519553 |
| ENSG00000187492 | CDHR4      | 1 | 0.730427764 |
| ENSG00000187498 | COL4A1     | 1 | 1.033519553 |
| ENSG00000187522 | HSPA14     | 1 | 1.033519553 |
| ENSG00000187600 | TMEM247    | 1 | 1.033519553 |
| ENSG00000187609 | EXD3       | 1 | 1.034285714 |
| ENSG00000187616 | TMEM8C     | 1 | 1.033519553 |
| ENSG00000187634 | SAMD11     | 1 | 1.034285714 |
| ENSG00000187658 | C5orf52    | 1 | 1.033519553 |
| ENSG00000187678 | SPRY4      | 1 | 0.613407821 |
| ENSG00000187689 | AMTN       | 1 | 1.033519553 |
| ENSG00000187715 | KBTBD12    | 1 | 0.340699816 |
| ENSG00000187726 | DNAJB13    | 1 | 0.340699816 |
| ENSG00000187733 | AMY1C      | 1 | 0.340699816 |
| ENSG00000187742 | SECISBP2   | 1 | 0.340699816 |
| ENSG00000187758 | ADH1A      | 1 | 0.340699816 |
| ENSG00000187764 | SEMA4D     | 1 | 1.033519553 |
| ENSG00000187766 | KRTAP10-8  | 1 | 1.033519553 |
| ENSG00000187778 | MCRS1      | 1 | 0.340699816 |
| ENSG00000187790 | FANCM      | 1 | 1.033519553 |
| ENSG00000187800 | PEAR1      | 1 | 0.340699816 |
| ENSG00000187806 | TMEM202    | 1 | 1.033519553 |
| ENSG00000187860 | CCDC157    | 1 | 1.033898305 |
| ENSG00000187866 | FAM122A    | 1 | 0.340699816 |
| ENSG00000187889 | C1orf168   | 1 | 1.033898305 |
| ENSG00000187955 | COL14A1    | 1 | 1.034682081 |
| ENSG00000187959 | CPSF4L     | 1 | 0.613407821 |
| ENSG00000188000 | OR7D2      | 1 | 0.340699816 |
| ENSG00000188001 | TPRG1      | 1 | 1.033519553 |
| ENSG00000188038 | NRN1L      | 1 | 1.033519553 |
| ENSG00000188039 | NWD1       | 1 | 1.035087719 |
| ENSG00000188086 | PRSS45     | 1 | 0.340699816 |
| ENSG00000188089 | PLA2G4E    | 1 | 0.340699816 |
| ENSG00000188124 | OR2AG2     | 1 | 0.340699816 |
| ENSG00000188176 | SMTNL2     | 1 | 0.613407821 |
| ENSG00000188211 | NCR3LG1    | 1 | 0.340699816 |
| ENSG00000188269 | OR7A5      | 1 | 0.340699816 |
| ENSG00000188282 | RUFY4      | 1 | 1.034285714 |
| ENSG00000188306 | LRRIQ4     | 1 | 0.340699816 |
| ENSG00000188312 | CENPP      | 1 | 0.340699816 |
| ENSG00000188313 | PLSCR1     | 1 | 0.613407821 |

|                 |           |   |             |
|-----------------|-----------|---|-------------|
| ENSG00000188316 | ENO4      | 1 | 0.613407821 |
| ENSG00000188321 | ZNF559    | 1 | 1.033519553 |
| ENSG00000188322 | SBK1      | 1 | 0.340699816 |
| ENSG00000188342 | GTF2F2    | 1 | 0.340699816 |
| ENSG00000188452 | CERKL     | 1 | 1.033519553 |
| ENSG00000188487 | INSC      | 1 | 1.033519553 |
| ENSG00000188488 | SERPINA5  | 1 | 0.340699816 |
| ENSG00000188522 | FAM83G    | 1 | 0.340699816 |
| ENSG00000188566 | NDOR1     | 1 | 0.340699816 |
| ENSG00000188655 | RNASE9    | 1 | 0.340699816 |
| ENSG00000188687 | SLC4A5    | 1 | 1.033519553 |
| ENSG00000188690 | UROS      | 1 | 0.340699816 |
| ENSG00000188707 | ZBED6CL   | 1 | 0.340699816 |
| ENSG00000188716 | DUPD1     | 1 | 1.033519553 |
| ENSG00000188732 | FAM221A   | 1 | 1.033519553 |
| ENSG00000188760 | TMEM198   | 1 | 0.340699816 |
| ENSG00000188846 | RPL14     | 1 | 1.033898305 |
| ENSG00000188878 | FBF1      | 1 | 1.033519553 |
| ENSG00000188886 | ASTL      | 1 | 0.340699816 |
| ENSG00000188895 | MSL1      | 1 | 0.340699816 |
| ENSG00000188909 | BSX       | 1 | 0.340699816 |
| ENSG00000188910 | GJB3      | 1 | 1.033519553 |
| ENSG00000188938 | FAM120AOS | 1 | 0.340699816 |
| ENSG00000188996 | HUS1B     | 1 | 0.340699816 |
| ENSG00000189050 | RNFT1     | 1 | 0.613407821 |
| ENSG00000189058 | APOD      | 1 | 0.340699816 |
| ENSG00000189114 | BLOC1S3   | 1 | 0.340699816 |
| ENSG00000189127 | ANKRD34B  | 1 | 1.033519553 |
| ENSG00000189134 | NKAPL     | 1 | 0.795555556 |
| ENSG00000189139 | FSCB      | 1 | 1.033519553 |
| ENSG00000189144 | ZNF573    | 1 | 0.340699816 |
| ENSG00000189159 | HN1       | 1 | 0.340699816 |
| ENSG00000189171 | S100A13   | 1 | 0.340699816 |
| ENSG00000189184 | PCDH18    | 1 | 1.033898305 |
| ENSG00000189298 | ZKSCAN3   | 1 | 1.033519553 |
| ENSG00000189320 | FAM180A   | 1 | 0.340699816 |
| ENSG00000189325 | C6orf222  | 1 | 1.033898305 |
| ENSG00000189337 | KAZN      | 1 | 1.033519553 |
| ENSG00000196092 | PAX5      | 1 | 0.340699816 |
| ENSG00000196109 | ZNF676    | 1 | 1.033519553 |
| ENSG00000196118 | C16orf93  | 1 | 0.340699816 |
| ENSG00000196136 | SERPINA3  | 1 | 0.730427764 |
| ENSG00000196169 | KIF19     | 1 | 0.795555556 |
| ENSG00000196172 | ZNF681    | 1 | 1.033519553 |
| ENSG00000196187 | TMEM63A   | 1 | 1.033898305 |
| ENSG00000196188 | CTSE      | 1 | 1.033519553 |
| ENSG00000196196 | HRCT1     | 1 | 0.613407821 |

|                 |          |   |             |
|-----------------|----------|---|-------------|
| ENSG00000196208 | GREB1    | 1 | 0.730427764 |
| ENSG00000196209 | SIRPB2   | 1 | 0.340699816 |
| ENSG00000196220 | SRGAP3   | 1 | 0.340699816 |
| ENSG00000196290 | NIF3L1   | 1 | 0.340699816 |
| ENSG00000196296 | ATP2A1   | 1 | 1.033519553 |
| ENSG00000196329 | GIMAP5   | 1 | 1.033519553 |
| ENSG00000196341 | OR8D1    | 1 | 1.033519553 |
| ENSG00000196388 | INCA1    | 1 | 0.613407821 |
| ENSG00000196417 | ZNF765   | 1 | 0.340699816 |
| ENSG00000196418 | ZNF124   | 1 | 1.033519553 |
| ENSG00000196422 | PPP1R26  | 1 | 1.033519553 |
| ENSG00000196428 | TSC22D2  | 1 | 1.033898305 |
| ENSG00000196475 | GK2      | 1 | 0.613407821 |
| ENSG00000196476 | C20orf96 | 1 | 0.340699816 |
| ENSG00000196498 | NCOR2    | 1 | 1.034285714 |
| ENSG00000196549 | MME      | 1 | 0.613407821 |
| ENSG00000196565 | HBG2     | 1 | 1.033519553 |
| ENSG00000196576 | PLXNB2   | 1 | 0.340699816 |
| ENSG00000196586 | MYO6     | 1 | 0.613407821 |
| ENSG00000196611 | MMP1     | 1 | 0.613407821 |
| ENSG00000196620 | UGT2B15  | 1 | 0.613407821 |
| ENSG00000196642 | RABL6    | 1 | 1.033519553 |
| ENSG00000196646 | ZNF136   | 1 | 0.340699816 |
| ENSG00000196652 | ZKSCAN5  | 1 | 0.340699816 |
| ENSG00000196659 | TTC30B   | 1 | 1.033898305 |
| ENSG00000196663 | TECPR2   | 1 | 1.033519553 |
| ENSG00000196664 | TLR7     | 1 | 0.340699816 |
| ENSG00000196670 | ZFP62    | 1 | 0.340699816 |
| ENSG00000196678 | ERI2     | 1 | 0.613407821 |
| ENSG00000196683 | TOMM7    | 1 | 0.340699816 |
| ENSG00000196684 | HSH2D    | 1 | 0.340699816 |
| ENSG00000196689 | TRPV1    | 1 | 1.033519553 |
| ENSG00000196693 | ZNF33B   | 1 | 0.340699816 |
| ENSG00000196700 | ZNF512B  | 1 | 0.340699816 |
| ENSG00000196724 | ZNF418   | 1 | 0.340699816 |
| ENSG00000196730 | DAPK1    | 1 | 1.034285714 |
| ENSG00000196754 | S100A2   | 1 | 0.340699816 |
| ENSG00000196757 | ZNF700   | 1 | 1.033519553 |
| ENSG00000196782 | MAML3    | 1 | 0.795555556 |
| ENSG00000196792 | STRN3    | 1 | 0.340699816 |
| ENSG00000196793 | ZNF239   | 1 | 0.340699816 |
| ENSG00000196867 | ZFP28    | 1 | 0.340699816 |
| ENSG00000196900 | C5orf48  | 1 | 0.340699816 |
| ENSG00000196932 | TMEM26   | 1 | 0.340699816 |
| ENSG00000196975 | ANXA4    | 1 | 1.033519553 |
| ENSG00000196976 | LAGE3    | 1 | 0.340699816 |
| ENSG00000197008 | ZNF138   | 1 | 1.033519553 |

|                 |               |   |             |
|-----------------|---------------|---|-------------|
| ENSG00000197013 | ZNF429        | 1 | 0.340699816 |
| ENSG00000197016 | ZNF470        | 1 | 0.613407821 |
| ENSG00000197057 | DTHD1         | 1 | 0.340699816 |
| ENSG00000197070 | ARRDC1        | 1 | 0.340699816 |
| ENSG00000197077 | KIAA1671      | 1 | 0.613407821 |
| ENSG00000197081 | IGF2R         | 1 | 1.034285714 |
| ENSG00000197106 | SLC6A17       | 1 | 1.033519553 |
| ENSG00000197128 | ZNF772        | 1 | 0.613407821 |
| ENSG00000197136 | PCNXL3        | 1 | 1.034285714 |
| ENSG00000197140 | ADAM32        | 1 | 0.613407821 |
| ENSG00000197157 | SND1          | 1 | 0.340699816 |
| ENSG00000197191 | C9orf169      | 1 | 0.340699816 |
| ENSG00000197213 | ZSCAN5B       | 1 | 1.033519553 |
| ENSG00000197217 | ENTPD4        | 1 | 0.730427764 |
| ENSG00000197241 | SLC2A7        | 1 | 0.730427764 |
| ENSG00000197263 | OR8D2         | 1 | 0.340699816 |
| ENSG00000197265 | GTF2E2        | 1 | 1.033519553 |
| ENSG00000197272 | IL27          | 1 | 0.340699816 |
| ENSG00000197275 | RAD54B        | 1 | 0.340699816 |
| ENSG00000197301 | RP11-366L20.2 | 1 | 0.340699816 |
| ENSG00000197345 | MRPL21        | 1 | 0.340699816 |
| ENSG00000197355 | UAP1L1        | 1 | 0.613407821 |
| ENSG00000197361 | FBXL22        | 1 | 0.340699816 |
| ENSG00000197362 | ZNF786        | 1 | 0.340699816 |
| ENSG00000197363 | ZNF517        | 1 | 1.033519553 |
| ENSG00000197364 | S100A7L2      | 1 | 0.340699816 |
| ENSG00000197381 | ADARB1        | 1 | 1.033519553 |
| ENSG00000197385 | ZNF860        | 1 | 1.033898305 |
| ENSG00000197386 | HTT           | 1 | 0.887179487 |
| ENSG00000197403 | OR6N1         | 1 | 1.033519553 |
| ENSG00000197406 | DIO3          | 1 | 0.340699816 |
| ENSG00000197467 | COL13A1       | 1 | 0.340699816 |
| ENSG00000197487 | GALP          | 1 | 0.340699816 |
| ENSG00000197497 | ZNF665        | 1 | 1.033519553 |
| ENSG00000197540 | GZMM          | 1 | 1.033519553 |
| ENSG00000197565 | COL4A6        | 1 | 1.033898305 |
| ENSG00000197591 | OR11L1        | 1 | 1.033519553 |
| ENSG00000197594 | ENPP1         | 1 | 1.033898305 |
| ENSG00000197595 | C13orf35      | 1 | 1.033519553 |
| ENSG00000197601 | FAR1          | 1 | 0.340699816 |
| ENSG00000197616 | MYH6          | 1 | 1.033519553 |
| ENSG00000197632 | SERPINB2      | 1 | 1.033519553 |
| ENSG00000197646 | PDCD1LG2      | 1 | 1.033519553 |
| ENSG00000197721 | CR1L          | 1 | 0.340699816 |
| ENSG00000197753 | LHFPL5        | 1 | 0.340699816 |
| ENSG00000197757 | HOXC6         | 1 | 1.033519553 |
| ENSG00000197763 | TXNRD3        | 1 | 0.340699816 |

|                 |           |   |             |
|-----------------|-----------|---|-------------|
| ENSG00000197769 | MAP1LC3C  | 1 | 1.033519553 |
| ENSG00000197776 | KLHDC1    | 1 | 1.033519553 |
| ENSG00000197786 | OR5B17    | 1 | 1.033519553 |
| ENSG00000197790 | OR52M1    | 1 | 0.340699816 |
| ENSG00000197798 | FAM118B   | 1 | 0.340699816 |
| ENSG00000197859 | ADAMTSL2  | 1 | 0.340699816 |
| ENSG00000197860 | SGTB      | 1 | 0.340699816 |
| ENSG00000197863 | ZNF790    | 1 | 0.613407821 |
| ENSG00000197887 | OR1S2     | 1 | 0.340699816 |
| ENSG00000197888 | UGT2B17   | 1 | 0.340699816 |
| ENSG00000197889 | MEIG1     | 1 | 0.340699816 |
| ENSG00000197892 | KIF13B    | 1 | 0.613407821 |
| ENSG00000197905 | TEAD4     | 1 | 1.033519553 |
| ENSG00000197961 | ZNF121    | 1 | 1.033519553 |
| ENSG00000197980 | LEKR1     | 1 | 0.340699816 |
| ENSG00000197993 | KEL       | 1 | 1.033519553 |
| ENSG00000198000 | NOL8      | 1 | 0.730427764 |
| ENSG00000198003 | CCDC151   | 1 | 1.033898305 |
| ENSG00000198018 | ENTPD7    | 1 | 1.033519553 |
| ENSG00000198026 | ZNF335    | 1 | 1.033898305 |
| ENSG00000198049 | AVPR1B    | 1 | 1.033898305 |
| ENSG00000198053 | SIRPA     | 1 | 0.340699816 |
| ENSG00000198054 | DSCR8     | 1 | 0.340699816 |
| ENSG00000198074 | AKR1B10   | 1 | 1.033898305 |
| ENSG00000198089 | SFI1      | 1 | 1.033898305 |
| ENSG00000198092 | TMPRSS11F | 1 | 1.033898305 |
| ENSG00000198131 | ZNF544    | 1 | 0.795555556 |
| ENSG00000198146 | ZNF770    | 1 | 0.340699816 |
| ENSG00000198157 | HMG5      | 1 | 0.340699816 |
| ENSG00000198160 | MIER1     | 1 | 0.340699816 |
| ENSG00000198182 | ZNF607    | 1 | 1.033519553 |
| ENSG00000198189 | HSD17B11  | 1 | 0.340699816 |
| ENSG00000198208 | RPS6KL1   | 1 | 1.033519553 |
| ENSG00000198246 | SLC29A3   | 1 | 1.033898305 |
| ENSG00000198252 | STYX      | 1 | 0.340699816 |
| ENSG00000198265 | HELZ      | 1 | 0.340699816 |
| ENSG00000198286 | CARD11    | 1 | 0.340699816 |
| ENSG00000198326 | TMEM239   | 1 | 1.033519553 |
| ENSG00000198342 | ZNF442    | 1 | 0.340699816 |
| ENSG00000198363 | ASPH      | 1 | 1.034285714 |
| ENSG00000198369 | SPRED2    | 1 | 1.033519553 |
| ENSG00000198382 | UVRAG     | 1 | 1.033519553 |
| ENSG00000198408 | MGEA5     | 1 | 0.340699816 |
| ENSG00000198429 | ZNF69     | 1 | 0.340699816 |
| ENSG00000198453 | ZNF568    | 1 | 0.340699816 |
| ENSG00000198482 | ZNF808    | 1 | 1.033519553 |
| ENSG00000198492 | YTHDF2    | 1 | 1.033519553 |

|                 |           |   |             |
|-----------------|-----------|---|-------------|
| ENSG00000198517 | MAFK      | 1 | 0.340699816 |
| ENSG00000198520 | C1orf228  | 1 | 0.340699816 |
| ENSG00000198522 | GPN1      | 1 | 0.340699816 |
| ENSG00000198542 | ITGBL1    | 1 | 1.033519553 |
| ENSG00000198546 | ZNF511    | 1 | 1.033898305 |
| ENSG00000198553 | KCNRG     | 1 | 0.340699816 |
| ENSG00000198558 | HIST1H4L  | 1 | 1.033519553 |
| ENSG00000198569 | SLC34A3   | 1 | 0.613407821 |
| ENSG00000198589 | LRBA      | 1 | 1.034285714 |
| ENSG00000198597 | ZNF536    | 1 | 1.033519553 |
| ENSG00000198604 | BAZ1A     | 1 | 0.340699816 |
| ENSG00000198612 | COPS8     | 1 | 0.340699816 |
| ENSG00000198625 | MDM4      | 1 | 1.033519553 |
| ENSG00000198626 | RYR2      | 1 | 1.033519553 |
| ENSG00000198633 | ZNF534    | 1 | 0.613407821 |
| ENSG00000198642 | KLHL9     | 1 | 1.033519553 |
| ENSG00000198646 | NCOA6     | 1 | 1.033519553 |
| ENSG00000198648 | STK39     | 1 | 1.033519553 |
| ENSG00000198682 | PAPSS2    | 1 | 0.340699816 |
| ENSG00000198685 | C3orf27   | 1 | 0.340699816 |
| ENSG00000198689 | SLC9A6    | 1 | 0.340699816 |
| ENSG00000198690 | FAN1      | 1 | 0.340699816 |
| ENSG00000198718 | FAM179B   | 1 | 1.033519553 |
| ENSG00000198721 | ECI2      | 1 | 1.033519553 |
| ENSG00000198739 | LRRTM3    | 1 | 0.340699816 |
| ENSG00000198753 | PLXNB3    | 1 | 1.033519553 |
| ENSG00000198756 | COLGALT2  | 1 | 1.034285714 |
| ENSG00000198758 | EPS8L3    | 1 | 1.033519553 |
| ENSG00000198771 | RCSD1     | 1 | 1.033519553 |
| ENSG00000198785 | GRIN3A    | 1 | 1.035087719 |
| ENSG00000198792 | TMEM184B  | 1 | 0.340699816 |
| ENSG00000198795 | ZNF521    | 1 | 1.033519553 |
| ENSG00000198796 | ALPK2     | 1 | 1.034682081 |
| ENSG00000198826 | ARHGAP11A | 1 | 0.613407821 |
| ENSG00000198829 | SUCNR1    | 1 | 0.340699816 |
| ENSG00000198838 | RYR3      | 1 | 0.837099317 |
| ENSG00000198844 | ARHGEF15  | 1 | 1.033898305 |
| ENSG00000198848 | CES1      | 1 | 0.613407821 |
| ENSG00000198855 | FICD      | 1 | 1.033898305 |
| ENSG00000198911 | SREBF2    | 1 | 1.033519553 |
| ENSG00000198920 | KIAA0753  | 1 | 0.340699816 |
| ENSG00000198925 | ATG9A     | 1 | 1.033898305 |
| ENSG00000198929 | NOS1AP    | 1 | 0.340699816 |
| ENSG00000198948 | MFAP3L    | 1 | 0.340699816 |
| ENSG00000198954 | KIAA1279  | 1 | 0.340699816 |
| ENSG00000198959 | TGM2      | 1 | 0.340699816 |
| ENSG00000198965 | OR10R2    | 1 | 0.340699816 |

|                 |            |   |             |
|-----------------|------------|---|-------------|
| ENSG00000198967 | OR10Z1     | 1 | 0.340699816 |
| ENSG00000203691 | AC092811.1 | 1 | 1.033519553 |
| ENSG00000203705 | TATDN3     | 1 | 0.613407821 |
| ENSG00000203737 | GPR52      | 1 | 0.340699816 |
| ENSG00000203740 | METTL11B   | 1 | 0.340699816 |
| ENSG00000203756 | TMEM244    | 1 | 0.340699816 |
| ENSG00000203797 | DDO        | 1 | 0.613407821 |
| ENSG00000203837 | PNLIPRP3   | 1 | 1.033898305 |
| ENSG00000203867 | RBM20      | 1 | 0.613407821 |
| ENSG00000203963 | C1orf141   | 1 | 1.034285714 |
| ENSG00000204006 | C1orf185   | 1 | 1.033519553 |
| ENSG00000204033 | LRIT2      | 1 | 0.340699816 |
| ENSG00000204084 | INPP5B     | 1 | 0.340699816 |
| ENSG00000204104 | TRAF3IP1   | 1 | 0.613407821 |
| ENSG00000204120 | GIGYF2     | 1 | 0.340699816 |
| ENSG00000204175 | GPRIN2     | 1 | 1.033519553 |
| ENSG00000204186 | ZDBF2      | 1 | 1.034285714 |
| ENSG00000204193 | TXNDC8     | 1 | 0.340699816 |
| ENSG00000204195 | AWAT1      | 1 | 1.033519553 |
| ENSG00000204267 | TAP2       | 1 | 1.033898305 |
| ENSG00000204300 | TMEM225    | 1 | 1.033519553 |
| ENSG00000204304 | PBX2       | 1 | 0.340699816 |
| ENSG00000204311 | DFNB59     | 1 | 0.340699816 |
| ENSG00000204347 | BTBD17     | 1 | 1.033519553 |
| ENSG00000204385 | SLC44A4    | 1 | 1.033898305 |
| ENSG00000204394 | VAR5       | 1 | 0.613407821 |
| ENSG00000204397 | CARD16     | 1 | 0.340699816 |
| ENSG00000204403 | CASP12     | 1 | 1.033519553 |
| ENSG00000204420 | C6orf25    | 1 | 0.340699816 |
| ENSG00000204421 | LY6G6C     | 1 | 1.033519553 |
| ENSG00000204424 | LY6G6F     | 1 | 0.340699816 |
| ENSG00000204439 | C6orf47    | 1 | 0.613407821 |
| ENSG00000204524 | ZNF805     | 1 | 1.033519553 |
| ENSG00000204532 | ZSCAN5C    | 1 | 1.033519553 |
| ENSG00000204536 | CCHCR1     | 1 | 0.613407821 |
| ENSG00000204538 | PSORS1C2   | 1 | 1.033898305 |
| ENSG00000204580 | DDR1       | 1 | 1.033519553 |
| ENSG00000204599 | TRIM39     | 1 | 0.340699816 |
| ENSG00000204613 | TRIM10     | 1 | 0.340699816 |
| ENSG00000204616 | TRIM31     | 1 | 0.730427764 |
| ENSG00000204624 | PTCHD2     | 1 | 0.613407821 |
| ENSG00000204632 | HLA-G      | 1 | 1.033519553 |
| ENSG00000204634 | TBC1D8     | 1 | 1.033898305 |
| ENSG00000204659 | CBY3       | 1 | 1.033519553 |
| ENSG00000204683 | C10orf113  | 1 | 0.340699816 |
| ENSG00000204694 | OR11A1     | 1 | 1.033519553 |
| ENSG00000204713 | TRIM27     | 1 | 1.033519553 |

|                 |           |   |             |
|-----------------|-----------|---|-------------|
| ENSG00000204764 | RANBP17   | 1 | 1.033898305 |
| ENSG00000204767 | FAM196B   | 1 | 1.033519553 |
| ENSG00000204822 | MRPL53    | 1 | 1.033519553 |
| ENSG00000204839 | MROH6     | 1 | 1.033519553 |
| ENSG00000204852 | TCTN1     | 1 | 0.613407821 |
| ENSG00000204856 | FAM216A   | 1 | 0.730427764 |
| ENSG00000204866 | IGFL2     | 1 | 1.033519553 |
| ENSG00000204882 | GPR20     | 1 | 0.340699816 |
| ENSG00000204941 | PSG5      | 1 | 0.340699816 |
| ENSG00000204952 | FBXO47    | 1 | 1.033519553 |
| ENSG00000204961 | PCDHA9    | 1 | 1.033519553 |
| ENSG00000204962 | PCDHA8    | 1 | 1.034285714 |
| ENSG00000204963 | PCDHA7    | 1 | 1.033519553 |
| ENSG00000204965 | PCDHA5    | 1 | 1.033898305 |
| ENSG00000204967 | PCDHA4    | 1 | 1.033519553 |
| ENSG00000204969 | PCDHA2    | 1 | 1.033519553 |
| ENSG00000204970 | PCDHA1    | 1 | 1.033898305 |
| ENSG00000204991 | SPIRE2    | 1 | 0.340699816 |
| ENSG00000205022 | PABPN1L   | 1 | 1.033519553 |
| ENSG00000205030 | OR5L2     | 1 | 0.340699816 |
| ENSG00000205078 | SYCE1L    | 1 | 1.033519553 |
| ENSG00000205084 | TMEM231   | 1 | 1.033519553 |
| ENSG00000205085 | FAM71F2   | 1 | 0.730427764 |
| ENSG00000205108 | FAM205A   | 1 | 0.730427764 |
| ENSG00000205111 | CDKL4     | 1 | 0.340699816 |
| ENSG00000205126 | ACCSL     | 1 | 0.730427764 |
| ENSG00000205129 | C4orf47   | 1 | 0.340699816 |
| ENSG00000205143 | ARID3C    | 1 | 0.340699816 |
| ENSG00000205220 | PSMB10    | 1 | 0.340699816 |
| ENSG00000205309 | NT5M      | 1 | 1.033519553 |
| ENSG00000205330 | OR6C1     | 1 | 0.340699816 |
| ENSG00000205356 | TECPR1    | 1 | 1.033519553 |
| ENSG00000205436 | EXOC3L4   | 1 | 1.033898305 |
| ENSG00000205517 | RGL3      | 1 | 1.033898305 |
| ENSG00000205531 | NAP1L4    | 1 | 0.340699816 |
| ENSG00000205560 | CPT1B     | 1 | 1.033519553 |
| ENSG00000205693 | MANSC4    | 1 | 0.340699816 |
| ENSG00000205710 | C17orf107 | 1 | 0.340699816 |
| ENSG00000205726 | ITSN1     | 1 | 0.340699816 |
| ENSG00000205784 | ARRDC5    | 1 | 1.033898305 |
| ENSG00000205856 | C22orf42  | 1 | 0.340699816 |
| ENSG00000206052 | DOK6      | 1 | 1.033519553 |
| ENSG00000206072 | SERPINB11 | 1 | 1.033898305 |
| ENSG00000206073 | SERPINB4  | 1 | 0.340699816 |
| ENSG00000206177 | HBM       | 1 | 0.340699816 |
| ENSG00000206384 | COL6A6    | 1 | 1.033898305 |
| ENSG00000206422 | LRR30     | 1 | 0.340699816 |

|                 |               |   |             |
|-----------------|---------------|---|-------------|
| ENSG00000206483 | TXNRD3NB      | 1 | 0.340699816 |
| ENSG00000211626 | IGKV6D-41     | 1 | 0.340699816 |
| ENSG00000211637 | IGLV4-69      | 1 | 0.340699816 |
| ENSG00000211641 | IGLV11-55     | 1 | 1.033519553 |
| ENSG00000211643 | IGLV5-52      | 1 | 1.033519553 |
| ENSG00000211655 | IGLV1-36      | 1 | 0.340699816 |
| ENSG00000211693 | TRGV11        | 1 | 0.340699816 |
| ENSG00000211716 | TRBV9         | 1 | 1.033519553 |
| ENSG00000211727 | TRBV7-6       | 1 | 0.340699816 |
| ENSG00000211783 | TRAV9-1       | 1 | 0.340699816 |
| ENSG00000211789 | TRAV12-2      | 1 | 0.340699816 |
| ENSG00000211791 | TRAV13-2      | 1 | 1.033519553 |
| ENSG00000211792 | TRAV14DV4     | 1 | 0.340699816 |
| ENSG00000211812 | TRAV26-2      | 1 | 0.340699816 |
| ENSG00000211815 | TRAV36DV7     | 1 | 1.033519553 |
| ENSG00000211820 | TRAV41        | 1 | 1.033519553 |
| ENSG00000211899 | IGHM          | 1 | 0.613407821 |
| ENSG00000211958 | IGHV3-38      | 1 | 1.033519553 |
| ENSG00000212743 | DKFZP667F0711 | 1 | 0.340699816 |
| ENSG00000212938 | KRTAP6-3      | 1 | 0.340699816 |
| ENSG00000213024 | NUP62         | 1 | 1.033519553 |
| ENSG00000213123 | TCTEX1D2      | 1 | 0.340699816 |
| ENSG00000213265 | TSGA13        | 1 | 0.340699816 |
| ENSG00000213390 | ARHGAP19      | 1 | 0.340699816 |
| ENSG00000213471 | TTL13         | 1 | 0.340699816 |
| ENSG00000213512 | GBP7          | 1 | 0.340699816 |
| ENSG00000213523 | SRA1          | 1 | 1.033519553 |
| ENSG00000213593 | TMX2          | 1 | 0.613407821 |
| ENSG00000213614 | HEXA          | 1 | 1.033519553 |
| ENSG00000213619 | NDUFS3        | 1 | 0.340699816 |
| ENSG00000213672 | NCKIPSD       | 1 | 1.033519553 |
| ENSG00000213676 | ATF6B         | 1 | 0.340699816 |
| ENSG00000213689 | TREX1         | 1 | 1.033519553 |
| ENSG00000213714 | FAM209B       | 1 | 0.613407821 |
| ENSG00000213782 | DDX47         | 1 | 0.340699816 |
| ENSG00000213822 | CEACAM18      | 1 | 0.340699816 |
| ENSG00000213977 | TAX1BP3       | 1 | 0.340699816 |
| ENSG00000213988 | ZNF90         | 1 | 1.033519553 |
| ENSG00000214021 | TTLL3         | 1 | 0.613407821 |
| ENSG00000214022 | REPIN1        | 1 | 0.613407821 |
| ENSG00000214102 | WEE2          | 1 | 0.340699816 |
| ENSG00000214128 | TMEM213       | 1 | 0.340699816 |
| ENSG00000214193 | SH3D21        | 1 | 1.033898305 |
| ENSG00000214212 | C19orf38      | 1 | 1.033519553 |
| ENSG00000214309 | MBLAC1        | 1 | 1.033519553 |
| ENSG00000214360 | EFCAB9        | 1 | 0.613407821 |
| ENSG00000214367 | HAUS3         | 1 | 1.033898305 |

|                 |            |   |             |
|-----------------|------------|---|-------------|
| ENSG00000214376 | VSTM5      | 1 | 0.340699816 |
| ENSG00000214435 | AS3MT      | 1 | 0.340699816 |
| ENSG00000214511 | HIGD1C     | 1 | 0.340699816 |
| ENSG00000214655 | ZSWIM8     | 1 | 1.033519553 |
| ENSG00000214681 | IQCF5      | 1 | 0.340699816 |
| ENSG00000214686 | IQCF6      | 1 | 0.613407821 |
| ENSG00000214694 | ARHGEF33   | 1 | 1.033519553 |
| ENSG00000214753 | HNRNPUL2   | 1 | 0.340699816 |
| ENSG00000214756 | METTL12    | 1 | 0.340699816 |
| ENSG00000214842 | RAD51AP2   | 1 | 1.033898305 |
| ENSG00000214954 | LRRC69     | 1 | 0.340699816 |
| ENSG00000214960 | ISPD       | 1 | 1.033519553 |
| ENSG00000214999 | AC129492.6 | 1 | 1.033519553 |
| ENSG00000215067 | AC027763.2 | 1 | 0.340699816 |
| ENSG00000215262 | KCNU1      | 1 | 0.795555556 |
| ENSG00000215271 | HOMEZ      | 1 | 1.033519553 |
| ENSG00000215428 | AL354898.1 | 1 | 0.340699816 |
| ENSG00000215474 | SKOR2      | 1 | 0.340699816 |
| ENSG00000215644 | GCGR       | 1 | 0.340699816 |
| ENSG00000215695 | RSC1A1     | 1 | 0.613407821 |
| ENSG00000215712 | TMEM242    | 1 | 1.033519553 |
| ENSG00000215853 | RPTN       | 1 | 0.340699816 |
| ENSG00000217128 | FNIP1      | 1 | 1.033898305 |
| ENSG00000218823 | PAPOLB     | 1 | 1.033519553 |
| ENSG00000219200 | RNASEK     | 1 | 0.340699816 |
| ENSG00000221855 | TAS2R41    | 1 | 1.033519553 |
| ENSG00000221900 | POM121L12  | 1 | 1.033519553 |
| ENSG00000221949 | C12orf61   | 1 | 0.340699816 |
| ENSG00000221968 | FADS3      | 1 | 1.033519553 |
| ENSG00000221977 | OR4E2      | 1 | 1.033519553 |
| ENSG00000221990 | C5orf55    | 1 | 0.340699816 |
| ENSG00000221996 | OR52B4     | 1 | 0.340699816 |
| ENSG00000222040 | ADRA2B     | 1 | 0.340699816 |
| ENSG00000223350 | IGLV9-49   | 1 | 0.340699816 |
| ENSG00000223547 | ZNF844     | 1 | 1.033898305 |
| ENSG00000223609 | HBD        | 1 | 1.033519553 |
| ENSG00000224051 | GLTPD1     | 1 | 1.033519553 |
| ENSG00000224940 | PRRT4      | 1 | 0.340699816 |
| ENSG00000225683 | AL078585.1 | 1 | 0.340699816 |
| ENSG00000225697 | SLC26A6    | 1 | 1.033898305 |
| ENSG00000225781 | OR6V1      | 1 | 0.613407821 |
| ENSG00000225950 | NTF4       | 1 | 0.340699816 |
| ENSG00000226372 | DCAF8L1    | 1 | 1.033519553 |
| ENSG00000226763 | SRRM5      | 1 | 1.033519553 |
| ENSG00000226807 | MROH5      | 1 | 0.340699816 |
| ENSG00000229200 | TRBV7-8    | 1 | 1.033519553 |
| ENSG00000229314 | ORM1       | 1 | 1.033519553 |

|                 |            |   |             |
|-----------------|------------|---|-------------|
| ENSG00000229769 | TRBV10-2   | 1 | 0.340699816 |
| ENSG00000229972 | IQCF3      | 1 | 1.033519553 |
| ENSG00000232119 | MCTS1      | 1 | 0.340699816 |
| ENSG00000232629 | HLA-DQB2   | 1 | 1.033519553 |
| ENSG00000233436 | BTBD18     | 1 | 0.340699816 |
| ENSG00000233539 | AC011294.3 | 1 | 0.340699816 |
| ENSG00000233701 | PRR23C     | 1 | 0.340699816 |
| ENSG00000233932 | CTXN2      | 1 | 0.340699816 |
| ENSG00000234127 | TRIM26     | 1 | 0.613407821 |
| ENSG00000234438 | KBTBD13    | 1 | 1.033519553 |
| ENSG00000234776 | C11orf94   | 1 | 0.340699816 |
| ENSG00000234906 | APOC2      | 1 | 0.340699816 |
| ENSG00000235109 | ZSCAN31    | 1 | 1.033898305 |
| ENSG00000235718 | MFRP       | 1 | 1.033519553 |
| ENSG00000235750 | KIAA0040   | 1 | 0.340699816 |
| ENSG00000236032 | OR5H14     | 1 | 1.033519553 |
| ENSG00000236624 | CCDC163P   | 1 | 0.340699816 |
| ENSG00000236699 | ARHGEF38   | 1 | 1.033898305 |
| ENSG00000237254 | TRBV30     | 1 | 1.033519553 |
| ENSG00000237330 | RNF223     | 1 | 1.033519553 |
| ENSG00000237388 | OR4A47     | 1 | 0.340699816 |
| ENSG00000237441 | RGL2       | 1 | 1.033519553 |
| ENSG00000239264 | TXNDC5     | 1 | 1.033519553 |
| ENSG00000239305 | RNF103     | 1 | 0.613407821 |
| ENSG00000239306 | RBM14      | 1 | 1.033519553 |
| ENSG00000239388 | ASB14      | 1 | 1.033519553 |
| ENSG00000239389 | PCDHA13    | 1 | 1.033519553 |
| ENSG00000239474 | KLHL41     | 1 | 1.033519553 |
| ENSG00000239590 | OR1J4      | 1 | 0.340699816 |
| ENSG00000239672 | NME1       | 1 | 0.340699816 |
| ENSG00000239732 | TLR9       | 1 | 1.033519553 |
| ENSG00000239887 | C1orf226   | 1 | 1.033519553 |
| ENSG00000239998 | LILRA2     | 1 | 1.033519553 |
| ENSG00000240021 | TEX35      | 1 | 1.033519553 |
| ENSG00000240053 | LY6G5B     | 1 | 0.340699816 |
| ENSG00000240505 | TNFRSF13B  | 1 | 1.033898305 |
| ENSG00000240563 | L1TD1      | 1 | 1.034285714 |
| ENSG00000240654 | C1QTNF9    | 1 | 0.340699816 |
| ENSG00000240764 | PCDHGC5    | 1 | 0.340699816 |
| ENSG00000241058 | NSUN6      | 1 | 1.033519553 |
| ENSG00000241322 | CDRT1      | 1 | 1.033519553 |
| ENSG00000241370 | RPP21      | 1 | 1.033519553 |
| ENSG00000241563 | CORT       | 1 | 0.340699816 |
| ENSG00000241690 | TMEM239    | 1 | 1.033519553 |
| ENSG00000241839 | PLEKHO2    | 1 | 0.340699816 |
| ENSG00000241973 | PI4KA      | 1 | 0.340699816 |
| ENSG00000241978 | AKAP2      | 1 | 0.613407821 |

|                 |               |   |             |
|-----------------|---------------|---|-------------|
| ENSG00000242180 | OR51B5        | 1 | 1.033519553 |
| ENSG00000242247 | ARFGAP3       | 1 | 0.340699816 |
| ENSG00000242252 | BGLAP         | 1 | 0.340699816 |
| ENSG00000242550 | SERPINB10     | 1 | 0.613407821 |
| ENSG00000242802 | AP5Z1         | 1 | 0.340699816 |
| ENSG00000242887 | IGHJ3         | 1 | 1.033519553 |
| ENSG00000243251 | PGBD3         | 1 | 0.340699816 |
| ENSG00000243364 | EFNA4         | 1 | 0.340699816 |
| ENSG00000243477 | NAT6          | 1 | 0.340699816 |
| ENSG00000243678 | NME1-NME2     | 1 | 0.340699816 |
| ENSG00000244045 | TMEM199       | 1 | 1.033519553 |
| ENSG00000244122 | UGT1A7        | 1 | 0.340699816 |
| ENSG00000244476 | ERVFRD-1      | 1 | 1.033898305 |
| ENSG00000244482 | LILRA6        | 1 | 0.340699816 |
| ENSG00000244607 | CCDC13        | 1 | 0.340699816 |
| ENSG00000244617 | ASPRV1        | 1 | 1.033519553 |
| ENSG00000244623 | OR2AE1        | 1 | 1.033519553 |
| ENSG00000244754 | N4BP2L2       | 1 | 1.033519553 |
| ENSG00000247077 | PGAM5         | 1 | 0.340699816 |
| ENSG00000248167 | TRIM39-RPP21  | 1 | 0.340699816 |
| ENSG00000248487 | ABHD14A       | 1 | 0.613407821 |
| ENSG00000248713 | RP11-766F14.2 | 1 | 0.340699816 |
| ENSG00000249115 | HAUS5         | 1 | 0.340699816 |
| ENSG00000249158 | PCDHA11       | 1 | 0.613407821 |
| ENSG00000249240 | AC069368.3    | 1 | 0.340699816 |
| ENSG00000249242 | TMEM150C      | 1 | 0.340699816 |
| ENSG00000249481 | SPATS1        | 1 | 0.340699816 |
| ENSG00000249853 | HS3ST5        | 1 | 0.340699816 |
| ENSG00000249861 | LGALS16       | 1 | 0.613407821 |
| ENSG00000249967 | PI4K2A        | 1 | 0.340699816 |
| ENSG00000250120 | PCDHA10       | 1 | 1.033519553 |
| ENSG00000250151 | ARPC4-TTLL3   | 1 | 1.033519553 |
| ENSG00000250254 | PTTG2         | 1 | 1.033519553 |
| ENSG00000250264 | TAP2          | 1 | 1.033898305 |
| ENSG00000250486 | FAM218A       | 1 | 0.340699816 |
| ENSG00000250510 | GPR162        | 1 | 1.033519553 |
| ENSG00000250571 | GLI4          | 1 | 0.340699816 |
| ENSG00000250588 | IQCJ-SCHIP1   | 1 | 0.340699816 |
| ENSG00000250641 | MEGT1         | 1 | 0.340699816 |
| ENSG00000250733 | C8orf17       | 1 | 1.033519553 |
| ENSG00000250741 | NT5C1B-RDH14  | 1 | 1.033898305 |
| ENSG00000250799 | PRODH2        | 1 | 0.340699816 |
| ENSG00000251192 | ZNF674        | 1 | 0.340699816 |
| ENSG00000251380 | C5orf20       | 1 | 0.340699816 |
| ENSG00000251503 | APITD1-CORT   | 1 | 0.340699816 |
| ENSG00000251537 | RP11-385D13.1 | 1 | 0.340699816 |
| ENSG00000251664 | PCDHA12       | 1 | 1.033519553 |

|                 |               |   |             |
|-----------------|---------------|---|-------------|
| ENSG00000253117 | OC90          | 1 | 0.613407821 |
| ENSG00000253148 | RGS21         | 1 | 0.340699816 |
| ENSG00000253159 | PCDHGA12      | 1 | 0.340699816 |
| ENSG00000253304 | TMEM200B      | 1 | 0.340699816 |
| ENSG00000253598 | SLC10A5       | 1 | 0.613407821 |
| ENSG00000253767 | PCDHGA8       | 1 | 1.034285714 |
| ENSG00000253831 | ETV3L         | 1 | 0.340699816 |
| ENSG00000253910 | PCDHGB2       | 1 | 1.033519553 |
| ENSG00000254349 | RP11-758M4.1  | 1 | 1.033519553 |
| ENSG00000254466 | OR4D10        | 1 | 1.033519553 |
| ENSG00000254470 | AP5B1         | 1 | 0.340699816 |
| ENSG00000254505 | CHMP4A        | 1 | 1.033519553 |
| ENSG00000254521 | SIGLEC12      | 1 | 1.033519553 |
| ENSG00000254535 | PABPC4L       | 1 | 1.033519553 |
| ENSG00000254585 | MAGEL2        | 1 | 1.033519553 |
| ENSG00000254598 | CSNK2A3       | 1 | 0.340699816 |
| ENSG00000254685 | FPGT          | 1 | 0.613407821 |
| ENSG00000254692 | TM9SF1        | 1 | 0.613407821 |
| ENSG00000254706 | RP11-565P22.6 | 1 | 1.033519553 |
| ENSG00000254827 | SLC22A18AS    | 1 | 0.613407821 |
| ENSG00000255093 | RP11-794P6.2  | 1 | 1.033519553 |
| ENSG00000255245 | FXVD6-FXVD2   | 1 | 0.340699816 |
| ENSG00000255307 | OR52B2        | 1 | 1.033519553 |
| ENSG00000255408 | PCDHA3        | 1 | 1.033519553 |
| ENSG00000255468 | RP11-867G23.8 | 1 | 1.033519553 |
| ENSG00000255537 | AP000708.1    | 1 | 1.033519553 |
| ENSG00000255837 | TAS2R20       | 1 | 1.033519553 |
| ENSG00000255874 | LINC00346     | 1 | 0.340699816 |
| ENSG00000255994 | CCDC177       | 1 | 1.033519553 |
| ENSG00000256162 | SMLR1         | 1 | 0.340699816 |
| ENSG00000256269 | HMBS          | 1 | 1.033519553 |
| ENSG00000256349 | CTD-3074O7.11 | 1 | 0.613407821 |
| ENSG00000256574 | OR13A1        | 1 | 1.033898305 |
| ENSG00000256812 | CAPNS2        | 1 | 1.033898305 |
| ENSG00000256870 | SLC5A8        | 1 | 1.033898305 |
| ENSG00000256980 | KHDC1L        | 1 | 0.340699816 |
| ENSG00000257103 | LSM14A        | 1 | 1.033519553 |
| ENSG00000257335 | MGAM          | 1 | 1.034285714 |
| ENSG00000257482 | ZNF727        | 1 | 1.033519553 |
| ENSG00000257594 | GALNT4        | 1 | 0.730427764 |
| ENSG00000257704 | PRR24         | 1 | 0.340699816 |
| ENSG00000257743 | RP11-1220K2.2 | 1 | 0.340699816 |
| ENSG00000258417 | OC90          | 1 | 1.033898305 |
| ENSG00000258472 | RP11-192H23.4 | 1 | 1.033898305 |
| ENSG00000258643 | BCL2L2-PABPN1 | 1 | 1.033519553 |
| ENSG00000258724 | SOX7          | 1 | 1.033519553 |
| ENSG00000258838 | ERCC6-PGBD3   | 1 | 0.340699816 |

|                 |                    |   |             |
|-----------------|--------------------|---|-------------|
| ENSG00000258941 | RP11-407N17.3      | 1 | 0.795555556 |
| ENSG00000258973 | RP11-934B9.3       | 1 | 0.340699816 |
| ENSG00000259030 | FPGT-TNNI3K        | 1 | 1.033519553 |
| ENSG00000259075 | POC1B-GALNT4       | 1 | 1.033898305 |
| ENSG00000259494 | MRPL46             | 1 | 0.613407821 |
| ENSG00000260230 | FRRS1L             | 1 | 1.033519553 |
| ENSG00000260861 | RP4-576H24.4       | 1 | 0.340699816 |
| ENSG00000260916 | CCPG1              | 1 | 1.034285714 |
| ENSG00000261609 | GAN                | 1 | 0.340699816 |
| ENSG00000262246 | CORO7              | 1 | 1.033898305 |
| ENSG00000262621 | NAA60              | 1 | 0.340699816 |
| ENSG00000262660 | SLC25A10           | 1 | 1.033519553 |
| ENSG00000262814 | MRPL12             | 1 | 1.033519553 |
| ENSG00000263020 | CSNK2B-LY6G5B-1181 | 1 | 0.340699816 |
| ENSG00000265590 | AP000275.65        | 1 | 0.340699816 |
| ENSG00000266956 | CTB-186H2.3        | 1 | 0.340699816 |
| ENSG00000267041 | ZNF850             | 1 | 0.340699816 |
| ENSG00000267140 | RP11-322E11.6      | 1 | 0.340699816 |
| ENSG00000267467 | APOC4              | 1 | 0.340699816 |
| ENSG00000267796 | LIN37              | 1 | 0.340699816 |
| ENSG00000267987 | AL161784.1         | 1 | 1.033519553 |
| ENSG00000268069 | AC004466.1         | 1 | 1.033519553 |
| ENSG00000268175 | AC117395.1         | 1 | 0.340699816 |
| ENSG00000268179 | AL645608.1         | 1 | 1.033519553 |
| ENSG00000268182 | SMIM17             | 1 | 1.033519553 |
| ENSG00000268657 | AL133373.1         | 1 | 0.340699816 |
| ENSG00000269113 | TRABD2B            | 1 | 1.033898305 |
| ENSG00000269383 | AC012493.2         | 1 | 0.340699816 |
| ENSG00000269858 | EGLN2              | 1 | 0.340699816 |
| ENSG00000269871 | AC040977.1         | 1 | 0.340699816 |
| ENSG00000269881 | ITFG3              | 1 | 0.613407821 |
| ENSG00000269891 | ARHGAP19-SLIT1     | 1 | 1.033519553 |
| ENSG00000269897 | COMMD3-BMI1        | 1 | 0.340699816 |
| ENSG00000270386 | UGT2A1             | 1 | 1.034285714 |
| ENSG00000270466 | SEPT1              | 1 | 1.033519553 |
| ENSG00000270898 | ASB3               | 1 | 1.033519553 |
| ENSG00000271786 | RP11-139J15.7      | 1 | 1.033519553 |
| ENSG00000272333 | KMT2B              | 1 | 1.033898305 |
| ENSG00000272414 | FAM47E-STBD1       | 1 | 1.033519553 |
| ENSG00000272573 | MUSTN1             | 1 | 1.033519553 |
| ENSG00000272781 | MDGA2              | 1 | 1.033519553 |
| ENSG00000273171 | CTB-96E2.2         | 1 | 1.033519553 |
| ENSG00000273217 | CTC-432M15.3       | 1 | 1.033519553 |

## **Supplemental Digital Content 8**













## **Supplemental Digital Content 9**



## **Supplemental Digital Content 10**



## **Supplemental Digital Content 11**



## **Supplemental Digital Content 12**

| <b>Ethanol Degradation II (16/19)</b> | <b>Oxidative Ethanol Degradation III (9/10)</b> | <b>Ethanol Degradation IV (10/12)</b> |
|---------------------------------------|-------------------------------------------------|---------------------------------------|
| <b><u>ACSS1</u></b>                   | <b><u>ACSS1</u></b>                             | <b><u>ACSS1</u></b>                   |
| ACSS2                                 | ACSS2                                           | ACSS2                                 |
| <b><u>ACSS3</u></b>                   | <b><u>ACSS3</u></b>                             | <b><u>ACSS3</u></b>                   |
| <b><u>ADH4</u></b>                    | <b><u>ALDH2</u></b>                             | <b><u>ALDH2</u></b>                   |
| <b><u>ADH6</u></b>                    | <b><u>ALDH1B1</u></b>                           | <b><u>ALDH1B1</u></b>                 |
| ADH1A                                 | <b><u>ALDH3A1</u></b>                           | <b><u>ALDH3A1</u></b>                 |
| <b><u>ADH1B</u></b>                   | <b><u>ALDH3A2</u></b>                           | <b><u>ALDH3A2</u></b>                 |
| AKR1A1                                | <b><u>ALDH3B1</u></b>                           | <b><u>ALDH3B1</u></b>                 |
| <b><u>ALDH2</u></b>                   | <b><u>ALDH7A1</u></b>                           | <b><u>ALDH7A1</u></b>                 |
| <b><u>ALDH1B1</u></b>                 | <b><u>ALDH9A1</u></b>                           | <b><u>ALDH9A1</u></b>                 |
| <b><u>ALDH3A1</u></b>                 |                                                 | CAT                                   |
| <b><u>ALDH3A2</u></b>                 |                                                 | <b><u>TYRP1</u></b>                   |
| <b><u>ALDH3B1</u></b>                 |                                                 |                                       |
| <b><u>ALDH7A1</u></b>                 |                                                 |                                       |
| <b><u>ALDH9A1</u></b>                 |                                                 |                                       |
| <b><u>DHRS2</u></b>                   |                                                 |                                       |
| <b><u>DHRS4</u></b>                   |                                                 |                                       |
| <b><u>DHRS9</u></b>                   |                                                 |                                       |
| <b><u>PECR</u></b>                    |                                                 |                                       |

## **Supplemental Digital Content 13**



## **Supplemental Digital Content 14**



## **Supplemental Digital Content 15**

biological\_process



## **Supplemental Digital Content 16**



## **Supplemental Digital Content 17**



## **Supplemental Digital Content 18**
